# Supplementary material
Source: Research Square preprint supplement (doi:10.21203/rs.3.rs-9812393/v1)
Supplement: Supplementary file 1 [file 0e88eee831a0b1f8dbaadec7.xlsx]

## Sheet: Sheet1
序号	提交答卷时间	所用时间	来源	来源详情	来自IP	总分	1、性别:	2、年级：	3、您的专业属于：	4、您目前专业所属的本科类型是：	5、你的生源地（家庭所在地）:	6、父亲的受教育程度:	7、母亲的受教育程度:	8、你上学期（或最近一学年）的综合成绩在班级排名大致为:	9、你是否正在担任或担任过学生干部（班级、院系或社团）:	10、你是否参加过学校开设的“职业生涯规划”课程或相关讲座/活动?	11、您是否有过兼职或实习经历:	12、职业探索(Career Exploration)—C1.我主动搜集过与所学专业相关的职业信息（如岗位要求、发展前景、薪资水平）。	12、C2.我通过实习、兼职、访谈学长学姐或职场人士等方式，深入了解过目标职业。	12、C3.我清楚自己心仪的职业领域需要具备哪些核心技能和资格证书。	12、C4.我经常思考自己的兴趣、能力与未来职业的匹配度。	13、职业目标清晰度(Career Clarity)—C5.我对毕业后想从事的行业或岗位有比较清晰的方向。	13、C6.我有一个明确的职业发展愿景（如成为技术专家、管理者、创业者等）。	13、C7.我设定的职业目标符合我个人的价值观和兴趣。	13、C8.我知道为了实现职业目标，我在大学期间需要完成哪些关键任务。	14、职业规划执行力(Career Planning)—C9.我为实现职业目标制定了具体的学习或发展计划（如如参赛、考证、考研等）。	14、C10.我会根据职业目标的变化，及时调整我的学习计划和重点。	14、C11.我目前的选课、考证、实习等活动，都是围绕我的职业目标来安排的。	14、C12.我认为所学内容能够帮助我实现未来职业目标。	15、认知投入(Cognitive Engagement)—S1.我会将课堂上所学的知识与已有的经验或现实问题联系起来思考。	15、S2.当阅读教材或文献时，我会试图批判性地审视其中的观点。	15、S3.我会花时间深入探究某个感兴趣的专业问题，而不仅仅是应付考试。	15、S4.我经常反思自己的学习方法，并试图找到改进的方式。	16、行为投入(Behavioral Engagement)—S5.我能够按时、认真地完成老师布置的作业或课程设计。	16、S6.除了上课，我每周花费较长时间在自主学习上（如复习、阅读、练习）。	16、S7.即使课程内容枯燥或困难，我也会坚持学下去。	16、S8.我会积极参与课堂讨论，主动向老师提问。	17、实践/技能投入(Practical Engagement)—S9.我课余时间会主动去实验室、实训室或工作室练习操作技能。	17、S10.我积极准备并考取与专业相关的职业资格证书或技能等级证书。	17、S11.我会关注并尝试参加专业技能竞赛、创新创业大赛或科研项目。	17、S12.我会主动寻找机会参与社会实践、企业实习或兼职（与专业相关）。	18、专业认同(Professional Identity)—I1.我对现在所学的专业充满热情。	18、I2.我愿意向他人（如生源学校学弟学妹、亲友等）推荐我的专业。	18、I3.提到所学专业，我会有一种归属感和自豪感。	18、I4.我认可所学专业的社会价值和贡献。	19、学习自我效能感(Academic Self-Efficacy)—I5.我有信心能够掌握课堂上所学的专业知识和技能。	19、I6.我相信自己能够理解本专业学习中最复杂的内容。	19、I7.面对困难的学习任务，我坚信自己能够完成。	19、I8.与其他同学相比，我认为自己学习专业课程的能力更强。
1	2026/4/7 12:28:06	173秒	微信	N/A	144.12.90.251(山东-济南)	212	2	3	2	1	2	1	2	1	1	1	1	7	7	6	6	6	5	6	7	7	7	7	6	7	7	7	7	7	7	6	7	6	7	7	7	7	6	6	6	7	7	7	7
2	2026/4/7 12:29:01	59秒	手机提交	直接访问	120.225.109.130(山东-临沂)	147	1	4	2	1	2	3	1	2	1	1	2	5	4	5	5	5	5	4	5	5	4	5	5	5	4	5	5	5	5	4	5	4	5	5	4	4	4	5	4	4	4	5	4
3	2026/4/7 12:30:55	121秒	微信	N/A	223.104.194.186(山东-济南)	128	2	1	2	1	1	2	2	4	2	1	4	4	4	4	4	4	4	4	4	4	4	4	4	4	4	4	4	4	4	4	4	4	4	4	4	4	4	4	4	4	4	4	4
4	2026/4/7 12:30:55	106秒	微信	N/A	124.133.254.242(山东-济南)	224	2	1	2	1	2	1	1	1	1	1	1	7	7	7	7	7	7	7	7	7	7	7	7	7	7	7	7	7	7	7	7	7	7	7	7	7	7	7	7	7	7	7	7
5	2026/4/7 12:30:59	58秒	微信	N/A	223.104.195.93(山东-泰安)	211	2	4	2	1	2	2	2	2	2	3	2	7	6	7	6	6	6	7	6	7	6	7	7	7	6	7	6	7	7	7	6	7	7	7	7	7	6	7	6	7	6	7	6
6	2026/4/7 12:31:00	106秒	微信	N/A	223.104.194.172(山东-济南)	92	2	1	2	1	4	1	1	1	2	1	1	3	3	3	3	2	2	2	2	3	3	3	3	3	3	3	3	3	3	3	3	3	3	3	3	3	3	3	3	3	3	3	3
7	2026/4/7 12:31:50	67秒	微信	N/A	223.160.165.1(山东-济南)	143	2	1	2	1	4	2	2	4	2	2	2	7	6	4	4	4	5	3	5	5	3	6	6	5	3	3	2	5	3	3	6	5	5	5	5	5	3	4	5	5	5	4	4
8	2026/4/7 12:32:26	151秒	微信	N/A	119.163.147.232(山东-济南)	146	2	4	2	1	4	2	2	1	2	1	3	6	5	5	5	5	5	5	5	4	4	4	4	5	4	5	4	6	5	5	5	4	4	4	4	5	4	4	5	4	4	4	4
9	2026/4/7 12:32:26	207秒	手机提交	直接访问	39.144.109.171(山东-聊城)	185	2	4	2	1	4	1	2	2	2	1	3	6	6	7	6	6	5	5	6	7	6	6	6	6	6	6	5	6	6	6	4	5	6	7	6	6	6	6	6	5	5	5	5
10	2026/4/7 12:34:06	243秒	手机提交	直接访问	39.144.109.155(山东-聊城)	166	1	4	2	1	4	2	2	2	2	1	3	7	7	4	4	4	4	4	4	4	3	3	4	6	4	6	6	7	7	7	7	4	4	4	4	7	7	7	7	6	5	5	4
11	2026/4/7 12:34:37	177秒	微信	N/A	39.144.110.125(山东-临沂)	150	2	4	2	1	4	2	1	2	1	2	1	5	3	4	4	4	3	4	4	5	5	6	4	5	4	5	4	6	5	5	4	4	6	6	5	4	5	5	5	5	5	6	5
12	2026/4/7 12:34:50	249秒	微信	N/A	124.133.254.224(山东-济南)	124	2	1	2	1	4	2	1	2	1	1	1	4	2	4	4	2	2	3	3	5	4	3	3	4	4	4	4	5	4	5	4	3	5	4	5	4	5	4	5	4	5	4	3
13	2026/4/7 12:36:16	283秒	微信	N/A	124.130.3.92(山东-临沂)	166	2	4	2	1	3	1	1	1	2	3	3	5	5	6	5	6	5	6	5	5	5	6	5	4	5	5	5	6	4	5	5	5	5	6	5	4	6	5	5	6	5	5	6
14	2026/4/7 12:38:54	103秒	微信	N/A	39.182.15.160(浙江-杭州)	209	2	4	2	1	1	3	3	1	2	1	2	6	4	6	6	7	7	7	7	7	7	7	6	7	7	7	7	7	7	7	7	7	7	7	7	6	6	7	6	6	5	6	6
15	2026/4/7 12:43:06	57秒	微信	N/A	223.104.194.187(山东-济南)	224	2	1	2	1	4	1	1	1	1	1	1	7	7	7	7	7	7	7	7	7	7	7	7	7	7	7	7	7	7	7	7	7	7	7	7	7	7	7	7	7	7	7	7
16	2026/4/7 12:47:09	90秒	微信	N/A	112.224.1.11(山东-济南)	122	2	1	2	1	4	2	1	3	2	1	4	1	1	1	3	1	1	1	1	1	1	1	1	5	5	5	5	5	5	5	5	5	5	5	5	6	6	6	6	6	6	6	6
17	2026/4/7 12:47:52	184秒	微信	N/A	223.99.163.164(山东-济南)	127	2	1	2	1	4	1	1	5	2	1	1	2	4	6	5	6	3	4	5	5	5	4	5	5	4	4	4	4	4	5	4	3	4	2	3	3	2	3	3	4	4	4	4
18	2026/4/7 12:48:07	218秒	微信	N/A	112.230.183.215(山东-济南)	164	2	1	2	1	4	2	2	1	2	1	1	4	5	7	6	6	5	5	5	5	5	4	6	5	5	5	5	5	5	5	5	5	5	5	5	5	5	5	6	5	5	5	5
19	2026/4/7 13:07:26	66秒	微信	N/A	223.104.194.163(山东-济南)	160	1	2	2	1	2	3	3	3	2	2	1	5	5	5	5	5	5	5	5	5	5	5	5	5	5	5	5	5	5	5	5	5	5	5	5	5	5	5	5	5	5	5	5
20	2026/4/7 13:07:46	85秒	微信	N/A	112.224.217.186(山东-济南)	191	1	2	5	1	2	2	2	1	1	1	3	5	6	6	6	6	6	6	6	6	6	6	6	6	6	6	6	6	6	6	6	6	6	6	6	6	6	6	6	6	6	6	6
21	2026/4/7 13:09:15	73秒	微信	N/A	223.97.136.118(山东-烟台)	128	2	4	2	1	4	2	1	5	2	1	3	4	4	4	4	4	4	4	4	4	4	4	4	4	4	4	4	4	4	4	4	4	4	4	4	4	4	4	4	4	4	4	4
22	2026/4/7 13:09:17	66秒	微信	N/A	223.104.196.81(山东-济宁)	135	2	4	2	1	4	1	1	3	2	1	2	4	4	5	4	6	5	5	5	3	4	3	4	4	4	4	4	4	4	4	4	4	4	4	4	6	4	4	4	4	5	4	4
23	2026/4/7 13:09:24	66秒	微信	N/A	111.17.96.113(山东-淄博)	32	1	1	1	1	3	1	1	1	1	1	1	1	1	1	1	1	1	1	1	1	1	1	1	1	1	1	1	1	1	1	1	1	1	1	1	1	1	1	1	1	1	1	1
24	2026/4/7 13:10:20	85秒	微信	N/A	223.104.194.179(山东-济南)	160	2	2	2	1	4	1	1	1	2	1	4	5	5	5	5	5	5	5	5	5	5	5	5	5	5	5	5	5	5	5	5	5	5	5	5	5	5	5	5	5	5	5	5
25	2026/4/7 13:10:54	85秒	微信	N/A	112.224.142.38(山东-济南)	128	2	4	2	1	4	1	1	2	2	2	3	4	4	4	4	4	4	4	4	4	4	4	4	4	4	4	4	4	4	4	4	4	4	4	4	4	4	4	4	4	4	4	4
26	2026/4/7 13:11:12	182秒	微信	N/A	223.104.194.155(山东-济南)	128	2	4	2	1	4	1	1	3	2	1	3	4	4	5	5	3	3	3	3	5	5	4	4	4	4	4	4	5	4	4	4	4	5	4	5	3	3	3	4	4	4	4	4
27	2026/4/7 13:11:28	103秒	微信	N/A	112.224.218.164(山东-济南)	160	2	2	2	1	4	1	1	2	2	2	3	5	5	5	5	5	5	5	5	5	5	5	5	5	5	5	5	5	5	5	5	5	5	5	5	5	5	5	5	5	5	5	5
28	2026/4/7 13:11:28	119秒	微信	N/A	112.254.241.147(山东-青岛)	128	2	4	2	1	4	2	2	4	2	2	3	4	4	4	4	4	4	4	4	4	4	4	4	4	4	4	4	4	4	4	4	4	4	4	4	4	4	4	4	4	4	4	4
29	2026/4/7 13:11:42	90秒	微信	N/A	223.96.229.83(山东-菏泽)	192	1	4	2	1	2	1	1	4	2	3	2	6	6	6	6	6	6	6	6	6	6	6	6	6	6	6	6	6	6	6	6	6	6	6	6	6	6	6	6	6	6	6	6
30	2026/4/7 13:12:05	92秒	微信	N/A	39.144.108.157(山东-东营)	125	2	4	2	1	1	2	2	5	1	1	3	5	5	5	5	2	2	3	2	4	4	4	4	4	4	4	4	4	4	4	4	4	4	4	4	4	4	4	4	4	4	4	4
31	2026/4/7 13:12:57	118秒	微信	N/A	223.99.163.166(山东-济南)	193	2	2	3	2	4	2	1	1	1	1	1	4	3	7	7	7	7	7	7	6	6	6	6	6	6	6	6	6	6	6	6	6	6	6	6	6	6	6	6	6	6	6	6
32	2026/4/7 13:13:52	342秒	微信	N/A	221.3.63.118(山东-青岛)	148	2	4	2	1	4	1	1	2	2	2	3	6	6	4	5	4	4	4	5	5	5	4	4	5	4	5	5	6	5	5	4	4	5	4	5	5	4	4	5	4	5	3	5
33	2026/4/7 13:14:52	70秒	微信	N/A	39.144.109.143(山东-聊城)	128	2	2	5	1	2	2	2	1	1	2	1	4	4	4	4	4	4	4	4	4	4	4	4	4	4	4	4	4	4	4	4	4	4	4	4	4	4	4	4	4	4	4	4
34	2026/4/7 13:14:58	71秒	微信	N/A	112.53.79.13(山东-济南)	224	1	2	5	1	4	3	1	1	1	2	1	7	7	7	7	7	7	7	7	7	7	7	7	7	7	7	7	7	7	7	7	7	7	7	7	7	7	7	7	7	7	7	7
35	2026/4/7 13:15:07	51秒	微信	N/A	112.224.162.244(山东-济南)	177	1	2	2	2	4	1	1	2	2	2	3	7	6	5	6	6	6	6	6	6	6	6	5	3	6	5	5	5	5	5	5	5	5	6	5	6	6	6	6	6	5	5	6
36	2026/4/7 13:15:39	91秒	微信	N/A	223.104.194.160(山东-济南)	142	2	2	1	1	2	2	2	1	1	1	1	4	4	3	5	4	3	4	4	4	4	4	4	4	4	4	4	5	5	5	5	5	4	5	5	5	5	5	5	5	5	5	5
37	2026/4/7 13:15:45	78秒	微信	N/A	112.53.79.11(山东-济南)	221	1	2	2	1	4	1	1	4	2	1	1	7	4	7	7	7	7	7	7	7	7	7	7	7	7	7	7	7	7	7	7	7	7	7	7	7	7	7	7	7	7	7	7
38	2026/4/7 13:16:10	98秒	微信	N/A	218.58.41.11(山东-济南)	217	1	2	3	1	2	1	2	1	1	2	3	7	7	7	7	7	7	7	7	7	7	4	7	6	7	7	7	6	7	7	6	6	7	7	7	7	7	7	7	7	7	7	7
39	2026/4/7 13:16:14	74秒	微信	N/A	112.232.212.21(山东-济南)	146	1	2	3	1	2	2	2	5	2	3	1	5	5	5	5	5	4	4	5	5	5	4	4	5	5	5	4	5	5	4	4	5	5	4	5	5	4	4	4	4	5	4	4
40	2026/4/7 13:16:15	84秒	微信	N/A	123.233.72.90(山东-济南)	128	2	2	5	1	4	1	1	4	2	1	1	4	4	4	4	4	4	4	4	4	4	4	4	4	4	4	4	4	4	4	4	4	4	4	4	4	4	4	4	4	4	4	4
41	2026/4/7 13:16:20	107秒	微信	N/A	112.224.224.94(山东-济南)	118	2	2	3	1	3	1	1	1	1	3	1	7	4	4	7	1	1	1	1	3	3	3	3	4	4	4	4	4	4	4	4	4	4	4	4	4	4	4	4	4	4	4	4
42	2026/4/7 13:16:44	150秒	微信	N/A	182.33.145.45(山东-潍坊)	122	2	2	2	1	3	1	1	4	2	3	1	4	4	4	4	3	2	2	3	3	3	3	3	2	3	2	3	7	4	4	3	2	3	2	3	5	7	7	7	5	5	5	5
43	2026/4/7 13:16:46	80秒	微信	N/A	39.144.109.173(山东-聊城)	154	2	2	2	1	4	1	1	2	1	2	1	6	6	6	4	4	6	5	5	3	5	5	1	7	6	4	4	5	5	5	5	5	5	5	5	4	4	4	4	5	5	5	6
44	2026/4/7 13:17:01	164秒	微信	N/A	223.160.165.46(山东-济南)	166	1	2	3	1	3	1	1	5	1	2	3	5	1	7	4	7	6	5	4	4	4	6	7	3	6	6	5	7	7	5	7	5	5	5	5	5	5	5	5	5	5	5	5
45	2026/4/7 13:17:43	90秒	微信	N/A	39.144.109.129(山东-聊城)	128	2	2	3	1	4	1	1	2	2	3	1	4	4	4	4	4	4	4	4	4	4	4	4	4	4	4	4	4	4	4	4	4	4	4	4	4	4	4	4	4	4	4	4
46	2026/4/7 13:18:09	71秒	微信	N/A	112.224.218.226(山东-济南)	157	2	2	5	1	2	2	2	1	2	1	1	5	5	5	5	5	5	5	5	5	5	4	5	5	4	5	5	5	4	5	5	5	5	5	5	5	5	5	5	5	5	5	5
47	2026/4/7 13:18:11	151秒	微信	N/A	112.224.218.36(山东-济南)	119	2	1	5	1	2	1	2	4	2	1	1	5	5	5	5	2	2	2	2	5	5	4	4	5	5	3	3	4	3	3	4	2	5	3	3	5	3	5	5	3	3	3	3
48	2026/4/7 13:18:27	97秒	微信	N/A	39.144.109.164(山东-聊城)	130	1	2	3	1	4	2	1	3	1	2	1	4	5	5	4	4	4	4	4	4	4	4	4	4	4	4	4	4	4	4	4	4	4	4	4	4	4	4	4	4	4	4	4
49	2026/4/7 13:18:37	69秒	微信	N/A	112.224.224.238(山东-济南)	224	2	2	5	1	4	2	2	1	1	1	1	7	7	7	7	7	7	7	7	7	7	7	7	7	7	7	7	7	7	7	7	7	7	7	7	7	7	7	7	7	7	7	7
50	2026/4/7 13:18:56	121秒	微信	N/A	223.104.194.187(山东-济南)	150	2	2	5	1	4	1	1	1	2	2	1	4	3	4	6	3	3	4	4	3	4	4	4	4	4	4	5	7	7	5	6	4	5	4	6	5	5	4	7	6	5	6	5
51	2026/4/7 13:19:02	106秒	微信	N/A	112.224.191.241(山东-济南)	163	2	2	3	1	4	1	2	2	2	2	1	5	4	4	4	5	4	4	5	5	4	4	5	5	5	4	5	5	5	6	6	6	6	6	6	6	6	6	5	6	5	6	5
52	2026/4/7 13:19:20	123秒	微信	N/A	223.104.194.94(山东-济南)	192	2	4	3	1	2	1	1	2	2	2	3	6	6	6	6	6	6	6	6	6	6	6	6	6	6	6	6	6	6	6	6	6	6	6	6	6	6	6	6	6	6	6	6
53	2026/4/7 13:19:39	169秒	微信	N/A	223.104.194.141(山东-济南)	133	2	2	5	1	4	1	1	2	2	1	3	3	5	2	3	4	3	4	5	3	3	4	4	4	3	3	4	7	6	5	4	3	4	4	5	5	4	5	5	5	5	5	4
54	2026/4/7 13:21:00	132秒	微信	N/A	223.104.194.150(山东-济南)	189	1	2	3	1	4	1	1	2	1	1	1	6	5	7	5	7	6	7	4	7	5	7	7	5	5	5	7	5	6	4	7	5	6	6	7	6	5	5	7	6	7	5	7
55	2026/4/7 13:21:23	183秒	微信	N/A	119.177.43.245(山东-潍坊)	183	2	4	2	1	4	1	1	1	2	2	3	6	5	4	6	5	5	6	6	6	6	6	6	6	6	6	5	6	6	5	6	6	7	6	6	5	5	5	5	6	7	6	6
56	2026/4/7 13:23:28	202秒	微信	N/A	112.224.220.106(山东-济南)	114	2	2	5	1	4	1	1	2	2	3	1	4	4	4	3	3	3	3	3	3	3	3	3	4	2	3	4	5	4	4	3	3	3	2	4	4	5	4	4	4	5	4	4
57	2026/4/7 13:26:44	721秒	微信	N/A	39.144.109.154(山东-聊城)	191	2	2	5	1	4	1	1	2	2	1	1	5	4	7	5	5	4	6	7	7	7	7	6	5	4	5	5	7	6	7	6	4	7	6	6	7	7	7	7	7	6	6	6
58	2026/4/7 13:27:30	180秒	微信	N/A	39.144.109.140(山东-聊城)	196	2	2	3	1	4	2	2	1	1	1	1	7	7	5	5	4	3	5	4	4	4	5	3	7	7	7	7	7	7	7	7	7	7	7	7	7	7	7	7	7	7	7	7
59	2026/4/7 13:28:08	53秒	微信	N/A	123.233.72.134(山东-济南)	116	1	1	1	1	1	3	3	3	1	1	1	4	4	5	4	4	2	2	3	4	3	3	3	3	4	3	3	3	4	3	3	5	2	5	3	5	5	5	5	5	2	5	2
60	2026/4/7 13:28:22	63秒	微信	N/A	112.224.218.131(山东-济南)	128	2	1	1	1	4	2	2	1	1	2	4	4	4	4	4	4	4	4	4	4	4	4	4	4	4	4	4	4	4	4	4	4	4	4	4	4	4	4	4	4	4	4	4
61	2026/4/7 13:28:52	77秒	微信	N/A	39.144.109.157(山东-聊城)	224	1	1	1	1	3	1	1	1	1	1	1	7	7	7	7	7	7	7	7	7	7	7	7	7	7	7	7	7	7	7	7	7	7	7	7	7	7	7	7	7	7	7	7
62	2026/4/7 13:29:04	49秒	微信	N/A	112.53.79.12(山东-济南)	128	1	1	1	1	1	3	3	3	2	3	4	4	4	4	4	4	4	4	4	4	4	4	4	4	4	4	4	4	4	4	4	4	4	4	4	4	4	4	4	4	4	4	4
63	2026/4/7 13:29:07	111秒	微信	N/A	39.144.109.165(山东-聊城)	158	2	1	1	1	4	1	1	1	2	1	1	4	4	4	6	5	5	5	5	5	5	5	5	5	5	5	5	6	5	5	5	4	4	4	4	4	5	5	5	6	6	6	6
64	2026/4/7 13:29:09	115秒	微信	N/A	223.104.194.191(山东-济南)	160	1	1	5	1	3	2	2	5	2	2	1	5	5	5	5	5	5	5	5	5	5	5	5	5	5	5	5	5	5	5	5	5	5	5	5	5	5	5	5	5	5	5	5
65	2026/4/7 13:29:21	101秒	微信	N/A	39.144.109.168(山东-聊城)	126	2	1	1	1	4	2	1	1	1	2	4	3	1	3	4	4	4	4	4	4	4	3	4	4	3	4	4	3	4	4	3	4	5	4	5	5	4	5	4	5	5	4	5
66	2026/4/7 13:29:22	122秒	微信	N/A	223.99.163.165(山东-济南)	224	1	1	1	1	3	1	1	5	2	1	2	7	7	7	7	7	7	7	7	7	7	7	7	7	7	7	7	7	7	7	7	7	7	7	7	7	7	7	7	7	7	7	7
67	2026/4/7 13:29:48	140秒	微信	N/A	223.99.163.164(山东-济南)	154	2	1	2	1	1	2	3	3	1	1	3	2	3	5	6	3	5	7	6	4	5	6	6	5	3	5	6	6	6	6	6	6	6	3	7	6	4	3	6	4	3	2	3
68	2026/4/7 13:30:05	55秒	微信	N/A	112.224.222.120(山东-济南)	224	1	1	1	1	4	1	1	1	1	1	1	7	7	7	7	7	7	7	7	7	7	7	7	7	7	7	7	7	7	7	7	7	7	7	7	7	7	7	7	7	7	7	7
69	2026/4/7 13:30:14	127秒	微信	N/A	39.144.109.166(山东-聊城)	61	1	1	1	1	2	1	1	3	2	1	1	5	1	2	3	1	1	1	1	1	1	1	1	1	1	1	1	4	2	2	1	1	1	1	1	5	5	3	3	3	2	2	2
70	2026/4/7 13:30:14	59秒	微信	N/A	39.144.109.189(山东-聊城)	56	1	1	1	1	4	1	1	1	1	1	1	7	7	7	7	1	1	1	1	1	1	1	1	1	1	1	1	1	1	1	1	1	1	1	1	1	1	1	1	1	1	1	1
71	2026/4/7 13:30:28	193秒	微信	N/A	112.224.220.120(山东-济南)	163	1	1	1	1	2	3	3	1	1	1	1	6	2	4	6	4	4	4	5	5	5	5	5	4	5	6	6	4	5	6	5	5	5	5	5	6	6	5	6	6	6	6	6
72	2026/4/7 13:30:37	101秒	微信	N/A	182.39.132.161(山东-枣庄)	64	1	1	1	1	4	1	1	5	2	2	3	2	2	2	2	2	2	2	2	2	2	2	2	2	2	2	2	2	2	2	2	2	2	2	2	2	2	2	2	2	2	2	2
73	2026/4/7 13:30:39	189秒	微信	N/A	112.224.227.165(山东-济南)	155	2	1	2	1	4	1	1	1	2	3	4	5	5	4	5	5	4	5	5	5	4	5	5	5	4	5	5	6	4	5	5	4	5	4	5	5	6	6	6	5	4	5	4
74	2026/4/7 13:30:57	154秒	微信	N/A	223.104.194.133(山东-济南)	112	2	1	2	1	4	2	1	2	2	2	1	3	3	3	3	3	2	3	4	4	4	4	4	3	4	4	4	2	5	3	3	4	5	4	3	3	2	3	4	4	4	4	4
75	2026/4/7 13:30:57	97秒	微信	N/A	39.144.109.135(山东-聊城)	160	1	1	1	1	2	2	2	1	2	1	4	5	5	5	5	5	5	5	5	5	5	5	5	5	5	5	5	5	5	5	5	5	5	5	5	5	5	5	5	5	5	5	5
76	2026/4/7 13:31:26	179秒	微信	N/A	223.104.194.178(山东-济南)	184	2	1	1	1	4	1	2	1	2	1	1	7	7	5	6	5	5	4	4	6	6	6	7	6	7	6	7	6	4	5	3	4	4	4	6	6	7	7	7	7	7	7	6
77	2026/4/7 13:31:44	185秒	微信	N/A	223.104.194.184(山东-济南)	136	2	1	1	1	3	1	2	4	2	1	1	6	6	6	6	4	4	4	4	4	4	4	4	4	4	4	4	4	4	4	4	4	4	4	4	4	4	4	4	4	4	4	4
78	2026/4/7 13:31:59	72秒	微信	N/A	223.104.194.141(山东-济南)	128	2	2	5	1	2	2	2	5	2	3	4	4	4	4	4	4	4	4	4	4	4	4	4	4	4	4	4	4	4	4	4	4	4	4	4	4	4	4	4	4	4	4	4
79	2026/4/7 13:33:16	288秒	微信	N/A	39.144.109.173(山东-聊城)	152	2	2	5	1	4	1	1	3	2	3	1	7	6	5	5	4	4	5	3	3	3	3	4	4	4	4	4	7	4	7	4	4	4	5	6	7	7	7	7	4	3	4	4
80	2026/4/7 13:34:02	196秒	微信	N/A	223.99.163.166(山东-济南)	169	2	2	3	1	2	2	2	2	2	3	1	6	4	6	5	4	4	4	6	5	6	6	6	6	4	5	6	6	5	5	4	5	6	5	6	6	6	6	6	5	5	5	5
81	2026/4/7 13:34:10	149秒	微信	N/A	39.144.109.182(山东-聊城)	220	2	1	1	1	2	3	3	1	1	2	4	6	6	6	6	7	7	7	7	7	7	7	7	7	7	7	7	7	7	7	7	7	7	7	7	7	7	7	7	7	7	7	7
82	2026/4/7 13:34:26	72秒	微信	N/A	112.224.191.73(山东-济南)	160	2	2	5	1	4	2	1	1	1	2	1	5	5	5	5	5	5	5	5	5	5	5	5	5	5	5	5	5	5	5	5	5	5	5	5	5	5	5	5	5	5	5	5
83	2026/4/7 13:34:29	119秒	微信	N/A	112.224.222.255(山东-济南)	194	1	1	2	1	2	1	1	5	2	2	1	6	6	6	6	6	6	6	6	6	6	6	6	6	6	6	7	7	6	6	6	6	6	6	6	5	6	6	7	6	6	6	6
84	2026/4/7 13:34:36	142秒	微信	N/A	112.230.183.120(山东-济南)	224	1	1	2	1	4	1	1	2	2	2	1	7	7	7	7	7	7	7	7	7	7	7	7	7	7	7	7	7	7	7	7	7	7	7	7	7	7	7	7	7	7	7	7
85	2026/4/7 13:34:41	258秒	微信	N/A	112.224.141.169(山东-济南)	123	1	1	2	1	2	2	2	1	1	1	1	6	4	4	6	4	3	3	3	5	4	4	3	3	3	3	3	4	3	3	3	3	3	4	4	5	5	5	5	4	3	4	4
86	2026/4/7 13:34:41	219秒	微信	N/A	39.144.109.163(山东-聊城)	206	2	1	1	1	4	2	2	3	2	1	4	7	5	5	7	5	6	7	7	7	7	7	7	7	7	7	7	7	5	6	6	4	6	6	5	7	7	7	7	7	7	7	7
87	2026/4/7 13:34:50	87秒	微信	N/A	39.144.109.172(山东-聊城)	148	2	2	2	1	2	2	2	4	2	2	1	5	5	5	5	5	5	4	4	4	4	5	5	5	5	5	5	5	4	5	4	5	4	5	4	5	4	5	4	5	4	5	4
88	2026/4/7 13:34:53	103秒	微信	N/A	223.104.195.252(山东-泰安)	224	1	1	1	1	4	1	1	3	2	2	1	7	7	7	7	7	7	7	7	7	7	7	7	7	7	7	7	7	7	7	7	7	7	7	7	7	7	7	7	7	7	7	7
89	2026/4/7 13:35:29	479秒	微信	N/A	223.104.194.145(山东-济南)	176	2	1	5	1	2	2	2	1	2	2	1	7	6	5	6	6	6	6	6	6	7	7	6	5	5	5	5	7	6	5	3	1	6	4	7	6	5	6	6	5	5	5	5
90	2026/4/7 13:35:40	315秒	微信	N/A	223.104.194.177(山东-济南)	129	2	2	5	1	4	2	2	1	1	2	1	4	4	4	4	3	3	4	3	5	4	4	4	5	4	4	4	6	4	3	4	3	5	4	5	4	4	4	4	4	4	4	4
91	2026/4/7 13:35:48	295秒	微信	N/A	39.144.109.149(山东-聊城)	101	2	1	1	1	4	1	1	2	2	1	4	3	1	4	3	3	3	3	4	3	3	3	3	3	3	3	3	3	3	3	3	3	3	3	3	4	4	4	4	3	3	4	3
92	2026/4/7 13:35:55	167秒	微信	N/A	39.144.109.175(山东-聊城)	192	2	1	1	1	4	1	1	4	2	1	1	6	6	6	6	6	6	6	6	6	6	6	6	6	6	6	6	6	6	6	6	6	6	6	6	6	6	6	6	6	6	6	6
93	2026/4/7 13:36:01	97秒	微信	N/A	223.104.195.103(山东-泰安)	176	2	1	1	1	4	2	1	3	1	1	1	6	6	6	6	6	6	5	6	5	6	6	5	6	6	4	5	6	4	4	5	5	6	5	7	6	5	5	6	5	6	5	6
94	2026/4/7 13:36:15	557秒	微信	N/A	223.99.163.166(山东-济南)	155	2	2	5	1	4	1	1	2	2	1	1	4	5	4	5	5	4	5	4	5	4	4	4	5	5	5	5	6	6	6	6	3	5	5	5	5	5	5	5	5	5	5	5
95	2026/4/7 13:37:33	131秒	微信	N/A	223.104.194.141(山东-济南)	139	1	1	1	1	2	3	2	3	2	1	1	6	5	5	6	4	3	4	5	3	4	5	4	3	4	5	4	5	4	5	4	3	4	5	4	5	4	5	4	4	5	4	4
96	2026/4/7 13:37:35	129秒	微信	N/A	112.53.79.14(山东-济南)	224	2	2	5	1	4	1	1	1	2	1	1	7	7	7	7	7	7	7	7	7	7	7	7	7	7	7	7	7	7	7	7	7	7	7	7	7	7	7	7	7	7	7	7
97	2026/4/7 13:38:07	186秒	微信	N/A	39.144.109.148(山东-聊城)	155	1	1	1	1	3	2	1	3	2	3	1	5	4	6	5	5	4	5	6	4	4	5	5	4	3	5	5	5	4	6	4	5	4	5	4	6	6	6	6	6	4	6	3
98	2026/4/7 13:39:01	135秒	微信	N/A	39.144.109.134(山东-聊城)	192	1	1	1	1	4	2	1	4	2	2	4	6	6	6	6	6	6	6	6	6	6	6	6	6	6	6	6	6	6	6	6	6	6	6	6	6	6	6	6	6	6	6	6
99	2026/4/7 13:39:13	74秒	微信	N/A	223.99.163.166(山东-济南)	128	1	2	3	1	4	1	1	5	2	2	1	4	4	4	4	4	4	4	4	4	4	4	4	4	4	4	4	4	4	4	4	4	4	4	4	4	4	4	4	4	4	4	4
100	2026/4/7 13:39:24	108秒	微信	N/A	39.144.108.85(山东-枣庄)	128	1	2	3	1	3	1	1	4	2	1	1	4	4	4	4	4	4	4	4	4	4	4	4	4	4	4	4	4	4	4	4	4	4	4	4	4	4	4	4	4	4	4	4
101	2026/4/7 13:39:33	86秒	微信	N/A	223.104.194.171(山东-济南)	224	1	1	1	1	4	1	1	2	1	1	1	7	7	7	7	7	7	7	7	7	7	7	7	7	7	7	7	7	7	7	7	7	7	7	7	7	7	7	7	7	7	7	7
102	2026/4/7 13:40:28	198秒	微信	N/A	39.144.109.174(山东-聊城)	157	2	2	3	1	2	2	2	1	1	1	1	5	3	3	5	3	3	3	3	5	4	5	4	6	4	5	6	6	5	5	7	5	5	6	5	5	5	4	7	6	6	6	7
103	2026/4/7 13:40:29	146秒	微信	N/A	112.224.224.141(山东-济南)	143	2	2	5	2	4	1	1	2	2	1	4	3	4	5	6	5	5	5	5	4	3	5	5	5	4	3	3	7	3	4	3	5	3	5	4	4	4	7	6	5	4	5	4
104	2026/4/7 13:43:06	365秒	微信	N/A	39.144.109.123(山东-聊城)	194	2	2	5	1	4	1	1	2	2	1	1	7	6	6	7	6	6	6	6	6	6	6	6	6	6	6	6	6	6	6	6	6	6	6	6	6	6	6	6	6	6	6	6
105	2026/4/7 13:43:30	107秒	微信	N/A	182.33.210.236(山东-潍坊)	224	1	2	5	1	3	2	2	4	2	3	1	7	7	7	7	7	7	7	7	7	7	7	7	7	7	7	7	7	7	7	7	7	7	7	7	7	7	7	7	7	7	7	7
106	2026/4/7 13:44:54	136秒	微信	N/A	112.224.220.2(山东-济南)	213	1	2	2	1	2	3	2	1	1	1	4	7	7	7	7	7	7	7	7	7	7	7	7	7	7	7	7	7	7	7	7	4	4	5	4	7	7	7	7	7	7	7	7
107	2026/4/7 13:45:02	444秒	微信	N/A	39.144.109.157(山东-聊城)	113	2	2	5	1	4	1	1	2	2	1	4	3	1	2	4	3	2	6	2	2	6	2	4	5	6	6	5	7	3	6	5	1	2	2	1	4	4	3	7	4	2	2	1
108	2026/4/7 13:45:17	489秒	微信	N/A	39.144.109.152(山东-聊城)	113	2	2	3	1	4	2	2	4	2	1	1	4	1	2	5	4	3	5	3	3	3	3	4	5	2	2	4	6	2	4	4	2	2	3	3	5	4	4	6	4	4	4	3
109	2026/4/7 13:45:25	184秒	微信	N/A	223.104.33.231(安徽-合肥)	134	2	1	2	2	4	1	1	2	2	2	1	4	3	5	5	4	4	5	5	3	4	5	5	3	3	3	4	4	4	4	3	3	4	3	5	5	5	5	5	4	5	5	5
110	2026/4/7 13:52:50	128秒	微信	N/A	39.144.109.178(山东-聊城)	192	2	1	5	1	4	1	2	1	1	1	1	6	6	6	6	6	6	6	6	6	6	6	6	6	6	6	6	6	6	6	6	6	6	6	6	6	6	6	6	6	6	6	6
111	2026/4/7 13:54:02	70秒	微信	N/A	112.232.163.251(山东-济南)	224	2	4	2	1	4	2	1	1	1	1	1	7	7	7	7	7	7	7	7	7	7	7	7	7	7	7	7	7	7	7	7	7	7	7	7	7	7	7	7	7	7	7	7
112	2026/4/7 13:54:09	201秒	微信	N/A	39.144.109.158(山东-聊城)	123	1	1	5	1	3	1	1	5	2	3	1	4	3	4	5	3	3	5	5	3	3	3	3	3	4	4	5	4	3	3	3	4	3	4	4	4	4	4	4	4	5	5	5
113	2026/4/7 13:54:28	248秒	微信	N/A	223.160.160.248(山东-济南)	138	1	1	5	1	4	1	2	1	1	2	1	5	4	4	4	3	5	5	3	4	5	5	5	4	3	5	5	6	2	1	4	5	5	5	5	6	3	5	3	6	3	5	5
114	2026/4/7 13:55:24	289秒	微信	N/A	223.99.163.166(山东-济南)	120	2	1	5	1	3	2	1	3	2	1	4	3	3	3	4	3	3	3	2	2	4	5	5	3	3	3	4	6	5	5	3	3	4	3	3	5	5	3	5	5	4	3	5
115	2026/4/7 13:56:26	355秒	微信	N/A	112.224.190.137(山东-济南)	120	1	1	2	1	3	1	2	5	2	1	1	3	3	3	5	3	3	4	5	5	5	5	4	3	3	3	4	7	3	3	2	2	3	3	3	4	4	5	5	4	4	4	3
116	2026/4/7 13:56:38	49秒	微信	N/A	112.224.221.105(山东-济南)	161	2	1	5	1	1	1	1	1	1	1	3	6	5	5	5	5	5	5	5	5	5	5	5	5	5	5	5	5	5	5	5	5	5	5	5	5	5	5	5	5	5	5	5
117	2026/4/7 14:00:33	909秒	微信	N/A	39.144.109.160(山东-聊城)	167	2	2	5	1	4	1	1	2	2	2	1	5	6	6	6	3	3	5	4	5	6	6	4	3	4	5	5	5	3	5	6	6	6	6	6	6	6	6	6	6	6	6	6
118	2026/4/7 14:03:11	175秒	微信	N/A	112.224.160.100(山东-济南)	128	1	2	3	1	4	1	1	4	2	2	1	4	4	4	4	4	4	4	4	4	4	4	4	4	4	4	4	4	4	4	4	4	4	4	4	4	4	4	4	4	4	4	4
119	2026/4/7 14:03:39	207秒	微信	N/A	112.224.163.41(山东-济南)	140	1	2	3	1	2	2	1	1	1	2	1	4	5	5	5	5	5	5	5	4	5	5	5	5	5	5	5	5	5	5	5	1	4	3	5	4	3	4	4	3	3	4	4
120	2026/4/7 14:06:59	213秒	微信	N/A	223.104.194.175(山东-济南)	81	1	2	3	1	2	1	1	5	2	3	1	1	1	7	7	7	7	7	7	7	1	1	1	1	1	1	1	4	2	1	1	1	1	4	1	1	1	1	1	1	1	1	1
121	2026/4/7 14:09:40	223秒	微信	N/A	39.144.109.166(山东-聊城)	123	2	1	5	1	2	2	1	3	2	1	1	2	6	4	6	6	6	6	7	4	6	6	2	2	2	2	3	3	1	4	2	2	7	2	7	2	2	4	4	2	2	7	2
122	2026/4/7 14:09:49	215秒	微信	N/A	39.144.108.47(山东-枣庄)	130	2	4	2	1	4	1	1	2	2	1	1	5	4	5	4	3	3	5	4	5	5	5	5	5	4	4	3	5	4	3	3	3	5	5	3	3	3	3	3	5	4	5	4
123	2026/4/7 14:12:33	131秒	微信	N/A	39.144.109.158(山东-聊城)	100	2	1	5	1	3	3	3	1	1	2	1	4	3	3	4	2	2	2	2	2	2	3	3	2	2	2	2	3	3	3	3	3	3	3	3	4	4	4	4	5	5	5	5
124	2026/4/7 14:14:52	77秒	微信	N/A	223.104.194.130(山东-济南)	128	1	2	5	1	3	1	1	5	2	3	4	4	4	4	4	4	4	4	4	4	4	4	4	4	4	4	4	4	4	4	4	4	4	4	4	4	4	4	4	4	4	4	4
125	2026/4/7 14:15:13	215秒	微信	N/A	144.12.49.180(山东-淄博)	132	2	2	1	1	4	1	1	1	1	2	1	5	5	5	5	4	4	4	4	4	4	4	4	4	4	4	4	4	4	4	4	4	4	4	4	4	4	4	4	4	4	4	4
126	2026/4/7 14:16:04	168秒	微信	N/A	218.58.41.25(山东-济南)	130	2	1	2	1	1	3	3	5	2	1	1	4	5	3	5	3	3	4	3	3	6	6	3	4	4	4	4	6	3	6	3	2	2	4	5	4	4	4	4	5	5	4	5
127	2026/4/7 14:17:01	191秒	微信	N/A	223.99.163.164(山东-济南)	224	1	1	1	1	4	1	1	3	2	2	3	7	7	7	7	7	7	7	7	7	7	7	7	7	7	7	7	7	7	7	7	7	7	7	7	7	7	7	7	7	7	7	7
128	2026/4/7 14:17:09	378秒	微信	N/A	223.99.163.164(山东-济南)	142	2	2	3	1	4	1	1	2	1	2	1	5	5	5	5	5	5	5	5	4	4	4	4	3	3	3	3	4	4	4	4	4	5	4	5	5	5	5	5	5	5	5	5
129	2026/4/7 14:18:10	158秒	微信	N/A	112.53.79.13(山东-济南)	114	2	1	3	1	4	1	1	1	1	2	4	5	3	4	5	3	3	4	3	2	4	4	3	2	3	3	4	3	4	4	5	3	5	3	4	3	3	3	4	4	3	4	4
130	2026/4/7 14:18:45	301秒	微信	N/A	112.53.79.13(山东-济南)	118	1	2	4	1	3	1	1	4	1	2	1	5	4	3	4	3	4	3	3	2	4	3	4	4	3	4	5	5	4	5	2	2	2	3	3	4	4	3	3	5	5	5	5
131	2026/4/7 14:20:09	101秒	微信	N/A	223.104.194.148(山东-济南)	160	1	3	1	1	2	3	1	1	1	2	1	5	5	5	5	5	5	5	5	5	5	5	5	5	5	5	5	5	5	5	5	5	5	5	5	5	5	5	5	5	5	5	5
132	2026/4/7 14:20:38	104秒	微信	N/A	39.144.109.172(山东-聊城)	169	1	3	1	1	2	3	2	2	2	1	2	5	3	6	5	5	6	5	6	5	4	6	5	6	5	5	5	6	5	6	6	5	5	6	5	5	6	6	5	5	6	5	5
133	2026/4/7 14:21:12	172秒	微信	N/A	112.224.162.32(山东-济南)	223	2	3	2	1	2	2	2	1	1	1	1	7	7	7	7	6	7	7	7	7	7	7	7	7	7	7	7	7	7	7	7	7	7	7	7	7	7	7	7	7	7	7	7
134	2026/4/7 14:21:40	105秒	微信	N/A	39.144.109.153(山东-聊城)	129	2	2	5	1	4	2	2	4	2	1	1	5	4	4	4	4	4	4	4	4	4	4	4	4	4	4	4	4	4	4	4	4	4	4	4	4	4	4	4	4	4	4	4
135	2026/4/7 14:21:56	78秒	微信	N/A	112.224.219.33(山东-济南)	224	1	1	1	1	2	3	3	1	1	1	1	7	7	7	7	7	7	7	7	7	7	7	7	7	7	7	7	7	7	7	7	7	7	7	7	7	7	7	7	7	7	7	7
136	2026/4/7 14:22:12	118秒	微信	N/A	112.224.191.236(山东-济南)	139	1	1	1	1	4	3	3	3	1	2	2	5	5	5	4	4	5	5	4	4	4	5	5	4	4	4	5	4	4	5	5	4	4	4	5	4	4	4	4	4	4	4	4
137	2026/4/7 14:22:18	249秒	微信	N/A	112.224.220.237(山东-济南)	194	2	2	3	1	2	3	3	1	1	1	2	7	6	5	6	6	6	6	6	6	6	6	6	6	6	6	6	7	6	6	5	6	6	4	6	7	7	7	7	6	6	6	6
138	2026/4/7 14:22:39	167秒	微信	N/A	223.104.194.142(山东-济南)	224	1	2	3	1	4	2	2	4	2	1	1	7	7	7	7	7	7	7	7	7	7	7	7	7	7	7	7	7	7	7	7	7	7	7	7	7	7	7	7	7	7	7	7
139	2026/4/7 14:23:33	208秒	微信	N/A	112.224.190.255(山东-济南)	128	2	2	2	1	4	1	1	5	2	2	1	4	4	4	4	5	3	4	4	4	4	4	4	4	4	4	4	4	4	4	4	4	4	4	4	4	4	4	4	4	4	4	4
140	2026/4/7 14:23:35	120秒	微信	N/A	223.104.194.154(山东-济南)	38	1	1	1	1	4	2	2	1	2	2	1	2	1	1	1	1	1	1	2	1	1	1	1	1	1	1	1	1	1	1	1	1	1	1	1	1	1	5	1	1	1	1	1
141	2026/4/7 14:23:38	73秒	微信	N/A	112.224.160.95(山东-济南)	224	2	2	2	1	4	2	2	3	2	2	1	7	7	7	7	7	7	7	7	7	7	7	7	7	7	7	7	7	7	7	7	7	7	7	7	7	7	7	7	7	7	7	7
142	2026/4/7 14:24:09	111秒	微信	N/A	112.232.212.209(山东-济南)	161	2	2	2	1	2	1	1	1	1	1	3	5	5	5	5	5	5	5	5	5	5	5	5	5	5	5	5	6	6	6	5	4	5	5	5	5	4	5	5	5	5	5	5
143	2026/4/7 14:24:52	61秒	微信	N/A	112.224.17.75(山东-济南)	128	2	2	2	1	2	3	3	2	1	1	1	4	4	4	4	4	4	4	4	4	4	4	4	4	4	4	4	4	4	4	4	4	4	4	4	4	4	4	4	4	4	4	4
144	2026/4/7 14:24:55	112秒	微信	N/A	112.224.218.55(山东-济南)	132	2	2	2	1	2	1	1	4	2	2	3	5	5	5	5	4	4	4	4	4	4	4	4	4	4	4	4	4	4	4	4	4	4	4	4	4	4	4	4	4	4	4	4
145	2026/4/7 14:25:07	153秒	微信	N/A	223.104.194.168(山东-济南)	125	2	2	2	1	4	2	4	2	2	1	1	4	3	4	4	3	3	4	4	4	5	4	4	5	4	3	4	5	4	4	3	4	5	3	4	4	4	4	4	4	4	3	4
146	2026/4/7 14:25:30	96秒	微信	N/A	223.99.163.165(山东-济南)	163	2	2	2	1	4	2	2	3	2	1	1	7	4	6	6	5	5	5	5	5	5	5	5	5	5	5	5	5	5	5	5	5	5	5	5	5	5	5	5	5	5	5	5
147	2026/4/7 14:25:34	70秒	微信	N/A	112.36.53.222(山东-德州)	224	2	2	5	1	3	2	2	2	2	1	1	7	7	7	7	7	7	7	7	7	7	7	7	7	7	7	7	7	7	7	7	7	7	7	7	7	7	7	7	7	7	7	7
148	2026/4/7 14:25:37	96秒	微信	N/A	112.224.141.153(山东-济南)	128	2	2	2	1	4	1	2	3	2	3	1	4	4	4	4	4	4	4	4	4	4	4	4	5	5	5	5	3	3	3	3	3	3	3	3	4	4	4	4	5	5	5	5
149	2026/4/7 14:26:02	113秒	微信	N/A	112.224.191.84(山东-济南)	57	2	2	5	2	4	1	1	4	2	3	4	1	1	1	4	1	1	1	1	1	1	1	1	5	5	5	5	5	1	1	1	1	1	1	1	2	1	2	1	1	1	1	1
150	2026/4/7 14:26:48	102秒	微信	N/A	223.99.163.166(山东-济南)	125	1	2	5	1	3	1	1	1	1	3	1	2	3	2	3	2	3	2	3	2	3	2	2	2	3	2	2	6	5	6	5	6	5	6	5	6	5	5	5	6	5	6	5
151	2026/4/7 14:26:50	283秒	微信	N/A	39.144.109.165(山东-聊城)	196	2	2	2	1	4	2	2	1	2	1	3	7	7	6	6	5	5	5	6	7	6	6	6	6	5	5	5	7	5	5	5	6	7	6	7	7	6	7	7	7	7	7	7
152	2026/4/7 14:27:01	158秒	微信	N/A	223.104.196.123(山东-济宁)	84	2	2	2	1	2	1	2	1	1	2	1	4	2	3	5	1	3	3	4	2	2	2	2	2	2	2	2	2	2	2	1	1	3	3	3	4	4	3	3	3	3	3	3
153	2026/4/7 14:27:02	62秒	微信	N/A	182.39.186.223(山东-枣庄)	192	2	2	2	1	4	2	1	1	1	1	3	6	6	6	6	6	6	6	6	6	6	6	6	6	6	6	6	6	6	6	6	6	6	6	6	6	6	6	6	6	6	6	6
154	2026/4/7 14:27:22	210秒	微信	N/A	223.104.194.99(山东-济南)	172	2	4	2	1	4	1	1	3	2	1	3	7	5	7	7	7	6	6	5	7	5	5	6	6	5	6	7	6	4	5	3	5	5	4	4	5	4	5	5	6	5	5	4
155	2026/4/7 14:27:33	62秒	微信	N/A	39.144.109.156(山东-聊城)	224	1	1	3	1	2	3	3	2	1	1	1	7	7	7	7	7	7	7	7	7	7	7	7	7	7	7	7	7	7	7	7	7	7	7	7	7	7	7	7	7	7	7	7
156	2026/4/7 14:27:45	65秒	微信	N/A	112.224.218.55(山东-济南)	112	2	2	2	1	4	1	1	4	2	2	3	3	3	3	3	3	3	3	3	3	3	3	3	3	3	3	3	4	4	4	4	4	4	4	4	4	4	4	4	4	4	4	4
157	2026/4/7 14:27:57	63秒	微信	N/A	39.144.109.170(山东-聊城)	187	2	2	2	1	4	1	1	1	1	1	1	6	5	7	5	6	5	6	5	6	6	6	6	6	6	6	6	6	6	6	6	6	6	6	6	6	6	7	6	4	6	6	5
158	2026/4/7 14:27:57	56秒	微信	N/A	39.144.109.162(山东-聊城)	224	2	2	2	1	2	2	2	1	2	1	1	7	7	7	7	7	7	7	7	7	7	7	7	7	7	7	7	7	7	7	7	7	7	7	7	7	7	7	7	7	7	7	7
159	2026/4/7 14:28:21	69秒	微信	N/A	111.15.38.198(山东-潍坊)	224	2	2	1	1	2	3	2	1	1	1	1	7	7	7	7	7	7	7	7	7	7	7	7	7	7	7	7	7	7	7	7	7	7	7	7	7	7	7	7	7	7	7	7
160	2026/4/7 14:28:22	68秒	微信	N/A	223.99.163.166(山东-济南)	224	1	2	1	1	4	1	1	2	2	2	4	7	7	7	7	7	7	7	7	7	7	7	7	7	7	7	7	7	7	7	7	7	7	7	7	7	7	7	7	7	7	7	7
161	2026/4/7 14:28:34	119秒	微信	N/A	39.144.109.174(山东-聊城)	154	2	2	2	1	2	3	3	1	1	1	3	5	5	5	5	5	5	6	5	5	5	5	5	5	4	3	5	5	4	4	4	3	6	5	5	5	4	4	6	6	5	5	5
162	2026/4/7 14:28:45	80秒	微信	N/A	39.144.109.177(山东-聊城)	96	1	2	1	1	4	1	1	3	2	3	4	3	3	3	3	3	3	3	3	3	3	3	3	3	3	3	3	3	3	3	3	3	3	3	3	3	3	3	3	3	3	3	3
163	2026/4/7 14:28:50	267秒	微信	N/A	39.144.109.173(山东-聊城)	187	2	2	5	1	2	2	2	3	2	1	1	6	5	6	7	6	6	6	6	6	5	6	6	6	5	5	6	6	6	6	6	5	6	5	6	6	6	6	6	6	6	6	6
164	2026/4/7 14:29:06	271秒	微信	N/A	112.232.212.39(山东-济南)	224	2	2	2	2	3	1	1	5	1	1	1	7	7	7	7	7	7	7	7	7	7	7	7	7	7	7	7	7	7	7	7	7	7	7	7	7	7	7	7	7	7	7	7
165	2026/4/7 14:29:30	76秒	微信	N/A	182.33.243.234(山东-潍坊)	128	2	2	2	1	2	1	1	2	2	3	1	4	4	4	4	4	4	4	4	4	4	4	4	4	4	4	4	4	4	4	4	4	4	4	4	4	4	4	4	4	4	4	4
166	2026/4/7 14:29:40	130秒	微信	N/A	112.53.79.13(山东-济南)	124	2	2	2	1	2	2	2	1	2	2	1	5	3	4	4	3	3	3	3	4	4	4	4	4	4	4	4	4	4	4	4	4	4	4	4	4	4	4	4	4	4	4	4
167	2026/4/7 14:29:42	61秒	微信	N/A	39.144.109.174(山东-聊城)	224	2	2	1	1	3	2	2	2	2	1	1	7	7	7	7	7	7	7	7	7	7	7	7	7	7	7	7	7	7	7	7	7	7	7	7	7	7	7	7	7	7	7	7
168	2026/4/7 14:30:14	1174秒	微信	N/A	113.121.222.1(山东-德州)	143	2	2	1	1	4	1	1	1	2	1	1	7	4	3	3	4	4	4	4	4	4	4	4	4	4	4	4	7	4	5	4	4	4	4	6	4	6	6	4	5	5	5	5
169	2026/4/7 14:30:59	102秒	微信	N/A	112.224.225.19(山东-济南)	96	2	2	2	1	4	1	1	3	2	2	1	3	3	3	3	3	3	3	3	3	3	3	3	3	3	3	3	3	3	3	3	3	3	3	3	3	3	3	3	3	3	3	3
170	2026/4/7 14:31:13	231秒	微信	N/A	112.232.212.50(山东-济南)	128	1	2	3	1	4	1	1	3	2	2	1	7	4	3	7	4	4	4	4	4	4	4	4	5	4	4	4	4	4	4	4	1	4	4	4	5	2	2	4	4	4	4	4
171	2026/4/7 14:31:21	182秒	微信	N/A	112.224.192.206(山东-济南)	122	2	2	1	1	4	1	1	1	2	2	3	5	4	4	4	5	3	4	4	5	4	4	5	3	3	3	4	6	4	4	2	3	3	4	4	4	4	4	6	2	2	2	4
172	2026/4/7 14:31:23	83秒	微信	N/A	112.224.163.240(山东-济南)	224	2	2	2	2	3	1	2	2	1	1	1	7	7	7	7	7	7	7	7	7	7	7	7	7	7	7	7	7	7	7	7	7	7	7	7	7	7	7	7	7	7	7	7
173	2026/4/7 14:31:42	265秒	微信	N/A	39.144.109.173(山东-聊城)	101	1	2	1	1	4	1	2	1	2	1	4	1	1	3	3	1	1	1	1	3	3	3	2	3	3	3	3	7	3	5	4	1	4	1	1	4	6	5	7	5	4	4	5
174	2026/4/7 14:32:01	58秒	微信	N/A	112.53.79.12(山东-济南)	96	1	2	2	1	4	2	1	5	2	2	1	3	3	3	3	3	3	3	3	3	3	3	3	3	3	3	3	3	3	3	3	3	3	3	3	3	3	3	3	3	3	3	3
175	2026/4/7 14:32:07	74秒	微信	N/A	223.104.194.177(山东-济南)	136	1	2	1	1	4	3	2	3	2	1	1	4	4	4	4	4	4	4	4	4	4	4	4	4	4	4	4	4	4	4	4	4	4	4	4	5	5	5	5	5	5	5	5
176	2026/4/7 14:32:21	77秒	微信	N/A	112.53.79.13(山东-济南)	160	1	1	1	1	4	1	1	1	1	2	4	5	5	5	5	5	5	5	5	5	5	5	5	5	5	5	5	5	5	5	5	5	5	5	5	5	5	5	5	5	5	5	5
177	2026/4/7 14:32:28	125秒	微信	N/A	112.53.79.13(山东-济南)	152	1	2	1	1	4	1	2	3	2	2	1	5	4	4	5	4	4	5	5	4	4	4	4	4	4	4	5	7	4	4	4	4	6	5	6	6	7	6	6	5	4	5	4
178	2026/4/7 14:32:28	238秒	微信	N/A	223.104.194.164(山东-济南)	106	2	2	1	1	4	1	1	2	2	1	1	5	2	2	4	2	3	5	2	2	4	3	4	3	4	4	4	4	3	4	3	1	4	5	5	4	4	5	6	1	1	2	1
179	2026/4/7 14:32:29	103秒	微信	N/A	218.58.41.183(山东-济南)	160	2	2	5	1	4	1	1	3	2	3	4	5	5	6	6	5	5	5	5	5	5	4	6	4	5	5	5	5	4	5	5	5	5	5	5	5	5	5	5	5	5	5	5
180	2026/4/7 14:33:00	258秒	微信	N/A	39.144.109.143(山东-聊城)	192	1	3	3	1	2	3	3	1	1	1	1	6	6	6	6	6	6	6	6	6	6	6	6	6	6	6	6	6	6	6	6	6	6	6	6	6	6	6	6	6	6	6	6
181	2026/4/7 14:33:17	77秒	微信	N/A	223.99.163.164(山东-济南)	128	2	3	2	1	2	2	2	1	1	2	1	4	4	4	4	4	4	4	4	4	4	4	4	4	4	4	4	4	4	4	4	4	4	4	4	4	4	4	4	4	4	4	4
182	2026/4/7 14:33:35	106秒	微信	N/A	112.53.79.12(山东-济南)	216	2	3	2	1	4	1	1	4	2	1	3	7	7	7	7	7	7	7	7	7	7	7	7	7	7	7	7	7	7	7	7	7	7	7	7	7	7	7	7	5	5	5	5
183	2026/4/7 14:33:38	54秒	微信	N/A	112.224.217.174(山东-济南)	96	2	2	2	1	4	1	1	1	1	3	1	3	3	3	3	3	3	3	3	3	3	3	3	3	3	3	3	3	3	3	3	3	3	3	3	3	3	3	3	3	3	3	3
184	2026/4/7 14:33:40	108秒	微信	N/A	113.126.66.247(山东-菏泽)	126	2	3	2	1	2	1	1	2	1	1	1	3	4	4	3	3	4	3	3	3	4	2	4	4	3	4	4	5	2	5	4	4	4	3	6	4	5	5	5	5	5	5	4
185	2026/4/7 14:33:40	102秒	微信	N/A	39.144.109.176(山东-聊城)	145	2	3	2	1	4	2	2	3	2	1	1	5	4	4	4	5	4	5	4	4	4	5	4	5	4	5	5	5	4	5	5	4	5	5	4	4	4	5	5	4	5	5	5
186	2026/4/7 14:33:56	62秒	微信	N/A	39.144.109.191(山东-聊城)	157	2	2	2	1	4	1	1	2	2	3	3	6	6	6	6	5	4	5	3	6	3	3	6	5	4	4	5	5	5	5	5	5	5	5	5	5	5	5	5	5	5	5	5
187	2026/4/7 14:34:03	124秒	微信	N/A	112.224.228.210(山东-济南)	155	2	2	2	1	3	1	1	2	2	1	1	6	6	5	3	4	4	4	6	4	5	5	5	4	4	4	4	6	5	5	4	4	6	5	6	5	5	5	6	6	4	6	4
188	2026/4/7 14:34:05	132秒	微信	N/A	39.144.109.150(山东-聊城)	96	1	1	1	1	2	3	3	4	2	1	1	3	3	3	3	3	2	2	5	3	3	3	3	3	3	3	3	3	3	3	3	3	3	3	3	3	3	3	3	3	3	3	3
189	2026/4/7 14:34:25	88秒	微信	N/A	39.144.109.173(山东-聊城)	224	1	1	1	1	2	1	1	3	2	3	1	7	7	7	7	7	7	7	7	7	7	7	7	7	7	7	7	7	7	7	7	7	7	7	7	7	7	7	7	7	7	7	7
190	2026/4/7 14:34:47	148秒	微信	N/A	112.224.221.94(山东-济南)	149	2	2	2	1	4	1	1	1	1	1	1	4	4	4	4	4	4	4	4	5	5	4	5	4	3	5	3	5	6	5	7	5	6	6	6	6	7	6	6	3	4	3	2
191	2026/4/7 14:35:00	145秒	微信	N/A	106.119.18.0(河北-石家庄)	224	2	2	2	2	2	1	1	2	2	1	1	7	7	7	7	7	7	7	7	7	7	7	7	7	7	7	7	7	7	7	7	7	7	7	7	7	7	7	7	7	7	7	7
192	2026/4/7 14:35:49	221秒	微信	N/A	39.144.108.9(山东-枣庄)	101	2	3	2	1	2	1	1	1	1	1	1	3	2	6	4	2	2	2	2	5	2	3	4	3	3	2	1	6	5	4	5	1	4	2	1	4	4	4	5	3	1	3	3
193	2026/4/7 14:36:58	299秒	微信	N/A	223.104.196.119(山东-济宁)	143	2	3	1	1	4	1	1	1	2	1	1	5	4	5	5	4	4	4	5	5	5	5	5	5	4	4	4	5	4	5	3	3	6	4	4	4	5	5	5	4	4	5	4
194	2026/4/7 14:38:01	259秒	微信	N/A	223.160.164.239(山东-济南)	136	2	2	5	1	4	1	1	2	2	2	1	7	5	6	7	4	3	3	3	3	3	4	5	4	4	4	4	7	4	4	3	3	3	3	4	5	4	5	6	4	4	4	4
195	2026/4/7 14:38:05	74秒	微信	N/A	112.224.141.159(山东-济南)	197	2	2	2	1	2	1	2	1	1	1	3	6	6	6	6	6	6	6	6	6	7	7	6	6	7	6	6	6	6	6	6	6	6	6	6	6	7	7	6	6	6	6	6
196	2026/4/7 14:39:06	71秒	微信	N/A	144.12.46.66(山东-淄博)	117	1	3	1	1	3	1	1	3	2	2	4	4	4	4	4	4	4	4	4	4	4	4	4	4	4	4	4	4	4	4	4	2	3	5	4	4	1	2	2	3	4	3	4
197	2026/4/7 14:39:17	102秒	微信	N/A	112.224.143.112(山东-济南)	153	2	2	5	2	4	3	1	1	2	1	1	5	4	4	4	5	5	5	5	4	4	4	4	5	5	5	5	5	5	5	5	5	5	5	5	5	5	5	5	5	5	5	5
198	2026/4/7 14:39:28	136秒	微信	N/A	111.14.233.139(山东-东营)	128	2	3	1	1	3	1	1	3	1	2	1	4	4	4	4	4	4	4	4	4	4	4	4	4	4	4	4	4	4	4	4	4	4	4	4	4	4	4	4	4	4	4	4
199	2026/4/7 14:39:30	87秒	微信	N/A	39.144.109.168(山东-聊城)	128	2	3	1	1	4	1	1	1	2	1	1	4	4	4	4	4	4	4	4	4	4	4	4	4	4	4	4	4	4	4	4	4	4	4	4	4	4	4	4	4	4	4	4
200	2026/4/7 14:39:49	108秒	微信	N/A	39.144.109.161(山东-聊城)	224	2	3	1	1	4	2	1	3	1	1	1	7	7	7	7	7	7	7	7	7	7	7	7	7	7	7	7	7	7	7	7	7	7	7	7	7	7	7	7	7	7	7	7
201	2026/4/7 14:39:59	116秒	微信	N/A	39.144.108.125(山东-枣庄)	126	2	3	1	1	4	1	1	1	2	1	1	4	3	4	4	4	3	4	4	4	3	4	3	4	3	4	3	4	5	4	5	4	5	4	5	4	3	4	3	4	5	4	5
202	2026/4/7 14:40:24	143秒	微信	N/A	144.12.233.114(山东-滨州)	128	2	3	1	2	2	1	2	2	1	1	1	4	4	4	4	4	4	4	4	4	4	4	4	4	4	4	4	4	4	4	4	4	4	4	4	4	4	4	4	4	4	4	4
203	2026/4/7 14:40:45	95秒	微信	N/A	144.12.37.141(山东-淄博)	120	2	2	5	1	4	1	1	1	2	2	1	4	4	3	5	3	4	3	3	4	3	3	3	4	4	4	4	5	5	3	4	4	4	3	4	4	5	3	4	4	4	3	3
204	2026/4/7 14:40:46	73秒	微信	N/A	112.230.183.195(山东-济南)	128	1	3	1	1	4	1	1	5	2	1	1	4	4	4	4	4	4	4	4	4	4	4	4	4	4	4	4	4	4	4	4	4	4	4	4	4	4	4	4	4	4	4	4
205	2026/4/7 14:41:18	59秒	微信	N/A	123.233.72.31(山东-济南)	128	1	3	1	1	2	3	3	1	1	2	1	4	4	4	4	4	4	4	4	4	4	4	4	4	4	4	4	4	4	4	4	4	4	4	4	4	4	4	4	4	4	4	4
206	2026/4/7 14:41:38	104秒	微信	N/A	223.104.194.184(山东-济南)	187	2	2	2	1	3	2	2	4	2	3	1	5	3	3	5	4	4	4	3	4	6	5	6	7	7	7	7	7	7	7	7	4	7	5	7	7	7	7	7	7	7	7	7
207	2026/4/7 14:42:13	89秒	微信	N/A	140.75.103.14(山东-青岛)	224	2	2	5	1	3	1	1	4	2	2	1	7	7	7	7	7	7	7	7	7	7	7	7	7	7	7	7	7	7	7	7	7	7	7	7	7	7	7	7	7	7	7	7
208	2026/4/7 14:42:33	230秒	微信	N/A	39.144.109.177(山东-聊城)	142	1	2	2	1	4	3	3	2	2	2	1	3	4	3	5	5	4	3	5	3	4	4	5	5	4	5	5	5	6	6	6	2	5	3	5	5	6	5	5	4	4	4	4
209	2026/4/7 14:42:51	170秒	微信	N/A	27.201.192.34(山东-泰安)	214	1	3	1	1	4	2	2	1	1	1	1	7	7	7	7	7	7	7	7	7	7	7	7	7	7	7	7	7	7	5	5	7	7	7	7	4	7	4	7	7	7	7	7
210	2026/4/7 14:43:02	181秒	微信	N/A	112.224.161.182(山东-济南)	109	1	3	1	1	4	1	1	1	2	2	1	5	5	4	5	4	4	4	4	1	1	1	1	1	1	1	1	6	4	6	4	3	3	3	3	3	5	5	5	4	4	4	4
211	2026/4/7 14:43:17	212秒	微信	N/A	223.104.194.124(山东-济南)	100	1	3	1	2	4	1	1	3	2	1	4	4	3	3	4	2	3	3	2	2	2	2	2	2	2	2	2	5	5	3	3	3	3	3	3	3	3	3	3	5	5	5	5
212	2026/4/7 14:43:17	279秒	微信	N/A	39.144.109.190(山东-聊城)	78	1	2	2	1	4	1	1	3	2	2	1	3	2	2	3	2	2	2	2	3	2	7	1	2	1	3	2	7	2	3	3	1	6	2	2	3	1	1	4	1	1	1	1
213	2026/4/7 14:43:20	180秒	微信	N/A	112.224.218.169(山东-济南)	186	2	2	2	1	3	1	1	2	2	1	1	6	5	6	6	5	5	5	6	6	6	6	6	6	6	6	6	6	5	6	6	5	6	6	6	6	6	6	6	6	6	6	6
214	2026/4/7 14:43:37	131秒	微信	N/A	223.104.194.178(山东-济南)	32	2	3	2	1	2	2	2	3	2	3	4	1	1	1	1	1	1	1	1	1	1	1	1	1	1	1	1	1	1	1	1	1	1	1	1	1	1	1	1	1	1	1	1
215	2026/4/7 14:43:39	134秒	微信	N/A	39.144.109.162(山东-聊城)	218	2	3	2	1	2	4	4	2	2	1	4	7	7	7	7	7	7	7	7	7	7	7	7	7	1	7	7	7	7	7	7	7	7	7	7	7	7	7	7	7	7	7	7
216	2026/4/7 14:44:09	167秒	微信	N/A	112.224.221.57(山东-济南)	196	2	2	2	1	4	1	1	1	2	1	1	6	6	6	6	6	6	6	6	6	6	6	6	6	6	6	6	6	6	6	6	6	6	6	6	7	7	7	7	6	6	6	6
217	2026/4/7 14:44:28	327秒	微信	N/A	112.224.226.150(山东-济南)	136	2	3	2	1	2	3	3	1	1	1	1	4	2	4	4	3	3	3	3	4	4	4	4	4	3	3	3	7	7	7	4	4	6	6	3	6	5	5	5	4	4	4	4
218	2026/4/7 14:44:35	79秒	微信	N/A	223.104.194.143(山东-济南)	224	2	2	5	1	4	2	1	4	1	1	1	7	7	7	7	7	7	7	7	7	7	7	7	7	7	7	7	7	7	7	7	7	7	7	7	7	7	7	7	7	7	7	7
219	2026/4/7 14:45:33	200秒	微信	N/A	112.224.190.102(山东-济南)	127	2	3	2	1	4	2	1	5	2	1	1	4	3	5	4	4	3	4	4	4	4	4	4	4	4	4	4	4	4	4	4	4	4	4	4	4	4	4	4	4	4	4	4
220	2026/4/7 14:46:46	117秒	微信	N/A	39.144.109.185(山东-聊城)	160	2	3	2	1	4	1	1	2	2	1	1	5	5	5	5	5	5	5	5	5	5	5	5	5	5	5	5	5	5	5	5	5	5	5	5	5	5	5	5	5	5	5	5
221	2026/4/7 14:47:20	82秒	微信	N/A	39.144.109.147(山东-聊城)	127	2	2	2	1	2	2	2	5	2	3	4	3	4	5	4	5	4	3	3	5	3	4	4	4	4	4	4	4	4	4	4	4	4	4	4	4	4	4	4	4	4	4	4
222	2026/4/7 14:47:39	123秒	微信	N/A	223.104.194.173(山东-济南)	87	2	2	2	1	2	3	3	1	2	1	3	2	4	2	5	3	6	5	2	3	2	3	4	2	3	3	3	2	3	2	2	2	2	2	2	2	2	2	2	2	3	3	2
223	2026/4/7 14:47:44	86秒	微信	N/A	112.224.220.220(山东-济南)	188	2	2	1	1	3	1	1	2	1	2	2	5	6	6	6	6	6	6	6	6	6	6	6	6	6	6	6	6	6	6	6	6	6	6	6	6	6	6	6	5	6	5	5
224	2026/4/7 14:47:46	133秒	微信	N/A	39.144.109.173(山东-聊城)	175	2	2	1	1	4	1	1	3	1	1	3	6	6	6	6	6	6	6	6	6	6	6	5	5	5	6	6	5	6	5	5	5	6	6	6	5	6	5	5	5	4	4	4
225	2026/4/7 14:48:09	456秒	微信	N/A	223.160.165.137(山东-济南)	176	2	3	2	1	2	1	1	1	2	1	4	7	1	7	7	5	4	4	4	5	4	4	5	5	6	5	4	6	6	4	4	5	6	5	7	7	7	7	7	7	7	7	7
226	2026/4/7 14:48:44	1544秒	微信	N/A	112.224.221.24(山东-济南)	224	2	2	2	1	2	1	1	1	1	1	1	7	7	7	7	7	7	7	7	7	7	7	7	7	7	7	7	7	7	7	7	7	7	7	7	7	7	7	7	7	7	7	7
227	2026/4/7 14:50:11	85秒	微信	N/A	39.144.111.96(山东-济南)	127	2	3	1	1	3	1	1	3	2	1	1	4	4	4	4	4	4	4	4	4	4	4	4	4	4	4	4	3	4	4	4	4	4	4	4	4	4	4	4	4	4	4	4
228	2026/4/7 14:50:42	105秒	微信	N/A	182.39.20.234(山东-济南)	84	1	1	1	2	4	1	1	5	2	1	4	1	1	1	1	1	1	1	1	1	1	1	1	3	2	4	2	6	4	4	3	2	3	2	2	5	5	5	5	4	3	4	4
229	2026/4/7 14:51:07	139秒	微信	N/A	112.224.163.194(山东-济南)	111	2	3	2	1	4	1	1	1	2	1	4	1	1	6	2	3	1	2	4	5	3	3	3	2	2	2	4	5	5	5	4	4	4	4	4	4	4	4	4	4	4	4	4
230	2026/4/7 14:51:31	171秒	微信	N/A	112.224.191.132(山东-济南)	181	1	2	1	1	2	1	1	2	1	1	2	5	6	6	6	6	6	5	6	7	6	5	4	6	6	5	6	6	6	5	5	6	6	5	5	7	7	7	7	4	4	6	4
231	2026/4/7 14:52:49	66秒	微信	N/A	223.99.163.165(山东-济南)	128	1	2	2	1	3	1	1	1	2	1	1	4	4	4	4	4	4	4	4	4	4	4	4	4	4	4	4	4	4	4	4	4	4	4	4	4	4	4	4	4	4	4	4
232	2026/4/7 14:52:59	52秒	微信	N/A	112.9.126.10(山东-青岛)	224	2	1	5	1	1	2	2	2	1	1	4	7	7	7	7	7	7	7	7	7	7	7	7	7	7	7	7	7	7	7	7	7	7	7	7	7	7	7	7	7	7	7	7
233	2026/4/7 14:53:20	71秒	微信	N/A	112.224.223.182(山东-济南)	160	2	1	2	1	1	3	2	3	2	1	1	5	5	5	5	5	5	5	5	5	5	5	5	5	5	5	5	5	5	5	5	5	5	5	5	5	5	5	5	5	5	5	5
234	2026/4/7 14:53:22	119秒	微信	N/A	112.224.225.96(山东-济南)	64	2	2	5	1	4	3	3	1	2	2	4	2	2	2	2	2	2	2	2	2	2	2	2	2	2	2	2	2	2	2	2	2	2	2	2	2	2	2	2	2	2	2	2
235	2026/4/7 14:53:29	90秒	微信	N/A	112.53.79.12(山东-济南)	157	2	1	3	1	1	1	1	3	2	3	1	6	6	6	6	6	6	6	6	5	5	5	5	4	4	4	4	5	5	5	5	5	5	5	5	4	4	4	4	4	5	4	4
236	2026/4/7 14:53:34	125秒	微信	N/A	112.224.224.242(山东-济南)	192	2	1	2	1	3	3	3	2	1	2	1	6	6	6	6	6	6	6	6	6	6	6	6	6	6	6	6	6	6	6	6	6	6	6	6	6	6	6	6	6	6	6	6
237	2026/4/7 14:53:46	73秒	微信	N/A	182.39.33.71(山东-济南)	128	1	1	3	1	4	1	1	1	1	1	1	4	4	4	4	4	4	4	4	4	4	4	4	4	4	4	4	4	4	4	4	4	4	4	4	4	4	4	4	4	4	4	4
238	2026/4/7 14:54:04	138秒	微信	N/A	112.224.222.159(山东-济南)	172	2	1	5	1	2	3	3	3	2	1	1	5	5	5	5	5	6	5	6	6	5	6	5	5	6	5	5	5	5	6	5	6	5	6	5	6	5	6	5	6	5	6	5
239	2026/4/7 14:54:06	147秒	微信	N/A	39.144.109.185(山东-聊城)	224	2	1	1	1	4	1	1	3	2	1	4	7	7	7	7	7	7	7	7	7	7	7	7	7	7	7	7	7	7	7	7	7	7	7	7	7	7	7	7	7	7	7	7
240	2026/4/7 14:54:12	83秒	微信	N/A	112.53.79.14(山东-济南)	128	1	2	2	1	2	2	2	3	1	1	4	4	4	4	4	4	4	4	4	4	4	4	4	4	4	4	4	4	4	4	4	4	4	4	4	4	4	4	4	4	4	4	4
241	2026/4/7 14:54:22	128秒	微信	N/A	223.104.194.159(山东-济南)	224	1	1	2	1	2	3	3	1	1	1	1	7	7	7	7	7	7	7	7	7	7	7	7	7	7	7	7	7	7	7	7	7	7	7	7	7	7	7	7	7	7	7	7
242	2026/4/7 14:54:43	160秒	微信	N/A	112.224.225.91(山东-济南)	97	2	1	1	1	2	1	2	1	1	1	1	3	3	3	4	3	3	3	3	3	3	3	3	3	3	3	3	3	3	3	3	3	3	3	3	3	3	3	3	3	3	3	3
243	2026/4/7 14:54:48	163秒	微信	N/A	223.99.163.166(山东-济南)	160	2	1	2	1	4	1	2	2	2	1	1	3	3	7	5	6	6	5	5	6	6	5	5	4	5	4	4	5	4	4	4	4	6	5	5	5	5	5	6	6	6	6	5
244	2026/4/7 14:54:50	102秒	微信	N/A	182.33.149.159(山东-潍坊)	160	2	1	2	1	2	3	1	3	2	1	1	5	5	5	5	5	5	5	5	5	5	5	5	5	5	5	5	5	5	5	5	5	5	5	5	5	5	5	5	5	5	5	5
245	2026/4/7 14:55:08	87秒	微信	N/A	112.230.183.11(山东-济南)	221	2	1	5	1	2	1	1	3	1	1	1	7	4	7	7	7	7	7	7	7	7	7	7	7	7	7	7	7	7	7	7	7	7	7	7	7	7	7	7	7	7	7	7
246	2026/4/7 14:55:10	186秒	微信	N/A	223.104.194.181(山东-济南)	163	2	1	2	1	2	3	3	2	2	1	3	7	6	6	6	5	2	6	5	4	5	5	5	5	4	5	5	5	5	5	4	4	6	5	5	4	5	6	6	6	6	6	4
247	2026/4/7 14:55:25	181秒	微信	N/A	112.53.79.14(山东-济南)	143	2	1	2	1	4	1	1	1	2	1	4	4	1	5	5	3	3	4	4	5	5	4	5	5	5	4	5	7	5	4	4	1	5	3	4	5	5	7	7	5	4	5	5
248	2026/4/7 14:55:27	198秒	微信	N/A	112.53.79.12(山东-济南)	135	2	1	2	1	2	2	2	3	2	2	1	6	3	5	4	3	4	4	3	3	4	4	5	5	4	4	5	5	4	3	3	3	4	3	4	5	7	6	6	5	4	4	3
249	2026/4/7 14:55:50	51秒	微信	N/A	39.144.109.131(山东-聊城)	224	1	1	3	1	2	2	2	5	2	1	1	7	7	7	7	7	7	7	7	7	7	7	7	7	7	7	7	7	7	7	7	7	7	7	7	7	7	7	7	7	7	7	7
250	2026/4/7 14:55:52	109秒	微信	N/A	39.144.109.150(山东-聊城)	181	2	3	5	1	2	2	2	1	1	1	1	7	6	6	6	6	6	6	6	5	5	5	5	5	5	5	5	5	5	5	5	6	6	6	6	6	6	6	6	6	6	6	6
251	2026/4/7 14:55:59	232秒	微信	N/A	39.144.109.188(山东-聊城)	126	2	1	5	1	2	1	1	1	2	1	4	5	2	5	4	4	4	4	4	4	4	4	4	4	4	4	4	4	4	4	4	2	4	4	4	4	4	4	4	4	4	4	4
252	2026/4/7 14:56:01	69秒	微信	N/A	112.53.79.12(山东-济南)	224	2	1	3	1	3	2	2	2	1	1	1	7	7	7	7	7	7	7	7	7	7	7	7	7	7	7	7	7	7	7	7	7	7	7	7	7	7	7	7	7	7	7	7
253	2026/4/7 14:56:04	230秒	微信	N/A	39.144.109.182(山东-聊城)	155	2	1	2	1	3	1	1	4	2	1	1	5	5	6	6	4	3	5	3	5	4	6	5	5	6	5	5	4	4	5	3	2	5	5	5	5	5	5	7	6	5	6	5
254	2026/4/7 14:56:16	114秒	微信	N/A	223.104.194.182(山东-济南)	164	2	1	2	1	2	4	1	1	1	1	2	6	6	6	6	5	5	5	5	5	5	5	5	5	5	5	5	5	5	5	5	5	5	5	5	5	5	5	5	5	5	5	5
255	2026/4/7 14:56:17	90秒	微信	N/A	39.144.109.160(山东-聊城)	129	2	1	5	1	4	2	2	5	2	1	1	4	4	4	5	3	4	5	4	4	4	4	4	4	4	4	4	4	4	4	4	4	4	4	4	4	4	4	4	4	4	4	4
256	2026/4/7 14:56:21	72秒	微信	N/A	39.144.109.168(山东-聊城)	200	2	1	3	1	2	3	3	4	2	1	1	6	6	6	6	7	7	7	7	7	7	7	7	6	6	6	6	6	6	6	6	6	6	6	6	6	6	6	6	6	6	6	6
257	2026/4/7 14:56:37	275秒	微信	N/A	112.53.79.12(山东-济南)	137	2	1	5	1	2	2	1	2	1	1	1	4	4	5	5	5	4	4	4	4	4	4	4	4	4	4	6	5	5	5	5	4	4	4	4	4	4	4	4	4	4	4	4
258	2026/4/7 14:56:37	59秒	微信	N/A	112.224.141.77(山东-济南)	224	1	1	3	2	2	2	2	2	1	1	1	7	7	7	7	7	7	7	7	7	7	7	7	7	7	7	7	7	7	7	7	7	7	7	7	7	7	7	7	7	7	7	7
259	2026/4/7 14:56:43	120秒	微信	N/A	112.224.143.135(山东-济南)	128	2	1	3	1	3	2	1	4	2	2	1	4	4	4	4	4	4	4	4	4	4	4	4	4	4	4	4	4	4	4	4	4	4	4	4	4	4	4	4	4	4	4	4
260	2026/4/7 14:56:58	310秒	微信	N/A	223.99.163.165(山东-济南)	143	2	3	2	1	4	1	1	3	2	2	4	5	3	6	4	3	4	5	5	5	3	5	6	4	4	4	4	6	3	5	4	3	5	4	5	5	5	5	5	5	4	5	4
261	2026/4/7 14:57:01	80秒	微信	N/A	223.104.194.185(山东-济南)	139	2	1	3	1	4	1	1	3	2	1	4	6	6	5	6	6	5	4	4	4	4	4	4	4	4	4	4	4	4	4	4	4	4	4	4	4	4	4	4	4	5	4	4
262	2026/4/7 14:57:25	132秒	微信	N/A	223.104.194.169(山东-济南)	114	2	1	3	1	4	2	1	3	2	2	4	3	3	3	3	3	3	3	3	3	3	3	3	3	3	4	4	4	4	4	4	4	4	4	4	4	4	4	4	4	4	4	4
263	2026/4/7 14:57:40	147秒	微信	N/A	223.99.163.164(山东-济南)	168	1	1	2	1	4	1	1	4	1	1	1	6	6	6	6	6	6	6	6	6	6	6	6	4	4	4	4	4	4	4	4	4	4	4	4	6	6	6	6	6	6	6	6
264	2026/4/7 14:57:42	335秒	微信	N/A	112.232.212.1(山东-济南)	157	2	1	2	1	2	2	1	4	1	1	4	4	4	5	6	5	5	6	5	4	4	5	6	5	5	5	5	6	4	4	6	3	6	3	3	5	7	6	6	4	5	5	5
265	2026/4/7 14:57:53	49秒	微信	N/A	223.99.163.166(山东-济南)	154	1	4	1	1	4	4	3	3	1	2	1	2	3	6	2	5	5	5	4	5	5	5	5	5	3	5	5	5	4	5	5	4	4	4	5	7	5	5	7	6	6	6	6
266	2026/4/7 14:58:04	110秒	微信	N/A	112.224.226.134(山东-济南)	128	2	1	1	1	4	1	1	3	1	1	1	4	4	4	4	4	4	4	4	4	4	4	4	4	4	4	4	4	4	4	4	4	4	4	4	4	4	4	4	4	4	4	4
267	2026/4/7 14:58:11	95秒	微信	N/A	39.144.109.183(山东-聊城)	131	2	1	1	1	4	1	1	1	2	1	1	5	5	5	5	4	3	4	4	4	4	4	4	4	4	4	4	4	4	4	4	4	4	4	4	4	4	4	4	4	4	4	4
268	2026/4/7 14:58:33	161秒	微信	N/A	39.144.109.134(山东-聊城)	156	1	1	3	1	4	1	1	5	2	1	1	6	6	6	6	5	5	5	5	5	5	5	5	5	5	5	5	5	6	5	5	6	6	6	5	2	2	2	2	5	5	5	5
269	2026/4/7 14:58:37	146秒	微信	N/A	112.224.222.245(山东-济南)	128	2	1	1	1	2	2	2	2	2	2	2	4	4	4	4	4	4	4	4	4	4	4	4	4	4	4	4	4	4	4	4	4	4	4	4	4	4	4	4	4	4	4	4
270	2026/4/7 14:58:58	165秒	微信	N/A	223.160.160.163(山东-济南)	192	2	1	3	1	4	1	1	1	2	1	1	7	7	7	7	7	7	7	7	7	7	6	5	5	4	5	5	5	6	6	5	5	5	6	7	6	6	6	6	6	6	5	6
271	2026/4/7 14:59:23	94秒	微信	N/A	223.99.163.165(山东-济南)	128	1	1	1	1	4	2	1	4	2	1	1	4	4	4	4	4	4	4	4	4	4	4	4	4	4	4	4	4	4	4	4	4	4	4	4	4	4	4	4	4	4	4	4
272	2026/4/7 14:59:36	159秒	微信	N/A	39.144.109.179(山东-聊城)	109	2	1	2	1	4	1	1	3	2	1	4	2	2	5	3	2	2	4	3	2	5	3	6	5	4	3	2	5	5	5	1	2	2	2	2	5	5	5	5	5	3	2	2
273	2026/4/7 14:59:37	85秒	微信	N/A	223.99.163.164(山东-济南)	121	2	1	1	1	3	1	1	2	2	1	1	6	2	2	4	3	3	3	3	3	4	4	3	5	4	4	4	4	4	4	4	4	4	4	4	4	4	4	4	4	4	4	4
274	2026/4/7 14:59:38	159秒	微信	N/A	39.144.109.172(山东-聊城)	97	1	1	1	1	4	3	3	3	2	2	4	4	3	3	3	3	3	3	3	3	3	3	3	3	3	3	3	3	3	3	3	3	3	3	3	3	3	3	3	3	3	3	3
275	2026/4/7 14:59:44	51秒	微信	N/A	39.144.109.183(山东-聊城)	224	1	1	1	1	1	4	4	1	1	1	3	7	7	7	7	7	7	7	7	7	7	7	7	7	7	7	7	7	7	7	7	7	7	7	7	7	7	7	7	7	7	7	7
276	2026/4/7 14:59:48	296秒	微信	N/A	112.230.183.56(山东-济南)	138	2	1	3	1	4	1	1	4	2	2	1	5	5	5	5	5	5	6	5	4	4	5	3	6	6	6	5	6	2	2	3	1	3	2	5	3	5	3	6	5	4	5	3
277	2026/4/7 14:59:52	49秒	微信	N/A	223.160.160.60(山东-济南)	224	1	1	1	2	1	3	2	4	2	3	4	7	7	7	7	7	7	7	7	7	7	7	7	7	7	7	7	7	7	7	7	7	7	7	7	7	7	7	7	7	7	7	7
278	2026/4/7 15:00:02	135秒	微信	N/A	223.104.194.182(山东-济南)	192	2	1	3	1	4	1	1	2	1	1	1	6	6	6	6	6	6	6	6	6	6	6	6	6	6	6	6	6	6	6	6	6	6	6	6	6	6	6	6	6	6	6	6
279	2026/4/7 15:00:20	73秒	微信	N/A	112.224.190.178(山东-济南)	224	1	1	1	1	1	4	4	1	1	1	1	7	7	7	7	7	7	7	7	7	7	7	7	7	7	7	7	7	7	7	7	7	7	7	7	7	7	7	7	7	7	7	7
280	2026/4/7 15:00:37	78秒	微信	N/A	123.233.72.51(山东-济南)	108	1	1	1	1	4	1	1	5	2	3	4	1	1	3	3	3	3	3	3	3	3	3	3	3	3	3	3	3	3	3	3	5	5	5	5	3	4	4	4	5	4	4	4
281	2026/4/7 15:01:11	126秒	微信	N/A	112.232.212.83(山东-济南)	129	1	2	1	1	2	1	1	3	2	2	1	4	4	4	4	4	4	4	4	5	4	4	4	4	4	4	4	4	4	4	4	4	4	4	4	4	4	4	4	4	4	4	4
282	2026/4/7 15:01:26	63秒	微信	N/A	223.104.194.178(山东-济南)	120	2	1	2	1	2	1	1	1	1	1	1	6	6	6	3	5	3	5	3	5	2	5	2	2	5	2	5	2	5	2	5	2	5	3	5	2	3	5	2	2	5	5	2
283	2026/4/7 15:01:37	97秒	微信	N/A	39.144.109.164(山东-聊城)	127	2	1	2	1	4	1	1	3	2	3	1	4	3	4	4	4	4	4	4	4	4	4	4	4	4	4	4	4	4	4	4	4	4	4	4	4	4	4	4	4	4	4	4
284	2026/4/7 15:01:46	103秒	微信	N/A	112.53.79.14(山东-济南)	192	2	1	2	1	3	2	2	1	1	2	1	6	6	6	6	6	6	6	6	6	6	6	6	6	6	6	6	6	6	6	6	6	6	6	6	6	6	6	6	6	6	6	6
285	2026/4/7 15:01:47	78秒	微信	N/A	112.224.190.2(山东-济南)	224	2	1	2	1	4	1	1	1	2	1	3	7	7	7	7	7	7	7	7	7	7	7	7	7	7	7	7	7	7	7	7	7	7	7	7	7	7	7	7	7	7	7	7
286	2026/4/7 15:02:07	84秒	微信	N/A	39.144.111.143(山东-济南)	160	2	2	1	1	4	1	1	1	1	2	1	5	5	5	5	5	5	5	5	5	5	5	5	5	5	5	5	5	5	5	5	5	5	5	5	5	5	5	5	5	5	5	5
287	2026/4/7 15:02:11	92秒	微信	N/A	39.144.109.162(山东-聊城)	170	2	1	2	1	2	2	2	2	1	1	4	7	7	7	7	7	7	7	7	7	7	7	7	4	4	4	4	4	5	5	3	5	4	3	5	5	4	4	5	5	3	5	5
288	2026/4/7 15:02:12	79秒	微信	N/A	223.104.194.166(山东-济南)	160	2	1	5	1	4	1	1	2	2	2	1	5	5	5	5	5	5	5	5	5	5	5	5	5	5	5	5	5	5	5	5	5	5	5	5	5	5	5	5	5	5	5	5
289	2026/4/7 15:02:25	131秒	微信	N/A	223.99.163.165(山东-济南)	148	1	1	2	1	4	2	1	4	2	2	1	4	4	5	5	5	5	4	4	5	5	5	4	5	4	5	4	5	4	4	4	5	5	5	5	5	5	5	5	5	5	3	5
290	2026/4/7 15:02:30	74秒	微信	N/A	182.39.157.208(山东-枣庄)	166	2	3	3	1	2	2	2	2	2	2	2	6	6	6	6	5	6	5	6	6	6	5	6	5	5	5	5	5	6	5	5	5	5	5	4	4	5	5	4	4	5	5	5
291	2026/4/7 15:02:31	115秒	微信	N/A	223.104.194.177(山东-济南)	213	2	1	2	1	4	1	1	1	1	1	1	7	7	7	7	5	7	7	7	6	6	7	7	7	7	5	6	6	7	7	7	7	7	7	7	7	7	7	6	6	6	7	7
292	2026/4/7 15:02:35	68秒	微信	N/A	39.144.109.130(山东-聊城)	224	2	2	2	2	2	4	2	2	2	2	2	7	7	7	7	7	7	7	7	7	7	7	7	7	7	7	7	7	7	7	7	7	7	7	7	7	7	7	7	7	7	7	7
293	2026/4/7 15:02:39	91秒	微信	N/A	112.224.221.106(山东-济南)	93	1	1	2	1	2	1	2	4	1	2	1	1	5	4	1	4	1	1	5	1	5	5	4	1	1	5	5	1	5	5	5	5	1	5	1	1	5	5	1	1	1	1	1
294	2026/4/7 15:02:40	5176秒	微信	N/A	112.224.143.10(山东-济南)	134	1	2	5	2	2	2	1	5	2	2	4	5	5	4	5	4	5	4	5	4	4	5	4	4	5	4	5	4	3	5	4	4	5	3	5	3	5	4	3	3	4	3	4
295	2026/4/7 15:02:40	122秒	微信	N/A	39.144.109.139(山东-聊城)	224	1	1	2	1	4	1	1	3	2	1	1	7	7	7	7	7	7	7	7	7	7	7	7	7	7	7	7	7	7	7	7	7	7	7	7	7	7	7	7	7	7	7	7
296	2026/4/7 15:02:44	88秒	微信	N/A	223.104.194.137(山东-济南)	197	2	1	3	1	2	2	2	3	2	1	1	7	5	4	6	6	6	5	7	7	7	5	6	7	6	5	7	7	6	6	7	7	6	5	7	6	7	6	7	7	5	6	6
297	2026/4/7 15:02:45	91秒	微信	N/A	39.144.109.176(山东-聊城)	128	2	3	3	1	4	1	3	4	1	2	3	4	4	4	4	4	4	4	4	4	4	4	4	4	4	4	4	4	4	4	4	4	4	4	4	4	4	4	4	4	4	4	4
298	2026/4/7 15:02:48	117秒	微信	N/A	39.144.109.77(山东-聊城)	160	2	1	2	1	2	2	3	3	2	1	1	5	5	5	5	5	5	5	5	5	5	5	5	5	5	5	5	5	5	5	5	5	5	5	5	5	5	5	5	5	5	5	5
299	2026/4/7 15:02:48	84秒	微信	N/A	39.144.109.161(山东-聊城)	86	1	1	1	1	4	1	1	2	2	3	4	2	2	2	2	2	2	2	2	2	2	2	2	2	2	2	2	3	3	3	3	3	3	3	3	3	3	4	4	4	4	4	4
300	2026/4/7 15:03:02	106秒	微信	N/A	112.53.79.11(山东-济南)	77	1	1	5	1	4	1	1	4	2	2	1	1	1	1	1	1	1	3	1	1	1	1	1	3	5	3	4	3	4	3	4	3	4	3	2	1	3	1	4	1	6	1	5
301	2026/4/7 15:03:03	96秒	微信	N/A	223.104.194.171(山东-济南)	110	2	1	3	1	2	1	1	1	1	1	1	4	4	3	3	3	3	3	4	3	3	3	3	3	3	3	3	3	3	3	3	3	4	4	4	4	4	4	4	4	4	4	4
302	2026/4/7 15:03:12	233秒	微信	N/A	120.225.186.32(山东-济宁)	224	1	1	2	1	2	3	3	1	1	1	1	7	7	7	7	7	7	7	7	7	7	7	7	7	7	7	7	7	7	7	7	7	7	7	7	7	7	7	7	7	7	7	7
303	2026/4/7 15:03:26	188秒	微信	N/A	112.53.79.11(山东-济南)	32	1	1	2	1	4	2	1	5	2	3	4	1	1	1	1	1	1	1	1	1	1	1	1	1	1	1	1	1	1	1	1	1	1	1	1	1	1	1	1	1	1	1	1
304	2026/4/7 15:03:28	154秒	微信	N/A	112.224.227.156(山东-济南)	164	2	1	2	1	2	2	2	3	1	1	1	6	6	6	6	5	5	5	5	5	5	5	5	5	5	5	5	5	5	5	5	5	5	5	5	5	5	5	5	5	5	5	5
305	2026/4/7 15:03:35	89秒	微信	N/A	39.144.109.129(山东-聊城)	143	2	1	2	1	4	1	1	2	1	1	4	3	5	5	4	5	4	4	5	5	5	3	5	5	3	5	3	5	3	4	5	4	5	6	5	4	5	5	4	5	4	5	5
306	2026/4/7 15:03:35	89秒	微信	N/A	39.144.109.138(山东-聊城)	128	2	3	3	1	4	1	1	2	1	1	3	4	4	4	4	4	4	4	4	4	4	4	4	4	4	4	4	4	4	4	4	4	4	4	4	4	4	4	4	4	4	4	4
307	2026/4/7 15:03:45	82秒	微信	N/A	39.144.109.176(山东-聊城)	224	2	3	3	1	2	1	2	1	2	1	3	7	7	7	7	7	7	7	7	7	7	7	7	7	7	7	7	7	7	7	7	7	7	7	7	7	7	7	7	7	7	7	7
308	2026/4/7 15:03:46	149秒	微信	N/A	39.144.109.14(山东-聊城)	97	2	3	3	1	2	3	1	5	1	2	3	3	4	3	3	3	3	3	3	3	3	3	3	3	3	3	2	5	4	4	2	1	2	3	3	4	3	4	3	2	3	3	3
309	2026/4/7 15:03:46	74秒	微信	N/A	39.144.109.140(山东-聊城)	160	1	1	3	1	4	2	1	5	2	2	3	5	5	5	5	5	5	5	5	5	5	5	5	5	5	5	5	5	5	5	5	5	5	5	5	5	5	5	5	5	5	5	5
310	2026/4/7 15:03:47	104秒	微信	N/A	112.224.217.110(山东-济南)	154	2	3	3	1	2	3	3	1	1	2	1	5	5	5	5	5	4	5	5	5	4	5	5	5	4	5	5	5	4	5	5	5	4	5	5	5	4	5	5	6	4	5	5
311	2026/4/7 15:03:52	58秒	微信	N/A	144.12.243.254(山东-烟台)	224	2	1	5	2	2	2	3	1	1	1	4	7	7	7	7	7	7	7	7	7	7	7	7	7	7	7	7	7	7	7	7	7	7	7	7	7	7	7	7	7	7	7	7
312	2026/4/7 15:03:57	139秒	微信	N/A	112.224.160.225(山东-济南)	151	1	2	3	1	4	1	1	5	2	2	1	6	4	6	7	4	6	5	5	5	5	5	4	6	5	4	4	4	5	4	4	5	4	4	5	5	4	5	4	4	5	4	4
313	2026/4/7 15:03:58	241秒	微信	N/A	223.99.163.165(山东-济南)	224	2	1	2	1	3	2	2	1	2	1	1	7	7	7	7	7	7	7	7	7	7	7	7	7	7	7	7	7	7	7	7	7	7	7	7	7	7	7	7	7	7	7	7
314	2026/4/7 15:04:04	53秒	微信	N/A	223.104.194.185(山东-济南)	128	1	1	3	1	2	2	2	5	2	3	4	4	4	4	4	4	4	4	4	4	4	4	4	4	4	4	4	4	4	4	4	4	4	4	4	4	4	4	4	4	4	4	4
315	2026/4/7 15:04:05	162秒	微信	N/A	112.224.190.34(山东-济南)	206	2	3	3	1	4	1	1	5	2	3	4	7	7	7	7	7	7	7	7	7	7	7	7	7	7	7	7	7	7	7	7	1	7	1	1	7	7	7	7	7	7	7	7
316	2026/4/7 15:04:07	189秒	微信	N/A	223.104.196.101(山东-济宁)	132	2	1	2	1	4	2	1	1	2	1	1	4	3	5	5	5	4	4	5	5	4	4	4	4	4	4	4	4	4	4	4	4	4	4	4	4	4	4	4	4	4	4	4
317	2026/4/7 15:04:10	117秒	微信	N/A	223.160.165.190(山东-济南)	81	1	1	5	1	4	1	1	5	2	3	4	1	1	3	1	3	3	3	3	1	3	3	3	3	3	3	3	3	1	2	3	3	3	1	1	3	3	3	3	3	3	3	3
318	2026/4/7 15:04:35	99秒	微信	N/A	223.104.194.190(山东-济南)	224	1	1	2	1	2	3	2	3	1	2	2	7	7	7	7	7	7	7	7	7	7	7	7	7	7	7	7	7	7	7	7	7	7	7	7	7	7	7	7	7	7	7	7
319	2026/4/7 15:04:45	299秒	微信	N/A	223.104.194.113(山东-济南)	160	2	1	2	1	2	2	2	5	2	1	2	5	5	5	5	5	5	5	5	4	5	5	5	5	5	5	5	6	5	5	5	5	5	5	5	5	5	5	5	5	5	5	5
320	2026/4/7 15:04:51	117秒	微信	N/A	223.99.163.166(山东-济南)	99	2	1	2	1	3	1	1	5	2	2	4	4	2	4	4	4	3	3	3	3	3	3	3	3	3	3	3	3	3	3	3	3	3	3	3	3	3	3	3	3	3	3	3
321	2026/4/7 15:04:52	265秒	微信	N/A	223.99.163.166(山东-济南)	217	1	1	2	1	2	2	2	4	2	1	3	6	6	7	7	7	7	6	7	7	7	7	7	7	7	6	7	7	7	6	7	7	6	7	7	7	7	7	7	7	7	6	7
322	2026/4/7 15:05:02	52秒	微信	N/A	39.144.109.177(山东-聊城)	160	2	1	2	1	3	2	2	4	2	2	1	5	5	5	5	5	5	5	5	5	5	5	5	5	5	5	5	5	5	5	5	5	5	5	5	5	5	5	5	5	5	5	5
323	2026/4/7 15:05:05	99秒	微信	N/A	39.144.109.156(山东-聊城)	192	1	3	3	1	2	3	1	3	2	2	1	6	6	6	6	6	6	6	6	6	6	6	6	6	6	6	6	6	6	6	6	6	6	6	6	6	6	6	6	6	6	6	6
324	2026/4/7 15:05:11	75秒	微信	N/A	112.224.217.221(山东-济南)	224	1	1	3	1	2	3	3	1	1	1	4	7	7	7	7	7	7	7	7	7	7	7	7	7	7	7	7	7	7	7	7	7	7	7	7	7	7	7	7	7	7	7	7
325	2026/4/7 15:05:15	73秒	微信	N/A	223.160.161.178(山东-济南)	160	2	3	3	1	4	2	2	1	1	1	3	5	5	5	5	5	5	5	5	5	5	5	5	5	5	5	5	5	5	5	5	5	5	5	5	5	5	5	5	5	5	5	5
326	2026/4/7 15:05:18	74秒	微信	N/A	223.104.194.179(山东-济南)	224	1	1	1	1	1	1	2	3	1	1	4	7	7	7	7	7	7	7	7	7	7	7	7	7	7	7	7	7	7	7	7	7	7	7	7	7	7	7	7	7	7	7	7
327	2026/4/7 15:05:19	198秒	微信	N/A	182.33.36.182(山东-济宁)	96	1	1	3	1	4	1	1	1	1	1	1	3	3	3	3	3	3	3	3	3	3	3	3	3	3	3	3	3	3	3	3	3	3	3	3	3	3	3	3	3	3	3	3
328	2026/4/7 15:05:20	64秒	微信	N/A	144.12.90.151(山东-济南)	224	1	1	2	1	2	2	2	1	1	1	1	7	7	7	7	7	7	7	7	7	7	7	7	7	7	7	7	7	7	7	7	7	7	7	7	7	7	7	7	7	7	7	7
329	2026/4/7 15:05:21	161秒	微信	N/A	223.104.196.105(山东-济宁)	180	1	1	3	1	2	3	3	2	1	2	4	6	2	7	7	7	7	7	7	7	6	6	6	7	1	4	4	6	6	5	6	2	6	5	5	6	7	7	7	4	6	6	5
330	2026/4/7 15:05:23	71秒	微信	N/A	223.104.196.96(山东-济宁)	128	2	3	3	1	4	1	1	2	1	3	3	4	4	4	4	4	4	4	4	4	4	4	4	4	4	4	4	4	4	4	4	4	4	4	4	4	4	4	4	4	4	4	4
331	2026/4/7 15:05:26	82秒	微信	N/A	112.224.219.174(山东-济南)	128	2	1	3	1	4	2	1	2	2	2	2	4	4	4	4	4	4	4	4	4	4	4	4	4	4	4	4	4	4	4	4	4	4	4	4	4	4	4	4	4	4	4	4
332	2026/4/7 15:05:27	92秒	微信	N/A	112.224.143.5(山东-济南)	128	1	1	2	1	2	2	2	5	2	2	1	4	4	4	4	4	4	4	4	4	4	4	4	4	4	4	4	4	4	4	4	4	4	4	4	4	4	4	4	4	4	4	4
333	2026/4/7 15:05:28	146秒	微信	N/A	223.99.163.166(山东-济南)	172	1	1	2	1	4	1	1	1	1	1	3	7	7	7	7	6	7	7	6	7	7	4	2	7	7	6	7	7	3	3	3	5	4	6	6	2	2	3	4	5	5	6	7
334	2026/4/7 15:05:36	171秒	微信	N/A	144.12.252.47(山东-滨州)	224	1	1	2	1	4	3	3	5	2	3	1	7	7	7	7	7	7	7	7	7	7	7	7	7	7	7	7	7	7	7	7	7	7	7	7	7	7	7	7	7	7	7	7
335	2026/4/7 15:05:43	113秒	微信	N/A	223.104.195.217(山东-泰安)	103	1	1	5	1	3	2	1	5	2	2	3	4	2	7	7	1	1	1	4	1	6	5	4	2	5	5	2	5	5	5	2	2	5	2	2	3	5	2	4	1	1	1	1
336	2026/4/7 15:05:49	163秒	微信	N/A	223.104.194.129(山东-济南)	136	2	3	3	1	4	1	1	3	2	1	3	4	4	4	4	4	4	4	4	6	6	6	6	4	4	4	4	4	4	4	4	4	4	4	4	4	4	4	4	4	4	4	4
337	2026/4/7 15:05:53	154秒	微信	N/A	112.53.79.11(山东-济南)	150	2	1	3	1	4	1	1	1	2	2	1	4	5	4	4	6	5	5	4	4	4	3	5	5	5	4	3	5	4	5	4	5	5	5	5	6	7	4	6	7	5	4	3
338	2026/4/7 15:05:54	79秒	微信	N/A	223.104.194.139(山东-济南)	129	2	1	2	1	4	3	1	4	2	1	3	4	4	4	4	4	4	4	4	4	4	4	4	4	4	4	4	4	4	5	4	4	4	4	4	4	4	4	4	4	4	4	4
339	2026/4/7 15:05:55	84秒	微信	N/A	39.144.109.140(山东-聊城)	128	2	3	3	1	4	1	2	4	1	2	2	4	4	4	4	4	4	4	4	4	4	4	4	4	4	4	4	4	4	4	4	4	4	4	4	4	4	4	4	4	4	4	4
340	2026/4/7 15:05:56	125秒	微信	N/A	112.53.79.13(山东-济南)	92	2	1	3	1	4	1	1	5	1	1	3	1	1	3	3	3	3	3	3	3	3	3	3	3	3	3	3	3	3	3	3	3	3	3	3	3	3	3	3	3	3	3	3
341	2026/4/7 15:05:56	76秒	微信	N/A	112.224.222.98(山东-济南)	224	1	1	3	1	2	1	1	3	2	1	3	7	7	7	7	7	7	7	7	7	7	7	7	7	7	7	7	7	7	7	7	7	7	7	7	7	7	7	7	7	7	7	7
342	2026/4/7 15:06:04	82秒	微信	N/A	39.144.109.131(山东-聊城)	128	2	1	2	1	2	2	2	2	1	1	3	4	4	4	4	4	4	4	4	4	4	4	4	4	4	4	4	4	4	4	4	4	4	4	4	4	4	4	4	4	4	4	4
343	2026/4/7 15:06:06	109秒	微信	N/A	39.144.109.130(山东-聊城)	167	1	1	5	1	3	2	2	2	1	2	1	6	5	5	5	5	6	5	4	5	6	5	5	5	5	6	7	6	6	6	5	5	3	5	4	5	5	6	5	5	6	5	5
344	2026/4/7 15:06:12	138秒	微信	N/A	39.144.109.155(山东-聊城)	128	2	2	2	1	2	2	3	5	2	2	1	4	4	4	4	4	4	4	4	4	4	4	4	4	4	4	4	4	4	4	4	4	4	4	4	4	4	4	4	4	4	4	4
345	2026/4/7 15:06:13	253秒	微信	N/A	223.99.163.166(山东-济南)	191	2	1	3	1	4	1	1	3	2	1	4	5	6	5	6	6	7	5	7	6	6	6	6	5	6	6	6	7	7	7	6	6	6	6	6	5	6	5	6	6	6	7	5
346	2026/4/7 15:06:19	68秒	微信	N/A	223.160.161.155(山东-济南)	32	1	1	2	1	2	3	2	4	2	3	4	1	1	1	1	1	1	1	1	1	1	1	1	1	1	1	1	1	1	1	1	1	1	1	1	1	1	1	1	1	1	1	1
347	2026/4/7 15:06:19	142秒	微信	N/A	39.144.109.146(山东-聊城)	185	2	1	3	1	4	1	1	1	2	1	4	7	1	7	7	7	7	7	7	7	7	7	7	7	7	7	7	7	7	7	7	3	7	4	4	3	2	2	6	5	5	5	5
348	2026/4/7 15:06:24	95秒	微信	N/A	112.224.163.228(山东-济南)	192	1	1	3	2	2	2	2	4	2	2	4	6	6	6	6	6	6	6	6	6	6	6	6	6	6	6	6	6	6	6	6	6	6	6	6	6	6	6	6	6	6	6	6
349	2026/4/7 15:06:28	79秒	微信	N/A	39.144.109.163(山东-聊城)	224	2	1	2	1	2	2	1	2	1	1	1	7	7	7	7	7	7	7	7	7	7	7	7	7	7	7	7	7	7	7	7	7	7	7	7	7	7	7	7	7	7	7	7
350	2026/4/7 15:06:30	134秒	微信	N/A	39.144.109.131(山东-聊城)	157	2	3	3	1	4	1	1	2	2	1	3	5	5	5	5	3	5	5	5	5	5	5	5	5	5	5	5	5	5	5	5	5	5	5	5	5	5	5	5	5	5	5	4
351	2026/4/7 15:06:31	130秒	微信	N/A	39.144.109.157(山东-聊城)	128	2	1	2	1	2	2	2	3	1	1	1	4	4	4	4	4	4	4	4	4	4	4	4	4	4	4	4	4	4	4	4	4	4	4	4	4	4	4	4	4	4	4	4
352	2026/4/7 15:06:32	205秒	微信	N/A	112.53.79.12(山东-济南)	92	2	1	2	1	2	1	3	4	2	1	4	4	2	2	7	5	4	3	4	7	3	4	3	4	6	4	5	3	7	2	1	1	1	1	1	1	1	1	1	1	1	1	1
353	2026/4/7 15:06:32	160秒	微信	N/A	223.104.194.151(山东-济南)	116	2	1	3	1	4	2	2	5	2	2	4	3	3	4	6	4	3	3	3	3	3	3	3	3	3	5	3	5	3	5	3	3	5	4	3	4	2	5	5	4	3	5	2
354	2026/4/7 15:06:34	71秒	微信	N/A	39.144.109.191(山东-聊城)	104	2	1	3	1	1	2	2	1	2	1	4	3	3	3	3	3	3	3	3	3	3	3	3	3	3	3	3	3	3	3	3	3	3	3	3	3	3	3	3	5	5	5	5
355	2026/4/7 15:06:34	153秒	微信	N/A	112.53.79.12(山东-济南)	123	2	1	3	1	3	1	1	2	2	2	2	4	3	4	5	4	4	5	3	3	4	5	4	5	3	4	5	4	4	3	2	2	4	3	4	5	5	4	6	4	2	3	3
356	2026/4/7 15:06:36	71秒	微信	N/A	112.224.225.45(山东-济南)	224	2	1	2	1	2	2	2	4	2	2	1	7	7	7	7	7	7	7	7	7	7	7	7	7	7	7	7	7	7	7	7	7	7	7	7	7	7	7	7	7	7	7	7
357	2026/4/7 15:06:36	61秒	微信	N/A	223.104.195.126(山东-泰安)	145	2	1	5	1	1	4	4	3	1	2	4	7	4	5	5	4	5	6	3	4	4	6	5	6	1	7	7	4	4	4	3	3	4	5	2	5	3	5	5	6	3	5	5
358	2026/4/7 15:06:37	512秒	微信	N/A	112.224.217.167(山东-济南)	181	1	1	2	1	4	2	2	4	2	1	4	5	4	6	5	6	6	5	6	5	6	5	6	5	7	5	6	5	6	6	5	5	6	6	6	6	6	6	6	6	6	6	6
359	2026/4/7 15:06:37	83秒	微信	N/A	39.144.109.191(山东-聊城)	160	2	1	5	1	2	2	2	2	1	2	1	5	5	5	5	5	5	5	5	5	5	5	5	5	5	5	5	5	5	5	5	5	5	5	5	5	5	5	5	5	5	5	5
360	2026/4/7 15:06:46	63秒	微信	N/A	112.232.212.181(山东-济南)	128	1	1	2	1	2	3	3	2	1	3	2	4	4	4	4	4	4	4	4	4	4	4	4	4	4	4	4	4	4	4	4	4	4	4	4	4	4	4	4	4	4	4	4
361	2026/4/7 15:06:47	54秒	微信	N/A	39.144.0.203(山东-菏泽)	132	1	1	2	1	1	1	1	5	2	2	4	5	5	5	5	4	4	4	4	4	4	4	4	4	4	4	4	3	4	3	4	5	5	5	5	5	2	2	5	5	3	5	3
362	2026/4/7 15:06:48	83秒	微信	N/A	223.104.194.155(山东-济南)	190	2	1	5	1	4	1	1	2	1	1	1	6	6	5	6	6	6	6	6	6	6	6	6	6	6	6	6	6	6	6	6	6	6	6	6	6	5	6	6	6	6	6	6
363	2026/4/7 15:06:52	164秒	微信	N/A	223.99.163.164(山东-济南)	157	2	1	3	1	3	1	1	2	1	1	4	5	5	5	5	5	5	5	5	5	5	5	5	5	5	5	5	5	4	4	5	4	5	5	6	5	4	5	5	5	5	5	5
364	2026/4/7 15:06:54	138秒	微信	N/A	112.224.228.31(山东-济南)	172	2	1	2	1	4	2	2	1	1	2	4	6	5	5	7	7	6	7	6	6	5	5	5	6	5	5	5	6	5	5	5	5	6	4	5	5	5	5	5	5	5	5	5
365	2026/4/7 15:06:55	79秒	微信	N/A	223.160.164.111(山东-济南)	224	1	1	5	1	4	1	1	1	2	3	4	7	7	7	7	7	7	7	7	7	7	7	7	7	7	7	7	7	7	7	7	7	7	7	7	7	7	7	7	7	7	7	7
366	2026/4/7 15:06:56	97秒	微信	N/A	218.58.41.33(山东-济南)	224	1	1	3	1	4	1	2	3	2	3	4	7	7	7	7	7	7	7	7	7	7	7	7	7	7	7	7	7	7	7	7	7	7	7	7	7	7	7	7	7	7	7	7
367	2026/4/7 15:07:00	53秒	微信	N/A	39.144.108.151(山东-东营)	158	2	1	3	2	2	2	3	2	2	1	1	6	6	6	5	5	5	5	3	5	5	5	5	5	5	5	5	4	5	5	5	4	4	5	5	5	5	5	5	5	5	5	5
368	2026/4/7 15:07:02	69秒	微信	N/A	39.144.109.143(山东-聊城)	149	2	1	3	2	2	2	3	4	2	3	1	4	4	4	4	4	4	4	4	4	4	4	4	4	4	5	5	4	6	5	5	5	6	6	5	5	5	5	4	4	6	6	6
369	2026/4/7 15:07:02	64秒	微信	N/A	223.104.194.187(山东-济南)	224	2	1	3	1	3	1	1	3	2	1	2	7	7	7	7	7	7	7	7	7	7	7	7	7	7	7	7	7	7	7	7	7	7	7	7	7	7	7	7	7	7	7	7
370	2026/4/7 15:07:02	80秒	微信	N/A	223.104.194.172(山东-济南)	166	1	1	1	1	3	2	1	1	1	1	1	5	5	5	5	5	5	5	5	5	5	5	5	5	5	5	5	5	5	5	5	5	5	5	5	5	5	6	6	6	6	6	6
371	2026/4/7 15:07:04	271秒	微信	N/A	39.144.109.185(山东-聊城)	110	2	1	1	1	4	1	1	2	1	1	1	5	3	4	3	3	2	3	3	4	3	4	3	4	4	4	4	4	4	4	3	3	4	4	4	3	3	3	3	3	3	3	3
372	2026/4/7 15:07:05	79秒	微信	N/A	223.104.194.134(山东-济南)	110	2	1	5	1	4	1	1	4	2	3	1	3	4	2	4	2	4	4	3	3	5	3	3	3	5	3	3	3	4	3	3	4	4	4	3	3	4	4	3	4	3	4	3
373	2026/4/7 15:07:08	103秒	微信	N/A	112.224.141.126(山东-济南)	133	2	1	1	1	4	3	3	5	2	2	4	7	5	3	4	5	3	5	3	5	3	3	5	5	3	3	5	5	3	5	5	3	3	3	5	6	3	5	5	5	2	5	3
374	2026/4/7 15:07:09	63秒	微信	N/A	39.144.109.159(山东-聊城)	110	2	1	1	1	4	1	1	3	2	3	2	4	4	2	4	2	3	3	3	3	3	3	3	3	4	4	3	4	3	3	4	4	3	5	3	5	4	3	3	4	3	4	4
375	2026/4/7 15:07:14	305秒	微信	N/A	39.144.109.178(山东-聊城)	102	1	1	5	1	4	1	1	3	2	1	4	2	2	2	4	3	3	3	3	3	3	3	3	3	4	3	3	5	3	3	4	3	3	3	3	4	3	3	5	3	3	4	3
376	2026/4/7 15:07:15	140秒	微信	N/A	223.99.163.166(山东-济南)	104	1	1	3	1	2	2	2	2	1	1	4	3	4	3	4	3	3	3	3	3	3	3	3	3	3	3	3	6	3	4	4	4	3	3	3	3	3	3	3	3	3	3	3
377	2026/4/7 15:07:15	219秒	微信	N/A	218.58.41.242(山东-济南)	176	1	2	3	1	4	2	1	4	2	1	4	7	4	7	7	4	4	4	6	6	5	6	5	5	5	5	5	7	6	7	6	4	5	5	4	6	6	7	7	5	5	6	5
378	2026/4/7 15:07:16	98秒	微信	N/A	39.82.244.151(山东-济南)	96	2	2	5	1	3	1	1	2	2	3	1	3	3	3	3	3	3	3	3	3	3	3	3	3	3	3	3	3	3	3	3	3	3	3	3	3	3	3	3	3	3	3	3
379	2026/4/7 15:07:20	124秒	微信	N/A	223.104.194.164(山东-济南)	91	2	1	2	1	4	1	1	1	2	2	1	1	1	3	2	3	3	3	3	3	3	3	3	3	3	3	3	3	3	3	3	3	3	3	3	3	3	3	3	3	3	3	3
380	2026/4/7 15:07:21	108秒	微信	N/A	223.104.194.153(山东-济南)	128	2	1	2	1	3	1	1	3	2	2	4	4	4	4	4	4	4	4	4	4	4	4	4	4	4	4	4	4	4	4	4	4	4	4	4	4	4	4	4	4	4	4	4
381	2026/4/7 15:07:23	113秒	微信	N/A	112.232.212.78(山东-济南)	192	2	1	3	1	2	2	1	3	2	1	1	6	6	6	6	6	6	6	6	6	6	6	6	6	6	6	6	6	6	6	6	6	6	6	6	6	6	6	6	6	6	6	6
382	2026/4/7 15:07:24	102秒	微信	N/A	112.232.212.122(山东-济南)	96	2	1	3	1	4	2	2	4	2	1	1	3	3	3	3	3	3	3	3	3	3	3	3	3	3	3	3	3	3	3	3	3	3	3	3	3	3	3	3	3	3	3	3
383	2026/4/7 15:07:25	80秒	微信	N/A	112.224.163.201(山东-济南)	128	2	1	2	1	2	1	2	3	1	1	1	4	4	4	4	4	4	4	4	4	4	4	4	4	4	4	4	4	4	4	4	4	4	4	4	4	4	4	4	4	4	4	4
384	2026/4/7 15:07:25	149秒	微信	N/A	223.104.194.138(山东-济南)	141	2	1	2	1	4	1	1	2	2	3	4	3	3	3	3	4	3	5	4	3	6	5	5	5	5	4	6	4	5	4	5	4	5	5	4	5	5	5	6	4	4	4	5
385	2026/4/7 15:07:26	113秒	微信	N/A	144.12.77.168(山东-济南)	125	1	1	1	1	2	3	2	4	1	1	1	7	1	5	4	2	2	4	4	4	4	4	4	4	4	4	4	4	4	4	4	4	4	4	4	4	4	4	4	4	4	4	4
386	2026/4/7 15:07:27	154秒	微信	N/A	39.144.109.147(山东-聊城)	178	2	1	2	1	4	1	1	1	2	1	1	5	6	7	5	5	6	6	7	5	6	5	6	5	6	5	6	5	6	5	6	5	6	5	6	5	6	5	5	5	6	5	6
387	2026/4/7 15:07:27	352秒	微信	N/A	140.75.125.205(山东-青岛)	174	2	1	3	1	2	1	1	1	1	1	1	7	4	5	6	6	6	5	6	4	5	6	6	4	5	4	6	7	6	6	7	1	2	2	6	6	7	7	7	6	6	6	7
388	2026/4/7 15:07:29	112秒	微信	N/A	112.53.79.14(山东-济南)	165	2	1	5	1	1	2	2	2	1	1	4	5	5	6	5	5	5	5	5	5	5	5	5	6	5	6	6	5	5	5	5	5	5	5	5	6	5	5	5	5	5	5	5
389	2026/4/7 15:07:36	37秒	微信	N/A	39.144.109.148(山东-聊城)	146	2	1	3	1	2	3	4	2	2	2	2	4	5	5	5	5	5	5	5	4	4	4	4	5	4	4	5	5	5	5	5	3	6	6	5	6	5	5	5	3	3	3	3
390	2026/4/7 15:07:37	100秒	微信	N/A	112.53.79.12(山东-济南)	154	2	1	2	1	1	3	2	1	2	1	4	4	4	5	5	5	5	5	5	7	6	4	4	6	6	6	6	6	4	5	5	4	7	4	4	4	4	4	4	4	4	4	4
391	2026/4/7 15:07:38	89秒	微信	N/A	112.53.79.12(山东-济南)	96	2	1	3	1	4	2	2	1	2	1	4	3	3	3	3	3	3	3	3	3	3	3	3	3	3	3	3	3	3	3	3	3	3	3	3	3	3	3	3	3	3	3	3
392	2026/4/7 15:07:39	198秒	微信	N/A	223.99.163.165(山东-济南)	144	2	1	3	1	4	1	1	3	2	2	1	5	3	4	5	4	3	4	5	5	4	4	5	5	6	4	5	5	3	5	4	3	4	5	5	5	4	4	6	5	5	5	5
393	2026/4/7 15:07:39	127秒	微信	N/A	223.104.194.164(山东-济南)	224	1	1	5	1	1	4	4	2	2	1	3	7	7	7	7	7	7	7	7	7	7	7	7	7	7	7	7	7	7	7	7	7	7	7	7	7	7	7	7	7	7	7	7
394	2026/4/7 15:07:45	133秒	微信	N/A	112.224.162.208(山东-济南)	108	2	1	5	1	3	1	2	1	2	2	2	3	3	3	3	4	3	3	3	4	4	5	5	5	4	3	3	4	3	3	3	3	3	3	3	3	3	3	3	3	3	3	4
395	2026/4/7 15:07:46	109秒	微信	N/A	113.127.204.159(山东-济南)	224	1	1	3	1	4	3	3	3	1	1	1	7	7	7	7	7	7	7	7	7	7	7	7	7	7	7	7	7	7	7	7	7	7	7	7	7	7	7	7	7	7	7	7
396	2026/4/7 15:07:50	185秒	微信	N/A	39.144.109.134(山东-聊城)	106	1	1	1	1	4	2	2	2	2	3	4	1	1	1	1	1	1	1	1	1	4	6	7	7	7	4	4	7	4	2	7	3	1	1	1	4	4	4	4	4	4	4	4
397	2026/4/7 15:07:54	84秒	微信	N/A	112.232.212.147(山东-济南)	97	1	1	2	1	1	2	3	5	2	1	1	3	2	3	3	3	3	3	3	3	3	3	3	3	3	3	3	3	3	4	3	3	3	3	3	3	3	3	4	3	3	3	3
398	2026/4/7 15:07:55	296秒	微信	N/A	39.82.244.129(山东-济南)	156	2	2	5	1	4	2	2	4	2	2	1	6	5	5	5	4	5	5	5	4	5	5	5	5	5	5	5	5	5	5	5	4	4	5	4	5	5	5	5	5	5	5	5
399	2026/4/7 15:07:56	86秒	微信	N/A	112.224.228.53(山东-济南)	96	1	1	5	1	2	3	3	5	1	3	1	3	3	3	3	3	3	3	3	3	3	3	3	3	3	3	3	3	3	3	3	3	3	3	3	3	3	3	3	3	3	3	3
400	2026/4/7 15:07:56	227秒	微信	N/A	39.144.109.185(山东-聊城)	86	2	1	5	1	4	1	1	3	2	1	1	4	2	2	3	3	3	3	3	2	3	3	3	3	3	3	3	3	3	3	3	2	2	2	2	3	2	2	3	2	2	3	3
401	2026/4/7 15:07:59	126秒	微信	N/A	218.58.41.66(山东-济南)	173	1	1	1	2	4	2	1	2	2	1	1	6	6	5	5	5	6	6	5	5	6	6	6	5	6	5	5	5	5	6	6	5	4	5	6	6	6	4	5	6	5	6	5
402	2026/4/7 15:07:59	234秒	微信	N/A	223.160.164.174(山东-济南)	205	2	1	3	1	4	1	1	2	2	1	4	7	4	7	4	7	7	7	7	7	7	6	7	6	6	7	6	6	6	7	6	6	7	6	6	7	7	6	7	7	6	6	7
403	2026/4/7 15:08:00	97秒	微信	N/A	112.53.79.13(山东-济南)	120	2	1	3	1	4	1	1	4	2	2	4	4	4	4	4	4	4	3	4	4	4	3	4	4	3	3	4	4	4	3	4	4	4	3	4	4	3	4	4	4	4	3	4
404	2026/4/7 15:08:01	138秒	微信	N/A	112.53.79.12(山东-济南)	211	2	1	2	1	4	2	2	3	1	1	1	7	3	7	7	4	4	4	7	7	7	7	7	7	7	7	7	7	7	7	7	7	7	7	7	7	7	7	7	7	7	7	7
405	2026/4/7 15:08:03	84秒	微信	N/A	223.99.163.165(山东-济南)	216	2	1	3	1	3	3	3	5	2	2	4	7	7	7	7	7	7	7	7	7	7	7	7	7	7	7	7	7	7	7	7	6	7	6	7	6	5	6	7	7	6	7	6
406	2026/4/7 15:08:04	239秒	微信	N/A	112.224.224.4(山东-济南)	169	2	1	3	1	4	1	1	3	2	1	1	5	5	5	5	5	4	6	4	6	5	6	5	6	5	4	6	6	6	7	6	5	4	5	5	6	6	5	5	6	5	6	4
407	2026/4/7 15:08:05	293秒	微信	N/A	223.104.194.167(山东-济南)	154	2	1	2	1	2	3	2	3	2	1	1	5	5	4	6	4	5	4	5	5	5	4	5	5	4	5	6	5	6	5	4	4	5	4	4	5	5	5	5	5	5	5	5
408	2026/4/7 15:08:06	169秒	微信	N/A	223.104.194.185(山东-济南)	208	2	1	2	1	2	1	1	4	2	1	4	7	7	7	7	7	7	7	7	7	7	7	7	3	3	3	3	7	7	7	7	7	7	7	7	7	7	7	7	7	7	7	7
409	2026/4/7 15:08:10	112秒	微信	N/A	112.53.79.12(山东-济南)	95	2	1	5	1	4	1	1	4	2	2	1	3	3	3	4	2	2	2	2	3	2	3	2	3	2	4	4	3	2	3	3	3	3	4	3	4	3	4	3	3	4	3	3
410	2026/4/7 15:08:11	192秒	微信	N/A	223.99.163.166(山东-济南)	149	2	1	3	1	2	1	1	2	2	1	4	4	2	5	5	4	4	4	5	5	5	5	5	4	4	4	4	5	4	5	4	3	5	5	5	6	6	6	6	6	4	6	4
411	2026/4/7 15:08:11	147秒	微信	N/A	144.12.71.15(山东-济南)	140	1	1	1	2	4	2	2	2	2	1	1	5	5	5	5	4	5	5	4	4	5	4	4	4	4	5	5	4	4	5	4	3	4	4	4	4	4	5	5	4	5	4	4
412	2026/4/7 15:08:12	98秒	微信	N/A	223.99.163.164(山东-济南)	192	1	1	2	1	4	2	1	4	2	1	1	7	4	5	5	7	5	6	4	7	5	4	5	7	6	5	5	5	6	7	7	7	7	7	7	6	7	6	6	7	7	6	7
413	2026/4/7 15:08:22	151秒	微信	N/A	223.104.194.186(山东-济南)	192	1	1	2	1	3	1	1	4	2	1	1	6	6	6	6	6	6	6	6	6	6	6	6	6	6	6	6	6	6	6	6	6	6	6	6	6	6	6	6	6	6	6	6
414	2026/4/7 15:08:24	118秒	微信	N/A	223.99.163.164(山东-济南)	192	2	1	2	1	2	2	1	2	1	1	3	7	5	6	6	6	6	6	6	6	6	6	6	6	6	6	6	6	6	6	6	6	6	6	6	6	6	6	6	6	6	6	6
415	2026/4/7 15:08:28	129秒	微信	N/A	223.160.160.69(山东-济南)	33	2	1	1	2	4	1	1	3	2	3	4	1	2	1	1	1	1	1	1	1	1	1	1	1	1	1	1	1	1	1	1	1	1	1	1	1	1	1	1	1	1	1	1
416	2026/4/7 15:08:28	171秒	微信	N/A	223.104.194.159(山东-济南)	116	2	1	3	1	4	1	1	3	1	1	1	3	3	3	4	4	3	4	2	2	3	3	3	4	2	4	3	7	4	5	4	3	4	5	6	4	3	4	4	3	4	3	3
417	2026/4/7 15:08:29	191秒	微信	N/A	112.224.224.84(山东-济南)	178	2	3	2	1	1	2	3	1	2	2	4	6	5	6	5	6	5	6	5	6	5	6	5	6	5	6	5	6	5	6	5	6	7	6	5	6	5	6	5	6	5	6	5
418	2026/4/7 15:08:30	340秒	微信	N/A	112.224.141.105(山东-济南)	168	1	3	3	1	4	1	1	1	1	1	3	7	7	6	5	5	4	5	6	6	6	6	6	5	4	4	4	5	5	5	5	3	6	6	4	5	5	5	6	5	5	6	6
419	2026/4/7 15:08:32	305秒	微信	N/A	223.104.194.156(山东-济南)	224	2	1	3	1	4	1	1	1	2	2	1	7	7	7	7	7	7	7	7	7	7	7	7	7	7	7	7	7	7	7	7	7	7	7	7	7	7	7	7	7	7	7	7
420	2026/4/7 15:08:34	142秒	微信	N/A	223.104.194.162(山东-济南)	132	2	1	2	1	2	3	3	1	1	2	2	5	5	5	5	4	4	4	4	4	4	4	4	4	4	4	4	4	4	4	4	4	4	4	4	4	4	4	4	4	4	4	4
421	2026/4/7 15:08:35	231秒	微信	N/A	223.99.163.165(山东-济南)	163	2	1	2	1	4	1	1	1	1	1	4	5	2	6	6	6	6	6	6	5	6	5	5	5	6	5	5	6	5	5	4	3	5	5	5	5	5	5	5	5	5	5	5
422	2026/4/7 15:08:39	95秒	微信	N/A	223.104.194.177(山东-济南)	160	2	1	5	1	4	1	1	1	2	1	4	5	5	5	5	5	5	5	5	5	5	5	5	5	5	5	5	5	5	5	5	5	5	5	5	5	5	5	5	5	5	5	5
423	2026/4/7 15:08:42	103秒	微信	N/A	223.104.194.178(山东-济南)	128	2	1	2	1	2	2	2	1	1	1	1	4	4	4	4	4	4	4	4	4	4	4	4	4	4	4	4	4	4	4	4	4	4	4	4	4	4	4	4	4	4	4	4
424	2026/4/7 15:08:51	149秒	微信	N/A	223.104.194.184(山东-济南)	224	1	1	5	1	2	1	1	5	2	1	1	7	7	7	7	7	7	7	7	7	7	7	7	7	7	7	7	7	7	7	7	7	7	7	7	7	7	7	7	7	7	7	7
425	2026/4/7 15:08:53	143秒	微信	N/A	223.160.160.168(山东-济南)	121	2	1	2	1	3	1	1	3	2	1	1	5	4	5	5	5	3	3	3	3	3	3	5	3	3	4	4	5	3	4	5	3	3	3	3	4	4	3	4	4	4	4	4
426	2026/4/7 15:08:54	192秒	微信	N/A	112.53.79.12(山东-济南)	119	2	1	5	1	4	2	1	2	2	2	1	3	2	4	3	3	2	3	4	3	3	3	3	3	3	3	4	4	3	3	2	3	4	4	4	7	6	7	7	5	4	4	3
427	2026/4/7 15:08:54	190秒	微信	N/A	223.104.194.153(山东-济南)	146	2	1	2	1	4	1	1	2	2	1	4	4	1	4	5	5	5	4	3	5	5	4	5	4	4	4	4	7	5	7	4	4	5	3	4	6	6	5	5	4	4	7	4
428	2026/4/7 15:08:56	85秒	微信	N/A	112.53.79.13(山东-济南)	154	2	2	2	1	3	2	2	4	2	1	1	4	3	5	5	6	5	4	4	3	5	4	5	5	4	5	4	4	5	6	4	5	4	5	6	6	5	5	6	6	5	6	5
429	2026/4/7 15:08:57	137秒	微信	N/A	39.144.109.140(山东-聊城)	128	1	1	1	1	1	1	1	1	1	1	2	4	4	4	4	4	4	4	4	4	4	4	4	4	4	4	4	4	4	4	4	4	4	4	4	4	4	4	4	4	4	4	4
430	2026/4/7 15:09:03	80秒	微信	N/A	39.144.109.180(山东-聊城)	128	2	1	2	1	2	1	1	5	2	1	4	4	4	4	4	4	4	4	4	4	4	4	4	4	4	4	4	4	4	4	4	4	4	4	4	4	4	4	4	4	4	4	4
431	2026/4/7 15:09:06	210秒	微信	N/A	112.53.79.14(山东-济南)	97	2	1	5	1	4	2	1	1	1	1	1	4	2	2	4	3	3	3	2	2	2	1	2	2	1	1	5	4	3	3	3	3	3	4	4	4	4	5	4	4	3	4	3
432	2026/4/7 15:09:07	102秒	微信	N/A	223.104.196.15(山东-济宁)	128	2	1	3	1	3	2	1	3	2	1	1	4	4	4	4	4	4	4	4	4	4	4	4	4	4	4	4	4	4	4	4	4	4	4	4	4	4	4	4	4	4	4	4
433	2026/4/7 15:09:08	93秒	微信	N/A	112.224.160.41(山东-济南)	190	2	3	2	1	4	1	1	1	2	2	1	6	4	6	6	6	6	6	6	6	6	6	6	6	6	6	6	6	6	6	6	6	6	6	6	6	6	6	6	6	6	6	6
434	2026/4/7 15:09:10	76秒	微信	N/A	39.144.109.167(山东-聊城)	224	1	2	1	1	4	1	1	1	2	2	1	7	7	7	7	7	7	7	7	7	7	7	7	7	7	7	7	7	7	7	7	7	7	7	7	7	7	7	7	7	7	7	7
435	2026/4/7 15:09:10	150秒	微信	N/A	112.224.226.194(山东-济南)	207	2	1	3	1	3	1	2	3	2	2	1	6	6	6	6	5	6	6	6	6	6	6	6	6	6	6	6	7	7	7	7	7	7	7	7	7	7	7	7	7	7	7	7
436	2026/4/7 15:09:12	109秒	微信	N/A	182.33.45.232(山东-济宁)	164	2	3	2	1	3	1	1	1	2	1	1	5	5	5	5	5	5	5	5	5	5	5	5	5	5	5	5	5	5	5	5	6	5	5	5	6	5	5	5	6	6	5	5
437	2026/4/7 15:09:25	167秒	微信	N/A	39.144.109.139(山东-聊城)	220	2	1	1	1	2	1	1	3	2	1	4	7	7	7	7	7	7	7	7	7	7	7	7	7	7	7	7	7	7	7	7	7	7	7	7	7	7	7	7	7	4	6	7
438	2026/4/7 15:09:42	253秒	微信	N/A	223.104.194.147(山东-济南)	179	2	1	3	1	3	1	1	1	1	1	2	5	5	6	6	6	6	6	6	6	6	6	6	6	5	5	6	6	5	5	4	5	5	6	6	6	6	5	5	6	5	6	6
439	2026/4/7 15:09:52	274秒	微信	N/A	112.224.162.220(山东-济南)	139	2	1	1	1	1	1	1	2	1	2	1	3	3	4	4	6	6	6	4	3	5	4	6	5	4	4	4	4	3	5	3	3	3	5	4	5	5	5	5	4	4	5	5
440	2026/4/7 15:09:54	90秒	微信	N/A	223.104.194.177(山东-济南)	117	1	1	1	1	3	2	1	3	1	1	1	3	3	3	3	3	3	3	3	4	5	3	5	3	5	2	5	3	5	3	5	3	5	3	6	2	5	3	5	2	4	2	5
441	2026/4/7 15:09:56	283秒	微信	N/A	112.224.226.238(山东-济南)	167	2	1	3	1	2	3	2	1	1	1	2	5	5	5	5	5	5	5	5	5	5	5	5	5	4	4	5	5	5	6	6	5	6	5	6	5	5	5	6	6	6	6	6
442	2026/4/7 15:09:57	101秒	微信	N/A	223.99.163.164(山东-济南)	224	1	2	2	1	2	1	2	2	2	1	1	7	7	7	7	7	7	7	7	7	7	7	7	7	7	7	7	7	7	7	7	7	7	7	7	7	7	7	7	7	7	7	7
443	2026/4/7 15:09:57	323秒	微信	N/A	112.232.212.67(山东-济南)	110	2	1	2	2	2	2	2	5	1	2	4	2	2	5	4	4	7	7	3	3	2	3	4	4	4	4	4	3	3	3	3	3	3	3	3	3	3	3	3	3	3	3	3
444	2026/4/7 15:10:00	204秒	微信	N/A	112.224.218.155(山东-济南)	108	2	1	3	1	4	1	1	1	1	1	1	3	3	3	3	3	3	3	3	3	3	3	3	3	3	3	3	3	3	3	3	3	3	3	3	3	3	3	3	6	6	6	6
445	2026/4/7 15:10:04	55秒	微信	N/A	112.224.163.43(山东-济南)	115	1	1	1	1	3	1	1	5	2	3	4	6	6	5	4	4	4	3	3	3	4	3	3	4	3	4	3	3	4	3	3	3	4	3	3	3	4	3	3	3	4	4	3
446	2026/4/7 15:10:06	90秒	微信	N/A	112.224.227.124(山东-济南)	64	1	1	1	1	3	1	1	5	2	2	4	2	2	2	2	2	2	2	2	2	2	2	2	2	2	2	2	2	2	2	2	2	2	2	2	2	2	2	2	2	2	2	2
447	2026/4/7 15:10:07	220秒	微信	N/A	223.104.194.130(山东-济南)	110	2	1	2	1	3	2	2	2	2	1	4	3	2	4	3	3	4	3	4	4	3	4	3	4	3	4	3	4	3	4	3	4	3	4	3	4	3	4	3	3	4	3	4
448	2026/4/7 15:10:07	327秒	微信	N/A	223.104.194.147(山东-济南)	166	2	1	3	1	2	1	1	2	1	1	1	5	6	4	7	5	5	5	5	6	5	5	5	5	5	5	5	7	5	5	5	2	5	5	5	4	4	4	7	7	7	7	4
449	2026/4/7 15:10:08	252秒	微信	N/A	112.224.221.117(山东-济南)	164	1	1	2	1	4	1	1	4	2	1	4	5	3	6	5	5	3	6	4	5	7	3	5	5	6	3	4	7	3	7	7	7	7	2	4	6	5	6	5	7	5	5	6
450	2026/4/7 15:10:15	108秒	微信	N/A	39.144.109.165(山东-聊城)	138	2	1	3	1	4	3	1	1	1	1	4	3	1	2	7	4	3	5	6	5	5	5	5	2	2	2	3	3	3	3	3	1	4	4	4	5	7	7	7	7	7	6	7
451	2026/4/7 15:10:19	179秒	微信	N/A	223.99.163.164(山东-济南)	199	2	1	2	1	3	2	3	2	2	2	1	7	4	5	5	7	7	4	7	4	7	7	7	7	7	7	7	7	7	7	7	7	7	7	7	4	4	6	6	5	5	7	7
452	2026/4/7 15:10:20	135秒	微信	N/A	39.144.109.165(山东-聊城)	224	1	1	5	1	4	1	1	2	1	1	4	7	7	7	7	7	7	7	7	7	7	7	7	7	7	7	7	7	7	7	7	7	7	7	7	7	7	7	7	7	7	7	7
453	2026/4/7 15:10:21	68秒	微信	N/A	223.104.194.143(山东-济南)	32	1	1	1	1	4	1	1	5	2	3	4	1	1	1	1	1	1	1	1	1	1	1	1	1	1	1	1	1	1	1	1	1	1	1	1	1	1	1	1	1	1	1	1
454	2026/4/7 15:10:21	76秒	微信	N/A	223.99.163.164(山东-济南)	224	2	1	3	1	3	2	2	1	1	1	1	7	7	7	7	7	7	7	7	7	7	7	7	7	7	7	7	7	7	7	7	7	7	7	7	7	7	7	7	7	7	7	7
455	2026/4/7 15:10:22	151秒	微信	N/A	182.39.27.197(山东-济南)	63	2	1	1	1	2	2	1	1	1	3	1	4	2	2	4	6	2	3	2	1	1	1	1	1	1	2	3	3	2	2	2	1	1	1	1	1	1	1	3	1	1	3	3
456	2026/4/7 15:10:25	61秒	微信	N/A	223.104.194.138(山东-济南)	224	2	3	2	1	2	2	2	5	2	2	4	7	7	7	7	7	7	7	7	7	7	7	7	7	7	7	7	7	7	7	7	7	7	7	7	7	7	7	7	7	7	7	7
457	2026/4/7 15:10:32	83秒	微信	N/A	39.144.109.129(山东-聊城)	211	2	4	1	1	4	1	1	2	1	1	4	7	7	6	7	7	6	6	6	6	6	7	7	7	7	6	6	7	6	7	6	7	7	7	7	7	6	7	6	7	7	6	7
458	2026/4/7 15:10:36	76秒	微信	N/A	112.224.223.53(山东-济南)	160	1	1	1	1	4	3	3	1	1	2	1	5	5	5	5	5	5	5	5	5	5	5	5	5	5	5	5	5	5	5	5	5	5	5	5	5	5	5	5	5	5	5	5
459	2026/4/7 15:10:38	175秒	微信	N/A	223.104.194.166(山东-济南)	150	1	1	1	1	3	2	2	1	2	1	1	5	3	4	4	5	5	3	4	5	4	4	5	5	4	5	5	5	5	5	5	5	5	5	5	5	5	5	5	5	5	5	5
460	2026/4/7 15:10:44	61秒	微信	N/A	223.99.163.164(山东-济南)	224	2	1	1	1	2	3	3	5	2	1	1	7	7	7	7	7	7	7	7	7	7	7	7	7	7	7	7	7	7	7	7	7	7	7	7	7	7	7	7	7	7	7	7
461	2026/4/7 15:10:49	156秒	微信	N/A	223.99.163.164(山东-济南)	128	2	1	1	2	2	1	1	4	2	2	4	4	4	4	4	4	4	4	4	4	4	4	4	4	4	4	4	4	4	4	4	4	4	4	4	4	4	4	4	4	4	4	4
462	2026/4/7 15:10:52	121秒	微信	N/A	112.224.221.250(山东-济南)	179	2	1	2	1	4	1	2	1	1	2	1	5	5	5	5	5	5	5	5	5	5	5	5	5	6	5	6	7	6	6	6	6	6	6	6	6	6	6	6	6	6	6	6
463	2026/4/7 15:10:52	222秒	微信	N/A	112.53.79.12(山东-济南)	132	2	1	3	1	2	1	1	1	1	1	4	6	4	3	6	4	4	4	5	2	2	3	7	4	3	7	2	5	2	3	3	2	4	7	5	5	5	5	7	3	3	4	3
464	2026/4/7 15:10:54	82秒	微信	N/A	123.233.72.227(山东-济南)	224	1	1	1	1	2	3	3	3	1	1	1	7	7	7	7	7	7	7	7	7	7	7	7	7	7	7	7	7	7	7	7	7	7	7	7	7	7	7	7	7	7	7	7
465	2026/4/7 15:10:57	57秒	微信	N/A	39.144.109.139(山东-聊城)	128	1	1	1	1	4	1	1	5	2	3	1	4	4	4	4	4	4	4	4	4	4	4	4	4	4	4	4	4	4	4	4	4	4	4	4	4	4	4	4	4	4	4	4
466	2026/4/7 15:10:58	85秒	微信	N/A	112.224.217.128(山东-济南)	128	1	1	1	2	1	3	2	3	2	2	1	4	4	4	4	4	4	4	4	4	4	4	4	4	4	4	4	4	4	4	4	4	4	4	4	4	4	4	4	4	4	4	4
467	2026/4/7 15:11:02	114秒	微信	N/A	39.144.109.151(山东-聊城)	143	1	1	1	1	2	3	2	1	1	1	4	2	2	2	4	2	2	2	2	6	6	6	4	5	5	5	5	7	6	4	2	5	5	5	5	5	5	5	5	6	6	6	6
468	2026/4/7 15:11:15	321秒	微信	N/A	223.104.196.12(山东-济宁)	139	1	1	2	1	4	1	1	4	2	2	1	7	5	7	7	4	3	4	7	7	7	2	3	4	4	4	4	7	4	4	4	4	4	4	7	2	2	2	2	3	3	4	4
469	2026/4/7 15:11:17	112秒	微信	N/A	223.160.160.140(山东-济南)	192	1	1	1	1	4	1	1	4	1	2	4	6	6	6	6	6	6	6	6	6	6	6	6	6	6	6	6	6	6	6	6	6	6	6	6	6	6	6	6	6	6	6	6
470	2026/4/7 15:11:19	547秒	微信	N/A	39.144.109.141(山东-聊城)	193	2	3	3	1	2	3	1	2	1	1	2	5	5	7	6	6	5	6	6	7	7	7	7	6	6	5	6	7	6	6	5	4	7	6	6	6	6	6	7	6	6	6	6
471	2026/4/7 15:11:20	183秒	微信	N/A	223.99.163.164(山东-济南)	126	2	1	3	1	4	1	1	2	1	3	4	4	4	5	3	4	3	4	5	4	4	4	4	4	3	4	4	4	3	4	4	3	3	4	4	4	4	4	6	4	4	4	4
472	2026/4/7 15:11:26	102秒	微信	N/A	39.144.109.147(山东-聊城)	128	2	1	1	1	2	3	2	2	1	2	4	4	4	4	4	4	4	4	4	4	4	4	4	4	4	4	4	4	4	4	4	4	4	4	4	4	4	4	4	4	4	4	4
473	2026/4/7 15:11:26	88秒	微信	N/A	223.104.194.151(山东-济南)	133	2	2	5	1	4	1	1	1	2	2	2	4	4	4	4	4	4	4	4	4	4	4	4	4	4	4	4	4	4	4	4	6	5	5	5	4	4	4	4	4	4	4	4
474	2026/4/7 15:11:28	51秒	微信	N/A	223.99.163.164(山东-济南)	224	1	1	1	1	3	1	1	1	1	1	4	7	7	7	7	7	7	7	7	7	7	7	7	7	7	7	7	7	7	7	7	7	7	7	7	7	7	7	7	7	7	7	7
475	2026/4/7 15:11:31	114秒	微信	N/A	112.224.222.30(山东-济南)	224	2	2	3	1	2	1	1	1	1	1	1	7	7	7	7	7	7	7	7	7	7	7	7	7	7	7	7	7	7	7	7	7	7	7	7	7	7	7	7	7	7	7	7
476	2026/4/7 15:11:43	119秒	微信	N/A	144.12.99.158(山东-菏泽)	128	2	3	2	1	2	1	1	5	2	3	4	4	4	4	4	4	4	4	4	4	4	4	4	4	4	4	4	4	4	4	4	4	4	4	4	4	4	4	4	4	4	4	4
477	2026/4/7 15:11:47	75秒	微信	N/A	113.127.93.244(山东-济南)	154	2	1	2	1	4	1	1	3	2	1	1	6	5	5	6	5	4	5	4	5	4	5	5	5	4	5	5	5	6	5	5	3	5	4	6	5	5	5	3	5	4	5	5
478	2026/4/7 15:11:49	397秒	微信	N/A	112.224.223.3(山东-济南)	94	1	1	1	1	4	1	1	2	2	1	1	3	4	4	3	4	4	4	3	4	3	3	3	3	3	3	3	3	3	3	3	3	3	3	3	2	2	2	2	2	2	2	2
479	2026/4/7 15:12:01	87秒	微信	N/A	112.224.223.174(山东-济南)	132	2	3	2	1	4	1	1	2	2	2	3	5	4	4	4	4	4	4	4	4	4	4	4	4	4	4	4	5	4	4	5	5	4	4	4	4	4	4	4	4	4	4	4
480	2026/4/7 15:12:03	217秒	微信	N/A	218.58.41.86(山东-济南)	100	2	1	2	1	4	2	2	1	1	2	4	3	3	3	3	3	3	3	3	3	3	3	3	3	3	3	3	3	3	3	3	3	3	3	3	3	3	3	3	4	4	4	4
481	2026/4/7 15:12:07	47秒	微信	N/A	39.144.109.129(山东-聊城)	126	1	1	3	2	4	2	2	1	2	2	1	4	4	4	4	4	4	4	4	4	4	4	4	4	4	4	4	4	4	4	4	4	3	5	2	4	4	4	4	4	4	4	4
482	2026/4/7 15:12:20	164秒	微信	N/A	39.144.109.153(山东-聊城)	128	2	1	1	1	1	1	1	3	2	1	4	4	4	4	4	4	4	4	4	4	4	4	4	4	4	4	4	4	4	4	4	4	4	4	4	4	4	4	4	4	4	4	4
483	2026/4/7 15:12:28	376秒	微信	N/A	223.104.194.167(山东-济南)	38	1	1	1	1	2	1	1	3	2	3	4	1	1	1	7	1	1	1	1	1	1	1	1	1	1	1	1	1	1	1	1	1	1	1	1	1	1	1	1	1	1	1	1
484	2026/4/7 15:12:47	108秒	微信	N/A	39.144.109.171(山东-聊城)	168	2	3	2	1	3	1	1	2	2	1	1	7	7	7	7	5	5	5	5	5	5	5	5	5	5	5	5	5	5	5	5	5	5	5	5	5	5	5	5	5	5	5	5
485	2026/4/7 15:12:56	119秒	微信	N/A	223.104.194.134(山东-济南)	173	2	3	2	1	4	2	1	2	2	1	1	7	7	6	6	6	6	6	6	6	6	6	6	6	3	5	5	5	5	5	5	5	5	5	5	5	5	5	5	5	5	5	5
486	2026/4/7 15:12:57	99秒	微信	N/A	112.224.222.218(山东-济南)	168	2	3	2	1	3	2	2	3	1	1	1	5	5	5	5	5	5	5	5	5	5	5	5	5	5	5	5	6	6	6	6	5	5	5	5	6	6	6	6	5	5	5	5
487	2026/4/7 15:13:01	81秒	微信	N/A	223.99.163.166(山东-济南)	218	1	3	2	1	4	1	1	2	1	1	3	7	7	7	7	7	4	4	7	7	7	7	7	7	7	7	7	7	7	7	7	7	7	7	7	7	7	7	7	7	7	7	7
488	2026/4/7 15:13:04	67秒	微信	N/A	223.104.195.161(山东-泰安)	128	1	1	1	1	3	1	1	2	2	2	1	4	4	4	4	4	4	4	4	4	4	4	4	4	4	4	4	4	4	4	4	4	4	4	4	4	4	4	4	4	4	4	4
489	2026/4/7 15:13:11	67秒	微信	N/A	182.33.185.134(山东-潍坊)	224	2	3	5	1	3	1	1	2	1	1	1	7	7	7	7	7	7	7	7	7	7	7	7	7	7	7	7	7	7	7	7	7	7	7	7	7	7	7	7	7	7	7	7
490	2026/4/7 15:13:16	96秒	微信	N/A	39.144.109.165(山东-聊城)	160	2	1	1	1	4	3	3	5	2	3	1	5	5	5	5	5	5	5	5	5	5	5	5	5	5	5	5	5	5	5	5	5	5	5	5	5	5	5	5	5	5	5	5
491	2026/4/7 15:13:21	57秒	微信	N/A	223.104.194.153(山东-济南)	214	1	1	1	1	4	1	2	1	1	1	1	7	7	7	7	4	7	7	7	4	5	7	5	7	7	7	7	7	7	7	7	7	7	7	7	7	7	7	7	7	7	7	7
492	2026/4/7 15:13:23	56秒	微信	N/A	112.53.79.14(山东-济南)	128	1	3	2	1	4	1	1	3	1	1	1	4	4	4	4	4	4	4	4	4	4	4	4	4	4	4	4	4	4	4	4	4	4	4	4	4	4	4	4	4	4	4	4
493	2026/4/7 15:13:31	74秒	微信	N/A	144.12.42.23(山东-淄博)	163	2	3	2	1	4	3	1	1	1	1	1	5	5	7	6	5	6	5	5	5	6	5	5	4	5	4	5	4	5	4	5	5	4	5	5	5	5	6	5	6	5	5	6
494	2026/4/7 15:13:42	93秒	微信	N/A	39.144.109.146(山东-聊城)	135	2	3	2	1	2	3	3	1	1	2	1	5	5	5	5	3	3	4	4	7	5	4	5	4	4	4	4	4	4	4	4	4	4	4	4	4	4	4	4	4	4	4	4
495	2026/4/7 15:13:47	89秒	微信	N/A	112.224.220.255(山东-济南)	137	1	3	2	1	2	1	2	4	1	1	1	7	7	7	4	4	4	4	4	4	4	4	4	4	4	4	4	4	4	4	4	4	4	4	4	4	4	4	4	4	4	4	4
496	2026/4/7 15:13:52	71秒	微信	N/A	223.99.163.166(山东-济南)	160	1	3	2	1	4	1	1	3	1	1	1	5	5	5	5	5	5	5	5	5	5	5	5	5	5	5	5	5	5	5	5	5	5	5	5	5	5	5	5	5	5	5	5
497	2026/4/7 15:13:58	99秒	微信	N/A	112.224.227.156(山东-济南)	128	2	3	2	1	1	1	1	2	2	1	1	4	4	4	4	4	4	4	4	4	4	4	4	4	4	4	4	4	4	4	4	4	4	4	4	4	4	4	4	4	4	4	4
498	2026/4/7 15:13:58	270秒	微信	N/A	112.224.228.114(山东-济南)	189	1	1	1	1	3	1	2	1	1	1	1	7	6	5	7	7	5	4	7	5	5	4	4	7	7	7	7	7	7	7	6	4	4	4	6	7	6	6	5	6	6	7	7
499	2026/4/7 15:14:06	106秒	微信	N/A	112.53.79.13(山东-济南)	128	2	1	1	1	4	1	1	3	2	3	4	4	4	4	4	4	4	4	4	4	4	4	4	4	4	4	4	4	4	4	4	4	4	4	4	4	4	4	4	4	4	4	4
500	2026/4/7 15:14:08	90秒	微信	N/A	112.224.191.24(山东-济南)	129	2	3	2	1	3	1	2	5	2	2	1	4	5	4	3	4	5	5	3	4	3	5	3	4	5	4	3	4	3	3	4	5	3	3	3	5	4	4	5	5	5	4	5
501	2026/4/7 15:14:09	162秒	微信	N/A	112.53.79.13(山东-济南)	195	2	1	3	1	3	2	3	2	2	1	3	7	7	7	7	7	7	7	7	6	6	6	6	5	6	6	6	6	6	6	6	5	5	5	5	6	6	6	6	6	6	6	6
502	2026/4/7 15:14:10	145秒	微信	N/A	112.224.218.38(山东-济南)	100	2	1	2	2	2	3	2	1	2	1	1	2	2	2	2	2	2	2	2	2	2	5	4	4	4	2	4	3	4	4	4	4	3	3	3	4	4	4	2	3	5	3	4
503	2026/4/7 15:14:13	73秒	微信	N/A	112.224.162.78(山东-济南)	172	2	3	2	1	2	2	2	3	2	1	1	5	5	5	5	6	6	5	5	6	6	6	5	6	6	6	5	6	5	5	5	5	5	6	6	5	5	5	5	6	5	5	5
504	2026/4/7 15:14:14	87秒	微信	N/A	223.99.163.164(山东-济南)	112	2	3	2	1	1	2	2	1	1	1	1	4	4	4	4	4	4	4	4	4	4	4	4	3	3	3	3	3	3	3	3	3	3	3	3	3	3	3	3	4	4	4	4
505	2026/4/7 15:14:15	112秒	微信	N/A	112.224.2.151(山东-济南)	191	1	3	3	1	4	1	1	3	1	2	3	6	5	6	6	6	6	5	6	6	6	5	6	6	6	5	6	5	7	7	7	7	7	7	6	7	6	4	6	6	6	5	6
506	2026/4/7 15:14:16	285秒	微信	N/A	112.224.219.153(山东-济南)	164	2	1	2	1	2	3	3	1	1	1	1	6	6	6	6	5	5	5	5	5	5	5	5	5	5	5	5	5	5	5	5	5	5	5	5	5	5	5	5	5	5	5	5
507	2026/4/7 15:14:35	42秒	微信	N/A	113.126.105.1(山东-菏泽)	129	2	3	2	1	1	3	3	1	1	1	2	5	4	4	4	4	4	4	4	4	4	4	4	4	4	4	4	4	4	4	4	4	4	4	4	4	4	4	4	4	4	4	4
508	2026/4/7 15:14:39	71秒	微信	N/A	39.144.109.155(山东-聊城)	133	2	3	2	1	2	3	3	2	1	1	1	4	4	4	4	4	4	4	4	4	4	4	4	4	4	4	5	4	5	4	5	4	5	4	5	4	4	4	4	4	4	4	4
509	2026/4/7 15:14:53	198秒	微信	N/A	112.224.226.10(山东-济南)	128	2	1	5	1	3	2	1	2	2	1	1	4	4	4	4	4	4	4	4	4	4	4	4	4	4	4	4	4	4	4	4	4	4	4	4	4	4	4	4	4	4	4	4
510	2026/4/7 15:14:56	85秒	微信	N/A	39.144.109.137(山东-聊城)	128	2	3	2	1	4	3	3	1	1	1	1	4	4	4	4	4	4	4	4	4	4	4	4	4	4	4	4	4	4	4	4	4	4	4	4	4	4	4	4	4	4	4	4
511	2026/4/7 15:15:01	286秒	微信	N/A	182.33.65.13(山东-济宁)	149	2	3	2	2	4	1	1	2	2	1	1	5	4	5	5	5	4	5	5	5	5	5	5	5	4	4	4	6	5	5	3	3	5	3	5	5	5	5	5	5	5	5	4
512	2026/4/7 15:15:07	179秒	微信	N/A	218.58.41.199(山东-济南)	224	1	2	1	1	1	2	2	4	1	3	4	7	7	7	7	7	7	7	7	7	7	7	7	7	7	7	7	7	7	7	7	7	7	7	7	7	7	7	7	7	7	7	7
513	2026/4/7 15:15:11	177秒	微信	N/A	112.224.222.63(山东-济南)	138	1	3	3	1	2	2	3	5	2	2	2	2	2	7	7	7	7	7	7	7	7	5	1	2	6	3	6	4	5	4	2	2	2	5	2	3	2	3	3	3	6	6	3
514	2026/4/7 15:15:12	129秒	微信	N/A	223.104.194.162(山东-济南)	224	2	3	2	2	2	2	3	3	2	1	1	7	7	7	7	7	7	7	7	7	7	7	7	7	7	7	7	7	7	7	7	7	7	7	7	7	7	7	7	7	7	7	7
515	2026/4/7 15:15:13	70秒	微信	N/A	39.144.109.139(山东-聊城)	132	1	1	1	1	1	1	3	5	1	1	2	1	5	5	5	1	4	5	5	4	4	5	4	4	4	4	4	4	3	4	5	3	5	5	5	3	3	5	3	3	5	5	7
516	2026/4/7 15:15:16	120秒	微信	N/A	112.224.161.22(山东-济南)	224	2	3	2	1	4	1	3	1	1	1	1	7	7	7	7	7	7	7	7	7	7	7	7	7	7	7	7	7	7	7	7	7	7	7	7	7	7	7	7	7	7	7	7
517	2026/4/7 15:15:23	107秒	微信	N/A	223.160.161.77(山东-济南)	152	2	1	3	1	4	1	1	5	2	2	4	4	4	4	4	4	4	4	4	4	4	4	5	4	3	4	4	7	7	4	4	5	5	5	5	7	7	7	7	5	3	5	5
518	2026/4/7 15:15:25	60秒	微信	N/A	223.104.194.186(山东-济南)	224	1	1	1	1	3	1	1	5	1	1	1	7	7	7	7	7	7	7	7	7	7	7	7	7	7	7	7	7	7	7	7	7	7	7	7	7	7	7	7	7	7	7	7
519	2026/4/7 15:15:29	70秒	微信	N/A	39.144.109.7(山东-聊城)	128	2	3	2	1	3	1	1	1	1	1	1	4	4	4	4	4	4	4	4	4	4	4	4	4	4	4	4	4	4	4	4	4	4	4	4	4	4	4	4	4	4	4	4
520	2026/4/7 15:15:31	133秒	微信	N/A	112.53.79.12(山东-济南)	108	2	3	2	1	4	2	2	1	1	1	1	6	6	6	6	3	3	3	3	3	3	3	3	3	3	3	3	3	3	3	3	3	3	3	3	3	3	3	3	3	3	3	3
521	2026/4/7 15:15:36	93秒	微信	N/A	112.224.163.48(山东-济南)	75	1	1	5	1	4	4	4	3	2	1	4	2	2	2	2	2	2	3	3	3	3	3	3	2	2	2	3	2	3	2	2	2	3	2	2	2	2	2	3	2	3	2	2
522	2026/4/7 15:15:37	91秒	微信	N/A	112.224.163.242(山东-济南)	224	2	3	5	1	4	2	2	3	2	1	1	7	7	7	7	7	7	7	7	7	7	7	7	7	7	7	7	7	7	7	7	7	7	7	7	7	7	7	7	7	7	7	7
523	2026/4/7 15:15:40	340秒	微信	N/A	223.104.194.189(山东-济南)	127	2	1	2	1	3	2	1	2	2	1	2	4	5	5	5	4	4	5	5	3	4	5	4	3	3	3	3	3	3	4	4	3	5	4	4	3	5	4	4	4	4	4	4
524	2026/4/7 15:15:46	140秒	微信	N/A	113.126.54.198(山东-济南)	121	2	4	2	1	2	2	2	2	2	3	4	4	2	4	4	3	5	5	2	5	5	3	5	5	2	5	5	5	5	5	2	3	5	2	2	4	2	3	5	4	3	5	2
525	2026/4/7 15:15:54	124秒	微信	N/A	112.53.79.14(山东-济南)	160	2	3	3	1	4	1	1	1	1	2	1	5	5	5	5	5	5	5	5	5	5	5	5	5	5	5	5	5	5	5	5	5	5	5	5	5	5	5	5	5	5	5	5
526	2026/4/7 15:15:59	248秒	微信	N/A	112.224.190.255(山东-济南)	142	2	3	5	1	2	3	2	5	2	3	1	7	5	5	5	5	5	5	5	5	5	5	5	6	5	5	3	5	3	4	1	4	4	4	4	4	4	4	4	4	4	4	4
527	2026/4/7 15:16:00	507秒	微信	N/A	39.144.109.186(山东-聊城)	126	2	1	2	1	2	3	2	2	1	2	4	4	3	3	5	4	4	4	3	3	3	4	3	4	3	4	3	7	4	6	3	3	4	4	4	5	3	4	6	4	4	4	4
528	2026/4/7 15:16:10	126秒	微信	N/A	112.224.143.38(山东-济南)	165	1	1	1	1	2	3	3	3	2	1	1	7	7	7	7	4	4	4	4	6	6	4	5	5	7	4	5	4	5	5	5	5	5	5	5	5	5	5	5	5	5	5	5
529	2026/4/7 15:16:11	925秒	微信	N/A	223.99.163.166(山东-济南)	160	1	1	2	1	2	3	3	1	1	1	1	5	5	5	5	5	5	5	5	5	5	5	5	5	5	5	5	5	5	5	5	5	5	5	5	5	5	5	5	5	5	5	5
530	2026/4/7 15:16:14	257秒	微信	N/A	144.12.26.70(山东-淄博)	224	1	3	2	1	3	2	2	2	1	1	1	7	7	7	7	7	7	7	7	7	7	7	7	7	7	7	7	7	7	7	7	7	7	7	7	7	7	7	7	7	7	7	7
531	2026/4/7 15:16:15	136秒	微信	N/A	112.224.170.151(山东-泰安)	224	1	1	2	1	4	2	2	5	2	3	1	7	7	7	7	7	7	7	7	7	7	7	7	7	7	7	7	7	7	7	7	7	7	7	7	7	7	7	7	7	7	7	7
532	2026/4/7 15:16:17	102秒	微信	N/A	218.58.41.242(山东-济南)	147	1	2	2	1	3	3	2	1	2	1	1	5	5	4	5	5	4	5	4	5	4	5	4	5	4	5	4	4	5	4	4	5	5	4	5	5	5	5	5	4	5	4	5
533	2026/4/7 15:16:17	97秒	微信	N/A	223.104.194.159(山东-济南)	125	2	3	2	1	3	1	1	3	1	3	3	4	2	4	4	4	3	4	4	4	4	4	4	4	4	4	4	4	4	4	4	4	4	4	4	4	4	4	4	4	4	4	4
534	2026/4/7 15:16:23	188秒	微信	N/A	39.144.109.179(山东-聊城)	193	2	3	2	1	4	1	2	3	2	3	1	2	1	4	5	3	4	4	2	7	7	7	7	7	7	7	7	7	7	7	7	7	7	7	7	7	7	7	7	7	7	7	7
535	2026/4/7 15:16:27	154秒	微信	N/A	112.224.161.215(山东-济南)	199	2	3	2	1	2	3	3	1	2	1	1	5	5	5	6	5	4	4	6	7	7	5	6	7	7	7	7	7	7	7	7	5	7	7	7	6	6	6	6	7	7	7	7
536	2026/4/7 15:16:30	189秒	微信	N/A	39.144.109.157(山东-聊城)	158	2	3	2	1	2	1	1	1	1	1	1	4	5	5	4	6	5	5	6	5	6	5	6	4	4	4	4	6	6	6	4	4	6	6	6	5	4	5	4	5	4	5	4
537	2026/4/7 15:16:40	160秒	微信	N/A	223.99.163.164(山东-济南)	224	1	1	2	1	2	3	2	2	2	1	1	7	7	7	7	7	7	7	7	7	7	7	7	7	7	7	7	7	7	7	7	7	7	7	7	7	7	7	7	7	7	7	7
538	2026/4/7 15:16:46	49秒	微信	N/A	112.53.79.11(山东-济南)	128	1	3	3	1	3	3	3	3	2	1	1	4	4	4	4	4	4	4	4	4	4	4	4	4	4	4	4	4	4	4	4	4	4	4	4	4	4	4	4	4	4	4	4
539	2026/4/7 15:16:55	393秒	微信	N/A	112.224.221.20(山东-济南)	130	2	1	1	1	4	1	1	4	2	1	1	2	2	3	6	3	3	4	4	3	4	5	4	4	4	4	5	7	4	4	4	2	5	4	5	5	4	4	4	5	5	5	3
540	2026/4/7 15:17:04	109秒	微信	N/A	182.47.171.173(山东-枣庄)	166	2	4	2	1	4	1	1	2	2	2	3	6	6	3	4	4	7	5	3	7	3	6	2	7	5	6	5	7	3	6	7	7	5	6	7	7	2	4	6	5	5	5	5
541	2026/4/7 15:17:05	190秒	微信	N/A	112.53.79.12(山东-济南)	211	1	1	2	1	4	1	1	1	2	1	1	6	5	7	7	5	7	7	7	7	7	6	7	6	6	7	7	7	6	7	6	6	7	6	7	7	7	7	7	7	7	7	6
542	2026/4/7 15:17:22	366秒	微信	N/A	182.33.161.122(山东-潍坊)	178	2	3	2	1	2	2	2	4	2	1	1	7	7	7	7	5	5	6	5	5	6	6	5	5	6	6	5	6	6	6	6	5	5	5	5	5	5	5	6	5	5	5	5
543	2026/4/7 15:17:24	46秒	微信	N/A	144.12.26.70(山东-淄博)	224	1	3	2	1	3	3	3	2	1	1	3	7	7	7	7	7	7	7	7	7	7	7	7	7	7	7	7	7	7	7	7	7	7	7	7	7	7	7	7	7	7	7	7
544	2026/4/7 15:17:29	136秒	微信	N/A	39.144.109.178(山东-聊城)	164	1	1	1	1	4	2	1	1	1	1	1	5	4	3	6	5	5	5	4	5	4	4	4	4	4	4	4	7	7	7	7	5	7	6	6	5	2	3	4	7	7	7	7
545	2026/4/7 15:17:33	87秒	微信	N/A	39.144.109.0(山东-聊城)	136	2	3	5	1	2	2	2	2	2	2	4	5	5	5	5	4	4	4	5	4	5	5	5	4	4	4	4	4	4	4	4	4	4	4	4	4	4	4	4	4	4	4	4
546	2026/4/7 15:17:41	136秒	微信	N/A	112.224.163.119(山东-济南)	82	2	1	3	1	4	2	2	4	1	1	4	2	2	2	2	2	2	2	2	2	2	2	2	2	2	3	3	3	3	3	3	3	3	3	3	3	3	3	3	3	3	3	3
547	2026/4/7 15:17:50	46秒	微信	N/A	223.160.165.127(山东-济南)	74	2	1	2	1	1	4	3	4	1	3	3	1	5	5	5	1	1	1	1	1	1	1	1	1	1	1	1	1	5	1	5	1	6	5	2	2	4	2	2	2	4	2	2
548	2026/4/7 15:17:56	31秒	微信	N/A	182.39.142.242(山东-枣庄)	153	2	3	3	1	3	1	1	4	2	1	2	5	4	4	5	5	3	4	5	5	5	5	5	5	5	5	5	5	5	5	5	5	5	5	3	5	5	5	5	5	5	5	5
549	2026/4/7 15:18:06	380秒	微信	N/A	123.233.72.184(山东-济南)	132	1	1	1	1	2	3	3	2	1	2	1	5	2	1	7	6	5	6	4	2	5	4	1	6	6	6	7	4	3	2	3	1	2	5	6	2	5	5	6	5	3	3	4
550	2026/4/7 15:18:12	136秒	微信	N/A	39.144.109.155(山东-聊城)	156	1	2	1	1	4	1	1	2	1	2	1	5	5	5	5	5	5	5	5	5	5	5	5	5	5	5	5	6	5	5	5	3	4	4	4	5	5	5	5	5	5	5	5
551	2026/4/7 15:18:18	69秒	微信	N/A	223.99.163.164(山东-济南)	224	1	3	1	1	4	2	2	4	1	1	1	7	7	7	7	7	7	7	7	7	7	7	7	7	7	7	7	7	7	7	7	7	7	7	7	7	7	7	7	7	7	7	7
552	2026/4/7 15:18:20	169秒	微信	N/A	39.144.109.160(山东-聊城)	114	2	3	2	1	3	2	1	1	1	1	1	6	2	3	3	4	4	4	4	4	4	4	4	4	4	3	4	3	5	3	5	3	3	2	4	3	2	3	4	3	4	2	4
553	2026/4/7 15:18:40	85秒	微信	N/A	39.144.109.141(山东-聊城)	224	1	1	1	1	4	1	1	1	2	1	1	7	7	7	7	7	7	7	7	7	7	7	7	7	7	7	7	7	7	7	7	7	7	7	7	7	7	7	7	7	7	7	7
554	2026/4/7 15:18:43	234秒	微信	N/A	39.144.109.155(山东-聊城)	141	2	3	2	1	4	2	1	2	2	1	1	5	4	4	5	5	5	5	6	4	5	5	5	4	4	4	4	5	6	4	4	3	5	4	5	4	4	4	5	4	3	4	3
555	2026/4/7 15:18:54	746秒	微信	N/A	112.53.79.12(山东-济南)	131	2	1	2	1	4	1	1	3	2	1	4	5	3	4	6	4	2	4	5	5	6	3	2	2	2	4	5	7	5	7	4	1	5	3	2	3	4	5	6	4	3	6	4
556	2026/4/7 15:18:56	173秒	微信	N/A	123.168.226.32(山东-潍坊)	128	1	3	2	1	3	3	1	5	2	2	1	4	4	4	4	4	4	4	4	4	4	4	4	4	4	4	4	4	4	4	4	4	4	4	4	4	4	4	4	4	4	4	4
557	2026/4/7 15:19:03	996秒	微信	N/A	39.144.109.133(山东-聊城)	143	2	3	3	1	4	3	1	2	1	1	2	5	3	4	5	4	3	4	4	5	4	5	4	4	4	5	6	6	5	4	5	3	4	5	4	4	5	5	5	5	5	5	4
558	2026/4/7 15:19:05	61秒	微信	N/A	182.33.131.104(山东-潍坊)	224	2	3	2	1	2	2	1	3	2	3	1	7	7	7	7	7	7	7	7	7	7	7	7	7	7	7	7	7	7	7	7	7	7	7	7	7	7	7	7	7	7	7	7
559	2026/4/7 15:19:07	62秒	微信	N/A	39.144.109.178(山东-聊城)	128	1	1	1	1	4	2	1	1	1	1	1	4	4	4	4	4	4	4	4	4	4	4	4	4	4	4	4	4	4	4	4	4	4	4	4	4	4	4	4	4	4	4	4
560	2026/4/7 15:19:21	382秒	微信	N/A	112.224.143.200(山东-济南)	160	1	1	1	1	2	3	3	4	2	3	2	5	5	5	5	5	5	5	5	5	5	5	5	5	5	5	5	5	5	5	5	5	5	5	5	5	5	5	5	5	5	5	5
561	2026/4/7 15:19:32	152秒	微信	N/A	39.144.109.149(山东-聊城)	104	1	3	2	2	2	1	1	5	1	1	1	4	4	4	5	3	3	3	3	3	3	3	3	3	3	3	3	3	3	3	3	3	3	3	3	4	3	4	4	3	3	3	3
562	2026/4/7 15:19:36	148秒	微信	N/A	113.126.59.186(山东-济南)	65	1	3	1	1	4	1	1	2	2	1	4	3	2	2	2	2	2	2	2	2	2	2	2	2	2	2	2	2	2	2	2	2	2	2	2	2	2	2	2	2	2	2	2
563	2026/4/7 15:19:39	470秒	微信	N/A	123.233.72.58(山东-济南)	168	2	1	1	1	3	2	1	3	2	2	3	6	6	6	6	6	6	6	6	6	6	6	6	6	6	6	6	5	5	5	5	5	5	5	5	4	4	4	4	4	4	4	4
564	2026/4/7 15:19:43	236秒	微信	N/A	223.104.194.183(山东-济南)	128	2	3	2	1	4	2	1	2	2	2	1	4	4	4	4	4	4	4	4	4	4	4	4	4	4	4	4	4	4	4	4	4	4	4	4	4	4	4	4	4	4	4	4
565	2026/4/7 15:19:53	99秒	微信	N/A	39.144.109.187(山东-聊城)	224	1	2	1	1	4	3	2	5	2	2	1	7	7	7	7	7	7	7	7	7	7	7	7	7	7	7	7	7	7	7	7	7	7	7	7	7	7	7	7	7	7	7	7
566	2026/4/7 15:19:58	146秒	微信	N/A	39.144.109.184(山东-聊城)	224	2	1	1	2	2	2	3	1	1	2	1	7	7	7	7	7	7	7	7	7	7	7	7	7	7	7	7	7	7	7	7	7	7	7	7	7	7	7	7	7	7	7	7
567	2026/4/7 15:20:20	67秒	微信	N/A	223.104.194.168(山东-济南)	93	1	2	2	1	4	1	1	2	1	1	1	2	2	2	2	3	3	3	3	3	3	4	3	3	3	3	3	3	3	3	3	3	3	3	3	3	3	3	3	3	3	3	3
568	2026/4/7 15:20:20	70秒	微信	N/A	112.86.84.174(江苏-苏州)	148	2	2	2	1	4	1	1	1	1	1	1	5	5	5	5	5	5	5	5	5	5	5	5	4	4	4	4	4	4	4	4	4	4	4	4	5	5	5	5	5	5	5	5
569	2026/4/7 15:20:31	83秒	微信	N/A	112.224.228.121(山东-济南)	224	1	2	5	1	4	1	2	5	2	1	1	7	7	7	7	7	7	7	7	7	7	7	7	7	7	7	7	7	7	7	7	7	7	7	7	7	7	7	7	7	7	7	7
570	2026/4/7 15:20:52	101秒	微信	N/A	39.144.109.176(山东-聊城)	128	2	2	2	1	2	1	2	2	2	1	1	4	4	4	4	4	4	4	4	4	4	4	4	4	4	4	4	4	4	4	4	4	4	4	4	4	4	4	4	4	4	4	4
571	2026/4/7 15:20:53	84秒	微信	N/A	112.224.161.13(山东-济南)	95	1	1	5	1	4	1	1	5	2	3	4	1	1	2	2	2	2	3	3	4	3	3	3	4	4	3	4	3	3	3	3	3	3	3	3	4	5	3	4	3	3	2	3
572	2026/4/7 15:20:58	108秒	微信	N/A	39.144.109.146(山东-聊城)	195	2	2	2	1	4	1	2	2	1	1	1	5	5	5	6	4	3	5	6	7	7	7	7	7	7	7	7	6	6	6	6	6	6	4	4	7	7	7	7	7	7	7	7
573	2026/4/7 15:20:58	98秒	微信	N/A	39.144.109.147(山东-聊城)	158	2	2	5	1	2	3	2	4	2	2	1	5	5	5	5	5	6	5	5	5	5	5	5	5	5	5	5	4	5	5	4	5	5	5	5	5	5	5	5	5	5	4	5
574	2026/4/7 15:21:15	51秒	微信	N/A	223.99.163.165(山东-济南)	224	2	1	1	1	4	1	1	2	2	2	1	7	7	7	7	7	7	7	7	7	7	7	7	7	7	7	7	7	7	7	7	7	7	7	7	7	7	7	7	7	7	7	7
575	2026/4/7 15:21:21	58秒	微信	N/A	223.99.163.166(山东-济南)	224	2	3	2	1	2	1	1	1	1	1	1	7	7	7	7	7	7	7	7	7	7	7	7	7	7	7	7	7	7	7	7	7	7	7	7	7	7	7	7	7	7	7	7
576	2026/4/7 15:21:21	68秒	微信	N/A	112.224.226.198(山东-济南)	224	2	2	2	1	4	2	1	4	2	1	1	7	7	7	7	7	7	7	7	7	7	7	7	7	7	7	7	7	7	7	7	7	7	7	7	7	7	7	7	7	7	7	7
577	2026/4/7 15:21:26	677秒	微信	N/A	39.144.109.162(山东-聊城)	132	2	3	3	1	2	1	1	4	2	1	3	5	5	4	4	5	4	4	5	5	4	4	5	5	4	4	5	5	4	4	4	3	4	3	4	3	3	4	4	4	4	3	4
578	2026/4/7 15:21:36	66秒	微信	N/A	223.104.194.148(山东-济南)	192	1	1	1	1	4	2	2	2	2	1	1	6	6	6	6	6	6	6	6	6	6	6	6	6	6	6	6	6	6	6	6	6	6	6	6	6	6	6	6	6	6	6	6
579	2026/4/7 15:21:41	237秒	微信	N/A	39.144.109.133(山东-聊城)	142	1	1	1	1	4	1	1	5	2	1	4	3	3	5	5	3	3	4	5	3	5	2	2	4	2	6	5	5	2	2	1	6	6	6	6	6	6	6	6	6	6	6	6
580	2026/4/7 15:21:45	143秒	微信	N/A	112.230.183.240(山东-济南)	224	1	3	2	1	2	1	2	2	1	2	1	7	7	7	7	7	7	7	7	7	7	7	7	7	7	7	7	7	7	7	7	7	7	7	7	7	7	7	7	7	7	7	7
581	2026/4/7 15:21:47	65秒	微信	N/A	39.144.109.135(山东-聊城)	134	2	3	1	2	4	1	1	2	1	2	4	4	4	4	4	4	4	4	4	4	4	4	4	4	4	4	4	4	4	4	4	4	4	4	4	4	5	4	5	5	5	5	5
582	2026/4/7 15:21:48	154秒	微信	N/A	112.224.227.76(山东-济南)	157	2	2	2	1	4	1	1	1	2	1	1	7	5	4	5	5	5	4	3	4	5	5	6	4	5	5	5	5	4	5	5	3	4	5	6	5	5	5	5	5	6	6	6
583	2026/4/7 15:21:50	101秒	微信	N/A	112.224.163.232(山东-济南)	145	1	1	3	1	2	3	3	3	2	2	4	4	4	5	6	4	4	5	5	3	4	3	5	5	4	4	5	5	5	4	4	5	4	4	4	5	5	5	5	6	5	5	4
584	2026/4/7 15:22:02	83秒	微信	N/A	218.58.41.13(山东-济南)	129	2	1	2	1	2	1	1	1	1	1	1	4	4	4	4	4	4	4	4	4	4	4	4	4	4	4	4	4	4	4	4	4	4	4	4	5	4	4	4	4	4	4	4
585	2026/4/7 15:22:11	288秒	微信	N/A	39.144.109.146(山东-聊城)	128	2	3	2	1	2	1	1	1	1	2	1	4	4	4	4	4	4	4	4	4	4	4	4	4	4	4	4	4	4	4	4	4	4	4	4	4	4	4	4	4	4	4	4
586	2026/4/7 15:22:13	113秒	微信	N/A	112.224.163.140(山东-济南)	126	1	1	2	1	2	3	2	3	2	1	1	4	4	4	4	3	3	4	4	4	3	5	4	4	4	5	3	4	4	4	4	4	4	4	4	5	3	4	4	4	4	4	4
587	2026/4/7 15:22:18	127秒	微信	N/A	112.224.225.253(山东-济南)	96	2	2	2	1	2	3	1	1	2	2	1	3	3	3	3	3	3	3	3	3	3	3	3	3	3	3	3	3	3	3	3	3	3	3	3	3	3	3	3	3	3	3	3
588	2026/4/7 15:22:20	458秒	微信	N/A	223.99.163.166(山东-济南)	188	1	1	1	1	1	3	3	1	1	1	1	6	6	6	6	5	6	6	6	6	6	6	6	6	6	6	6	6	6	6	3	6	6	6	6	6	6	6	6	6	6	6	6
589	2026/4/7 15:22:30	112秒	微信	N/A	112.224.219.117(山东-济南)	224	2	1	2	1	2	2	2	3	2	2	1	7	7	7	7	7	7	7	7	7	7	7	7	7	7	7	7	7	7	7	7	7	7	7	7	7	7	7	7	7	7	7	7
590	2026/4/7 15:22:36	127秒	微信	N/A	112.224.226.189(山东-济南)	128	2	2	2	1	4	1	1	2	2	1	1	4	4	4	4	4	4	4	4	4	4	4	4	4	4	4	4	4	4	4	4	4	4	4	4	4	4	4	4	4	4	4	4
591	2026/4/7 15:22:43	101秒	微信	N/A	39.144.109.174(山东-聊城)	128	2	3	3	1	2	3	3	4	2	1	2	4	4	4	4	4	4	4	4	4	4	4	4	4	4	4	4	4	4	4	4	4	4	4	4	4	4	4	4	4	4	4	4
592	2026/4/7 15:22:54	146秒	微信	N/A	144.12.115.136(山东-菏泽)	93	2	1	1	1	3	1	1	2	2	1	1	7	7	1	6	1	1	2	1	2	2	2	2	4	4	3	3	3	4	3	2	3	3	3	3	3	3	3	4	2	2	2	2
593	2026/4/7 15:22:57	86秒	微信	N/A	223.99.163.164(山东-济南)	128	2	3	3	1	2	2	1	1	1	2	3	4	4	4	4	4	4	4	4	4	4	4	4	4	4	4	4	4	4	4	4	4	4	4	4	4	4	4	4	4	4	4	4
594	2026/4/7 15:23:07	168秒	微信	N/A	223.104.194.129(山东-济南)	162	2	2	2	1	4	1	1	2	2	1	1	5	5	5	5	5	5	5	5	5	5	5	5	5	5	5	5	7	5	5	5	4	4	4	4	6	6	6	6	5	5	5	5
595	2026/4/7 15:23:25	255秒	微信	N/A	112.230.183.8(山东-济南)	161	2	2	3	1	4	1	1	1	2	2	1	7	3	3	7	4	6	6	6	4	5	5	6	5	6	7	7	7	3	4	3	3	5	5	5	4	4	3	5	5	5	7	6
596	2026/4/7 15:23:49	93秒	微信	N/A	113.127.218.207(山东-济南)	129	1	1	3	1	2	2	1	5	2	1	1	4	4	4	3	5	4	5	3	3	4	4	3	5	6	3	4	3	4	5	4	5	3	4	5	5	4	4	4	3	4	5	3
597	2026/4/7 15:24:02	195秒	微信	N/A	39.144.109.160(山东-聊城)	149	1	2	1	1	2	2	1	4	1	1	1	3	4	4	4	5	4	4	4	4	4	4	4	4	4	4	4	6	4	5	4	4	4	4	4	7	7	7	7	6	6	5	5
598	2026/4/7 15:24:10	120秒	微信	N/A	223.160.164.89(山东-济南)	38	1	3	1	1	1	1	3	1	1	1	3	1	2	2	2	2	2	2	1	1	1	1	1	1	1	1	1	1	1	1	1	1	1	1	1	1	1	1	1	1	1	1	1
599	2026/4/7 15:24:17	133秒	微信	N/A	112.53.79.14(山东-济南)	129	1	1	1	1	3	1	1	2	1	2	3	4	5	4	5	5	4	5	4	3	4	3	3	4	4	4	4	4	4	4	4	4	4	4	4	4	4	4	4	4	4	4	4
600	2026/4/7 15:24:19	232秒	微信	N/A	112.224.191.223(山东-济南)	163	2	2	2	1	4	1	2	3	2	2	1	3	2	3	5	4	4	5	6	6	7	5	6	6	5	6	6	7	7	5	4	1	6	5	7	5	5	4	6	6	5	5	6
601	2026/4/7 15:24:32	229秒	微信	N/A	39.144.109.177(山东-聊城)	224	1	3	1	1	2	1	1	4	1	2	3	7	7	7	7	7	7	7	7	7	7	7	7	7	7	7	7	7	7	7	7	7	7	7	7	7	7	7	7	7	7	7	7
602	2026/4/7 15:24:37	191秒	微信	N/A	112.224.190.192(山东-济南)	219	2	3	3	1	2	3	3	1	1	1	3	7	7	7	7	7	7	7	7	7	7	7	7	7	7	7	7	7	7	7	6	7	7	6	7	7	7	7	7	7	7	7	4
603	2026/4/7 15:24:39	259秒	微信	N/A	112.224.163.87(山东-济南)	200	2	1	2	2	2	3	3	1	1	1	2	7	7	7	7	6	6	6	6	7	7	7	7	6	7	7	7	7	7	6	5	5	5	5	5	6	6	6	6	6	6	6	6
604	2026/4/7 15:25:12	225秒	微信	N/A	223.99.163.165(山东-济南)	123	1	1	3	1	4	1	1	4	2	2	1	4	5	4	4	4	4	4	4	4	4	4	3	3	3	3	3	4	4	4	4	4	4	4	4	3	4	4	4	4	4	4	4
605	2026/4/7 15:25:14	117秒	微信	N/A	117.136.92.135(山东-青岛)	115	1	2	2	1	2	2	2	3	1	2	1	3	3	4	4	3	4	3	4	3	4	4	3	4	3	3	4	4	3	4	3	4	3	4	3	4	4	5	4	3	4	3	4
606	2026/4/7 15:25:43	105秒	微信	N/A	39.144.109.148(山东-聊城)	190	2	2	2	1	2	1	1	1	1	1	1	6	6	5	6	6	5	6	6	6	6	6	6	6	6	6	6	6	6	6	6	6	6	6	6	6	6	6	6	6	6	6	6
607	2026/4/7 15:25:43	1293秒	微信	N/A	223.99.163.166(山东-济南)	132	2	1	2	1	4	1	1	3	1	1	2	5	4	5	4	4	4	5	3	4	4	3	4	4	4	4	4	4	3	4	4	3	3	4	4	4	5	4	7	4	5	5	4
608	2026/4/7 15:25:52	110秒	微信	N/A	39.144.109.174(山东-聊城)	132	2	2	2	1	2	1	1	5	2	3	1	4	4	4	4	4	4	4	4	7	5	4	4	4	4	4	4	4	4	4	4	4	4	4	4	4	4	4	4	4	4	4	4
609	2026/4/7 15:26:02	143秒	微信	N/A	39.82.253.77(山东-济南)	132	1	2	2	1	3	1	1	3	2	1	1	5	5	5	5	4	4	4	4	4	4	4	4	4	4	4	4	4	4	4	4	4	4	4	4	4	4	4	4	4	4	4	4
610	2026/4/7 15:26:06	177秒	微信	N/A	223.104.195.118(山东-泰安)	150	1	2	2	2	3	3	2	4	1	1	1	5	5	5	6	4	4	5	5	5	6	5	5	5	4	4	4	5	3	5	5	3	5	5	5	4	5	5	3	5	5	5	5
611	2026/4/7 15:26:12	279秒	微信	N/A	223.104.194.170(山东-济南)	128	1	3	2	1	4	2	1	5	2	2	1	4	4	4	4	4	4	4	4	4	4	4	4	4	4	4	4	4	4	4	4	4	4	4	4	4	4	4	4	4	4	4	4
612	2026/4/7 15:26:29	100秒	微信	N/A	39.144.109.187(山东-聊城)	126	2	2	2	1	3	1	1	3	2	1	1	5	4	3	4	3	4	3	4	3	3	4	4	3	3	5	3	6	4	4	4	3	5	4	3	4	5	4	4	5	4	4	5
613	2026/4/7 15:26:31	180秒	微信	N/A	112.224.226.47(山东-济南)	57	2	2	3	1	4	1	1	2	2	2	1	2	1	1	1	1	1	1	1	1	1	1	1	1	1	1	1	4	3	3	3	2	2	2	2	2	2	2	2	2	3	3	3
614	2026/4/7 15:26:34	72秒	微信	N/A	223.99.163.166(山东-济南)	129	1	1	3	2	1	3	4	1	2	1	1	6	5	3	3	5	3	5	3	6	2	3	5	6	4	3	3	5	3	4	4	5	4	4	6	4	4	3	3	5	4	3	3
615	2026/4/7 15:26:38	118秒	微信	N/A	112.224.223.231(山东-济南)	179	2	2	2	1	2	2	2	4	2	2	1	5	4	6	6	5	5	6	6	6	6	5	4	6	6	4	5	6	6	6	6	6	6	6	6	6	4	6	6	6	6	6	6
616	2026/4/7 15:26:44	86秒	微信	N/A	39.144.109.176(山东-聊城)	163	1	2	3	1	2	3	2	4	2	2	1	5	5	5	5	4	4	5	5	5	4	5	5	5	5	5	6	5	5	6	5	5	5	6	5	5	6	5	5	6	6	5	5
617	2026/4/7 15:26:48	127秒	微信	N/A	223.104.194.132(山东-济南)	89	2	2	2	1	4	1	1	4	2	3	1	3	3	3	4	2	2	2	2	3	3	3	3	3	3	3	3	3	2	2	3	3	2	2	2	3	3	3	3	2	4	4	3
618	2026/4/7 15:26:54	109秒	微信	N/A	39.82.244.177(山东-济南)	141	1	1	1	1	2	2	1	5	2	2	1	4	4	4	4	5	4	5	3	6	5	3	4	6	4	6	5	4	6	4	5	4	4	5	3	5	4	3	5	4	6	4	3
619	2026/4/7 15:26:58	93秒	微信	N/A	182.33.50.3(山东-济宁)	150	1	2	5	1	4	2	2	3	1	1	1	3	4	3	3	3	5	3	5	3	5	5	5	4	5	5	5	5	5	4	5	5	5	6	5	5	5	6	6	6	6	5	5
620	2026/4/7 15:27:01	137秒	微信	N/A	144.12.158.117(山东-聊城)	122	2	2	5	1	4	2	1	1	1	1	1	5	4	3	5	5	4	5	3	4	5	3	3	3	3	3	3	5	2	3	4	3	5	4	5	4	3	4	4	3	3	4	5
621	2026/4/7 15:27:06	89秒	微信	N/A	39.144.109.171(山东-聊城)	184	2	2	2	1	4	1	1	1	1	1	1	7	4	4	4	3	5	5	5	7	7	7	7	7	7	7	6	5	6	6	5	5	6	6	6	6	5	6	6	6	6	6	6
622	2026/4/7 15:27:12	48秒	微信	N/A	39.82.253.77(山东-济南)	128	1	2	2	1	4	1	1	4	1	1	1	4	4	4	4	4	4	4	4	4	4	4	4	4	4	4	4	4	4	4	4	4	4	4	4	4	4	4	4	4	4	4	4
623	2026/4/7 15:27:16	95秒	微信	N/A	39.144.109.175(山东-聊城)	223	2	2	2	1	3	3	2	1	1	1	1	7	7	7	7	7	7	7	7	7	7	7	7	7	7	7	7	7	7	7	7	7	7	7	6	7	7	7	7	7	7	7	7
624	2026/4/7 15:27:22	305秒	微信	N/A	39.144.109.97(山东-聊城)	147	2	2	2	1	2	2	2	3	2	1	2	5	2	5	6	6	5	6	5	4	5	5	6	5	4	4	4	5	4	4	4	2	5	4	5	5	5	5	5	5	4	4	4
625	2026/4/7 15:27:39	61秒	微信	N/A	112.224.220.145(山东-济南)	133	2	2	5	1	4	2	2	4	2	2	1	4	4	4	4	4	4	4	4	4	4	4	4	4	5	3	5	5	5	5	5	4	4	4	4	4	4	4	4	4	4	4	4
626	2026/4/7 15:27:43	141秒	微信	N/A	39.144.109.184(山东-聊城)	140	1	2	2	1	3	1	1	5	2	1	1	5	5	4	5	4	4	4	3	4	4	4	4	5	5	5	5	6	5	4	3	4	4	4	4	4	4	4	4	4	4	5	7
627	2026/4/7 15:27:46	65秒	微信	N/A	39.144.108.169(山东-东营)	137	1	2	2	1	4	1	1	4	2	1	1	6	3	3	5	5	5	5	3	5	5	4	4	5	3	4	3	5	3	5	4	5	5	3	3	5	5	4	3	5	5	5	4
628	2026/4/7 15:27:48	69秒	微信	N/A	223.104.194.141(山东-济南)	224	2	2	5	1	2	2	2	4	2	2	1	7	7	7	7	7	7	7	7	7	7	7	7	7	7	7	7	7	7	7	7	7	7	7	7	7	7	7	7	7	7	7	7
629	2026/4/7 15:27:56	83秒	微信	N/A	112.224.143.121(山东-济南)	123	2	2	2	1	4	1	1	5	2	1	1	4	4	3	4	4	5	3	4	3	4	4	3	4	3	4	3	4	3	4	4	4	5	4	3	4	3	5	4	5	3	5	4
630	2026/4/7 15:28:11	87秒	微信	N/A	39.144.109.149(山东-聊城)	140	2	2	5	1	3	1	1	1	1	2	1	4	5	3	5	5	4	5	5	4	5	3	5	5	3	4	4	4	5	5	3	5	5	3	5	5	4	5	4	5	4	4	5
631	2026/4/7 15:28:18	129秒	微信	N/A	223.104.194.129(山东-济南)	55	1	1	2	1	4	1	1	3	2	3	3	2	2	1	1	1	2	2	2	2	2	1	2	2	2	2	2	2	2	2	1	1	1	1	1	2	2	2	2	2	2	2	2
632	2026/4/7 15:28:29	129秒	微信	N/A	112.53.79.14(山东-济南)	32	1	3	2	1	4	1	1	5	2	1	4	1	1	1	1	1	1	1	1	1	1	1	1	1	1	1	1	1	1	1	1	1	1	1	1	1	1	1	1	1	1	1	1
633	2026/4/7 15:28:30	206秒	微信	N/A	39.144.108.180(山东-东营)	129	2	2	5	1	3	3	1	1	1	1	4	5	5	4	5	4	4	4	4	4	4	3	3	4	4	4	4	4	4	4	4	4	4	4	4	4	5	4	5	4	4	3	3
634	2026/4/7 15:28:57	181秒	微信	N/A	112.224.141.241(山东-济南)	55	2	2	2	1	4	1	1	1	1	2	1	3	1	1	1	1	1	1	1	4	1	2	2	1	3	1	3	4	1	1	1	1	1	1	1	3	2	2	2	2	2	2	2
635	2026/4/7 15:29:03	265秒	微信	N/A	39.144.109.161(山东-聊城)	151	2	2	2	1	4	1	1	1	2	1	1	6	5	5	5	4	4	4	5	5	4	5	5	4	4	4	5	7	4	4	4	4	5	4	6	4	5	5	5	5	5	5	5
636	2026/4/7 15:29:11	158秒	微信	N/A	120.225.11.25(山东-济南)	98	2	2	2	1	4	1	1	3	1	1	4	4	1	1	4	2	2	3	2	3	5	5	4	4	2	3	3	6	3	3	3	2	2	2	2	4	4	3	3	3	3	4	3
637	2026/4/7 15:29:13	126秒	微信	N/A	112.230.183.181(山东-济南)	192	1	1	5	1	4	3	2	1	1	1	4	6	6	6	6	6	6	6	6	6	6	6	6	6	6	6	6	6	6	6	6	6	6	6	6	6	6	6	6	6	6	6	6
638	2026/4/7 15:29:14	93秒	微信	N/A	39.144.109.160(山东-聊城)	160	1	2	1	1	4	1	1	5	2	2	1	5	5	5	5	5	5	5	5	5	5	5	5	5	5	5	5	5	5	5	5	5	5	5	5	5	5	5	5	5	5	5	5
639	2026/4/7 15:29:15	65秒	微信	N/A	39.144.109.168(山东-聊城)	119	1	3	2	1	4	2	1	5	2	3	1	2	2	3	4	2	3	4	4	3	3	2	4	3	2	3	5	3	4	4	4	3	4	4	5	4	4	5	6	6	5	5	4
640	2026/4/7 15:29:48	91秒	微信	N/A	223.104.194.169(山东-济南)	160	1	2	1	1	4	2	1	5	2	3	1	5	5	5	5	5	5	5	5	5	5	5	5	5	5	5	5	5	5	5	5	5	5	5	5	5	5	5	5	5	5	5	5
641	2026/4/7 15:29:58	203秒	微信	N/A	112.224.190.222(山东-济南)	135	2	2	2	1	4	2	2	3	2	1	4	4	3	4	4	3	4	4	4	4	4	4	4	4	5	4	5	5	4	4	4	3	4	3	5	5	5	4	5	4	5	6	5
642	2026/4/7 15:30:33	305秒	微信	N/A	223.104.194.146(山东-济南)	156	2	2	5	1	4	1	1	1	2	1	1	5	4	5	6	5	4	6	5	4	5	4	5	5	4	5	5	7	5	5	4	3	4	3	4	6	6	5	6	5	5	6	5
643	2026/4/7 15:30:47	87秒	微信	N/A	112.224.163.132(山东-济南)	147	2	2	2	1	2	2	3	1	1	2	1	4	4	4	4	4	4	4	4	4	4	4	4	6	6	6	6	6	6	5	4	3	5	6	5	4	4	3	4	5	5	5	5
644	2026/4/7 15:30:58	42秒	微信	N/A	112.224.218.190(山东-济南)	183	2	2	2	1	4	1	1	2	2	2	1	7	5	6	6	6	6	7	6	6	6	6	6	6	6	6	6	7	7	5	5	7	5	5	5	3	5	5	6	5	5	6	5
645	2026/4/7 15:31:01	110秒	微信	N/A	223.104.194.158(山东-济南)	192	1	2	3	1	4	1	1	5	2	3	1	6	6	6	6	6	6	6	6	6	6	6	6	6	6	6	6	6	6	6	6	6	6	6	6	6	6	6	6	6	6	6	6
646	2026/4/7 15:31:04	96秒	微信	N/A	112.224.161.150(山东-济南)	33	2	1	2	1	1	2	2	3	2	1	1	1	1	1	1	1	1	1	1	1	1	1	1	1	2	1	1	1	1	1	1	1	1	1	1	1	1	1	1	1	1	1	1
647	2026/4/7 15:31:09	59秒	微信	N/A	112.53.79.14(山东-济南)	224	2	2	4	2	4	1	1	4	2	2	1	7	7	7	7	7	7	7	7	7	7	7	7	7	7	7	7	7	7	7	7	7	7	7	7	7	7	7	7	7	7	7	7
648	2026/4/7 15:31:28	91秒	微信	N/A	39.144.109.138(山东-聊城)	169	2	2	2	1	4	1	1	2	2	3	1	5	6	5	6	5	5	5	5	6	5	5	6	5	5	5	5	5	5	5	5	6	6	6	6	6	5	5	5	5	5	5	5
649	2026/4/7 15:31:35	351秒	微信	N/A	39.144.109.160(山东-聊城)	224	1	1	1	1	2	2	2	1	1	1	1	7	7	7	7	7	7	7	7	7	7	7	7	7	7	7	7	7	7	7	7	7	7	7	7	7	7	7	7	7	7	7	7
650	2026/4/7 15:31:58	64秒	微信	N/A	223.104.194.173(山东-济南)	223	2	2	2	1	2	3	3	2	2	1	1	7	7	7	7	7	7	7	7	7	7	7	7	7	7	7	7	7	7	7	7	7	7	7	7	7	7	7	7	7	7	6	7
651	2026/4/7 15:32:08	148秒	微信	N/A	39.144.109.2(山东-聊城)	218	2	1	3	1	2	3	3	1	2	1	3	7	7	7	7	7	7	7	7	7	7	7	7	7	7	7	7	6	7	6	6	5	6	7	7	7	7	7	7	7	7	7	7
652	2026/4/7 15:32:14	84秒	微信	N/A	112.224.161.116(山东-济南)	128	2	2	2	1	4	1	1	3	2	2	1	4	4	4	4	4	4	4	4	4	4	4	4	4	4	4	4	4	4	4	4	4	4	4	4	4	4	4	4	4	4	4	4
653	2026/4/7 15:32:18	292秒	微信	N/A	39.144.109.159(山东-聊城)	142	2	2	5	1	4	1	1	1	2	2	1	7	2	2	7	6	2	6	6	7	7	2	7	7	2	5	7	4	7	3	3	2	7	2	5	4	3	2	5	2	2	7	2
654	2026/4/7 15:32:20	76秒	微信	N/A	223.104.194.135(山东-济南)	122	1	2	2	1	2	3	3	3	1	2	1	4	3	4	5	4	4	3	4	4	3	4	3	4	3	5	4	3	4	3	5	4	3	5	4	4	3	4	5	4	3	4	3
655	2026/4/7 15:32:28	94秒	微信	N/A	223.99.163.165(山东-济南)	137	1	2	2	1	4	1	2	2	1	2	1	5	5	3	4	5	5	5	4	4	4	4	4	4	4	4	5	4	5	4	4	3	4	4	4	5	4	4	5	4	5	5	4
656	2026/4/7 15:32:39	108秒	微信	N/A	182.33.224.207(山东-潍坊)	180	1	2	2	1	4	1	1	4	2	2	1	5	6	6	5	4	5	4	5	7	6	5	5	6	7	6	6	6	5	7	6	5	5	7	5	5	7	6	5	5	6	7	5
657	2026/4/7 15:32:47	68秒	微信	N/A	39.144.109.167(山东-聊城)	153	1	2	2	1	4	2	2	2	2	2	1	5	5	5	5	5	5	5	5	5	4	5	5	5	4	5	5	5	5	5	5	5	4	5	4	5	4	5	4	4	5	5	5
658	2026/4/7 15:32:50	74秒	微信	N/A	223.104.195.123(山东-泰安)	160	1	2	1	1	2	1	1	2	2	3	1	5	5	5	5	5	5	5	5	5	5	5	5	5	5	5	5	5	5	5	5	5	5	5	5	5	5	5	5	5	5	5	5
659	2026/4/7 15:33:00	124秒	微信	N/A	223.104.194.140(山东-济南)	172	1	3	2	1	2	3	3	3	2	2	3	5	5	5	5	4	5	5	4	5	5	4	5	6	5	5	6	7	5	6	5	7	6	5	6	6	6	5	6	6	5	6	6
660	2026/4/7 15:33:02	124秒	微信	N/A	112.53.79.12(山东-济南)	159	2	2	3	1	4	1	2	2	2	1	3	5	5	4	5	6	5	6	4	6	5	4	4	5	4	5	5	5	5	6	5	5	4	5	5	5	5	6	5	4	5	5	6
661	2026/4/7 15:33:03	52秒	微信	N/A	223.99.163.166(山东-济南)	151	1	1	1	2	1	4	4	1	1	1	1	5	5	6	5	5	5	6	6	5	5	6	5	4	5	5	4	3	5	5	4	3	3	5	5	4	4	5	5	4	4	5	5
662	2026/4/7 15:33:08	109秒	微信	N/A	112.224.225.197(山东-济南)	136	2	2	2	1	2	2	1	3	2	1	1	7	4	3	3	4	4	3	5	4	4	5	5	4	4	4	4	4	4	4	4	5	5	3	3	4	4	4	6	4	5	5	5
663	2026/4/7 15:33:08	110秒	微信	N/A	182.33.220.134(山东-潍坊)	197	1	2	2	1	3	3	3	4	1	1	1	6	7	5	6	6	5	6	6	6	6	6	5	7	6	7	5	7	6	6	6	6	7	6	6	6	6	6	6	7	7	7	7
664	2026/4/7 15:33:10	81秒	微信	N/A	39.144.109.144(山东-聊城)	96	2	1	2	1	2	2	2	1	2	1	1	3	3	3	3	3	3	3	3	3	3	3	3	3	3	3	3	3	3	3	3	3	3	3	3	3	3	3	3	3	3	3	3
665	2026/4/7 15:33:22	156秒	微信	N/A	112.224.190.3(山东-济南)	173	1	2	2	1	4	1	1	3	1	2	1	5	4	4	3	7	7	7	7	7	7	7	4	5	5	5	5	7	4	5	4	3	7	7	7	5	5	5	5	5	5	5	5
666	2026/4/7 15:33:47	145秒	微信	N/A	112.224.219.136(山东-济南)	140	1	2	2	1	2	1	1	2	2	3	1	7	7	7	7	3	4	3	4	5	3	4	5	5	3	4	5	3	4	5	3	5	4	4	4	3	4	5	4	3	4	5	4
667	2026/4/7 15:35:13	67秒	微信	N/A	112.224.223.87(山东-济南)	160	1	2	1	1	2	2	2	5	2	2	4	5	5	5	5	5	5	5	5	5	5	5	5	5	5	5	5	5	5	5	5	5	5	5	5	5	5	5	5	5	5	5	5
668	2026/4/7 15:35:22	127秒	微信	N/A	39.144.109.167(山东-聊城)	174	1	2	5	1	4	1	1	2	1	1	3	7	6	5	7	4	4	6	5	6	6	5	4	5	5	5	6	5	5	6	5	6	5	4	5	5	7	7	7	6	5	5	5
669	2026/4/7 15:35:35	70秒	微信	N/A	112.224.141.51(山东-济南)	192	1	2	5	1	2	3	3	2	1	1	1	6	6	6	6	6	6	6	6	6	6	6	6	6	6	6	6	6	6	6	6	6	6	6	6	6	6	6	6	6	6	6	6
670	2026/4/7 15:35:36	70秒	微信	N/A	112.53.79.13(山东-济南)	172	2	2	2	1	1	3	3	3	2	3	1	5	5	5	5	3	3	3	3	4	4	4	4	6	6	6	6	6	6	6	6	6	6	6	6	6	6	6	6	7	7	7	7
671	2026/4/7 15:36:00	96秒	微信	N/A	223.104.194.186(山东-济南)	134	1	3	2	1	2	1	1	1	2	3	4	4	4	4	4	4	4	4	4	4	4	4	4	4	4	7	4	4	4	4	4	4	7	4	4	4	4	4	4	4	4	4	4
672	2026/4/7 15:36:29	463秒	微信	N/A	218.58.41.138(山东-济南)	94	2	2	2	1	2	2	2	3	2	3	4	3	1	3	5	4	5	4	6	4	5	5	4	2	4	4	5	4	3	2	1	1	2	3	2	2	2	2	2	1	1	1	1
673	2026/4/7 15:36:41	68秒	微信	N/A	39.144.109.170(山东-聊城)	128	1	2	3	1	2	1	1	1	1	1	1	4	4	4	4	4	4	4	4	4	4	4	4	4	4	4	4	4	4	4	4	4	4	4	4	4	4	4	4	4	4	4	4
674	2026/4/7 15:37:06	789秒	微信	N/A	112.224.225.147(山东-济南)	224	2	2	5	1	3	2	1	2	2	1	1	7	7	7	7	7	7	7	7	7	7	7	7	7	7	7	7	7	7	7	7	7	7	7	7	7	7	7	7	7	7	7	7
675	2026/4/7 15:37:12	77秒	微信	N/A	182.33.248.154(山东-潍坊)	215	1	2	5	1	2	2	2	3	2	2	1	7	7	1	7	7	7	7	4	7	7	7	7	7	7	7	7	7	7	7	7	7	7	7	7	7	7	7	7	7	7	7	7
676	2026/4/7 15:37:38	140秒	微信	N/A	39.144.109.179(山东-聊城)	177	2	2	2	1	4	1	2	2	1	1	1	5	7	4	6	4	4	5	4	4	6	6	6	5	7	6	6	7	4	5	5	6	4	5	7	6	6	7	7	6	6	5	6
677	2026/4/7 15:38:15	163秒	微信	N/A	223.99.163.164(山东-济南)	132	2	2	2	1	4	1	2	1	2	2	1	5	5	5	5	4	4	4	4	4	4	4	4	4	4	4	4	4	4	4	4	4	4	4	4	4	4	4	4	4	4	4	4
678	2026/4/7 15:39:07	103秒	微信	N/A	182.39.132.47(山东-枣庄)	139	2	2	2	1	2	1	1	3	2	1	1	4	5	5	5	5	5	5	3	4	3	5	3	3	5	3	4	5	3	4	5	6	3	5	4	5	3	4	4	5	4	6	6
679	2026/4/7 15:39:12	74秒	微信	N/A	112.224.191.161(山东-济南)	224	2	2	2	2	1	2	2	1	1	1	1	7	7	7	7	7	7	7	7	7	7	7	7	7	7	7	7	7	7	7	7	7	7	7	7	7	7	7	7	7	7	7	7
680	2026/4/7 15:39:12	56秒	微信	N/A	39.144.109.37(山东-聊城)	224	2	2	2	1	2	3	3	1	1	1	2	7	7	7	7	7	7	7	7	7	7	7	7	7	7	7	7	7	7	7	7	7	7	7	7	7	7	7	7	7	7	7	7
681	2026/4/7 15:39:17	64秒	微信	N/A	223.99.163.165(山东-济南)	157	2	2	2	1	2	2	3	5	2	2	1	7	7	6	4	7	5	5	7	6	4	5	4	4	4	4	4	6	4	5	4	5	5	4	3	6	5	4	5	5	5	4	4
682	2026/4/7 15:39:19	85秒	微信	N/A	39.144.109.169(山东-聊城)	149	2	1	1	1	4	1	1	5	1	1	1	7	7	7	7	7	7	7	4	4	4	4	4	4	4	4	4	4	4	4	4	4	4	4	4	4	4	4	4	4	4	4	4
683	2026/4/7 15:39:38	69秒	微信	N/A	39.144.109.187(山东-聊城)	128	2	2	2	1	2	2	2	2	2	2	2	4	4	4	4	4	4	4	4	4	4	4	4	4	4	4	4	4	4	4	4	4	4	4	4	4	4	4	4	4	4	4	4
684	2026/4/7 15:39:39	78秒	微信	N/A	112.230.183.130(山东-济南)	160	1	2	2	1	2	1	1	1	1	3	3	5	5	5	5	5	5	5	5	5	5	5	5	5	5	5	5	5	5	5	5	5	5	5	5	5	5	5	5	5	5	5	5
685	2026/4/7 15:39:39	87秒	微信	N/A	112.224.221.162(山东-济南)	153	2	2	2	2	4	1	1	2	2	3	1	5	5	5	5	5	5	5	4	5	5	4	5	5	4	5	4	5	4	5	3	5	5	5	5	5	5	5	5	5	5	5	5
686	2026/4/7 15:39:55	96秒	微信	N/A	223.104.194.185(山东-济南)	128	1	3	2	1	3	2	2	3	2	3	1	4	4	4	4	4	4	4	4	4	4	4	4	4	4	4	4	4	4	4	4	4	4	4	4	4	4	4	4	4	4	4	4
687	2026/4/7 15:40:15	136秒	微信	N/A	112.53.79.14(山东-济南)	158	1	2	2	1	1	3	3	5	2	2	3	7	5	5	5	6	4	5	5	4	5	4	5	5	5	5	5	5	5	4	5	4	6	4	6	5	4	5	5	5	5	5	5
688	2026/4/7 15:40:26	79秒	微信	N/A	112.224.219.187(山东-济南)	117	1	2	2	1	2	2	1	5	2	3	4	3	2	2	2	3	3	4	4	3	4	3	4	4	5	4	4	3	4	5	3	3	5	4	4	5	3	4	5	4	4	3	4
689	2026/4/7 15:40:30	140秒	微信	N/A	112.224.219.231(山东-济南)	159	1	2	2	1	2	1	1	3	1	2	4	5	5	5	5	5	5	5	5	5	5	5	5	5	4	5	6	5	5	4	5	5	4	5	6	5	5	4	5	5	5	5	6
690	2026/4/7 15:40:35	59秒	微信	N/A	223.99.163.165(山东-济南)	96	1	1	1	1	3	1	1	5	2	2	4	3	3	3	3	3	3	3	3	3	3	3	3	3	3	3	3	3	3	3	3	3	3	3	3	3	3	3	3	3	3	3	3
691	2026/4/7 15:40:39	205秒	微信	N/A	39.144.109.135(山东-聊城)	168	2	2	2	1	4	2	2	3	2	1	4	3	3	3	3	4	5	4	4	7	7	7	7	7	6	5	5	7	4	4	4	5	5	5	5	4	5	5	7	7	7	7	7
692	2026/4/7 15:40:42	74秒	微信	N/A	223.160.165.161(山东-济南)	158	2	2	5	1	3	1	1	1	1	1	1	4	5	4	4	4	2	5	4	5	4	4	6	5	6	6	6	5	5	5	5	5	5	5	5	6	5	5	6	5	5	6	6
693	2026/4/7 15:40:48	110秒	微信	N/A	112.53.79.12(山东-济南)	167	2	2	2	1	3	1	1	3	1	1	1	7	7	7	6	5	5	5	5	5	5	5	5	6	6	6	6	6	6	6	6	6	6	6	6	4	3	3	3	4	4	3	4
694	2026/4/7 15:40:56	158秒	微信	N/A	39.144.109.164(山东-聊城)	121	2	2	2	1	3	1	1	1	2	3	3	2	2	3	5	3	3	6	2	4	4	4	4	4	4	4	4	4	4	4	4	4	4	4	3	4	5	4	4	4	3	4	4
695	2026/4/7 15:41:24	68秒	微信	N/A	39.144.109.147(山东-聊城)	205	2	2	2	1	3	3	3	3	2	1	4	6	6	6	6	6	6	6	6	6	6	6	6	6	6	6	6	6	6	6	7	7	7	7	7	7	7	7	7	7	7	7	7
696	2026/4/7 15:41:38	183秒	微信	N/A	223.99.163.164(山东-济南)	184	2	3	2	1	4	3	2	1	1	1	1	7	4	7	5	6	6	6	6	6	6	6	6	6	5	6	6	6	6	6	5	5	6	6	6	6	5	5	5	6	6	5	6
697	2026/4/7 15:41:44	164秒	微信	N/A	39.144.109.129(山东-聊城)	168	2	2	2	1	4	1	1	5	2	2	1	4	5	4	5	3	3	5	5	5	5	6	5	6	6	7	7	7	4	7	6	3	6	3	5	5	6	7	7	5	5	5	6
698	2026/4/7 15:41:46	90秒	微信	N/A	39.144.109.130(山东-聊城)	107	1	2	3	1	4	1	1	5	2	2	2	2	4	4	2	4	2	4	4	2	4	4	4	4	2	4	2	4	2	4	2	4	3	4	3	4	2	4	3	4	4	4	4
699	2026/4/7 15:41:53	188秒	微信	N/A	223.104.194.173(山东-济南)	129	2	2	2	1	4	1	1	2	1	2	1	4	2	4	4	4	4	4	4	5	3	4	4	4	2	4	4	5	4	4	3	3	5	5	5	5	5	5	5	4	3	4	4
700	2026/4/7 15:44:30	165秒	微信	N/A	223.104.194.144(山东-济南)	58	2	2	2	1	4	1	1	3	1	3	1	2	1	1	6	1	1	7	1	1	1	1	2	4	2	1	2	2	1	2	1	1	1	1	1	1	1	1	3	2	2	2	2
701	2026/4/7 15:44:59	57秒	微信	N/A	112.224.141.142(山东-济南)	192	2	2	2	1	1	2	2	1	1	1	1	6	6	6	6	6	6	6	6	6	6	6	6	6	6	6	6	6	6	6	6	6	6	6	6	6	6	6	6	6	6	6	6
702	2026/4/7 15:44:59	87秒	微信	N/A	223.104.194.64(山东-济南)	152	2	2	3	1	4	2	2	1	1	1	3	5	5	5	5	4	4	4	4	5	5	5	5	5	5	5	5	5	5	5	5	4	4	4	4	5	5	5	5	5	5	5	5
703	2026/4/7 15:45:01	113秒	微信	N/A	112.53.79.13(山东-济南)	176	1	2	1	1	2	1	1	1	2	3	1	5	6	5	6	5	6	5	6	5	6	5	6	5	6	5	6	5	6	5	6	5	6	5	6	5	6	5	6	5	6	5	6
704	2026/4/7 15:45:11	1825秒	微信	N/A	112.224.161.249(山东-济南)	196	1	2	2	1	2	3	1	1	2	1	3	7	7	7	7	6	6	6	6	6	6	6	6	6	6	6	6	6	6	6	6	6	6	6	6	6	6	6	6	6	6	6	6
705	2026/4/7 15:45:27	113秒	微信	N/A	112.224.228.208(山东-济南)	116	2	2	2	1	4	1	1	3	2	3	4	4	4	4	4	4	4	4	4	4	4	4	4	4	4	4	4	4	4	4	4	4	4	4	4	1	1	1	1	4	4	4	4
706	2026/4/7 15:45:47	95秒	微信	N/A	112.53.79.12(山东-济南)	192	2	1	5	1	2	2	2	1	1	1	4	6	6	6	6	6	6	6	6	6	6	6	6	6	6	6	6	6	6	6	6	6	6	6	6	6	6	6	6	6	6	6	6
707	2026/4/7 15:46:45	106秒	微信	N/A	112.224.222.49(山东-济南)	224	1	2	1	1	3	1	1	3	2	1	1	7	7	7	7	7	7	7	7	7	7	7	7	7	7	7	7	7	7	7	7	7	7	7	7	7	7	7	7	7	7	7	7
708	2026/4/7 15:46:56	149秒	微信	N/A	144.12.60.236(山东-淄博)	183	2	3	2	1	3	1	2	2	2	1	1	7	4	6	6	5	6	7	7	6	5	6	7	5	5	5	5	7	7	7	5	1	7	4	5	6	6	6	6	6	6	6	6
709	2026/4/7 15:46:59	100秒	微信	N/A	223.104.194.190(山东-济南)	127	2	1	5	1	3	2	2	3	2	3	1	4	4	4	4	4	4	4	4	4	4	4	4	4	4	4	4	4	4	4	4	4	4	4	4	3	4	4	4	4	4	4	4
710	2026/4/7 15:47:19	111秒	微信	N/A	112.224.218.182(山东-济南)	104	2	2	2	1	4	2	1	3	2	2	1	7	7	4	1	4	4	4	4	6	5	4	5	3	4	3	3	3	3	3	3	2	2	2	2	2	2	2	2	2	2	2	2
711	2026/4/7 15:47:24	115秒	微信	N/A	223.104.194.167(山东-济南)	120	2	3	2	1	4	1	1	3	2	2	4	2	2	2	2	4	4	4	4	4	4	4	4	4	4	4	4	4	4	4	4	4	4	4	4	4	4	4	4	4	4	4	4
712	2026/4/7 15:47:37	89秒	微信	N/A	223.99.163.165(山东-济南)	162	2	2	3	1	4	2	2	1	2	1	3	6	6	5	5	5	5	5	5	5	5	5	5	5	5	5	5	5	5	5	5	5	5	5	5	5	5	5	5	5	5	5	5
713	2026/4/7 15:47:52	107秒	微信	N/A	112.224.219.29(山东-济南)	224	2	2	2	1	1	1	1	1	2	1	3	7	7	7	7	7	7	7	7	7	7	7	7	7	7	7	7	7	7	7	7	7	7	7	7	7	7	7	7	7	7	7	7
714	2026/4/7 15:48:04	58秒	微信	N/A	39.144.111.65(山东-济南)	224	2	1	5	2	4	1	1	1	2	3	4	7	7	7	7	7	7	7	7	7	7	7	7	7	7	7	7	7	7	7	7	7	7	7	7	7	7	7	7	7	7	7	7
715	2026/4/7 15:48:12	89秒	微信	N/A	223.104.194.134(山东-济南)	224	2	2	2	1	1	1	1	1	1	1	1	7	7	7	7	7	7	7	7	7	7	7	7	7	7	7	7	7	7	7	7	7	7	7	7	7	7	7	7	7	7	7	7
716	2026/4/7 15:48:13	67秒	微信	N/A	112.224.163.123(山东-济南)	224	2	3	2	1	4	1	1	2	1	2	1	7	7	7	7	7	7	7	7	7	7	7	7	7	7	7	7	7	7	7	7	7	7	7	7	7	7	7	7	7	7	7	7
717	2026/4/7 15:48:45	67秒	微信	N/A	112.232.212.76(山东-济南)	113	1	2	1	1	4	1	1	5	2	3	1	1	4	1	3	3	3	3	3	3	3	3	3	3	3	3	3	3	3	3	3	3	3	3	3	7	7	7	7	4	4	4	4
718	2026/4/7 15:49:35	94秒	微信	N/A	182.33.209.125(山东-潍坊)	188	1	2	3	1	2	3	3	5	1	2	1	6	7	7	5	6	5	6	7	6	5	6	5	7	6	6	6	7	6	7	6	6	5	6	6	6	5	5	5	6	6	5	5
719	2026/4/7 15:49:40	64秒	微信	N/A	112.53.79.13(山东-济南)	128	1	1	1	1	1	3	1	3	2	3	4	4	4	4	4	4	4	4	4	4	4	4	4	4	4	4	4	4	4	4	4	4	4	4	4	4	4	4	4	4	4	4	4
720	2026/4/7 15:50:52	167秒	微信	N/A	112.53.79.12(山东-济南)	192	2	2	2	2	4	1	1	1	1	1	1	6	6	6	6	6	6	6	6	6	6	6	6	6	6	6	6	6	6	6	6	6	6	6	6	6	6	6	6	6	6	6	6
721	2026/4/7 15:50:59	128秒	微信	N/A	112.224.220.130(山东-济南)	128	2	3	2	1	4	2	1	2	2	2	2	4	4	4	4	4	4	4	4	4	4	4	4	4	4	4	4	4	4	4	4	4	4	4	4	4	4	4	4	4	4	4	4
722	2026/4/7 15:55:24	61秒	微信	N/A	112.224.221.183(山东-济南)	128	2	2	2	1	4	2	1	5	2	3	1	4	4	4	4	4	4	4	4	4	4	4	4	4	4	4	4	4	4	4	4	4	4	4	4	4	4	4	4	4	4	4	4
723	2026/4/7 15:55:25	182秒	微信	N/A	112.224.162.154(山东-济南)	135	2	2	2	1	2	2	2	1	1	3	1	7	4	5	4	5	4	4	4	4	4	4	6	4	4	4	4	4	4	4	4	4	4	4	4	4	4	4	4	4	4	4	4
724	2026/4/7 15:56:11	150秒	微信	N/A	223.104.194.144(山东-济南)	121	2	1	2	1	2	1	2	1	1	1	1	7	3	4	7	7	7	4	6	3	3	3	5	4	2	1	3	4	7	4	3	1	6	2	2	3	3	2	2	2	2	4	5
725	2026/4/7 15:57:58	88秒	微信	N/A	182.33.149.159(山东-潍坊)	128	1	1	3	1	1	3	2	3	2	1	1	4	4	4	4	4	4	4	4	4	4	4	4	4	4	4	4	4	4	4	4	4	4	4	4	4	4	4	4	4	4	4	4
726	2026/4/7 16:00:13	68秒	微信	N/A	223.104.196.102(山东-济宁)	224	2	2	2	1	4	2	1	1	2	2	1	7	7	7	7	7	7	7	7	7	7	7	7	7	7	7	7	7	7	7	7	7	7	7	7	7	7	7	7	7	7	7	7
727	2026/4/7 16:02:07	173秒	微信	N/A	112.53.79.11(山东-济南)	132	2	1	5	1	3	1	1	1	2	1	1	3	4	4	4	4	4	4	4	4	4	4	4	4	4	4	4	6	5	5	4	4	4	4	4	5	4	4	4	4	4	4	4
728	2026/4/7 16:02:28	167秒	微信	N/A	123.233.72.46(山东-济南)	146	1	1	2	1	4	1	1	4	2	2	1	2	2	6	7	5	3	4	6	5	5	5	5	5	6	7	6	4	5	5	4	4	5	5	5	3	1	1	2	6	6	6	5
729	2026/4/7 16:03:32	85秒	微信	N/A	112.224.227.93(山东-济南)	196	1	3	2	1	4	1	1	4	2	3	1	7	7	7	7	6	6	6	6	6	6	6	6	6	6	6	6	6	6	6	6	6	6	6	6	6	6	6	6	6	6	6	6
730	2026/4/7 16:03:39	54秒	微信	N/A	112.224.205.0(山东-潍坊)	128	2	2	2	1	4	1	1	4	2	1	1	4	4	4	4	4	4	4	4	4	4	4	4	4	4	4	4	4	4	4	4	4	4	4	4	4	4	4	4	4	4	4	4
731	2026/4/7 16:04:25	106秒	微信	N/A	113.127.226.223(山东-济南)	120	1	2	1	1	4	1	1	2	2	2	1	4	3	5	4	2	2	2	4	2	4	4	4	4	4	4	4	4	4	4	4	4	4	4	4	4	4	4	4	4	4	4	4
732	2026/4/7 16:04:34	90秒	微信	N/A	223.104.194.166(山东-济南)	64	2	2	2	1	4	2	1	2	2	3	1	2	2	2	2	2	2	2	2	2	2	2	2	2	2	2	2	2	2	2	2	2	2	2	2	2	2	2	2	2	2	2	2
733	2026/4/7 16:06:53	79秒	微信	N/A	218.58.41.178(山东-济南)	128	2	3	5	1	4	2	2	3	1	2	1	4	4	4	4	4	4	4	4	4	4	4	4	4	4	4	4	4	4	4	4	4	4	4	4	4	4	4	4	4	4	4	4
734	2026/4/7 16:06:55	118秒	微信	N/A	39.144.109.147(山东-聊城)	145	2	2	2	1	4	1	1	3	2	2	1	5	5	5	5	4	5	4	4	4	4	3	3	4	4	5	4	6	4	5	4	4	5	4	5	5	5	5	6	5	5	4	5
735	2026/4/7 16:07:28	171秒	微信	N/A	223.104.194.155(山东-济南)	166	2	2	2	1	4	2	1	3	2	3	1	7	7	6	5	3	2	5	5	4	5	6	7	6	6	6	5	6	5	6	5	4	5	5	6	5	5	5	5	5	5	5	4
736	2026/4/7 16:07:30	180秒	微信	N/A	223.104.194.148(山东-济南)	202	2	2	5	1	4	2	2	2	1	1	1	5	5	5	5	5	7	7	6	5	5	5	5	6	6	6	7	7	7	7	7	7	7	7	7	7	7	7	7	7	7	7	7
737	2026/4/7 16:07:45	83秒	微信	N/A	39.144.109.137(山东-聊城)	224	1	3	2	1	1	2	2	3	2	1	1	7	7	7	7	7	7	7	7	7	7	7	7	7	7	7	7	7	7	7	7	7	7	7	7	7	7	7	7	7	7	7	7
738	2026/4/7 16:09:01	58秒	微信	N/A	112.224.228.41(山东-济南)	130	1	2	1	1	4	1	1	5	2	3	1	4	4	4	4	4	4	4	4	4	4	4	4	4	4	4	4	4	4	4	4	5	4	4	4	4	4	4	4	4	5	4	4
739	2026/4/7 16:09:35	66秒	微信	N/A	223.104.194.167(山东-济南)	192	1	3	2	1	2	1	1	1	1	1	1	6	6	6	6	6	6	6	6	6	6	6	6	6	6	6	6	6	6	6	6	6	6	6	6	6	6	6	6	6	6	6	6
740	2026/4/7 16:10:11	88秒	微信	N/A	39.144.109.141(山东-聊城)	160	1	2	5	1	3	1	2	5	1	1	4	5	5	5	5	5	5	5	5	5	5	5	5	5	5	5	5	5	5	5	5	5	5	5	5	5	5	5	5	5	5	5	5
741	2026/4/7 16:10:50	48秒	微信	N/A	223.104.195.195(山东-泰安)	224	2	2	1	2	2	2	2	2	2	2	2	7	7	7	7	7	7	7	7	7	7	7	7	7	7	7	7	7	7	7	7	7	7	7	7	7	7	7	7	7	7	7	7
742	2026/4/7 16:11:00	45秒	微信	N/A	112.53.79.12(山东-济南)	115	1	3	2	1	3	4	4	2	2	1	4	7	2	2	6	6	1	6	2	2	2	5	4	4	4	4	4	4	4	4	4	5	3	3	4	2	2	2	2	2	5	2	6
743	2026/4/7 16:11:47	59秒	微信	N/A	39.144.109.191(山东-聊城)	133	2	1	5	1	3	2	2	4	2	3	3	1	6	5	1	6	6	4	1	6	5	1	6	5	5	5	2	6	6	5	5	6	5	4	5	6	5	1	1	6	5	1	1
744	2026/4/7 16:11:51	218秒	微信	N/A	218.58.41.163(山东-济南)	121	2	1	2	1	2	1	1	3	2	2	1	5	4	3	3	3	3	3	3	3	3	3	3	3	4	4	4	4	3	2	3	3	3	3	3	5	6	6	6	5	5	5	5
745	2026/4/7 16:13:17	57秒	微信	N/A	112.224.162.176(山东-济南)	180	1	3	2	2	2	4	4	4	1	1	1	6	6	6	7	7	5	5	6	5	6	5	6	5	6	5	6	6	5	6	5	5	6	5	6	6	5	6	5	6	5	6	5
746	2026/4/7 16:14:22	146秒	微信	N/A	223.99.163.164(山东-济南)	224	1	2	3	1	2	4	4	1	2	1	3	7	7	7	7	7	7	7	7	7	7	7	7	7	7	7	7	7	7	7	7	7	7	7	7	7	7	7	7	7	7	7	7
747	2026/4/7 16:14:47	63秒	微信	N/A	39.144.109.147(山东-聊城)	224	1	2	3	1	2	2	2	4	1	1	1	7	7	7	7	7	7	7	7	7	7	7	7	7	7	7	7	7	7	7	7	7	7	7	7	7	7	7	7	7	7	7	7
748	2026/4/7 16:15:15	57秒	微信	N/A	223.99.163.165(山东-济南)	219	1	3	2	1	4	1	1	5	1	1	1	7	7	7	7	7	7	7	7	7	7	7	7	7	7	7	7	6	6	6	6	6	7	7	7	7	7	7	7	7	7	7	7
749	2026/4/7 16:16:04	90秒	微信	N/A	112.230.217.255(山东-济南)	187	2	2	2	1	2	1	1	2	1	1	3	7	7	7	7	7	7	7	7	7	7	7	5	4	4	4	4	4	4	4	5	6	5	6	5	6	6	7	6	7	6	5	7
750	2026/4/7 16:16:12	219秒	微信	N/A	112.53.79.13(山东-济南)	144	1	3	5	1	4	1	1	4	1	2	1	5	6	5	6	4	5	4	5	5	5	3	5	4	4	6	5	5	5	4	3	3	5	4	3	5	6	5	5	3	4	4	3
751	2026/4/7 16:17:07	77秒	微信	N/A	39.144.109.189(山东-聊城)	157	2	2	1	1	2	1	1	3	1	1	1	5	5	5	6	5	5	5	5	5	5	5	5	5	5	5	5	4	4	4	4	4	4	4	4	5	5	5	5	6	6	6	6
752	2026/4/7 16:19:09	202秒	微信	N/A	112.224.160.15(山东-济南)	168	2	2	3	1	3	1	1	2	2	2	1	5	5	6	5	5	6	6	6	5	6	5	5	6	6	5	6	6	5	5	5	4	5	4	5	5	5	5	5	6	5	5	5
753	2026/4/7 16:19:39	112秒	微信	N/A	39.144.109.181(山东-聊城)	128	1	3	2	1	4	1	1	2	1	2	1	4	4	4	4	4	4	4	4	4	4	4	4	4	4	4	4	4	4	4	4	4	4	4	4	4	4	4	4	4	4	4	4
754	2026/4/7 16:21:03	82秒	微信	N/A	112.53.79.14(山东-济南)	96	2	2	2	1	4	1	1	4	2	3	4	2	2	2	2	2	2	3	4	4	3	4	4	2	2	3	4	3	4	4	3	2	3	2	3	2	3	4	4	3	3	4	4
755	2026/4/7 16:22:19	85秒	微信	N/A	112.53.79.14(山东-济南)	192	2	2	5	2	3	2	2	1	1	1	3	6	6	6	6	6	6	6	5	6	6	6	6	6	6	6	6	6	6	6	6	6	6	7	6	6	6	6	6	6	6	6	6
756	2026/4/7 16:23:07	570秒	微信	N/A	223.99.163.164(山东-济南)	192	1	1	1	1	2	1	1	3	2	2	1	6	6	6	6	6	6	6	6	6	6	6	6	6	6	6	6	6	6	6	6	6	6	6	6	6	6	6	6	6	6	6	6
757	2026/4/7 16:23:21	255秒	微信	N/A	182.39.95.204(山东-聊城)	125	2	3	2	1	4	1	3	5	2	1	1	2	3	5	4	4	3	4	4	5	5	4	4	4	3	4	4	4	3	4	4	3	5	4	3	4	4	4	4	5	4	4	4
758	2026/4/7 16:23:46	136秒	微信	N/A	218.58.41.225(山东-济南)	83	1	1	1	2	2	1	1	4	1	2	1	3	3	3	3	3	3	3	3	3	3	3	3	3	2	3	2	2	2	2	2	2	2	2	4	2	2	3	5	2	1	2	2
759	2026/4/7 16:23:48	90秒	微信	N/A	223.104.194.187(山东-济南)	224	1	1	1	1	4	2	1	1	2	2	1	7	7	7	7	7	7	7	7	7	7	7	7	7	7	7	7	7	7	7	7	7	7	7	7	7	7	7	7	7	7	7	7
760	2026/4/7 16:25:03	465秒	微信	N/A	144.12.215.166(山东-滨州)	128	2	2	2	1	3	1	1	1	2	3	1	6	4	3	3	3	3	4	3	5	4	3	3	3	3	5	5	4	4	4	4	3	6	6	4	4	4	4	5	4	4	4	4
761	2026/4/7 16:25:22	98秒	微信	N/A	223.104.194.109(山东-济南)	160	2	1	2	1	4	2	2	2	2	3	1	5	5	5	5	5	5	5	5	5	5	5	5	5	5	5	5	5	5	5	5	5	5	5	5	5	5	5	5	5	5	5	5
762	2026/4/7 16:25:43	92秒	微信	N/A	112.224.163.103(山东-济南)	151	2	1	2	1	2	2	1	1	1	1	3	5	7	3	3	5	5	5	4	5	5	5	5	3	3	4	5	5	5	5	5	5	5	5	5	5	5	4	5	5	3	6	6
763	2026/4/7 16:25:51	99秒	微信	N/A	223.104.194.137(山东-济南)	224	1	1	5	1	4	1	2	3	2	2	1	7	7	7	7	7	7	7	7	7	7	7	7	7	7	7	7	7	7	7	7	7	7	7	7	7	7	7	7	7	7	7	7
764	2026/4/7 16:26:13	61秒	微信	N/A	223.104.194.182(山东-济南)	128	2	1	1	1	1	2	2	2	2	1	1	4	4	4	4	4	4	4	4	4	4	4	4	4	4	4	4	4	4	4	4	4	4	4	4	4	4	4	4	4	4	4	4
765	2026/4/7 16:26:16	80秒	微信	N/A	112.53.79.14(山东-济南)	131	1	3	1	2	2	2	2	3	2	2	1	7	4	4	4	4	4	4	4	4	4	4	4	4	4	4	4	4	4	4	4	4	4	4	4	4	4	4	4	4	4	4	4
766	2026/4/7 16:26:20	44秒	微信	N/A	223.99.163.166(山东-济南)	224	1	1	2	1	3	3	1	3	1	1	1	7	7	7	7	7	7	7	7	7	7	7	7	7	7	7	7	7	7	7	7	7	7	7	7	7	7	7	7	7	7	7	7
767	2026/4/7 16:26:20	133秒	微信	N/A	112.224.219.213(山东-济南)	162	2	1	2	1	2	2	1	2	1	1	1	5	5	5	5	5	5	5	5	5	5	5	5	5	5	5	5	5	5	5	5	5	5	5	5	5	7	5	5	5	5	5	5
768	2026/4/7 16:26:30	94秒	微信	N/A	144.12.163.234(山东-聊城)	224	2	1	5	1	4	1	1	1	2	2	1	7	7	7	7	7	7	7	7	7	7	7	7	7	7	7	7	7	7	7	7	7	7	7	7	7	7	7	7	7	7	7	7
769	2026/4/7 16:26:40	118秒	微信	N/A	223.104.194.152(山东-济南)	222	2	1	2	1	2	1	1	1	2	1	1	7	5	7	7	7	7	7	7	7	7	7	7	7	7	7	7	7	7	7	7	7	7	7	7	7	7	7	7	7	7	7	7
770	2026/4/7 16:26:46	152秒	微信	N/A	39.144.109.152(山东-聊城)	95	2	1	2	1	4	1	1	5	2	1	1	3	3	3	3	3	3	3	3	3	3	3	3	3	3	3	3	3	3	3	2	3	3	3	3	3	3	3	3	3	3	3	3
771	2026/4/7 16:27:00	157秒	微信	N/A	223.99.163.165(山东-济南)	215	2	1	2	1	4	1	1	1	2	1	1	7	6	6	6	6	6	6	6	7	7	7	7	7	7	7	7	7	7	7	7	7	7	5	7	7	7	7	7	7	7	7	7
772	2026/4/7 16:27:58	233秒	微信	N/A	112.224.218.153(山东-济南)	128	1	1	1	1	2	2	2	1	1	2	1	4	4	4	4	4	4	4	4	4	4	4	4	4	4	4	4	4	4	4	4	4	4	4	4	4	4	4	4	4	4	4	4
773	2026/4/7 16:30:18	40秒	微信	N/A	112.53.79.14(山东-济南)	171	1	1	1	2	2	4	4	4	2	2	2	7	6	7	6	5	5	6	7	6	4	5	5	7	5	3	5	6	5	5	6	6	6	5	5	6	5	5	6	1	7	7	1
774	2026/4/7 16:30:41	61秒	微信	N/A	112.36.205.2(山东-济南)	128	2	1	1	1	1	1	1	1	2	1	1	4	4	4	4	4	4	4	4	4	4	4	4	4	4	4	4	4	4	4	4	4	4	4	4	4	4	4	4	4	4	4	4
775	2026/4/7 16:31:46	128秒	微信	N/A	39.144.109.137(山东-聊城)	149	2	2	2	1	4	1	1	1	2	1	1	7	7	7	7	6	6	6	6	5	5	5	5	4	4	4	4	7	6	5	4	4	7	5	7	2	1	1	1	2	3	3	3
776	2026/4/7 16:33:53	271秒	微信	N/A	39.144.109.144(山东-聊城)	215	2	2	2	1	4	1	1	3	2	1	3	7	3	7	7	7	7	7	7	7	7	7	7	7	2	7	7	7	7	7	7	7	7	7	7	7	7	7	7	7	7	7	7
777	2026/4/7 16:34:38	84秒	微信	N/A	223.104.194.172(山东-济南)	224	1	2	2	2	4	2	1	1	2	2	1	7	7	7	7	7	7	7	7	7	7	7	7	7	7	7	7	7	7	7	7	7	7	7	7	7	7	7	7	7	7	7	7
778	2026/4/7 16:34:42	188秒	微信	N/A	39.144.109.173(山东-聊城)	202	2	1	5	1	4	1	1	5	2	1	1	7	7	7	7	7	7	7	7	7	7	6	7	5	5	6	6	7	4	7	5	5	6	6	7	7	7	7	7	7	6	6	3
779	2026/4/7 16:34:48	82秒	微信	N/A	112.224.192.114(山东-济南)	166	2	4	2	1	2	2	1	3	1	1	3	5	5	5	6	6	6	6	4	5	4	4	5	6	6	6	6	6	4	5	5	5	4	4	5	6	6	6	6	5	4	5	5
780	2026/4/7 16:34:53	73秒	微信	N/A	182.33.6.199(山东-济宁)	224	2	4	5	2	4	4	4	5	2	3	3	7	7	7	7	7	7	7	7	7	7	7	7	7	7	7	7	7	7	7	7	7	7	7	7	7	7	7	7	7	7	7	7
781	2026/4/7 16:35:28	126秒	微信	N/A	112.224.227.144(山东-济南)	170	2	4	2	1	4	1	1	2	2	2	3	5	5	5	6	5	6	5	4	3	4	4	5	5	4	4	5	6	5	6	6	6	6	6	6	6	6	6	6	6	6	6	6
782	2026/4/7 16:36:01	40秒	微信	N/A	112.224.226.209(山东-济南)	223	2	2	1	1	1	1	1	1	1	1	1	7	7	7	7	7	7	7	7	7	7	7	7	7	7	7	7	7	7	7	7	7	7	7	7	7	7	7	7	7	6	7	7
783	2026/4/7 16:36:07	152秒	微信	N/A	39.144.109.180(山东-聊城)	224	2	1	5	1	4	2	1	3	2	3	1	7	7	7	7	7	7	7	7	7	7	7	7	7	7	7	7	7	7	7	7	7	7	7	7	7	7	7	7	7	7	7	7
784	2026/4/7 16:36:25	185秒	微信	N/A	223.96.100.192(山东-东营)	192	2	4	2	1	2	2	1	1	1	1	3	7	6	4	6	5	5	5	4	5	6	6	7	7	6	6	5	6	7	7	7	6	5	6	7	6	7	5	6	7	7	6	7
785	2026/4/7 16:36:31	136秒	微信	N/A	112.53.79.14(山东-济南)	224	1	1	5	1	2	2	1	2	2	1	1	7	7	7	7	7	7	7	7	7	7	7	7	7	7	7	7	7	7	7	7	7	7	7	7	7	7	7	7	7	7	7	7
786	2026/4/7 16:36:34	156秒	微信	N/A	223.104.194.145(山东-济南)	224	2	1	3	1	4	1	1	1	1	1	4	7	7	7	7	7	7	7	7	7	7	7	7	7	7	7	7	7	7	7	7	7	7	7	7	7	7	7	7	7	7	7	7
787	2026/4/7 16:36:37	397秒	微信	N/A	223.104.194.182(山东-济南)	68	1	2	1	1	4	1	1	1	1	3	1	3	3	3	3	2	2	2	2	2	2	2	2	2	2	2	2	2	2	2	2	2	2	2	2	2	2	2	2	2	2	2	2
788	2026/4/7 16:36:53	142秒	微信	N/A	119.166.23.35(山东-青岛)	176	2	4	2	1	4	1	1	2	2	2	2	5	6	5	5	6	6	5	5	5	5	5	6	6	5	5	6	7	5	5	5	5	6	6	7	6	6	6	6	5	5	5	5
789	2026/4/7 16:36:56	92秒	微信	N/A	223.104.194.143(山东-济南)	193	2	3	2	1	4	1	1	2	2	1	1	6	6	6	5	5	5	6	6	6	6	6	6	6	6	6	6	6	6	6	6	6	6	6	6	7	6	7	6	7	6	7	6
790	2026/4/7 16:37:09	70秒	微信	N/A	182.33.45.205(山东-济宁)	198	2	3	2	1	4	1	1	3	2	3	1	6	6	6	5	6	7	7	6	6	6	6	7	6	6	6	7	6	6	6	6	7	6	6	6	6	6	7	6	6	7	6	6
791	2026/4/7 16:37:21	96秒	微信	N/A	39.144.109.146(山东-聊城)	128	1	1	5	1	2	2	2	3	2	3	4	4	2	2	2	5	5	5	4	5	4	4	4	3	4	5	4	4	3	4	5	3	4	5	6	4	4	4	4	4	4	4	4
792	2026/4/7 16:37:35	104秒	微信	N/A	39.144.109.139(山东-聊城)	166	2	3	2	1	4	3	2	3	2	1	3	5	5	5	4	5	5	5	6	6	5	6	4	5	6	5	5	5	5	5	5	5	5	5	5	6	5	6	5	6	5	6	5
793	2026/4/7 16:37:56	161秒	微信	N/A	112.224.224.75(山东-济南)	160	1	2	2	1	4	1	1	4	2	2	1	5	5	5	5	5	5	5	5	5	5	5	5	5	5	5	5	5	5	5	5	5	5	5	5	5	5	5	5	5	5	5	5
794	2026/4/7 16:38:00	5408秒	微信	N/A	39.144.109.139(山东-聊城)	188	2	1	2	1	2	2	1	1	2	2	4	4	4	4	4	2	3	4	4	6	6	4	4	7	7	6	7	7	7	7	7	7	7	7	7	7	7	7	7	7	7	7	7
795	2026/4/7 16:38:01	102秒	微信	N/A	112.224.225.34(山东-济南)	73	1	1	1	1	3	2	2	5	2	2	4	2	2	2	2	2	2	2	2	2	2	2	2	2	3	3	2	2	3	3	2	2	2	2	3	2	3	3	2	2	3	3	2
796	2026/4/7 16:38:06	95秒	微信	N/A	39.144.109.147(山东-聊城)	128	1	1	1	1	2	3	1	5	2	2	1	4	4	4	4	4	4	4	4	4	4	4	4	4	4	4	4	4	4	4	4	4	4	4	4	4	4	4	4	4	4	4	4
797	2026/4/7 16:38:13	104秒	微信	N/A	223.99.163.164(山东-济南)	212	2	4	2	1	2	1	1	1	2	3	1	6	6	7	6	6	6	6	6	7	7	6	7	6	7	6	7	6	7	7	6	7	7	7	7	7	7	7	7	7	7	7	7
798	2026/4/7 16:38:35	88秒	微信	N/A	39.144.109.185(山东-聊城)	160	2	2	2	1	2	2	2	2	2	1	1	5	5	5	5	5	5	5	5	5	5	5	5	5	5	5	5	5	5	5	5	5	5	5	5	5	5	5	5	5	5	5	5
799	2026/4/7 16:38:37	189秒	微信	N/A	112.224.190.114(山东-济南)	125	1	1	5	2	2	1	1	1	2	2	4	2	2	4	4	5	4	2	3	4	4	5	4	4	5	3	5	4	3	5	5	3	4	4	3	4	4	5	5	4	5	4	3
800	2026/4/7 16:38:45	93秒	微信	N/A	112.224.227.6(山东-济南)	224	2	1	3	1	2	3	3	1	2	1	4	7	7	7	7	7	7	7	7	7	7	7	7	7	7	7	7	7	7	7	7	7	7	7	7	7	7	7	7	7	7	7	7
801	2026/4/7 16:38:46	111秒	微信	N/A	223.104.194.135(山东-济南)	128	2	2	2	1	2	2	2	1	1	2	1	4	4	4	4	4	4	4	4	4	4	4	4	4	4	4	4	4	4	4	4	4	4	4	4	4	4	4	4	4	4	4	4
802	2026/4/7 16:39:01	118秒	微信	N/A	223.99.163.166(山东-济南)	128	2	2	2	1	4	2	2	1	2	1	1	4	4	4	4	4	4	4	4	4	4	4	4	4	4	4	4	4	4	4	4	4	4	4	4	4	4	4	4	4	4	4	4
803	2026/4/7 16:39:09	81秒	微信	N/A	223.104.196.26(山东-济宁)	190	1	1	1	1	2	3	3	1	2	1	2	5	4	6	6	6	6	6	6	6	6	6	6	6	6	6	6	6	6	6	6	6	6	6	6	6	6	6	6	6	6	6	7
804	2026/4/7 16:39:17	93秒	微信	N/A	223.99.163.164(山东-济南)	141	2	3	2	1	2	1	1	3	1	2	1	2	2	2	2	2	2	3	3	6	5	5	5	4	4	4	5	4	6	6	7	7	4	6	5	5	5	5	5	5	6	4	5
805	2026/4/7 16:39:24	138秒	微信	N/A	182.39.68.163(山东-聊城)	116	2	1	3	1	3	2	1	1	2	2	1	3	2	4	3	4	4	4	4	3	4	4	4	4	4	4	4	4	3	4	4	2	3	2	3	4	3	4	4	5	4	4	4
806	2026/4/7 16:39:29	71秒	微信	N/A	39.144.109.157(山东-聊城)	96	2	2	2	1	2	3	3	2	2	2	1	3	3	3	3	3	3	3	3	3	3	3	3	3	3	3	3	3	3	3	3	3	3	3	3	3	3	3	3	3	3	3	3
807	2026/4/7 16:39:33	111秒	微信	N/A	39.144.109.177(山东-聊城)	203	2	2	2	1	2	1	1	3	2	1	4	7	7	7	7	7	6	6	5	7	6	6	6	6	7	6	7	7	6	7	6	6	6	6	6	6	6	6	6	7	6	6	7
808	2026/4/7 16:39:34	69秒	微信	N/A	223.160.164.230(山东-济南)	224	2	1	5	1	1	1	1	4	2	2	4	7	7	7	7	7	7	7	7	7	7	7	7	7	7	7	7	7	7	7	7	7	7	7	7	7	7	7	7	7	7	7	7
809	2026/4/7 16:39:36	66秒	微信	N/A	39.144.109.172(山东-聊城)	140	1	1	1	1	1	2	1	5	2	3	1	7	7	7	7	4	4	4	4	4	4	4	4	4	4	4	4	4	4	4	4	4	4	4	4	4	4	4	4	4	4	4	4
810	2026/4/7 16:39:41	210秒	微信	N/A	112.224.223.7(山东-济南)	160	1	1	3	1	2	3	3	1	1	3	4	5	5	5	5	5	5	5	5	5	5	5	5	5	5	5	5	5	5	5	5	5	5	5	5	5	5	5	5	5	5	5	5
811	2026/4/7 16:39:45	143秒	微信	N/A	39.144.109.175(山东-聊城)	168	2	1	5	2	2	1	1	2	2	1	4	6	5	4	4	4	6	6	4	5	6	4	6	5	6	4	6	5	6	4	6	5	6	5	6	6	5	6	6	5	5	6	5
812	2026/4/7 16:39:47	161秒	微信	N/A	223.104.194.174(山东-济南)	180	2	1	5	2	2	1	1	1	1	1	4	6	6	6	6	6	6	6	6	6	6	6	6	6	5	6	5	5	6	5	6	5	6	5	7	5	4	6	4	6	5	6	5
813	2026/4/7 16:39:51	127秒	微信	N/A	223.104.194.155(山东-济南)	181	2	1	3	2	2	2	2	3	1	1	3	6	6	6	6	6	6	6	6	6	6	5	5	5	4	5	6	6	6	6	6	6	6	5	6	6	4	6	5	5	6	6	6
814	2026/4/7 16:40:07	234秒	微信	N/A	39.144.109.146(山东-聊城)	182	2	1	2	1	2	3	2	1	1	1	1	6	2	6	7	4	4	4	5	6	6	6	6	6	6	6	6	6	6	6	6	6	6	6	6	6	6	6	6	6	6	6	6
815	2026/4/7 16:40:22	96秒	微信	N/A	223.99.163.166(山东-济南)	224	2	1	5	1	1	1	1	1	1	1	4	7	7	7	7	7	7	7	7	7	7	7	7	7	7	7	7	7	7	7	7	7	7	7	7	7	7	7	7	7	7	7	7
816	2026/4/7 16:40:29	353秒	微信	N/A	223.104.194.163(山东-济南)	148	1	2	2	1	4	2	1	3	2	3	4	4	4	4	7	4	4	4	4	2	6	2	6	5	5	5	5	6	5	5	5	2	6	2	2	6	6	6	6	5	5	5	5
817	2026/4/7 16:40:51	66秒	微信	N/A	223.104.194.177(山东-济南)	128	2	1	2	1	2	3	3	1	1	1	1	4	4	4	4	4	4	4	4	4	4	4	4	4	4	4	4	4	4	4	4	4	4	4	4	4	4	4	4	4	4	4	4
818	2026/4/7 16:41:03	78秒	微信	N/A	39.144.109.167(山东-聊城)	224	2	1	2	1	4	1	2	1	1	1	1	7	7	7	7	7	7	7	7	7	7	7	7	7	7	7	7	7	7	7	7	7	7	7	7	7	7	7	7	7	7	7	7
819	2026/4/7 16:41:03	1817秒	微信	N/A	223.104.194.135(山东-济南)	131	2	1	2	1	3	1	1	3	2	1	1	7	4	4	4	4	4	4	4	4	4	4	4	4	4	4	4	4	4	4	4	4	4	4	4	4	4	4	4	4	4	4	4
820	2026/4/7 16:41:12	86秒	微信	N/A	223.99.163.164(山东-济南)	55	2	3	5	1	4	1	1	4	2	2	4	2	1	2	2	1	2	1	2	2	1	1	2	2	1	1	2	2	1	2	2	2	2	1	2	2	2	2	2	2	2	2	2
821	2026/4/7 16:41:12	77秒	微信	N/A	39.144.109.153(山东-聊城)	96	2	1	1	1	3	1	1	4	1	1	4	3	3	3	3	3	3	3	3	3	3	3	3	3	3	3	3	3	3	3	3	3	3	3	3	3	3	3	3	3	3	3	3
822	2026/4/7 16:41:16	99秒	微信	N/A	223.99.163.164(山东-济南)	162	2	3	2	1	4	1	1	2	2	1	2	5	4	5	5	5	5	6	5	5	6	5	6	5	5	5	5	5	5	5	5	5	5	5	5	5	5	5	5	5	5	5	5
823	2026/4/7 16:41:18	101秒	微信	N/A	123.233.72.129(山东-济南)	176	2	1	5	1	2	2	2	2	1	1	1	5	6	5	6	5	6	5	6	5	6	5	6	5	6	5	6	5	6	5	6	5	6	5	6	5	6	5	6	5	6	5	6
824	2026/4/7 16:41:19	112秒	微信	N/A	223.104.194.185(山东-济南)	184	2	1	2	1	2	2	2	1	1	1	1	5	5	6	6	5	5	5	5	6	6	6	6	6	6	6	5	6	6	6	6	6	6	6	6	6	6	5	6	6	6	6	6
825	2026/4/7 16:41:40	143秒	微信	N/A	223.99.163.164(山东-济南)	96	2	1	5	1	4	1	1	2	2	2	4	3	3	3	3	3	3	3	3	3	3	3	3	3	3	3	3	3	3	3	3	3	3	3	3	3	3	3	3	3	3	3	3
826	2026/4/7 16:41:46	60秒	微信	N/A	39.144.109.155(山东-聊城)	122	2	3	2	1	3	1	1	2	2	2	1	3	3	3	3	3	3	4	4	4	4	4	4	4	4	4	4	4	4	4	4	4	4	4	4	4	4	4	4	4	4	4	4
827	2026/4/7 16:41:47	104秒	微信	N/A	182.39.145.207(山东-枣庄)	224	1	1	3	2	4	1	1	3	1	2	1	7	7	7	7	7	7	7	7	7	7	7	7	7	7	7	7	7	7	7	7	7	7	7	7	7	7	7	7	7	7	7	7
828	2026/4/7 16:41:51	227秒	微信	N/A	112.224.190.171(山东-济南)	112	1	1	1	1	4	1	1	1	1	3	1	5	2	2	2	4	3	3	3	5	4	4	4	3	3	3	3	4	4	4	4	2	4	4	4	4	4	4	3	3	3	3	5
829	2026/4/7 16:41:53	142秒	微信	N/A	39.144.109.146(山东-聊城)	155	2	1	5	1	2	2	3	1	2	1	4	5	3	5	5	5	5	5	5	5	5	5	5	5	5	5	5	6	5	6	3	2	4	5	6	5	5	5	5	5	5	5	5
830	2026/4/7 16:41:59	92秒	微信	N/A	223.104.194.176(山东-济南)	224	2	1	3	1	2	4	4	1	2	1	4	7	7	7	7	7	7	7	7	7	7	7	7	7	7	7	7	7	7	7	7	7	7	7	7	7	7	7	7	7	7	7	7
831	2026/4/7 16:41:59	83秒	微信	N/A	39.144.109.183(山东-聊城)	220	2	1	3	1	2	3	1	1	1	1	1	7	7	7	7	7	7	7	7	7	7	5	7	7	7	7	7	7	7	7	7	7	7	7	7	7	7	5	7	7	7	7	7
832	2026/4/7 16:42:02	82秒	微信	N/A	39.144.109.140(山东-聊城)	224	2	1	2	1	4	1	1	1	2	1	4	7	7	7	7	7	7	7	7	7	7	7	7	7	7	7	7	7	7	7	7	7	7	7	7	7	7	7	7	7	7	7	7
833	2026/4/7 16:42:06	112秒	微信	N/A	223.104.194.162(山东-济南)	128	1	1	2	1	1	2	2	4	1	3	1	4	4	4	4	4	4	4	4	4	4	4	4	4	4	4	4	4	4	4	4	4	4	4	4	4	4	4	4	4	4	4	4
834	2026/4/7 16:42:16	194秒	微信	N/A	223.104.194.180(山东-济南)	211	1	1	2	1	4	1	1	1	1	1	4	7	7	7	7	7	7	7	7	7	7	7	7	7	5	7	7	7	7	7	7	5	7	7	7	6	7	7	7	6	5	5	4
835	2026/4/7 16:42:20	158秒	微信	N/A	39.144.109.190(山东-聊城)	139	2	1	2	1	2	2	1	1	1	2	4	4	2	3	3	4	4	4	5	5	5	5	6	5	5	5	6	5	6	5	4	2	4	3	2	5	4	5	4	5	5	4	5
836	2026/4/7 16:42:21	153秒	微信	N/A	223.104.194.128(山东-济南)	128	1	1	1	1	3	3	1	5	2	2	1	4	2	3	6	4	4	4	4	4	4	4	4	5	4	4	3	4	3	4	2	4	4	4	4	5	5	5	5	4	3	4	5
837	2026/4/7 16:42:25	92秒	微信	N/A	112.224.220.184(山东-济南)	224	2	1	5	2	3	2	2	4	2	1	1	7	7	7	7	7	7	7	7	7	7	7	7	7	7	7	7	7	7	7	7	7	7	7	7	7	7	7	7	7	7	7	7
838	2026/4/7 16:42:26	91秒	微信	N/A	223.99.163.166(山东-济南)	128	2	1	5	1	3	1	1	2	2	2	1	4	4	4	4	4	4	4	4	4	4	4	4	4	4	4	4	4	4	4	4	4	4	4	4	4	4	4	4	4	4	4	4
839	2026/4/7 16:42:26	239秒	微信	N/A	223.104.194.172(山东-济南)	172	2	1	2	1	2	2	2	1	2	2	1	5	5	5	5	5	5	5	5	5	5	5	5	6	4	6	5	6	5	5	5	4	5	5	5	6	7	7	7	6	6	6	6
840	2026/4/7 16:42:37	233秒	微信	N/A	223.104.194.142(山东-济南)	172	1	1	1	1	4	2	2	1	1	2	3	5	5	5	5	6	6	6	6	6	6	6	6	5	5	5	5	5	5	5	5	5	5	5	5	5	5	5	5	6	6	6	6
841	2026/4/7 16:42:48	103秒	微信	N/A	144.12.148.51(山东-聊城)	128	2	1	3	1	4	2	2	5	2	2	4	4	4	4	4	4	4	4	4	4	4	4	4	4	4	4	4	4	4	4	4	4	4	4	4	4	4	4	4	4	4	4	4
842	2026/4/7 16:42:48	439秒	微信	N/A	39.144.109.138(山东-聊城)	126	1	1	2	1	3	1	1	3	1	3	1	4	3	5	4	5	6	4	4	5	4	4	4	4	3	4	4	4	3	3	3	3	4	3	4	4	4	4	4	4	4	4	4
843	2026/4/7 16:42:51	111秒	微信	N/A	112.224.190.106(山东-济南)	157	2	1	2	1	4	1	1	3	1	2	1	4	4	5	4	4	4	4	4	4	4	5	4	4	4	5	4	4	6	6	6	5	6	6	6	6	5	6	6	6	5	5	6
844	2026/4/7 16:43:01	132秒	微信	N/A	223.104.194.172(山东-济南)	224	2	1	1	1	2	2	2	2	2	1	4	7	7	7	7	7	7	7	7	7	7	7	7	7	7	7	7	7	7	7	7	7	7	7	7	7	7	7	7	7	7	7	7
845	2026/4/7 16:43:01	352秒	微信	N/A	39.144.109.148(山东-聊城)	191	2	1	5	1	4	1	1	1	1	1	4	6	5	7	6	4	5	4	6	7	7	7	6	5	5	7	6	5	5	7	5	5	7	6	7	6	7	7	7	6	6	6	6
846	2026/4/7 16:43:04	196秒	微信	N/A	39.144.108.172(山东-东营)	178	2	1	1	1	3	1	1	1	1	1	1	5	3	6	6	5	5	5	7	7	7	5	5	4	4	4	4	7	7	7	7	3	2	3	4	7	7	7	7	7	7	7	7
847	2026/4/7 16:43:04	85秒	微信	N/A	39.144.109.129(山东-聊城)	192	2	1	1	1	2	3	3	4	2	2	4	6	6	6	6	6	6	6	6	6	6	6	6	6	6	6	6	6	6	6	6	6	6	6	6	6	6	6	6	6	6	6	6
848	2026/4/7 16:43:06	107秒	微信	N/A	39.144.109.167(山东-聊城)	224	2	1	2	1	4	1	1	1	2	1	1	7	7	7	7	7	7	7	7	7	7	7	7	7	7	7	7	7	7	7	7	7	7	7	7	7	7	7	7	7	7	7	7
849	2026/4/7 16:43:09	257秒	微信	N/A	112.224.160.102(山东-济南)	177	2	1	2	1	3	2	1	2	2	3	3	7	7	7	7	5	4	5	5	6	6	4	5	5	5	5	6	7	5	5	5	4	7	5	7	5	5	4	6	6	6	6	5
850	2026/4/7 16:43:12	209秒	微信	N/A	223.104.194.155(山东-济南)	156	1	1	1	1	1	3	1	3	2	2	1	6	4	5	6	5	4	6	3	4	4	6	6	5	4	6	5	6	3	5	4	3	5	4	4	5	5	5	6	6	4	6	6
851	2026/4/7 16:43:22	247秒	微信	N/A	223.104.194.152(山东-济南)	156	2	1	5	1	4	2	3	2	1	1	1	5	5	5	5	5	5	5	5	4	5	3	4	4	4	6	6	5	5	5	5	5	5	5	5	5	5	5	5	5	5	5	5
852	2026/4/7 16:43:38	157秒	微信	N/A	112.224.225.207(山东-济南)	224	2	1	2	1	3	2	2	3	2	1	1	7	7	7	7	7	7	7	7	7	7	7	7	7	7	7	7	7	7	7	7	7	7	7	7	7	7	7	7	7	7	7	7
853	2026/4/7 16:43:41	58秒	微信	N/A	112.224.191.234(山东-济南)	173	2	2	2	1	3	2	1	1	1	1	1	7	6	6	6	2	6	5	5	6	6	6	5	6	5	4	5	6	5	5	6	6	5	5	6	6	5	5	5	6	5	5	6
854	2026/4/7 16:44:10	118秒	微信	N/A	223.104.194.164(山东-济南)	168	2	1	3	1	3	1	1	3	2	1	1	5	5	5	5	5	5	5	5	5	5	5	5	5	5	5	5	5	5	5	5	5	5	5	5	6	6	6	6	6	6	6	6
855	2026/4/7 16:44:14	358秒	微信	N/A	223.104.194.154(山东-济南)	153	1	1	1	2	4	1	1	3	2	2	2	4	4	4	4	6	5	4	7	4	5	3	3	5	5	5	5	5	5	5	5	5	5	5	5	5	5	5	5	5	5	5	5
856	2026/4/7 16:44:20	124秒	微信	N/A	39.144.109.143(山东-聊城)	128	2	1	2	1	3	1	1	2	2	2	4	6	6	6	6	3	3	3	3	3	3	3	3	4	4	5	5	4	3	7	3	3	5	3	3	4	4	3	4	4	4	4	4
857	2026/4/7 16:44:23	292秒	微信	N/A	223.104.194.190(山东-济南)	66	2	1	2	1	4	2	1	2	2	1	1	3	2	3	2	2	2	2	2	2	2	2	2	2	2	2	2	2	2	2	2	2	2	2	2	2	2	2	2	2	2	2	2
858	2026/4/7 16:44:28	62秒	微信	N/A	39.144.108.175(山东-东营)	224	1	2	3	1	2	1	1	1	1	1	1	7	7	7	7	7	7	7	7	7	7	7	7	7	7	7	7	7	7	7	7	7	7	7	7	7	7	7	7	7	7	7	7
859	2026/4/7 16:44:30	217秒	微信	N/A	39.144.109.183(山东-聊城)	153	2	1	2	1	2	3	3	1	1	2	4	5	4	6	5	4	5	5	5	4	4	5	5	5	5	5	5	5	4	4	4	3	6	5	5	5	5	5	5	5	5	5	5
860	2026/4/7 16:44:32	90秒	微信	N/A	112.224.220.194(山东-济南)	129	2	1	2	1	4	1	1	2	2	1	1	5	3	5	4	4	4	4	4	4	4	4	4	4	4	4	4	4	4	4	4	4	4	4	4	4	4	4	4	4	4	4	4
861	2026/4/7 16:44:35	127秒	微信	N/A	39.144.109.160(山东-聊城)	186	1	1	5	1	3	1	1	3	2	2	1	5	6	3	6	4	6	6	6	6	6	6	6	6	6	6	6	6	6	6	6	6	6	6	6	6	6	6	6	6	6	6	6
862	2026/4/7 16:44:36	70秒	微信	N/A	39.144.109.132(山东-聊城)	128	2	1	3	1	3	2	1	4	2	1	1	4	4	4	4	4	4	4	4	4	4	4	4	4	4	4	4	4	4	4	4	4	4	4	4	4	4	4	4	4	4	4	4
863	2026/4/7 16:44:52	68秒	微信	N/A	223.104.194.188(山东-济南)	128	2	4	4	2	1	4	4	5	2	3	4	7	7	7	7	1	1	1	1	7	7	7	7	1	1	1	1	7	7	7	7	1	1	1	1	7	7	7	7	1	1	1	1
864	2026/4/7 16:44:53	47秒	微信	N/A	113.127.221.3(山东-济南)	224	2	2	2	1	1	3	1	2	1	1	1	7	7	7	7	7	7	7	7	7	7	7	7	7	7	7	7	7	7	7	7	7	7	7	7	7	7	7	7	7	7	7	7
865	2026/4/7 16:44:53	189秒	微信	N/A	223.104.194.184(山东-济南)	170	2	1	3	1	2	1	2	2	2	1	4	5	5	6	7	5	5	6	5	5	6	5	5	6	5	5	5	5	6	5	5	5	5	5	5	5	5	5	5	6	5	6	6
866	2026/4/7 16:44:57	65秒	微信	N/A	112.224.162.126(山东-济南)	77	1	2	3	1	4	1	1	3	1	3	1	3	3	3	3	1	1	1	1	2	2	2	2	3	2	2	2	2	2	2	2	3	3	3	3	3	3	3	3	3	3	3	3
867	2026/4/7 16:45:01	276秒	微信	N/A	223.104.194.188(山东-济南)	146	2	1	2	1	2	1	1	3	1	1	1	6	5	4	6	4	5	5	5	4	4	4	4	5	5	5	4	5	4	4	4	4	4	4	4	4	4	5	5	5	5	5	5
868	2026/4/7 16:45:06	466秒	微信	N/A	112.224.219.156(山东-济南)	92	2	1	5	1	4	1	1	2	1	1	4	2	1	1	5	2	2	2	3	3	2	4	3	2	2	2	3	5	4	3	2	2	3	2	2	3	3	3	3	4	5	5	4
869	2026/4/7 16:45:11	88秒	微信	N/A	223.104.194.189(山东-济南)	221	2	1	2	2	4	1	1	1	1	1	1	7	4	7	7	7	7	7	7	7	7	7	7	7	7	7	7	7	7	7	7	7	7	7	7	7	7	7	7	7	7	7	7
870	2026/4/7 16:45:13	127秒	微信	N/A	112.224.220.182(山东-济南)	160	2	1	3	1	2	3	3	3	2	1	4	5	5	5	5	5	5	5	5	5	5	5	5	5	5	5	5	5	5	5	5	5	5	5	5	5	5	5	5	5	5	5	5
871	2026/4/7 16:45:16	41秒	微信	N/A	112.224.228.194(山东-济南)	224	1	2	5	1	1	1	4	1	1	2	1	7	7	7	7	7	7	7	7	7	7	7	7	7	7	7	7	7	7	7	7	7	7	7	7	7	7	7	7	7	7	7	7
872	2026/4/7 16:45:28	143秒	微信	N/A	112.224.191.99(山东-济南)	185	2	1	1	1	2	2	2	2	2	1	1	6	6	6	6	4	5	6	5	6	6	3	6	6	6	6	6	6	6	6	6	6	6	6	6	6	6	6	6	6	6	6	6
873	2026/4/7 16:45:37	86秒	微信	N/A	223.104.194.161(山东-济南)	129	2	2	2	1	4	1	1	3	2	1	1	5	4	4	4	4	4	4	4	4	4	4	4	4	4	4	4	4	4	4	4	4	4	4	4	4	4	4	4	4	4	4	4
874	2026/4/7 16:45:39	120秒	微信	N/A	39.144.109.144(山东-聊城)	137	2	2	3	1	1	2	1	3	1	3	1	6	5	5	5	5	4	4	5	6	6	5	5	5	5	4	4	5	4	3	4	2	6	3	6	3	3	3	3	3	4	3	3
875	2026/4/7 16:45:39	112秒	微信	N/A	123.233.72.190(山东-济南)	186	1	1	2	1	2	1	1	5	2	1	1	6	6	6	6	6	6	6	6	6	5	6	6	4	5	6	6	7	6	5	4	4	5	6	7	6	6	7	7	6	7	6	5
876	2026/4/7 16:45:49	156秒	微信	N/A	112.224.160.199(山东-济南)	133	1	2	3	1	4	1	1	3	1	2	1	3	4	4	4	4	4	4	4	4	4	4	3	5	4	4	5	5	5	5	4	5	3	4	4	4	4	4	4	4	4	5	5
877	2026/4/7 16:45:51	1284秒	微信	N/A	223.99.163.164(山东-济南)	91	1	1	5	1	4	2	1	1	2	1	4	7	1	4	3	2	2	2	2	3	2	2	2	2	2	2	5	7	2	2	1	1	1	1	1	4	2	2	4	5	5	5	5
878	2026/4/7 16:45:59	113秒	微信	N/A	112.224.224.145(山东-济南)	224	2	2	3	1	2	3	3	3	2	1	3	7	7	7	7	7	7	7	7	7	7	7	7	7	7	7	7	7	7	7	7	7	7	7	7	7	7	7	7	7	7	7	7
879	2026/4/7 16:46:01	88秒	微信	N/A	39.144.109.165(山东-聊城)	32	2	1	2	1	4	1	1	3	2	3	4	1	1	1	1	1	1	1	1	1	1	1	1	1	1	1	1	1	1	1	1	1	1	1	1	1	1	1	1	1	1	1	1
880	2026/4/7 16:46:01	522秒	微信	N/A	39.144.109.149(山东-聊城)	150	1	1	2	2	4	1	1	2	2	2	1	7	4	6	7	3	4	5	5	5	7	4	3	5	6	6	4	4	5	4	3	4	4	5	6	4	3	3	6	6	4	5	3
881	2026/4/7 16:46:03	75秒	微信	N/A	223.104.194.159(山东-济南)	160	1	2	3	1	3	1	1	5	2	3	1	5	5	5	5	5	5	5	5	5	5	5	5	5	5	5	5	5	5	5	5	5	5	5	5	5	5	5	5	5	5	5	5
882	2026/4/7 16:46:04	54秒	微信	N/A	223.104.194.169(山东-济南)	129	2	1	2	1	2	2	2	5	2	3	4	5	4	4	4	4	4	4	4	4	4	4	4	4	4	4	4	4	4	4	4	4	4	4	4	4	4	4	4	4	4	4	4
883	2026/4/7 16:46:04	73秒	微信	N/A	112.224.228.46(山东-济南)	224	1	1	3	1	4	1	1	4	2	1	1	7	7	7	7	7	7	7	7	7	7	7	7	7	7	7	7	7	7	7	7	7	7	7	7	7	7	7	7	7	7	7	7
884	2026/4/7 16:46:10	60秒	微信	N/A	223.104.194.172(山东-济南)	215	2	1	1	1	2	1	3	1	2	3	2	6	4	4	5	7	7	7	7	7	7	7	7	7	7	7	7	7	7	7	7	7	7	7	7	7	7	7	7	7	7	7	7
885	2026/4/7 16:46:12	60秒	微信	N/A	112.224.219.199(山东-济南)	224	2	1	2	2	1	4	4	1	1	1	3	7	7	7	7	7	7	7	7	7	7	7	7	7	7	7	7	7	7	7	7	7	7	7	7	7	7	7	7	7	7	7	7
886	2026/4/7 16:46:13	92秒	微信	N/A	112.224.219.199(山东-济南)	127	2	1	2	1	2	1	1	3	2	3	1	4	1	4	6	4	4	4	4	4	4	4	4	4	4	4	4	4	4	4	4	4	4	4	4	4	4	4	4	4	4	4	4
887	2026/4/7 16:46:17	51秒	微信	N/A	39.144.109.129(山东-聊城)	224	1	2	3	1	2	1	1	2	2	1	1	7	7	7	7	7	7	7	7	7	7	7	7	7	7	7	7	7	7	7	7	7	7	7	7	7	7	7	7	7	7	7	7
888	2026/4/7 16:46:18	137秒	微信	N/A	223.104.196.118(山东-济宁)	149	1	2	3	1	3	1	1	4	2	2	1	4	3	4	6	4	4	4	4	4	4	4	4	5	5	5	5	5	5	5	5	5	5	5	5	5	5	5	5	5	5	5	5
889	2026/4/7 16:46:27	100秒	微信	N/A	112.224.158.218(山东-临沂)	70	1	1	5	2	4	1	1	3	1	1	4	4	3	4	3	2	2	2	2	2	2	2	2	2	2	2	2	2	2	2	2	2	2	2	2	2	2	2	2	2	2	2	2
890	2026/4/7 16:46:48	346秒	微信	N/A	112.230.183.72(山东-济南)	144	1	1	2	1	2	1	1	4	1	2	1	4	3	6	4	5	5	6	6	5	7	3	4	4	6	3	3	4	3	6	6	2	7	4	3	7	4	3	7	4	3	4	3
891	2026/4/7 16:46:58	167秒	微信	N/A	39.144.109.179(山东-聊城)	224	2	1	2	1	2	2	2	1	2	1	1	7	7	7	7	7	7	7	7	7	7	7	7	7	7	7	7	7	7	7	7	7	7	7	7	7	7	7	7	7	7	7	7
892	2026/4/7 16:47:05	124秒	微信	N/A	223.104.194.165(山东-济南)	127	2	1	5	2	2	3	2	3	1	1	1	5	5	4	4	4	4	4	4	4	4	4	4	4	4	4	4	4	4	4	4	3	3	3	4	4	4	4	4	4	4	4	4
893	2026/4/7 16:47:06	144秒	微信	N/A	182.39.188.62(山东-枣庄)	224	2	2	3	1	2	2	2	1	1	1	3	7	7	7	7	7	7	7	7	7	7	7	7	7	7	7	7	7	7	7	7	7	7	7	7	7	7	7	7	7	7	7	7
894	2026/4/7 16:47:10	111秒	微信	N/A	39.144.109.149(山东-聊城)	171	2	2	2	1	2	1	1	1	2	1	3	6	5	5	5	4	4	5	5	5	4	5	5	6	5	6	5	5	5	6	5	5	6	5	6	6	7	6	6	6	5	6	6
895	2026/4/7 16:47:10	134秒	微信	N/A	223.160.164.111(山东-济南)	153	2	1	2	2	2	2	3	2	1	2	4	5	4	7	7	6	6	6	6	6	6	3	6	4	4	4	5	6	3	6	3	5	5	4	4	4	4	4	4	4	4	4	4
896	2026/4/7 16:47:10	88秒	微信	N/A	223.160.161.43(山东-济南)	128	2	1	2	2	4	2	1	5	2	2	1	4	4	4	4	4	4	4	4	4	4	4	4	4	4	4	4	4	4	4	4	4	4	4	4	4	4	4	4	4	4	4	4
897	2026/4/7 16:47:16	116秒	微信	N/A	39.144.109.164(山东-聊城)	128	1	1	3	1	4	2	2	3	2	3	1	4	4	4	4	4	4	4	4	4	4	4	4	4	4	4	4	4	4	4	4	4	4	4	4	4	4	4	4	4	4	4	4
898	2026/4/7 16:47:22	157秒	微信	N/A	223.104.194.132(山东-济南)	224	1	1	3	2	3	1	1	3	2	1	4	7	7	7	7	7	7	7	7	7	7	7	7	7	7	7	7	7	7	7	7	7	7	7	7	7	7	7	7	7	7	7	7
899	2026/4/7 16:47:31	103秒	微信	N/A	223.104.194.130(山东-济南)	128	2	1	2	2	4	1	1	1	2	1	1	4	4	4	4	4	4	4	4	4	4	4	4	4	4	4	4	4	4	4	4	4	4	4	4	4	4	4	4	4	4	4	4
900	2026/4/7 16:47:55	126秒	微信	N/A	223.104.194.147(山东-济南)	163	2	1	3	1	4	1	1	1	1	1	1	5	5	6	5	5	5	5	5	5	5	5	5	5	5	5	5	7	5	5	5	5	5	5	5	5	5	5	5	5	5	5	5
901	2026/4/7 16:48:15	484秒	微信	N/A	39.144.109.135(山东-聊城)	135	2	1	5	1	4	2	2	4	2	2	4	4	2	6	5	5	4	5	5	3	4	5	5	4	4	5	4	5	3	4	1	3	4	3	4	5	4	4	6	4	5	6	4
902	2026/4/7 16:48:16	386秒	微信	N/A	112.224.191.80(山东-济南)	224	2	1	5	1	2	2	2	2	1	1	4	7	7	7	7	7	7	7	7	7	7	7	7	7	7	7	7	7	7	7	7	7	7	7	7	7	7	7	7	7	7	7	7
903	2026/4/7 16:48:19	174秒	微信	N/A	223.104.194.133(山东-济南)	158	2	1	3	1	2	1	1	2	1	1	1	6	5	4	4	4	4	4	4	5	5	4	5	5	5	5	6	6	5	5	5	4	5	4	5	5	6	6	6	5	5	6	5
904	2026/4/7 16:48:30	63秒	微信	N/A	39.144.109.177(山东-聊城)	188	2	1	3	1	4	1	1	1	1	1	1	7	7	7	7	7	7	7	7	7	7	7	7	6	6	6	6	5	5	5	5	5	5	5	5	5	5	5	5	5	5	5	5
905	2026/4/7 16:48:35	98秒	微信	N/A	223.104.194.175(山东-济南)	224	2	1	2	2	4	1	1	1	2	1	4	7	7	7	7	7	7	7	7	7	7	7	7	7	7	7	7	7	7	7	7	7	7	7	7	7	7	7	7	7	7	7	7
906	2026/4/7 16:48:37	112秒	微信	N/A	112.224.224.51(山东-济南)	162	2	1	3	1	3	1	2	3	2	2	4	6	5	5	5	6	6	3	6	5	5	5	5	5	5	5	5	5	5	5	5	5	5	5	5	5	5	5	5	5	5	5	5
907	2026/4/7 16:48:39	141秒	微信	N/A	39.144.109.188(山东-聊城)	120	2	1	5	1	4	1	1	1	2	1	1	5	5	3	4	4	4	3	3	3	3	3	3	3	3	3	4	4	4	4	4	4	4	4	4	4	4	4	4	4	4	4	4
908	2026/4/7 16:48:47	304秒	微信	N/A	39.144.109.150(山东-聊城)	215	2	1	3	1	3	1	1	1	1	1	4	7	7	7	7	7	7	7	7	7	7	7	7	7	7	7	7	7	7	7	5	4	7	7	7	7	5	7	7	7	7	7	5
909	2026/4/7 16:49:06	65秒	微信	N/A	223.104.196.200(山东-菏泽)	127	1	1	2	2	4	1	1	3	1	1	4	4	4	4	4	4	4	4	4	4	4	4	4	4	4	4	4	4	4	4	4	4	4	4	4	4	4	4	4	4	4	3	4
910	2026/4/7 16:49:14	148秒	微信	N/A	27.202.201.216(山东-东营)	211	2	4	2	1	2	2	1	1	2	1	2	7	7	7	7	6	6	6	6	6	6	7	6	6	6	6	6	6	6	7	7	7	7	7	7	7	7	7	7	7	7	7	7
911	2026/4/7 16:49:24	206秒	微信	N/A	223.99.163.165(山东-济南)	215	2	2	3	1	3	1	1	1	1	1	1	7	7	7	7	7	7	7	7	7	7	7	7	7	7	7	7	7	5	7	6	5	5	5	7	7	7	7	7	7	7	7	7
912	2026/4/7 16:49:30	240秒	微信	N/A	39.144.109.176(山东-聊城)	126	2	1	5	2	4	1	1	1	2	1	2	6	4	4	5	4	3	4	4	3	4	4	4	4	3	3	4	4	3	4	3	4	4	4	5	4	4	4	4	4	4	4	4
913	2026/4/7 16:49:32	446秒	微信	N/A	111.55.120.41(山东-济南)	99	1	1	3	1	2	1	1	4	2	3	4	1	1	1	1	1	1	1	1	3	3	3	3	4	4	4	4	4	4	4	4	4	4	4	4	4	4	3	4	4	4	4	4
914	2026/4/7 16:50:00	142秒	微信	N/A	144.12.157.108(山东-聊城)	221	2	2	2	1	1	3	2	2	2	1	4	7	4	7	7	7	7	7	7	7	7	7	7	7	7	7	7	7	7	7	7	7	7	7	7	7	7	7	7	7	7	7	7
915	2026/4/7 16:50:04	365秒	微信	N/A	223.160.160.75(山东-济南)	107	1	1	2	1	2	3	3	4	2	2	1	3	3	3	3	3	3	3	3	3	3	3	3	3	3	3	3	5	4	3	4	3	4	3	3	4	5	4	4	4	3	3	3
916	2026/4/7 16:50:04	95秒	微信	N/A	112.224.220.165(山东-济南)	188	1	1	5	1	2	1	1	5	2	2	4	5	5	5	6	6	5	6	6	6	6	6	6	6	5	6	6	7	6	6	6	6	6	6	6	6	6	6	6	6	6	6	6
917	2026/4/7 16:50:08	173秒	微信	N/A	39.144.109.154(山东-聊城)	97	2	1	2	2	2	2	3	1	1	1	1	5	3	3	3	3	2	2	2	3	2	2	3	3	3	3	3	4	3	3	3	3	5	3	4	3	3	3	3	3	3	3	3
918	2026/4/7 16:50:08	119秒	微信	N/A	123.233.72.56(山东-济南)	157	2	1	5	1	4	3	2	2	2	2	1	5	4	5	4	5	6	6	5	4	5	5	6	6	5	4	3	6	3	6	4	6	5	5	4	5	5	4	5	5	5	6	5
919	2026/4/7 16:50:13	215秒	微信	N/A	112.224.226.242(山东-济南)	188	2	2	5	1	4	1	1	3	2	3	1	7	1	6	6	6	6	6	6	6	6	6	6	6	6	6	6	6	6	6	6	6	6	6	6	6	6	6	6	6	6	6	6
920	2026/4/7 16:50:18	358秒	微信	N/A	39.144.109.135(山东-聊城)	128	2	1	5	1	3	1	2	2	1	1	4	4	4	4	4	4	4	4	4	4	4	4	4	4	4	4	4	4	4	4	4	4	4	4	4	4	4	4	4	4	4	4	4
921	2026/4/7 16:50:24	173秒	微信	N/A	39.144.109.156(山东-聊城)	134	2	1	3	1	4	1	1	1	1	1	1	4	4	3	4	3	4	5	4	5	5	5	4	4	4	4	5	5	4	4	4	4	5	4	4	4	5	5	5	4	3	4	3
922	2026/4/7 16:50:46	68秒	微信	N/A	223.99.163.166(山东-济南)	140	1	1	5	2	2	3	3	3	2	2	2	4	4	4	4	4	4	4	4	4	4	4	4	4	5	4	5	5	5	5	5	5	4	5	4	4	5	4	4	4	5	5	5
923	2026/4/7 16:50:48	148秒	微信	N/A	223.104.194.149(山东-济南)	128	2	1	2	1	2	2	3	4	2	1	4	4	3	5	4	4	4	4	4	4	4	4	4	4	4	4	4	4	4	4	4	4	4	4	4	4	4	4	4	4	4	4	4
924	2026/4/7 16:50:50	151秒	微信	N/A	223.104.194.163(山东-济南)	128	1	1	2	1	3	1	1	3	1	2	1	4	4	4	4	4	4	4	4	4	4	4	4	4	4	4	4	4	4	4	4	4	4	4	4	4	4	4	4	4	4	4	4
925	2026/4/7 16:51:02	180秒	微信	N/A	223.104.194.171(山东-济南)	107	2	1	2	2	4	1	1	1	2	1	1	3	4	3	2	3	3	4	4	3	4	3	4	3	3	3	3	4	3	3	3	2	4	3	5	4	3	2	3	4	4	4	4
926	2026/4/7 16:51:12	94秒	微信	N/A	223.104.194.145(山东-济南)	32	2	2	2	1	4	1	1	1	1	2	3	1	1	1	1	1	1	1	1	1	1	1	1	1	1	1	1	1	1	1	1	1	1	1	1	1	1	1	1	1	1	1	1
927	2026/4/7 16:51:13	63秒	微信	N/A	223.160.160.42(山东-济南)	224	1	1	1	1	4	2	2	1	1	1	1	7	7	7	7	7	7	7	7	7	7	7	7	7	7	7	7	7	7	7	7	7	7	7	7	7	7	7	7	7	7	7	7
928	2026/4/7 16:51:21	479秒	微信	N/A	112.224.219.182(山东-济南)	107	1	1	2	1	2	3	1	3	2	1	1	3	3	5	4	3	3	3	3	3	3	3	4	5	4	3	4	4	3	4	2	2	3	3	3	3	3	3	4	4	4	3	3
929	2026/4/7 16:51:31	65秒	微信	N/A	39.144.109.155(山东-聊城)	110	2	1	5	1	4	1	1	2	2	2	1	3	3	3	3	4	4	3	3	3	3	3	3	2	2	3	3	3	2	3	3	3	3	3	3	6	6	5	5	4	4	4	5
930	2026/4/7 16:51:32	99秒	微信	N/A	39.144.109.26(山东-聊城)	128	2	2	5	1	2	3	2	1	1	2	1	4	4	4	4	4	4	4	4	4	4	4	4	4	4	4	4	4	4	4	4	4	4	4	4	4	4	4	4	4	4	4	4
931	2026/4/7 16:51:34	83秒	微信	N/A	39.144.109.134(山东-聊城)	189	2	1	3	1	4	2	1	3	1	3	4	4	6	6	5	6	6	6	6	6	6	6	6	6	6	6	6	6	6	6	6	6	6	6	6	6	6	6	6	6	6	6	6
932	2026/4/7 16:51:45	168秒	微信	N/A	223.104.194.149(山东-济南)	151	2	1	2	1	4	1	1	4	1	1	1	6	4	4	3	5	3	5	5	5	5	3	5	6	5	5	6	5	4	5	2	3	6	6	5	5	5	5	5	5	5	5	5
933	2026/4/7 16:52:00	160秒	微信	N/A	182.33.130.212(山东-潍坊)	165	2	1	2	2	4	1	1	1	2	1	4	3	2	3	7	3	4	4	5	3	4	4	7	7	7	7	7	7	7	7	7	2	5	4	4	7	7	7	7	5	4	5	3
934	2026/4/7 16:52:03	74秒	微信	N/A	223.104.194.138(山东-济南)	224	2	2	3	1	4	2	1	3	1	1	3	7	7	7	7	7	7	7	7	7	7	7	7	7	7	7	7	7	7	7	7	7	7	7	7	7	7	7	7	7	7	7	7
935	2026/4/7 16:52:09	126秒	微信	N/A	39.144.109.142(山东-聊城)	212	2	1	5	1	1	1	1	2	2	2	1	7	7	7	7	7	7	7	7	7	7	7	7	7	7	7	7	7	7	7	7	6	6	6	6	6	6	6	6	6	6	6	6
936	2026/4/7 16:52:16	134秒	微信	N/A	39.144.109.142(山东-聊城)	128	2	1	1	1	4	1	1	1	2	2	1	4	4	4	4	4	4	4	4	4	4	4	4	4	4	4	4	4	4	4	4	4	4	4	4	4	4	4	4	4	4	4	4
937	2026/4/7 16:52:18	110秒	微信	N/A	223.104.194.150(山东-济南)	205	1	1	5	1	3	2	1	2	2	2	1	5	5	5	5	6	6	5	6	7	6	7	7	7	6	7	7	7	6	6	6	7	7	7	6	7	7	7	7	7	7	7	7
938	2026/4/7 16:52:23	71秒	微信	N/A	112.224.219.21(山东-济南)	200	2	2	2	1	4	1	1	3	2	1	1	1	1	1	1	7	7	7	7	7	7	7	7	7	7	7	7	7	7	7	7	7	7	7	7	7	7	7	7	7	7	7	7
939	2026/4/7 16:52:34	83秒	微信	N/A	112.224.220.151(山东-济南)	192	2	1	5	1	4	2	2	5	2	2	1	6	6	6	6	6	6	6	6	6	6	6	6	6	6	6	6	6	6	6	6	6	6	6	6	6	6	6	6	6	6	6	6
940	2026/4/7 16:52:52	143秒	微信	N/A	223.160.160.236(山东-济南)	124	1	1	5	1	4	1	1	3	2	1	4	3	3	3	3	4	4	4	4	4	4	4	4	4	4	4	4	4	4	4	4	4	4	4	4	4	4	4	4	4	4	4	4
941	2026/4/7 16:52:55	201秒	微信	N/A	223.104.194.165(山东-济南)	224	1	1	1	1	2	1	3	1	1	1	1	7	7	7	7	7	7	7	7	7	7	7	7	7	7	7	7	7	7	7	7	7	7	7	7	7	7	7	7	7	7	7	7
942	2026/4/7 16:52:57	463秒	微信	N/A	112.224.191.180(山东-济南)	144	1	1	2	1	2	2	2	4	2	1	1	4	4	5	7	4	2	4	4	4	5	5	5	5	6	6	4	5	4	4	5	4	4	4	5	4	4	4	4	5	5	5	4
943	2026/4/7 16:52:59	195秒	微信	N/A	223.99.163.165(山东-济南)	154	2	1	5	1	4	2	1	1	2	1	1	5	4	4	4	4	4	4	4	4	4	6	6	6	4	5	7	7	4	5	6	4	4	4	4	6	7	7	4	5	3	5	4
944	2026/4/7 16:53:12	87秒	微信	N/A	112.53.79.13(山东-济南)	224	2	1	3	2	3	1	1	3	2	1	4	7	7	7	7	7	7	7	7	7	7	7	7	7	7	7	7	7	7	7	7	7	7	7	7	7	7	7	7	7	7	7	7
945	2026/4/7 16:53:16	61秒	微信	N/A	112.224.190.244(山东-济南)	192	1	1	1	1	2	1	1	3	2	2	2	6	6	6	6	6	6	6	6	6	6	6	6	6	6	6	6	6	6	6	6	6	6	6	6	6	6	6	6	6	6	6	6
946	2026/4/7 16:53:24	314秒	微信	N/A	112.53.64.181(山东-济南)	170	2	2	3	1	2	2	2	1	1	2	1	6	6	6	6	4	4	4	4	5	6	5	5	6	6	5	6	7	6	6	6	4	6	6	6	6	4	4	4	6	4	5	6
947	2026/4/7 16:53:38	83秒	微信	N/A	39.144.109.163(山东-聊城)	96	2	1	5	1	3	1	1	5	2	2	1	3	3	3	3	3	3	3	3	3	3	3	3	3	3	3	3	3	3	3	3	3	3	3	3	3	3	3	3	3	3	3	3
948	2026/4/7 16:53:49	180秒	微信	N/A	112.224.220.81(山东-济南)	158	2	1	2	1	3	1	3	3	2	1	1	5	5	5	5	5	5	5	5	5	5	5	5	5	4	5	5	5	5	5	5	5	5	5	5	5	4	5	4	5	5	6	5
949	2026/4/7 16:53:53	89秒	微信	N/A	39.144.109.133(山东-聊城)	128	2	2	5	1	2	3	2	3	2	2	1	4	4	4	4	4	4	4	4	4	4	4	4	4	4	4	4	4	4	4	4	4	4	4	4	4	4	4	4	4	4	4	4
950	2026/4/7 16:53:57	72秒	微信	N/A	39.144.109.31(山东-聊城)	224	2	2	3	1	4	1	1	2	2	2	1	7	7	7	7	7	7	7	7	7	7	7	7	7	7	7	7	7	7	7	7	7	7	7	7	7	7	7	7	7	7	7	7
951	2026/4/7 16:54:32	79秒	微信	N/A	112.53.79.14(山东-济南)	128	1	1	3	2	4	1	1	3	2	2	4	4	4	4	4	4	4	4	4	4	4	4	4	4	4	4	4	4	4	4	4	4	4	4	4	4	4	4	4	4	4	4	4
952	2026/4/7 16:54:42	147秒	微信	N/A	39.144.109.144(山东-聊城)	205	2	1	2	2	4	2	2	3	2	1	4	7	4	7	7	7	7	7	7	7	6	7	7	6	6	6	6	7	7	7	7	1	7	2	7	7	7	7	7	7	7	7	7
953	2026/4/7 16:55:09	150秒	微信	N/A	39.144.109.150(山东-聊城)	128	2	1	5	2	2	2	1	1	1	1	4	3	4	4	3	4	4	4	4	4	4	4	4	4	4	4	4	4	4	4	4	4	5	3	4	4	5	5	5	4	4	4	3
954	2026/4/7 16:55:12	39秒	微信	N/A	39.144.109.164(山东-聊城)	224	1	1	1	1	1	1	1	1	1	1	1	7	7	7	7	7	7	7	7	7	7	7	7	7	7	7	7	7	7	7	7	7	7	7	7	7	7	7	7	7	7	7	7
955	2026/4/7 16:55:52	83秒	微信	N/A	39.144.109.150(山东-聊城)	123	1	3	1	1	4	1	1	4	2	2	1	3	4	3	3	4	4	4	4	4	3	4	4	4	4	5	4	4	5	5	3	3	3	5	4	3	5	3	5	3	4	4	3
956	2026/4/7 16:55:55	68秒	微信	N/A	182.33.182.143(山东-潍坊)	143	1	3	2	1	2	3	2	5	1	1	1	7	5	5	5	4	5	5	5	4	4	4	4	4	4	4	4	5	4	5	4	4	5	6	4	3	3	5	5	4	5	3	5
957	2026/4/7 16:55:58	70秒	微信	N/A	223.104.194.157(山东-济南)	128	2	1	1	1	3	2	2	3	1	2	1	4	4	4	4	4	4	4	4	4	4	4	4	4	4	4	4	4	4	4	4	4	4	4	4	4	4	4	4	4	4	4	4
958	2026/4/7 16:56:02	66秒	微信	N/A	223.104.194.135(山东-济南)	57	2	1	1	1	2	2	2	1	1	3	4	3	2	4	2	1	2	2	1	2	2	1	2	2	1	2	2	2	1	2	1	1	1	1	1	2	2	2	2	2	2	2	2
959	2026/4/7 16:56:39	678秒	微信	N/A	223.104.194.157(山东-济南)	85	2	2	3	1	4	1	2	3	2	2	1	6	2	5	2	3	1	3	2	4	2	2	2	1	4	4	3	3	3	2	2	1	4	2	2	3	2	2	3	3	2	3	2
960	2026/4/7 16:56:40	153秒	微信	N/A	112.224.143.189(山东-济南)	187	1	1	1	1	4	1	1	3	1	2	4	4	4	4	7	6	6	6	6	6	6	6	6	6	6	6	6	6	6	6	6	6	6	6	6	6	6	6	6	6	6	6	6
961	2026/4/7 16:56:41	96秒	微信	N/A	39.144.109.149(山东-聊城)	212	2	2	3	1	2	3	3	1	1	1	3	7	7	7	7	7	7	7	7	7	7	7	7	7	7	7	7	7	7	7	7	7	7	7	7	4	4	4	4	7	7	7	7
962	2026/4/7 16:56:43	42秒	微信	N/A	112.53.79.14(山东-济南)	96	1	1	1	1	1	1	1	1	1	1	1	3	3	3	3	3	3	3	3	3	3	3	3	3	3	3	3	3	3	3	3	3	3	3	3	3	3	3	3	3	3	3	3
963	2026/4/7 16:56:44	187秒	微信	N/A	223.104.194.145(山东-济南)	135	2	1	1	1	4	1	1	3	2	3	1	5	2	5	5	5	5	5	5	3	5	5	5	3	5	4	4	4	4	4	4	4	4	4	4	4	4	4	4	4	4	4	4
964	2026/4/7 16:56:51	67秒	微信	N/A	39.144.109.178(山东-聊城)	192	2	1	3	1	1	3	3	1	1	1	2	6	6	6	6	6	6	6	6	6	6	6	6	6	6	6	6	6	6	6	6	6	6	6	6	6	6	6	6	6	6	6	6
965	2026/4/7 16:56:53	69秒	微信	N/A	39.144.109.129(山东-聊城)	171	2	1	3	1	2	3	2	1	1	1	1	4	4	4	5	6	5	6	5	6	5	6	5	6	5	6	5	6	5	6	5	6	5	6	5	6	5	6	5	6	5	6	5
966	2026/4/7 16:56:55	58秒	微信	N/A	112.232.212.199(山东-济南)	128	1	1	1	1	4	2	2	3	2	3	4	4	4	4	4	4	4	4	4	4	4	4	4	4	4	4	4	4	4	4	4	4	4	4	4	4	4	4	4	4	4	4	4
967	2026/4/7 16:57:01	75秒	微信	N/A	39.144.109.131(山东-聊城)	224	1	1	1	1	4	1	1	3	2	1	1	7	7	7	7	7	7	7	7	7	7	7	7	7	7	7	7	7	7	7	7	7	7	7	7	7	7	7	7	7	7	7	7
968	2026/4/7 16:57:03	76秒	微信	N/A	112.224.160.91(山东-济南)	153	1	1	1	1	2	1	3	3	2	2	1	5	5	5	5	5	5	5	5	5	5	5	5	5	5	5	5	5	5	5	5	5	4	5	5	5	4	5	4	4	4	4	4
969	2026/4/7 16:57:13	64秒	微信	N/A	112.224.221.63(山东-济南)	129	2	1	1	1	4	1	1	2	1	1	1	7	7	7	4	2	2	2	2	4	4	4	4	4	4	4	4	4	4	4	4	4	4	4	4	4	4	4	4	4	4	4	4
970	2026/4/7 16:57:15	91秒	微信	N/A	223.104.194.132(山东-济南)	224	2	1	3	1	1	3	3	1	1	1	1	7	7	7	7	7	7	7	7	7	7	7	7	7	7	7	7	7	7	7	7	7	7	7	7	7	7	7	7	7	7	7	7
971	2026/4/7 16:57:17	69秒	微信	N/A	112.224.227.97(山东-济南)	182	2	1	3	1	4	2	2	1	1	1	1	7	5	4	5	6	5	7	5	5	3	5	6	6	5	6	6	5	6	6	7	6	7	6	6	6	6	5	6	6	6	6	6
972	2026/4/7 16:57:20	50秒	微信	N/A	112.224.161.79(山东-济南)	104	1	3	2	1	2	1	1	1	1	2	2	1	1	1	1	1	1	1	1	1	1	1	1	1	1	1	1	1	1	1	1	7	7	7	7	7	7	7	7	7	7	7	7
973	2026/4/7 16:57:30	101秒	微信	N/A	112.53.79.12(山东-济南)	224	1	1	1	1	2	1	1	4	2	1	1	7	7	7	7	7	7	7	7	7	7	7	7	7	7	7	7	7	7	7	7	7	7	7	7	7	7	7	7	7	7	7	7
974	2026/4/7 16:57:30	78秒	微信	N/A	39.144.109.152(山东-聊城)	163	2	1	1	1	4	2	1	1	2	2	4	6	6	6	6	6	6	6	4	6	5	4	6	4	5	5	4	6	4	6	5	6	4	5	5	4	3	5	5	5	6	5	4
975	2026/4/7 16:57:30	88秒	微信	N/A	223.104.194.167(山东-济南)	224	2	1	1	1	3	1	1	4	1	1	3	7	7	7	7	7	7	7	7	7	7	7	7	7	7	7	7	7	7	7	7	7	7	7	7	7	7	7	7	7	7	7	7
976	2026/4/7 16:57:37	114秒	微信	N/A	112.224.163.213(山东-济南)	146	2	1	3	1	3	1	1	3	2	2	4	2	4	4	4	4	4	4	4	5	5	5	5	5	5	5	5	5	5	5	5	2	2	2	2	6	6	6	6	6	6	6	6
977	2026/4/7 16:57:39	92秒	微信	N/A	223.99.163.164(山东-济南)	224	1	1	1	1	4	1	1	3	2	1	1	7	7	7	7	7	7	7	7	7	7	7	7	7	7	7	7	7	7	7	7	7	7	7	7	7	7	7	7	7	7	7	7
978	2026/4/7 16:57:39	75秒	微信	N/A	39.144.109.167(山东-聊城)	160	2	3	2	1	3	2	1	2	1	2	1	5	5	5	5	5	5	5	5	5	5	5	5	5	5	5	5	5	5	5	5	5	5	5	5	5	5	5	5	5	5	5	5
979	2026/4/7 16:57:44	48秒	微信	N/A	112.224.221.216(山东-济南)	176	1	1	1	1	4	2	2	2	1	2	1	1	1	1	1	1	1	1	1	7	7	7	7	7	7	7	7	7	7	7	7	7	7	7	7	7	7	7	7	7	7	7	7
980	2026/4/7 16:57:45	115秒	微信	N/A	39.144.109.161(山东-聊城)	128	1	1	3	1	3	2	2	3	1	1	1	4	4	4	4	4	4	4	4	4	4	4	4	4	4	4	4	4	4	4	4	4	4	4	4	4	4	4	4	4	4	4	4
981	2026/4/7 16:57:53	61秒	微信	N/A	39.144.109.148(山东-聊城)	127	1	1	1	1	4	2	2	3	2	3	4	3	3	4	3	3	4	5	4	4	4	3	5	3	5	4	4	4	5	4	5	4	4	4	3	5	5	4	4	3	4	4	4
982	2026/4/7 16:57:53	131秒	微信	N/A	112.224.228.187(山东-济南)	168	2	1	3	1	3	1	2	3	2	2	1	2	3	7	7	7	7	7	7	4	6	4	6	4	5	6	7	5	4	4	4	3	5	4	6	7	7	6	6	4	5	5	4
983	2026/4/7 16:57:53	84秒	微信	N/A	39.144.109.158(山东-聊城)	160	2	3	2	1	4	3	1	2	2	2	1	5	5	5	5	5	5	5	5	5	5	5	5	5	5	5	5	5	5	5	5	5	5	5	5	5	5	5	5	5	5	5	5
984	2026/4/7 16:58:03	109秒	微信	N/A	112.224.141.214(山东-济南)	200	1	1	1	1	2	1	1	2	2	1	1	7	7	7	7	7	7	7	7	7	7	7	7	7	7	7	7	7	7	7	7	7	7	7	7	4	4	4	4	4	4	4	4
985	2026/4/7 16:58:10	80秒	微信	N/A	223.160.161.132(山东-济南)	160	1	1	3	1	4	1	1	2	1	2	1	5	5	5	5	5	5	5	5	5	5	5	5	5	5	5	5	5	5	5	5	5	5	5	5	5	5	5	5	5	5	5	5
986	2026/4/7 16:58:13	114秒	微信	N/A	113.126.57.45(山东-济南)	135	2	1	3	1	2	3	1	1	1	1	4	4	3	4	4	5	5	5	4	4	4	4	4	4	4	4	4	6	3	4	5	3	4	4	4	5	5	4	5	5	4	4	4
987	2026/4/7 16:58:15	121秒	微信	N/A	39.144.109.188(山东-聊城)	136	2	1	1	1	2	1	1	1	1	2	4	6	6	6	6	4	4	4	4	4	4	4	4	4	4	4	4	4	4	4	4	4	4	4	4	4	4	4	4	4	4	4	4
988	2026/4/7 16:58:18	117秒	微信	N/A	39.144.109.155(山东-聊城)	163	2	1	3	1	2	2	2	5	2	1	1	5	5	5	5	5	5	5	5	5	5	5	5	5	5	6	5	6	5	5	5	5	5	5	6	5	5	5	5	5	5	5	5
989	2026/4/7 16:58:18	120秒	微信	N/A	112.230.183.249(山东-济南)	87	1	1	1	1	2	1	1	4	2	1	4	3	2	3	4	3	2	3	3	3	3	3	3	4	3	2	2	4	3	2	2	2	2	2	2	3	2	2	3	3	2	4	3
990	2026/4/7 16:58:19	144秒	微信	N/A	39.144.109.130(山东-聊城)	119	2	1	3	1	2	3	3	2	2	2	1	4	2	3	3	4	4	4	5	4	4	3	4	3	3	4	4	4	2	3	3	3	4	4	5	4	4	4	4	4	4	4	5
991	2026/4/7 16:58:33	67秒	微信	N/A	39.144.109.156(山东-聊城)	97	1	3	2	1	3	1	1	5	2	3	1	3	3	3	3	3	3	3	3	3	3	3	3	4	3	3	3	3	3	3	3	3	3	3	3	3	3	3	3	3	3	3	3
992	2026/4/7 16:58:33	156秒	微信	N/A	223.99.163.164(山东-济南)	149	2	1	3	1	3	2	2	3	2	1	1	5	5	4	5	4	4	5	4	4	4	4	6	5	5	5	4	6	5	4	4	4	5	4	4	4	5	4	6	5	6	6	4
993	2026/4/7 16:58:36	91秒	微信	N/A	223.160.160.215(山东-济南)	224	1	1	1	1	2	2	2	2	2	2	1	7	7	7	7	7	7	7	7	7	7	7	7	7	7	7	7	7	7	7	7	7	7	7	7	7	7	7	7	7	7	7	7
994	2026/4/7 16:58:38	67秒	微信	N/A	39.144.109.151(山东-聊城)	224	1	1	1	1	4	1	1	3	2	1	4	7	7	7	7	7	7	7	7	7	7	7	7	7	7	7	7	7	7	7	7	7	7	7	7	7	7	7	7	7	7	7	7
995	2026/4/7 16:58:39	98秒	微信	N/A	223.99.163.164(山东-济南)	143	1	1	3	1	2	4	4	5	2	1	1	5	5	5	5	6	6	6	6	5	4	4	4	4	4	4	4	4	4	4	4	4	3	3	2	5	3	5	5	5	5	5	5
996	2026/4/7 16:58:40	65秒	微信	N/A	223.104.194.143(山东-济南)	160	2	1	1	1	2	3	3	2	2	1	4	5	5	5	5	5	5	5	5	5	5	5	5	5	5	5	5	5	5	5	5	5	5	5	5	5	5	5	5	5	5	5	5
997	2026/4/7 16:58:42	145秒	微信	N/A	39.144.109.181(山东-聊城)	102	1	1	1	1	4	1	1	2	2	1	4	1	1	1	1	1	1	1	1	3	3	4	4	3	3	3	3	4	4	4	4	4	4	4	3	5	5	5	5	4	4	5	4
998	2026/4/7 16:58:42	147秒	微信	N/A	112.53.79.14(山东-济南)	132	2	1	1	1	2	2	1	3	2	1	1	5	5	5	5	4	4	4	4	4	4	4	4	4	4	4	4	4	4	4	4	4	4	4	4	4	4	4	4	4	4	4	4
999	2026/4/7 16:58:45	811秒	微信	N/A	223.104.194.128(山东-济南)	121	1	1	5	2	4	1	1	2	2	1	1	5	1	1	1	1	1	4	1	1	1	1	1	5	5	5	2	7	5	7	5	2	7	7	7	5	3	2	4	6	6	6	6
1000	2026/4/7 16:58:46	157秒	微信	N/A	112.224.224.198(山东-济南)	137	1	1	1	1	2	2	3	2	1	2	4	3	2	3	4	4	3	3	3	2	4	4	5	6	4	5	5	7	5	5	4	4	4	4	4	6	6	4	7	6	3	4	4
1001	2026/4/7 16:58:53	142秒	微信	N/A	39.144.109.179(山东-聊城)	138	1	1	3	1	4	1	1	5	2	3	4	4	4	4	5	3	3	5	3	3	3	3	4	5	5	5	5	5	5	4	4	4	4	4	4	5	5	5	5	5	5	5	5
1002	2026/4/7 16:59:08	206秒	微信	N/A	223.104.194.153(山东-济南)	145	1	1	3	1	1	3	3	1	1	2	4	3	1	4	1	4	4	4	4	5	5	5	5	4	4	5	5	5	5	2	3	2	4	5	4	6	6	6	6	7	7	7	7
1003	2026/4/7 16:59:09	195秒	微信	N/A	112.53.79.12(山东-济南)	173	1	1	3	1	4	1	1	3	2	1	1	5	5	4	6	5	5	5	5	5	5	5	5	6	6	6	6	6	6	6	6	4	6	6	6	6	6	6	6	6	5	4	4
1004	2026/4/7 16:59:11	145秒	微信	N/A	112.53.79.11(山东-济南)	210	2	3	5	1	4	1	1	2	2	1	1	7	7	4	7	3	3	7	4	7	7	7	7	7	7	7	7	7	7	7	7	7	7	7	7	7	7	7	7	7	7	7	7
1005	2026/4/7 16:59:18	75秒	微信	N/A	223.104.194.71(山东-济南)	128	2	1	2	1	2	3	3	1	2	1	1	4	4	4	4	4	4	4	4	4	4	4	4	4	4	4	4	4	4	4	4	4	4	4	4	4	4	4	4	4	4	4	4
1006	2026/4/7 16:59:21	71秒	微信	N/A	112.224.226.14(山东-济南)	224	2	1	5	1	2	2	2	1	1	1	1	7	7	7	7	7	7	7	7	7	7	7	7	7	7	7	7	7	7	7	7	7	7	7	7	7	7	7	7	7	7	7	7
1007	2026/4/7 16:59:24	45秒	微信	N/A	182.33.133.83(山东-潍坊)	224	1	3	1	1	3	3	3	5	1	1	1	7	7	7	7	7	7	7	7	7	7	7	7	7	7	7	7	7	7	7	7	7	7	7	7	7	7	7	7	7	7	7	7
1008	2026/4/7 16:59:26	56秒	微信	N/A	39.144.109.132(山东-聊城)	128	2	1	1	1	2	2	2	1	1	3	4	4	4	4	4	4	4	4	4	4	4	4	4	4	4	4	4	4	4	4	4	4	4	4	4	4	4	4	4	4	4	4	4
1009	2026/4/7 16:59:30	165秒	微信	N/A	223.104.194.142(山东-济南)	116	2	3	2	1	4	1	1	1	2	2	4	5	3	4	5	3	3	3	3	3	3	3	3	4	3	4	4	5	4	4	4	3	4	4	4	4	4	4	4	3	3	3	3
1010	2026/4/7 16:59:32	59秒	微信	N/A	112.224.160.117(山东-济南)	171	1	1	3	1	4	2	2	4	2	3	1	6	6	6	6	5	6	5	6	5	6	6	5	5	5	5	6	5	5	5	6	6	5	5	5	5	5	5	5	5	5	5	5
1011	2026/4/7 16:59:34	183秒	微信	N/A	112.224.225.218(山东-济南)	128	1	1	1	2	2	2	2	2	2	1	1	4	4	4	4	4	4	4	4	4	4	4	4	4	4	4	4	4	4	4	4	4	4	4	4	4	4	4	4	4	4	4	4
1012	2026/4/7 16:59:35	89秒	微信	N/A	112.224.163.32(山东-济南)	192	2	1	5	1	3	2	1	1	2	2	1	6	6	6	6	6	6	6	6	6	6	6	6	6	6	6	6	6	6	6	6	6	6	6	6	6	6	6	6	6	6	6	6
1013	2026/4/7 16:59:36	118秒	微信	N/A	112.53.79.11(山东-济南)	206	1	1	3	1	4	2	2	5	2	2	4	7	7	7	7	7	7	7	7	7	7	7	7	7	7	7	7	7	7	7	7	7	1	1	1	7	7	7	7	7	7	7	7
1014	2026/4/7 16:59:44	172秒	微信	N/A	113.126.93.128(山东-菏泽)	201	2	1	3	2	4	1	1	1	1	1	1	7	7	7	7	6	5	7	5	5	6	6	6	7	7	7	7	7	4	5	5	5	5	5	7	7	7	7	7	7	7	7	7
1015	2026/4/7 16:59:49	70秒	微信	N/A	112.224.190.255(山东-济南)	136	2	1	5	1	3	1	1	1	1	1	1	4	4	4	4	4	4	4	5	4	5	5	5	5	5	5	5	4	4	4	4	4	4	4	4	4	4	4	4	4	4	4	4
1016	2026/4/7 16:59:49	114秒	微信	N/A	223.104.194.162(山东-济南)	177	2	3	5	1	4	1	1	1	2	2	4	5	5	5	6	5	6	6	5	6	5	6	6	5	6	5	6	6	5	6	5	5	6	5	6	6	6	5	6	5	6	6	5
1017	2026/4/7 16:59:53	214秒	微信	N/A	112.224.220.157(山东-济南)	128	2	3	2	1	2	3	3	1	1	2	4	4	5	3	3	5	4	4	4	4	4	4	4	4	4	4	4	4	4	4	4	4	4	4	4	4	4	4	4	4	4	4	4
1018	2026/4/7 16:59:57	63秒	微信	N/A	112.224.191.162(山东-济南)	224	1	1	3	1	2	3	3	1	1	1	1	7	7	7	7	7	7	7	7	7	7	7	7	7	7	7	7	7	7	7	7	7	7	7	7	7	7	7	7	7	7	7	7
1019	2026/4/7 16:59:59	55秒	微信	N/A	223.104.194.162(山东-济南)	166	1	1	1	1	4	2	1	2	2	1	1	6	5	5	5	5	5	5	5	5	5	5	5	5	5	5	5	5	5	5	5	5	5	5	5	5	6	6	6	6	5	6	5
1020	2026/4/7 17:00:00	122秒	微信	N/A	39.144.109.159(山东-聊城)	163	1	3	1	1	4	1	1	1	1	1	1	5	5	5	5	5	5	5	5	6	6	6	5	5	4	4	5	6	5	5	5	5	5	6	5	5	5	5	5	5	5	5	5
1021	2026/4/7 17:00:01	130秒	微信	N/A	112.230.183.98(山东-济南)	128	1	1	1	1	3	1	1	2	1	3	4	4	4	4	4	4	4	4	4	4	4	4	4	4	4	4	4	4	4	4	4	4	4	4	4	4	4	4	4	4	4	4	4
1022	2026/4/7 17:00:06	50秒	微信	N/A	182.39.182.160(山东-枣庄)	74	1	1	1	1	1	1	1	1	1	1	1	1	1	1	5	1	4	5	4	1	4	4	4	1	4	4	4	2	1	2	2	1	2	2	2	2	2	2	2	1	1	1	1
1023	2026/4/7 17:00:10	148秒	微信	N/A	112.53.79.14(山东-济南)	171	2	3	5	1	3	1	1	1	2	1	1	7	6	6	5	6	5	7	6	6	5	5	5	6	6	5	4	5	6	5	6	4	5	5	6	4	5	5	5	5	5	5	5
1024	2026/4/7 17:00:11	159秒	微信	N/A	39.144.109.162(山东-聊城)	224	1	1	1	1	4	2	1	3	1	2	1	7	7	7	7	7	7	7	7	7	7	7	7	7	7	7	7	7	7	7	7	7	7	7	7	7	7	7	7	7	7	7	7
1025	2026/4/7 17:00:21	164秒	微信	N/A	223.104.194.133(山东-济南)	127	2	1	1	1	4	1	1	1	2	1	1	5	3	5	5	2	4	3	4	4	5	4	5	3	4	4	4	6	4	4	3	3	4	3	4	4	4	4	4	5	4	4	3
1026	2026/4/7 17:00:29	82秒	微信	N/A	123.233.72.145(山东-济南)	196	2	2	2	1	3	2	3	3	2	1	1	7	5	6	7	6	7	5	6	7	6	6	6	6	6	6	7	7	6	6	5	7	6	5	6	6	7	6	6	6	7	5	6
1027	2026/4/7 17:00:46	138秒	微信	N/A	218.58.41.201(山东-济南)	128	2	1	5	2	3	1	1	1	2	3	4	4	4	4	4	4	4	4	4	4	4	4	4	4	4	4	4	4	4	4	4	4	4	4	4	4	4	4	4	4	4	4	4
1028	2026/4/7 17:00:47	103秒	微信	N/A	223.99.163.165(山东-济南)	128	2	1	1	1	4	2	1	1	1	1	1	4	4	4	4	4	4	4	4	4	4	4	4	4	4	4	4	4	4	4	4	4	4	4	4	4	4	4	4	4	4	4	4
1029	2026/4/7 17:00:47	149秒	微信	N/A	223.104.194.187(山东-济南)	135	1	1	1	1	2	2	2	2	2	2	4	4	4	4	4	4	4	4	4	4	4	4	4	3	1	4	3	5	4	4	5	4	7	4	4	4	7	7	7	4	3	4	3
1030	2026/4/7 17:00:53	237秒	微信	N/A	39.144.109.153(山东-聊城)	210	1	1	3	1	4	1	2	3	1	1	1	7	7	7	7	7	6	7	6	6	7	6	6	6	6	6	6	7	7	7	7	7	6	7	7	7	6	7	7	6	6	7	6
1031	2026/4/7 17:00:55	90秒	微信	N/A	112.224.224.176(山东-济南)	160	2	2	2	1	3	1	1	2	1	1	1	5	5	5	5	5	5	5	5	5	5	5	5	5	5	5	5	5	5	5	5	5	5	5	5	5	5	5	5	5	5	5	5
1032	2026/4/7 17:01:10	67秒	微信	N/A	113.127.95.151(山东-济南)	131	2	3	2	1	4	1	1	3	1	1	1	2	2	3	6	5	3	4	5	3	5	4	3	4	4	4	3	6	4	5	6	5	5	3	5	3	5	3	5	4	4	4	4
1033	2026/4/7 17:01:16	329秒	微信	N/A	112.224.141.237(山东-济南)	177	2	1	3	1	4	1	1	3	2	2	1	5	4	6	6	6	4	6	6	7	6	6	6	5	5	5	5	7	4	6	5	2	7	4	5	7	6	6	6	6	6	6	6
1034	2026/4/7 17:01:24	199秒	微信	N/A	223.99.163.166(山东-济南)	144	2	1	3	1	4	1	3	1	1	1	1	5	2	5	5	5	5	5	5	2	2	2	5	3	2	5	3	7	3	5	4	1	4	3	3	7	7	7	7	7	7	7	4
1035	2026/4/7 17:01:25	163秒	微信	N/A	112.224.223.29(山东-济南)	163	2	3	2	1	2	2	2	2	2	2	3	6	5	5	5	5	5	6	6	5	5	5	5	6	4	5	5	7	5	5	4	5	6	5	5	5	5	5	6	5	4	4	4
1036	2026/4/7 17:01:28	1296秒	微信	N/A	182.33.170.51(山东-潍坊)	123	1	1	5	1	4	2	2	2	2	2	4	3	4	4	4	4	4	4	3	3	3	3	4	4	4	4	4	4	4	4	4	4	4	4	4	4	4	4	4	4	4	4	4
1037	2026/4/7 17:01:38	330秒	微信	N/A	112.53.79.11(山东-济南)	192	1	1	3	1	4	1	1	3	2	2	2	7	7	4	7	7	7	7	7	4	4	4	7	7	7	7	7	7	4	4	4	4	7	5	7	7	4	7	7	4	7	7	7
1038	2026/4/7 17:01:38	287秒	微信	N/A	223.99.163.166(山东-济南)	158	2	1	3	1	2	1	1	4	2	2	2	5	4	6	4	5	5	6	5	2	4	4	7	5	4	4	4	6	4	5	4	4	5	3	5	7	7	7	7	5	5	6	4
1039	2026/4/7 17:01:54	233秒	微信	N/A	39.144.109.141(山东-聊城)	128	2	1	3	1	2	3	1	5	2	3	4	3	3	3	3	3	3	2	6	7	7	6	6	4	2	2	5	4	6	3	4	2	7	2	3	4	4	4	5	4	4	4	3
1040	2026/4/7 17:01:59	206秒	微信	N/A	223.104.194.130(山东-济南)	175	1	1	2	1	3	1	1	5	2	1	1	4	4	7	7	4	7	7	4	4	4	4	4	4	7	4	7	7	6	6	4	4	4	4	5	7	7	7	7	6	5	7	7
1041	2026/4/7 17:02:01	343秒	微信	N/A	39.144.109.175(山东-聊城)	108	2	1	1	1	4	1	1	3	2	1	1	4	2	3	2	3	3	4	4	3	3	3	3	3	3	3	3	4	3	3	3	3	3	4	3	4	4	4	5	4	4	4	4
1042	2026/4/7 17:02:03	80秒	微信	N/A	39.144.109.171(山东-聊城)	128	2	3	2	1	2	3	2	1	1	2	1	4	4	4	4	4	4	4	4	4	4	4	4	4	4	4	4	4	4	4	4	4	4	4	4	4	4	4	4	4	4	4	4
1043	2026/4/7 17:02:24	88秒	微信	N/A	112.224.163.26(山东-济南)	128	2	1	3	1	2	1	1	3	2	3	1	4	4	4	4	4	4	4	4	4	4	4	4	4	4	4	4	4	4	4	4	4	4	4	4	4	4	4	4	4	4	4	4
1044	2026/4/7 17:02:38	80秒	微信	N/A	39.144.109.162(山东-聊城)	131	2	1	3	1	3	2	2	2	2	1	4	4	4	4	4	4	4	4	4	4	4	4	4	4	4	4	4	4	4	4	4	4	4	4	4	4	4	4	4	4	5	5	5
1045	2026/4/7 17:02:45	61秒	微信	N/A	112.224.221.191(山东-济南)	128	1	3	1	1	4	3	1	3	1	2	1	4	4	4	4	4	4	4	4	4	4	4	4	4	4	4	4	4	4	4	4	4	4	4	4	4	4	4	4	4	4	4	4
1046	2026/4/7 17:02:57	71秒	微信	N/A	112.224.218.174(山东-济南)	128	1	3	1	1	2	2	1	1	1	2	4	4	4	4	4	4	4	4	4	4	4	4	4	4	4	4	4	4	4	4	4	4	4	4	4	4	4	4	4	4	4	4	4
1047	2026/4/7 17:03:04	73秒	微信	N/A	223.160.165.60(山东-济南)	224	1	3	1	1	4	1	1	2	1	2	1	7	7	7	7	7	7	7	7	7	7	7	7	7	7	7	7	7	7	7	7	7	7	7	7	7	7	7	7	7	7	7	7
1048	2026/4/7 17:03:10	462秒	微信	N/A	223.104.194.166(山东-济南)	67	1	1	3	1	4	1	1	2	1	1	1	2	4	3	2	2	2	2	2	2	2	2	2	2	2	2	2	2	2	2	2	2	2	2	2	2	2	2	2	2	2	2	2
1049	2026/4/7 17:03:11	79秒	微信	N/A	39.144.109.171(山东-聊城)	224	1	1	1	2	4	1	1	2	2	1	1	7	7	7	7	7	7	7	7	7	7	7	7	7	7	7	7	7	7	7	7	7	7	7	7	7	7	7	7	7	7	7	7
1050	2026/4/7 17:03:11	143秒	微信	N/A	223.104.194.136(山东-济南)	129	2	1	1	1	4	1	1	1	2	1	1	4	3	5	4	3	3	4	4	4	4	4	7	4	4	4	4	4	4	4	4	4	4	4	4	4	4	4	4	4	4	4	4
1051	2026/4/7 17:03:20	57秒	微信	N/A	39.144.109.51(山东-聊城)	160	1	3	1	1	3	1	1	5	2	2	1	5	5	5	5	5	5	5	5	5	5	5	5	5	5	5	5	5	5	5	5	5	5	5	5	5	5	5	5	5	5	5	5
1052	2026/4/7 17:03:23	69秒	微信	N/A	223.104.194.160(山东-济南)	224	2	3	2	1	2	2	1	1	1	1	4	7	7	7	7	7	7	7	7	7	7	7	7	7	7	7	7	7	7	7	7	7	7	7	7	7	7	7	7	7	7	7	7
1053	2026/4/7 17:03:26	80秒	微信	N/A	39.144.109.28(山东-聊城)	224	1	1	2	1	2	3	3	3	1	2	1	7	7	7	7	7	7	7	7	7	7	7	7	7	7	7	7	7	7	7	7	7	7	7	7	7	7	7	7	7	7	7	7
1054	2026/4/7 17:03:26	79秒	微信	N/A	223.104.194.189(山东-济南)	72	2	1	2	1	2	1	2	2	1	1	4	3	3	3	3	3	3	3	2	2	2	2	3	2	2	2	2	2	2	2	2	3	2	2	2	2	2	3	3	2	1	1	1
1055	2026/4/7 17:03:28	203秒	微信	N/A	39.144.109.163(山东-聊城)	169	2	1	5	2	4	1	1	3	2	2	4	6	5	6	7	6	5	6	5	5	5	6	4	6	5	4	6	6	4	6	4	6	5	4	5	5	6	5	6	6	4	5	5
1056	2026/4/7 17:03:29	82秒	微信	N/A	112.53.79.13(山东-济南)	123	2	1	3	1	4	1	1	2	2	2	2	4	3	5	3	3	3	4	3	4	3	4	3	4	4	3	4	3	4	4	5	4	5	5	5	3	4	5	4	4	4	4	3
1057	2026/4/7 17:03:32	63秒	微信	N/A	112.53.79.13(山东-济南)	160	1	1	5	1	4	1	1	3	1	2	4	5	5	5	5	5	5	5	5	5	5	5	5	5	5	5	5	5	5	5	5	5	5	5	5	5	5	5	5	5	5	5	5
1058	2026/4/7 17:03:39	92秒	微信	N/A	223.104.194.182(山东-济南)	203	2	1	3	1	2	2	2	2	1	1	1	7	7	7	6	6	4	6	4	6	6	5	6	6	7	6	6	7	7	7	6	6	7	7	7	7	7	6	7	7	7	6	7
1059	2026/4/7 17:03:45	114秒	微信	N/A	223.104.194.171(山东-济南)	145	2	3	1	2	4	1	1	4	2	1	4	4	4	4	6	5	6	5	5	5	5	5	5	5	5	5	5	5	5	4	4	4	4	4	4	4	4	4	4	4	4	4	4
1060	2026/4/7 17:03:47	76秒	微信	N/A	223.99.163.165(山东-济南)	224	1	1	1	1	1	4	4	1	1	1	1	7	7	7	7	7	7	7	7	7	7	7	7	7	7	7	7	7	7	7	7	7	7	7	7	7	7	7	7	7	7	7	7
1061	2026/4/7 17:03:53	105秒	微信	N/A	218.58.41.2(山东-济南)	224	1	1	1	1	2	3	2	1	1	1	1	7	7	7	7	7	7	7	7	7	7	7	7	7	7	7	7	7	7	7	7	7	7	7	7	7	7	7	7	7	7	7	7
1062	2026/4/7 17:04:08	91秒	微信	N/A	112.53.79.12(山东-济南)	102	2	1	4	1	4	1	1	5	2	2	1	3	3	3	6	3	3	6	3	3	3	3	3	3	3	3	3	3	3	3	3	3	3	3	3	3	3	3	3	3	3	3	3
1063	2026/4/7 17:04:10	65秒	微信	N/A	39.144.109.155(山东-聊城)	89	2	1	1	1	1	1	1	1	1	1	1	1	3	1	1	1	3	3	3	1	3	3	5	1	3	4	5	1	3	4	5	1	3	5	4	1	3	5	4	3	2	2	2
1064	2026/4/7 17:04:11	91秒	微信	N/A	39.144.109.139(山东-聊城)	128	1	1	3	1	3	1	2	3	2	1	1	4	4	4	4	4	4	4	4	4	4	4	4	4	4	4	4	4	4	4	4	4	4	4	4	4	4	4	4	4	4	4	4
1065	2026/4/7 17:04:22	66秒	微信	N/A	39.144.112.18(山东-临沂)	153	1	1	5	1	4	1	1	5	2	3	4	3	2	3	4	4	5	3	5	5	6	5	4	5	5	6	6	4	5	6	7	5	4	5	5	5	5	6	6	4	5	5	5
1066	2026/4/7 17:04:28	59秒	微信	N/A	112.224.163.179(山东-济南)	32	2	1	3	1	4	1	1	1	1	1	1	1	1	1	1	1	1	1	1	1	1	1	1	1	1	1	1	1	1	1	1	1	1	1	1	1	1	1	1	1	1	1	1
1067	2026/4/7 17:04:28	476秒	微信	N/A	223.104.194.179(山东-济南)	141	2	1	1	1	4	1	1	1	1	2	1	4	3	5	4	4	3	5	5	4	4	4	5	4	5	5	5	4	4	4	4	4	5	5	5	5	5	5	5	4	4	5	4
1068	2026/4/7 17:04:31	88秒	微信	N/A	182.33.231.19(山东-潍坊)	176	2	1	3	1	4	1	1	2	2	1	1	5	5	5	5	5	5	5	5	5	5	5	5	5	5	5	5	6	6	6	6	6	6	6	6	6	6	6	6	6	6	6	6
1069	2026/4/7 17:04:36	77秒	微信	N/A	144.12.177.112(山东-聊城)	224	1	3	1	2	4	1	1	2	1	2	4	7	7	7	7	7	7	7	7	7	7	7	7	7	7	7	7	7	7	7	7	7	7	7	7	7	7	7	7	7	7	7	7
1070	2026/4/7 17:04:39	114秒	微信	N/A	111.55.120.41(山东-济南)	161	1	1	3	1	4	1	1	5	1	2	1	2	2	4	7	7	7	7	7	4	4	4	4	4	4	4	4	5	5	4	5	4	3	2	2	7	7	7	7	7	7	7	7
1071	2026/4/7 17:05:04	93秒	微信	N/A	223.104.194.143(山东-济南)	128	1	1	5	1	1	2	2	4	1	1	1	4	4	4	4	4	4	4	4	4	4	4	4	4	4	4	4	4	4	4	4	4	4	4	4	4	4	4	4	4	4	4	4
1072	2026/4/7 17:05:08	116秒	微信	N/A	223.104.194.109(山东-济南)	224	2	3	2	1	4	1	1	1	1	1	1	7	7	7	7	7	7	7	7	7	7	7	7	7	7	7	7	7	7	7	7	7	7	7	7	7	7	7	7	7	7	7	7
1073	2026/4/7 17:05:09	172秒	微信	N/A	124.133.254.198(山东-济南)	98	1	1	5	1	2	2	2	3	2	2	4	3	3	3	3	4	3	4	3	3	3	3	3	3	3	3	3	3	3	3	3	3	3	3	3	3	3	3	3	3	3	3	3
1074	2026/4/7 17:05:18	55秒	微信	N/A	112.224.228.30(山东-济南)	224	1	1	1	1	1	4	4	1	1	1	1	7	7	7	7	7	7	7	7	7	7	7	7	7	7	7	7	7	7	7	7	7	7	7	7	7	7	7	7	7	7	7	7
1075	2026/4/7 17:05:23	94秒	微信	N/A	112.224.191.95(山东-济南)	223	2	1	5	1	2	2	2	3	2	1	1	7	7	7	7	7	7	7	7	7	7	7	7	7	7	7	7	7	7	7	7	7	7	7	7	7	6	7	7	7	7	7	7
1076	2026/4/7 17:05:25	88秒	微信	N/A	39.144.109.178(山东-聊城)	128	2	3	2	1	4	1	1	3	1	1	1	4	4	4	4	4	4	4	4	4	4	4	4	4	4	4	4	4	4	4	4	4	4	4	4	4	4	4	4	4	4	4	4
1077	2026/4/7 17:05:28	129秒	微信	N/A	39.144.109.183(山东-聊城)	128	2	1	5	2	1	2	2	1	2	1	1	4	4	4	4	4	4	4	4	4	4	4	4	4	4	4	4	4	4	4	4	4	4	4	4	4	4	4	4	4	4	4	4
1078	2026/4/7 17:05:35	501秒	微信	N/A	39.144.109.137(山东-聊城)	199	1	1	3	1	2	2	3	2	1	1	2	7	5	7	6	6	5	7	7	7	7	7	7	5	5	7	7	7	6	5	5	5	7	5	5	7	7	7	7	7	6	6	5
1079	2026/4/7 17:05:49	214秒	微信	N/A	39.144.109.163(山东-聊城)	161	1	1	5	1	4	1	1	4	2	2	1	6	3	5	4	6	6	5	5	6	6	6	6	5	5	4	4	5	4	4	4	3	4	3	4	6	6	6	6	6	6	6	6
1080	2026/4/7 17:05:51	433秒	微信	N/A	223.99.163.166(山东-济南)	160	2	1	2	1	4	3	2	1	1	1	4	7	5	4	7	4	4	5	5	5	5	5	5	4	4	4	4	7	5	4	5	3	7	6	6	5	5	5	6	5	5	5	4
1081	2026/4/7 17:05:52	76秒	微信	N/A	223.99.163.166(山东-济南)	224	2	1	5	1	2	2	2	3	1	2	1	7	7	7	7	7	7	7	7	7	7	7	7	7	7	7	7	7	7	7	7	7	7	7	7	7	7	7	7	7	7	7	7
1082	2026/4/7 17:05:53	173秒	微信	N/A	223.160.165.158(山东-济南)	128	1	1	5	1	4	1	1	4	2	1	1	6	5	4	4	5	4	4	3	3	3	3	3	3	4	3	4	6	4	3	3	3	2	2	5	6	6	6	6	4	4	4	3
1083	2026/4/7 17:06:05	94秒	微信	N/A	112.53.79.13(山东-济南)	139	1	1	1	1	3	1	1	4	2	1	1	4	4	4	4	3	3	3	3	5	5	6	5	3	4	3	4	3	4	3	5	5	6	5	6	5	4	4	4	5	6	5	6
1084	2026/4/7 17:06:07	114秒	微信	N/A	223.104.194.163(山东-济南)	135	2	3	5	1	4	1	1	3	2	3	1	4	2	4	5	4	4	5	5	4	4	5	5	5	5	5	5	6	3	4	1	1	2	2	5	5	5	5	5	5	5	5	5
1085	2026/4/7 17:06:12	89秒	微信	N/A	223.104.194.187(山东-济南)	160	2	3	2	1	4	1	1	2	2	3	1	5	5	5	5	5	5	5	5	5	5	5	5	5	5	5	5	5	5	5	5	5	5	5	5	5	5	5	5	5	5	5	5
1086	2026/4/7 17:06:25	347秒	微信	N/A	112.53.79.13(山东-济南)	141	1	1	1	1	4	1	1	4	2	2	4	5	2	4	6	3	2	5	5	4	4	2	6	4	4	5	4	6	4	6	2	2	6	6	4	5	4	6	6	4	5	6	4
1087	2026/4/7 17:06:45	482秒	微信	N/A	223.104.194.189(山东-济南)	224	2	3	2	1	2	3	2	4	2	3	4	7	7	7	7	7	7	7	7	7	7	7	7	7	7	7	7	7	7	7	7	7	7	7	7	7	7	7	7	7	7	7	7
1088	2026/4/7 17:07:03	292秒	微信	N/A	112.53.79.14(山东-济南)	180	2	1	5	1	4	1	1	2	2	3	4	5	5	5	6	6	6	5	5	3	4	5	5	5	5	5	5	7	6	6	6	4	7	6	6	7	7	7	7	6	6	6	6
1089	2026/4/7 17:07:08	39秒	微信	N/A	223.104.194.128(山东-济南)	163	1	1	2	2	2	2	4	2	2	2	2	6	6	5	5	5	4	4	4	5	5	5	5	7	5	5	6	4	5	5	5	5	5	5	5	6	5	5	5	6	5	5	5
1090	2026/4/7 17:07:24	257秒	微信	N/A	39.144.109.172(山东-聊城)	140	2	3	2	1	4	1	2	1	2	2	3	4	4	3	6	4	3	4	4	4	4	4	4	5	5	6	6	5	4	5	4	3	4	4	5	4	4	5	6	4	4	5	4
1091	2026/4/7 17:07:46	99秒	微信	N/A	112.224.161.252(山东-济南)	144	1	1	1	1	4	2	2	2	1	1	1	7	1	7	7	4	4	4	4	4	4	4	4	4	4	4	4	4	4	5	4	5	5	3	5	5	7	5	4	5	5	4	4
1092	2026/4/7 17:07:49	107秒	微信	N/A	182.34.131.198(山东-淄博)	160	2	4	2	1	4	1	2	4	1	1	3	5	5	5	5	5	5	5	5	5	5	5	5	5	5	5	5	5	5	5	5	5	5	5	5	5	5	5	5	5	5	5	5
1093	2026/4/7 17:08:23	175秒	微信	N/A	223.104.194.156(山东-济南)	224	1	2	2	1	4	1	1	1	1	1	1	7	7	7	7	7	7	7	7	7	7	7	7	7	7	7	7	7	7	7	7	7	7	7	7	7	7	7	7	7	7	7	7
1094	2026/4/7 17:08:52	170秒	微信	N/A	39.144.109.171(山东-聊城)	180	2	1	3	1	3	1	1	2	1	1	3	4	5	5	5	4	4	5	4	4	4	4	4	6	6	6	6	7	7	7	4	4	5	7	7	7	7	7	7	7	7	7	7
1095	2026/4/7 17:09:09	78秒	微信	N/A	39.144.109.181(山东-聊城)	186	2	3	2	1	4	2	2	1	1	1	4	6	5	6	5	7	6	7	4	5	5	6	6	5	5	6	6	5	6	6	7	6	6	6	6	6	6	6	6	6	6	6	6
1096	2026/4/7 17:09:10	74秒	微信	N/A	112.224.190.22(山东-济南)	186	1	3	5	1	3	2	2	4	1	1	1	5	6	5	6	6	5	5	5	5	6	6	5	5	6	5	6	6	5	5	5	6	6	7	6	7	7	7	7	6	6	7	6
1097	2026/4/7 17:09:18	80秒	微信	N/A	223.99.163.164(山东-济南)	131	2	1	3	1	2	2	2	4	2	1	2	4	4	4	4	4	4	4	4	4	4	3	4	4	5	5	4	4	5	4	4	4	5	4	4	3	4	4	4	4	5	4	4
1098	2026/4/7 17:09:41	71秒	微信	N/A	223.104.194.156(山东-济南)	206	1	3	1	1	2	3	2	1	2	2	1	6	4	7	6	5	5	5	5	6	6	6	6	6	7	7	7	7	7	7	7	7	7	7	7	7	7	7	7	7	7	7	7
1099	2026/4/7 17:09:51	70秒	微信	N/A	39.144.109.150(山东-聊城)	160	2	3	2	1	4	1	1	2	2	2	2	5	5	5	5	5	5	5	5	5	5	5	5	5	5	5	5	5	5	5	5	5	5	5	5	5	5	5	5	5	5	5	5
1100	2026/4/7 17:10:11	239秒	微信	N/A	39.144.109.179(山东-聊城)	158	2	1	3	1	2	2	2	1	1	2	2	5	5	5	6	6	5	5	4	4	4	5	6	5	5	5	5	5	4	4	4	4	5	5	5	5	5	6	7	5	4	5	5
1101	2026/4/7 17:10:18	72秒	微信	N/A	39.144.109.134(山东-聊城)	163	2	1	5	1	4	1	1	3	2	3	1	7	5	5	6	5	5	4	4	6	5	5	6	6	5	5	6	5	5	6	6	5	5	6	5	5	6	4	3	4	6	4	3
1102	2026/4/7 17:10:34	506秒	微信	N/A	39.144.109.175(山东-聊城)	175	2	1	3	1	4	1	1	1	2	2	4	5	5	6	6	5	5	5	5	6	5	5	6	6	5	5	5	6	5	5	5	4	6	5	6	6	6	6	6	6	6	6	6
1103	2026/4/7 17:10:43	93秒	微信	N/A	112.53.79.12(山东-济南)	202	1	1	3	1	3	2	2	5	2	1	4	6	6	6	6	6	6	7	6	4	5	6	5	6	7	5	7	7	7	7	7	6	7	6	7	7	6	7	7	7	6	7	7
1104	2026/4/7 17:10:47	82秒	微信	N/A	117.136.92.145(山东-青岛)	175	1	2	5	1	2	3	3	2	1	1	1	4	5	5	7	4	4	5	6	5	6	7	5	6	4	5	6	6	6	6	5	6	5	6	5	6	5	6	6	6	5	6	6
1105	2026/4/7 17:11:04	297秒	微信	N/A	223.104.194.178(山东-济南)	134	2	1	3	1	3	2	3	3	1	1	3	4	3	3	4	3	3	5	4	4	4	3	4	4	3	5	4	7	4	4	4	3	4	6	4	5	5	4	5	5	4	5	5
1106	2026/4/7 17:11:11	69秒	微信	N/A	223.99.163.165(山东-济南)	126	2	1	2	2	4	2	2	2	2	1	4	4	4	3	3	4	4	4	4	4	4	4	4	4	4	4	4	4	4	4	4	4	4	4	4	4	4	4	4	4	4	4	4
1107	2026/4/7 17:11:22	73秒	微信	N/A	112.224.223.254(山东-济南)	176	1	1	3	1	1	3	3	1	1	1	4	4	4	4	4	4	4	4	4	4	4	4	4	4	4	4	4	7	7	7	7	7	7	7	7	7	7	7	7	7	7	7	7
1108	2026/4/7 17:11:57	135秒	微信	N/A	112.224.218.53(山东-济南)	97	1	1	3	1	4	1	1	4	2	2	1	3	2	2	7	2	3	3	3	3	3	3	3	3	3	3	3	3	3	3	3	3	3	3	3	3	3	3	3	3	3	3	3
1109	2026/4/7 17:12:25	167秒	微信	N/A	223.104.194.164(山东-济南)	128	2	3	5	2	4	1	1	4	2	1	4	4	4	4	4	4	4	4	4	4	4	4	4	4	4	4	4	4	4	4	4	4	4	4	4	4	4	4	4	4	4	4	4
1110	2026/4/7 17:12:49	154秒	微信	N/A	223.104.194.138(山东-济南)	128	2	3	2	1	2	2	2	2	2	2	1	4	4	4	4	4	4	4	4	4	4	4	4	4	4	4	4	4	4	4	4	4	4	4	4	4	4	4	4	4	4	4	4
1111	2026/4/7 17:13:00	183秒	微信	N/A	39.82.86.233(山东-济南)	224	2	3	2	1	2	3	3	4	2	3	4	7	7	7	7	7	7	7	7	7	7	7	7	7	7	7	7	7	7	7	7	7	7	7	7	7	7	7	7	7	7	7	7
1112	2026/4/7 17:13:51	179秒	微信	N/A	112.53.79.12(山东-济南)	128	2	3	2	1	2	2	3	4	2	1	4	4	4	4	4	4	4	4	4	4	4	4	4	4	4	4	4	4	4	4	4	4	4	4	4	4	4	4	4	4	4	4	4
1113	2026/4/7 17:13:56	95秒	微信	N/A	223.104.194.177(山东-济南)	160	2	1	3	1	3	3	3	3	1	2	4	5	5	5	5	5	5	5	5	5	5	5	5	5	5	5	5	5	5	5	5	5	5	5	5	5	5	5	5	5	5	5	5
1114	2026/4/7 17:14:10	63秒	微信	N/A	153.119.239.232(山东-济南)	64	1	1	3	1	4	1	1	3	2	2	2	2	2	2	2	2	2	2	2	2	2	2	2	2	2	2	2	2	2	2	2	2	2	2	2	2	2	2	2	2	2	2	2
1115	2026/4/7 17:14:41	108秒	微信	N/A	39.144.109.174(山东-聊城)	160	1	2	2	2	2	1	1	1	2	3	3	5	5	5	5	5	5	5	5	5	5	5	5	5	5	5	5	5	5	5	5	5	5	5	5	5	5	5	5	5	5	5	5
1116	2026/4/7 17:14:47	138秒	微信	N/A	112.224.218.167(山东-济南)	129	1	3	2	1	4	1	1	4	2	2	1	4	3	4	5	4	3	4	4	3	5	3	4	4	5	4	4	4	4	5	4	4	4	4	4	4	4	5	4	4	5	4	3
1117	2026/4/7 17:15:14	63秒	微信	N/A	39.144.109.174(山东-聊城)	224	2	2	2	2	1	4	4	4	2	1	1	7	7	7	7	7	7	7	7	7	7	7	7	7	7	7	7	7	7	7	7	7	7	7	7	7	7	7	7	7	7	7	7
1118	2026/4/7 17:15:23	1572秒	微信	N/A	223.104.194.159(山东-济南)	75	2	1	3	1	2	1	1	3	2	1	4	2	1	4	2	1	1	1	1	1	2	1	3	2	1	1	1	6	1	4	2	1	5	4	4	2	2	2	6	1	4	4	2
1119	2026/4/7 17:15:52	109秒	微信	N/A	112.232.212.130(山东-济南)	120	2	2	2	1	4	2	1	5	2	1	1	4	4	4	4	4	4	4	4	4	4	4	4	4	4	4	4	4	4	4	4	3	4	3	4	4	3	3	4	3	3	3	3
1120	2026/4/7 17:15:56	72秒	微信	N/A	39.144.109.128(山东-聊城)	224	2	1	3	1	4	1	1	1	1	1	1	7	7	7	7	7	7	7	7	7	7	7	7	7	7	7	7	7	7	7	7	7	7	7	7	7	7	7	7	7	7	7	7
1121	2026/4/7 17:16:15	620秒	微信	N/A	223.104.194.165(山东-济南)	108	2	1	3	1	4	1	1	5	2	1	4	4	3	4	4	4	3	3	3	3	3	4	4	3	3	3	3	4	4	3	3	2	4	4	4	3	3	4	4	3	3	3	3
1122	2026/4/7 17:16:40	101秒	微信	N/A	223.104.194.166(山东-济南)	138	1	1	5	1	1	2	1	5	2	2	4	4	1	4	5	5	6	4	2	4	6	3	5	5	7	4	5	3	4	4	4	3	4	3	4	4	6	5	6	4	5	4	5
1123	2026/4/7 17:17:17	129秒	微信	N/A	112.224.220.127(山东-济南)	119	1	2	2	1	3	2	2	3	1	1	1	4	3	4	5	3	3	4	3	4	4	4	4	4	4	4	4	4	4	4	4	4	4	4	4	3	3	2	2	4	4	4	4
1124	2026/4/7 17:17:19	115秒	微信	N/A	112.224.160.239(山东-济南)	128	1	2	2	1	4	1	1	4	2	3	3	4	4	4	4	4	4	4	4	4	4	4	4	4	4	4	4	4	4	4	4	4	4	4	4	4	4	4	4	4	4	4	4
1125	2026/4/7 17:17:24	1664秒	微信	N/A	223.104.194.160(山东-济南)	99	2	1	3	1	3	1	1	3	2	2	4	5	4	4	5	3	3	3	3	3	3	3	3	3	3	3	3	3	2	3	2	2	3	2	2	3	4	4	4	3	3	3	2
1126	2026/4/7 17:17:33	143秒	微信	N/A	223.104.194.161(山东-济南)	165	2	1	2	1	2	2	1	3	2	2	4	4	5	6	5	7	5	5	5	5	6	6	6	4	5	5	5	5	5	5	5	5	5	5	5	5	5	5	5	5	5	6	5
1127	2026/4/7 17:17:51	103秒	微信	N/A	123.233.72.35(山东-济南)	160	1	2	2	1	2	2	1	3	1	1	2	5	5	5	5	5	5	5	5	5	5	5	5	5	5	5	5	5	5	5	5	5	5	5	5	5	5	5	5	5	5	5	5
1128	2026/4/7 17:17:59	1113秒	微信	N/A	39.144.109.145(山东-聊城)	194	2	3	2	1	1	3	2	1	2	1	3	1	1	7	7	7	7	7	7	7	7	7	7	7	5	6	7	7	7	5	5	7	5	6	6	7	6	6	6	6	6	6	6
1129	2026/4/7 17:18:05	68秒	微信	N/A	223.99.163.164(山东-济南)	158	2	1	5	1	3	1	1	2	2	2	4	6	5	3	5	4	6	3	5	5	5	4	5	5	4	4	3	5	3	5	5	5	6	5	6	6	6	6	6	6	5	5	6
1130	2026/4/7 17:18:29	119秒	微信	N/A	112.224.217.60(山东-济南)	128	2	3	1	1	4	1	1	1	1	2	4	4	4	4	4	4	4	4	4	4	4	4	4	4	4	4	4	4	4	4	4	4	4	4	4	4	4	4	4	4	4	4	4
1131	2026/4/7 17:18:38	135秒	微信	N/A	112.224.160.248(山东-济南)	124	2	1	5	1	4	1	1	1	2	1	1	4	3	3	3	4	1	4	3	4	3	4	4	4	4	4	4	4	4	4	4	4	4	4	4	4	4	4	4	5	5	5	5
1132	2026/4/7 17:18:41	121秒	微信	N/A	112.224.161.80(山东-济南)	160	2	3	2	1	2	1	1	1	1	1	1	5	5	5	5	5	5	5	5	5	5	5	5	5	5	5	5	5	5	5	5	5	5	5	5	5	5	5	5	5	5	5	5
1133	2026/4/7 17:18:43	129秒	微信	N/A	116.169.6.146(四川-成都)	149	2	3	2	1	2	2	2	3	2	2	4	2	2	7	3	5	5	5	5	6	6	6	5	1	1	1	5	6	7	5	3	4	7	4	4	5	5	5	5	6	6	6	6
1134	2026/4/7 17:18:55	145秒	微信	N/A	112.224.19.111(山东-济南)	44	1	1	1	1	4	1	1	2	2	1	4	7	1	1	6	1	1	1	1	1	1	1	1	1	2	1	1	1	1	1	1	1	1	1	1	1	1	1	1	1	1	1	1
1135	2026/4/7 17:19:07	80秒	微信	N/A	39.144.109.150(山东-聊城)	224	2	1	1	1	4	1	1	2	2	1	1	7	7	7	7	7	7	7	7	7	7	7	7	7	7	7	7	7	7	7	7	7	7	7	7	7	7	7	7	7	7	7	7
1136	2026/4/7 17:19:10	83秒	微信	N/A	112.230.183.240(山东-济南)	140	1	2	2	1	4	3	2	5	2	3	1	5	5	5	5	5	5	5	5	5	5	5	5	5	5	5	5	3	3	3	3	4	4	4	4	4	4	4	4	4	4	4	4
1137	2026/4/7 17:19:25	61秒	微信	N/A	39.144.109.187(山东-聊城)	192	1	2	2	1	2	3	2	3	1	2	1	7	7	7	6	6	5	5	5	5	5	5	5	5	6	6	5	5	6	5	5	6	6	6	7	7	7	7	7	7	7	7	7
1138	2026/4/7 17:19:44	65秒	微信	N/A	112.224.161.134(山东-济南)	128	2	2	5	1	4	2	2	2	2	1	4	4	4	4	4	4	4	4	4	4	4	4	4	4	4	4	4	4	4	4	4	4	4	4	4	4	4	4	4	4	4	4	4
1139	2026/4/7 17:19:53	129秒	微信	N/A	112.53.79.13(山东-济南)	127	2	2	2	1	4	1	2	5	2	1	1	5	4	5	1	4	4	4	4	4	4	4	4	4	4	4	4	4	4	4	4	4	4	4	4	4	4	4	4	4	4	4	4
1140	2026/4/7 17:19:58	46秒	微信	N/A	39.144.109.176(山东-聊城)	149	2	3	2	1	2	2	2	3	2	2	1	4	5	5	4	5	5	5	4	5	4	5	4	5	4	5	6	5	4	5	5	5	4	5	5	4	5	5	4	5	4	5	4
1141	2026/4/7 17:19:58	99秒	微信	N/A	112.224.218.203(山东-济南)	159	2	2	2	1	2	1	1	1	1	1	1	6	4	4	5	5	5	5	5	5	5	5	5	5	5	5	5	5	5	5	5	5	5	5	5	5	5	5	5	5	5	5	5
1142	2026/4/7 17:20:00	127秒	微信	N/A	39.144.109.140(山东-聊城)	148	1	2	1	2	3	2	3	4	2	1	1	5	5	5	5	5	5	5	5	5	5	5	4	4	4	5	4	4	4	4	4	4	4	4	4	5	5	5	5	5	5	5	5
1143	2026/4/7 17:20:03	66秒	微信	N/A	223.104.194.168(山东-济南)	148	1	2	2	1	4	1	1	4	2	2	1	4	4	4	4	5	5	5	5	4	4	4	4	4	4	4	4	5	5	5	5	5	5	5	5	5	5	5	5	5	5	5	5
1144	2026/4/7 17:20:41	79秒	微信	N/A	223.104.194.152(山东-济南)	128	1	1	2	1	4	1	1	3	2	2	1	4	4	4	4	4	4	4	4	4	4	4	4	4	4	4	4	4	4	4	4	4	4	4	4	4	4	4	4	4	4	4	4
1145	2026/4/7 17:20:54	201秒	微信	N/A	112.230.183.158(山东-济南)	216	2	2	2	1	2	3	3	1	1	1	1	7	7	7	7	7	7	7	7	6	6	6	6	6	6	6	6	7	7	7	7	7	7	7	7	7	7	7	7	7	7	7	7
1146	2026/4/7 17:21:03	96秒	微信	N/A	112.224.161.237(山东-济南)	99	2	1	5	1	2	1	1	5	1	3	4	4	4	4	4	3	3	3	3	4	3	3	3	3	3	3	3	3	3	3	3	2	2	3	3	3	3	3	3	3	3	3	3
1147	2026/4/7 17:21:03	149秒	微信	N/A	112.53.79.13(山东-济南)	143	1	1	5	1	4	2	1	4	1	1	1	5	3	4	6	5	5	6	4	3	4	4	4	4	4	5	5	3	4	4	4	3	5	5	5	5	5	5	5	4	5	5	5
1148	2026/4/7 17:21:28	200秒	微信	N/A	223.104.194.180(山东-济南)	168	2	2	5	1	2	1	1	3	2	1	4	5	5	5	5	6	6	6	6	6	6	6	6	5	5	5	5	5	5	5	5	5	5	5	5	5	5	5	5	5	5	5	5
1149	2026/4/7 17:21:33	98秒	微信	N/A	39.144.109.157(山东-聊城)	224	1	3	1	1	4	1	1	4	2	1	1	7	7	7	7	7	7	7	7	7	7	7	7	7	7	7	7	7	7	7	7	7	7	7	7	7	7	7	7	7	7	7	7
1150	2026/4/7 17:21:36	102秒	微信	N/A	223.104.194.184(山东-济南)	192	2	2	1	1	4	1	1	4	2	1	4	6	6	6	6	6	6	6	6	6	6	6	6	6	6	6	6	6	6	6	6	6	6	6	6	6	6	6	6	6	6	6	6
1151	2026/4/7 17:21:40	231秒	微信	N/A	112.232.212.205(山东-济南)	112	1	3	2	1	2	2	1	4	2	1	1	4	4	4	4	3	3	5	4	3	3	3	4	4	3	5	3	5	3	3	4	3	4	3	3	3	3	3	3	4	3	3	3
1152	2026/4/7 17:21:45	89秒	微信	N/A	112.224.228.220(山东-济南)	96	1	1	3	1	4	1	1	3	2	3	2	2	2	2	6	3	3	3	3	3	3	3	3	3	3	3	3	3	3	3	3	3	3	3	3	3	3	3	3	3	3	3	3
1153	2026/4/7 17:21:49	124秒	微信	N/A	223.104.194.169(山东-济南)	158	2	1	2	2	3	1	2	4	2	1	1	6	5	3	5	5	5	5	5	5	4	4	6	6	5	5	4	5	4	6	4	5	5	5	5	5	4	5	6	5	5	5	6
1154	2026/4/7 17:21:58	132秒	微信	N/A	223.104.194.133(山东-济南)	142	2	2	3	1	1	1	3	1	1	2	3	4	4	5	4	4	4	4	4	5	5	5	5	4	4	4	4	4	4	4	4	4	4	4	4	5	5	6	5	5	5	5	5
1155	2026/4/7 17:21:59	113秒	微信	N/A	223.99.163.166(山东-济南)	224	1	1	1	1	4	1	1	1	1	2	1	7	7	7	7	7	7	7	7	7	7	7	7	7	7	7	7	7	7	7	7	7	7	7	7	7	7	7	7	7	7	7	7
1156	2026/4/7 17:22:24	87秒	微信	N/A	112.224.143.111(山东-济南)	146	2	1	2	1	2	3	1	4	2	2	4	4	4	4	4	4	4	4	4	4	4	4	5	5	5	5	5	5	5	5	5	5	5	5	5	5	5	5	5	4	4	5	4
1157	2026/4/7 17:22:33	101秒	微信	N/A	223.99.163.164(山东-济南)	224	2	1	3	1	2	2	1	2	1	1	4	7	7	7	7	7	7	7	7	7	7	7	7	7	7	7	7	7	7	7	7	7	7	7	7	7	7	7	7	7	7	7	7
1158	2026/4/7 17:22:33	251秒	微信	N/A	223.104.194.154(山东-济南)	224	2	1	2	1	2	2	2	4	2	1	2	7	7	7	7	7	7	7	7	7	7	7	7	7	7	7	7	7	7	7	7	7	7	7	7	7	7	7	7	7	7	7	7
1159	2026/4/7 17:22:39	108秒	微信	N/A	113.126.42.178(山东-济南)	140	2	1	3	1	4	1	1	5	2	2	1	7	7	7	7	4	4	4	4	4	4	4	4	4	4	4	4	4	4	4	4	4	4	4	4	4	4	4	4	4	4	4	4
1160	2026/4/7 17:22:42	626秒	微信	N/A	39.144.109.156(山东-聊城)	165	2	3	2	1	3	2	2	3	2	1	1	5	5	5	5	6	5	5	5	5	6	5	5	5	5	5	5	7	6	5	5	5	5	5	5	5	5	5	5	5	5	5	5
1161	2026/4/7 17:22:54	124秒	微信	N/A	112.224.141.12(山东-济南)	144	2	2	2	1	2	2	2	1	2	2	1	7	7	4	7	4	4	4	6	3	6	6	3	4	4	4	4	7	3	5	3	1	1	7	7	5	4	4	4	4	4	4	4
1162	2026/4/7 17:23:01	132秒	微信	N/A	112.224.227.245(山东-济南)	114	2	1	5	2	2	1	1	3	2	1	1	4	2	3	4	3	3	3	3	3	3	3	3	4	4	5	4	4	4	5	5	2	2	2	4	3	3	2	4	5	5	5	5
1163	2026/4/7 17:23:16	522秒	微信	N/A	223.99.163.166(山东-济南)	148	2	1	2	1	4	1	1	1	2	1	1	6	4	5	5	3	4	4	4	4	5	3	4	6	3	5	5	6	7	6	4	4	5	6	6	4	6	4	5	5	4	4	2
1164	2026/4/7 17:24:40	78秒	微信	N/A	223.160.160.156(山东-济南)	224	1	1	5	1	3	2	2	5	2	3	1	7	7	7	7	7	7	7	7	7	7	7	7	7	7	7	7	7	7	7	7	7	7	7	7	7	7	7	7	7	7	7	7
1165	2026/4/7 17:25:04	96秒	微信	N/A	39.144.109.130(山东-聊城)	144	1	3	1	1	4	1	1	2	2	2	1	4	4	4	4	4	4	4	4	4	4	4	4	4	4	4	4	5	5	5	5	5	5	5	5	5	5	5	5	5	5	5	5
1166	2026/4/7 17:25:17	98秒	微信	N/A	39.144.109.166(山东-聊城)	224	2	1	2	1	4	1	1	3	2	1	3	7	7	7	7	7	7	7	7	7	7	7	7	7	7	7	7	7	7	7	7	7	7	7	7	7	7	7	7	7	7	7	7
1167	2026/4/7 17:25:44	525秒	微信	N/A	39.144.109.175(山东-聊城)	121	2	3	2	1	4	1	2	3	2	2	1	5	4	3	4	4	5	3	4	5	4	5	2	3	3	3	3	5	2	4	1	2	6	3	4	4	6	4	5	4	4	4	3
1168	2026/4/7 17:25:49	402秒	微信	N/A	112.224.161.27(山东-济南)	143	2	1	2	1	2	2	1	3	1	1	1	5	4	6	6	4	3	4	5	5	6	5	5	4	3	5	5	7	3	4	3	2	6	5	5	4	6	4	5	4	3	3	4
1169	2026/4/7 17:26:39	235秒	微信	N/A	218.58.41.72(山东-济南)	224	1	3	2	1	3	1	1	1	1	1	3	7	7	7	7	7	7	7	7	7	7	7	7	7	7	7	7	7	7	7	7	7	7	7	7	7	7	7	7	7	7	7	7
1170	2026/4/7 17:27:21	60秒	微信	N/A	112.224.217.111(山东-济南)	195	2	2	2	1	2	3	2	1	1	1	1	7	7	7	7	6	7	7	6	6	6	6	6	6	6	4	5	6	6	6	6	6	6	6	6	6	6	6	6	6	6	6	6
1171	2026/4/7 17:27:38	48秒	微信	N/A	124.133.254.233(山东-济南)	128	1	1	5	1	4	2	1	1	1	1	1	4	4	4	4	4	4	4	4	4	4	4	4	4	4	4	4	4	4	4	4	4	4	4	4	4	4	4	4	4	4	4	4
1172	2026/4/7 17:28:34	877秒	微信	N/A	39.144.109.167(山东-聊城)	224	2	2	2	1	4	2	1	1	1	1	1	7	7	7	7	7	7	7	7	7	7	7	7	7	7	7	7	7	7	7	7	7	7	7	7	7	7	7	7	7	7	7	7
1173	2026/4/7 17:29:19	74秒	微信	N/A	112.224.190.150(山东-济南)	128	1	3	1	1	4	1	2	2	2	1	1	4	4	4	4	4	4	4	4	4	4	4	4	4	4	4	4	4	4	4	4	4	4	4	4	4	4	4	4	4	4	4	4
1174	2026/4/7 17:29:22	73秒	微信	N/A	39.144.109.153(山东-聊城)	192	2	1	3	1	4	2	2	1	1	1	1	6	6	6	6	6	6	6	6	6	6	6	6	6	6	6	6	6	6	6	6	6	6	6	6	6	6	6	6	6	6	6	6
1175	2026/4/7 17:30:22	82秒	微信	N/A	39.144.109.188(山东-聊城)	224	1	1	1	1	3	1	1	1	1	2	4	7	7	7	7	7	7	7	7	7	7	7	7	7	7	7	7	7	7	7	7	7	7	7	7	7	7	7	7	7	7	7	7
1176	2026/4/7 17:32:44	102秒	微信	N/A	112.224.217.50(山东-济南)	209	2	3	2	1	4	2	1	2	1	1	4	7	3	7	7	7	7	7	7	7	7	7	7	7	2	7	7	7	7	7	7	4	7	7	7	7	7	4	7	7	7	7	7
1177	2026/4/7 17:32:56	118秒	微信	N/A	112.224.141.180(山东-济南)	79	1	1	3	2	4	1	1	5	1	2	4	3	2	2	2	2	2	2	2	2	4	2	3	3	3	2	3	3	2	3	2	3	2	3	2	3	2	3	2	2	3	2	3
1178	2026/4/7 17:33:15	381秒	微信	N/A	39.144.109.164(山东-聊城)	82	2	1	3	1	4	1	1	3	2	3	4	2	2	2	2	3	3	2	2	2	2	2	3	2	2	2	3	6	3	3	3	2	2	3	2	3	3	3	3	2	3	3	2
1179	2026/4/7 17:33:39	85秒	微信	N/A	112.224.191.23(山东-济南)	124	1	1	1	1	1	3	3	5	2	1	1	3	3	3	3	4	4	4	4	4	4	4	4	4	4	4	4	4	4	4	4	4	4	4	4	4	4	4	4	4	4	4	4
1180	2026/4/7 17:33:49	80秒	微信	N/A	39.144.109.171(山东-聊城)	144	2	3	2	1	2	2	2	1	2	1	2	6	5	5	5	4	4	4	4	4	4	4	4	4	5	5	5	4	4	5	5	4	5	5	4	4	5	5	4	4	5	5	4
1181	2026/4/7 17:33:50	73秒	微信	N/A	39.144.109.141(山东-聊城)	173	2	3	2	1	4	1	1	3	1	2	1	5	6	6	6	6	6	6	6	6	6	6	6	6	6	6	5	5	5	5	5	5	5	5	5	5	5	4	5	5	5	5	5
1182	2026/4/7 17:33:50	770秒	微信	N/A	39.144.109.181(山东-聊城)	91	1	1	2	1	4	1	1	4	2	2	1	4	1	1	6	5	4	3	3	1	1	1	3	3	3	4	3	4	5	3	2	1	2	2	3	3	1	1	4	3	3	5	3
1183	2026/4/7 17:33:54	80秒	微信	N/A	39.144.109.146(山东-聊城)	224	2	3	2	1	4	3	1	3	1	2	2	7	7	7	7	7	7	7	7	7	7	7	7	7	7	7	7	7	7	7	7	7	7	7	7	7	7	7	7	7	7	7	7
1184	2026/4/7 17:34:11	102秒	微信	N/A	112.232.212.164(山东-济南)	160	2	3	2	1	4	2	1	1	1	1	1	5	5	5	5	4	4	4	4	4	4	4	4	5	5	5	5	5	5	5	5	5	5	5	5	6	6	6	6	6	6	6	6
1185	2026/4/7 17:34:13	82秒	微信	N/A	223.104.194.153(山东-济南)	160	2	2	2	1	3	1	1	3	2	1	1	5	5	5	5	5	5	5	5	5	5	5	5	5	5	5	5	5	5	5	5	5	5	5	5	5	5	5	5	5	5	5	5
1186	2026/4/7 17:34:14	101秒	微信	N/A	223.104.194.78(山东-济南)	224	1	3	2	1	4	2	2	1	1	2	1	7	7	7	7	7	7	7	7	7	7	7	7	7	7	7	7	7	7	7	7	7	7	7	7	7	7	7	7	7	7	7	7
1187	2026/4/7 17:34:28	75秒	微信	N/A	39.144.109.174(山东-聊城)	128	2	3	2	1	4	1	1	3	2	1	1	4	4	4	4	4	4	4	4	4	4	4	4	4	4	4	4	4	4	4	4	4	4	4	4	4	4	4	4	4	4	4	4
1188	2026/4/7 17:34:33	444秒	微信	N/A	112.224.217.135(山东-济南)	141	2	1	2	1	4	1	1	3	2	2	1	4	6	3	4	4	3	5	4	4	4	5	4	4	4	4	5	5	5	5	4	5	4	5	4	4	5	5	5	6	3	4	5
1189	2026/4/7 17:34:55	93秒	微信	N/A	39.144.109.141(山东-聊城)	181	2	2	1	1	4	2	2	2	2	1	4	7	7	7	7	5	5	6	5	6	5	6	5	6	5	6	5	6	5	6	5	6	5	6	5	6	5	6	5	6	5	6	5
1190	2026/4/7 17:35:14	128秒	微信	N/A	111.55.120.5(山东-济南)	224	2	3	2	1	2	2	2	3	2	1	4	7	7	7	7	7	7	7	7	7	7	7	7	7	7	7	7	7	7	7	7	7	7	7	7	7	7	7	7	7	7	7	7
1191	2026/4/7 17:35:22	177秒	微信	N/A	112.53.79.11(山东-济南)	128	2	3	2	1	2	2	2	2	2	2	2	4	4	4	4	4	4	4	4	4	4	4	4	4	4	4	4	4	4	4	4	4	4	4	4	4	4	4	4	4	4	4	4
1192	2026/4/7 17:35:35	171秒	微信	N/A	112.53.79.12(山东-济南)	69	2	3	2	1	4	1	1	3	2	1	1	1	1	1	1	2	1	1	1	4	2	1	3	2	3	3	3	3	3	3	2	2	2	2	2	3	2	2	2	3	3	3	2
1193	2026/4/7 17:35:50	91秒	微信	N/A	144.12.26.64(山东-淄博)	142	2	3	2	1	3	1	1	3	2	3	1	5	4	5	3	6	4	6	3	6	3	6	3	6	3	6	3	6	3	6	3	6	3	5	3	5	3	6	3	5	3	5	5
1194	2026/4/7 17:36:15	74秒	微信	N/A	112.224.225.116(山东-济南)	191	2	3	2	1	4	2	2	5	2	1	4	7	5	6	7	6	6	6	7	6	6	6	6	6	7	6	6	5	6	7	5	5	6	7	5	5	6	6	5	5	6	7	6
1195	2026/4/7 17:36:48	193秒	微信	N/A	39.144.109.167(山东-聊城)	72	2	3	2	1	2	2	1	1	1	1	1	3	1	4	7	2	2	2	3	4	2	2	2	2	2	2	4	4	2	1	1	1	1	4	2	1	1	1	1	2	2	2	2
1196	2026/4/7 17:37:02	120秒	微信	N/A	112.224.217.182(山东-济南)	75	1	3	2	1	3	2	2	3	1	2	1	1	1	4	2	1	1	1	1	4	4	4	1	1	1	1	1	1	1	1	1	1	4	4	4	4	4	1	4	4	4	4	4
1197	2026/4/7 17:37:12	182秒	微信	N/A	182.39.160.245(山东-枣庄)	164	2	3	2	1	4	1	1	1	2	1	1	6	4	6	6	6	6	6	6	6	6	4	4	6	4	4	4	6	4	5	5	5	5	5	5	5	5	5	5	5	5	5	5
1198	2026/4/7 17:37:16	246秒	微信	N/A	113.129.49.200(山东-济南)	142	2	3	2	1	2	1	1	1	1	2	2	5	4	4	6	4	5	4	4	4	5	4	6	5	4	4	4	5	5	4	3	3	4	6	4	4	3	4	5	5	5	5	5
1199	2026/4/7 17:37:26	293秒	微信	N/A	223.104.194.151(山东-济南)	132	2	3	2	1	4	1	1	1	2	2	1	4	3	4	6	3	3	4	4	5	4	3	4	4	4	3	5	6	6	6	4	3	4	5	4	3	3	3	4	5	4	5	4
1200	2026/4/7 17:37:28	73秒	微信	N/A	223.99.163.165(山东-济南)	149	2	2	5	1	4	1	1	2	2	2	1	5	4	5	6	4	5	5	7	5	4	5	5	5	4	5	4	4	4	5	3	5	4	5	4	5	6	5	4	4	5	4	4
1201	2026/4/7 17:37:37	53秒	微信	N/A	182.33.74.114(山东-济宁)	134	1	3	2	1	4	1	1	3	2	3	1	4	5	5	4	4	4	5	4	3	3	4	4	5	4	5	4	5	4	4	5	4	4	4	5	4	4	3	5	5	4	4	3
1202	2026/4/7 17:37:46	87秒	微信	N/A	223.104.194.154(山东-济南)	148	2	3	2	1	3	1	1	2	1	1	4	4	4	4	4	3	3	3	3	5	5	5	5	5	5	5	5	5	5	5	5	5	5	5	5	5	5	5	5	5	5	5	5
1203	2026/4/7 17:37:48	192秒	微信	N/A	39.144.109.145(山东-聊城)	167	2	3	2	1	3	2	1	2	2	2	1	5	5	6	6	5	5	6	6	5	4	5	6	4	5	4	6	6	5	6	5	4	5	6	4	6	5	6	5	6	5	5	5
1204	2026/4/7 17:39:17	263秒	微信	N/A	39.144.109.150(山东-聊城)	137	2	3	2	1	4	1	1	1	1	2	4	4	4	4	4	4	4	4	4	4	4	4	4	4	4	4	4	7	6	6	6	4	4	4	4	4	4	4	4	4	4	4	4
1205	2026/4/7 17:39:32	66秒	微信	N/A	39.144.109.167(山东-聊城)	120	2	3	2	1	2	3	3	2	2	2	1	4	4	4	4	3	4	4	3	3	5	3	4	4	3	4	3	3	4	4	4	5	4	3	4	3	4	3	4	5	3	4	4
1206	2026/4/7 17:40:04	60秒	微信	N/A	112.224.225.60(山东-济南)	159	1	1	3	1	4	2	2	2	2	2	2	5	5	5	5	5	5	6	3	4	5	4	5	5	4	5	5	5	4	5	5	5	4	5	5	5	5	6	6	6	5	6	6
1207	2026/4/7 17:40:44	235秒	微信	N/A	112.224.162.168(山东-济南)	146	1	3	2	1	2	3	3	5	2	3	4	4	2	7	7	6	6	6	6	7	7	1	7	7	7	7	7	5	7	1	1	5	5	1	1	1	1	1	5	3	5	5	5
1208	2026/4/7 17:40:56	52秒	微信	N/A	39.144.109.140(山东-聊城)	118	2	3	2	1	1	1	2	1	2	2	1	5	3	4	4	4	4	3	3	3	3	3	3	5	3	4	4	4	3	4	4	4	3	4	4	4	3	4	4	4	3	4	4
1209	2026/4/7 17:42:25	217秒	微信	N/A	112.53.79.14(山东-济南)	193	2	2	1	1	4	2	1	1	2	1	4	7	7	7	7	4	7	7	7	5	5	5	5	6	6	6	6	6	6	6	6	6	6	6	6	6	6	6	6	6	6	6	6
1210	2026/4/7 17:42:44	49秒	微信	N/A	39.144.109.183(山东-聊城)	132	2	3	2	1	2	1	1	3	2	3	1	5	5	5	5	4	4	4	4	4	4	4	4	4	4	4	4	4	4	4	4	4	4	4	4	4	4	4	4	4	4	4	4
1211	2026/4/7 17:43:00	57秒	微信	N/A	39.144.109.139(山东-聊城)	192	2	3	2	1	1	1	1	1	1	3	1	6	6	6	6	6	6	6	6	6	6	6	6	6	6	6	6	6	6	6	6	6	6	6	6	6	6	6	6	6	6	6	6
1212	2026/4/7 17:43:06	63秒	微信	N/A	112.224.29.70(山东-济南)	168	2	3	2	1	4	1	1	3	2	2	1	6	6	6	6	6	5	5	5	5	5	5	5	5	5	5	5	5	5	5	5	5	6	5	5	6	5	5	5	5	5	5	6
1213	2026/4/7 17:45:16	79秒	微信	N/A	39.144.108.174(山东-东营)	223	1	4	2	2	3	2	2	5	1	2	3	7	7	7	7	7	7	7	7	7	7	7	7	7	7	7	7	7	7	7	7	7	7	7	7	7	7	6	7	7	7	7	7
1214	2026/4/7 17:45:36	84秒	微信	N/A	112.53.79.14(山东-济南)	129	1	4	2	2	4	1	1	2	1	1	1	4	4	4	4	4	4	4	4	4	4	4	4	4	3	5	5	5	4	3	3	3	5	4	5	4	4	4	4	4	4	4	4
1215	2026/4/7 17:46:01	83秒	微信	N/A	223.99.163.164(山东-济南)	128	1	3	2	1	4	1	1	5	1	3	1	4	4	4	4	4	4	4	4	4	4	4	4	4	4	4	4	4	4	4	4	4	4	4	4	4	4	4	4	4	4	4	4
1216	2026/4/7 17:46:02	64秒	微信	N/A	112.224.220.117(山东-济南)	224	1	3	2	1	4	1	1	2	1	1	1	7	7	7	7	7	7	7	7	7	7	7	7	7	7	7	7	7	7	7	7	7	7	7	7	7	7	7	7	7	7	7	7
1217	2026/4/7 17:46:46	144秒	微信	N/A	223.99.163.164(山东-济南)	127	1	3	2	2	4	2	1	5	2	2	1	4	3	4	5	3	4	4	4	4	4	4	4	4	4	4	4	4	4	4	4	4	4	4	4	4	4	4	4	4	4	4	4
1218	2026/4/7 17:46:50	103秒	微信	N/A	39.144.109.131(山东-聊城)	224	2	3	2	1	2	1	1	3	2	3	1	7	7	7	7	7	7	7	7	7	7	7	7	7	7	7	7	7	7	7	7	7	7	7	7	7	7	7	7	7	7	7	7
1219	2026/4/7 17:47:13	76秒	微信	N/A	112.53.79.14(山东-济南)	224	2	1	3	1	3	1	1	4	2	2	1	7	7	7	7	7	7	7	7	7	7	7	7	7	7	7	7	7	7	7	7	7	7	7	7	7	7	7	7	7	7	7	7
1220	2026/4/7 17:47:28	147秒	微信	N/A	112.53.79.12(山东-济南)	158	2	4	2	2	4	1	1	3	2	2	3	6	5	4	5	5	3	5	5	5	3	5	5	5	4	5	6	5	4	5	5	6	4	5	5	5	6	6	7	5	5	5	4
1221	2026/4/7 17:48:34	291秒	微信	N/A	112.224.219.90(山东-济南)	160	2	2	1	1	4	1	1	2	2	3	4	5	5	5	5	5	5	5	5	5	5	5	5	5	5	5	5	5	5	5	5	5	5	5	5	5	5	5	5	5	5	5	5
1222	2026/4/7 17:48:34	76秒	微信	N/A	39.144.109.119(山东-聊城)	162	1	3	2	1	4	1	1	3	2	2	1	4	5	5	4	5	5	4	5	6	7	6	6	5	6	5	5	6	5	6	4	5	5	5	5	4	4	4	5	5	4	6	6
1223	2026/4/7 17:49:14	390秒	微信	N/A	39.144.109.155(山东-聊城)	152	2	2	1	1	3	1	1	1	2	1	1	6	5	5	5	5	4	4	5	5	5	5	5	5	4	5	5	5	5	5	5	4	4	4	4	5	4	5	4	5	5	5	5
1224	2026/4/7 17:50:09	331秒	微信	N/A	144.12.79.36(山东-日照)	91	2	4	2	2	4	2	1	1	2	2	2	2	5	3	7	3	2	2	2	3	2	2	3	6	4	3	4	3	2	2	2	2	2	3	4	1	2	1	5	2	2	3	2
1225	2026/4/7 17:50:31	55秒	微信	N/A	39.144.109.139(山东-聊城)	149	2	3	2	1	4	1	1	2	2	2	1	5	5	5	4	5	5	5	5	4	5	3	5	5	3	5	5	5	4	4	5	5	4	5	5	5	5	4	5	6	4	4	5
1226	2026/4/7 17:50:58	67秒	微信	N/A	112.224.143.98(山东-济南)	146	2	2	1	2	2	2	2	2	2	2	2	7	5	5	5	3	3	3	4	3	4	4	4	4	4	4	4	5	5	5	5	5	5	5	5	5	5	5	5	5	5	5	5
1227	2026/4/7 17:52:38	67秒	微信	N/A	112.224.217.131(山东-济南)	110	1	1	5	1	4	1	1	4	2	2	2	2	3	2	3	4	3	3	4	3	4	3	4	4	4	4	4	2	4	3	3	5	4	3	3	4	3	4	3	4	3	4	4
1228	2026/4/7 17:52:44	92秒	微信	N/A	223.99.163.164(山东-济南)	184	1	4	2	2	2	1	2	3	1	2	3	7	5	6	7	5	4	7	5	5	5	5	5	5	5	5	5	5	5	6	6	4	6	4	6	7	7	7	7	7	7	7	7
1229	2026/4/7 17:52:46	94秒	微信	N/A	112.224.224.183(山东-济南)	224	1	3	1	1	4	1	1	1	1	1	4	7	7	7	7	7	7	7	7	7	7	7	7	7	7	7	7	7	7	7	7	7	7	7	7	7	7	7	7	7	7	7	7
1230	2026/4/7 17:53:01	53秒	微信	N/A	39.82.244.180(山东-济南)	128	1	3	1	1	4	2	2	3	2	3	1	4	4	4	4	4	4	4	4	4	4	4	4	4	4	4	4	4	4	4	4	4	4	4	4	4	4	4	4	4	4	4	4
1231	2026/4/7 17:53:07	92秒	微信	N/A	112.53.79.11(山东-济南)	224	1	3	2	2	4	1	1	5	1	3	1	7	7	7	7	7	7	7	7	7	7	7	7	7	7	7	7	7	7	7	7	7	7	7	7	7	7	7	7	7	7	7	7
1232	2026/4/7 17:53:10	47秒	微信	N/A	39.144.109.166(山东-聊城)	133	2	4	2	2	2	2	1	2	2	2	2	4	4	4	4	4	4	5	4	3	4	5	4	4	5	4	3	4	5	4	4	4	5	4	4	4	3	5	5	4	5	4	4
1233	2026/4/7 17:53:47	59秒	微信	N/A	112.224.190.116(山东-济南)	224	2	1	1	1	3	1	1	1	2	1	2	7	7	7	7	7	7	7	7	7	7	7	7	7	7	7	7	7	7	7	7	7	7	7	7	7	7	7	7	7	7	7	7
1234	2026/4/7 17:54:12	134秒	微信	N/A	112.224.172.223(山东-烟台)	128	1	3	1	1	2	3	1	1	1	2	1	4	4	4	4	4	4	4	4	4	4	4	4	4	4	4	4	4	4	4	4	4	4	4	4	4	4	4	4	4	4	4	4
1235	2026/4/7 17:54:42	84秒	微信	N/A	112.224.224.198(山东-济南)	143	1	3	1	1	4	1	1	2	2	2	4	4	4	4	4	5	4	5	4	5	4	5	4	5	4	5	4	4	5	5	4	5	4	5	5	4	5	5	4	4	5	5	4
1236	2026/4/7 17:55:03	202秒	微信	N/A	112.228.14.221(山东-临沂)	80	2	4	2	2	3	1	1	4	2	2	2	3	2	5	4	2	2	1	3	3	2	3	3	2	1	2	3	6	2	4	2	1	5	1	5	1	2	2	2	2	1	2	1
1237	2026/4/7 17:55:08	103秒	微信	N/A	223.104.194.174(山东-济南)	106	2	4	2	2	4	1	1	3	2	1	1	6	2	6	2	2	2	2	2	6	6	6	2	4	4	4	4	4	4	4	4	2	6	2	4	2	2	2	2	2	2	2	2
1238	2026/4/7 17:55:15	116秒	微信	N/A	223.160.164.14(山东-济南)	192	2	1	5	1	4	1	1	1	1	2	2	6	6	6	6	6	6	6	6	6	6	6	6	6	6	6	6	6	6	6	6	6	6	6	6	6	6	6	6	6	6	6	6
1239	2026/4/7 17:55:48	192秒	微信	N/A	182.39.21.178(山东-济南)	157	1	3	1	1	4	1	1	4	2	1	1	4	6	5	5	4	4	4	4	5	5	6	5	5	5	6	4	5	5	4	5	4	5	5	5	5	6	5	6	5	5	5	5
1240	2026/4/7 17:56:22	154秒	微信	N/A	223.104.194.136(山东-济南)	199	1	1	5	1	4	1	1	1	1	2	4	7	7	7	7	7	7	7	6	6	6	6	6	6	6	6	6	6	6	6	6	6	6	6	6	6	6	6	6	6	6	6	6
1241	2026/4/7 17:57:04	111秒	微信	N/A	112.224.176.198(山东-济南)	150	1	3	1	1	2	2	3	3	2	2	1	5	5	5	3	5	5	5	5	5	5	5	5	5	5	5	5	5	5	5	5	5	5	5	5	4	4	4	4	4	4	4	4
1242	2026/4/7 17:57:30	81秒	微信	N/A	182.39.21.178(山东-济南)	163	1	3	1	1	4	1	1	4	2	1	1	5	4	5	6	5	4	5	6	6	5	6	4	5	6	5	5	5	4	5	6	5	4	5	5	5	6	5	6	5	5	6	4
1243	2026/4/7 17:57:32	233秒	微信	N/A	112.224.163.142(山东-济南)	143	1	3	1	1	4	2	1	1	2	2	4	5	5	4	4	5	4	5	5	5	4	5	4	4	4	4	4	5	5	4	5	5	5	4	5	5	4	4	4	4	4	5	4
1244	2026/4/7 17:57:46	257秒	微信	N/A	223.104.194.179(山东-济南)	224	2	3	2	1	2	3	3	2	2	1	1	7	7	7	7	7	7	7	7	7	7	7	7	7	7	7	7	7	7	7	7	7	7	7	7	7	7	7	7	7	7	7	7
1245	2026/4/7 17:57:50	105秒	微信	N/A	223.104.194.130(山东-济南)	222	2	1	5	1	2	2	1	5	2	1	1	7	5	7	7	7	7	7	7	7	7	7	7	7	7	7	7	7	7	7	7	7	7	7	7	7	7	7	7	7	7	7	7
1246	2026/4/7 17:58:10	63秒	微信	N/A	223.104.194.140(山东-济南)	192	2	1	3	1	3	2	2	4	1	1	1	6	6	6	6	6	6	6	6	6	6	6	6	6	6	6	6	6	6	6	6	6	6	6	6	6	6	6	6	6	6	6	6
1247	2026/4/7 17:58:35	83秒	微信	N/A	39.144.109.146(山东-聊城)	128	2	4	2	2	2	1	2	3	1	1	1	4	4	4	4	4	4	4	4	4	4	4	4	4	4	4	4	4	4	4	4	4	4	4	4	4	4	4	4	4	4	4	4
1248	2026/4/7 17:59:09	51秒	微信	N/A	223.99.163.164(山东-济南)	128	1	1	1	1	4	1	1	3	2	3	4	4	4	4	4	4	4	4	4	4	4	4	4	4	4	4	4	4	4	4	4	4	4	4	4	4	4	4	4	4	4	4	4
1249	2026/4/7 17:59:35	124秒	微信	N/A	223.99.163.165(山东-济南)	211	1	1	1	1	4	1	1	3	2	1	1	7	7	7	7	5	7	7	7	7	7	7	7	7	7	7	4	7	5	7	4	7	7	7	7	7	7	7	7	7	7	7	4
1250	2026/4/7 18:01:15	69秒	微信	N/A	112.224.163.105(山东-济南)	128	1	3	1	1	4	1	1	3	2	1	4	4	4	4	4	4	4	4	4	4	4	4	4	4	4	4	4	4	4	4	4	4	4	4	4	4	4	4	4	4	4	4	4
1251	2026/4/7 18:02:30	63秒	微信	N/A	112.8.48.101(山东-临沂)	129	2	1	5	1	2	3	3	2	2	1	1	2	2	2	2	3	4	3	3	2	2	2	2	3	3	3	3	4	4	4	4	6	6	6	6	6	6	6	6	6	6	6	6
1252	2026/4/7 18:03:02	55秒	微信	N/A	218.58.41.247(山东-济南)	143	1	3	1	1	3	2	3	2	2	2	4	4	4	4	3	4	4	4	4	4	4	4	4	4	4	4	4	5	5	5	5	5	5	5	5	5	5	5	5	5	5	5	5
1253	2026/4/7 18:03:25	113秒	微信	N/A	140.75.101.125(山东-青岛)	155	2	2	2	1	4	2	2	1	2	2	1	6	5	6	6	3	4	4	4	5	5	6	4	6	5	4	4	6	4	4	4	5	5	5	5	6	4	5	6	5	5	4	5
1254	2026/4/7 18:03:47	124秒	微信	N/A	144.12.245.30(山东-济南)	129	2	3	2	1	4	1	1	1	1	2	1	4	4	4	4	4	4	4	4	4	4	4	4	4	4	4	4	5	4	4	4	4	4	4	4	4	4	4	4	4	4	4	4
1255	2026/4/7 18:04:54	1852秒	微信	N/A	140.75.104.136(山东-青岛)	155	1	3	2	1	2	2	1	4	1	3	1	5	2	5	5	5	5	5	5	5	5	5	5	4	6	4	6	5	6	6	6	6	5	6	5	3	2	1	3	6	6	6	6
1256	2026/4/7 18:05:31	177秒	微信	N/A	39.144.109.134(山东-聊城)	101	2	1	2	2	4	1	1	3	2	2	1	2	2	3	4	3	3	3	3	4	4	4	4	3	3	3	3	4	2	3	3	3	4	3	3	3	3	3	3	3	3	4	3
1257	2026/4/7 18:07:34	42秒	微信	N/A	182.33.135.93(山东-潍坊)	160	1	3	4	2	2	2	3	2	1	2	3	5	5	5	5	5	5	5	5	5	5	5	5	5	5	5	5	5	5	5	5	5	5	5	5	5	5	5	5	5	5	5	5
1258	2026/4/7 18:07:50	93秒	微信	N/A	39.144.109.132(山东-聊城)	135	2	3	2	2	4	2	1	1	2	2	1	4	4	4	5	4	4	4	5	4	4	4	3	4	4	4	5	4	5	4	4	4	5	4	5	5	4	5	4	4	4	4	4
1259	2026/4/7 18:09:18	295秒	微信	N/A	112.224.223.72(山东-济南)	68	2	1	2	1	4	2	1	3	2	2	1	2	2	3	3	3	2	2	3	2	2	2	2	2	2	2	2	6	2	2	2	1	2	1	1	2	2	1	2	2	2	2	2
1260	2026/4/7 18:09:49	504秒	微信	N/A	223.99.163.166(山东-济南)	126	2	1	1	1	3	1	1	3	2	3	1	4	4	4	4	4	5	5	4	3	3	3	3	4	4	4	4	5	4	3	3	3	5	3	3	5	5	5	6	3	4	4	3
1261	2026/4/7 18:10:09	248秒	微信	N/A	223.104.194.148(山东-济南)	176	2	1	2	1	2	2	2	1	1	1	3	6	6	5	5	5	5	5	5	5	5	5	5	5	5	5	5	6	6	6	6	4	6	6	6	6	6	6	6	6	6	6	6
1262	2026/4/7 18:10:33	232秒	微信	N/A	112.224.143.222(山东-济南)	128	2	3	2	1	4	3	3	3	2	1	1	4	4	4	4	4	4	4	4	4	4	4	4	4	4	4	4	4	4	4	4	4	4	4	4	4	4	4	4	4	4	4	4
1263	2026/4/7 18:10:43	109秒	微信	N/A	223.99.163.166(山东-济南)	152	1	2	2	1	2	1	1	5	2	2	1	5	5	5	5	5	5	5	5	5	5	5	5	5	5	5	5	5	5	5	5	3	3	3	3	5	5	5	5	5	5	5	5
1264	2026/4/7 18:12:16	154秒	微信	N/A	112.53.79.14(山东-济南)	224	1	1	5	1	2	2	2	4	2	1	1	7	7	7	7	7	7	7	7	7	7	7	7	7	7	7	7	7	7	7	7	7	7	7	7	7	7	7	7	7	7	7	7
1265	2026/4/7 18:12:18	86秒	微信	N/A	218.58.41.204(山东-济南)	176	2	1	5	1	3	3	3	1	2	1	4	6	6	6	6	6	6	5	5	5	5	5	6	6	5	5	5	6	6	5	5	5	5	6	6	5	5	5	5	6	6	6	6
1266	2026/4/7 18:12:38	367秒	微信	N/A	112.224.227.87(山东-济南)	133	2	3	2	1	4	2	2	1	2	1	1	4	4	4	4	4	4	4	4	4	4	4	4	5	2	3	2	7	2	5	2	4	4	4	4	4	4	4	4	7	6	6	6
1267	2026/4/7 18:13:55	73秒	微信	N/A	112.224.227.128(山东-济南)	32	1	3	1	1	2	2	2	2	2	3	1	1	1	1	1	1	1	1	1	1	1	1	1	1	1	1	1	1	1	1	1	1	1	1	1	1	1	1	1	1	1	1	1
1268	2026/4/7 18:14:43	108秒	微信	N/A	218.58.41.74(山东-济南)	128	1	3	1	1	2	1	1	3	1	2	1	4	4	4	4	4	4	4	4	4	4	4	4	4	4	4	4	4	4	4	4	4	4	4	4	4	4	4	4	4	4	4	4
1269	2026/4/7 18:14:48	140秒	微信	N/A	223.104.194.162(山东-济南)	174	1	3	2	1	2	1	1	3	2	1	2	5	6	5	6	6	5	6	6	6	5	6	6	5	4	4	6	6	5	5	4	6	4	6	5	6	5	6	6	6	6	5	6
1270	2026/4/7 18:15:03	75秒	微信	N/A	144.12.53.201(山东-淄博)	224	1	1	1	1	3	2	2	3	2	2	1	7	7	7	7	7	7	7	7	7	7	7	7	7	7	7	7	7	7	7	7	7	7	7	7	7	7	7	7	7	7	7	7
1271	2026/4/7 18:15:41	44秒	微信	N/A	223.104.194.165(山东-济南)	129	1	1	2	1	4	4	3	3	1	1	1	5	4	4	4	4	4	4	4	4	4	4	4	4	4	4	4	4	4	4	4	4	4	4	4	4	4	4	4	4	4	4	4
1272	2026/4/7 18:17:05	44秒	微信	N/A	112.53.79.12(山东-济南)	128	1	1	1	1	1	3	3	3	1	3	4	4	4	4	4	4	4	4	4	4	4	4	4	4	4	4	4	4	4	4	4	4	4	4	4	4	4	4	4	4	4	4	4
1273	2026/4/7 18:18:14	204秒	微信	N/A	39.144.109.142(山东-聊城)	169	2	3	2	1	4	1	1	1	2	1	1	7	4	6	6	7	7	4	7	7	7	7	7	5	4	4	7	6	7	5	4	4	6	2	4	4	5	5	5	4	4	4	4
1274	2026/4/7 18:19:46	92秒	微信	N/A	112.232.212.66(山东-济南)	135	2	1	5	2	3	2	2	4	2	2	1	6	4	4	4	4	5	5	5	4	5	5	4	4	4	4	4	4	4	4	4	4	4	4	4	4	4	4	4	4	4	4	4
1275	2026/4/7 18:19:54	63秒	微信	N/A	223.104.194.184(山东-济南)	138	2	1	1	1	3	2	3	2	2	2	2	5	4	5	4	4	5	5	4	5	4	4	5	4	6	5	3	5	4	4	3	5	4	4	4	4	4	4	5	5	4	4	3
1276	2026/4/7 18:20:04	101秒	微信	N/A	112.224.160.4(山东-济南)	133	2	1	5	2	4	1	1	3	1	1	1	3	5	4	5	4	5	4	4	4	5	4	5	4	5	4	5	3	5	5	4	3	5	4	3	3	4	5	3	3	4	5	4
1277	2026/4/7 18:20:37	100秒	微信	N/A	223.104.194.128(山东-济南)	158	2	1	5	1	2	1	1	1	1	2	1	4	5	5	5	4	5	5	5	5	5	5	5	5	5	5	5	5	5	5	5	5	5	5	5	5	5	5	5	5	5	5	5
1278	2026/4/7 18:20:43	70秒	微信	N/A	112.224.143.51(山东-济南)	182	2	1	5	1	3	2	2	2	2	1	4	7	7	7	7	7	7	6	6	6	6	5	6	6	6	6	5	6	5	7	6	4	5	4	5	5	5	4	4	5	6	6	5
1279	2026/4/7 18:21:08	41秒	微信	N/A	112.224.217.153(山东-济南)	210	1	2	1	1	2	1	2	1	2	1	1	7	7	7	7	7	7	7	7	7	7	7	7	6	6	6	7	6	6	6	6	6	7	6	6	7	7	7	6	6	6	6	7
1280	2026/4/7 18:22:46	98秒	微信	N/A	123.233.72.199(山东-济南)	160	1	1	3	1	4	2	1	4	2	1	1	5	5	5	5	5	5	5	5	5	5	5	5	5	5	5	5	5	5	5	5	5	5	5	5	5	5	5	5	5	5	5	5
1281	2026/4/7 18:23:20	103秒	微信	N/A	223.99.163.165(山东-济南)	130	2	1	1	1	3	2	1	2	1	2	1	5	5	5	5	3	4	5	3	3	4	4	4	4	4	4	4	4	4	4	4	4	4	4	4	4	4	4	4	4	4	4	4
1282	2026/4/7 18:23:22	91秒	微信	N/A	39.144.109.137(山东-聊城)	96	2	1	1	1	3	1	1	3	1	2	4	3	3	3	3	3	3	3	3	3	3	3	3	3	3	3	3	3	3	3	3	3	3	3	3	3	3	3	3	3	3	3	3
1283	2026/4/7 18:23:29	286秒	微信	N/A	223.104.194.134(山东-济南)	147	2	1	5	1	4	2	1	1	2	2	4	5	4	5	4	5	4	4	4	5	5	4	5	5	5	5	4	4	4	5	4	3	5	5	5	5	5	4	6	5	5	5	4
1284	2026/4/7 18:23:32	121秒	微信	N/A	223.104.194.133(山东-济南)	128	2	1	1	1	2	1	1	2	2	3	1	5	4	4	4	4	4	4	4	4	4	4	4	7	7	3	7	5	2	2	1	1	5	4	4	4	5	4	5	2	4	4	3
1285	2026/4/7 18:24:24	114秒	微信	N/A	39.144.109.152(山东-聊城)	151	2	1	3	1	2	3	2	2	1	3	4	3	3	4	4	3	4	4	4	4	4	4	4	5	5	5	5	6	6	7	7	4	4	4	5	5	5	6	5	6	5	5	6
1286	2026/4/7 18:24:47	84秒	微信	N/A	112.224.226.172(山东-济南)	128	2	1	3	1	2	2	3	4	2	1	1	4	4	4	4	4	4	4	4	4	4	4	4	4	4	4	4	4	4	4	4	4	4	4	4	4	4	4	4	4	4	4	4
1287	2026/4/7 18:28:02	82秒	微信	N/A	223.104.194.131(山东-济南)	144	2	1	5	1	3	1	1	3	2	2	1	4	4	4	4	3	5	5	5	6	6	5	5	4	5	5	4	4	5	4	4	4	4	4	5	5	4	4	5	5	4	4	5
1288	2026/4/7 18:28:07	56秒	微信	N/A	218.58.41.208(山东-济南)	224	1	1	1	1	2	1	1	5	1	1	4	7	7	7	7	7	7	7	7	7	7	7	7	7	7	7	7	7	7	7	7	7	7	7	7	7	7	7	7	7	7	7	7
1289	2026/4/7 18:28:37	81秒	微信	N/A	223.99.163.164(山东-济南)	110	2	2	5	1	4	1	1	2	2	2	1	4	4	4	4	3	3	3	3	3	3	3	3	2	3	3	4	3	3	4	3	4	5	3	4	3	4	4	4	3	4	3	4
1290	2026/4/7 18:29:26	93秒	微信	N/A	223.104.194.168(山东-济南)	129	1	1	1	1	4	1	1	4	2	2	1	4	3	4	4	4	5	4	4	4	4	4	4	4	3	5	4	4	4	3	4	4	4	4	5	4	4	4	5	4	4	4	4
1291	2026/4/7 18:30:04	58秒	微信	N/A	223.104.194.180(山东-济南)	218	2	1	5	1	4	2	2	1	2	1	1	7	7	7	7	7	7	7	7	7	7	7	7	7	7	6	6	6	6	7	7	7	7	7	7	7	7	7	7	7	6	6	7
1292	2026/4/7 18:30:20	153秒	微信	N/A	112.224.226.208(山东-济南)	94	1	1	1	1	2	3	2	5	1	2	1	7	1	7	7	5	5	5	4	1	1	1	1	1	1	1	1	1	1	1	1	1	1	1	5	1	3	3	1	6	6	6	7
1293	2026/4/7 18:30:56	192秒	微信	N/A	223.104.194.150(山东-济南)	151	1	1	1	2	4	1	1	3	2	3	1	5	2	7	5	4	4	4	4	3	4	4	5	5	5	4	5	5	2	7	5	4	4	4	4	7	7	5	5	6	5	5	6
1294	2026/4/7 18:30:59	153秒	微信	N/A	112.53.79.13(山东-济南)	125	1	1	1	1	4	2	2	3	2	1	4	7	1	5	7	2	2	2	4	4	4	4	4	4	4	4	4	4	3	4	4	4	4	4	4	4	4	4	4	4	4	4	4
1295	2026/4/7 18:31:01	98秒	微信	N/A	112.224.163.122(山东-济南)	178	1	1	1	1	4	1	1	2	2	3	4	4	1	6	7	6	5	5	5	6	4	7	7	6	6	4	6	4	7	6	4	7	7	5	5	5	7	7	5	7	5	7	5
1296	2026/4/7 18:31:43	63秒	微信	N/A	223.104.194.187(山东-济南)	133	1	1	1	1	2	4	2	2	2	2	2	6	6	2	2	2	5	5	6	6	6	6	7	2	5	2	5	2	5	2	5	2	6	2	6	2	2	5	6	2	5	6	2
1297	2026/4/7 18:32:03	97秒	微信	N/A	223.160.164.54(山东-济南)	192	1	1	1	1	1	2	2	1	2	1	1	6	6	6	6	6	6	6	6	6	6	6	6	6	6	6	6	6	6	6	6	6	6	6	6	6	6	6	6	6	6	6	6
1298	2026/4/7 18:32:26	100秒	微信	N/A	144.12.215.171(山东-滨州)	128	1	1	1	1	4	1	1	1	1	1	1	4	4	4	4	4	4	4	4	4	4	4	4	4	4	4	4	4	4	4	4	4	4	4	4	4	4	4	4	4	4	4	4
1299	2026/4/7 18:32:51	61秒	微信	N/A	223.104.194.139(山东-济南)	63	1	1	1	1	4	1	1	2	2	3	1	2	2	2	2	2	3	2	3	2	1	2	3	2	1	2	2	2	3	2	1	2	1	2	2	2	2	2	2	3	1	2	1
1300	2026/4/7 18:32:53	68秒	微信	N/A	112.36.69.217(山东-济宁)	128	2	4	2	1	2	2	2	4	1	2	3	4	4	4	4	4	4	4	4	4	4	4	4	4	4	4	4	4	4	4	4	4	4	4	4	4	4	4	4	4	4	4	4
1301	2026/4/7 18:33:06	124秒	微信	N/A	140.75.102.71(山东-青岛)	141	1	1	1	1	4	1	1	2	1	3	1	5	5	5	5	5	5	5	5	5	5	5	5	4	3	5	5	4	5	3	4	5	4	4	4	4	4	4	4	4	4	3	4
1302	2026/4/7 18:33:15	86秒	微信	N/A	182.33.40.127(山东-济宁)	128	1	1	1	1	4	1	2	4	2	3	4	4	4	4	4	4	4	4	4	4	4	4	4	4	4	4	4	4	4	4	4	4	4	4	4	4	4	4	4	4	4	4	4
1303	2026/4/7 18:33:44	72秒	微信	N/A	223.160.160.191(山东-济南)	154	1	1	1	1	4	3	3	4	2	2	3	5	5	5	5	5	5	5	5	5	5	5	5	5	5	5	5	5	5	5	5	5	4	5	4	5	4	5	4	5	4	5	4
1304	2026/4/7 18:35:05	91秒	微信	N/A	223.104.194.167(山东-济南)	160	1	1	1	1	4	1	1	3	2	1	4	5	5	5	5	5	5	5	5	5	5	5	5	5	5	5	5	5	5	5	5	5	5	5	5	5	5	5	5	5	5	5	5
1305	2026/4/7 18:35:08	103秒	微信	N/A	182.33.227.138(山东-潍坊)	128	1	3	2	1	1	2	1	3	1	1	1	4	4	4	4	4	4	4	4	4	4	4	4	4	4	4	4	4	4	4	4	4	4	4	4	4	4	4	4	4	4	4	4
1306	2026/4/7 18:35:33	61秒	微信	N/A	223.104.194.174(山东-济南)	128	1	1	2	1	4	2	2	4	2	2	1	4	4	4	4	4	4	4	4	4	4	4	4	4	4	4	4	4	4	4	4	4	4	4	4	4	4	4	4	4	4	4	4
1307	2026/4/7 18:35:40	59秒	微信	N/A	144.12.255.231(山东-滨州)	224	1	1	1	1	2	4	4	1	1	1	3	7	7	7	7	7	7	7	7	7	7	7	7	7	7	7	7	7	7	7	7	7	7	7	7	7	7	7	7	7	7	7	7
1308	2026/4/7 18:35:55	145秒	微信	N/A	112.224.223.141(山东-济南)	182	2	2	5	1	4	1	1	3	2	1	1	6	6	7	7	6	6	7	5	5	6	6	6	6	6	4	5	7	5	5	6	5	4	4	6	6	6	6	6	6	5	6	5
1309	2026/4/7 18:36:30	301秒	微信	N/A	112.224.221.39(山东-济南)	160	1	1	1	1	2	3	2	3	2	1	1	5	5	5	5	5	5	5	5	5	5	5	5	5	5	5	5	5	5	5	5	5	5	5	5	5	5	5	5	5	5	5	5
1310	2026/4/7 18:36:31	76秒	微信	N/A	223.104.195.75(山东-泰安)	128	2	1	2	1	3	2	2	1	2	2	1	4	4	4	4	4	4	4	4	4	4	4	4	4	4	4	4	4	4	4	4	4	4	4	4	4	4	4	4	4	4	4	4
1311	2026/4/7 18:36:32	45秒	微信	N/A	182.33.217.121(山东-潍坊)	160	1	1	2	1	2	3	3	5	2	2	1	3	3	3	3	3	3	3	3	5	5	5	5	5	5	5	5	5	6	4	6	6	4	6	7	7	7	7	6	6	7	6	6
1312	2026/4/7 18:36:34	149秒	微信	N/A	39.144.109.184(山东-聊城)	68	1	1	1	1	3	1	1	3	2	3	4	5	1	2	4	2	2	2	2	2	2	2	2	2	2	2	2	2	2	2	2	2	2	2	2	2	2	2	2	2	2	2	2
1313	2026/4/7 18:36:37	90秒	微信	N/A	112.224.191.175(山东-济南)	64	2	1	5	1	2	3	3	3	2	2	1	2	2	2	2	2	2	2	2	2	2	2	2	2	2	2	2	2	2	2	2	2	2	2	2	2	2	2	2	2	2	2	2
1314	2026/4/7 18:36:37	68秒	微信	N/A	39.144.109.131(山东-聊城)	124	1	1	2	2	4	2	2	5	2	3	1	4	4	4	4	4	4	4	4	4	4	4	4	4	4	4	4	4	4	4	4	3	4	3	5	4	2	4	5	3	3	4	4
1315	2026/4/7 18:36:42	92秒	微信	N/A	220.197.5.138(贵州-贵阳)	158	2	1	2	1	2	2	2	2	2	2	1	5	4	5	5	5	5	4	5	4	5	5	4	5	4	5	5	5	4	5	5	4	5	5	5	6	5	6	5	6	5	6	6
1316	2026/4/7 18:37:00	118秒	微信	N/A	223.104.194.147(山东-济南)	128	2	1	2	1	3	1	2	4	2	2	1	4	4	4	4	4	4	4	4	4	4	4	4	4	4	4	4	4	4	4	4	4	4	4	4	4	4	4	4	4	4	4	4
1317	2026/4/7 18:37:00	117秒	微信	N/A	112.224.219.158(山东-济南)	77	2	1	2	1	4	1	1	2	2	2	1	2	3	2	2	2	2	2	3	3	2	3	2	3	3	2	3	3	2	3	2	2	3	2	3	2	3	2	2	2	2	3	2
1318	2026/4/7 18:37:10	132秒	微信	N/A	123.233.72.235(山东-济南)	144	2	1	2	1	4	1	1	2	2	3	1	7	3	6	5	2	2	4	4	7	3	6	4	6	4	3	4	6	2	4	4	4	7	5	6	5	5	4	5	4	4	5	4
1319	2026/4/7 18:37:17	64秒	微信	N/A	112.224.220.29(山东-济南)	224	1	1	2	1	2	3	3	5	2	3	1	7	7	7	7	7	7	7	7	7	7	7	7	7	7	7	7	7	7	7	7	7	7	7	7	7	7	7	7	7	7	7	7
1320	2026/4/7 18:37:25	146秒	微信	N/A	39.144.109.189(山东-聊城)	128	1	1	2	1	4	1	1	2	1	1	1	4	4	4	4	4	4	4	4	4	4	4	4	4	4	4	4	4	4	4	4	4	4	4	4	4	4	4	4	4	4	4	4
1321	2026/4/7 18:37:36	149秒	微信	N/A	223.78.193.245(山东-潍坊)	128	2	1	2	1	4	1	1	1	2	2	4	4	4	4	4	4	4	4	4	4	4	4	4	4	4	4	4	4	4	4	4	4	4	4	4	4	4	4	4	4	4	4	4
1322	2026/4/7 18:37:48	166秒	微信	N/A	223.104.194.179(山东-济南)	91	2	1	2	1	3	1	1	2	1	2	1	2	2	3	4	2	2	3	3	2	3	2	3	3	3	3	3	3	2	3	2	2	2	3	3	3	3	4	4	3	4	4	3
1323	2026/4/7 18:38:13	149秒	微信	N/A	112.224.143.2(山东-济南)	135	2	1	2	1	2	1	1	2	1	3	1	7	2	7	4	4	3	4	7	5	4	4	4	4	4	4	4	4	4	4	4	4	4	4	4	4	4	4	4	4	4	4	4
1324	2026/4/7 18:38:30	69秒	微信	N/A	223.104.195.80(山东-泰安)	224	1	3	5	1	4	1	1	5	2	3	1	7	7	7	7	7	7	7	7	7	7	7	7	7	7	7	7	7	7	7	7	7	7	7	7	7	7	7	7	7	7	7	7
1325	2026/4/7 18:38:39	68秒	微信	N/A	223.104.194.183(山东-济南)	224	1	1	1	1	3	2	2	1	2	3	1	7	7	7	7	7	7	7	7	7	7	7	7	7	7	7	7	7	7	7	7	7	7	7	7	7	7	7	7	7	7	7	7
1326	2026/4/7 18:39:01	72秒	微信	N/A	223.104.53.245(福建-泉州)	224	2	1	5	2	1	4	4	1	2	1	1	7	7	7	7	7	7	7	7	7	7	7	7	7	7	7	7	7	7	7	7	7	7	7	7	7	7	7	7	7	7	7	7
1327	2026/4/7 18:39:04	117秒	微信	N/A	223.99.163.165(山东-济南)	192	2	1	2	1	2	3	3	1	1	1	1	6	6	6	6	6	6	6	6	6	6	6	6	6	6	6	6	6	6	6	6	6	6	6	6	6	6	6	6	6	6	6	6
1328	2026/4/7 18:39:46	492秒	微信	N/A	223.104.194.179(山东-济南)	151	1	1	1	1	4	1	1	2	2	3	1	4	1	4	7	6	7	7	4	6	6	5	5	4	2	4	4	7	5	6	3	4	4	6	7	2	1	1	4	6	6	6	7
1329	2026/4/7 18:40:46	67秒	微信	N/A	39.144.109.191(山东-聊城)	160	2	1	3	1	4	2	2	2	2	3	4	5	5	5	5	5	5	5	5	5	5	5	5	5	5	5	5	5	5	5	5	5	5	5	5	5	5	5	5	5	5	5	5
1330	2026/4/7 18:41:24	62秒	微信	N/A	112.224.226.59(山东-济南)	128	1	1	1	1	4	1	2	4	2	2	1	4	4	4	4	4	4	4	4	4	4	4	4	4	4	4	4	4	4	4	4	4	4	4	4	4	4	4	4	4	4	4	4
1331	2026/4/7 18:42:25	79秒	微信	N/A	112.53.79.14(山东-济南)	224	2	1	5	1	4	1	1	1	1	1	1	7	7	7	7	7	7	7	7	7	7	7	7	7	7	7	7	7	7	7	7	7	7	7	7	7	7	7	7	7	7	7	7
1332	2026/4/7 18:43:04	661秒	微信	N/A	223.104.194.172(山东-济南)	118	2	1	2	1	4	2	1	2	1	1	4	4	3	3	4	3	3	3	4	4	3	3	5	3	3	3	4	5	3	4	5	4	4	5	3	3	4	3	5	5	3	4	3
1333	2026/4/7 18:43:07	72秒	微信	N/A	223.104.194.148(山东-济南)	224	1	1	1	1	4	2	1	1	1	1	1	7	7	7	7	7	7	7	7	7	7	7	7	7	7	7	7	7	7	7	7	7	7	7	7	7	7	7	7	7	7	7	7
1334	2026/4/7 18:43:57	61秒	微信	N/A	223.99.163.166(山东-济南)	128	1	1	1	1	4	2	1	5	2	2	1	4	4	4	4	4	4	4	4	4	4	4	4	4	4	4	4	4	4	4	4	4	4	4	4	4	4	4	4	4	4	4	4
1335	2026/4/7 18:44:53	45秒	微信	N/A	112.224.218.175(山东-济南)	224	1	3	1	2	2	1	1	1	1	1	1	7	7	7	7	7	7	7	7	7	7	7	7	7	7	7	7	7	7	7	7	7	7	7	7	7	7	7	7	7	7	7	7
1336	2026/4/7 18:45:08	128秒	微信	N/A	39.144.109.190(山东-聊城)	123	2	1	3	1	4	1	1	3	2	2	1	4	3	3	4	3	3	4	3	4	4	4	4	4	4	4	4	4	4	4	4	4	4	4	4	4	4	4	4	4	4	4	4
1337	2026/4/7 18:46:16	98秒	微信	N/A	112.53.79.12(山东-济南)	68	1	1	1	1	4	1	1	2	2	2	3	4	3	6	3	2	2	2	2	2	2	1	2	2	2	2	2	2	1	2	2	2	2	2	1	2	2	2	2	2	2	1	2
1338	2026/4/7 18:47:09	102秒	微信	N/A	182.33.17.165(山东-济宁)	224	1	3	1	1	4	1	1	3	2	2	1	7	7	7	7	7	7	7	7	7	7	7	7	7	7	7	7	7	7	7	7	7	7	7	7	7	7	7	7	7	7	7	7
1339	2026/4/7 18:47:33	59秒	微信	N/A	112.37.209.174(山东-滨州)	224	2	4	2	2	2	2	2	4	2	1	1	7	7	7	7	7	7	7	7	7	7	7	7	7	7	7	7	7	7	7	7	7	7	7	7	7	7	7	7	7	7	7	7
1340	2026/4/7 18:48:05	80秒	微信	N/A	112.224.191.213(山东-济南)	224	1	1	2	1	1	1	1	1	1	1	1	7	7	7	7	7	7	7	7	7	7	7	7	7	7	7	7	7	7	7	7	7	7	7	7	7	7	7	7	7	7	7	7
1341	2026/4/7 18:49:25	74秒	微信	N/A	113.126.106.197(山东-菏泽)	160	1	1	1	1	4	4	4	5	2	3	4	5	5	5	5	5	5	5	5	5	5	5	5	5	5	5	5	5	5	5	5	5	5	5	5	5	5	5	5	5	5	5	5
1342	2026/4/7 18:51:40	76秒	微信	N/A	123.233.72.177(山东-济南)	117	1	3	1	1	3	2	2	3	2	2	1	1	1	1	1	5	4	4	4	4	4	4	4	4	4	4	4	4	4	4	4	4	4	4	4	4	4	4	4	4	4	4	4
1343	2026/4/7 18:51:45	94秒	微信	N/A	39.144.109.139(山东-聊城)	224	1	1	1	1	4	1	1	2	1	1	1	7	7	7	7	7	7	7	7	7	7	7	7	7	7	7	7	7	7	7	7	7	7	7	7	7	7	7	7	7	7	7	7
1344	2026/4/7 18:51:50	61秒	微信	N/A	112.224.162.193(山东-济南)	192	1	1	1	1	4	1	1	1	1	1	1	6	6	6	6	6	6	6	6	6	6	6	6	6	6	6	6	6	6	6	6	6	6	6	6	6	6	6	6	6	6	6	6
1345	2026/4/7 18:51:57	74秒	微信	N/A	182.39.165.223(山东-枣庄)	32	1	3	1	1	4	2	1	5	2	1	4	1	1	1	1	1	1	1	1	1	1	1	1	1	1	1	1	1	1	1	1	1	1	1	1	1	1	1	1	1	1	1	1
1346	2026/4/7 18:53:20	72秒	微信	N/A	112.53.79.11(山东-济南)	160	2	1	5	1	4	3	2	5	2	1	4	5	5	5	5	5	5	5	5	5	5	5	5	5	5	5	5	5	5	5	5	5	5	5	5	5	5	5	5	5	5	5	5
1347	2026/4/7 18:53:26	427秒	微信	N/A	182.39.155.17(山东-枣庄)	89	2	2	3	1	2	1	1	2	1	3	1	5	5	4	4	3	1	2	2	2	1	1	3	4	3	4	2	3	3	5	2	2	4	2	3	1	1	1	4	3	3	3	3
1348	2026/4/7 18:53:34	59秒	微信	N/A	112.224.224.211(山东-济南)	128	2	2	3	1	4	2	2	2	2	3	3	4	4	4	4	4	4	4	4	4	4	4	4	4	4	4	4	4	4	4	4	4	4	4	4	4	4	4	4	4	4	4	4
1349	2026/4/7 18:54:49	72秒	微信	N/A	144.12.90.149(山东-济南)	198	2	2	3	1	2	1	1	3	1	1	1	7	5	7	7	5	5	5	5	5	5	5	5	5	5	5	5	7	7	7	7	7	7	7	7	7	7	7	7	7	7	7	7
1350	2026/4/7 18:54:49	132秒	微信	N/A	112.224.143.248(山东-济南)	218	2	2	3	1	2	2	2	2	1	1	1	7	7	7	7	7	6	6	7	7	6	7	7	6	6	7	7	6	7	7	7	7	7	7	7	7	7	7	7	7	7	7	7
1351	2026/4/7 18:55:25	75秒	微信	N/A	39.144.109.191(山东-聊城)	160	1	1	2	1	4	1	1	5	2	3	1	5	5	5	5	5	5	5	5	5	5	5	5	5	5	5	5	5	5	5	5	5	5	5	5	5	5	5	5	5	5	5	5
1352	2026/4/7 18:55:46	159秒	微信	N/A	112.9.4.202(山东-日照)	160	2	4	2	1	4	1	1	3	2	1	2	5	4	5	6	5	4	5	6	5	4	5	6	5	4	5	6	5	5	4	6	5	4	5	6	5	4	5	6	5	4	5	6
1353	2026/4/7 18:55:48	132秒	微信	N/A	123.233.72.114(山东-济南)	174	1	3	1	1	4	1	1	1	2	2	1	3	3	3	5	5	5	5	5	5	5	5	5	6	6	6	6	6	6	6	6	6	6	6	6	6	6	6	6	6	6	6	6
1354	2026/4/7 18:56:03	57秒	微信	N/A	223.104.194.106(山东-济南)	32	1	3	1	1	1	1	1	3	2	1	1	1	1	1	1	1	1	1	1	1	1	1	1	1	1	1	1	1	1	1	1	1	1	1	1	1	1	1	1	1	1	1	1
1355	2026/4/7 18:56:16	204秒	微信	N/A	112.230.183.212(山东-济南)	79	1	2	3	1	4	2	1	5	2	3	4	1	1	1	1	1	1	1	1	1	1	1	1	1	1	1	1	7	7	2	7	1	7	7	7	1	1	1	7	2	2	2	2
1356	2026/4/7 18:56:45	85秒	微信	N/A	223.104.194.173(山东-济南)	217	2	2	3	1	1	3	2	1	1	1	3	7	7	7	6	7	7	7	7	7	7	7	7	7	7	7	7	7	7	7	7	7	6	7	6	7	6	7	6	7	7	6	6
1357	2026/4/7 18:56:53	480秒	微信	N/A	112.224.225.236(山东-济南)	99	2	2	3	1	4	1	1	5	2	3	1	3	2	3	2	4	2	3	2	3	3	3	3	2	2	4	3	4	4	3	3	4	4	3	4	3	3	3	3	3	4	3	4
1358	2026/4/7 18:57:02	82秒	微信	N/A	223.104.195.249(山东-泰安)	128	2	2	3	1	2	2	2	2	2	3	4	4	4	4	4	4	4	4	4	4	4	4	4	4	4	4	4	4	4	4	4	4	4	4	4	4	4	4	4	4	4	4	4
1359	2026/4/7 18:57:44	114秒	微信	N/A	112.224.224.128(山东-济南)	147	2	2	3	1	4	1	1	4	2	3	1	5	5	5	5	5	5	5	5	4	5	5	5	4	4	4	4	5	5	5	5	3	3	3	3	5	5	5	5	5	5	5	5
1360	2026/4/7 18:58:04	116秒	微信	N/A	112.224.228.100(山东-济南)	224	1	3	1	1	2	3	1	2	2	1	1	7	7	7	7	7	7	7	7	7	7	7	7	7	7	7	7	7	7	7	7	7	7	7	7	7	7	7	7	7	7	7	7
1361	2026/4/7 18:58:13	82秒	微信	N/A	112.224.225.45(山东-济南)	153	2	2	3	1	4	3	1	2	1	1	4	6	6	6	6	4	4	4	4	4	4	4	4	5	5	3	5	4	3	5	5	5	6	5	6	5	5	5	5	5	5	5	5
1362	2026/4/7 18:58:22	123秒	微信	N/A	223.104.194.137(山东-济南)	66	1	3	1	1	4	2	2	2	2	3	4	3	2	2	4	2	2	2	2	2	2	2	2	2	2	2	2	2	2	2	2	2	2	2	2	2	1	2	2	2	2	2	2
1363	2026/4/7 18:59:15	70秒	微信	N/A	112.224.226.0(山东-济南)	132	2	2	3	1	1	2	1	2	1	2	3	5	5	5	5	4	4	4	4	4	4	4	4	4	4	4	4	4	4	4	4	4	4	4	4	4	4	4	4	4	4	4	4
1364	2026/4/7 18:59:32	362秒	微信	N/A	223.99.163.166(山东-济南)	88	1	3	1	1	3	1	1	4	1	2	1	4	2	3	3	2	2	4	2	4	4	4	4	3	1	1	1	6	3	3	1	2	1	2	2	3	3	3	3	3	3	3	3
1365	2026/4/7 18:59:35	65秒	微信	N/A	113.128.51.30(山东-济南)	129	2	3	2	1	2	1	1	5	2	3	1	5	4	4	4	4	4	4	4	4	4	4	4	4	4	4	4	4	4	4	4	4	4	4	4	4	4	4	4	4	4	4	4
1366	2026/4/7 19:02:59	239秒	微信	N/A	182.39.20.139(山东-济南)	132	2	2	2	1	4	1	2	5	2	1	2	4	4	4	4	4	6	4	6	4	5	3	3	5	4	4	4	7	5	4	3	1	5	1	6	4	4	4	4	5	4	4	3
1367	2026/4/7 19:03:01	110秒	微信	N/A	223.104.194.159(山东-济南)	224	2	1	3	1	2	3	1	4	2	2	4	7	7	7	7	7	7	7	7	7	7	7	7	7	7	7	7	7	7	7	7	7	7	7	7	7	7	7	7	7	7	7	7
1368	2026/4/7 19:03:23	188秒	微信	N/A	123.233.72.136(山东-济南)	126	2	1	5	1	4	3	3	2	2	2	1	3	4	6	6	6	6	6	6	5	5	5	4	3	5	4	5	3	5	3	2	2	5	2	5	2	2	2	2	3	3	3	3
1369	2026/4/7 19:03:57	256秒	微信	N/A	112.224.218.25(山东-济南)	72	1	3	1	1	4	1	2	1	1	1	4	3	2	3	3	2	3	2	3	2	2	3	2	2	2	2	2	3	3	3	2	1	4	3	2	1	1	1	1	3	2	2	2
1370	2026/4/7 19:03:59	58秒	微信	N/A	223.104.194.143(山东-济南)	206	1	3	1	1	2	1	1	2	1	1	1	7	7	7	6	7	7	7	7	7	7	7	7	7	7	6	7	6	6	6	6	6	6	6	6	6	6	6	6	6	6	6	6
1371	2026/4/7 19:05:45	81秒	微信	N/A	223.104.194.152(山东-济南)	32	1	1	1	1	4	1	1	1	1	1	1	1	1	1	1	1	1	1	1	1	1	1	1	1	1	1	1	1	1	1	1	1	1	1	1	1	1	1	1	1	1	1	1
1372	2026/4/7 19:07:00	77秒	微信	N/A	112.224.225.248(山东-济南)	130	2	2	3	1	4	2	1	1	2	2	2	5	5	4	4	4	4	4	4	4	4	4	4	4	4	4	4	4	4	4	4	4	4	4	4	4	4	4	4	4	4	4	4
1373	2026/4/7 19:08:23	71秒	微信	N/A	223.104.194.140(山东-济南)	192	2	2	1	1	2	3	2	3	2	2	1	6	6	6	6	6	6	6	6	6	6	6	6	6	6	6	6	6	6	6	6	6	6	6	6	6	6	6	6	6	6	6	6
1374	2026/4/7 19:10:09	67秒	微信	N/A	39.144.109.148(山东-聊城)	192	1	2	2	1	2	3	2	1	1	1	3	6	6	6	6	6	6	6	6	6	6	6	6	6	6	6	6	6	6	6	6	6	6	6	6	6	6	6	6	6	6	6	6
1375	2026/4/7 19:12:18	72秒	微信	N/A	223.104.194.138(山东-济南)	176	2	2	3	1	4	1	1	2	2	2	1	6	6	6	6	6	6	6	6	6	6	6	6	6	6	6	6	5	5	5	5	5	5	5	5	5	5	5	5	5	5	5	5
1376	2026/4/7 19:12:31	55秒	微信	N/A	223.104.194.182(山东-济南)	160	2	2	3	2	1	2	2	2	2	2	4	5	5	5	5	5	5	5	5	5	5	5	5	5	5	5	5	5	5	5	5	5	5	5	5	5	5	5	5	5	5	5	5
1377	2026/4/7 19:12:33	69秒	微信	N/A	223.104.194.172(山东-济南)	224	2	2	3	2	2	3	2	3	2	1	4	7	7	7	7	7	7	7	7	7	7	7	7	7	7	7	7	7	7	7	7	7	7	7	7	7	7	7	7	7	7	7	7
1378	2026/4/7 19:12:48	54秒	微信	N/A	112.232.212.182(山东-济南)	128	2	2	3	2	2	2	1	3	1	2	1	4	4	4	4	4	4	4	4	4	4	4	4	4	4	4	4	4	4	4	4	4	4	4	4	4	4	4	4	4	4	4	4
1379	2026/4/7 19:12:52	82秒	微信	N/A	39.144.109.187(山东-聊城)	128	1	2	3	2	4	1	1	4	1	2	1	4	4	4	4	4	4	4	4	4	4	4	4	4	4	4	4	4	4	4	4	4	4	4	4	4	4	4	4	4	4	4	4
1380	2026/4/7 19:12:59	215秒	微信	N/A	112.224.163.126(山东-济南)	104	2	1	5	2	4	3	3	1	1	2	1	2	2	3	4	3	2	4	3	3	4	3	4	3	3	4	3	3	4	3	3	2	3	2	3	5	4	4	4	3	4	3	4
1381	2026/4/7 19:13:06	72秒	微信	N/A	223.99.163.164(山东-济南)	128	1	1	3	2	4	1	1	4	1	1	4	4	4	4	4	4	4	4	4	4	4	4	4	4	4	4	4	4	4	4	4	4	4	4	4	4	4	4	4	4	4	4	4
1382	2026/4/7 19:13:07	55秒	微信	N/A	112.224.222.243(山东-济南)	128	2	1	3	2	2	2	2	1	1	1	4	4	4	4	4	4	4	4	4	4	4	4	4	4	4	4	4	4	4	4	4	4	4	4	4	4	4	4	4	4	4	4	4
1383	2026/4/7 19:13:11	92秒	微信	N/A	223.104.194.170(山东-济南)	224	1	2	3	2	4	2	3	5	1	1	1	7	7	7	7	7	7	7	7	7	7	7	7	7	7	7	7	7	7	7	7	7	7	7	7	7	7	7	7	7	7	7	7
1384	2026/4/7 19:13:17	936秒	微信	N/A	223.99.163.164(山东-济南)	175	2	1	5	2	2	2	1	3	1	3	1	4	5	4	6	5	5	5	5	5	5	5	5	5	5	5	5	6	6	6	6	6	6	6	6	6	6	6	6	6	6	6	6
1385	2026/4/7 19:13:25	105秒	微信	N/A	223.104.196.64(山东-济宁)	128	2	1	3	2	3	3	3	1	1	1	4	3	3	4	6	6	6	6	6	5	5	5	5	4	4	4	4	4	4	4	4	3	3	3	3	3	3	3	3	3	3	3	3
1386	2026/4/7 19:13:32	124秒	微信	N/A	39.144.109.187(山东-聊城)	151	2	2	3	2	1	4	3	3	2	1	1	4	2	5	5	3	5	3	4	4	6	2	4	5	4	6	4	5	6	5	3	3	7	4	4	7	7	7	7	7	5	5	3
1387	2026/4/7 19:13:34	105秒	微信	N/A	223.104.194.180(山东-济南)	129	1	2	3	2	4	1	1	4	1	2	1	4	4	5	4	4	4	4	4	4	4	4	4	4	4	4	4	4	4	4	4	4	4	4	4	4	4	4	4	4	4	4	4
1388	2026/4/7 19:13:36	58秒	微信	N/A	39.144.109.164(山东-聊城)	115	2	2	3	2	4	2	2	1	1	1	1	2	4	3	4	3	3	5	3	4	3	3	5	3	3	5	4	3	4	3	4	3	5	3	4	4	4	3	4	3	4	3	4
1389	2026/4/7 19:13:36	57秒	微信	N/A	223.104.195.232(山东-泰安)	224	2	2	5	2	4	2	2	3	2	1	1	7	7	7	7	7	7	7	7	7	7	7	7	7	7	7	7	7	7	7	7	7	7	7	7	7	7	7	7	7	7	7	7
1390	2026/4/7 19:13:44	130秒	微信	N/A	112.224.219.178(山东-济南)	113	2	2	3	2	2	2	1	4	2	1	2	4	4	4	4	3	4	5	4	3	4	4	3	4	4	4	4	4	3	4	3	2	3	2	5	3	2	2	3	3	4	4	4
1391	2026/4/7 19:13:45	87秒	微信	N/A	112.224.141.41(山东-济南)	128	1	2	3	2	2	3	3	1	1	1	2	4	4	4	4	4	4	4	4	4	4	4	4	4	4	4	4	4	4	4	4	4	4	4	4	4	4	4	4	4	4	4	4
1392	2026/4/7 19:13:47	131秒	微信	N/A	223.104.194.170(山东-济南)	192	2	2	3	2	2	1	3	3	2	1	2	6	6	6	6	6	6	6	6	6	6	6	6	6	6	6	6	6	6	6	6	6	6	6	6	6	6	6	6	6	6	6	6
1393	2026/4/7 19:13:54	104秒	微信	N/A	123.233.72.35(山东-济南)	96	1	2	3	2	4	1	1	4	2	2	4	3	3	3	5	1	1	4	3	2	2	2	4	7	7	5	2	4	4	3	3	3	3	3	2	2	2	3	6	1	1	1	1
1394	2026/4/7 19:13:56	84秒	微信	N/A	223.104.194.134(山东-济南)	218	2	1	3	2	1	3	3	5	2	3	1	7	1	7	7	7	7	7	7	7	7	7	7	7	7	7	7	7	7	7	7	7	7	7	7	7	7	7	7	7	7	7	7
1395	2026/4/7 19:14:07	91秒	微信	N/A	39.144.109.149(山东-聊城)	32	2	2	3	2	2	3	2	2	2	3	4	1	1	1	1	1	1	1	1	1	1	1	1	1	1	1	1	1	1	1	1	1	1	1	1	1	1	1	1	1	1	1	1
1396	2026/4/7 19:14:09	104秒	微信	N/A	223.104.194.142(山东-济南)	128	2	2	3	2	2	2	2	2	2	2	1	4	4	4	4	4	4	4	4	4	4	4	4	4	4	4	4	4	4	4	4	4	4	4	4	4	4	4	4	4	4	4	4
1397	2026/4/7 19:14:09	71秒	微信	N/A	112.224.162.124(山东-济南)	126	2	4	2	2	4	2	2	3	2	1	3	4	4	4	4	4	3	4	4	4	3	4	4	4	4	4	4	4	4	4	4	4	4	4	4	4	4	4	4	4	4	4	4
1398	2026/4/7 19:14:09	91秒	微信	N/A	112.53.79.13(山东-济南)	132	1	2	3	2	1	1	1	4	2	3	4	4	4	3	4	5	4	4	4	3	4	5	4	4	3	5	4	4	4	5	4	4	5	4	4	4	5	4	4	4	4	5	4
1399	2026/4/7 19:14:17	82秒	微信	N/A	112.224.163.31(山东-济南)	130	2	2	3	2	4	1	1	3	1	2	1	4	4	4	4	4	5	3	5	4	3	4	5	5	4	3	4	5	4	3	5	4	3	4	5	4	3	4	5	4	3	4	5
1400	2026/4/7 19:14:17	82秒	微信	N/A	39.144.109.161(山东-聊城)	128	2	2	3	2	2	2	2	1	1	1	4	4	4	4	4	4	4	4	4	4	4	4	4	4	4	4	4	4	4	4	4	4	4	4	4	4	4	4	4	4	4	4	4
1401	2026/4/7 19:14:23	62秒	微信	N/A	218.58.41.81(山东-济南)	177	2	2	3	2	1	2	2	3	1	1	2	5	6	5	6	5	6	6	6	5	5	5	6	5	5	6	6	5	6	5	6	6	5	6	5	6	6	6	6	5	6	5	5
1402	2026/4/7 19:14:31	116秒	微信	N/A	223.99.163.164(山东-济南)	83	1	2	3	2	4	1	1	5	2	3	4	6	1	3	3	2	2	2	2	2	2	2	2	2	2	2	3	4	3	4	4	4	5	3	3	1	1	1	1	3	3	2	3
1403	2026/4/7 19:14:36	74秒	微信	N/A	84.17.57.186(香港-未知)	32	1	2	3	2	2	2	1	5	2	3	4	1	1	1	1	1	1	1	1	1	1	1	1	1	1	1	1	1	1	1	1	1	1	1	1	1	1	1	1	1	1	1	1
1404	2026/4/7 19:14:38	96秒	微信	N/A	39.144.109.89(山东-聊城)	128	2	4	3	2	2	3	3	3	1	2	3	4	4	4	4	4	4	4	4	4	4	4	4	4	4	4	4	4	4	4	4	4	4	4	4	4	4	4	4	4	4	4	4
1405	2026/4/7 19:14:39	119秒	微信	N/A	223.104.196.242(山东-菏泽)	167	1	2	3	2	4	2	1	1	1	2	2	5	3	5	6	4	5	6	6	7	6	6	5	3	5	5	7	6	7	6	4	3	7	7	7	5	5	4	5	4	4	4	5
1406	2026/4/7 19:15:03	162秒	微信	N/A	223.160.165.193(山东-济南)	113	1	1	3	2	4	1	1	2	2	3	4	5	4	3	5	2	1	3	4	4	4	4	2	4	4	4	4	6	4	4	4	2	4	3	5	1	1	1	5	4	4	4	4
1407	2026/4/7 19:15:05	90秒	微信	N/A	112.53.79.14(山东-济南)	128	2	2	3	2	4	1	1	1	2	2	4	4	4	4	4	4	4	4	4	4	4	4	4	4	4	4	4	4	4	4	4	4	4	4	4	4	4	4	4	4	4	4	4
1408	2026/4/7 19:15:06	91秒	微信	N/A	123.233.72.92(山东-济南)	128	2	2	3	2	4	1	1	4	2	3	1	4	4	3	5	4	4	4	4	4	4	4	4	4	4	4	4	4	4	4	4	4	4	4	4	4	4	4	4	4	4	4	4
1409	2026/4/7 19:15:12	144秒	微信	N/A	112.224.221.156(山东-济南)	177	2	2	2	2	2	2	3	1	1	2	4	6	4	4	3	7	7	7	5	6	7	4	5	4	4	3	6	7	7	7	4	3	6	5	3	6	6	6	7	7	7	7	7
1410	2026/4/7 19:15:12	83秒	微信	N/A	39.144.109.150(山东-聊城)	96	2	2	3	2	4	1	1	4	2	3	4	3	3	3	3	3	3	3	3	3	3	3	3	3	3	3	3	3	3	3	3	3	3	3	3	3	3	3	3	3	3	3	3
1411	2026/4/7 19:15:31	153秒	微信	N/A	112.224.221.238(山东-济南)	192	1	2	3	2	3	3	1	4	1	1	2	7	1	6	7	7	1	7	7	7	7	7	2	7	7	7	7	6	7	7	7	6	7	7	7	6	5	4	7	5	4	6	7
1412	2026/4/7 19:15:40	432秒	微信	N/A	182.33.238.120(山东-潍坊)	147	1	3	1	1	4	2	2	5	2	2	1	4	6	6	7	4	4	7	4	4	4	4	4	7	4	4	4	7	4	7	4	4	4	4	4	4	4	4	4	4	4	4	4
1413	2026/4/7 19:15:48	119秒	微信	N/A	39.144.109.177(山东-聊城)	128	1	1	5	2	2	2	3	1	1	1	4	4	4	4	4	4	4	4	4	4	4	4	4	4	4	4	4	4	4	4	4	4	4	4	4	4	4	4	4	4	4	4	4
1414	2026/4/7 19:15:48	52秒	微信	N/A	223.104.194.145(山东-济南)	224	2	2	3	2	4	1	1	2	2	3	1	7	7	7	7	7	7	7	7	7	7	7	7	7	7	7	7	7	7	7	7	7	7	7	7	7	7	7	7	7	7	7	7
1415	2026/4/7 19:15:49	64秒	微信	N/A	223.104.194.145(山东-济南)	171	2	2	3	2	2	1	2	3	1	1	1	6	6	6	6	6	6	6	6	6	6	6	6	5	5	5	5	5	5	5	5	5	5	5	5	5	5	4	5	5	5	5	5
1416	2026/4/7 19:15:50	66秒	微信	N/A	112.224.225.27(山东-济南)	128	2	2	3	2	2	3	3	1	1	1	2	4	4	4	4	4	4	4	4	4	4	4	4	4	4	4	4	4	4	4	4	4	4	4	4	4	4	4	4	4	4	4	4
1417	2026/4/7 19:16:00	58秒	微信	N/A	39.144.109.171(山东-聊城)	128	2	2	3	2	2	2	2	4	2	3	1	4	4	4	4	4	4	4	4	4	4	4	4	4	4	4	4	4	4	4	4	4	4	4	4	4	4	4	4	4	4	4	4
1418	2026/4/7 19:16:08	50秒	微信	N/A	112.224.228.104(山东-济南)	160	2	2	3	2	2	3	3	3	2	2	4	5	5	5	5	5	5	5	5	5	5	5	5	5	5	5	5	5	5	5	5	5	5	5	5	5	5	5	5	5	5	5	5
1419	2026/4/7 19:16:09	146秒	微信	N/A	223.104.196.21(山东-济宁)	140	2	2	2	2	1	2	1	2	2	1	1	4	4	4	4	4	4	4	4	4	4	4	4	4	4	4	4	7	7	7	7	4	4	4	4	4	4	4	4	4	4	4	4
1420	2026/4/7 19:16:15	172秒	微信	N/A	182.33.249.238(山东-潍坊)	160	2	2	5	2	2	1	1	3	2	2	1	5	5	5	5	5	5	5	5	5	5	5	5	5	5	5	5	5	5	5	5	5	5	5	5	5	5	5	5	5	5	5	5
1421	2026/4/7 19:16:32	211秒	微信	N/A	112.237.32.130(山东-烟台)	72	2	4	3	2	2	2	1	4	1	1	2	1	1	1	1	4	4	1	3	4	4	4	6	3	3	3	1	1	2	1	2	4	4	4	2	1	1	1	1	1	1	1	1
1422	2026/4/7 19:16:32	76秒	微信	N/A	39.144.109.147(山东-聊城)	224	2	1	3	2	2	2	2	1	1	1	1	7	7	7	7	7	7	7	7	7	7	7	7	7	7	7	7	7	7	7	7	7	7	7	7	7	7	7	7	7	7	7	7
1423	2026/4/7 19:16:35	139秒	微信	N/A	223.99.163.165(山东-济南)	224	1	2	3	2	2	1	1	3	2	1	1	7	7	7	7	7	7	7	7	7	7	7	7	7	7	7	7	7	7	7	7	7	7	7	7	7	7	7	7	7	7	7	7
1424	2026/4/7 19:16:40	72秒	微信	N/A	112.53.79.13(山东-济南)	136	1	2	3	2	4	1	1	5	2	3	4	5	3	4	5	4	5	4	4	5	5	4	4	6	5	4	5	5	5	7	4	1	4	5	3	4	2	5	3	4	5	3	4
1425	2026/4/7 19:16:47	54秒	微信	N/A	223.104.194.179(山东-济南)	183	1	1	5	2	4	2	1	2	2	1	2	7	7	7	7	7	7	7	7	5	6	6	5	5	5	5	5	6	6	5	5	5	6	5	5	5	5	5	5	6	6	5	5
1426	2026/4/7 19:16:47	163秒	微信	N/A	112.224.223.152(山东-济南)	159	2	2	3	2	4	2	1	2	2	2	1	5	4	5	5	5	5	5	5	5	5	5	5	5	5	5	5	5	5	5	5	5	5	5	5	5	5	5	5	5	5	5	5
1427	2026/4/7 19:16:52	110秒	微信	N/A	223.104.195.239(山东-泰安)	127	2	2	3	2	4	1	1	1	1	1	1	3	4	4	4	4	4	4	4	4	4	4	4	4	4	4	4	4	4	4	4	4	4	4	4	4	4	4	4	4	4	4	4
1428	2026/4/7 19:16:52	92秒	微信	N/A	112.224.220.129(山东-济南)	128	2	1	3	2	3	2	2	4	2	3	4	4	4	4	4	4	4	4	4	4	4	4	4	4	4	4	4	4	4	4	4	4	4	4	4	4	4	4	4	4	4	4	4
1429	2026/4/7 19:16:57	100秒	微信	N/A	223.104.194.184(山东-济南)	123	2	1	3	2	4	1	1	3	2	1	2	4	4	4	4	4	4	4	4	4	4	4	4	4	4	4	4	4	3	4	4	3	3	3	3	4	4	4	4	4	4	4	4
1430	2026/4/7 19:17:02	71秒	微信	N/A	112.224.220.200(山东-济南)	224	2	1	3	2	4	1	1	5	2	1	4	7	7	7	7	7	7	7	7	7	7	7	7	7	7	7	7	7	7	7	7	7	7	7	7	7	7	7	7	7	7	7	7
1431	2026/4/7 19:17:04	60秒	微信	N/A	39.144.109.141(山东-聊城)	141	1	1	3	2	2	3	2	2	2	2	4	5	5	5	5	4	5	4	5	5	4	5	4	4	5	4	5	4	5	4	4	4	5	4	4	3	5	4	4	5	4	4	4
1432	2026/4/7 19:17:05	105秒	微信	N/A	124.133.254.248(山东-济南)	224	1	1	3	2	4	1	1	3	2	1	4	7	7	7	7	7	7	7	7	7	7	7	7	7	7	7	7	7	7	7	7	7	7	7	7	7	7	7	7	7	7	7	7
1433	2026/4/7 19:17:09	146秒	微信	N/A	39.144.109.164(山东-聊城)	150	2	2	5	2	4	1	1	3	2	1	4	4	3	4	5	4	4	4	5	7	5	4	6	4	5	5	4	5	4	4	5	5	4	4	4	5	5	5	5	7	6	5	4
1434	2026/4/7 19:17:12	141秒	微信	N/A	39.144.109.157(山东-聊城)	169	1	1	3	2	2	1	1	1	1	2	4	4	2	5	6	6	4	6	5	5	6	6	4	6	6	5	6	7	4	7	3	3	6	7	7	5	6	5	5	6	6	5	5
1435	2026/4/7 19:17:24	122秒	微信	N/A	39.144.109.84(山东-聊城)	128	2	1	3	2	3	2	1	2	2	3	4	4	4	4	4	4	4	4	4	4	4	4	4	4	4	4	4	4	4	4	4	4	4	4	4	4	4	4	4	4	4	4	4
1436	2026/4/7 19:17:36	142秒	微信	N/A	223.99.163.164(山东-济南)	195	2	1	3	2	4	1	1	1	2	1	4	6	4	6	6	5	5	7	7	5	6	6	7	7	7	7	7	7	6	7	5	4	4	6	6	7	7	7	7	6	6	6	6
1437	2026/4/7 19:17:38	64秒	微信	N/A	39.144.109.175(山东-聊城)	128	1	1	3	2	2	2	2	3	1	3	4	4	4	4	4	4	4	4	4	4	4	4	4	4	4	4	4	4	4	4	4	4	4	4	4	4	4	4	4	4	4	4	4
1438	2026/4/7 19:17:47	92秒	微信	N/A	223.99.163.165(山东-济南)	91	1	1	3	2	1	3	3	4	2	2	4	4	4	4	4	1	1	1	1	1	1	1	1	1	1	1	1	4	4	4	4	4	4	4	4	4	4	4	4	4	3	4	4
1439	2026/4/7 19:17:54	285秒	微信	N/A	39.144.109.191(山东-聊城)	129	2	1	5	2	2	2	1	2	1	1	4	3	3	4	5	4	4	4	4	4	4	4	4	4	4	4	4	5	3	4	3	5	4	4	4	4	5	4	4	3	5	5	4
1440	2026/4/7 19:18:00	157秒	微信	N/A	223.104.194.132(山东-济南)	124	2	2	5	2	4	1	2	3	2	1	4	5	5	5	5	4	4	4	4	3	3	3	3	4	4	4	4	4	4	4	4	3	3	3	3	4	4	4	4	4	4	4	4
1441	2026/4/7 19:18:05	73秒	微信	N/A	223.99.163.165(山东-济南)	118	1	4	3	2	2	2	1	3	2	2	1	5	5	5	4	4	4	4	3	4	3	4	3	4	3	4	3	4	3	4	3	4	3	4	3	4	3	4	3	4	3	4	3
1442	2026/4/7 19:18:06	168秒	微信	N/A	223.99.163.164(山东-济南)	147	2	1	3	2	4	1	1	3	2	1	4	6	2	3	6	5	6	6	3	4	5	5	5	6	6	6	4	4	4	4	4	3	4	5	4	4	6	5	6	5	3	4	4
1443	2026/4/7 19:18:11	120秒	微信	N/A	223.104.194.138(山东-济南)	128	2	1	3	2	2	1	3	3	2	1	4	4	4	4	4	4	4	4	4	4	4	4	4	4	4	4	4	4	4	4	4	4	4	4	4	4	4	4	4	4	4	4	4
1444	2026/4/7 19:18:15	167秒	微信	N/A	39.144.109.130(山东-聊城)	146	2	1	3	2	2	2	2	1	2	1	4	7	4	6	6	4	4	4	4	4	5	4	4	5	5	4	6	5	5	5	4	4	5	5	5	4	4	4	4	4	4	4	4
1445	2026/4/7 19:18:17	287秒	微信	N/A	39.144.108.172(山东-东营)	147	2	2	5	2	3	3	3	2	2	1	4	5	4	4	4	5	6	6	5	4	5	4	4	5	4	4	4	6	4	4	4	4	6	4	5	5	4	4	5	5	5	5	4
1446	2026/4/7 19:18:17	152秒	微信	N/A	112.224.190.8(山东-济南)	131	1	1	3	2	2	2	2	1	1	2	1	7	4	4	4	4	4	4	4	4	4	4	4	4	4	4	4	4	4	4	4	4	4	4	4	4	4	4	4	4	4	4	4
1447	2026/4/7 19:18:18	120秒	微信	N/A	39.144.109.139(山东-聊城)	153	2	1	3	2	4	2	1	2	2	3	1	7	6	4	7	2	2	2	2	1	1	1	1	7	7	7	7	7	4	1	4	4	7	7	7	7	7	7	7	6	4	7	3
1448	2026/4/7 19:18:18	207秒	微信	N/A	112.224.222.188(山东-济南)	127	2	2	3	2	4	2	1	4	2	2	1	4	3	4	4	4	4	4	4	4	4	4	4	4	4	4	4	4	4	4	4	4	4	4	4	4	4	4	4	4	4	4	4
1449	2026/4/7 19:18:19	54秒	微信	N/A	111.55.120.31(山东-济南)	160	1	1	1	1	1	4	4	1	1	2	1	5	5	5	5	5	5	5	5	5	5	5	5	5	5	5	5	5	5	5	5	5	5	5	5	5	5	5	5	5	5	5	5
1450	2026/4/7 19:18:24	85秒	微信	N/A	112.224.218.113(山东-济南)	215	1	4	3	2	4	1	1	2	1	1	1	7	7	7	7	7	7	7	7	7	7	7	7	7	7	7	7	5	5	5	5	7	7	7	7	6	7	7	7	7	7	7	7
1451	2026/4/7 19:18:26	75秒	微信	N/A	223.104.194.186(山东-济南)	112	2	2	5	2	1	4	4	5	2	2	4	3	4	2	2	3	3	4	4	4	4	4	4	3	3	4	3	4	3	4	3	4	4	4	4	4	3	3	4	3	4	3	4
1452	2026/4/7 19:18:34	75秒	微信	N/A	119.182.26.252(山东-济宁)	207	2	4	3	2	2	3	2	1	2	1	1	7	7	7	7	7	7	7	7	7	7	7	7	6	6	7	6	7	6	7	6	6	6	6	6	6	6	6	6	6	6	6	6
1453	2026/4/7 19:18:35	163秒	微信	N/A	223.160.164.42(山东-济南)	157	1	1	3	2	2	4	3	3	1	1	1	4	3	3	3	5	5	5	5	5	5	5	5	5	5	5	5	6	4	5	5	3	5	5	5	7	7	7	7	5	4	5	4
1454	2026/4/7 19:18:43	115秒	微信	N/A	112.53.79.13(山东-济南)	214	1	4	3	2	4	1	1	1	1	2	4	5	4	4	5	7	7	7	7	7	7	7	7	7	7	7	7	7	7	7	7	7	7	7	7	7	7	7	7	7	7	7	7
1455	2026/4/7 19:18:43	103秒	微信	N/A	112.224.218.57(山东-济南)	108	2	2	3	2	2	1	1	4	2	2	4	1	2	2	2	2	6	5	2	2	5	2	2	2	6	2	2	2	6	6	2	2	6	2	6	2	5	4	4	4	4	4	4
1456	2026/4/7 19:18:50	75秒	微信	N/A	223.99.163.165(山东-济南)	124	2	4	3	2	2	1	1	1	2	1	3	4	4	4	4	4	4	3	3	3	4	4	4	4	4	3	4	4	4	4	4	4	4	4	4	4	4	4	4	4	4	4	4
1457	2026/4/7 19:18:58	72秒	微信	N/A	39.144.109.17(山东-聊城)	224	2	4	3	2	2	3	1	1	1	2	1	7	7	7	7	7	7	7	7	7	7	7	7	7	7	7	7	7	7	7	7	7	7	7	7	7	7	7	7	7	7	7	7
1458	2026/4/7 19:19:07	229秒	微信	N/A	39.144.109.153(山东-聊城)	122	2	1	3	2	4	1	1	3	2	1	4	3	2	2	4	4	2	4	3	3	4	3	3	4	3	3	4	7	3	6	4	2	2	3	3	6	6	6	7	4	4	4	4
1459	2026/4/7 19:19:12	144秒	微信	N/A	39.144.109.173(山东-聊城)	138	2	4	3	2	4	1	1	2	2	2	1	4	4	4	4	4	4	3	5	4	4	4	4	4	4	5	4	4	4	4	4	5	5	5	5	4	5	4	4	6	5	5	4
1460	2026/4/7 19:19:32	126秒	微信	N/A	39.144.109.167(山东-聊城)	111	2	1	5	2	4	1	1	4	2	2	4	3	3	3	3	3	3	3	3	3	3	3	3	3	3	3	3	4	4	4	4	3	4	4	4	4	4	4	4	4	4	4	4
1461	2026/4/7 19:19:37	201秒	微信	N/A	112.53.79.13(山东-济南)	187	2	1	3	2	4	1	1	2	1	1	4	7	7	7	7	5	5	7	4	5	7	5	6	6	5	5	5	6	5	6	4	4	7	5	7	7	7	7	7	5	5	6	6
1462	2026/4/7 19:19:42	255秒	微信	N/A	112.224.225.17(山东-济南)	146	2	1	3	2	3	2	2	1	2	2	3	4	4	4	4	5	5	5	5	4	4	4	4	6	6	6	6	5	5	5	5	3	4	4	4	3	4	4	4	5	5	5	5
1463	2026/4/7 19:19:58	181秒	微信	N/A	112.224.227.146(山东-济南)	145	2	1	3	2	4	3	3	2	2	1	2	7	3	5	7	1	1	5	2	6	7	5	1	4	6	5	7	6	5	3	1	1	5	5	5	6	4	4	7	6	5	5	5
1464	2026/4/7 19:20:03	76秒	微信	N/A	223.104.194.129(山东-济南)	128	2	1	3	2	2	1	1	5	2	2	4	4	4	4	4	4	4	4	4	4	4	4	4	4	4	4	4	4	4	4	4	4	4	4	4	4	4	4	4	4	4	4	4
1465	2026/4/7 19:21:10	147秒	微信	N/A	223.99.163.164(山东-济南)	192	1	1	5	2	2	2	2	3	2	1	1	6	6	6	6	6	6	6	6	6	6	6	6	6	6	6	6	6	6	6	6	6	6	6	6	6	6	6	6	6	6	6	6
1466	2026/4/7 19:21:34	133秒	微信	N/A	112.224.218.8(山东-济南)	153	1	3	1	1	4	1	1	2	2	1	4	6	1	6	6	6	6	6	6	6	6	6	6	6	5	5	6	6	7	6	1	6	2	2	2	4	4	4	4	4	4	4	4
1467	2026/4/7 19:21:52	89秒	微信	N/A	223.104.194.132(山东-济南)	83	2	1	5	2	4	1	3	4	2	1	1	2	3	3	3	2	2	2	2	3	3	3	3	2	2	2	2	3	3	3	3	2	2	3	3	3	3	2	2	3	3	3	3
1468	2026/4/7 19:21:53	225秒	微信	N/A	39.144.109.167(山东-聊城)	87	2	1	3	2	3	1	1	3	1	1	4	4	2	2	6	2	2	4	2	3	4	3	2	5	5	4	4	4	3	5	2	2	3	2	2	1	1	1	1	2	1	2	1
1469	2026/4/7 19:22:00	62秒	微信	N/A	223.104.194.154(山东-济南)	128	2	2	3	1	2	3	3	2	1	1	3	4	4	4	4	4	4	4	4	4	4	4	4	4	4	4	4	4	4	4	4	4	4	4	4	4	4	4	4	4	4	4	4
1470	2026/4/7 19:22:09	282秒	微信	N/A	124.128.168.99(山东-济南)	130	2	4	3	2	2	1	1	1	2	2	1	7	3	3	5	4	3	3	5	5	5	3	3	3	3	4	5	5	6	4	4	3	6	3	3	3	3	4	3	4	5	5	5
1471	2026/4/7 19:22:10	145秒	微信	N/A	223.104.194.183(山东-济南)	182	2	1	3	2	1	3	3	2	2	1	4	7	6	6	5	7	6	6	6	5	5	5	5	5	6	6	5	5	6	5	6	6	5	6	5	6	5	5	5	6	6	7	7
1472	2026/4/7 19:22:19	131秒	微信	N/A	223.160.165.102(山东-济南)	146	2	1	5	2	4	1	1	4	2	2	4	4	4	4	4	4	4	4	4	4	4	4	4	5	4	5	5	5	5	5	5	5	5	5	5	5	4	5	5	5	5	5	5
1473	2026/4/7 19:22:19	77秒	微信	N/A	223.160.164.153(山东-济南)	96	1	1	3	2	4	1	1	2	1	2	1	3	3	3	3	3	3	3	3	3	3	3	3	3	3	3	3	3	3	3	3	3	3	3	3	3	3	3	3	3	3	3	3
1474	2026/4/7 19:22:44	59秒	微信	N/A	39.144.109.147(山东-聊城)	224	1	3	5	2	4	3	3	1	2	2	2	7	7	7	7	7	7	7	7	7	7	7	7	7	7	7	7	7	7	7	7	7	7	7	7	7	7	7	7	7	7	7	7
1475	2026/4/7 19:22:44	371秒	微信	N/A	39.144.109.169(山东-聊城)	142	2	1	3	2	2	3	2	1	1	1	4	7	5	6	6	4	2	4	4	4	5	4	3	5	6	4	5	5	3	5	4	1	5	5	5	4	4	3	5	4	5	5	5
1476	2026/4/7 19:22:59	52秒	微信	N/A	39.144.109.129(山东-聊城)	224	1	3	5	1	1	1	1	4	1	1	1	7	7	7	7	7	7	7	7	7	7	7	7	7	7	7	7	7	7	7	7	7	7	7	7	7	7	7	7	7	7	7	7
1477	2026/4/7 19:23:04	366秒	微信	N/A	112.96.66.61(广东-广州)	122	2	2	3	2	4	3	2	2	2	3	4	5	3	6	4	3	3	5	2	4	2	2	5	5	4	5	3	6	2	2	1	2	3	4	2	3	3	3	6	6	6	6	6
1478	2026/4/7 19:23:23	65秒	微信	N/A	223.104.194.161(山东-济南)	148	2	2	3	2	3	1	1	1	2	2	4	4	4	4	4	4	4	4	4	4	4	4	4	5	5	5	5	5	5	5	5	5	5	5	5	5	5	5	5	5	5	5	5
1479	2026/4/7 19:23:40	93秒	微信	N/A	124.133.254.248(山东-济南)	128	1	3	1	1	4	2	1	2	2	2	1	4	4	4	4	4	4	4	4	4	4	4	4	4	4	4	4	4	4	4	4	4	4	4	4	4	4	4	4	4	4	4	4
1480	2026/4/7 19:23:43	139秒	微信	N/A	113.127.162.201(山东-济南)	166	2	2	3	2	2	2	3	3	2	2	4	5	3	5	5	5	5	5	5	5	5	5	5	5	5	5	5	6	5	6	5	6	5	6	5	6	5	6	5	6	5	6	5
1481	2026/4/7 19:23:53	124秒	微信	N/A	39.144.108.181(山东-东营)	215	2	1	3	2	2	2	2	2	1	2	1	7	7	7	7	7	7	7	7	7	7	7	7	7	7	7	7	7	7	7	7	7	7	7	7	7	7	7	7	5	4	6	4
1482	2026/4/7 19:23:58	159秒	微信	N/A	112.224.218.29(山东-济南)	83	2	2	3	2	4	1	1	3	2	3	4	2	2	2	2	2	2	2	2	4	2	3	2	2	2	2	3	4	4	4	2	2	3	2	2	3	2	2	4	4	3	4	2
1483	2026/4/7 19:24:01	160秒	微信	N/A	112.224.191.146(山东-济南)	96	1	1	3	2	4	3	1	4	2	2	4	3	3	3	3	3	3	3	3	3	3	3	3	3	3	3	3	3	3	3	3	3	3	3	3	3	3	3	3	3	3	3	3
1484	2026/4/7 19:24:02	346秒	微信	N/A	223.104.194.152(山东-济南)	122	2	2	3	2	4	3	3	1	1	2	1	5	4	2	4	2	2	2	2	2	2	2	2	5	5	4	4	7	3	4	5	4	5	5	5	3	3	3	7	5	4	7	3
1485	2026/4/7 19:24:20	222秒	微信	N/A	223.99.163.166(山东-济南)	141	2	1	5	2	4	1	1	1	1	2	1	7	4	5	5	3	2	2	4	3	5	3	4	7	6	4	6	5	5	5	4	3	4	5	6	4	4	4	4	5	5	5	3
1486	2026/4/7 19:24:23	116秒	微信	N/A	223.104.194.130(山东-济南)	126	1	1	3	2	4	2	2	5	2	2	4	4	4	4	4	4	4	4	4	4	4	3	4	4	3	4	4	6	3	5	4	4	3	4	4	4	4	4	4	4	3	4	4
1487	2026/4/7 19:24:33	80秒	微信	N/A	182.32.7.18(山东-济南)	165	2	4	3	2	4	1	1	1	2	3	1	6	6	6	5	5	5	5	5	5	6	6	5	5	5	5	5	5	5	5	5	5	6	5	5	5	6	5	4	5	5	4	5
1488	2026/4/7 19:24:47	162秒	微信	N/A	39.144.108.15(山东-枣庄)	154	2	1	3	2	2	3	2	1	1	2	4	4	4	4	6	4	4	4	7	7	7	4	2	5	4	4	7	5	4	4	6	4	4	4	5	5	5	2	7	4	4	7	7
1489	2026/4/7 19:25:14	290秒	微信	N/A	223.104.194.135(山东-济南)	134	2	1	3	2	2	2	2	4	2	1	4	4	2	2	5	2	2	2	4	3	5	4	3	5	5	4	4	5	3	6	3	2	4	4	4	4	4	7	7	7	7	7	4
1490	2026/4/7 19:25:17	144秒	微信	N/A	39.144.109.132(山东-聊城)	206	2	2	3	2	4	1	1	3	2	2	1	5	5	5	7	5	5	6	5	5	6	6	7	7	7	7	7	7	7	7	7	6	7	7	7	7	7	7	7	7	7	7	7
1491	2026/4/7 19:25:22	97秒	微信	N/A	112.224.191.146(山东-济南)	224	2	2	2	2	3	3	2	3	2	1	1	7	7	7	7	7	7	7	7	7	7	7	7	7	7	7	7	7	7	7	7	7	7	7	7	7	7	7	7	7	7	7	7
1492	2026/4/7 19:25:24	75秒	微信	N/A	112.7.84.229(山东-烟台)	128	1	4	3	2	2	3	1	5	2	2	2	4	4	4	4	4	4	4	4	4	4	4	4	4	4	4	4	4	4	4	4	4	4	4	4	4	4	4	4	4	4	4	4
1493	2026/4/7 19:25:41	154秒	微信	N/A	144.12.101.8(山东-济南)	127	2	1	3	2	4	1	1	2	2	2	2	7	3	3	4	3	3	3	3	4	4	4	4	4	4	4	4	5	4	4	4	4	4	4	3	3	3	3	5	5	5	5	5
1494	2026/4/7 19:25:43	246秒	微信	N/A	112.224.225.200(山东-济南)	153	2	1	3	2	2	3	3	2	1	1	4	4	4	5	5	5	5	5	5	5	5	5	5	5	4	4	4	5	4	5	4	5	5	5	5	5	5	5	5	5	5	5	5
1495	2026/4/7 19:25:49	351秒	微信	N/A	182.39.68.245(山东-聊城)	123	2	1	2	2	2	1	1	3	2	3	4	4	1	1	4	4	2	2	7	3	4	5	5	3	3	4	4	5	5	5	4	4	5	4	3	5	3	4	6	3	3	6	2
1496	2026/4/7 19:26:08	96秒	微信	N/A	218.68.201.152(天津-天津)	156	2	4	3	2	2	1	1	1	1	2	1	3	3	3	7	5	3	7	5	5	5	5	5	5	5	5	5	5	5	5	5	5	5	5	5	5	5	5	5	5	5	5	5
1497	2026/4/7 19:26:09	62秒	微信	N/A	112.53.79.11(山东-济南)	132	1	3	2	1	4	1	3	2	2	2	1	5	5	5	5	4	4	4	4	4	4	4	4	4	4	4	4	4	4	4	4	4	4	4	4	4	4	4	4	4	4	4	4
1498	2026/4/7 19:26:25	77秒	微信	N/A	223.104.194.189(山东-济南)	143	2	2	5	2	4	1	1	2	1	2	4	5	5	6	5	4	4	4	4	4	4	4	4	4	4	4	4	5	4	5	4	3	5	5	5	4	5	5	5	5	4	5	5
1499	2026/4/7 19:26:25	64秒	微信	N/A	39.144.109.184(山东-聊城)	204	1	3	2	1	4	1	1	5	2	1	1	7	7	7	7	7	7	7	7	7	7	7	7	7	7	7	7	7	7	7	5	5	6	5	6	5	6	5	6	5	6	5	6
1500	2026/4/7 19:26:26	62秒	微信	N/A	112.53.79.14(山东-济南)	120	2	2	3	2	4	1	1	1	1	1	1	3	3	3	3	3	3	3	3	3	3	3	3	4	5	4	3	3	4	4	3	4	3	5	4	5	4	6	6	5	4	5	3
1501	2026/4/7 19:26:29	399秒	微信	N/A	112.53.79.11(山东-济南)	177	2	1	5	2	3	1	1	2	1	2	1	7	5	5	7	5	4	5	5	5	5	5	5	7	6	7	6	7	6	5	5	3	4	5	6	5	5	6	7	6	6	7	5
1502	2026/4/7 19:26:31	59秒	微信	N/A	223.104.194.170(山东-济南)	160	2	2	3	2	3	1	2	3	1	2	3	5	5	5	5	5	5	5	5	5	5	5	5	5	5	5	5	5	5	5	5	5	5	5	5	5	5	5	5	5	5	5	5
1503	2026/4/7 19:26:32	59秒	微信	N/A	112.224.219.103(山东-济南)	170	2	2	3	2	4	2	2	3	2	1	1	6	6	6	6	5	5	5	5	6	6	6	6	6	6	5	5	5	5	5	5	5	5	5	5	5	5	5	5	5	5	5	5
1504	2026/4/7 19:26:36	91秒	微信	N/A	112.224.224.11(山东-济南)	98	2	2	3	2	4	1	1	3	2	1	1	5	4	4	3	2	2	3	3	3	3	3	3	3	3	3	3	3	3	3	3	3	3	3	3	3	3	3	3	3	3	3	3
1505	2026/4/7 19:26:38	75秒	微信	N/A	223.104.194.143(山东-济南)	167	2	2	3	2	3	2	1	2	1	2	4	5	6	6	5	6	5	6	4	6	5	6	5	5	5	4	5	6	5	6	5	5	5	6	5	5	4	5	6	5	5	5	5
1506	2026/4/7 19:26:39	67秒	微信	N/A	112.232.141.108(山东-济南)	192	2	2	3	2	2	3	2	3	2	1	1	6	6	6	6	6	6	6	6	6	6	6	6	6	6	6	6	6	6	6	6	6	6	6	6	6	6	6	6	6	6	6	6
1507	2026/4/7 19:26:48	72秒	微信	N/A	223.98.210.111(山东-临沂)	160	2	4	3	2	2	3	3	1	2	1	3	5	5	5	5	5	5	5	5	5	5	5	5	5	5	5	5	5	5	5	5	5	5	5	5	5	5	5	5	5	5	5	5
1508	2026/4/7 19:27:11	75秒	微信	N/A	112.36.57.96(山东-德州)	224	1	2	3	2	4	1	1	5	1	1	3	7	7	7	7	7	7	7	7	7	7	7	7	7	7	7	7	7	7	7	7	7	7	7	7	7	7	7	7	7	7	7	7
1509	2026/4/7 19:27:24	87秒	微信	N/A	112.224.225.154(山东-济南)	112	2	2	5	2	3	1	1	2	1	2	1	4	4	4	4	4	4	4	4	4	4	4	4	4	4	4	4	3	3	3	3	3	3	3	3	3	3	3	3	3	3	3	3
1510	2026/4/7 19:27:28	80秒	微信	N/A	112.224.160.152(山东-济南)	128	2	2	3	2	3	1	1	1	2	2	2	4	4	4	4	4	4	4	4	4	4	4	4	4	4	4	4	4	4	4	4	4	4	4	4	4	4	4	4	4	4	4	4
1511	2026/4/7 19:27:29	54秒	微信	N/A	112.53.79.11(山东-济南)	128	1	3	2	1	4	1	3	2	2	2	1	4	4	4	4	4	4	4	4	4	4	4	4	4	4	4	4	4	4	4	4	4	4	4	4	4	4	4	4	4	4	4	4
1512	2026/4/7 19:27:31	509秒	微信	N/A	112.224.217.112(山东-济南)	160	2	2	3	2	2	2	2	2	2	2	4	5	5	5	5	5	5	5	5	5	5	5	5	5	5	5	5	5	5	5	5	5	5	5	5	5	5	5	5	5	5	5	5
1513	2026/4/7 19:27:43	95秒	微信	N/A	39.144.109.179(山东-聊城)	211	2	2	5	2	4	1	1	5	2	2	1	7	7	7	7	7	7	7	7	7	7	7	7	7	7	7	7	7	7	7	7	7	7	7	7	7	5	6	5	5	5	5	5
1514	2026/4/7 19:27:48	75秒	微信	N/A	223.104.194.139(山东-济南)	186	2	2	3	2	4	1	1	2	2	2	1	5	5	4	4	6	6	6	6	6	6	6	6	6	6	6	6	6	6	6	6	6	6	6	6	6	6	6	6	6	6	6	6
1515	2026/4/7 19:27:51	106秒	微信	N/A	39.144.109.153(山东-聊城)	128	2	2	5	2	2	2	2	2	2	2	1	4	4	4	4	4	4	4	4	4	4	4	4	4	4	4	4	4	4	4	4	4	4	4	4	4	4	4	4	4	4	4	4
1516	2026/4/7 19:27:54	104秒	微信	N/A	123.233.72.134(山东-济南)	125	2	2	3	2	4	3	2	1	1	1	3	4	4	3	2	2	2	3	2	2	2	2	2	3	3	3	3	6	6	6	6	5	4	5	5	5	5	5	5	5	5	5	5
1517	2026/4/7 19:28:00	247秒	微信	N/A	112.224.191.34(山东-济南)	158	2	1	3	2	2	2	2	1	1	1	4	6	6	6	6	4	4	2	4	7	6	4	4	4	5	5	5	7	6	6	4	2	6	6	6	3	2	2	6	6	6	6	6
1518	2026/4/7 19:28:05	995秒	微信	N/A	112.224.191.174(山东-济南)	192	2	2	3	2	3	2	2	3	1	1	1	6	6	6	6	6	6	6	6	6	6	6	6	6	6	6	6	6	6	6	6	6	6	6	6	6	6	6	6	6	6	6	6
1519	2026/4/7 19:28:10	165秒	微信	N/A	153.119.52.119(山东-济南)	128	2	2	5	2	4	1	1	3	2	1	1	4	4	4	4	4	4	4	4	4	4	4	4	4	4	4	4	4	4	4	4	4	4	4	4	4	4	4	4	4	4	4	4
1520	2026/4/7 19:28:12	120秒	微信	N/A	112.224.227.148(山东-济南)	154	2	4	3	2	4	1	1	3	1	3	2	5	5	5	5	4	5	5	4	4	5	5	4	5	4	5	4	5	5	5	4	5	4	5	5	5	5	5	5	5	6	5	6
1521	2026/4/7 19:28:19	140秒	微信	N/A	223.104.194.178(山东-济南)	139	2	2	3	2	2	3	3	1	1	1	4	3	2	3	6	4	4	4	3	5	5	3	5	5	2	3	4	7	7	7	4	2	7	2	2	7	4	4	5	5	5	6	4
1522	2026/4/7 19:28:23	241秒	微信	N/A	182.33.211.37(山东-潍坊)	181	2	3	5	1	4	1	1	1	2	1	1	7	5	7	7	6	6	7	6	6	7	6	5	5	5	5	6	7	6	6	5	2	7	7	5	5	3	3	6	7	6	7	3
1523	2026/4/7 19:28:29	55秒	微信	N/A	218.58.41.26(山东-济南)	152	1	3	2	1	3	3	3	4	2	3	4	4	4	4	4	5	5	5	5	5	5	5	5	4	5	4	4	5	5	4	5	5	5	5	5	5	5	5	5	5	5	5	5
1524	2026/4/7 19:28:38	49秒	微信	N/A	112.53.79.11(山东-济南)	128	1	3	2	1	4	1	3	2	2	2	1	4	4	4	4	4	4	4	4	4	4	4	4	4	4	4	4	4	4	4	4	4	4	4	4	4	4	4	4	4	4	4	4
1525	2026/4/7 19:29:00	50秒	微信	N/A	112.224.218.33(山东-济南)	126	2	3	2	1	2	3	2	4	2	3	1	5	4	5	5	5	4	5	5	5	5	4	4	5	4	4	3	4	3	4	4	4	3	4	4	3	3	3	3	3	3	3	3
1526	2026/4/7 19:29:03	87秒	微信	N/A	112.230.183.12(山东-济南)	96	1	3	2	1	4	1	1	5	2	3	4	3	1	3	5	3	3	3	3	3	3	3	3	3	3	3	3	3	3	3	3	3	3	3	3	3	3	3	3	3	3	3	3
1527	2026/4/7 19:29:18	599秒	微信	N/A	223.104.194.154(山东-济南)	134	2	1	3	2	3	1	1	2	1	1	1	5	4	5	7	3	3	6	6	2	5	2	2	5	6	3	4	5	3	3	4	4	5	5	6	2	2	2	4	6	5	5	5
1528	2026/4/7 19:29:34	105秒	微信	N/A	112.224.224.226(山东-济南)	192	2	3	5	2	4	2	1	3	1	1	1	6	6	6	6	6	6	6	6	6	6	6	6	6	6	6	6	6	6	6	6	6	6	6	6	6	6	6	6	6	6	6	6
1529	2026/4/7 19:29:41	86秒	微信	N/A	112.53.79.11(山东-济南)	224	1	2	3	2	2	2	1	2	1	1	1	7	7	7	7	7	7	7	7	7	7	7	7	7	7	7	7	7	7	7	7	7	7	7	7	7	7	7	7	7	7	7	7
1530	2026/4/7 19:29:58	108秒	微信	N/A	144.12.200.167(山东-滨州)	224	2	1	3	2	2	1	2	2	2	2	3	7	7	7	7	7	7	7	7	7	7	7	7	7	7	7	7	7	7	7	7	7	7	7	7	7	7	7	7	7	7	7	7
1531	2026/4/7 19:30:17	100秒	微信	N/A	119.178.109.32(山东-聊城)	102	2	4	3	2	3	1	1	4	2	3	2	5	5	4	4	3	3	3	3	3	3	3	3	3	3	3	3	3	3	3	3	3	3	3	3	3	3	3	3	3	3	3	3
1532	2026/4/7 19:31:05	104秒	微信	N/A	112.53.79.11(山东-济南)	190	2	3	2	1	4	1	1	5	2	3	4	7	3	6	6	6	6	6	6	6	6	6	6	6	6	6	6	6	6	6	6	6	6	6	6	6	6	6	6	6	6	6	6
1533	2026/4/7 19:31:32	127秒	微信	N/A	112.224.2.2(山东-济南)	131	2	2	5	2	4	1	1	2	2	1	1	7	7	4	4	4	3	3	3	4	4	4	4	4	4	4	4	4	4	4	4	4	4	4	4	4	4	4	4	4	4	4	4
1534	2026/4/7 19:31:35	113秒	微信	N/A	223.99.163.166(山东-济南)	163	2	2	3	2	2	3	2	2	2	1	4	6	4	6	6	6	6	6	6	6	6	6	6	5	5	5	5	5	5	5	4	5	5	3	3	5	5	5	5	4	4	5	5
1535	2026/4/7 19:31:37	66秒	微信	N/A	123.235.243.12(山东-青岛)	95	2	3	2	1	1	2	2	3	2	3	1	3	1	1	1	1	1	1	1	1	1	1	1	4	5	4	4	4	4	4	4	4	4	4	4	4	4	4	4	4	4	4	4
1536	2026/4/7 19:32:28	754秒	微信	N/A	223.99.163.164(山东-济南)	145	2	1	3	2	4	1	1	2	1	2	1	3	1	4	7	4	2	3	4	4	5	3	6	7	6	6	5	4	3	6	5	4	3	5	4	5	7	5	7	5	4	4	4
1537	2026/4/7 19:32:38	212秒	微信	N/A	223.99.163.164(山东-济南)	90	2	2	3	2	4	1	1	4	2	3	1	7	5	3	3	2	2	2	2	4	2	2	2	2	3	2	2	5	2	4	2	2	2	2	2	4	3	3	4	2	2	4	2
1538	2026/4/7 19:32:41	84秒	微信	N/A	112.224.190.251(山东-济南)	97	1	2	3	2	4	1	1	4	2	2	1	3	3	4	3	3	3	3	3	3	3	3	3	3	3	3	3	3	3	3	3	3	3	3	3	3	3	3	3	3	3	3	3
1539	2026/4/7 19:32:42	173秒	微信	N/A	39.144.81.81(天津-天津)	162	2	2	3	2	2	2	3	1	1	2	3	4	5	5	6	6	6	6	5	4	4	4	6	5	4	5	5	6	4	5	6	3	4	5	5	6	6	6	6	6	4	5	5
1540	2026/4/7 19:32:46	43秒	微信	N/A	223.104.194.138(山东-济南)	159	2	4	3	1	2	1	3	1	2	2	3	4	5	5	5	5	5	5	5	5	5	5	5	5	5	5	5	5	5	5	5	5	5	5	5	5	5	5	5	5	5	5	5
1541	2026/4/7 19:33:08	148秒	微信	N/A	124.134.30.161(山东-淄博)	152	2	4	3	2	4	1	1	1	2	2	2	6	5	5	6	6	5	4	4	5	5	4	5	4	6	4	4	6	5	5	4	3	5	4	3	5	4	4	6	5	5	6	4
1542	2026/4/7 19:33:26	71秒	微信	N/A	39.144.109.177(山东-聊城)	224	2	3	2	1	4	2	1	5	1	2	4	7	7	7	7	7	7	7	7	7	7	7	7	7	7	7	7	7	7	7	7	7	7	7	7	7	7	7	7	7	7	7	7
1543	2026/4/7 19:33:51	126秒	微信	N/A	112.224.191.202(山东-济南)	125	1	1	3	2	2	2	1	2	2	1	2	4	4	4	5	3	3	3	3	3	3	3	4	4	3	3	4	5	4	4	4	4	4	4	4	5	4	5	6	4	3	5	4
1544	2026/4/7 19:34:49	82秒	微信	N/A	183.191.184.204(山西-太原)	200	2	4	3	2	1	3	3	3	2	3	2	1	1	1	1	7	7	7	7	7	7	7	7	7	7	7	7	7	7	7	7	7	7	7	7	7	7	7	7	7	7	7	7
1545	2026/4/7 19:35:00	83秒	微信	N/A	112.224.228.168(山东-济南)	192	1	3	1	2	2	2	1	2	2	1	1	6	6	6	6	6	6	6	6	6	6	6	6	6	6	6	6	6	6	6	6	6	6	6	6	6	6	6	6	6	6	6	6
1546	2026/4/7 19:35:01	102秒	微信	N/A	112.242.151.222(山东-德州)	120	1	4	3	2	4	1	1	3	1	2	3	4	4	4	4	4	4	4	4	4	4	4	4	4	4	4	4	4	4	4	4	4	4	4	4	3	3	3	3	3	3	3	3
1547	2026/4/7 19:37:03	63秒	微信	N/A	112.224.219.48(山东-济南)	224	2	2	2	1	1	2	1	5	2	3	1	7	7	7	7	7	7	7	7	7	7	7	7	7	7	7	7	7	7	7	7	7	7	7	7	7	7	7	7	7	7	7	7
1548	2026/4/7 19:37:08	102秒	微信	N/A	112.224.219.119(山东-济南)	192	2	1	3	2	2	2	3	1	1	2	4	7	3	7	7	7	7	7	7	7	7	7	7	5	5	5	5	7	3	4	4	5	7	5	5	7	7	7	7	7	5	5	7
1549	2026/4/7 19:38:04	222秒	微信	N/A	223.99.163.166(山东-济南)	205	2	1	3	2	4	2	2	3	1	1	2	7	7	7	7	7	7	7	7	7	7	7	7	6	6	7	6	6	6	6	6	6	6	6	6	6	6	6	6	6	6	6	6
1550	2026/4/7 19:38:04	71秒	微信	N/A	123.123.43.2(北京-北京)	128	1	4	2	1	4	3	2	3	2	2	1	4	4	4	4	4	4	4	4	4	4	4	4	4	4	4	4	4	4	4	4	4	4	4	4	4	4	4	4	4	4	4	4
1551	2026/4/7 19:39:31	214秒	微信	N/A	112.53.79.14(山东-济南)	160	2	4	3	2	4	1	1	3	1	2	2	4	3	6	6	4	3	5	5	4	4	3	5	5	4	4	5	6	5	6	7	4	4	5	4	6	6	6	6	6	6	7	6
1552	2026/4/7 19:39:32	136秒	微信	N/A	112.53.79.14(山东-济南)	211	2	1	2	1	4	1	1	3	2	1	1	7	7	7	7	7	7	7	7	6	7	6	6	7	6	7	6	6	7	6	7	6	7	6	7	6	7	6	7	7	6	7	6
1553	2026/4/7 19:39:38	120秒	微信	N/A	223.104.194.133(山东-济南)	224	2	1	3	2	4	1	1	3	2	1	1	7	7	7	7	7	7	7	7	7	7	7	7	7	7	7	7	7	7	7	7	7	7	7	7	7	7	7	7	7	7	7	7
1554	2026/4/7 19:39:42	133秒	微信	N/A	1.206.178.120(贵州-黔南)	143	1	4	3	2	4	1	1	2	1	1	1	4	4	4	4	5	4	4	4	5	4	4	4	5	4	5	5	5	4	5	5	5	5	4	5	5	4	5	4	5	4	5	4
1555	2026/4/7 19:39:49	112秒	微信	N/A	112.224.221.182(山东-济南)	186	2	3	2	1	4	2	1	2	2	3	3	6	6	5	6	6	5	5	6	6	6	6	6	6	6	6	6	6	6	6	6	6	6	6	6	6	6	6	6	5	5	6	5
1556	2026/4/7 19:40:47	98秒	微信	N/A	112.224.228.71(山东-济南)	134	2	2	2	1	4	1	1	2	1	2	1	3	3	3	3	4	4	4	4	3	3	3	4	4	3	3	3	3	3	3	3	6	5	5	5	6	6	6	5	6	6	6	6
1557	2026/4/7 19:41:11	257秒	微信	N/A	39.144.108.111(山东-枣庄)	133	2	4	3	2	2	2	1	3	2	1	2	6	4	4	5	5	5	5	5	6	6	4	6	5	4	4	4	5	5	5	3	3	4	2	4	1	1	1	3	4	5	4	5
1558	2026/4/7 19:41:23	124秒	微信	N/A	223.104.250.78(重庆-重庆)	224	2	4	3	2	2	3	3	1	1	1	3	7	7	7	7	7	7	7	7	7	7	7	7	7	7	7	7	7	7	7	7	7	7	7	7	7	7	7	7	7	7	7	7
1559	2026/4/7 19:41:30	97秒	微信	N/A	39.144.109.134(山东-聊城)	160	2	2	2	1	4	1	1	3	2	2	1	5	5	5	5	5	5	5	5	5	5	5	5	5	5	5	5	5	5	5	5	5	5	5	5	5	5	5	5	5	5	5	5
1560	2026/4/7 19:42:20	209秒	微信	N/A	223.99.163.165(山东-济南)	110	2	2	2	1	2	3	1	4	2	2	1	3	3	5	5	5	5	5	5	3	3	3	3	3	3	3	3	4	3	3	3	4	3	3	3	3	3	3	3	3	3	3	3
1561	2026/4/7 19:42:27	67秒	微信	N/A	223.104.194.159(山东-济南)	192	2	2	5	1	4	1	1	2	2	1	1	7	7	7	7	7	7	7	7	7	7	7	7	5	5	5	5	5	5	5	5	5	5	5	5	6	6	6	6	6	6	6	6
1562	2026/4/7 19:42:48	95秒	微信	N/A	116.130.208.193(天津-天津)	85	2	2	3	2	1	1	2	5	2	3	1	2	2	2	2	2	2	2	2	2	2	2	2	3	3	3	3	3	3	3	3	3	3	3	4	3	3	3	3	3	3	3	3
1563	2026/4/7 19:43:10	76秒	微信	N/A	223.104.194.157(山东-济南)	129	2	2	2	1	3	2	2	2	2	3	3	4	4	4	5	4	4	4	4	4	4	4	4	4	4	4	4	4	4	4	4	4	4	4	4	4	4	4	4	4	4	4	4
1564	2026/4/7 19:43:20	318秒	微信	N/A	223.104.195.245(山东-泰安)	147	2	2	3	2	3	3	2	4	2	1	3	6	5	5	5	5	5	5	5	5	5	5	5	4	4	4	5	5	4	4	4	4	5	4	4	4	4	4	4	5	5	5	4
1565	2026/4/7 19:44:43	59秒	微信	N/A	223.160.165.201(山东-济南)	32	2	4	3	2	4	3	3	4	2	3	2	1	1	1	1	1	1	1	1	1	1	1	1	1	1	1	1	1	1	1	1	1	1	1	1	1	1	1	1	1	1	1	1
1566	2026/4/7 19:45:13	217秒	微信	N/A	39.144.111.49(山东-济南)	195	2	3	5	1	3	1	1	5	2	2	1	6	7	7	7	7	7	7	7	5	5	5	5	6	6	6	6	6	6	6	6	6	6	6	6	6	6	6	6	6	6	6	6
1567	2026/4/7 19:45:17	74秒	微信	N/A	39.85.96.79(山东-泰安)	175	2	4	5	2	1	3	3	3	2	1	1	5	5	5	5	5	5	5	5	5	5	5	5	5	5	5	5	5	6	6	6	6	6	6	6	6	6	6	6	6	6	6	6
1568	2026/4/7 19:45:18	96秒	微信	N/A	112.232.212.180(山东-济南)	176	2	4	3	2	4	1	1	2	2	1	1	6	7	6	6	4	7	4	6	6	5	5	6	5	6	5	6	5	6	5	6	5	6	5	6	5	6	4	6	5	6	5	5
1569	2026/4/7 19:45:32	229秒	微信	N/A	112.230.183.194(山东-济南)	181	1	1	2	1	4	1	1	1	1	1	1	7	3	5	7	4	7	5	5	5	5	5	5	5	5	5	5	7	5	5	5	7	7	7	7	6	6	6	6	6	6	6	6
1570	2026/4/7 19:45:54	88秒	微信	N/A	39.144.109.129(山东-聊城)	212	2	4	3	2	2	1	1	1	1	3	1	6	6	6	6	6	6	6	6	6	6	7	7	7	7	7	7	7	5	7	7	7	7	7	7	7	7	7	7	7	7	7	7
1571	2026/4/7 19:46:00	137秒	微信	N/A	124.133.167.59(山东-济南)	224	2	4	2	2	4	1	1	3	2	3	1	7	7	7	7	7	7	7	7	7	7	7	7	7	7	7	7	7	7	7	7	7	7	7	7	7	7	7	7	7	7	7	7
1572	2026/4/7 19:46:03	143秒	微信	N/A	123.134.104.243(山东-济南)	134	2	4	2	2	4	1	1	4	2	3	3	4	4	4	5	4	4	5	5	4	4	5	3	5	3	5	5	5	5	2	3	3	4	3	7	4	4	4	6	4	3	4	4
1573	2026/4/7 19:46:25	53秒	微信	N/A	144.12.200.36(山东-滨州)	161	1	3	2	1	2	3	3	3	2	3	2	6	5	5	5	5	5	5	5	5	5	5	5	4	5	5	5	6	5	5	5	5	5	5	5	5	5	5	5	5	5	5	5
1574	2026/4/7 19:46:35	160秒	微信	N/A	223.104.194.162(山东-济南)	159	1	4	2	2	4	1	1	4	2	1	4	6	5	5	5	4	5	5	5	5	5	5	5	5	6	5	5	6	5	5	5	5	5	5	6	5	5	4	4	4	5	4	5
1575	2026/4/7 19:46:36	123秒	微信	N/A	39.144.109.185(山东-聊城)	105	2	2	3	2	2	4	3	3	1	2	4	5	3	3	5	4	4	3	4	3	3	4	4	4	3	3	3	4	2	4	2	3	3	4	2	3	2	2	3	4	3	3	3
1576	2026/4/7 19:47:07	61秒	微信	N/A	112.53.79.11(山东-济南)	125	2	2	3	2	4	1	1	2	1	2	1	3	3	3	4	4	4	4	4	4	4	4	4	4	4	4	4	4	4	4	4	4	4	4	4	4	4	4	4	4	4	4	4
1577	2026/4/7 19:48:05	107秒	微信	N/A	223.104.194.158(山东-济南)	192	1	1	3	2	2	3	2	4	1	2	1	6	6	6	6	6	6	6	6	6	6	6	6	6	6	6	6	6	6	6	6	6	6	6	6	6	6	6	6	6	6	6	6
1578	2026/4/7 19:48:07	36秒	微信	N/A	39.144.109.189(山东-聊城)	191	1	1	1	2	2	4	2	4	2	1	1	6	6	6	6	6	6	6	6	6	6	6	6	6	6	6	6	6	6	6	5	6	6	6	6	6	6	6	6	6	6	6	6
1579	2026/4/7 19:48:07	140秒	微信	N/A	39.144.109.161(山东-聊城)	145	2	1	5	2	3	1	1	2	1	1	4	7	2	4	5	4	4	4	4	4	4	4	4	5	3	3	3	7	5	5	4	2	2	4	4	6	6	6	6	6	6	6	6
1580	2026/4/7 19:48:19	55秒	微信	N/A	113.121.197.29(山东-德州)	213	2	4	5	2	4	1	1	1	1	2	1	7	7	7	7	7	7	7	7	7	7	7	7	7	7	7	7	7	7	7	7	7	7	7	7	6	6	6	6	6	5	4	6
1581	2026/4/7 19:48:40	110秒	微信	N/A	39.144.109.190(山东-聊城)	128	1	1	5	2	1	1	1	5	2	3	4	4	4	4	4	4	4	4	4	4	4	4	4	4	4	4	4	4	4	4	4	4	4	4	4	4	4	4	4	4	4	4	4
1582	2026/4/7 19:48:55	135秒	微信	N/A	39.144.109.138(山东-聊城)	162	2	2	3	2	4	1	1	1	2	2	1	1	2	2	5	6	6	6	4	4	5	4	6	6	6	6	6	6	4	5	6	1	4	2	3	7	7	7	7	7	7	7	7
1583	2026/4/7 19:48:56	320秒	微信	N/A	223.104.194.161(山东-济南)	161	2	1	3	2	4	2	3	1	1	1	1	5	5	5	5	3	4	4	4	5	5	3	4	6	6	5	4	7	6	3	5	5	6	6	6	5	5	5	4	7	6	6	6
1584	2026/4/7 19:49:02	92秒	微信	N/A	112.38.185.128(山东-济南)	192	2	4	3	2	4	1	1	1	1	2	3	6	6	5	6	7	6	6	6	6	6	6	6	6	6	6	6	6	6	5	7	6	6	6	6	6	6	6	6	6	6	6	6
1585	2026/4/7 19:49:37	225秒	微信	N/A	112.53.79.13(山东-济南)	87	2	1	3	2	2	1	1	2	2	2	1	4	1	2	4	4	4	4	4	1	2	2	2	1	1	1	1	4	1	1	1	1	4	4	4	4	4	7	7	1	1	4	1
1586	2026/4/7 19:49:56	64秒	微信	N/A	39.144.109.183(山东-聊城)	128	1	1	3	2	2	2	1	1	1	1	4	4	4	4	4	4	4	4	4	4	4	4	4	4	4	4	4	4	4	4	4	4	4	4	4	4	4	4	4	4	4	4	4
1587	2026/4/7 19:50:15	232秒	微信	N/A	112.230.183.187(山东-济南)	186	2	1	3	2	4	2	2	3	1	1	1	5	4	5	6	4	6	4	5	4	5	6	7	4	6	4	6	6	5	6	5	7	7	7	7	7	7	7	7	6	7	7	7
1588	2026/4/7 19:50:43	85秒	微信	N/A	144.12.78.113(山东-济南)	128	2	2	3	2	3	1	1	1	1	1	1	4	4	4	4	4	4	4	4	4	4	4	4	4	4	4	4	4	4	4	4	4	4	4	4	4	4	4	4	4	4	4	4
1589	2026/4/7 19:50:46	202秒	微信	N/A	39.144.109.161(山东-聊城)	154	2	4	3	2	2	2	2	3	1	1	1	6	6	6	6	4	4	4	4	5	5	5	5	5	5	5	5	5	4	4	4	4	5	4	5	4	4	6	5	5	5	5	5
1590	2026/4/7 19:50:48	304秒	微信	N/A	39.144.109.128(山东-聊城)	146	1	1	3	2	2	3	3	3	2	1	1	4	3	4	5	4	5	6	5	4	5	5	6	5	6	4	5	5	4	5	5	4	5	4	5	5	4	4	6	4	4	3	3
1591	2026/4/7 19:50:59	65秒	微信	N/A	112.53.79.12(山东-济南)	224	1	1	3	2	3	1	1	1	1	2	1	7	7	7	7	7	7	7	7	7	7	7	7	7	7	7	7	7	7	7	7	7	7	7	7	7	7	7	7	7	7	7	7
1592	2026/4/7 19:51:16	100秒	微信	N/A	112.224.217.224(山东-济南)	112	1	1	1	1	2	3	1	1	1	1	2	3	4	3	4	3	4	3	4	3	4	3	4	3	4	3	4	3	4	3	4	3	4	3	4	3	4	3	4	3	4	3	4
1593	2026/4/7 19:51:26	292秒	微信	N/A	39.144.109.129(山东-聊城)	180	1	3	3	2	4	1	1	3	2	1	1	6	6	6	6	6	6	6	6	6	6	6	6	6	6	6	6	6	6	6	6	5	5	5	5	5	5	5	5	5	5	5	5
1594	2026/4/7 19:51:33	347秒	微信	N/A	112.224.217.250(山东-济南)	131	2	1	3	2	4	1	1	1	1	1	2	7	4	3	6	6	6	6	5	4	4	4	5	4	1	2	5	5	3	3	2	1	6	6	6	3	5	1	5	3	4	3	3
1595	2026/4/7 19:51:37	66秒	微信	N/A	223.99.163.164(山东-济南)	128	1	1	3	2	4	1	1	5	2	3	4	4	4	4	4	4	4	4	4	4	4	4	4	4	4	4	4	4	4	4	4	4	4	4	4	4	4	4	4	4	4	4	4
1596	2026/4/7 19:52:05	218秒	微信	N/A	111.36.168.128(山东-济南)	112	2	2	3	2	4	1	1	3	2	2	1	3	3	3	5	4	5	6	6	4	3	2	3	2	3	3	3	6	3	4	2	2	4	2	4	2	2	2	6	4	4	4	3
1597	2026/4/7 19:52:13	72秒	微信	N/A	39.144.109.156(山东-聊城)	115	1	1	3	2	4	1	1	5	2	2	1	3	3	3	3	3	4	5	2	3	3	5	2	3	3	3	3	4	4	4	4	4	4	4	4	4	4	3	5	4	4	4	4
1598	2026/4/7 19:52:45	909秒	微信	N/A	39.144.109.169(山东-聊城)	121	2	1	3	2	3	2	2	4	2	2	4	7	4	5	6	4	3	4	3	3	4	3	3	3	3	3	4	4	2	4	3	4	4	4	5	3	2	4	4	4	4	4	4
1599	2026/4/7 19:54:48	69秒	微信	N/A	223.104.194.136(山东-济南)	192	1	1	3	2	2	3	3	3	1	1	2	6	6	6	6	6	6	6	6	6	6	6	6	6	6	6	6	6	6	6	6	6	6	6	6	6	6	6	6	6	6	6	6
1600	2026/4/7 19:54:50	83秒	微信	N/A	223.104.194.151(山东-济南)	134	1	1	5	2	4	2	1	2	2	1	1	7	7	4	4	4	4	4	4	4	4	4	4	4	4	4	4	4	4	4	4	4	4	4	4	4	4	4	4	4	4	4	4
1601	2026/4/7 19:55:11	125秒	微信	N/A	112.224.228.229(山东-济南)	162	2	1	3	2	4	2	2	3	1	1	1	5	5	5	5	4	4	4	4	4	4	4	4	4	3	3	3	6	6	6	7	6	6	6	6	6	6	6	6	6	6	6	6
1602	2026/4/7 19:55:28	65秒	微信	N/A	39.144.110.143(山东-临沂)	128	1	1	3	2	2	3	1	5	2	2	1	4	4	4	4	4	4	4	4	4	4	4	4	4	4	4	4	4	4	4	4	4	4	4	4	4	4	4	4	4	4	4	4
1603	2026/4/7 19:56:07	183秒	微信	N/A	112.224.161.228(山东-济南)	158	1	1	3	2	2	1	1	3	2	3	4	7	1	7	4	7	4	4	4	4	4	4	4	4	4	4	4	4	4	4	4	4	4	4	4	7	7	7	7	7	7	7	7
1604	2026/4/7 19:56:15	149秒	微信	N/A	39.144.109.121(山东-聊城)	175	2	4	3	2	2	3	3	3	1	1	3	5	5	5	5	5	5	5	5	5	5	5	5	6	6	6	6	6	6	6	6	6	6	6	6	5	5	5	5	5	6	6	6
1605	2026/4/7 19:59:00	461秒	微信	N/A	112.53.79.12(山东-济南)	128	1	1	3	2	2	3	2	2	1	1	4	4	4	4	4	4	4	4	4	4	4	4	4	4	4	4	4	4	4	4	4	4	4	4	4	4	4	4	4	4	4	4	4
1606	2026/4/7 20:01:31	60秒	微信	N/A	119.185.138.197(山东-东营)	192	1	3	1	1	3	1	2	3	2	3	1	6	6	6	6	6	6	6	6	6	6	6	6	6	6	6	6	6	6	6	6	6	6	6	6	6	6	6	6	6	6	6	6
1607	2026/4/7 20:01:32	406秒	微信	N/A	112.53.79.13(山东-济南)	128	1	1	3	2	2	2	1	3	1	2	4	3	3	3	3	5	5	5	5	4	4	4	4	4	3	4	3	5	3	3	3	3	3	3	3	5	5	5	7	6	4	4	4
1608	2026/4/7 20:01:37	112秒	微信	N/A	112.36.106.190(山东-泰安)	147	2	4	3	2	2	3	1	3	1	2	2	6	6	5	3	5	4	6	6	6	6	6	6	5	6	3	4	5	5	5	5	3	6	3	5	4	3	4	4	3	3	4	2
1609	2026/4/7 20:02:30	70秒	微信	N/A	39.144.109.190(山东-聊城)	220	1	1	1	2	2	2	2	1	2	2	2	7	6	7	7	7	7	7	6	7	7	7	7	6	6	7	7	7	7	7	7	7	7	7	7	7	7	7	7	7	7	7	7
1610	2026/4/7 20:02:34	69秒	微信	N/A	39.144.109.179(山东-聊城)	128	2	3	1	1	2	1	1	1	2	1	1	4	4	4	4	4	4	4	4	4	4	4	4	4	4	4	4	4	4	4	4	4	4	4	4	4	4	4	4	4	4	4	4
1611	2026/4/7 20:02:48	107秒	微信	N/A	223.99.163.166(山东-济南)	211	2	2	3	2	1	2	3	1	1	2	1	7	5	5	7	7	6	7	6	6	7	7	7	7	7	7	7	7	7	7	7	7	7	7	7	5	5	5	7	7	7	7	7
1612	2026/4/7 20:03:07	210秒	微信	N/A	39.144.210.22(甘肃-兰州)	129	2	4	2	2	4	1	1	3	1	1	3	3	4	5	5	2	3	2	4	4	3	5	5	3	3	3	4	5	5	4	4	3	7	3	4	5	4	5	5	5	4	4	4
1613	2026/4/7 20:03:46	130秒	微信	N/A	39.144.109.172(山东-聊城)	111	1	2	2	1	2	2	2	4	2	3	1	4	3	3	2	4	3	4	3	3	4	3	3	3	4	4	3	4	3	4	4	3	4	4	3	3	4	4	3	4	4	3	4
1614	2026/4/7 20:04:01	66秒	微信	N/A	223.104.194.128(山东-济南)	216	2	1	3	1	1	1	1	1	1	1	1	5	5	6	6	7	6	7	6	7	7	7	7	7	7	7	7	7	7	7	7	7	7	7	7	7	7	7	7	7	7	7	7
1615	2026/4/7 20:04:11	63秒	微信	N/A	112.53.79.14(山东-济南)	64	2	3	2	1	2	1	1	1	1	3	1	2	2	2	2	2	2	2	2	2	2	2	2	2	2	2	2	2	2	2	2	2	2	2	2	2	2	2	2	2	2	2	2
1616	2026/4/7 20:04:31	57秒	微信	N/A	112.224.163.100(山东-济南)	140	1	2	5	1	2	2	2	5	2	2	2	5	3	5	4	5	1	4	5	1	5	5	1	6	5	5	1	5	5	5	5	5	7	2	6	5	6	5	2	5	5	5	6
1617	2026/4/7 20:05:07	109秒	微信	N/A	112.224.217.164(山东-济南)	128	2	1	3	2	4	2	2	3	2	3	1	4	4	4	4	4	4	4	4	4	4	4	4	4	4	4	4	4	4	4	4	4	4	4	4	4	4	4	4	4	4	4	4
1618	2026/4/7 20:05:35	70秒	微信	N/A	223.160.164.131(山东-济南)	224	1	3	1	1	1	3	3	2	1	1	1	7	7	7	7	7	7	7	7	7	7	7	7	7	7	7	7	7	7	7	7	7	7	7	7	7	7	7	7	7	7	7	7
1619	2026/4/7 20:06:10	749秒	微信	N/A	223.104.194.143(山东-济南)	224	2	1	3	2	4	1	1	3	2	1	2	7	7	7	7	7	7	7	7	7	7	7	7	7	7	7	7	7	7	7	7	7	7	7	7	7	7	7	7	7	7	7	7
1620	2026/4/7 20:06:27	123秒	微信	N/A	223.104.194.191(山东-济南)	224	1	4	3	2	4	1	1	1	2	2	2	7	7	7	7	7	7	7	7	7	7	7	7	7	7	7	7	7	7	7	7	7	7	7	7	7	7	7	7	7	7	7	7
1621	2026/4/7 20:06:51	92秒	微信	N/A	39.144.109.160(山东-聊城)	128	2	1	3	2	2	3	3	3	2	1	4	4	4	4	4	4	4	4	4	4	4	4	4	4	4	4	4	4	4	4	4	4	4	4	4	4	4	4	4	4	4	4	4
1622	2026/4/7 20:07:00	67秒	微信	N/A	112.232.212.171(山东-济南)	128	1	2	3	2	3	1	1	4	2	2	1	4	4	4	4	4	4	4	4	4	4	4	4	4	4	4	4	4	4	4	4	4	4	4	4	4	4	4	4	4	4	4	4
1623	2026/4/7 20:07:20	83秒	微信	N/A	112.224.227.151(山东-济南)	192	2	1	3	2	2	1	1	1	1	1	1	6	6	6	6	6	6	6	6	6	6	6	6	6	6	6	6	6	6	6	6	6	6	6	6	6	6	6	6	6	6	6	6
1624	2026/4/7 20:10:17	66秒	微信	N/A	223.99.163.166(山东-济南)	128	1	1	2	1	4	1	1	5	2	1	1	4	4	4	4	4	4	4	4	4	4	4	4	4	4	4	4	4	4	4	4	4	4	4	4	4	4	4	4	4	4	4	4
1625	2026/4/7 20:10:29	76秒	微信	N/A	223.104.194.160(山东-济南)	172	2	2	3	2	4	1	1	2	1	1	1	7	7	7	7	7	7	5	4	4	5	6	4	5	5	4	5	6	5	6	4	4	6	4	5	5	6	6	4	6	5	5	6
1626	2026/4/7 20:10:29	108秒	微信	N/A	39.144.109.72(山东-聊城)	172	1	2	2	1	4	1	1	5	2	1	3	6	4	7	5	5	5	5	5	5	6	5	6	5	6	6	6	5	6	5	6	5	5	5	6	5	5	6	6	5	5	5	5
1627	2026/4/7 20:11:59	158秒	微信	N/A	39.144.109.187(山东-聊城)	145	2	1	2	2	2	2	2	3	2	2	1	7	5	6	7	7	7	7	6	4	4	5	5	5	4	5	4	4	3	3	3	3	4	5	5	5	3	3	3	3	3	4	3
1628	2026/4/7 20:12:10	89秒	微信	N/A	39.144.109.170(山东-聊城)	224	2	1	3	2	2	1	1	1	2	1	3	7	7	7	7	7	7	7	7	7	7	7	7	7	7	7	7	7	7	7	7	7	7	7	7	7	7	7	7	7	7	7	7
1629	2026/4/7 20:12:31	173秒	微信	N/A	112.232.212.136(山东-济南)	143	2	1	2	2	1	4	2	1	1	1	1	5	1	4	4	6	6	6	5	4	5	6	6	4	3	4	3	5	4	3	3	3	5	4	4	6	6	6	6	4	3	4	5
1630	2026/4/7 20:12:36	38秒	微信	N/A	112.53.79.12(山东-济南)	87	1	1	3	2	2	2	2	2	2	2	2	1	1	1	1	1	1	1	1	1	1	1	1	1	1	1	1	4	4	4	4	4	7	7	4	3	4	3	5	3	5	5	5
1631	2026/4/7 20:13:34	44秒	微信	N/A	112.53.79.12(山东-济南)	32	1	1	3	1	1	1	1	1	1	1	1	1	1	1	1	1	1	1	1	1	1	1	1	1	1	1	1	1	1	1	1	1	1	1	1	1	1	1	1	1	1	1	1
1632	2026/4/7 20:13:39	81秒	微信	N/A	112.53.79.14(山东-济南)	128	1	1	3	2	2	2	2	5	2	2	4	4	4	4	4	4	4	4	4	4	4	4	4	4	4	4	4	4	4	4	4	4	4	4	4	4	4	4	4	4	4	4	4
1633	2026/4/7 20:15:10	300秒	微信	N/A	223.98.36.173(山东-德州)	167	2	4	3	2	4	1	1	3	2	1	3	5	5	5	5	5	4	6	5	5	5	5	5	5	5	5	5	5	5	5	5	5	5	4	5	7	7	6	7	5	5	6	5
1634	2026/4/7 20:15:14	39秒	微信	N/A	223.104.195.81(山东-泰安)	81	1	2	5	1	4	4	2	3	2	2	1	4	4	4	4	3	3	3	3	2	3	3	3	2	2	2	2	2	2	2	2	2	2	2	2	2	2	2	2	2	2	3	3
1635	2026/4/7 20:16:42	92秒	微信	N/A	223.99.163.166(山东-济南)	128	1	2	2	1	2	1	1	1	1	1	1	4	4	4	4	4	4	4	4	4	4	4	4	4	4	4	4	4	4	4	4	4	4	4	4	4	4	4	4	4	4	4	4
1636	2026/4/7 20:16:48	364秒	微信	N/A	112.224.217.83(山东-济南)	133	1	1	1	1	2	1	1	5	2	1	4	6	4	3	7	4	5	3	6	4	4	4	3	3	5	5	5	5	4	5	3	4	3	2	4	4	4	4	4	4	4	4	4
1637	2026/4/7 20:18:22	68秒	微信	N/A	223.104.194.181(山东-济南)	175	2	1	3	2	4	1	2	1	2	2	1	6	6	5	5	3	5	3	4	5	4	7	6	6	6	6	7	6	5	5	6	5	6	5	6	6	6	6	5	6	7	6	5
1638	2026/4/7 20:19:55	81秒	微信	N/A	223.160.161.233(山东-济南)	128	2	4	3	2	1	2	2	2	2	1	4	4	4	4	4	4	4	4	4	4	4	4	4	4	4	4	4	4	4	4	4	4	4	4	4	4	4	4	4	4	4	4	4
1639	2026/4/7 20:21:05	43秒	微信	N/A	223.160.161.250(山东-济南)	224	2	1	2	2	1	1	1	1	1	1	1	7	7	7	7	7	7	7	7	7	7	7	7	7	7	7	7	7	7	7	7	7	7	7	7	7	7	7	7	7	7	7	7
1640	2026/4/7 20:21:05	121秒	微信	N/A	39.144.109.182(山东-聊城)	178	2	1	2	1	2	2	3	1	1	1	1	6	5	6	6	6	6	6	4	4	4	6	7	6	6	6	6	6	6	6	6	4	6	6	6	5	5	5	6	5	5	6	5
1641	2026/4/7 20:22:14	88秒	微信	N/A	39.144.109.158(山东-聊城)	160	2	1	3	2	4	1	1	3	2	2	2	4	4	4	4	5	5	5	5	5	5	5	5	5	5	5	5	5	5	5	5	5	5	5	5	6	6	6	6	5	5	5	5
1642	2026/4/7 20:22:26	115秒	微信	N/A	112.224.191.108(山东-济南)	64	2	2	2	1	2	2	1	1	1	1	1	2	2	2	2	2	2	2	2	2	2	2	2	2	2	2	2	2	2	2	2	2	2	2	2	2	2	2	2	2	2	2	2
1643	2026/4/7 20:22:28	78秒	微信	N/A	123.168.237.85(山东-潍坊)	224	2	4	2	2	3	2	2	4	2	2	3	7	7	7	7	7	7	7	7	7	7	7	7	7	7	7	7	7	7	7	7	7	7	7	7	7	7	7	7	7	7	7	7
1644	2026/4/7 20:22:30	137秒	微信	N/A	223.104.194.143(山东-济南)	101	1	1	2	2	4	1	1	3	1	1	1	3	3	3	3	4	3	4	3	3	3	4	4	2	2	3	2	4	3	2	2	2	2	2	2	3	4	7	7	3	3	3	3
1645	2026/4/7 20:22:31	142秒	微信	N/A	223.104.194.171(山东-济南)	155	2	1	3	2	2	3	3	3	2	1	4	5	6	5	7	4	4	4	4	6	5	6	6	4	4	4	4	7	7	7	7	3	5	4	5	4	4	4	4	4	4	4	4
1646	2026/4/7 20:22:58	545秒	微信	N/A	182.39.205.177(山东-枣庄)	174	1	1	3	2	2	2	2	5	2	2	1	5	4	6	7	7	7	7	7	7	6	5	5	7	7	7	5	5	5	6	5	3	3	7	4	4	4	4	7	4	5	5	4
1647	2026/4/7 20:23:11	135秒	微信	N/A	112.224.227.35(山东-济南)	125	1	1	3	2	1	1	2	4	2	1	1	5	3	5	4	4	4	3	4	5	3	5	4	5	4	5	4	3	4	3	3	4	5	4	3	4	3	4	3	3	3	5	4
1648	2026/4/7 20:23:38	118秒	微信	N/A	223.104.194.190(山东-济南)	148	2	1	5	2	4	1	1	2	2	1	1	5	4	5	4	2	3	2	3	5	6	4	5	6	5	5	6	5	6	6	3	4	5	6	4	5	4	6	4	4	5	6	5
1649	2026/4/7 20:24:39	86秒	微信	N/A	223.104.194.137(山东-济南)	128	1	1	1	1	3	1	1	3	2	2	4	4	4	4	4	4	4	4	4	4	4	4	4	4	4	4	4	4	4	4	4	4	4	4	4	4	4	4	4	4	4	4	4
1650	2026/4/7 20:24:40	113秒	微信	N/A	39.144.108.233(山东-东营)	130	2	1	2	1	2	2	1	5	2	3	2	6	4	2	7	7	7	7	7	3	4	4	4	7	7	4	5	4	4	4	4	4	4	4	4	1	1	1	6	1	1	1	1
1651	2026/4/7 20:25:01	59秒	微信	N/A	112.224.191.55(山东-济南)	224	1	1	2	2	1	1	1	4	2	3	4	7	7	7	7	7	7	7	7	7	7	7	7	7	7	7	7	7	7	7	7	7	7	7	7	7	7	7	7	7	7	7	7
1652	2026/4/7 20:27:26	80秒	微信	N/A	223.99.163.165(山东-济南)	96	1	1	3	2	4	1	1	1	1	1	4	3	3	3	3	3	3	3	3	3	3	3	3	3	3	3	3	3	3	3	3	3	3	3	3	3	3	3	3	3	3	3	3
1653	2026/4/7 20:27:44	202秒	微信	N/A	39.144.109.188(山东-聊城)	121	2	1	3	2	4	2	2	1	2	2	4	3	3	2	5	3	2	5	3	3	4	3	4	4	4	6	6	3	3	3	3	4	5	4	5	4	3	3	5	3	5	5	3
1654	2026/4/7 20:28:10	178秒	微信	N/A	39.144.109.148(山东-聊城)	115	2	1	5	2	2	2	2	4	1	1	1	5	5	4	5	4	3	4	3	3	5	6	6	4	3	3	3	5	3	3	2	2	3	2	2	3	3	3	3	3	4	4	4
1655	2026/4/7 20:28:52	1161秒	微信	N/A	223.104.194.146(山东-济南)	131	2	1	2	2	2	2	2	1	2	1	4	5	5	4	5	3	3	4	3	6	4	4	4	4	5	4	3	4	4	3	5	4	5	5	5	4	4	4	4	3	4	4	3
1656	2026/4/7 20:29:34	111秒	微信	N/A	112.224.219.163(山东-济南)	203	1	3	3	1	2	2	1	1	1	1	3	7	7	7	4	4	6	6	6	7	7	7	7	7	7	7	7	7	7	7	7	7	7	7	7	4	4	4	4	7	7	7	7
1657	2026/4/7 20:29:48	208秒	微信	N/A	39.144.109.155(山东-聊城)	104	2	1	3	2	3	1	1	3	2	1	1	4	3	3	3	4	3	3	3	3	3	3	3	3	3	3	4	4	3	4	3	1	2	2	2	4	4	4	4	4	4	4	4
1658	2026/4/7 20:31:47	79秒	微信	N/A	39.144.109.150(山东-聊城)	224	2	1	3	2	4	2	1	1	2	1	4	7	7	7	7	7	7	7	7	7	7	7	7	7	7	7	7	7	7	7	7	7	7	7	7	7	7	7	7	7	7	7	7
1659	2026/4/7 20:31:56	84秒	微信	N/A	39.144.109.147(山东-聊城)	131	2	1	3	2	2	2	2	3	1	2	4	4	3	4	4	4	4	4	4	4	4	4	4	4	4	4	4	4	4	4	4	4	4	4	4	4	4	4	4	5	5	5	5
1660	2026/4/7 20:32:24	121秒	微信	N/A	112.224.162.187(山东-济南)	130	2	1	3	2	3	1	1	3	2	3	4	5	3	4	5	4	4	5	4	4	4	4	4	4	4	4	4	4	4	4	4	4	4	4	4	4	4	4	4	4	4	4	4
1661	2026/4/7 20:32:52	114秒	微信	N/A	39.144.109.148(山东-聊城)	129	2	1	3	2	4	3	1	2	2	1	4	3	2	4	6	4	4	5	4	4	4	4	4	4	4	4	4	5	4	4	4	4	4	4	4	4	4	4	4	4	4	4	4
1662	2026/4/7 20:32:52	107秒	微信	N/A	112.53.79.12(山东-济南)	198	2	4	2	2	4	1	2	1	2	1	1	7	6	6	7	7	6	6	6	7	7	6	3	3	7	7	7	7	4	7	5	4	7	5	7	7	7	7	7	7	7	5	7
1663	2026/4/7 20:33:40	86秒	微信	N/A	112.232.59.168(山东-济南)	162	2	4	2	2	2	3	2	4	1	1	1	6	6	6	6	6	5	4	4	6	6	6	6	5	4	4	5	5	5	5	4	4	4	4	6	5	5	5	5	5	5	5	5
1664	2026/4/7 20:35:03	174秒	微信	N/A	223.99.163.164(山东-济南)	120	2	1	3	2	2	2	2	2	2	1	2	3	2	2	4	3	3	4	4	3	3	3	3	4	4	4	4	5	5	5	5	3	4	3	4	4	3	3	4	5	5	5	4
1665	2026/4/7 20:37:11	122秒	微信	N/A	223.104.194.134(山东-济南)	224	1	1	1	1	4	1	1	3	2	1	4	7	7	7	7	7	7	7	7	7	7	7	7	7	7	7	7	7	7	7	7	7	7	7	7	7	7	7	7	7	7	7	7
1666	2026/4/7 20:37:43	105秒	微信	N/A	223.104.194.172(山东-济南)	75	2	1	2	2	4	1	1	4	2	2	1	1	1	6	6	2	2	7	2	2	2	2	2	2	2	2	2	2	2	2	2	2	2	2	2	2	2	2	2	2	2	2	2
1667	2026/4/7 20:37:46	108秒	微信	N/A	223.160.164.213(山东-济南)	128	1	1	3	2	2	1	2	4	2	2	1	4	4	4	4	4	4	4	4	4	4	4	4	4	4	4	4	4	4	4	4	4	4	4	4	4	4	4	4	4	4	4	4
1668	2026/4/7 20:39:31	97秒	微信	N/A	39.144.109.191(山东-聊城)	117	1	1	1	1	4	2	2	4	2	3	2	4	4	4	4	3	3	3	4	3	3	3	5	5	4	6	4	5	4	4	3	2	3	3	3	3	4	4	3	4	4	3	3
1669	2026/4/7 20:39:47	260秒	微信	N/A	223.104.194.152(山东-济南)	152	2	1	3	2	4	1	1	4	2	1	4	4	3	3	6	5	5	4	4	4	3	6	5	5	5	6	6	6	3	5	3	4	5	4	4	6	6	5	6	5	4	6	6
1670	2026/4/7 20:39:50	235秒	微信	N/A	112.224.222.194(山东-济南)	188	2	1	3	2	4	1	1	3	2	1	4	6	5	5	5	5	5	5	6	5	6	6	5	6	6	6	6	6	6	6	5	5	7	6	6	7	7	7	7	7	6	6	6
1671	2026/4/7 20:40:14	87秒	微信	N/A	223.104.194.135(山东-济南)	133	2	3	3	1	2	2	1	2	1	1	2	6	4	4	4	4	4	4	4	4	5	5	5	4	4	4	4	4	4	4	4	4	4	4	4	4	4	4	4	4	4	4	4
1672	2026/4/7 20:41:36	291秒	微信	N/A	123.147.237.9(重庆-重庆)	137	1	4	3	2	3	2	2	4	2	3	3	4	3	4	4	5	4	5	4	4	5	4	4	5	4	4	5	5	4	4	3	4	5	4	4	5	4	4	6	5	4	4	4
1673	2026/4/7 20:43:21	331秒	微信	N/A	223.99.163.165(山东-济南)	147	2	1	2	2	2	2	3	1	2	1	4	7	2	6	7	4	4	3	6	5	5	5	5	4	4	5	6	7	7	6	4	4	5	3	4	4	3	4	5	3	3	4	3
1674	2026/4/7 20:44:04	71秒	微信	N/A	223.104.194.171(山东-济南)	156	2	2	3	2	2	2	2	1	1	2	1	5	4	5	5	5	5	4	5	5	5	5	5	5	5	5	5	5	5	5	5	5	5	5	5	5	5	3	5	6	5	4	5
1675	2026/4/7 20:44:08	216秒	微信	N/A	218.58.41.143(山东-济南)	78	2	1	3	2	2	2	1	4	2	1	1	7	5	5	7	7	7	7	3	1	1	1	1	1	1	1	1	1	1	1	1	1	2	1	4	1	2	2	1	1	1	1	1
1676	2026/4/7 20:46:37	139秒	微信	N/A	39.144.109.136(山东-聊城)	156	2	2	3	2	2	3	3	4	2	2	1	5	5	5	5	5	4	5	5	5	5	5	5	5	5	5	5	5	5	5	5	5	5	5	5	6	4	5	4	6	4	5	3
1677	2026/4/7 20:49:28	332秒	微信	N/A	39.144.109.152(山东-聊城)	112	2	1	3	2	2	3	3	3	2	2	4	6	3	4	2	7	5	6	3	3	3	5	2	2	3	4	3	6	5	2	2	2	2	4	2	3	3	3	4	2	5	2	4
1678	2026/4/7 20:50:44	52秒	微信	N/A	218.58.41.231(山东-济南)	128	2	1	3	2	4	2	3	2	2	2	2	4	4	4	4	4	4	4	4	4	4	4	4	4	4	4	4	4	4	4	4	4	4	4	4	4	4	4	4	4	4	4	4
1679	2026/4/7 20:53:10	55秒	微信	N/A	223.104.194.173(山东-济南)	128	1	1	3	2	4	2	2	2	2	1	4	4	4	4	4	4	4	4	4	4	4	4	4	4	4	4	4	4	4	4	4	4	4	4	4	4	4	4	4	4	4	4	4
1680	2026/4/7 20:53:27	62秒	微信	N/A	223.99.163.166(山东-济南)	224	2	1	3	2	2	3	2	1	2	1	1	7	7	7	7	7	7	7	7	7	7	7	7	7	7	7	7	7	7	7	7	7	7	7	7	7	7	7	7	7	7	7	7
1681	2026/4/7 20:53:48	68秒	微信	N/A	223.160.160.204(山东-济南)	224	1	1	3	2	3	1	1	3	2	1	1	7	7	7	7	7	7	7	7	7	7	7	7	7	7	7	7	7	7	7	7	7	7	7	7	7	7	7	7	7	7	7	7
1682	2026/4/7 20:54:10	55秒	微信	N/A	39.144.109.158(山东-聊城)	176	2	1	2	2	1	4	4	1	2	3	4	1	1	1	1	1	1	1	1	7	7	7	7	7	7	7	7	7	7	7	7	7	7	7	7	7	7	7	7	7	7	7	7
1683	2026/4/7 20:54:55	282秒	微信	N/A	223.99.163.165(山东-济南)	104	2	1	3	2	4	3	3	5	2	2	4	3	2	2	4	2	2	2	4	4	3	4	4	3	3	3	4	6	4	3	4	3	3	3	4	4	3	3	3	3	3	3	3
1684	2026/4/7 20:55:06	172秒	微信	N/A	39.144.109.188(山东-聊城)	184	2	1	3	2	4	1	1	2	1	2	1	5	5	5	5	4	4	7	6	6	6	6	6	6	6	6	6	6	6	6	6	6	6	6	6	6	6	6	6	6	6	6	5
1685	2026/4/7 20:55:29	182秒	微信	N/A	39.144.109.128(山东-聊城)	113	1	1	3	2	2	1	1	5	2	1	1	4	1	1	4	1	1	4	4	1	4	4	4	7	1	4	4	7	1	1	4	1	7	4	4	4	4	7	4	4	4	4	4
1686	2026/4/7 20:55:32	73秒	微信	N/A	112.224.191.228(山东-济南)	137	2	1	3	2	4	1	2	4	1	2	1	5	5	5	4	4	4	4	4	4	4	4	4	4	4	5	4	5	4	5	4	5	4	5	4	3	5	4	4	5	4	4	4
1687	2026/4/7 20:56:07	86秒	微信	N/A	112.53.79.13(山东-济南)	128	2	1	3	2	4	2	2	3	2	1	1	4	4	4	4	4	4	4	4	4	4	4	4	4	4	4	4	4	4	4	4	4	4	4	4	4	4	4	4	4	4	4	4
1688	2026/4/7 20:57:08	58秒	微信	N/A	223.104.196.4(山东-济宁)	129	2	1	3	2	2	3	2	2	2	2	4	5	4	4	4	4	4	4	4	4	4	4	4	4	4	4	4	4	4	4	4	4	4	4	4	4	4	4	4	4	4	4	4
1689	2026/4/7 20:57:13	161秒	微信	N/A	218.58.41.203(山东-济南)	129	1	1	3	2	4	1	1	3	2	3	4	1	1	1	7	4	3	5	3	4	5	4	4	5	4	5	4	5	4	5	4	5	4	4	4	5	5	5	5	5	3	3	3
1690	2026/4/7 20:57:15	136秒	微信	N/A	39.144.109.170(山东-聊城)	122	1	1	3	2	2	3	2	1	1	1	1	3	4	4	4	5	4	4	4	5	4	3	4	5	4	3	4	5	3	3	3	3	3	3	3	4	4	4	4	4	4	4	4
1691	2026/4/7 20:58:05	346秒	微信	N/A	223.99.163.164(山东-济南)	187	2	1	3	2	2	2	2	1	2	1	4	7	4	6	7	4	4	6	6	6	7	6	6	7	7	5	7	7	6	5	4	3	6	5	6	6	6	6	7	7	5	6	7
1692	2026/4/7 20:58:08	109秒	微信	N/A	112.224.225.74(山东-济南)	121	2	1	2	2	4	1	1	2	2	3	1	5	5	5	5	2	2	3	2	4	4	4	4	3	3	4	4	5	3	3	5	3	5	4	6	4	4	4	4	3	3	3	3
1693	2026/4/7 21:02:12	293秒	微信	N/A	223.104.194.149(山东-济南)	208	2	1	3	2	4	3	1	1	1	2	1	7	6	6	7	7	7	7	7	7	6	6	7	6	2	6	6	7	6	7	7	6	7	7	7	7	7	7	7	6	7	7	6
1694	2026/4/7 21:02:15	92秒	微信	N/A	112.224.221.144(山东-济南)	96	2	2	2	2	2	2	2	3	1	1	4	3	3	3	3	3	3	3	3	3	3	3	3	3	3	3	3	3	3	3	3	3	3	3	3	3	3	3	3	3	3	3	3
1695	2026/4/7 21:04:02	204秒	微信	N/A	39.144.109.137(山东-聊城)	156	2	1	3	2	4	1	1	2	1	1	1	7	4	5	5	7	6	6	5	5	5	5	5	4	3	4	4	5	4	4	4	4	5	5	5	5	5	5	5	5	5	5	5
1696	2026/4/7 21:05:09	64秒	微信	N/A	39.144.109.153(山东-聊城)	68	1	1	5	2	4	1	1	3	2	3	2	3	3	3	3	2	2	2	2	2	2	2	2	2	2	2	2	2	2	2	2	2	2	2	2	2	2	2	2	2	2	2	2
1697	2026/4/7 21:05:39	117秒	微信	N/A	223.99.163.166(山东-济南)	224	1	1	5	2	1	2	1	2	1	1	1	7	7	7	7	7	7	7	7	7	7	7	7	7	7	7	7	7	7	7	7	7	7	7	7	7	7	7	7	7	7	7	7
1698	2026/4/7 21:05:51	91秒	微信	N/A	223.104.194.170(山东-济南)	165	2	1	3	1	3	1	2	1	2	2	2	7	7	7	7	7	7	7	7	7	7	7	7	4	5	4	4	4	4	4	4	4	4	4	4	4	4	4	4	4	4	4	4
1699	2026/4/7 21:06:56	111秒	微信	N/A	112.53.79.14(山东-济南)	147	2	1	2	1	3	2	2	3	2	2	2	5	4	3	6	5	5	3	4	5	4	5	4	5	4	5	6	5	5	6	4	3	4	5	4	6	5	5	4	5	4	5	4
1700	2026/4/7 21:06:56	111秒	微信	N/A	123.233.72.159(山东-济南)	88	2	1	5	1	4	1	2	2	2	1	4	1	1	4	1	3	2	3	1	4	4	1	3	3	3	3	3	3	3	3	3	3	3	3	3	3	3	3	3	3	3	3	3
1701	2026/4/7 21:09:39	153秒	微信	N/A	223.104.194.137(山东-济南)	119	2	1	3	2	4	1	1	3	1	2	1	6	6	5	4	5	4	3	4	3	4	3	3	3	3	3	3	4	3	4	3	3	3	3	3	4	4	4	4	3	4	4	4
1702	2026/4/7 21:10:43	88秒	微信	N/A	112.224.29.26(山东-济南)	224	2	4	3	2	2	2	2	2	2	1	3	7	7	7	7	7	7	7	7	7	7	7	7	7	7	7	7	7	7	7	7	7	7	7	7	7	7	7	7	7	7	7	7
1703	2026/4/7 21:11:06	93秒	微信	N/A	223.104.194.174(山东-济南)	60	1	1	3	2	4	1	1	3	2	1	4	1	1	1	1	1	1	1	1	1	1	1	1	1	1	1	1	1	1	1	1	1	1	1	1	1	1	7	6	4	7	5	5
1704	2026/4/7 21:11:26	99秒	微信	N/A	39.144.109.179(山东-聊城)	182	2	1	5	2	2	3	3	2	1	1	1	7	7	4	7	4	4	7	4	4	4	4	4	4	4	4	4	7	7	7	7	7	7	7	7	6	6	4	6	7	7	7	7
1705	2026/4/7 21:12:17	149秒	微信	N/A	39.144.109.154(山东-聊城)	133	2	1	3	2	2	4	3	2	1	2	1	4	3	3	6	5	4	5	5	4	4	3	3	5	3	3	5	5	3	4	3	3	3	5	5	5	5	4	6	4	4	5	4
1706	2026/4/7 21:13:08	200秒	微信	N/A	223.160.160.204(山东-济南)	203	1	1	3	2	2	3	3	3	2	2	4	7	5	4	7	6	6	6	5	5	6	5	4	7	7	7	6	7	6	7	6	7	7	7	7	7	7	7	7	7	7	7	7
1707	2026/4/7 21:13:08	173秒	微信	N/A	112.224.224.9(山东-济南)	122	1	1	3	2	4	2	2	2	1	1	4	5	5	5	5	1	1	1	1	2	5	5	5	4	4	4	4	4	4	4	4	4	4	4	4	3	4	4	6	4	4	4	4
1708	2026/4/7 21:13:13	115秒	微信	N/A	223.99.163.166(山东-济南)	143	2	2	3	2	3	1	1	3	2	1	1	5	4	4	6	4	4	4	5	5	5	5	5	5	5	5	5	5	5	5	4	4	4	4	4	4	4	4	4	4	4	4	4
1709	2026/4/7 21:13:38	240秒	微信	N/A	117.136.92.128(山东-青岛)	186	2	1	3	2	2	3	2	1	1	1	1	5	6	6	5	4	3	5	5	7	7	7	7	5	4	6	7	7	5	5	6	4	6	7	7	6	7	6	6	5	6	7	7
1710	2026/4/7 21:13:54	111秒	微信	N/A	39.144.109.165(山东-聊城)	128	2	1	5	1	3	1	1	2	1	1	1	4	4	4	4	4	4	4	4	4	4	4	4	4	4	4	4	4	4	4	4	4	4	4	4	4	4	4	4	4	4	4	4
1711	2026/4/7 21:14:29	145秒	微信	N/A	39.144.109.145(山东-聊城)	128	2	1	2	2	2	3	3	2	1	2	4	4	4	4	4	4	4	4	4	4	4	4	4	4	4	4	4	4	4	4	4	4	4	4	4	4	4	4	4	4	4	4	4
1712	2026/4/7 21:14:29	68秒	微信	N/A	218.58.41.118(山东-济南)	194	2	2	3	2	2	3	3	1	2	1	4	7	7	6	6	6	6	6	6	6	6	6	6	6	6	6	6	6	6	6	6	6	6	6	6	6	6	6	6	6	6	6	6
1713	2026/4/7 21:15:18	104秒	微信	N/A	223.104.194.138(山东-济南)	128	2	1	3	2	2	2	2	2	2	1	1	4	4	4	4	4	4	4	4	4	4	4	4	4	4	4	4	4	4	4	4	4	4	4	4	4	4	4	4	4	4	4	4
1714	2026/4/7 21:15:31	90秒	微信	N/A	112.224.143.89(山东-济南)	161	1	1	3	2	4	2	1	4	2	2	4	4	4	4	4	5	5	4	4	5	5	4	4	5	4	6	4	6	5	5	6	5	5	5	5	6	6	6	6	6	6	6	6
1715	2026/4/7 21:15:32	209秒	微信	N/A	223.104.196.75(山东-济宁)	169	2	1	3	2	2	3	3	2	1	1	4	4	5	4	7	4	5	5	5	3	5	5	5	5	6	4	6	7	4	4	5	6	6	5	5	6	6	7	6	6	6	7	5
1716	2026/4/7 21:15:37	116秒	微信	N/A	112.224.163.197(山东-济南)	144	2	1	3	2	3	1	1	3	1	1	4	5	4	3	3	6	4	6	5	5	5	6	4	5	5	5	5	5	5	6	5	3	3	3	6	4	4	4	4	4	4	4	4
1717	2026/4/7 21:15:41	79秒	微信	N/A	112.224.175.3(山东-济南)	128	1	4	3	2	2	2	2	3	1	1	3	4	4	4	4	4	4	4	4	4	4	4	4	4	4	4	4	4	4	4	4	4	4	4	4	4	4	4	4	4	4	4	4
1718	2026/4/7 21:16:04	359秒	微信	N/A	112.224.224.40(山东-济南)	141	2	1	5	2	2	2	2	4	1	1	1	4	4	3	7	5	5	6	4	4	5	5	5	5	5	5	4	5	3	3	4	3	5	5	5	4	3	4	7	4	4	4	2
1719	2026/4/7 21:20:22	66秒	微信	N/A	112.224.163.153(山东-济南)	224	1	1	3	2	2	2	2	4	2	1	4	7	7	7	7	7	7	7	7	7	7	7	7	7	7	7	7	7	7	7	7	7	7	7	7	7	7	7	7	7	7	7	7
1720	2026/4/7 21:20:54	91秒	微信	N/A	112.224.228.247(山东-济南)	123	1	1	3	2	4	2	2	4	2	1	1	3	2	2	5	6	6	6	4	3	4	4	3	3	3	3	3	3	3	4	5	5	4	5	2	2	5	4	5	3	5	4	4
1721	2026/4/7 21:21:05	133秒	微信	N/A	223.104.194.185(山东-济南)	185	2	1	3	2	3	3	3	3	1	1	4	7	6	7	6	5	6	4	5	4	5	6	4	6	6	6	6	6	6	6	6	6	6	6	6	6	6	6	6	6	6	6	6
1722	2026/4/7 21:21:12	41秒	微信	N/A	112.53.79.12(山东-济南)	133	2	3	3	1	1	4	4	4	1	2	1	2	5	5	5	4	4	5	6	3	5	5	4	4	6	5	5	3	5	3	5	5	1	5	3	2	5	5	2	3	5	3	5
1723	2026/4/7 21:21:48	86秒	微信	N/A	182.33.65.56(山东-济宁)	154	2	1	3	2	2	2	3	2	1	1	4	5	5	4	4	4	4	4	4	4	4	4	4	4	4	4	4	4	4	4	4	4	4	4	4	7	7	7	7	7	7	7	7
1724	2026/4/7 21:21:55	732秒	微信	N/A	39.144.109.136(山东-聊城)	140	2	1	3	2	2	2	2	1	2	1	4	4	3	5	4	4	4	4	5	4	5	5	5	4	3	3	5	6	5	7	3	3	5	3	5	4	5	4	5	5	3	6	4
1725	2026/4/7 21:22:20	193秒	微信	N/A	223.104.196.75(山东-济宁)	126	2	1	3	2	2	2	2	2	2	1	4	4	2	4	5	2	2	6	5	2	4	5	5	4	4	4	4	4	4	4	4	4	4	4	4	4	4	4	4	4	4	4	4
1726	2026/4/7 21:22:48	67秒	微信	N/A	223.104.194.174(山东-济南)	224	2	2	3	1	2	3	2	1	1	1	4	7	7	7	7	7	7	7	7	7	7	7	7	7	7	7	7	7	7	7	7	7	7	7	7	7	7	7	7	7	7	7	7
1727	2026/4/7 21:23:48	154秒	微信	N/A	39.144.109.168(山东-聊城)	224	2	1	3	2	2	1	1	2	1	1	4	7	7	7	7	7	7	7	7	7	7	7	7	7	7	7	7	7	7	7	7	7	7	7	7	7	7	7	7	7	7	7	7
1728	2026/4/7 21:24:06	55秒	微信	N/A	39.144.109.177(山东-聊城)	224	2	3	2	1	2	3	3	1	1	1	1	7	7	7	7	7	7	7	7	7	7	7	7	7	7	7	7	7	7	7	7	7	7	7	7	7	7	7	7	7	7	7	7
1729	2026/4/7 21:24:30	59秒	微信	N/A	223.104.194.156(山东-济南)	128	1	1	3	2	2	2	2	4	2	2	1	4	4	4	4	4	4	4	4	4	4	4	4	4	4	4	4	4	4	4	4	4	4	4	4	4	4	4	4	4	4	4	4
1730	2026/4/7 21:25:58	98秒	微信	N/A	39.144.109.166(山东-聊城)	160	1	1	3	2	4	1	1	1	1	2	2	5	5	5	5	5	5	5	5	5	5	5	5	5	5	5	5	5	5	5	5	5	5	5	5	5	5	5	5	5	5	5	5
1731	2026/4/7 21:26:54	96秒	微信	N/A	112.224.222.120(山东-济南)	160	2	3	2	1	4	1	1	3	2	3	4	5	5	5	5	5	5	5	5	5	5	5	5	5	5	5	5	5	5	5	5	5	5	5	5	5	5	5	5	5	5	5	5
1732	2026/4/7 21:26:54	98秒	微信	N/A	39.144.109.168(山东-聊城)	138	1	1	3	2	4	1	1	5	2	1	1	5	2	2	5	6	5	6	3	4	4	4	4	4	4	4	4	7	7	7	7	3	3	3	3	3	3	3	3	5	5	5	5
1733	2026/4/7 21:27:11	68秒	微信	N/A	112.224.143.68(山东-济南)	224	2	1	3	2	4	1	1	5	2	2	1	7	7	7	7	7	7	7	7	7	7	7	7	7	7	7	7	7	7	7	7	7	7	7	7	7	7	7	7	7	7	7	7
1734	2026/4/7 21:27:15	54秒	微信	N/A	39.144.109.138(山东-聊城)	224	2	1	3	2	2	3	1	1	1	1	1	7	7	7	7	7	7	7	7	7	7	7	7	7	7	7	7	7	7	7	7	7	7	7	7	7	7	7	7	7	7	7	7
1735	2026/4/7 21:28:03	93秒	微信	N/A	39.144.109.132(山东-聊城)	128	2	1	3	2	4	1	1	3	2	2	1	4	4	4	4	4	4	4	4	4	4	4	4	4	4	4	4	4	4	4	4	4	4	4	4	4	4	4	4	4	4	4	4
1736	2026/4/7 21:28:59	49秒	微信	N/A	39.144.109.167(山东-聊城)	160	2	3	3	2	1	4	3	4	2	2	4	5	5	5	5	5	5	5	5	5	5	5	5	5	5	5	5	5	5	5	5	5	5	5	5	5	5	5	5	5	5	5	5
1737	2026/4/7 21:29:01	70秒	微信	N/A	113.126.113.89(山东-菏泽)	224	1	3	3	2	2	2	1	1	1	1	1	7	7	7	7	7	7	7	7	7	7	7	7	7	7	7	7	7	7	7	7	7	7	7	7	7	7	7	7	7	7	7	7
1738	2026/4/7 21:29:13	81秒	微信	N/A	112.224.223.85(山东-济南)	98	1	3	3	2	4	1	1	3	1	3	1	4	4	3	3	4	3	3	4	3	4	3	3	3	4	3	3	3	4	2	2	2	2	2	2	3	3	3	4	3	3	3	3
1739	2026/4/7 21:29:23	93秒	微信	N/A	112.53.79.11(山东-济南)	128	2	3	5	2	4	1	1	4	2	1	2	4	4	4	4	4	4	4	4	4	4	4	4	4	4	4	4	4	4	4	4	4	4	4	4	4	4	4	4	4	4	4	4
1740	2026/4/7 21:29:31	188秒	微信	N/A	112.53.79.14(山东-济南)	103	2	1	3	2	4	1	1	3	2	3	1	4	3	6	5	4	2	6	1	2	2	2	2	2	3	4	5	5	2	3	3	2	4	2	5	2	2	2	4	4	3	4	3
1741	2026/4/7 21:29:39	88秒	微信	N/A	112.224.217.187(山东-济南)	155	1	3	3	2	3	1	1	1	1	1	1	6	5	6	6	5	5	4	4	5	4	4	4	4	4	4	4	5	6	5	5	5	5	6	6	5	5	5	5	5	4	5	4
1742	2026/4/7 21:29:50	48秒	微信	N/A	39.144.109.155(山东-聊城)	128	2	3	3	2	4	1	1	1	1	1	1	4	4	4	4	4	4	4	4	4	4	4	4	4	4	4	4	4	4	4	4	4	4	4	4	4	4	4	4	4	4	4	4
1743	2026/4/7 21:29:57	64秒	微信	N/A	112.224.22.93(山东-济南)	224	1	3	3	2	4	4	4	4	1	1	3	7	7	7	7	7	7	7	7	7	7	7	7	7	7	7	7	7	7	7	7	7	7	7	7	7	7	7	7	7	7	7	7
1744	2026/4/7 21:30:03	65秒	微信	N/A	39.82.244.166(山东-济南)	128	2	3	3	2	4	1	1	2	2	2	3	4	4	4	4	4	4	4	4	4	4	4	4	4	4	4	4	4	4	4	4	4	4	4	4	4	4	4	4	4	4	4	4
1745	2026/4/7 21:30:20	58秒	微信	N/A	223.104.194.153(山东-济南)	160	2	3	3	2	4	1	1	1	2	1	1	5	5	5	5	5	5	5	5	5	5	5	5	5	5	5	5	5	5	5	5	5	5	5	5	5	5	5	5	5	5	5	5
1746	2026/4/7 21:30:22	80秒	微信	N/A	223.99.163.166(山东-济南)	128	1	3	3	2	4	1	1	5	2	3	3	4	4	4	4	4	4	4	4	4	4	4	4	4	4	4	4	4	4	4	4	4	4	4	4	4	4	4	4	4	4	4	4
1747	2026/4/7 21:30:23	56秒	微信	N/A	39.144.109.147(山东-聊城)	116	2	3	3	2	4	1	1	4	2	2	1	4	4	4	5	4	4	4	4	3	3	3	3	4	4	3	5	4	3	4	3	4	3	4	3	4	3	3	4	3	4	3	3
1748	2026/4/7 21:30:40	121秒	微信	N/A	112.224.222.82(山东-济南)	184	1	3	3	2	2	2	1	2	1	2	3	6	2	4	4	6	6	6	6	6	6	6	6	6	6	6	6	6	6	6	6	6	6	6	6	6	6	6	6	6	6	6	6
1749	2026/4/7 21:30:42	68秒	微信	N/A	223.99.163.165(山东-济南)	224	1	3	5	2	4	2	2	3	2	1	1	7	7	7	7	7	7	7	7	7	7	7	7	7	7	7	7	7	7	7	7	7	7	7	7	7	7	7	7	7	7	7	7
1750	2026/4/7 21:30:46	141秒	微信	N/A	39.144.109.156(山东-聊城)	119	1	3	3	2	2	2	1	5	2	3	4	4	1	3	5	6	6	7	3	2	3	4	3	6	6	7	5	4	4	4	3	1	1	1	1	4	4	4	4	4	3	3	3
1751	2026/4/7 21:30:47	96秒	微信	N/A	223.104.196.18(山东-济宁)	174	2	3	3	2	2	2	2	1	1	1	1	6	6	6	6	5	5	5	5	4	4	4	4	5	5	5	5	6	6	6	6	6	6	6	6	7	7	7	7	4	4	5	5
1752	2026/4/7 21:30:49	95秒	微信	N/A	223.104.194.138(山东-济南)	130	2	3	3	2	4	1	1	2	2	2	3	5	4	4	4	4	4	4	4	4	4	5	4	4	4	4	4	4	4	4	4	4	4	4	4	4	4	4	4	4	4	4	4
1753	2026/4/7 21:30:56	130秒	微信	N/A	112.53.79.14(山东-济南)	159	2	3	3	2	4	1	3	2	1	2	3	7	6	6	6	3	3	6	2	5	5	5	5	5	5	5	5	5	5	5	5	5	5	5	5	5	5	5	5	5	5	5	5
1754	2026/4/7 21:31:04	59秒	微信	N/A	112.53.79.13(山东-济南)	128	2	3	3	2	2	2	2	4	1	1	1	4	4	4	4	4	4	4	4	4	4	4	4	4	4	4	4	4	4	4	4	4	4	4	4	4	4	4	4	4	4	4	4
1755	2026/4/7 21:31:06	71秒	微信	N/A	39.144.109.153(山东-聊城)	77	2	1	1	1	1	4	4	5	2	3	4	1	1	1	1	1	1	1	1	1	1	1	1	1	2	4	4	2	4	3	3	6	3	5	5	1	3	5	2	4	4	1	3
1756	2026/4/7 21:31:10	118秒	微信	N/A	223.104.194.130(山东-济南)	87	2	3	3	2	4	1	2	1	2	2	1	2	2	2	2	3	3	3	3	2	2	2	2	3	2	3	3	4	3	3	3	3	3	2	3	3	3	3	3	3	3	3	3
1757	2026/4/7 21:31:11	87秒	微信	N/A	39.144.109.156(山东-聊城)	182	1	3	3	2	4	1	1	5	2	3	3	7	7	7	7	7	7	7	7	7	7	7	7	7	7	7	7	1	7	1	1	1	1	1	1	7	7	7	7	7	7	7	7
1758	2026/4/7 21:31:18	65秒	微信	N/A	223.104.194.136(山东-济南)	128	2	3	5	2	3	1	1	2	2	2	1	4	4	4	4	4	4	4	4	4	4	4	4	4	4	4	4	4	4	4	4	4	4	4	4	4	4	4	4	4	4	4	4
1759	2026/4/7 21:31:30	50秒	微信	N/A	39.144.109.165(山东-聊城)	120	2	3	3	2	3	2	2	3	2	2	1	4	4	4	4	3	3	5	3	3	3	5	6	3	3	5	4	3	3	4	5	3	3	4	4	3	4	4	3	4	3	4	4
1760	2026/4/7 21:31:34	203秒	微信	N/A	112.53.79.14(山东-济南)	146	2	3	3	2	2	1	1	3	1	1	4	6	3	6	4	5	5	4	6	6	5	5	6	5	4	4	4	6	7	4	4	3	5	3	4	5	4	4	4	4	4	4	3
1761	2026/4/7 21:31:40	108秒	微信	N/A	223.160.161.71(山东-济南)	160	2	3	3	2	3	1	1	4	2	3	1	5	5	4	5	5	4	5	6	5	6	5	5	5	5	5	5	5	5	5	5	5	5	5	5	5	5	5	5	5	5	5	5
1762	2026/4/7 21:31:43	159秒	微信	N/A	223.104.194.146(山东-济南)	171	2	3	5	2	4	1	1	5	2	3	3	5	5	5	5	5	5	5	5	6	6	6	5	6	5	6	5	6	6	5	6	6	5	5	5	5	6	5	5	5	5	6	5
1763	2026/4/7 21:31:49	117秒	微信	N/A	223.104.194.148(山东-济南)	151	2	3	3	2	2	3	3	4	2	2	4	7	4	2	6	5	5	5	5	5	5	5	5	5	5	3	5	5	3	3	5	5	5	5	5	5	5	5	5	5	5	4	4
1764	2026/4/7 21:31:54	144秒	微信	N/A	39.144.109.182(山东-聊城)	67	2	3	3	2	3	1	1	3	2	2	3	4	3	2	2	2	2	2	2	2	2	2	2	2	2	2	2	2	2	2	2	2	2	2	2	2	2	2	2	2	2	2	2
1765	2026/4/7 21:31:54	82秒	微信	N/A	112.224.163.176(山东-济南)	213	2	3	3	2	3	1	1	1	1	2	3	7	7	7	7	4	4	4	5	7	7	7	7	7	7	7	7	7	7	7	7	7	7	7	7	7	7	7	7	7	7	7	7
1766	2026/4/7 21:31:58	210秒	微信	N/A	112.53.79.14(山东-济南)	224	1	3	3	2	3	1	1	3	1	2	1	7	7	7	7	7	7	7	7	7	7	7	7	7	7	7	7	7	7	7	7	7	7	7	7	7	7	7	7	7	7	7	7
1767	2026/4/7 21:31:59	144秒	微信	N/A	39.144.109.130(山东-聊城)	126	2	3	3	2	4	3	3	1	1	1	2	6	1	2	6	4	4	4	4	4	3	3	3	3	3	3	3	5	5	4	2	1	4	5	4	6	4	6	7	5	4	4	4
1768	2026/4/7 21:32:14	71秒	微信	N/A	223.160.161.244(山东-济南)	165	1	1	3	2	4	1	1	3	2	1	2	6	5	5	5	5	5	6	5	5	5	5	5	5	5	5	5	5	5	5	5	5	6	5	5	5	5	5	5	5	6	5	6
1769	2026/4/7 21:32:42	232秒	微信	N/A	39.144.109.172(山东-聊城)	152	2	3	3	2	4	2	1	4	2	3	3	5	3	3	6	6	6	6	6	6	6	6	6	6	6	6	6	6	4	4	4	2	2	2	2	2	3	3	5	6	6	6	6
1770	2026/4/7 21:32:50	101秒	微信	N/A	39.144.109.134(山东-聊城)	128	2	3	2	2	4	1	1	4	2	2	1	4	4	4	4	4	4	4	4	4	4	4	4	4	4	4	4	4	4	4	4	4	4	4	4	4	4	4	4	4	4	4	4
1771	2026/4/7 21:33:15	54秒	微信	N/A	223.99.163.166(山东-济南)	159	2	3	3	2	4	1	1	5	2	2	1	5	4	4	4	5	5	5	5	5	5	5	5	5	5	5	5	5	5	5	5	5	5	5	4	5	4	6	6	6	6	6	4
1772	2026/4/7 21:33:18	64秒	微信	N/A	223.104.194.153(山东-济南)	212	2	3	3	2	4	3	1	1	2	1	3	7	7	6	6	7	6	6	7	7	6	6	7	7	7	7	7	7	7	7	6	6	6	7	6	7	7	6	7	7	6	7	7
1773	2026/4/7 21:33:29	87秒	微信	N/A	223.104.194.173(山东-济南)	160	1	3	5	2	4	2	2	3	2	2	1	5	5	5	5	5	5	5	5	5	5	5	5	5	5	5	5	5	5	5	5	5	5	5	5	5	5	5	5	5	5	5	5
1774	2026/4/7 21:33:33	85秒	微信	N/A	112.224.191.6(山东-济南)	128	2	3	3	2	4	1	1	2	1	1	1	4	4	4	4	4	4	4	4	4	4	4	4	4	4	4	4	4	4	4	4	4	4	4	4	4	4	4	4	4	4	4	4
1775	2026/4/7 21:33:33	69秒	微信	N/A	218.58.41.176(山东-济南)	224	2	3	3	2	2	2	2	3	1	2	2	7	7	7	7	7	7	7	7	7	7	7	7	7	7	7	7	7	7	7	7	7	7	7	7	7	7	7	7	7	7	7	7
1776	2026/4/7 21:33:37	84秒	微信	N/A	223.104.195.240(山东-泰安)	169	2	3	3	2	4	1	1	3	2	2	3	5	5	5	5	5	5	5	5	5	5	5	5	5	5	5	5	5	4	5	5	5	4	4	5	7	7	7	7	6	6	6	6
1777	2026/4/7 21:33:47	119秒	微信	N/A	123.233.72.68(山东-济南)	152	2	3	2	2	3	1	1	3	2	3	2	5	5	5	5	5	5	5	5	5	5	5	5	5	5	5	5	5	4	5	4	4	5	5	4	5	4	4	5	4	5	4	5
1778	2026/4/7 21:34:00	81秒	微信	N/A	223.99.163.166(山东-济南)	135	2	3	3	2	2	2	2	2	1	2	1	5	5	2	4	4	4	4	4	4	4	4	4	6	4	5	4	5	3	4	4	5	4	5	4	4	3	5	4	5	4	4	5
1779	2026/4/7 21:34:02	104秒	微信	N/A	39.144.109.186(山东-聊城)	200	2	3	5	2	2	2	2	1	1	1	3	7	5	5	5	6	6	6	6	6	5	5	6	7	7	6	5	7	7	7	5	7	7	5	7	7	7	7	7	7	6	7	7
1780	2026/4/7 21:34:14	52秒	微信	N/A	144.12.205.152(山东-滨州)	128	2	3	2	2	1	3	3	4	2	2	1	4	4	4	4	4	4	4	4	4	4	4	4	4	4	4	4	4	4	4	4	4	4	4	4	4	4	4	4	4	4	4	4
1781	2026/4/7 21:34:18	67秒	微信	N/A	39.144.109.161(山东-聊城)	224	2	3	3	2	2	2	2	1	1	1	2	7	7	7	7	7	7	7	7	7	7	7	7	7	7	7	7	7	7	7	7	7	7	7	7	7	7	7	7	7	7	7	7
1782	2026/4/7 21:34:23	1611秒	微信	N/A	223.99.163.166(山东-济南)	147	2	1	3	2	2	2	2	4	2	1	2	3	2	5	6	6	7	7	6	4	3	2	3	5	6	7	7	3	5	4	3	2	5	3	5	5	3	5	7	6	5	5	2
1783	2026/4/7 21:34:24	100秒	微信	N/A	112.224.225.0(山东-济南)	224	1	3	5	2	2	1	1	4	1	1	1	7	7	7	7	7	7	7	7	7	7	7	7	7	7	7	7	7	7	7	7	7	7	7	7	7	7	7	7	7	7	7	7
1784	2026/4/7 21:34:24	74秒	微信	N/A	112.224.228.34(山东-济南)	142	1	3	3	2	4	1	1	3	1	3	3	7	5	5	5	4	4	3	3	4	4	5	4	4	5	4	4	5	4	4	5	4	5	4	5	4	5	5	4	5	4	5	4
1785	2026/4/7 21:34:25	87秒	微信	N/A	39.144.109.179(山东-聊城)	150	2	3	2	2	4	2	2	1	2	3	1	6	6	6	6	6	5	5	5	4	4	4	6	4	4	4	4	4	4	4	4	3	4	4	4	5	5	5	5	5	5	5	5
1786	2026/4/7 21:34:25	187秒	微信	N/A	112.224.225.172(山东-济南)	224	1	3	2	2	2	3	3	4	2	1	3	7	7	7	7	7	7	7	7	7	7	7	7	7	7	7	7	7	7	7	7	7	7	7	7	7	7	7	7	7	7	7	7
1787	2026/4/7 21:34:32	99秒	微信	N/A	112.224.163.102(山东-济南)	224	1	3	3	2	1	2	3	5	2	3	3	7	7	7	7	7	7	7	7	7	7	7	7	7	7	7	7	7	7	7	7	7	7	7	7	7	7	7	7	7	7	7	7
1788	2026/4/7 21:34:54	127秒	微信	N/A	144.12.153.133(山东-聊城)	224	2	3	3	2	2	3	3	1	1	2	3	7	7	7	7	7	7	7	7	7	7	7	7	7	7	7	7	7	7	7	7	7	7	7	7	7	7	7	7	7	7	7	7
1789	2026/4/7 21:35:03	133秒	微信	N/A	39.144.109.167(山东-聊城)	158	1	3	3	2	1	3	1	1	1	1	4	3	3	6	6	6	6	6	6	6	6	6	3	6	6	6	6	6	6	6	5	3	4	6	4	3	3	3	4	4	3	5	6
1790	2026/4/7 21:35:12	250秒	微信	N/A	223.104.195.127(山东-泰安)	178	2	3	3	2	2	2	1	4	2	1	1	5	5	5	5	5	5	5	5	5	5	5	5	6	6	6	6	6	6	6	6	4	6	6	6	6	6	6	6	6	6	6	6
1791	2026/4/7 21:35:12	40秒	微信	N/A	112.224.143.43(山东-济南)	192	1	1	4	2	1	1	3	4	1	2	2	6	6	6	6	6	6	6	6	6	6	6	6	6	6	6	6	6	6	6	6	6	6	6	6	6	6	6	6	6	6	6	6
1792	2026/4/7 21:35:13	194秒	微信	N/A	112.224.226.148(山东-济南)	224	2	3	3	2	2	3	3	1	1	1	2	7	7	7	7	7	7	7	7	7	7	7	7	7	7	7	7	7	7	7	7	7	7	7	7	7	7	7	7	7	7	7	7
1793	2026/4/7 21:35:13	151秒	微信	N/A	112.53.79.13(山东-济南)	123	2	3	5	2	4	1	2	2	2	2	1	5	3	2	4	2	2	2	3	6	6	5	3	3	3	3	5	5	6	5	2	2	3	4	5	4	5	5	4	3	4	5	4
1794	2026/4/7 21:35:14	68秒	微信	N/A	123.233.72.165(山东-济南)	128	2	3	3	2	4	1	1	3	2	2	1	4	4	4	4	4	4	4	4	4	4	4	4	4	4	4	4	4	4	4	4	4	4	4	4	4	4	4	4	4	4	4	4
1795	2026/4/7 21:35:14	143秒	微信	N/A	123.233.72.42(山东-济南)	128	1	3	3	2	1	1	1	5	2	1	3	4	4	4	4	4	4	4	4	4	4	4	4	4	4	4	4	4	4	4	4	4	4	4	4	4	4	4	4	4	4	4	4
1796	2026/4/7 21:35:16	147秒	微信	N/A	223.99.163.164(山东-济南)	127	2	3	2	2	2	2	2	1	1	1	2	1	1	1	1	5	3	6	4	7	5	5	4	4	4	4	4	7	5	4	4	4	4	4	4	4	4	4	4	4	4	4	4
1797	2026/4/7 21:35:18	102秒	微信	N/A	223.104.194.173(山东-济南)	128	2	3	3	2	3	2	2	3	1	2	3	4	4	4	4	4	4	4	4	4	4	4	4	4	4	4	4	4	4	4	4	4	4	4	4	4	4	4	4	4	4	4	4
1798	2026/4/7 21:35:20	155秒	微信	N/A	39.144.109.155(山东-聊城)	130	2	3	5	2	4	1	1	1	2	1	1	5	5	4	4	4	5	4	4	4	5	4	5	3	4	4	5	3	5	3	4	3	4	3	4	3	4	4	3	4	5	5	4
1799	2026/4/7 21:35:22	144秒	微信	N/A	223.104.194.149(山东-济南)	129	2	1	3	2	4	1	1	3	2	1	1	5	4	4	4	4	4	4	4	4	4	4	4	4	4	4	4	4	4	4	4	4	4	4	4	4	4	4	4	4	4	4	4
1800	2026/4/7 21:35:36	68秒	微信	N/A	112.224.160.206(山东-济南)	182	2	3	3	2	4	1	1	2	2	2	3	5	5	5	5	4	4	5	5	6	6	6	6	6	6	6	6	6	6	6	6	6	6	6	6	6	6	6	6	6	6	6	6
1801	2026/4/7 21:35:41	172秒	微信	N/A	112.53.79.14(山东-济南)	117	2	3	2	2	2	1	1	5	2	2	2	4	6	6	6	2	2	2	5	5	5	2	2	2	2	3	2	4	4	4	2	3	3	3	3	4	5	3	3	4	4	7	5
1802	2026/4/7 21:35:41	140秒	微信	N/A	39.144.109.153(山东-聊城)	166	2	1	2	2	2	2	2	2	1	2	3	5	4	5	6	6	6	6	6	5	6	5	5	5	5	6	6	5	5	4	4	4	5	5	5	5	5	5	5	5	5	6	6
1803	2026/4/7 21:35:42	74秒	微信	N/A	39.144.109.141(山东-聊城)	224	1	3	3	2	2	2	3	4	2	2	2	7	7	7	7	7	7	7	7	7	7	7	7	7	7	7	7	7	7	7	7	7	7	7	7	7	7	7	7	7	7	7	7
1804	2026/4/7 21:35:42	138秒	微信	N/A	223.104.194.182(山东-济南)	166	1	3	5	2	2	3	2	3	2	3	4	5	6	5	6	5	5	5	5	5	5	5	5	6	6	6	6	6	6	6	6	2	2	2	2	6	6	6	6	6	6	6	6
1805	2026/4/7 21:35:45	61秒	微信	N/A	112.224.191.192(山东-济南)	130	1	3	3	1	2	3	3	5	2	3	3	4	4	4	4	4	4	4	4	4	4	4	4	4	4	4	4	5	5	3	4	5	4	3	3	5	4	4	4	5	4	4	4
1806	2026/4/7 21:36:04	156秒	微信	N/A	223.104.194.139(山东-济南)	159	2	3	3	2	3	2	1	1	1	2	1	6	3	4	4	5	5	5	5	5	5	5	5	6	6	6	6	4	5	5	4	4	5	5	5	5	5	6	4	5	4	6	6
1807	2026/4/7 21:36:06	132秒	微信	N/A	223.104.194.160(山东-济南)	139	2	3	3	2	3	2	1	2	1	1	3	5	1	3	5	4	4	5	4	4	4	5	5	5	5	5	5	6	4	4	3	3	5	5	5	4	4	4	5	3	5	5	5
1808	2026/4/7 21:36:07	82秒	微信	N/A	182.39.151.232(山东-枣庄)	128	2	3	3	2	2	2	3	1	2	1	2	4	4	4	4	4	4	4	4	4	4	4	4	4	4	4	4	4	4	4	4	4	4	4	4	4	4	4	4	4	4	4	4
1809	2026/4/7 21:36:14	126秒	微信	N/A	39.144.109.169(山东-聊城)	128	2	3	3	2	3	1	1	4	2	3	4	4	4	4	4	4	4	4	4	4	4	4	4	4	4	4	4	4	4	4	4	4	4	4	4	4	4	4	4	4	4	4	4
1810	2026/4/7 21:36:24	155秒	微信	N/A	39.144.109.169(山东-聊城)	116	2	3	5	2	2	3	3	2	2	2	3	4	4	3	3	5	4	4	4	5	5	3	3	4	4	4	4	4	3	3	3	3	3	4	3	4	2	3	4	4	3	4	3
1811	2026/4/7 21:36:32	157秒	微信	N/A	112.224.191.72(山东-济南)	160	2	3	2	2	4	2	1	2	1	2	3	6	6	4	5	4	5	5	3	5	4	3	5	5	5	6	5	6	4	6	4	6	5	6	4	5	5	5	6	5	5	6	6
1812	2026/4/7 21:36:34	70秒	微信	N/A	112.224.223.108(山东-济南)	128	2	3	3	2	2	2	2	5	2	1	1	4	4	4	4	4	4	4	4	4	4	4	4	4	4	4	4	4	4	4	4	4	4	4	4	4	4	4	4	4	4	4	4
1813	2026/4/7 21:37:01	119秒	微信	N/A	112.224.190.99(山东-济南)	147	2	3	3	2	4	1	1	1	1	2	3	4	5	5	4	5	5	5	5	5	5	5	5	5	5	5	5	6	6	6	3	4	4	4	4	4	4	4	4	4	4	4	4
1814	2026/4/7 21:37:39	108秒	微信	N/A	39.144.109.165(山东-聊城)	149	2	3	3	2	2	2	2	1	2	1	3	6	2	6	5	5	5	5	5	5	5	5	5	5	5	5	5	5	5	5	5	2	2	2	5	5	4	5	5	5	5	5	5
1815	2026/4/7 21:37:42	69秒	微信	N/A	223.104.194.146(山东-济南)	224	1	3	2	2	2	3	3	1	1	1	3	7	7	7	7	7	7	7	7	7	7	7	7	7	7	7	7	7	7	7	7	7	7	7	7	7	7	7	7	7	7	7	7
1816	2026/4/7 21:37:44	101秒	微信	N/A	223.104.194.132(山东-济南)	127	2	3	5	2	2	1	1	2	1	1	1	4	4	4	2	5	5	4	2	5	2	5	2	5	5	4	3	5	3	5	5	5	5	4	4	4	3	4	3	5	4	4	3
1817	2026/4/7 21:37:49	446秒	微信	N/A	218.58.41.36(山东-济南)	147	2	1	3	2	2	2	1	1	2	1	4	5	5	3	7	5	2	6	4	5	5	4	4	6	7	7	4	6	6	3	2	1	1	1	2	1	5	6	7	6	7	7	7
1818	2026/4/7 21:38:02	100秒	微信	N/A	223.104.194.152(山东-济南)	218	2	3	2	2	2	1	1	2	2	2	4	7	1	7	7	7	7	7	7	7	7	7	7	7	7	7	7	7	7	7	7	7	7	7	7	7	7	7	7	7	7	7	7
1819	2026/4/7 21:38:03	91秒	微信	N/A	223.99.163.165(山东-济南)	160	1	3	5	2	4	1	1	4	2	1	2	5	5	5	5	5	5	5	5	5	5	5	5	5	5	5	5	5	5	5	5	5	5	5	5	5	5	5	5	5	5	5	5
1820	2026/4/7 21:38:09	157秒	微信	N/A	153.119.2.17(山东-济南)	115	2	3	5	2	4	1	1	1	2	3	1	1	2	1	4	3	3	3	4	7	7	5	3	1	1	2	4	7	7	7	2	1	5	1	1	2	1	1	1	7	7	7	7
1821	2026/4/7 21:38:16	139秒	微信	N/A	39.144.109.161(山东-聊城)	120	2	3	5	2	4	1	1	3	2	2	1	3	3	3	3	4	4	4	4	4	4	4	4	4	4	4	4	4	4	4	4	3	3	3	3	4	4	4	4	4	4	4	4
1822	2026/4/7 21:38:22	163秒	微信	N/A	39.144.109.170(山东-聊城)	104	2	3	3	2	4	1	2	1	2	3	3	4	4	3	2	3	3	2	2	3	3	4	3	5	5	3	4	5	5	5	2	1	2	2	2	2	2	2	1	5	5	5	5
1823	2026/4/7 21:38:45	218秒	微信	N/A	223.99.163.164(山东-济南)	160	2	3	2	2	2	3	1	3	2	2	4	5	5	5	5	5	5	5	5	5	5	5	5	5	5	5	5	5	5	5	5	5	5	5	5	5	5	5	5	5	5	5	5
1824	2026/4/7 21:38:52	59秒	微信	N/A	153.119.56.178(山东-菏泽)	192	2	1	3	1	3	1	1	1	1	1	1	6	6	6	6	6	6	6	6	6	6	6	6	6	6	6	6	6	6	6	6	6	6	6	6	6	6	6	6	6	6	6	6
1825	2026/4/7 21:39:01	94秒	微信	N/A	39.144.109.186(山东-聊城)	224	2	3	3	2	4	1	1	4	1	2	3	7	7	7	7	7	7	7	7	7	7	7	7	7	7	7	7	7	7	7	7	7	7	7	7	7	7	7	7	7	7	7	7
1826	2026/4/7 21:39:23	65秒	微信	N/A	112.224.221.178(山东-济南)	224	1	3	3	2	1	1	1	4	2	3	4	7	7	7	7	7	7	7	7	7	7	7	7	7	7	7	7	7	7	7	7	7	7	7	7	7	7	7	7	7	7	7	7
1827	2026/4/7 21:39:30	166秒	微信	N/A	223.99.163.165(山东-济南)	115	2	3	3	2	2	3	3	3	1	2	1	6	5	3	3	3	3	4	3	4	3	3	3	3	3	3	3	5	5	4	4	2	4	2	2	4	4	4	4	4	4	4	4
1828	2026/4/7 21:39:42	115秒	微信	N/A	112.224.162.248(山东-济南)	190	2	2	3	1	4	1	1	2	1	2	2	6	6	5	6	6	6	6	6	4	6	5	6	6	6	6	6	6	5	6	6	5	6	6	6	6	7	7	7	7	6	6	6
1829	2026/4/7 21:39:43	79秒	微信	N/A	123.233.72.48(山东-济南)	178	1	2	2	1	2	3	2	5	2	1	1	6	5	6	7	5	6	5	6	6	5	6	5	6	5	6	5	6	5	6	5	6	5	6	5	6	5	6	5	6	5	6	5
1830	2026/4/7 21:39:51	114秒	微信	N/A	112.224.227.167(山东-济南)	178	2	3	2	2	4	1	1	3	2	3	3	5	5	5	5	5	5	5	5	5	5	5	5	5	5	6	6	6	6	6	6	6	6	6	6	6	6	6	6	6	6	6	6
1831	2026/4/7 21:39:55	153秒	微信	N/A	223.160.165.75(山东-济南)	126	2	3	3	2	2	1	1	4	1	1	1	4	3	3	4	4	4	4	4	4	4	4	4	4	4	4	4	4	4	4	4	4	4	4	4	4	4	4	4	4	4	4	4
1832	2026/4/7 21:39:57	74秒	微信	N/A	112.232.212.196(山东-济南)	196	2	3	2	2	4	2	2	2	1	3	1	7	7	7	7	6	6	6	6	6	6	6	6	6	6	6	6	6	6	6	6	6	6	6	6	6	6	6	6	6	6	6	6
1833	2026/4/7 21:40:36	140秒	微信	N/A	39.144.109.158(山东-聊城)	150	2	3	3	2	4	2	1	1	1	1	1	5	4	6	6	4	4	4	4	5	5	5	5	5	5	5	5	7	5	5	3	3	4	3	3	5	5	5	5	5	5	5	5
1834	2026/4/7 21:40:44	174秒	微信	N/A	112.53.79.12(山东-济南)	140	1	3	5	2	4	4	3	2	1	2	2	4	3	3	4	4	5	4	5	5	5	4	4	5	4	6	5	4	4	4	4	3	4	5	5	4	4	4	5	5	5	5	5
1835	2026/4/7 21:40:48	73秒	微信	N/A	223.104.194.164(山东-济南)	160	1	3	5	2	2	1	3	5	2	3	2	5	5	5	5	5	5	5	5	5	5	5	5	5	5	5	5	5	5	5	5	5	5	5	5	5	5	5	5	5	5	5	5
1836	2026/4/7 21:40:49	154秒	微信	N/A	112.224.228.28(山东-济南)	104	1	3	3	2	2	3	3	5	2	3	2	4	4	4	4	4	4	4	4	4	4	4	4	4	4	4	4	4	4	4	4	2	2	2	2	2	2	2	2	2	2	2	2
1837	2026/4/7 21:41:14	192秒	微信	N/A	112.224.223.56(山东-济南)	134	2	3	3	2	4	1	1	1	2	2	1	4	2	3	5	2	3	3	3	6	6	5	4	4	4	4	4	6	6	5	4	4	5	4	6	4	4	4	4	4	4	4	4
1838	2026/4/7 21:41:16	126秒	微信	N/A	223.160.161.4(山东-济南)	151	1	3	3	2	1	3	3	4	2	2	2	6	6	6	6	4	4	4	4	5	5	5	5	5	5	5	5	5	5	5	5	5	5	4	5	3	3	3	3	5	5	5	5
1839	2026/4/7 21:41:20	98秒	微信	N/A	223.104.196.184(山东-菏泽)	128	1	3	5	2	2	1	1	4	1	2	3	4	4	4	4	4	4	4	4	4	4	4	4	4	4	4	4	4	4	4	4	4	4	4	4	4	4	4	4	4	4	4	4
1840	2026/4/7 21:41:24	195秒	微信	N/A	112.224.17.29(山东-济南)	141	2	3	2	2	2	1	2	1	2	2	4	3	1	3	4	4	3	4	5	5	6	7	7	4	3	3	4	6	7	7	4	4	6	4	4	4	4	4	4	4	4	5	4
1841	2026/4/7 21:41:30	201秒	微信	N/A	112.224.222.206(山东-济南)	129	2	3	3	2	4	1	1	1	2	2	3	7	7	4	5	7	6	5	5	5	5	5	5	3	2	3	3	4	4	4	4	3	3	3	3	3	3	3	3	3	3	3	3
1842	2026/4/7 21:41:37	122秒	微信	N/A	112.224.224.254(山东-济南)	128	2	3	5	2	4	1	1	2	2	2	2	6	3	3	4	4	4	4	4	4	4	4	4	4	4	4	4	4	4	4	4	4	4	4	4	4	4	4	4	4	4	4	4
1843	2026/4/7 21:41:46	261秒	微信	N/A	182.39.187.73(山东-枣庄)	224	1	1	2	2	4	1	1	2	2	2	2	7	7	7	7	7	7	7	7	7	7	7	7	7	7	7	7	7	7	7	7	7	7	7	7	7	7	7	7	7	7	7	7
1844	2026/4/7 21:41:58	165秒	微信	N/A	39.144.109.174(山东-聊城)	189	2	3	3	2	2	2	2	3	2	3	4	5	5	5	5	5	5	5	5	7	7	6	6	7	7	7	7	6	6	6	6	6	6	6	6	5	6	6	6	6	6	6	6
1845	2026/4/7 21:42:11	105秒	微信	N/A	223.104.194.161(山东-济南)	224	2	3	3	2	3	1	1	2	1	3	4	7	7	7	7	7	7	7	7	7	7	7	7	7	7	7	7	7	7	7	7	7	7	7	7	7	7	7	7	7	7	7	7
1846	2026/4/7 21:42:20	223秒	微信	N/A	223.99.163.166(山东-济南)	203	2	3	3	2	4	1	2	2	2	1	1	7	5	5	5	7	7	7	6	7	7	6	6	6	5	6	6	7	7	7	7	5	7	5	5	7	7	7	7	7	7	7	6
1847	2026/4/7 21:42:20	95秒	微信	N/A	123.233.72.83(山东-济南)	224	1	3	3	2	4	1	1	3	2	2	1	7	7	7	7	7	7	7	7	7	7	7	7	7	7	7	7	7	7	7	7	7	7	7	7	7	7	7	7	7	7	7	7
1848	2026/4/7 21:42:31	108秒	微信	N/A	153.119.60.51(山东-青岛)	135	2	3	2	2	4	1	1	2	2	3	1	1	3	3	3	4	4	4	4	4	4	4	4	4	5	4	5	5	4	5	6	6	5	5	4	5	4	4	5	5	3	4	5
1849	2026/4/7 21:42:39	117秒	微信	N/A	39.144.109.173(山东-聊城)	224	1	3	3	2	4	1	1	5	2	1	3	7	7	7	7	7	7	7	7	7	7	7	7	7	7	7	7	7	7	7	7	7	7	7	7	7	7	7	7	7	7	7	7
1850	2026/4/7 21:42:39	58秒	微信	N/A	223.104.194.177(山东-济南)	128	1	3	3	2	2	2	2	5	2	3	1	4	4	4	4	4	4	4	4	4	4	4	4	4	4	4	4	4	4	4	4	4	4	4	4	4	4	4	4	4	4	4	4
1851	2026/4/7 21:43:01	144秒	微信	N/A	112.36.138.4(山东-济南)	216	2	3	3	2	2	1	2	1	1	1	1	7	7	7	7	5	5	5	5	7	7	7	7	7	7	7	7	7	7	7	7	7	7	7	7	7	7	7	7	7	7	7	7
1852	2026/4/7 21:43:05	213秒	微信	N/A	112.53.79.11(山东-济南)	161	2	3	3	2	4	1	1	2	2	1	2	5	5	4	5	6	6	6	6	6	6	6	6	5	4	4	5	6	6	5	4	3	4	3	4	5	5	5	6	5	5	5	5
1853	2026/4/7 21:43:05	117秒	微信	N/A	112.224.163.221(山东-济南)	143	2	3	5	2	4	1	1	1	2	2	1	5	4	4	4	5	5	4	5	5	4	5	3	4	5	4	5	4	5	5	4	4	5	4	5	4	4	5	5	5	4	4	5
1854	2026/4/7 21:43:19	71秒	微信	N/A	39.144.109.151(山东-聊城)	160	1	3	5	2	4	1	1	4	2	2	2	5	5	5	5	5	5	5	5	5	5	5	5	5	5	5	5	5	5	5	5	5	5	5	5	5	5	5	5	5	5	5	5
1855	2026/4/7 21:43:19	99秒	微信	N/A	112.224.161.28(山东-济南)	128	2	3	5	2	3	3	2	1	2	3	4	4	4	4	4	4	4	4	4	4	4	4	4	4	4	4	4	4	4	4	4	4	4	4	4	4	4	4	4	4	4	4	4
1856	2026/4/7 21:43:21	79秒	微信	N/A	223.104.196.127(山东-济宁)	224	1	3	5	2	4	1	1	3	2	3	1	7	7	7	7	7	7	7	7	7	7	7	7	7	7	7	7	7	7	7	7	7	7	7	7	7	7	7	7	7	7	7	7
1857	2026/4/7 21:43:26	306秒	微信	N/A	112.224.190.252(山东-济南)	162	2	3	2	2	4	1	1	3	2	3	3	5	4	5	5	6	5	6	5	6	5	5	5	5	5	5	5	5	5	5	5	5	5	5	5	5	5	5	5	5	5	5	5
1858	2026/4/7 21:43:32	54秒	微信	N/A	223.99.163.165(山东-济南)	129	2	3	2	2	3	2	1	4	2	2	1	5	5	5	4	4	3	5	3	4	4	3	3	4	3	5	3	5	3	5	3	3	5	5	3	5	5	3	3	5	5	3	5
1859	2026/4/7 21:43:47	232秒	微信	N/A	223.104.196.184(山东-菏泽)	168	1	3	5	2	4	2	1	4	2	1	3	7	7	7	7	5	5	5	5	5	5	5	5	5	5	5	5	5	5	5	5	5	5	5	5	5	5	5	5	5	5	5	5
1860	2026/4/7 21:43:48	66秒	微信	N/A	112.224.228.174(山东-济南)	160	2	3	2	2	4	2	1	3	1	2	1	5	5	5	5	5	5	5	5	5	5	5	5	5	5	5	5	5	5	5	5	5	5	5	5	5	5	5	5	5	5	5	5
1861	2026/4/7 21:43:49	134秒	微信	N/A	39.144.109.131(山东-聊城)	126	2	3	2	2	4	1	1	2	1	2	3	4	4	4	4	4	4	4	4	4	4	4	4	4	4	4	4	4	4	3	3	4	4	4	4	4	4	4	4	4	4	4	4
1862	2026/4/7 21:43:57	77秒	微信	N/A	112.224.163.53(山东-济南)	91	1	3	2	2	4	2	2	4	2	2	2	3	3	3	3	3	3	3	3	3	2	3	3	3	3	3	3	3	3	3	3	3	3	3	3	2	3	2	3	2	3	2	3
1863	2026/4/7 21:44:00	257秒	微信	N/A	112.224.220.208(山东-济南)	161	2	3	3	2	2	2	2	2	2	1	3	5	5	5	5	6	5	5	5	5	5	5	5	5	5	5	5	5	5	5	5	5	5	5	5	5	5	5	5	5	5	5	5
1864	2026/4/7 21:44:00	221秒	微信	N/A	223.99.163.165(山东-济南)	104	2	3	2	2	4	1	1	1	2	1	1	5	4	3	4	3	2	2	2	3	3	2	3	3	3	3	3	6	4	4	3	3	4	3	3	3	3	3	3	4	4	3	3
1865	2026/4/7 21:44:09	74秒	微信	N/A	112.224.163.34(山东-济南)	128	2	3	2	2	2	2	2	4	2	2	1	4	4	4	4	4	4	4	4	4	4	4	4	4	4	4	4	4	4	4	4	4	4	4	4	4	4	4	4	4	4	4	4
1866	2026/4/7 21:44:11	120秒	微信	N/A	39.144.108.132(山东-东营)	137	2	3	3	2	4	3	1	1	1	2	3	5	5	4	4	5	5	4	4	4	4	5	4	4	4	5	4	4	4	4	5	4	5	3	5	4	3	4	4	5	5	4	4
1867	2026/4/7 21:44:26	181秒	微信	N/A	223.104.194.176(山东-济南)	128	2	3	5	2	2	1	1	3	2	2	3	4	4	4	4	4	4	4	4	4	4	4	4	4	4	4	4	4	4	4	4	4	4	4	4	4	4	4	4	4	4	4	4
1868	2026/4/7 21:44:34	62秒	微信	N/A	39.144.109.44(山东-聊城)	128	2	2	3	2	4	1	1	3	2	2	1	4	4	4	4	4	4	4	4	4	4	4	4	4	4	4	4	4	4	4	4	4	4	4	4	4	4	4	4	4	4	4	4
1869	2026/4/7 21:44:45	171秒	微信	N/A	223.104.194.146(山东-济南)	96	2	3	3	2	1	3	3	1	2	2	1	3	3	3	3	3	3	3	3	3	3	3	3	3	3	3	3	3	3	3	3	3	3	3	3	3	3	3	3	3	3	3	3
1870	2026/4/7 21:44:53	403秒	微信	N/A	112.224.191.8(山东-济南)	138	2	3	2	2	4	1	1	1	2	3	3	6	4	3	5	4	4	6	4	7	6	3	5	3	3	3	5	5	6	6	3	1	7	1	4	3	3	3	5	5	5	5	5
1871	2026/4/7 21:44:55	54秒	微信	N/A	39.144.109.188(山东-聊城)	224	1	1	1	1	1	3	3	2	2	1	2	7	7	7	7	7	7	7	7	7	7	7	7	7	7	7	7	7	7	7	7	7	7	7	7	7	7	7	7	7	7	7	7
1872	2026/4/7 21:45:10	126秒	微信	N/A	223.104.194.140(山东-济南)	224	1	3	2	2	2	2	2	4	2	1	1	7	7	7	7	7	7	7	7	7	7	7	7	7	7	7	7	7	7	7	7	7	7	7	7	7	7	7	7	7	7	7	7
1873	2026/4/7 21:45:20	58秒	微信	N/A	39.144.109.141(山东-聊城)	161	2	3	3	2	4	1	1	1	2	2	4	5	5	5	5	5	5	5	5	5	5	5	5	5	5	6	5	5	5	5	5	5	5	5	5	5	5	5	5	5	5	5	5
1874	2026/4/7 21:45:26	76秒	微信	N/A	223.104.194.136(山东-济南)	224	2	3	3	2	4	1	1	1	2	1	4	7	7	7	7	7	7	7	7	7	7	7	7	7	7	7	7	7	7	7	7	7	7	7	7	7	7	7	7	7	7	7	7
1875	2026/4/7 21:45:29	68秒	微信	N/A	112.224.217.163(山东-济南)	211	2	3	3	2	4	3	1	1	1	2	1	7	7	7	7	7	7	7	7	7	7	7	7	7	7	7	7	7	7	7	7	7	7	7	7	6	6	6	5	5	5	5	5
1876	2026/4/7 21:45:32	66秒	微信	N/A	39.82.171.247(山东-济南)	192	1	3	3	2	2	3	2	4	2	1	1	6	6	6	6	6	6	6	6	6	6	6	6	6	6	6	6	6	6	6	6	6	6	6	6	6	6	6	6	6	6	6	6
1877	2026/4/7 21:45:33	77秒	微信	N/A	223.160.164.20(山东-济南)	96	2	3	2	2	2	1	1	3	2	1	2	3	3	3	3	3	3	3	3	3	3	3	3	3	3	3	3	3	3	3	3	3	3	3	3	3	3	3	3	3	3	3	3
1878	2026/4/7 21:45:33	72秒	微信	N/A	112.224.224.52(山东-济南)	128	1	3	3	2	4	1	1	4	2	3	2	4	4	4	4	4	4	4	4	4	4	4	4	4	4	4	4	4	4	4	4	4	4	4	4	4	4	4	4	4	4	4	4
1879	2026/4/7 21:45:37	106秒	微信	N/A	223.99.163.164(山东-济南)	131	2	3	2	2	4	1	1	3	2	1	1	4	6	4	5	4	4	4	4	4	4	4	4	4	4	4	4	4	4	4	4	4	4	4	4	4	4	4	4	4	4	4	4
1880	2026/4/7 21:45:43	65秒	微信	N/A	223.104.194.160(山东-济南)	224	2	3	3	2	2	3	3	1	1	1	1	7	7	7	7	7	7	7	7	7	7	7	7	7	7	7	7	7	7	7	7	7	7	7	7	7	7	7	7	7	7	7	7
1881	2026/4/7 21:45:47	85秒	微信	N/A	39.144.109.167(山东-聊城)	217	1	3	3	2	4	1	1	1	1	1	1	7	7	7	7	7	6	7	7	7	7	7	7	7	7	7	7	6	7	6	6	7	6	7	7	7	6	7	7	7	6	7	7
1882	2026/4/7 21:45:49	109秒	微信	N/A	112.224.225.211(山东-济南)	224	2	3	2	2	4	2	2	2	1	1	1	7	7	7	7	7	7	7	7	7	7	7	7	7	7	7	7	7	7	7	7	7	7	7	7	7	7	7	7	7	7	7	7
1883	2026/4/7 21:46:01	172秒	微信	N/A	39.144.109.166(山东-聊城)	140	2	3	3	2	4	1	1	1	2	3	2	5	3	3	5	4	4	5	4	6	5	6	6	5	4	4	5	4	5	3	3	3	4	4	4	4	5	4	6	4	4	5	4
1884	2026/4/7 21:46:07	203秒	微信	N/A	112.224.141.127(山东-济南)	96	1	3	3	2	2	3	3	4	2	3	3	3	3	3	3	3	3	3	3	3	3	3	3	3	3	3	3	3	3	3	3	3	3	3	3	3	3	3	3	3	3	3	3
1885	2026/4/7 21:46:12	77秒	微信	N/A	111.55.120.47(山东-济南)	204	1	3	3	2	3	2	2	2	1	2	3	7	7	6	7	5	7	7	7	7	7	6	7	6	6	6	5	7	6	6	7	7	6	7	7	5	6	6	6	5	6	7	7
1886	2026/4/7 21:46:12	115秒	微信	N/A	112.224.218.8(山东-济南)	140	1	3	3	2	4	1	1	5	1	2	3	5	5	5	5	6	6	6	6	5	4	3	4	2	2	3	2	2	4	3	3	4	5	3	7	5	7	7	7	3	4	4	3
1887	2026/4/7 21:46:14	107秒	微信	N/A	223.104.194.174(山东-济南)	114	1	3	3	2	4	1	1	3	2	2	1	3	4	3	3	4	3	3	3	3	3	4	4	3	4	3	4	4	3	4	4	4	3	4	4	4	4	4	3	4	4	4	3
1888	2026/4/7 21:46:16	91秒	微信	N/A	223.104.194.189(山东-济南)	150	2	3	3	2	1	3	3	2	2	2	1	5	5	5	5	5	5	5	5	5	5	5	5	5	5	5	5	5	4	4	4	4	4	4	5	5	4	4	5	5	4	5	4
1889	2026/4/7 21:46:16	104秒	微信	N/A	39.144.109.170(山东-聊城)	146	2	3	3	2	4	1	1	1	2	2	1	4	5	4	5	3	5	4	4	5	4	5	4	5	6	5	4	6	5	4	4	5	4	5	4	6	4	5	4	5	4	4	5
1890	2026/4/7 21:46:19	106秒	微信	N/A	112.224.143.27(山东-济南)	128	2	3	3	2	1	3	2	2	2	2	4	4	4	4	4	4	4	4	4	4	4	4	4	4	4	4	4	4	4	4	4	4	4	4	4	4	4	4	4	4	4	4	4
1891	2026/4/7 21:46:21	97秒	微信	N/A	112.224.191.224(山东-济南)	224	2	3	5	1	4	1	1	4	2	2	1	7	7	7	7	7	7	7	7	7	7	7	7	7	7	7	7	7	7	7	7	7	7	7	7	7	7	7	7	7	7	7	7
1892	2026/4/7 21:46:21	111秒	微信	N/A	39.144.109.157(山东-聊城)	89	2	3	3	2	4	1	1	2	2	1	4	2	2	2	4	3	2	3	2	2	3	2	2	3	3	3	3	3	3	3	3	3	3	3	3	3	3	3	3	3	3	3	3
1893	2026/4/7 21:46:27	247秒	微信	N/A	39.144.110.2(山东-临沂)	166	2	3	2	2	2	2	2	3	2	2	3	4	4	4	4	4	4	4	4	5	6	6	6	5	5	5	5	7	6	5	5	4	6	7	6	6	7	7	7	5	4	5	4
1894	2026/4/7 21:46:37	94秒	微信	N/A	39.144.109.166(山东-聊城)	133	2	3	3	2	4	1	1	2	1	1	1	5	2	4	5	5	4	5	5	4	5	4	4	5	4	5	4	5	4	4	3	3	4	4	4	4	4	4	4	4	5	4	3
1895	2026/4/7 21:46:38	80秒	微信	N/A	112.53.79.11(山东-济南)	224	1	3	3	2	2	1	2	4	2	1	1	7	7	7	7	7	7	7	7	7	7	7	7	7	7	7	7	7	7	7	7	7	7	7	7	7	7	7	7	7	7	7	7
1896	2026/4/7 21:46:40	142秒	微信	N/A	39.144.109.59(山东-聊城)	160	1	3	3	2	4	1	2	3	2	3	3	5	5	5	5	5	5	5	5	5	5	5	5	5	5	5	5	5	5	5	5	5	5	5	5	5	5	5	5	5	5	5	5
1897	2026/4/7 21:46:49	263秒	微信	N/A	112.224.222.41(山东-济南)	208	1	3	3	2	2	3	3	1	1	1	3	7	7	7	7	7	7	7	7	7	7	7	7	6	6	6	6	6	6	6	6	6	6	6	6	7	7	6	7	7	7	7	4
1898	2026/4/7 21:46:55	147秒	微信	N/A	223.104.194.142(山东-济南)	157	1	1	5	2	2	2	2	3	1	1	1	4	4	6	6	5	4	6	5	4	5	5	5	4	6	5	5	5	5	5	4	3	4	4	4	5	5	7	6	5	6	6	4
1899	2026/4/7 21:46:55	52秒	微信	N/A	223.104.194.129(山东-济南)	154	2	3	3	2	4	1	1	1	2	3	3	4	4	4	4	4	4	4	4	4	5	5	5	5	4	5	5	5	5	6	6	5	6	6	5	4	5	6	6	4	5	5	5
1900	2026/4/7 21:46:55	88秒	微信	N/A	112.224.220.135(山东-济南)	219	1	3	3	2	2	1	1	4	2	1	1	7	7	7	7	7	7	7	7	7	7	7	7	7	7	7	7	7	7	7	7	7	6	6	6	7	7	7	6	7	7	7	6
1901	2026/4/7 21:47:04	65秒	微信	N/A	223.104.194.165(山东-济南)	224	1	3	3	2	2	2	1	3	2	2	1	7	7	7	7	7	7	7	7	7	7	7	7	7	7	7	7	7	7	7	7	7	7	7	7	7	7	7	7	7	7	7	7
1902	2026/4/7 21:47:07	146秒	微信	N/A	218.58.41.107(山东-济南)	148	2	1	5	2	1	3	3	4	2	3	4	2	2	2	5	7	7	7	7	5	5	5	5	5	5	5	5	4	4	4	4	6	6	3	6	5	6	6	6	3	2	2	2
1903	2026/4/7 21:47:08	164秒	微信	N/A	112.230.183.107(山东-济南)	151	1	3	3	2	4	1	1	5	2	3	1	4	3	6	7	6	6	7	5	6	6	7	6	5	5	3	6	6	6	4	3	2	6	2	4	4	4	4	4	4	2	5	3
1904	2026/4/7 21:47:16	138秒	微信	N/A	223.99.163.165(山东-济南)	91	2	1	3	2	2	3	3	5	2	2	4	1	1	1	7	5	1	7	4	7	7	4	1	4	2	2	2	6	4	3	2	1	1	1	1	1	2	2	2	3	2	2	2
1905	2026/4/7 21:47:26	114秒	微信	N/A	39.144.109.142(山东-聊城)	160	1	3	3	2	4	1	1	2	2	2	1	5	5	5	5	5	5	5	5	5	5	5	5	5	5	5	5	5	5	5	5	5	5	5	5	5	5	5	5	5	5	5	5
1906	2026/4/7 21:47:33	632秒	微信	N/A	112.224.219.119(山东-济南)	147	1	3	3	2	4	1	1	3	2	2	1	5	4	5	5	4	3	3	4	5	5	5	5	5	5	5	5	5	5	6	4	3	4	2	2	5	5	5	5	5	6	6	6
1907	2026/4/7 21:47:34	99秒	微信	N/A	180.98.34.11(江苏-苏州)	224	1	3	3	2	2	2	2	2	1	2	3	7	7	7	7	7	7	7	7	7	7	7	7	7	7	7	7	7	7	7	7	7	7	7	7	7	7	7	7	7	7	7	7
1908	2026/4/7 21:47:36	98秒	微信	N/A	223.104.194.137(山东-济南)	128	2	3	3	2	4	1	1	2	1	2	1	4	4	4	4	4	4	4	4	4	4	4	4	4	4	4	4	4	4	4	4	4	4	4	4	4	4	4	4	4	4	4	4
1909	2026/4/7 21:47:58	226秒	微信	N/A	223.104.194.134(山东-济南)	155	2	3	3	2	4	2	2	2	2	1	1	5	5	5	5	5	5	5	5	4	4	5	5	5	5	5	5	5	5	5	5	4	5	4	4	5	5	5	5	5	5	5	5
1910	2026/4/7 21:48:03	219秒	微信	N/A	39.144.109.169(山东-聊城)	128	2	3	3	2	2	2	2	5	2	2	2	4	4	4	4	4	4	4	4	4	4	4	4	4	4	4	4	4	4	4	4	4	4	4	4	4	4	4	4	4	4	4	4
1911	2026/4/7 21:48:33	349秒	微信	N/A	112.224.217.144(山东-济南)	135	2	3	3	2	4	1	1	1	2	1	3	4	2	3	5	5	4	5	6	6	4	4	6	4	5	4	3	6	7	1	2	1	4	3	4	4	4	4	4	5	5	5	6
1912	2026/4/7 21:48:36	168秒	微信	N/A	218.58.41.203(山东-济南)	105	2	3	3	2	2	1	2	1	2	2	1	5	3	3	5	4	4	4	4	3	4	4	4	3	4	3	4	4	3	3	3	2	3	2	3	3	2	2	2	3	3	3	3
1913	2026/4/7 21:49:03	226秒	微信	N/A	112.224.223.252(山东-济南)	182	2	3	3	2	4	2	1	3	2	2	3	7	7	6	6	5	5	5	5	6	6	6	6	6	6	6	6	6	6	6	6	5	6	5	7	5	4	4	4	6	6	6	6
1914	2026/4/7 21:49:03	75秒	微信	N/A	112.53.79.14(山东-济南)	166	2	3	1	2	4	4	2	1	1	1	1	7	7	7	7	7	6	5	4	2	3	4	5	5	5	5	5	5	6	4	7	7	1	7	1	5	3	5	3	7	7	7	7
1915	2026/4/7 21:49:23	277秒	微信	N/A	112.53.79.12(山东-济南)	182	2	3	2	2	4	1	1	1	1	2	1	7	3	4	6	5	6	6	4	7	7	4	4	6	6	6	6	7	7	7	6	4	4	4	4	7	7	7	7	6	6	6	6
1916	2026/4/7 21:49:24	152秒	微信	N/A	112.224.222.245(山东-济南)	64	1	3	2	2	2	3	2	5	1	3	1	2	2	2	2	2	2	2	2	2	2	2	2	2	2	2	2	2	2	2	2	2	2	2	2	2	2	2	2	2	2	2	2
1917	2026/4/7 21:49:30	338秒	微信	N/A	112.224.190.198(山东-济南)	164	2	3	3	2	3	1	1	1	2	2	1	6	5	4	6	6	6	5	5	5	5	5	4	5	5	5	5	5	4	5	5	5	4	4	4	6	6	6	6	6	6	6	4
1918	2026/4/7 21:49:31	263秒	微信	N/A	112.224.226.230(山东-济南)	145	2	3	2	2	2	1	1	1	1	2	2	6	5	4	5	6	6	6	6	6	6	3	4	6	6	6	4	6	6	6	3	2	2	2	2	4	4	3	5	4	4	4	3
1919	2026/4/7 21:49:38	154秒	微信	N/A	112.224.225.206(山东-济南)	109	2	3	2	2	3	3	1	3	2	3	1	4	4	4	3	1	1	1	4	5	5	5	5	3	2	2	4	6	7	6	4	2	2	2	4	2	1	1	3	4	4	4	4
1920	2026/4/7 21:49:38	184秒	微信	N/A	39.144.109.147(山东-聊城)	129	2	3	3	2	4	1	1	1	2	2	3	4	4	3	4	4	4	4	4	3	4	5	4	4	4	4	4	4	4	4	4	4	4	5	5	4	4	4	4	4	4	4	4
1921	2026/4/7 21:49:49	78秒	微信	N/A	223.104.194.146(山东-济南)	224	2	3	3	2	4	1	1	2	2	2	1	7	7	7	7	7	7	7	7	7	7	7	7	7	7	7	7	7	7	7	7	7	7	7	7	7	7	7	7	7	7	7	7
1922	2026/4/7 21:49:53	73秒	微信	N/A	39.144.109.180(山东-聊城)	128	1	3	3	2	3	1	1	2	1	2	4	4	4	4	4	4	4	4	4	4	4	4	4	4	4	4	4	4	4	4	4	4	4	4	4	4	4	4	4	4	4	4	4
1923	2026/4/7 21:50:04	128秒	微信	N/A	112.224.217.200(山东-济南)	161	1	3	3	2	4	1	1	1	2	2	1	5	6	5	5	5	5	5	5	5	5	5	5	5	5	5	5	5	5	5	5	5	5	5	5	5	5	5	5	5	5	5	5
1924	2026/4/7 21:50:21	156秒	微信	N/A	223.104.194.161(山东-济南)	128	2	3	5	2	4	1	1	3	2	2	3	4	4	4	4	4	4	4	4	4	4	4	4	4	4	4	4	4	4	4	4	4	4	4	4	4	4	4	4	4	4	4	4
1925	2026/4/7 21:50:38	75秒	微信	N/A	112.224.221.33(山东-济南)	128	2	3	2	2	2	1	1	3	2	1	3	4	4	4	4	4	4	4	4	4	4	4	4	4	4	4	4	4	4	4	4	4	4	4	4	4	4	4	4	4	4	4	4
1926	2026/4/7 21:50:52	471秒	微信	N/A	112.224.228.86(山东-济南)	114	2	3	3	2	1	1	1	3	2	1	3	4	3	2	5	3	4	4	4	4	4	3	4	4	5	4	4	6	3	3	3	2	5	2	3	3	4	3	5	3	2	4	2
1927	2026/4/7 21:51:12	297秒	微信	N/A	112.224.226.111(山东-济南)	178	2	3	3	2	2	2	2	1	2	2	1	7	5	5	6	5	5	7	6	7	7	7	7	5	4	4	5	5	7	5	4	4	7	5	5	5	4	6	7	5	5	7	5
1928	2026/4/7 21:51:18	56秒	微信	N/A	112.224.1.205(山东-济南)	192	1	3	3	2	1	3	3	1	1	1	1	6	6	6	6	6	6	6	6	6	6	6	6	6	6	6	6	6	6	6	6	6	6	6	6	6	6	6	6	6	6	6	6
1929	2026/4/7 21:51:46	96秒	微信	N/A	112.224.227.48(山东-济南)	160	2	3	3	2	1	3	2	2	2	1	1	5	5	5	5	5	5	5	5	5	5	5	5	5	5	5	5	5	5	5	5	5	5	5	5	5	5	5	5	5	5	5	5
1930	2026/4/7 21:51:48	55秒	微信	N/A	39.144.109.178(山东-聊城)	128	2	3	2	2	2	1	1	3	2	1	3	4	4	4	4	4	4	4	4	4	4	4	4	4	4	4	4	4	4	4	4	4	4	4	4	4	4	4	4	4	4	4	4
1931	2026/4/7 21:51:51	273秒	微信	N/A	39.144.109.165(山东-聊城)	181	2	3	3	2	4	1	1	2	2	1	1	7	7	6	7	4	4	6	5	7	7	7	7	7	7	7	7	7	7	7	7	2	2	2	2	5	5	5	5	6	5	6	6
1932	2026/4/7 21:52:32	72秒	微信	N/A	223.104.194.166(山东-济南)	128	2	4	5	2	4	2	1	2	2	3	4	4	4	4	4	4	4	4	4	4	4	4	4	4	4	4	4	4	4	4	4	4	4	4	4	4	4	4	4	4	4	4	4
1933	2026/4/7 21:52:33	472秒	微信	N/A	112.224.160.37(山东-济南)	117	1	1	3	1	1	2	3	3	1	2	1	3	1	4	7	4	1	7	4	1	4	1	4	4	4	4	4	7	3	3	3	3	3	1	2	3	7	4	7	3	3	4	4
1934	2026/4/7 21:52:46	82秒	微信	N/A	223.160.161.237(山东-济南)	164	2	1	5	2	2	2	2	1	1	1	1	6	6	6	6	5	5	5	5	5	5	5	5	5	5	5	5	5	5	5	5	5	5	5	5	5	5	5	5	5	5	5	5
1935	2026/4/7 21:52:54	72秒	微信	N/A	39.144.109.167(山东-聊城)	96	1	2	2	1	2	1	2	4	2	3	1	3	3	3	3	3	3	3	3	3	3	3	3	3	3	3	3	3	3	3	3	3	3	3	3	3	3	3	3	3	3	3	3
1936	2026/4/7 21:52:55	50秒	微信	N/A	218.58.41.240(山东-济南)	128	2	3	3	2	2	2	2	1	1	2	3	4	4	4	4	4	4	4	4	4	4	4	4	4	4	4	4	4	4	4	4	4	4	4	4	4	4	4	4	4	4	4	4
1937	2026/4/7 21:52:56	51秒	微信	N/A	39.144.109.162(山东-聊城)	224	2	3	3	1	4	2	2	1	1	1	1	7	7	7	7	7	7	7	7	7	7	7	7	7	7	7	7	7	7	7	7	7	7	7	7	7	7	7	7	7	7	7	7
1938	2026/4/7 21:52:57	74秒	微信	N/A	112.224.227.223(山东-济南)	196	2	3	3	2	1	3	2	2	1	2	1	6	5	6	6	6	6	6	6	6	6	6	6	6	6	6	6	6	6	6	6	6	6	7	6	6	7	6	6	6	7	7	7
1939	2026/4/7 21:53:36	50秒	微信	N/A	112.224.162.241(山东-济南)	224	1	1	1	2	4	1	1	1	1	1	1	7	7	7	7	7	7	7	7	7	7	7	7	7	7	7	7	7	7	7	7	7	7	7	7	7	7	7	7	7	7	7	7
1940	2026/4/7 21:53:42	139秒	微信	N/A	39.144.109.168(山东-聊城)	155	2	1	2	2	4	1	1	1	2	3	1	6	4	3	6	2	3	6	4	5	5	5	5	4	5	5	4	6	6	6	6	4	5	4	5	5	5	4	6	6	5	5	5
1941	2026/4/7 21:53:56	323秒	微信	N/A	112.224.228.227(山东-济南)	193	2	3	3	2	1	3	3	1	2	1	4	6	2	5	7	4	6	6	6	7	6	7	7	7	6	7	6	7	7	5	5	6	6	6	4	6	6	6	7	6	7	7	7
1942	2026/4/7 21:54:00	75秒	微信	N/A	112.224.223.236(山东-济南)	179	1	1	3	2	2	1	1	3	1	1	1	5	6	5	5	5	5	6	6	4	6	5	6	6	4	5	7	6	7	5	6	5	6	6	5	5	6	7	7	7	5	5	5
1943	2026/4/7 21:54:15	50秒	微信	N/A	112.224.224.1(山东-济南)	224	1	2	3	2	2	3	2	4	1	1	1	7	7	7	7	7	7	7	7	7	7	7	7	7	7	7	7	7	7	7	7	7	7	7	7	7	7	7	7	7	7	7	7
1944	2026/4/7 21:54:21	104秒	微信	N/A	112.232.212.231(山东-济南)	128	2	3	2	2	2	2	1	4	2	3	4	4	4	4	4	4	4	4	4	4	4	4	4	4	4	4	4	4	4	4	4	4	4	4	4	4	4	4	4	4	4	4	4
1945	2026/4/7 21:54:36	144秒	微信	N/A	112.224.227.134(山东-济南)	163	2	3	2	2	3	1	1	1	1	2	1	6	5	4	5	5	6	6	6	6	6	6	5	4	4	4	4	5	5	5	6	5	5	5	5	5	5	5	5	5	5	5	5
1946	2026/4/7 21:54:59	133秒	微信	N/A	112.53.79.11(山东-济南)	128	2	1	3	2	2	1	1	4	2	2	2	4	4	4	4	4	4	4	4	4	4	4	4	4	4	4	4	4	4	4	4	4	4	4	4	4	4	4	4	4	4	4	4
1947	2026/4/7 21:55:00	72秒	微信	N/A	39.144.109.174(山东-聊城)	167	2	1	3	2	4	1	1	1	2	2	1	6	6	6	6	6	4	5	4	6	6	3	3	5	6	4	5	5	4	6	6	5	3	5	6	6	6	7	6	5	6	5	5
1948	2026/4/7 21:55:02	90秒	微信	N/A	112.232.212.226(山东-济南)	87	2	1	3	2	2	3	3	4	1	1	4	1	1	1	1	3	2	2	2	4	4	2	3	3	2	3	2	3	2	3	2	3	3	2	3	3	3	4	4	4	4	4	4
1949	2026/4/7 21:55:02	221秒	微信	N/A	112.224.190.213(山东-济南)	207	2	3	3	2	3	3	3	3	1	2	1	7	7	7	7	7	7	7	4	7	7	7	7	7	7	7	7	6	6	7	7	6	6	5	6	6	6	6	6	6	6	7	6
1950	2026/4/7 21:55:08	142秒	微信	N/A	223.104.194.138(山东-济南)	164	2	3	2	2	4	1	1	3	2	2	1	6	6	6	6	5	5	5	5	5	5	5	5	5	5	5	5	5	5	5	5	5	5	5	5	5	5	5	5	5	5	5	5
1951	2026/4/7 21:55:24	171秒	微信	N/A	112.224.143.17(山东-济南)	128	2	3	2	2	4	1	1	2	2	3	1	4	4	4	4	4	4	4	4	4	4	4	4	4	4	4	4	4	4	4	4	4	4	4	4	4	4	4	4	4	4	4	4
1952	2026/4/7 21:55:25	136秒	微信	N/A	223.99.163.165(山东-济南)	127	2	3	2	2	4	3	1	4	2	2	3	4	4	3	4	4	4	4	4	4	4	4	4	4	4	4	4	4	4	4	4	4	4	4	4	4	4	4	4	4	4	4	4
1953	2026/4/7 21:55:32	98秒	微信	N/A	39.144.109.158(山东-聊城)	224	2	3	3	2	2	1	1	3	2	1	1	7	7	7	7	7	7	7	7	7	7	7	7	7	7	7	7	7	7	7	7	7	7	7	7	7	7	7	7	7	7	7	7
1954	2026/4/7 21:55:44	183秒	微信	N/A	112.224.163.185(山东-济南)	143	2	1	3	2	2	2	2	1	1	2	4	7	4	4	7	4	3	5	4	4	5	4	5	4	5	5	4	4	5	4	5	4	5	4	5	4	4	4	4	4	5	4	4
1955	2026/4/7 21:55:53	129秒	微信	N/A	223.104.194.136(山东-济南)	128	2	1	5	2	3	2	2	2	2	1	1	4	4	4	4	4	4	4	4	4	4	4	4	4	4	4	4	4	4	4	4	4	4	4	4	4	4	4	4	4	4	4	4
1956	2026/4/7 21:55:55	77秒	微信	N/A	112.53.79.11(山东-济南)	192	2	1	3	2	2	3	3	4	1	2	1	6	6	6	6	6	6	6	6	6	6	6	6	6	6	6	6	6	6	6	6	6	6	6	6	6	6	6	6	6	6	6	6
1957	2026/4/7 21:56:09	43秒	微信	N/A	223.104.194.165(山东-济南)	95	2	1	3	2	1	3	3	2	1	1	1	2	3	3	3	3	3	3	3	3	3	3	3	3	3	3	3	3	3	3	3	3	3	3	3	3	3	3	3	3	3	3	3
1958	2026/4/7 21:56:09	145秒	微信	N/A	39.144.109.161(山东-聊城)	146	1	1	3	2	2	3	3	1	2	1	4	6	5	6	6	5	5	5	5	4	5	5	4	5	4	5	4	5	4	5	4	4	3	5	3	5	3	5	3	5	3	5	5
1959	2026/4/7 21:56:40	428秒	微信	N/A	112.224.226.18(山东-济南)	125	2	3	3	2	4	1	1	5	2	3	1	4	4	4	4	4	4	4	4	4	4	4	4	4	4	4	4	4	4	4	4	4	4	4	4	4	4	3	3	3	5	3	4
1960	2026/4/7 21:56:40	231秒	微信	N/A	223.104.196.110(山东-济宁)	125	2	3	3	2	3	1	1	4	2	2	1	5	5	3	4	4	4	4	4	3	4	4	4	3	4	4	5	5	5	4	3	4	3	4	4	4	4	3	3	3	4	4	4
1961	2026/4/7 21:56:41	198秒	微信	N/A	223.104.194.179(山东-济南)	224	2	1	3	2	2	1	2	3	2	1	4	7	7	7	7	7	7	7	7	7	7	7	7	7	7	7	7	7	7	7	7	7	7	7	7	7	7	7	7	7	7	7	7
1962	2026/4/7 21:57:09	165秒	微信	N/A	112.53.79.12(山东-济南)	160	2	1	3	2	2	3	3	2	1	2	4	4	3	5	5	5	5	5	4	4	4	4	4	4	4	4	4	5	5	4	4	4	5	5	4	7	7	7	7	7	7	7	7
1963	2026/4/7 21:57:42	81秒	微信	N/A	112.53.79.12(山东-济南)	96	2	3	2	2	2	1	1	3	2	1	1	3	3	3	3	3	3	3	3	3	3	3	3	3	3	3	3	3	3	3	3	3	3	3	3	3	3	3	3	3	3	3	3
1964	2026/4/7 21:57:46	81秒	微信	N/A	39.144.109.146(山东-聊城)	136	2	3	3	2	4	3	1	2	2	2	1	5	5	5	5	5	5	5	5	4	4	4	4	4	4	4	4	4	4	4	4	4	4	4	4	4	4	4	4	4	4	4	4
1965	2026/4/7 21:57:56	96秒	微信	N/A	39.144.109.136(山东-聊城)	128	1	3	3	2	2	1	1	2	1	2	4	4	4	4	4	4	4	4	4	4	4	4	4	4	4	4	4	4	4	4	4	4	4	4	4	4	4	4	4	4	4	4	4
1966	2026/4/7 21:57:59	381秒	微信	N/A	223.104.194.186(山东-济南)	147	2	3	3	2	2	2	2	2	2	3	3	4	5	4	5	4	4	5	5	5	5	6	4	4	4	4	5	6	5	4	4	3	5	3	4	5	5	5	5	5	5	5	5
1967	2026/4/7 21:58:37	136秒	微信	N/A	39.144.109.131(山东-聊城)	224	1	3	3	2	2	2	2	5	2	1	3	7	7	7	7	7	7	7	7	7	7	7	7	7	7	7	7	7	7	7	7	7	7	7	7	7	7	7	7	7	7	7	7
1968	2026/4/7 21:58:43	115秒	微信	N/A	112.224.222.38(山东-济南)	224	1	3	3	2	4	2	2	5	2	2	1	7	7	7	7	7	7	7	7	7	7	7	7	7	7	7	7	7	7	7	7	7	7	7	7	7	7	7	7	7	7	7	7
1969	2026/4/7 21:58:50	797秒	微信	N/A	112.53.79.12(山东-济南)	224	1	3	3	2	4	1	1	5	2	1	3	7	7	7	7	7	7	7	7	7	7	7	7	7	7	7	7	7	7	7	7	7	7	7	7	7	7	7	7	7	7	7	7
1970	2026/4/7 21:59:07	97秒	微信	N/A	223.104.194.182(山东-济南)	128	2	3	2	2	4	2	2	1	2	1	1	4	4	4	4	4	4	4	4	4	4	4	4	4	4	4	4	4	4	4	4	4	4	4	4	4	4	4	4	4	4	4	4
1971	2026/4/7 22:00:14	80秒	微信	N/A	112.53.79.13(山东-济南)	128	2	3	2	2	4	1	1	4	2	2	1	4	4	4	4	4	4	4	4	4	4	4	4	4	4	4	4	4	4	4	4	4	4	4	4	4	4	4	4	4	4	4	4
1972	2026/4/7 22:00:14	218秒	微信	N/A	223.104.194.160(山东-济南)	221	1	3	3	2	3	3	1	4	1	1	3	7	4	7	7	7	7	7	7	7	7	7	7	7	7	7	7	7	7	7	7	7	7	7	7	7	7	7	7	7	7	7	7
1973	2026/4/7 22:00:23	347秒	微信	N/A	112.53.79.14(山东-济南)	99	2	3	5	2	4	1	1	3	2	2	1	3	2	2	6	2	2	2	6	2	6	2	2	2	2	2	2	6	3	3	3	3	3	3	3	3	3	3	6	3	3	3	3
1974	2026/4/7 22:00:26	289秒	微信	N/A	39.144.109.128(山东-聊城)	168	2	1	3	2	4	1	1	3	1	1	1	7	4	6	7	6	6	6	6	7	6	6	6	5	5	5	6	6	4	5	4	3	5	5	5	5	4	4	5	5	5	5	4
1975	2026/4/7 22:00:36	78秒	微信	N/A	112.224.222.205(山东-济南)	128	1	3	1	2	3	3	1	1	2	1	1	4	4	4	4	4	4	4	4	4	4	4	4	4	4	4	4	4	4	4	4	4	4	4	4	4	4	4	4	4	4	4	4
1976	2026/4/7 22:01:05	76秒	微信	N/A	39.144.109.189(山东-聊城)	160	2	3	3	2	2	2	1	1	2	2	1	5	5	5	5	5	5	5	5	5	5	5	5	5	5	5	5	5	5	5	5	5	5	5	5	5	5	5	5	5	5	5	5
1977	2026/4/7 22:02:48	154秒	微信	N/A	112.224.161.191(山东-济南)	139	1	3	2	2	4	1	1	5	2	1	4	4	3	6	5	5	5	4	5	4	6	5	4	4	4	3	5	5	6	5	3	3	5	3	4	4	3	3	6	4	4	5	4
1978	2026/4/7 22:03:11	107秒	微信	N/A	112.53.79.13(山东-济南)	128	1	1	3	2	4	1	1	2	1	1	4	4	4	4	4	4	4	4	4	4	4	4	4	4	4	4	4	4	4	4	4	4	4	4	4	4	4	4	4	4	4	4	4
1979	2026/4/7 22:03:26	160秒	微信	N/A	39.144.109.133(山东-聊城)	160	1	3	3	2	4	1	1	1	2	1	1	5	5	5	5	5	5	5	5	5	5	5	5	5	5	5	5	5	5	5	5	5	5	5	5	5	5	5	5	5	5	5	5
1980	2026/4/7 22:04:12	62秒	微信	N/A	112.224.226.11(山东-济南)	224	2	3	5	2	2	2	2	1	1	1	3	7	7	7	7	7	7	7	7	7	7	7	7	7	7	7	7	7	7	7	7	7	7	7	7	7	7	7	7	7	7	7	7
1981	2026/4/7 22:05:27	91秒	微信	N/A	223.99.163.166(山东-济南)	128	1	1	3	2	2	2	2	3	2	3	4	4	4	4	4	4	4	4	4	4	4	4	4	4	4	4	4	4	4	4	4	4	4	4	4	4	4	4	4	4	4	4	4
1982	2026/4/7 22:06:21	82秒	微信	N/A	112.53.79.14(山东-济南)	224	2	3	3	2	4	1	1	1	1	1	3	7	7	7	7	7	7	7	7	7	7	7	7	7	7	7	7	7	7	7	7	7	7	7	7	7	7	7	7	7	7	7	7
1983	2026/4/7 22:06:23	71秒	微信	N/A	112.53.79.11(山东-济南)	184	2	3	2	2	4	1	1	2	2	3	4	6	6	6	6	6	6	6	6	6	6	6	6	6	6	6	6	6	6	6	6	6	6	6	6	5	5	5	5	5	5	5	5
1984	2026/4/7 22:06:32	70秒	微信	N/A	112.224.224.117(山东-济南)	96	2	3	2	2	3	2	1	3	2	2	1	3	3	3	3	3	3	3	3	3	3	3	3	3	3	3	3	3	3	3	3	3	3	3	3	3	3	3	3	3	3	3	3
1985	2026/4/7 22:06:33	90秒	微信	N/A	39.144.109.170(山东-聊城)	68	2	1	3	2	4	1	1	5	2	2	1	2	2	2	2	2	2	2	2	2	2	2	2	2	2	2	2	2	2	3	3	3	3	2	2	2	2	2	2	2	2	2	2
1986	2026/4/7 22:06:35	108秒	微信	N/A	112.224.190.171(山东-济南)	92	2	3	2	2	4	1	1	1	2	1	4	2	1	2	2	4	3	3	3	3	3	3	3	3	3	3	3	3	3	3	3	3	3	3	3	3	3	3	3	3	3	3	3
1987	2026/4/7 22:07:18	73秒	微信	N/A	39.144.102.120(吉林-长春)	224	1	3	2	2	1	2	2	2	1	1	3	7	7	7	7	7	7	7	7	7	7	7	7	7	7	7	7	7	7	7	7	7	7	7	7	7	7	7	7	7	7	7	7
1988	2026/4/7 22:07:29	89秒	微信	N/A	39.144.109.164(山东-聊城)	148	2	1	3	2	1	3	3	5	1	3	4	1	1	1	7	1	1	1	1	1	1	1	1	7	7	7	7	7	7	7	7	7	7	7	7	6	6	4	4	7	7	7	5
1989	2026/4/7 22:08:04	72秒	微信	N/A	112.224.225.129(山东-济南)	224	2	1	3	2	2	1	1	4	2	1	1	7	7	7	7	7	7	7	7	7	7	7	7	7	7	7	7	7	7	7	7	7	7	7	7	7	7	7	7	7	7	7	7
1990	2026/4/7 22:08:32	203秒	微信	N/A	39.144.109.151(山东-聊城)	140	2	1	2	2	2	3	2	1	1	1	4	4	5	4	5	5	3	4	4	5	4	5	3	4	5	4	5	4	4	5	4	4	5	4	5	4	5	4	5	5	4	5	4
1991	2026/4/7 22:08:47	198秒	微信	N/A	113.122.145.106(山东-日照)	108	2	4	5	1	4	1	1	2	2	1	3	4	4	4	5	3	3	3	3	3	3	3	3	4	4	3	3	4	3	4	4	3	3	3	3	3	3	3	3	4	3	3	4
1992	2026/4/7 22:09:50	106秒	微信	N/A	223.104.194.155(山东-济南)	219	2	1	3	2	4	1	1	5	2	2	4	7	7	7	7	7	7	5	6	6	7	7	7	7	7	7	7	6	7	7	7	7	7	7	7	7	7	7	7	7	7	7	7
1993	2026/4/7 22:10:21	894秒	微信	N/A	112.53.79.13(山东-济南)	97	2	1	3	2	4	3	2	2	2	2	4	1	1	5	5	4	4	7	4	2	5	2	5	2	2	2	3	5	2	4	1	1	4	3	4	4	2	2	3	2	2	2	2
1994	2026/4/7 22:11:05	73秒	微信	N/A	223.104.194.164(山东-济南)	128	2	3	3	2	4	1	1	2	2	3	4	4	4	4	4	4	4	4	4	4	4	4	4	4	4	4	4	4	4	4	4	4	4	4	4	4	4	4	4	4	4	4	4
1995	2026/4/7 22:11:51	117秒	微信	N/A	223.104.194.152(山东-济南)	186	1	3	3	2	2	3	3	3	1	1	2	4	4	5	4	6	6	6	6	7	6	6	6	6	6	6	6	6	6	6	6	6	6	6	6	6	6	6	6	6	6	6	6
1996	2026/4/7 22:12:45	54秒	微信	N/A	112.224.161.121(山东-济南)	128	2	1	5	2	4	2	2	4	2	2	1	4	4	4	4	4	4	4	4	4	4	4	4	4	4	4	4	4	4	4	4	4	4	4	4	4	4	4	4	4	4	4	4
1997	2026/4/7 22:13:37	138秒	微信	N/A	112.224.190.154(山东-济南)	128	2	3	5	2	2	3	3	3	1	2	1	4	3	4	5	4	4	4	4	4	4	4	4	4	4	4	4	4	4	4	4	4	4	4	4	4	4	4	4	4	4	4	4
1998	2026/4/7 22:14:21	378秒	微信	N/A	39.82.244.130(山东-济南)	121	2	3	2	2	4	1	1	2	2	2	3	5	3	3	3	3	3	3	4	6	6	5	5	4	4	4	3	4	5	4	2	2	2	2	2	5	4	4	6	5	4	4	2
1999	2026/4/7 22:17:18	91秒	微信	N/A	182.32.4.184(山东-济南)	132	2	4	2	2	2	3	3	3	2	2	1	4	4	4	4	4	4	4	4	5	5	5	5	4	4	4	4	4	4	4	4	4	4	4	4	4	4	4	4	4	4	4	4
[truncated: 122 more rows]
[truncated: 1 more columns]
