# Supplementary material
Source: Research Square preprint supplement (doi:10.21203/rs.3.rs-9812393/v1)
Supplement: Supplementary file 2 [file 155389c1447d94ed300687d5.docx]

**Appendix**

**Appendix A**

Table A1 presents the variable codes corresponding to the correlation analysis in Table 6. These codes are used to identify the ten core variables included in the correlation matrix.

**Table A1. Variable Codes Used in the Correlation Matrix**

| **Number** | **Variable Name** |
| --- | --- |
| 1 | Overall career planning |
| 2 | Career exploration |
| 3 | Career goal clarity |
| 4 | Career planning execution |
| 5 | Overall learning engagement |
| 6 | Cognitive engagement |
| 7 | Behavioral engagement |
| 8 | Practical engagement |
| 9 | Professional identity |
| 10 | Academic self-efficacy |

**Appendix B**

**Table B1. Heterogeneity Analysis Results by Undergraduate Type**

| **Variable** | **Model 9: Learning Engagement** |
| --- | --- |
| Career planning | 0.9075***  (0.0203) |
| Undergraduate type | 0.0314  (0.0587) |
| Career planning × Undergraduate type | -0.0220  (0.0248) |
| Controls | Yes |
| R² | 0.8366 |
| Adj. R² | 0.8342 |
| N | 2100 |

*Note: Robust standard errors in parentheses; ***, **, * denote significance at the 1%, 5%, and 10% levels, respectively. The interaction term coefficient does not reach statistical significance (p = 0.374), indicating that the moderating effect of undergraduate type on the relationship between career planning and learning engagement is not significant.*

To further test whether the effect of career planning on learning engagement differs by undergraduate type, this paper introduces an interaction term between career planning and undergraduate type into the baseline regression model. As shown in Appendix Table B1, the main effect of career planning remains significantly positive, while the coefficient on the interaction term between career planning and undergraduate type is -0.0220, which does not reach statistical significance (p = 0.374), indicating that the positive effect of career planning on learning engagement does not differ significantly between vocational undergraduate and applied undergraduate students. This study, therefore, concludes that career planning, as an important factor influencing learning engagement, has a broadly universal positive effect that does not vary substantially with undergraduate type.
