# Supplementary material
Source: Research Square preprint supplement (doi:10.21203/rs.3.rs-9812393/v1)
Supplement: Supplementary file 3 [file 28403938fd4acfce9761f5a3.docx]

**Supplementary File A: Survey Instruments and Data Collection Protocol**

**Study title: Exploring the effect of career planning on learning engagement: evidence from vocational and applied undergraduates in China**

Purpose: This file documents the survey instrument, questionnaire administration procedure, and data collection protocol used in the study. It is prepared as an anonymized supplementary document for peer review.

**1. Overview of the Survey Instrument**

The study used the Student Career Planning and Learning Behavior Survey Questionnaire. The instrument covered basic demographic and educational background information, career planning, learning engagement, professional identity, academic self-efficacy, and one optional open-ended feedback question. The instrument was developed by integrating and locally revising established measurement frameworks in line with the learning contexts of vocational undergraduate and applied undergraduate students.

The career planning section was informed by career development and career maturity frameworks; the learning engagement section was informed by learning process and student engagement frameworks; the professional identity and academic self-efficacy sections were adapted from relevant higher-education measurement scales. The questionnaire was not copied directly from a single existing scale; instead, items were selected, integrated, and revised for the target population and research purpose.

No interviews were conducted in this study. Therefore, no interview guide or interview protocol was used.

**2. Target Participants and Eligibility**

Target population: Undergraduate students enrolled at a local applied university in Shandong Province, China, including vocational undergraduate students and applied undergraduate students.

Age range: The target participants were adult undergraduate students, generally aged 18-22.

Inclusion criteria: Students enrolled in relevant undergraduate programs who were able to understand the questionnaire instructions and voluntarily completed the anonymous survey.

Exclusion criteria: Questionnaires with extremely short response times and uniform responses across all core scale items, as well as exact duplicate responses, were excluded during data cleaning.

**3. Data Collection Procedure**

| **Protocol element** | **Description** |
| --- | --- |
| Administration mode | The questionnaire was distributed to students in an anonymous form. Respondents completed the questionnaire independently based on their actual situation. |
| Voluntary participation | Participation was voluntary. Students were informed that their responses would be used only for academic research and statistical analysis. |
| Anonymity | The questionnaire did not ask participants to provide names, student ID numbers, phone numbers, identity card numbers, detailed addresses, or other direct identifiers. Any automatically generated platform metadata should be removed or anonymized before data sharing. |
| Questionnaire structure | The questionnaire consisted of five sections: basic information, career planning, learning engagement, internal mechanisms, and open-ended feedback. |
| Response format | Basic information questions used single-choice categorical responses. Core scale items used a seven-point Likert response format, where higher values indicate stronger agreement or a higher level of the corresponding construct. |
| Final valid sample | After data cleaning, 2,100 valid questionnaires were retained for descriptive statistics, regression analysis, and mediation analysis. |

**4. Data Cleaning Procedure**

| **Cleaning step** | **Description** |
| --- | --- |
| Step 1: Initial screening | Raw responses were checked for response duration and response patterns. |
| Step 2: Low-quality response removal | Questionnaires completed in fewer than 45 seconds and showing completely identical answers across all 32 core scale items were removed. |
| Step 3: Duplicate response handling | Responses with identical basic information and identical scale answers were treated as duplicate entries; only the first valid questionnaire was retained. |
| Step 4: Analysis dataset construction | After screening and duplicate removal, the final analysis dataset contained 2,100 valid responses. |

**5. Questionnaire Instrument: English Version**

Opening statement shown to participants: This survey is conducted for academic research to understand the relationship between career planning and learning behavior among vocational undergraduate and applied undergraduate students. The questionnaire is anonymous, and all data will be used only for statistical analysis and academic research. Please answer based on your actual situation. Thank you for your support.

General instruction: Unless otherwise specified, each question requires one response only. For the scale items, please select the number that best describes your current situation. The response format is 1 = not at all true / completely inconsistent and 7 = very true / completely consistent.

**Section A. Basic Information**

| **Variable** | **Question** | **Response options/coding** |
| --- | --- | --- |
| gender | Gender | 1 = Male; 2 = Female |
| grade | Grade level | 1 = Year 1; 2 = Year 2; 3 = Year 3; 4 = Year 4 |
| major | Major category | 1 = Science and engineering; 2 = Economics, management, accounting, or law; 3 = Humanities and social sciences; 4 = Arts or sports; 5 = Agriculture, forestry, or medicine |
| type | Undergraduate type | 1 = Vocational undergraduate; 2 = Applied undergraduate |
| hometown | Place of origin/family location | 1 = Municipality/provincial capital; 2 = Prefecture-level or county-level city; 3 = Town; 4 = Rural area |
| father_edu | Father's education level | 1 = Junior high school or below; 2 = Senior high school/secondary vocational school; 3 = Junior college/bachelor degree; 4 = Graduate degree or above |
| mother_edu | Mother's education level | 1 = Junior high school or below; 2 = Senior high school/secondary vocational school; 3 = Junior college/bachelor degree; 4 = Graduate degree or above |
| rank | Approximate class ranking in the previous semester or academic year | 1 = Top 20%; 2 = 20%-40%; 3 = 40%-60%; 4 = 60%-80%; 5 = Bottom 20% |
| cadre | Student leadership experience | 1 = Yes; 2 = No |
| career_course | Participation in career planning courses, lectures, or activities | 1 = Completed a systematic career planning course; 2 = Attended lectures/activities but not a systematic course; 3 = Never participated |
| internship | Part-time work or internship experience | 1 = Part-time work experience; 2 = Internship experience; 3 = Both part-time work and internship experience; 4 = Neither |

**Section B. Career Planning**

| **Item** | **Dimension** | **Item wording** | **Response** |
| --- | --- | --- | --- |
| C1 | Career Exploration | I have actively collected career information related to my major, such as job requirements, development prospects, and salary levels. | Seven-point Likert scale: 1 = Not at all true / completely inconsistent; 7 = Very true / completely consistent |
| C2 | Career Exploration | I have gained an in-depth understanding of my target occupation through internships, part-time work, or conversations with senior students or professionals. | Seven-point Likert scale: 1 = Not at all true / completely inconsistent; 7 = Very true / completely consistent |
| C3 | Career Exploration | I clearly know the core skills and qualification certificates required in my preferred career field. | Seven-point Likert scale: 1 = Not at all true / completely inconsistent; 7 = Very true / completely consistent |
| C4 | Career Exploration | I often think about the fit between my interests, abilities, and future career. | Seven-point Likert scale: 1 = Not at all true / completely inconsistent; 7 = Very true / completely consistent |
| C5 | Career Goal Clarity | I have a relatively clear direction regarding the industry or position I want to enter after graduation. | Seven-point Likert scale: 1 = Not at all true / completely inconsistent; 7 = Very true / completely consistent |
| C6 | Career Goal Clarity | I have a clear career development vision, such as becoming a technical specialist, manager, or entrepreneur. | Seven-point Likert scale: 1 = Not at all true / completely inconsistent; 7 = Very true / completely consistent |
| C7 | Career Goal Clarity | The career goals I have set are consistent with my personal values and interests. | Seven-point Likert scale: 1 = Not at all true / completely inconsistent; 7 = Very true / completely consistent |
| C8 | Career Goal Clarity | I know the key tasks I need to complete during university in order to achieve my career goals. | Seven-point Likert scale: 1 = Not at all true / completely inconsistent; 7 = Very true / completely consistent |
| C9 | Career Planning Execution | I have developed specific learning or development plans to achieve my career goals, such as entering competitions, obtaining certificates, or preparing for postgraduate study. | Seven-point Likert scale: 1 = Not at all true / completely inconsistent; 7 = Very true / completely consistent |
| C10 | Career Planning Execution | I adjust my learning plans and priorities in a timely manner when my career goals change. | Seven-point Likert scale: 1 = Not at all true / completely inconsistent; 7 = Very true / completely consistent |
| C11 | Career Planning Execution | My current course selection, certification preparation, internship, and related activities are arranged around my career goals. | Seven-point Likert scale: 1 = Not at all true / completely inconsistent; 7 = Very true / completely consistent |
| C12 | Career Planning Execution | I believe that what I am learning can help me achieve my future career goals. | Seven-point Likert scale: 1 = Not at all true / completely inconsistent; 7 = Very true / completely consistent |

**Section C. Learning Engagement**

| **Item** | **Dimension** | **Item wording** | **Response** |
| --- | --- | --- | --- |
| S1 | Cognitive Engagement | I connect what I learn in class with my prior experience or real-world problems. | Seven-point Likert scale: 1 = Not at all true / completely inconsistent; 7 = Very true / completely consistent |
| S2 | Cognitive Engagement | When reading textbooks or academic materials, I try to critically examine the ideas presented. | Seven-point Likert scale: 1 = Not at all true / completely inconsistent; 7 = Very true / completely consistent |
| S3 | Cognitive Engagement | I spend time deeply exploring professional issues that interest me, rather than merely preparing for examinations. | Seven-point Likert scale: 1 = Not at all true / completely inconsistent; 7 = Very true / completely consistent |
| S4 | Cognitive Engagement | I often reflect on my learning methods and try to find ways to improve them. | Seven-point Likert scale: 1 = Not at all true / completely inconsistent; 7 = Very true / completely consistent |
| S5 | Behavioral Engagement | I complete assignments or course projects assigned by teachers carefully and on time. | Seven-point Likert scale: 1 = Not at all true / completely inconsistent; 7 = Very true / completely consistent |
| S6 | Behavioral Engagement | In addition to attending classes, I spend considerable time each week on self-directed learning, such as reviewing, reading, and practicing. | Seven-point Likert scale: 1 = Not at all true / completely inconsistent; 7 = Very true / completely consistent |
| S7 | Behavioral Engagement | Even when course content is boring or difficult, I persist in learning it. | Seven-point Likert scale: 1 = Not at all true / completely inconsistent; 7 = Very true / completely consistent |
| S8 | Behavioral Engagement | I actively participate in classroom discussions and ask teachers questions. | Seven-point Likert scale: 1 = Not at all true / completely inconsistent; 7 = Very true / completely consistent |
| S9 | Practical Engagement | In my spare time, I actively go to laboratories, training rooms, or studios to practice operational skills. | Seven-point Likert scale: 1 = Not at all true / completely inconsistent; 7 = Very true / completely consistent |
| S10 | Practical Engagement | I actively prepare for and obtain professional qualification certificates or skill-level certificates related to my major. | Seven-point Likert scale: 1 = Not at all true / completely inconsistent; 7 = Very true / completely consistent |
| S11 | Practical Engagement | I pay attention to and try to participate in professional skills competitions, innovation and entrepreneurship competitions, or research projects. | Seven-point Likert scale: 1 = Not at all true / completely inconsistent; 7 = Very true / completely consistent |
| S12 | Practical Engagement | I actively seek opportunities to participate in social practice, enterprise internships, or part-time work related to my major. | Seven-point Likert scale: 1 = Not at all true / completely inconsistent; 7 = Very true / completely consistent |

**Section D. Professional Identity and Academic Self-Efficacy**

| **Item** | **Dimension** | **Item wording** | **Response** |
| --- | --- | --- | --- |
| I1 | Professional Identity | I am enthusiastic about my current major. | Seven-point Likert scale: 1 = Not at all true / completely inconsistent; 7 = Very true / completely consistent |
| I2 | Professional Identity | I am willing to recommend my major to others, such as junior students, friends, or relatives. | Seven-point Likert scale: 1 = Not at all true / completely inconsistent; 7 = Very true / completely consistent |
| I3 | Professional Identity | When my major is mentioned, I feel a sense of belonging and pride. | Seven-point Likert scale: 1 = Not at all true / completely inconsistent; 7 = Very true / completely consistent |
| I4 | Professional Identity | I recognize the social value and contribution of my major. | Seven-point Likert scale: 1 = Not at all true / completely inconsistent; 7 = Very true / completely consistent |
| I5 | Academic Self-Efficacy | I am confident that I can master the professional knowledge and skills taught in class. | Seven-point Likert scale: 1 = Not at all true / completely inconsistent; 7 = Very true / completely consistent |
| I6 | Academic Self-Efficacy | I believe that I can understand the most complex content in my major. | Seven-point Likert scale: 1 = Not at all true / completely inconsistent; 7 = Very true / completely consistent |
| I7 | Academic Self-Efficacy | When faced with difficult learning tasks, I firmly believe that I can complete them. | Seven-point Likert scale: 1 = Not at all true / completely inconsistent; 7 = Very true / completely consistent |
| I8 | Academic Self-Efficacy | Compared with other students, I think I am more capable of learning professional courses. | Seven-point Likert scale: 1 = Not at all true / completely inconsistent; 7 = Very true / completely consistent |

**Section E. Optional Open-Ended Feedback**

| **Variable** | **Section** | **Question wording** | **Response format** |
| --- | --- | --- | --- |
| open_text | Open-ended feedback | In your view, how do the current curriculum design, teaching methods, or practical components of your program help you achieve your career planning? What specific strengths or shortcomings exist, and how could they be improved? | Optional free-text response |
