# Supplementary material
Source: Research Square preprint supplement (doi:10.21203/rs.3.rs-9812393/v1)
Supplement: Supplementary file 4 [file 2a6a39e9e1e236ef3abeed44.xlsx]

## Sheet: Descriptive Statistics
vars	n	mean	sd	median	trimmed	mad	min	max	range	skew	kurtosis	se
1	2100	4.79976	1.41097	4.66667	4.82991	1.11195	1	7	6	-0.0355014	-0.418735	0.03079
2	2100	4.8425	1.46566	4.75	4.89807	1.11195	1	7	6	-0.158309	-0.419314	0.0319833
3	2100	4.75238	1.5081	4.5	4.80506	1.4826	1	7	6	-0.113957	-0.466755	0.0329093
4	2100	4.8044	1.47305	4.75	4.85223	1.11195	1	7	6	-0.116536	-0.38636	0.0321447
5	2100	4.80813	1.38903	4.58333	4.82783	1.11195	1	7	6	0.033175	-0.425609	0.030311
6	2100	4.80952	1.45052	4.75	4.84985	1.11195	1	7	6	-0.0720044	-0.423884	0.0316529
7	2100	4.8869	1.40655	4.75	4.9244	1.11195	1	7	6	-0.0650113	-0.440858	0.0306935
8	2100	4.72798	1.48541	4.5	4.76414	1.11195	1	7	6	-0.0273874	-0.513554	0.0324142
9	2100	4.90845	1.46921	5	4.97173	1.4826	1	7	6	-0.160542	-0.517103	0.0320607
10	2100	4.89321	1.44586	5	4.94881	1.4826	1	7	6	-0.152199	-0.413337	0.0315513

## Sheet: Correlation Matrix
career_plan	career_explore	career_clarity	career_action	learn_engage	cognitive_eng	behavior_eng	practical_eng	prof_identity	acad_efficacy
1	0.94	0.96	0.955	0.913	0.896	0.875	0.857	0.822	0.843
0.94	1	0.849	0.837	0.836	0.816	0.798	0.792	0.749	0.77
0.96	0.849	1	0.891	0.861	0.851	0.819	0.808	0.78	0.8
0.955	0.837	0.891	1	0.91	0.892	0.881	0.847	0.818	0.837
0.913	0.836	0.861	0.91	1	0.958	0.965	0.956	0.883	0.908
0.896	0.816	0.851	0.892	0.958	1	0.896	0.862	0.837	0.865
0.875	0.798	0.819	0.881	0.965	0.896	1	0.887	0.861	0.882
0.857	0.792	0.808	0.847	0.956	0.862	0.887	1	0.843	0.867
0.822	0.749	0.78	0.818	0.883	0.837	0.861	0.843	1	0.894
0.843	0.77	0.8	0.837	0.908	0.865	0.882	0.867	0.894	1

## Sheet: Regression Results
model	term	estimate	std_error	t_value	p_value
M1_基准模型_学习参与	(Intercept)	0.637713	0.0998139	6.38902	2.0562e-10
M1_基准模型_学习参与	career_plan	0.896496	0.011596	77.311	0
M1_基准模型_学习参与	gender2	-0.0571109	0.0300564	-1.90012	0.057556
M1_基准模型_学习参与	grade2	0.0418189	0.0324899	1.28714	0.198191
M1_基准模型_学习参与	grade3	-0.0210115	0.0306236	-0.686121	0.492713
M1_基准模型_学习参与	grade4	0.0676323	0.0589871	1.14656	0.251696
M1_基准模型_学习参与	major2	0.0431535	0.0381432	1.13135	0.258037
M1_基准模型_学习参与	major3	0.0331191	0.0411292	0.805245	0.420771
M1_基准模型_学习参与	major4	-0.587737	0.612215	-0.960018	0.337158
M1_基准模型_学习参与	major5	0.050083	0.0449691	1.11372	0.265528
M1_基准模型_学习参与	type2	-0.00266684	0.0318301	-0.0837834	0.933237
M1_基准模型_学习参与	hometown2	-0.173815	0.0605122	-2.87239	0.00411524
M1_基准模型_学习参与	hometown3	-0.113194	0.0619226	-1.82799	0.0676944
M1_基准模型_学习参与	hometown4	-0.107949	0.0587775	-1.83657	0.0664167
M1_基准模型_学习参与	father_edu2	0.054539	0.036973	1.4751	0.140337
M1_基准模型_学习参与	father_edu3	0.0235686	0.0459326	0.513112	0.607927
M1_基准模型_学习参与	father_edu4	-0.102388	0.160655	-0.637318	0.523989
M1_基准模型_学习参与	mother_edu2	0.00257701	0.0376731	0.0684045	0.94547
M1_基准模型_学习参与	mother_edu3	0.0838231	0.0508689	1.64782	0.0995404
M1_基准模型_学习参与	mother_edu4	0.131666	0.185552	0.709593	0.478036
M1_基准模型_学习参与	rank2	-0.0033262	0.0361228	-0.0920803	0.926643
M1_基准模型_学习参与	rank3	-0.0444943	0.035325	-1.25957	0.207966
M1_基准模型_学习参与	rank4	-0.0673094	0.0417349	-1.61278	0.106944
M1_基准模型_学习参与	rank5	-0.133455	0.0572028	-2.33302	0.0197423
M1_基准模型_学习参与	cadre2	-0.00980336	0.0302507	-0.32407	0.745918
M1_基准模型_学习参与	career_course2	-0.0132662	0.0278092	-0.477043	0.633382
M1_基准模型_学习参与	career_course3	0.0343996	0.0445454	0.772237	0.440062
M1_基准模型_学习参与	internship2	-0.0696239	0.0451105	-1.54341	0.122885
M1_基准模型_学习参与	internship3	-0.0254677	0.0401367	-0.634523	0.52581
M1_基准模型_学习参与	internship4	0.0282219	0.0320163	0.881487	0.378157
M2_认知投入	(Intercept)	0.475499	0.0997585	4.7665	2.00495e-06
M2_认知投入	career_plan	0.925871	0.011554	80.134	0
M2_认知投入	gender2	-0.0626072	0.0322072	-1.94389	0.052044
M2_认知投入	grade2	0.00894553	0.037301	0.23982	0.810493
M2_认知投入	grade3	-0.0441568	0.0357951	-1.2336	0.217493
M2_认知投入	grade4	0.0554189	0.0684733	0.80935	0.418407
M2_认知投入	major2	0.0208622	0.0426771	0.488839	0.625008
M2_认知投入	major3	0.0502366	0.0450494	1.11514	0.264918
M2_认知投入	major4	-0.9927	1.25965	-0.788073	0.430744
M2_认知投入	major5	0.0463475	0.0484818	0.955978	0.339195
M2_认知投入	type2	0.0331798	0.0346845	0.956618	0.338872
M2_认知投入	hometown2	-0.183816	0.0660122	-2.78458	0.00540842
M2_认知投入	hometown3	-0.122738	0.0687041	-1.78648	0.0741677
M2_认知投入	hometown4	-0.126304	0.0641315	-1.96945	0.0490346
M2_认知投入	father_edu2	0.0409271	0.041318	0.990539	0.322027
M2_认知投入	father_edu3	0.00314384	0.0511001	0.0615232	0.950948
M2_认知投入	father_edu4	-0.0272946	0.268378	-0.101702	0.919003
M2_认知投入	mother_edu2	0.0265127	0.0425655	0.622868	0.53344
M2_认知投入	mother_edu3	0.0838832	0.0571578	1.46757	0.142372
M2_认知投入	mother_edu4	-0.00998145	0.26111	-0.038227	0.96951
M2_认知投入	rank2	-0.00327872	0.0426929	-0.0767979	0.938792
M2_认知投入	rank3	-0.0353167	0.0390317	-0.904821	0.365666
M2_认知投入	rank4	-0.0383358	0.0517639	-0.740591	0.459025
M2_认知投入	rank5	-0.0861436	0.060436	-1.42537	0.154201
M2_认知投入	cadre2	0.0214273	0.0331317	0.646732	0.517877
M2_认知投入	career_course2	-0.00345439	0.0310727	-0.111171	0.911491
M2_认知投入	career_course3	0.111608	0.0509167	2.19197	0.0284928
M2_认知投入	internship2	-0.0698777	0.0492469	-1.41893	0.156071
M2_认知投入	internship3	-0.0342043	0.0416756	-0.820726	0.411897
M2_认知投入	internship4	0.0214571	0.0395856	0.542042	0.587848
M3_行为投入	(Intercept)	0.741937	0.116544	6.36616	2.38013e-10
M3_行为投入	career_plan	0.86802	0.0135863	63.8895	0
M3_行为投入	gender2	-0.0372704	0.0359395	-1.03703	0.299843
M3_行为投入	grade2	0.0807062	0.0408275	1.97676	0.0482014
M3_行为投入	grade3	0.0447056	0.0366011	1.22143	0.222063
M3_行为投入	grade4	0.0889412	0.0736438	1.20772	0.227292
M3_行为投入	major2	0.0683294	0.0459357	1.4875	0.137035
M3_行为投入	major3	0.0677906	0.0500071	1.35562	0.175368
M3_行为投入	major4	0.52016	0.572731	0.908208	0.363874
M3_行为投入	major5	0.0836004	0.0555715	1.50438	0.132637
M3_行为投入	type2	0.00737924	0.0391383	0.188543	0.85047
M3_行为投入	hometown2	-0.110439	0.0699048	-1.57985	0.114293
M3_行为投入	hometown3	-0.0388186	0.0732404	-0.530016	0.596157
M3_行为投入	hometown4	-0.0399393	0.0693277	-0.576095	0.564614
M3_行为投入	father_edu2	0.0445443	0.0436543	1.02039	0.307664
M3_行为投入	father_edu3	0.0127881	0.0559805	0.228438	0.819328
M3_行为投入	father_edu4	-0.048662	0.18552	-0.2623	0.793116
M3_行为投入	mother_edu2	-0.0132741	0.0455141	-0.291647	0.770585
M3_行为投入	mother_edu3	0.101725	0.0591294	1.72038	0.0855132
M3_行为投入	mother_edu4	0.129525	0.198941	0.651074	0.515071
M3_行为投入	rank2	-0.0527139	0.0437264	-1.20554	0.228133
M3_行为投入	rank3	-0.0581277	0.0433227	-1.34174	0.179829
M3_行为投入	rank4	-0.137214	0.0487713	-2.81342	0.00494804
M3_行为投入	rank5	-0.164089	0.0658549	-2.49167	0.0127921
M3_行为投入	cadre2	0.0231386	0.0353894	0.653828	0.513295
M3_行为投入	career_course2	-0.0674007	0.0338107	-1.99347	0.0463408
M3_行为投入	career_course3	-0.027567	0.0531789	-0.518383	0.604247
M3_行为投入	internship2	-0.101486	0.0513597	-1.97599	0.0482884
M3_行为投入	internship3	-0.00393155	0.0506483	-0.0776245	0.938134
M3_行为投入	internship4	0.106719	0.0389174	2.7422	0.00615548
M4_实践投入	(Intercept)	0.695702	0.137003	5.078	4.15585e-07
M4_实践投入	career_plan	0.895597	0.0163568	54.7539	0
M4_实践投入	gender2	-0.071455	0.0429312	-1.66441	0.0961825
M4_实践投入	grade2	0.0358051	0.0417692	0.857212	0.391427
M4_实践投入	grade3	-0.0635834	0.0434649	-1.46287	0.143656
M4_实践投入	grade4	0.0585368	0.0830124	0.705157	0.480792
M4_实践投入	major2	0.0402687	0.0506561	0.794943	0.426738
M4_实践投入	major3	-0.0186698	0.0559326	-0.333791	0.738571
M4_实践投入	major4	-1.29067	1.08909	-1.1851	0.236116
M4_实践投入	major5	0.0203011	0.0599627	0.338562	0.734974
M4_实践投入	type2	-0.0485596	0.0427636	-1.13554	0.256282
M4_实践投入	hometown2	-0.227189	0.0741267	-3.06487	0.00220579
M4_实践投入	hometown3	-0.178025	0.0770575	-2.31029	0.0209699
M4_实践投入	hometown4	-0.157604	0.0732942	-2.15029	0.0316477
M4_实践投入	father_edu2	0.0781457	0.0495583	1.57684	0.114984
M4_实践投入	father_edu3	0.0547738	0.0592698	0.924144	0.355519
M4_实践投入	father_edu4	-0.231209	0.166769	-1.3864	0.165774
M4_实践投入	mother_edu2	-0.00550758	0.0477739	-0.115284	0.908231
M4_实践投入	mother_edu3	0.0658612	0.0667967	0.985995	0.324251
M4_实践投入	mother_edu4	0.275455	0.2207	1.2481	0.212136
M4_实践投入	rank2	0.046014	0.0468265	0.982649	0.325895
M4_实践投入	rank3	-0.0400386	0.047377	-0.845106	0.398149
M4_实践投入	rank4	-0.026378	0.0561032	-0.47017	0.638283
M4_实践投入	rank5	-0.150134	0.0782446	-1.91878	0.0551499
M4_实践投入	cadre2	-0.073976	0.0380258	-1.94542	0.0518598
M4_实践投入	career_course2	0.0310565	0.0365802	0.848998	0.395981
M4_实践投入	career_course3	0.019158	0.0594114	0.322464	0.747134
M4_实践投入	internship2	-0.0375078	0.0685796	-0.546924	0.58449
M4_实践投入	internship3	-0.0382672	0.0532717	-0.718339	0.472629
M4_实践投入	internship4	-0.0435105	0.0453288	-0.959887	0.337224
M5_职业规划三维	(Intercept)	0.633998	0.0949355	6.67819	3.09878e-11
M5_职业规划三维	career_explore	0.188217	0.0287876	6.53811	7.82588e-11
M5_职业规划三维	career_clarity	0.127583	0.0370593	3.44267	0.000587467
M5_职业规划三维	career_action	0.583231	0.0398764	14.626	3.57264e-46
M5_职业规划三维	gender2	-0.0667997	0.0290262	-2.30136	0.0214702
M5_职业规划三维	grade2	0.0395492	0.0311086	1.27133	0.203756
M5_职业规划三维	grade3	-0.0522393	0.0289244	-1.80606	0.0710541
M5_职业规划三维	grade4	0.0506862	0.0614912	0.824284	0.409873
M5_职业规划三维	major2	0.0267136	0.0346652	0.770615	0.441023
M5_职业规划三维	major3	0.0383072	0.0380404	1.00702	0.314045
M5_职业规划三维	major4	-0.788891	0.89927	-0.877257	0.380449
M5_职业规划三维	major5	0.0483472	0.0423637	1.14124	0.253901
M5_职业规划三维	type2	0.00136014	0.030744	0.0442407	0.964717
M5_职业规划三维	hometown2	-0.155944	0.0599718	-2.60028	0.00938106
M5_职业规划三维	hometown3	-0.102036	0.0626702	-1.62814	0.103648
M5_职业规划三维	hometown4	-0.101217	0.0586929	-1.72451	0.0847648
M5_职业规划三维	father_edu2	0.0613823	0.0351581	1.74589	0.0809784
M5_职业规划三维	father_edu3	0.0179668	0.0443511	0.405104	0.685443
M5_职业规划三维	father_edu4	-0.0777949	0.18218	-0.427022	0.669408
M5_职业规划三维	mother_edu2	-0.0162353	0.0344744	-0.47094	0.637733
M5_职业规划三维	mother_edu3	0.0818618	0.0489844	1.67118	0.0948372
M5_职业规划三维	mother_edu4	0.064842	0.181264	0.357722	0.720588
M5_职业规划三维	rank2	0.0112638	0.0341731	0.329611	0.741727
M5_职业规划三维	rank3	-0.0410891	0.0333335	-1.23267	0.21784
M5_职业规划三维	rank4	-0.0421087	0.0397974	-1.05808	0.290145
M5_职业规划三维	rank5	-0.0864944	0.0541751	-1.59657	0.110514
M5_职业规划三维	cadre2	-0.0200555	0.0285158	-0.703314	0.481939
M5_职业规划三维	career_course2	-0.00505154	0.0265708	-0.190116	0.849237
M5_职业规划三维	career_course3	0.0253608	0.0427832	0.592774	0.553397
M5_职业规划三维	internship2	-0.0691816	0.0447694	-1.54529	0.12243
M5_职业规划三维	internship3	-0.0274188	0.0391962	-0.699527	0.484301
M5_职业规划三维	internship4	-0.00582681	0.030694	-0.189836	0.849457
M6_职业规划_专业认同	(Intercept)	0.941365	0.131923	7.13574	1.32595e-12
M6_职业规划_专业认同	career_plan	0.855336	0.0151969	56.2837	0
M6_职业规划_专业认同	gender2	-0.0568176	0.0428833	-1.32494	0.185339
M6_职业规划_专业认同	grade2	-0.00316322	0.0498771	-0.0634203	0.949438
M6_职业规划_专业认同	grade3	-0.151189	0.0467433	-3.23446	0.00123791
M6_职业规划_专业认同	grade4	-0.0629341	0.0913967	-0.688582	0.491164
M6_职业规划_专业认同	major2	0.0280473	0.0605659	0.463087	0.643351
M6_职业规划_专业认同	major3	0.0588119	0.0620421	0.947936	0.343273
M6_职业规划_专业认同	major4	0.361897	0.691715	0.523188	0.600899
M6_职业规划_专业认同	major5	0.0785097	0.0648758	1.21015	0.226358
M6_职业规划_专业认同	type2	-0.0371933	0.0433943	-0.857101	0.391488
M6_职业规划_专业认同	hometown2	-0.103898	0.0769094	-1.35092	0.17687
M6_职业规划_专业认同	hometown3	-0.105274	0.0841692	-1.25074	0.211172
M6_职业规划_专业认同	hometown4	-0.0234096	0.0769738	-0.304125	0.761063
M6_职业规划_专业认同	father_edu2	-0.0298686	0.0547232	-0.545812	0.585254
M6_职业规划_专业认同	father_edu3	-0.0673225	0.0662037	-1.0169	0.30932
M6_职业规划_专业认同	father_edu4	0.257247	0.317486	0.810263	0.417882
M6_职业规划_专业认同	mother_edu2	0.0442687	0.0537813	0.823123	0.410533
M6_职业规划_专业认同	mother_edu3	0.144856	0.076935	1.88284	0.0598624
M6_职业规划_专业认同	mother_edu4	-0.170521	0.29758	-0.573025	0.56669
M6_职业规划_专业认同	rank2	0.068186	0.0519102	1.31354	0.189148
M6_职业规划_专业认同	rank3	0.019337	0.0534199	0.361982	0.717402
M6_职业规划_专业认同	rank4	-0.0717926	0.0607772	-1.18124	0.237642
M6_职业规划_专业认同	rank5	-0.12585	0.0748306	-1.6818	0.0927589
M6_职业规划_专业认同	cadre2	-0.0505451	0.0403692	-1.25207	0.210686
M6_职业规划_专业认同	career_course2	-0.0192173	0.041437	-0.463771	0.64286
M6_职业规划_专业认同	career_course3	-0.0577289	0.0651551	-0.886022	0.375709
M6_职业规划_专业认同	internship2	-0.0866612	0.072326	-1.1982	0.230975
M6_职业规划_专业认同	internship3	-0.00872756	0.0557296	-0.156606	0.875571
M6_职业规划_专业认同	internship4	0.0773282	0.0494532	1.56366	0.118049
M7_职业规划_学习自我效能感	(Intercept)	0.856303	0.135177	6.33469	2.90904e-10
M7_职业规划_学习自我效能感	career_plan	0.857231	0.0156726	54.6963	0
M7_职业规划_学习自我效能感	gender2	-0.0955979	0.0421622	-2.26739	0.0234693
M7_职业规划_学习自我效能感	grade2	0.00767993	0.0443263	0.173259	0.862465
M7_职业规划_学习自我效能感	grade3	-0.0417898	0.0417091	-1.00194	0.316491
M7_职业规划_学习自我效能感	grade4	-0.0190763	0.0880597	-0.21663	0.828518
M7_职业规划_学习自我效能感	major2	0.0634571	0.0550138	1.15348	0.248848
M7_职业规划_学习自我效能感	major3	0.134325	0.057509	2.33572	0.0196008
M7_职业规划_学习自我效能感	major4	-0.626196	1.30569	-0.479591	0.631569
M7_职业规划_学习自我效能感	major5	0.0922287	0.0629914	1.46415	0.143306
M7_职业规划_学习自我效能感	type2	-0.0172393	0.0406808	-0.423771	0.671777
M7_职业规划_学习自我效能感	hometown2	-0.07166	0.080307	-0.892325	0.372322
M7_职业规划_学习自我效能感	hometown3	0.0418983	0.0839321	0.499193	0.617697
M7_职业规划_学习自我效能感	hometown4	0.0520438	0.0780063	0.667174	0.504735
M7_职业规划_学习自我效能感	father_edu2	0.00707211	0.0497637	0.142114	0.887004
M7_职业规划_学习自我效能感	father_edu3	0.0139716	0.064539	0.216483	0.828633
M7_职业规划_学习自我效能感	father_edu4	0.289406	0.266845	1.08455	0.278247
M7_职业规划_学习自我效能感	mother_edu2	0.0768874	0.0494285	1.55553	0.119973
M7_职业规划_学习自我效能感	mother_edu3	0.158351	0.0727454	2.17679	0.0296089
M7_职业规划_学习自我效能感	mother_edu4	-0.289484	0.270584	-1.06985	0.284812
M7_职业规划_学习自我效能感	rank2	-0.0376894	0.0494398	-0.76233	0.44595
M7_职业规划_学习自我效能感	rank3	-0.0997299	0.0504677	-1.97611	0.0482745
M7_职业规划_学习自我效能感	rank4	-0.157144	0.0591317	-2.65752	0.00793224
M7_职业规划_学习自我效能感	rank5	-0.222602	0.0718348	-3.0988	0.0019692
M7_职业规划_学习自我效能感	cadre2	-0.0405022	0.0395155	-1.02497	0.305498
M7_职业规划_学习自我效能感	career_course2	-0.0567651	0.038672	-1.46786	0.142294
M7_职业规划_学习自我效能感	career_course3	-0.028364	0.0606926	-0.467339	0.640307
M7_职业规划_学习自我效能感	internship2	-0.117902	0.0706491	-1.66884	0.0953007
M7_职业规划_学习自我效能感	internship3	-0.0657631	0.0498538	-1.31912	0.187275
M7_职业规划_学习自我效能感	internship4	0.0509147	0.0459945	1.10697	0.268434
M8_中介模型	(Intercept)	0.17949	0.0626034	2.8671	0.00418443
M8_中介模型	career_plan	0.454281	0.028648	15.8574	1.56627e-53
M8_中介模型	prof_identity	0.189595	0.0275538	6.88088	7.85585e-12
M8_中介模型	acad_efficacy	0.326689	0.0351706	9.28869	3.82661e-20
M8_中介模型	gender2	-0.0151078	0.0225459	-0.67009	0.502875
M8_中介模型	grade2	0.0399097	0.0249788	1.59774	0.110253
M8_中介模型	grade3	0.0213054	0.0224304	0.949847	0.342301
M8_中介模型	grade4	0.0857963	0.045858	1.87091	0.0614982
M8_中介模型	major2	0.0171051	0.0287374	0.595223	0.55176
M8_中介模型	major3	-0.0219137	0.0323568	-0.677254	0.49832
M8_中介模型	major4	-0.45178	0.342381	-1.31953	0.187139
M8_中介模型	major5	0.00506795	0.0333425	0.151997	0.879204
M8_中介模型	type2	0.0100167	0.0241752	0.414337	0.67867
M8_中介模型	hometown2	-0.130706	0.0402624	-3.24635	0.00118764
M8_中介模型	hometown3	-0.106922	0.0438427	-2.43878	0.0148207
M8_中介模型	hometown4	-0.120513	0.0404104	-2.98222	0.00289509
M8_中介模型	father_edu2	0.0578916	0.0263854	2.19408	0.0283407
M8_中介模型	father_edu3	0.0317682	0.0385401	0.824289	0.40987
M8_中介模型	father_edu4	-0.245707	0.08813	-2.788	0.0053519
M8_中介模型	mother_edu2	-0.0309343	0.0263485	-1.17405	0.240512
M8_中介模型	mother_edu3	0.00462755	0.0419298	0.110364	0.912131
M8_中介模型	mother_edu4	0.258567	0.11186	2.31153	0.0209014
M8_中介模型	rank2	-0.00394118	0.0267202	-0.147498	0.882753
M8_中介模型	rank3	-0.0155799	0.0261646	-0.595458	0.551602
M8_中介模型	rank4	-0.00236078	0.0315798	-0.0747559	0.940416
M8_中介模型	rank5	-0.0368736	0.0452794	-0.814358	0.415534
M8_中介模型	cadre2	0.0130113	0.0227491	0.571949	0.567419
M8_中介模型	career_course2	0.00892182	0.0214208	0.416503	0.677085
M8_中介模型	career_course3	0.0546109	0.0309202	1.76619	0.0775121
M8_中介模型	internship2	-0.0146763	0.0324011	-0.452956	0.650628
M8_中介模型	internship3	-0.0023289	0.0313742	-0.0742297	0.940835
M8_中介模型	internship4	-0.00307233	0.0241805	-0.127058	0.898907
M9_交互项模型	(Intercept)	0.602544	0.100381	6.0026	2.28702e-09
M9_交互项模型	career_plan	0.904059	0.0133228	67.858	0
M9_交互项模型	type2	0.103137	0.133209	0.774248	0.438873
M9_交互项模型	gender2	-0.0582609	0.0299549	-1.94496	0.0519154
M9_交互项模型	grade2	0.0421236	0.0324714	1.29725	0.194689
M9_交互项模型	grade3	-0.0194332	0.0302386	-0.642664	0.520513
M9_交互项模型	grade4	0.0687904	0.0589624	1.16668	0.243473
M9_交互项模型	major2	0.0427677	0.0380745	1.12326	0.261456
M9_交互项模型	major3	0.0318005	0.0411511	0.772775	0.439744
M9_交互项模型	major4	-0.575986	0.620008	-0.928998	0.352999
M9_交互项模型	major5	0.0483868	0.044894	1.0778	0.281248
M9_交互项模型	hometown2	-0.17469	0.0607378	-2.87613	0.00406701
M9_交互项模型	hometown3	-0.113243	0.0619548	-1.82784	0.0677175
M9_交互项模型	hometown4	-0.108153	0.0588178	-1.83877	0.0660919
M9_交互项模型	father_edu2	0.0555943	0.0368952	1.50681	0.132011
M9_交互项模型	father_edu3	0.0228554	0.0459058	0.497875	0.618625
M9_交互项模型	father_edu4	-0.103083	0.159767	-0.64521	0.518862
M9_交互项模型	mother_edu2	0.00229888	0.0376685	0.0610292	0.951342
M9_交互项模型	mother_edu3	0.0836617	0.0508222	1.64616	0.0998817
M9_交互项模型	mother_edu4	0.137379	0.18524	0.741624	0.458399
M9_交互项模型	rank2	-0.00320241	0.0361378	-0.0886166	0.929395
M9_交互项模型	rank3	-0.0439288	0.0352863	-1.24493	0.2133
M9_交互项模型	rank4	-0.0676317	0.0417909	-1.61834	0.105743
M9_交互项模型	rank5	-0.132798	0.0572876	-2.31808	0.0205418
M9_交互项模型	cadre2	-0.0104992	0.0303313	-0.346151	0.729264
M9_交互项模型	career_course2	-0.012642	0.027802	-0.454716	0.649361
M9_交互项模型	career_course3	0.034455	0.044508	0.774132	0.438941
M9_交互项模型	internship2	-0.0707069	0.0451865	-1.56478	0.117788
M9_交互项模型	internship3	-0.0241987	0.0400236	-0.604611	0.545504
M9_交互项模型	internship4	0.0275621	0.0320865	0.858993	0.390444
M9_交互项模型	career_plan:type2	-0.0220307	0.024792	-0.88862	0.374311

## Sheet: Model Fit
model	R2	Adj_R2	N
M1_基准模型_学习参与	0.836532	0.834242	2100
M2_认知投入	0.807242	0.804542	2100
M3_行为投入	0.770205	0.766985	2100
M4_实践投入	0.742269	0.738658	2100
M5_职业规划三维	0.853267	0.851067	2100
M6_职业规划_专业认同	0.683629	0.679197	2100
M7_职业规划_学习自我效能感	0.71939	0.715459	2100
M8_中介模型	0.908364	0.90699	2100
M9_交互项模型	0.836644	0.834275	2100

## Sheet: Data with Mean Variables
id	gender	grade	major	type	hometown	father_edu	mother_edu	rank	cadre	career_course	internship	C1	C2	C3	C4	C5	C6	C7	C8	C9	C10	C11	C12	S1	S2	S3	S4	S5	S6	S7	S8	S9	S10	S11	S12	I1	I2	I3	I4	I5	I6	I7	I8	open_text	career_explore	career_clarity	career_action	career_plan	cognitive_eng
1	2	3	2	1	2	1	2	1	1	1	1	7	7	6	6	6	5	6	7	7	7	7	6	7	7	7	7	7	7	6	7	6	7	7	7	7	6	6	6	7	7	7	7	合理规划参与实践	6.5	6	6.75	6.41667	7
2	1	4	2	1	2	3	1	2	1	1	2	5	4	5	5	5	5	4	5	5	4	5	5	5	4	5	5	5	5	4	5	4	5	5	4	4	4	5	4	4	4	5	4	无	4.75	4.75	4.75	4.75	4.75
3	2	1	2	1	1	2	2	4	2	1	4	4	4	4	4	4	4	4	4	4	4	4	4	4	4	4	4	4	4	4	4	4	4	4	4	4	4	4	4	4	4	4	4	🈚️	4	4	4	4	4
4	2	1	2	1	2	1	1	1	1	1	1	7	7	7	7	7	7	7	7	7	7	7	7	7	7	7	7	7	7	7	7	7	7	7	7	7	7	7	7	7	7	7	7	无	7	7	7	7	7
5	2	4	2	1	2	2	2	2	2	3	2	7	6	7	6	6	6	7	6	7	6	7	7	7	6	7	6	7	7	7	6	7	7	7	7	7	6	7	6	7	6	7	6	无	6.5	6.25	6.75	6.5	6.5
6	2	1	2	1	4	1	1	1	2	1	1	3	3	3	3	2	2	2	2	3	3	3	3	3	3	3	3	3	3	3	3	3	3	3	3	3	3	3	3	3	3	3	3	无	3	2	3	2.66667	3
7	2	1	2	1	4	2	2	4	2	2	2	7	6	4	4	4	5	3	5	5	3	6	6	5	3	3	2	5	3	3	6	5	5	5	5	5	3	4	5	5	5	4	4	无	5.25	4.25	5	4.83333	3.25
8	2	4	2	1	4	2	2	1	2	1	3	6	5	5	5	5	5	5	5	4	4	4	4	5	4	5	4	6	5	5	5	4	4	4	4	5	4	4	5	4	4	4	4	暂无	5.25	5	4	4.75	4.5
9	2	4	2	1	4	1	2	2	2	1	3	6	6	7	6	6	5	5	6	7	6	6	6	6	6	6	5	6	6	6	4	5	6	7	6	6	6	6	6	5	5	5	5	无	6.25	5.5	6.25	6	5.75
10	1	4	2	1	4	2	2	2	2	1	3	7	7	4	4	4	4	4	4	4	3	3	4	6	4	6	6	7	7	7	7	4	4	4	4	7	7	7	7	6	5	5	4	无	5.5	4	3.5	4.33333	5.5
11	2	4	2	1	4	2	1	2	1	2	1	5	3	4	4	4	3	4	4	5	5	6	4	5	4	5	4	6	5	5	4	4	6	6	5	4	5	5	5	5	5	6	5	无	4	3.75	5	4.25	4.5
12	2	1	2	1	4	2	1	2	1	1	1	4	2	4	4	2	2	3	3	5	4	3	3	4	4	4	4	5	4	5	4	3	5	4	5	4	5	4	5	4	5	4	3	无	3.5	2.5	3.75	3.25	4
13	2	4	2	1	3	1	1	1	2	3	3	5	5	6	5	6	5	6	5	5	5	6	5	4	5	5	5	6	4	5	5	5	5	6	5	4	6	5	5	6	5	5	6	增加实践	5.25	5.5	5.25	5.33333	4.75
14	2	4	2	1	1	3	3	1	2	1	2	6	4	6	6	7	7	7	7	7	7	7	6	7	7	7	7	7	7	7	7	7	7	7	7	6	6	7	6	6	5	6	6	没有不足	5.5	7	6.75	6.41667	7
15	2	1	2	1	4	1	1	1	1	1	1	7	7	7	7	7	7	7	7	7	7	7	7	7	7	7	7	7	7	7	7	7	7	7	7	7	7	7	7	7	7	7	7	无	7	7	7	7	7
16	2	1	2	1	4	2	1	3	2	1	4	1	1	1	3	1	1	1	1	1	1	1	1	5	5	5	5	5	5	5	5	5	5	5	5	6	6	6	6	6	6	6	6	无	1.5	1	1	1.16667	5
17	2	1	2	1	4	1	1	5	2	1	1	2	4	6	5	6	3	4	5	5	5	4	5	5	4	4	4	4	4	5	4	3	4	2	3	3	2	3	3	4	4	4	4	无	4.25	4.5	4.75	4.5	4.25
18	2	1	2	1	4	2	2	1	2	1	1	4	5	7	6	6	5	5	5	5	5	4	6	5	5	5	5	5	5	5	5	5	5	5	5	5	5	5	6	5	5	5	5	无	5.5	5.25	5	5.25	5
19	1	2	2	1	2	3	3	3	2	2	1	5	5	5	5	5	5	5	5	5	5	5	5	5	5	5	5	5	5	5	5	5	5	5	5	5	5	5	5	5	5	5	5	🈚	5	5	5	5	5
20	1	2	5	1	2	2	2	1	1	1	3	5	6	6	6	6	6	6	6	6	6	6	6	6	6	6	6	6	6	6	6	6	6	6	6	6	6	6	6	6	6	6	6	无	5.75	6	6	5.91667	6
21	2	4	2	1	4	2	1	5	2	1	3	4	4	4	4	4	4	4	4	4	4	4	4	4	4	4	4	4	4	4	4	4	4	4	4	4	4	4	4	4	4	4	4	无	4	4	4	4	4
22	2	4	2	1	4	1	1	3	2	1	2	4	4	5	4	6	5	5	5	3	4	3	4	4	4	4	4	4	4	4	4	4	4	4	4	6	4	4	4	4	5	4	4	无	4.25	5.25	3.5	4.33333	4
23	1	1	1	1	3	1	1	1	1	1	1	1	1	1	1	1	1	1	1	1	1	1	1	1	1	1	1	1	1	1	1	1	1	1	1	1	1	1	1	1	1	1	1	无	1	1	1	1	1
24	2	2	2	1	4	1	1	1	2	1	4	5	5	5	5	5	5	5	5	5	5	5	5	5	5	5	5	5	5	5	5	5	5	5	5	5	5	5	5	5	5	5	5	无	5	5	5	5	5
25	2	4	2	1	4	1	1	2	2	2	3	4	4	4	4	4	4	4	4	4	4	4	4	4	4	4	4	4	4	4	4	4	4	4	4	4	4	4	4	4	4	4	4	无	4	4	4	4	4
26	2	4	2	1	4	1	1	3	2	1	3	4	4	5	5	3	3	3	3	5	5	4	4	4	4	4	4	5	4	4	4	4	5	4	5	3	3	3	4	4	4	4	4	希望可以多提供一下实践机会来增加就业经验	4.5	3	4.5	4	4
27	2	2	2	1	4	1	1	2	2	2	3	5	5	5	5	5	5	5	5	5	5	5	5	5	5	5	5	5	5	5	5	5	5	5	5	5	5	5	5	5	5	5	5	实践课多点	5	5	5	5	5
28	2	4	2	1	4	2	2	4	2	2	3	4	4	4	4	4	4	4	4	4	4	4	4	4	4	4	4	4	4	4	4	4	4	4	4	4	4	4	4	4	4	4	4	无	4	4	4	4	4
29	1	4	2	1	2	1	1	4	2	3	2	6	6	6	6	6	6	6	6	6	6	6	6	6	6	6	6	6	6	6	6	6	6	6	6	6	6	6	6	6	6	6	6	无	6	6	6	6	6
30	2	4	2	1	1	2	2	5	1	1	3	5	5	5	5	2	2	3	2	4	4	4	4	4	4	4	4	4	4	4	4	4	4	4	4	4	4	4	4	4	4	4	4	没有	5	2.25	4	3.75	4
31	2	2	3	2	4	2	1	1	1	1	1	4	3	7	7	7	7	7	7	6	6	6	6	6	6	6	6	6	6	6	6	6	6	6	6	6	6	6	6	6	6	6	6	嗯	5.25	7	6	6.08333	6
32	2	4	2	1	4	1	1	2	2	2	3	6	6	4	5	4	4	4	5	5	5	4	4	5	4	5	5	6	5	5	4	4	5	4	5	5	4	4	5	4	5	3	5	无	5.25	4.25	4.5	4.66667	4.75
33	2	2	5	1	2	2	2	1	1	2	1	4	4	4	4	4	4	4	4	4	4	4	4	4	4	4	4	4	4	4	4	4	4	4	4	4	4	4	4	4	4	4	4	无	4	4	4	4	4
34	1	2	5	1	4	3	1	1	1	2	1	7	7	7	7	7	7	7	7	7	7	7	7	7	7	7	7	7	7	7	7	7	7	7	7	7	7	7	7	7	7	7	7	无	7	7	7	7	7
35	1	2	2	2	4	1	1	2	2	2	3	7	6	5	6	6	6	6	6	6	6	6	5	3	6	5	5	5	5	5	5	5	5	6	5	6	6	6	6	6	5	5	6	无	6	6	5.75	5.91667	4.75
36	2	2	1	1	2	2	2	1	1	1	1	4	4	3	5	4	3	4	4	4	4	4	4	4	4	4	4	5	5	5	5	5	4	5	5	5	5	5	5	5	5	5	5	越来越好	4	3.75	4	3.91667	4
37	1	2	2	1	4	1	1	4	2	1	1	7	4	7	7	7	7	7	7	7	7	7	7	7	7	7	7	7	7	7	7	7	7	7	7	7	7	7	7	7	7	7	7	无	6.25	7	7	6.75	7
38	1	2	3	1	2	1	2	1	1	2	3	7	7	7	7	7	7	7	7	7	7	4	7	6	7	7	7	6	7	7	6	6	7	7	7	7	7	7	7	7	7	7	7	无	7	7	6.25	6.75	6.75
39	1	2	3	1	2	2	2	5	2	3	1	5	5	5	5	5	4	4	5	5	5	4	4	5	5	5	4	5	5	4	4	5	5	4	5	5	4	4	4	4	5	4	4	没了	5	4.5	4.5	4.66667	4.75
40	2	2	5	1	4	1	1	4	2	1	1	4	4	4	4	4	4	4	4	4	4	4	4	4	4	4	4	4	4	4	4	4	4	4	4	4	4	4	4	4	4	4	4	无	4	4	4	4	4
41	2	2	3	1	3	1	1	1	1	3	1	7	4	4	7	1	1	1	1	3	3	3	3	4	4	4	4	4	4	4	4	4	4	4	4	4	4	4	4	4	4	4	4	无	5.5	1	3	3.16667	4
42	2	2	2	1	3	1	1	4	2	3	1	4	4	4	4	3	2	2	3	3	3	3	3	2	3	2	3	7	4	4	3	2	3	2	3	5	7	7	7	5	5	5	5	无	4	2.5	3	3.16667	2.5
43	2	2	2	1	4	1	1	2	1	2	1	6	6	6	4	4	6	5	5	3	5	5	1	7	6	4	4	5	5	5	5	5	5	5	5	4	4	4	4	5	5	5	6	无	5.5	5	3.5	4.66667	5.25
44	1	2	3	1	3	1	1	5	1	2	3	5	1	7	4	7	6	5	4	4	4	6	7	3	6	6	5	7	7	5	7	5	5	5	5	5	5	5	5	5	5	5	5	没有	4.25	5.5	5.25	5	5
45	2	2	3	1	4	1	1	2	2	3	1	4	4	4	4	4	4	4	4	4	4	4	4	4	4	4	4	4	4	4	4	4	4	4	4	4	4	4	4	4	4	4	4	无	4	4	4	4	4
46	2	2	5	1	2	2	2	1	2	1	1	5	5	5	5	5	5	5	5	5	5	4	5	5	4	5	5	5	4	5	5	5	5	5	5	5	5	5	5	5	5	5	5	无	5	5	4.75	4.91667	4.75
47	2	1	5	1	2	1	2	4	2	1	1	5	5	5	5	2	2	2	2	5	5	4	4	5	5	3	3	4	3	3	4	2	5	3	3	5	3	5	5	3	3	3	3	无	5	2	4.5	3.83333	4
48	1	2	3	1	4	2	1	3	1	2	1	4	5	5	4	4	4	4	4	4	4	4	4	4	4	4	4	4	4	4	4	4	4	4	4	4	4	4	4	4	4	4	4	提高专业能力	4.5	4	4	4.16667	4
49	2	2	5	1	4	2	2	1	1	1	1	7	7	7	7	7	7	7	7	7	7	7	7	7	7	7	7	7	7	7	7	7	7	7	7	7	7	7	7	7	7	7	7	无	7	7	7	7	7
50	2	2	5	1	4	1	1	1	2	2	1	4	3	4	6	3	3	4	4	3	4	4	4	4	4	4	5	7	7	5	6	4	5	4	6	5	5	4	7	6	5	6	5	无	4.25	3.5	3.75	3.83333	4.25
51	2	2	3	1	4	1	2	2	2	2	1	5	4	4	4	5	4	4	5	5	4	4	5	5	5	4	5	5	5	6	6	6	6	6	6	6	6	6	5	6	5	6	5	无	4.25	4.5	4.5	4.41667	4.75
52	2	4	3	1	2	1	1	2	2	2	3	6	6	6	6	6	6	6	6	6	6	6	6	6	6	6	6	6	6	6	6	6	6	6	6	6	6	6	6	6	6	6	6	无	6	6	6	6	6
53	2	2	5	1	4	1	1	2	2	1	3	3	5	2	3	4	3	4	5	3	3	4	4	4	3	3	4	7	6	5	4	3	4	4	5	5	4	5	5	5	5	5	4	无	3.25	4	3.5	3.58333	3.5
54	1	2	3	1	4	1	1	2	1	1	1	6	5	7	5	7	6	7	4	7	5	7	7	5	5	5	7	5	6	4	7	5	6	6	7	6	5	5	7	6	7	5	7	无	5.75	6	6.5	6.08333	5.5
55	2	4	2	1	4	1	1	1	2	2	3	6	5	4	6	5	5	6	6	6	6	6	6	6	6	6	5	6	6	5	6	6	7	6	6	5	5	5	5	6	7	6	6	无	5.25	5.5	6	5.58333	5.75
56	2	2	5	1	4	1	1	2	2	3	1	4	4	4	3	3	3	3	3	3	3	3	3	4	2	3	4	5	4	4	3	3	3	2	4	4	5	4	4	4	5	4	4	只有课堂上讲的，没有真实上手操作过	3.75	3	3	3.25	3.25
57	2	2	5	1	4	1	1	2	2	1	1	5	4	7	5	5	4	6	7	7	7	7	6	5	4	5	5	7	6	7	6	4	7	6	6	7	7	7	7	7	6	6	6	无	5.25	5.5	6.75	5.83333	4.75
58	2	2	3	1	4	2	2	1	1	1	1	7	7	5	5	4	3	5	4	4	4	5	3	7	7	7	7	7	7	7	7	7	7	7	7	7	7	7	7	7	7	7	7	少些课堂内容 多些专业相关实践	6	4	4	4.66667	7
59	1	1	1	1	1	3	3	3	1	1	1	4	4	5	4	4	2	2	3	4	3	3	3	3	4	3	3	3	4	3	3	5	2	5	3	5	5	5	5	5	2	5	2	无	4.25	2.75	3.25	3.41667	3.25
60	2	1	1	1	4	2	2	1	1	2	4	4	4	4	4	4	4	4	4	4	4	4	4	4	4	4	4	4	4	4	4	4	4	4	4	4	4	4	4	4	4	4	4	无	4	4	4	4	4
61	1	1	1	1	3	1	1	1	1	1	1	7	7	7	7	7	7	7	7	7	7	7	7	7	7	7	7	7	7	7	7	7	7	7	7	7	7	7	7	7	7	7	7	无	7	7	7	7	7
62	1	1	1	1	1	3	3	3	2	3	4	4	4	4	4	4	4	4	4	4	4	4	4	4	4	4	4	4	4	4	4	4	4	4	4	4	4	4	4	4	4	4	4	无	4	4	4	4	4
63	2	1	1	1	4	1	1	1	2	1	1	4	4	4	6	5	5	5	5	5	5	5	5	5	5	5	5	6	5	5	5	4	4	4	4	4	5	5	5	6	6	6	6	无	4.5	5	5	4.83333	5
64	1	1	5	1	3	2	2	5	2	2	1	5	5	5	5	5	5	5	5	5	5	5	5	5	5	5	5	5	5	5	5	5	5	5	5	5	5	5	5	5	5	5	5	无	5	5	5	5	5
65	2	1	1	1	4	2	1	1	1	2	4	3	1	3	4	4	4	4	4	4	4	3	4	4	3	4	4	3	4	4	3	4	5	4	5	5	4	5	4	5	5	4	5	无	2.75	4	3.75	3.5	3.75
66	1	1	1	1	3	1	1	5	2	1	2	7	7	7	7	7	7	7	7	7	7	7	7	7	7	7	7	7	7	7	7	7	7	7	7	7	7	7	7	7	7	7	7	无	7	7	7	7	7
67	2	1	2	1	1	2	3	3	1	1	3	2	3	5	6	3	5	7	6	4	5	6	6	5	3	5	6	6	6	6	6	6	6	3	7	6	4	3	6	4	3	2	3	无	4	5.25	5.25	4.83333	4.75
68	1	1	1	1	4	1	1	1	1	1	1	7	7	7	7	7	7	7	7	7	7	7	7	7	7	7	7	7	7	7	7	7	7	7	7	7	7	7	7	7	7	7	7	无	7	7	7	7	7
69	1	1	1	1	2	1	1	3	2	1	1	5	1	2	3	1	1	1	1	1	1	1	1	1	1	1	1	4	2	2	1	1	1	1	1	5	5	3	3	3	2	2	2	无	2.75	1	1	1.58333	1
70	1	1	1	1	4	1	1	1	1	1	1	7	7	7	7	1	1	1	1	1	1	1	1	1	1	1	1	1	1	1	1	1	1	1	1	1	1	1	1	1	1	1	1	无	7	1	1	3	1
71	1	1	1	1	2	3	3	1	1	1	1	6	2	4	6	4	4	4	5	5	5	5	5	4	5	6	6	4	5	6	5	5	5	5	5	6	6	5	6	6	6	6	6	无	4.5	4.25	5	4.58333	5.25
72	1	1	1	1	4	1	1	5	2	2	3	2	2	2	2	2	2	2	2	2	2	2	2	2	2	2	2	2	2	2	2	2	2	2	2	2	2	2	2	2	2	2	2	无	2	2	2	2	2
73	2	1	2	1	4	1	1	1	2	3	4	5	5	4	5	5	4	5	5	5	4	5	5	5	4	5	5	6	4	5	5	4	5	4	5	5	6	6	6	5	4	5	4	无	4.75	4.75	4.75	4.75	4.75
74	2	1	2	1	4	2	1	2	2	2	1	3	3	3	3	3	2	3	4	4	4	4	4	3	4	4	4	2	5	3	3	4	5	4	3	3	2	3	4	4	4	4	4	无	3	3	4	3.33333	3.75
75	1	1	1	1	2	2	2	1	2	1	4	5	5	5	5	5	5	5	5	5	5	5	5	5	5	5	5	5	5	5	5	5	5	5	5	5	5	5	5	5	5	5	5	.	5	5	5	5	5
76	2	1	1	1	4	1	2	1	2	1	1	7	7	5	6	5	5	4	4	6	6	6	7	6	7	6	7	6	4	5	3	4	4	4	6	6	7	7	7	7	7	7	6	无	6.25	4.5	6.25	5.66667	6.5
77	2	1	1	1	3	1	2	4	2	1	1	6	6	6	6	4	4	4	4	4	4	4	4	4	4	4	4	4	4	4	4	4	4	4	4	4	4	4	4	4	4	4	4	没有	6	4	4	4.66667	4
78	2	2	5	1	2	2	2	5	2	3	4	4	4	4	4	4	4	4	4	4	4	4	4	4	4	4	4	4	4	4	4	4	4	4	4	4	4	4	4	4	4	4	4	无	4	4	4	4	4
79	2	2	5	1	4	1	1	3	2	3	1	7	6	5	5	4	4	5	3	3	3	3	4	4	4	4	4	7	4	7	4	4	4	5	6	7	7	7	7	4	3	4	4	无	5.75	4	3.25	4.33333	4
80	2	2	3	1	2	2	2	2	2	3	1	6	4	6	5	4	4	4	6	5	6	6	6	6	4	5	6	6	5	5	4	5	6	5	6	6	6	6	6	5	5	5	5	无	5.25	4.5	5.75	5.16667	5.25
81	2	1	1	1	2	3	3	1	1	2	4	6	6	6	6	7	7	7	7	7	7	7	7	7	7	7	7	7	7	7	7	7	7	7	7	7	7	7	7	7	7	7	7	无	6	7	7	6.66667	7
82	2	2	5	1	4	2	1	1	1	2	1	5	5	5	5	5	5	5	5	5	5	5	5	5	5	5	5	5	5	5	5	5	5	5	5	5	5	5	5	5	5	5	5	无	5	5	5	5	5
83	1	1	2	1	2	1	1	5	2	2	1	6	6	6	6	6	6	6	6	6	6	6	6	6	6	6	7	7	6	6	6	6	6	6	6	5	6	6	7	6	6	6	6	无	6	6	6	6	6.25
84	1	1	2	1	4	1	1	2	2	2	1	7	7	7	7	7	7	7	7	7	7	7	7	7	7	7	7	7	7	7	7	7	7	7	7	7	7	7	7	7	7	7	7	无	7	7	7	7	7
85	1	1	2	1	2	2	2	1	1	1	1	6	4	4	6	4	3	3	3	5	4	4	3	3	3	3	3	4	3	3	3	3	3	4	4	5	5	5	5	4	3	4	4	我觉得还没特别清晰自己未来的职业方向	5	3.25	4	4.08333	3
86	2	1	1	1	4	2	2	3	2	1	4	7	5	5	7	5	6	7	7	7	7	7	7	7	7	7	7	7	5	6	6	4	6	6	5	7	7	7	7	7	7	7	7	无	6	6.25	7	6.41667	7
87	2	2	2	1	2	2	2	4	2	2	1	5	5	5	5	5	5	4	4	4	4	5	5	5	5	5	5	5	4	5	4	5	4	5	4	5	4	5	4	5	4	5	4	无	5	4.5	4.5	4.66667	5
88	1	1	1	1	4	1	1	3	2	2	1	7	7	7	7	7	7	7	7	7	7	7	7	7	7	7	7	7	7	7	7	7	7	7	7	7	7	7	7	7	7	7	7	无	7	7	7	7	7
89	2	1	5	1	2	2	2	1	2	2	1	7	6	5	6	6	6	6	6	6	7	7	6	5	5	5	5	7	6	5	3	1	6	4	7	6	5	6	6	5	5	5	5	多分析一下当下行业的就业形势	6	6	6.5	6.16667	5
90	2	2	5	1	4	2	2	1	1	2	1	4	4	4	4	3	3	4	3	5	4	4	4	5	4	4	4	6	4	3	4	3	5	4	5	4	4	4	4	4	4	4	4	我觉得职业本科更应该注重实践方面的教学，学习实操技能而非一直在教室上课，枯燥又无用老师每天都在讲自己，	4	3.25	4.25	3.83333	4.25
91	2	1	1	1	4	1	1	2	2	1	4	3	1	4	3	3	3	3	4	3	3	3	3	3	3	3	3	3	3	3	3	3	3	3	3	4	4	4	4	3	3	4	3	无	2.75	3.25	3	3	3
92	2	1	1	1	4	1	1	4	2	1	1	6	6	6	6	6	6	6	6	6	6	6	6	6	6	6	6	6	6	6	6	6	6	6	6	6	6	6	6	6	6	6	6	无	6	6	6	6	6
93	2	1	1	1	4	2	1	3	1	1	1	6	6	6	6	6	6	5	6	5	6	6	5	6	6	4	5	6	4	4	5	5	6	5	7	6	5	5	6	5	6	5	6	无	6	5.75	5.5	5.75	5.25
94	2	2	5	1	4	1	1	2	2	1	1	4	5	4	5	5	4	5	4	5	4	4	4	5	5	5	5	6	6	6	6	3	5	5	5	5	5	5	5	5	5	5	5	多组织技能课程	4.5	4.5	4.25	4.41667	5
95	1	1	1	1	2	3	2	3	2	1	1	6	5	5	6	4	3	4	5	3	4	5	4	3	4	5	4	5	4	5	4	3	4	5	4	5	4	5	4	4	5	4	4	无	5.5	4	4	4.5	4
96	2	2	5	1	4	1	1	1	2	1	1	7	7	7	7	7	7	7	7	7	7	7	7	7	7	7	7	7	7	7	7	7	7	7	7	7	7	7	7	7	7	7	7	无	7	7	7	7	7
97	1	1	1	1	3	2	1	3	2	3	1	5	4	6	5	5	4	5	6	4	4	5	5	4	3	5	5	5	4	6	4	5	4	5	4	6	6	6	6	6	4	6	3	无	5	5	4.5	4.83333	4.25
98	1	1	1	1	4	2	1	4	2	2	4	6	6	6	6	6	6	6	6	6	6	6	6	6	6	6	6	6	6	6	6	6	6	6	6	6	6	6	6	6	6	6	6	无	6	6	6	6	6
99	1	2	3	1	4	1	1	5	2	2	1	4	4	4	4	4	4	4	4	4	4	4	4	4	4	4	4	4	4	4	4	4	4	4	4	4	4	4	4	4	4	4	4	无	4	4	4	4	4
100	1	2	3	1	3	1	1	4	2	1	1	4	4	4	4	4	4	4	4	4	4	4	4	4	4	4	4	4	4	4	4	4	4	4	4	4	4	4	4	4	4	4	4	无	4	4	4	4	4
101	1	1	1	1	4	1	1	2	1	1	1	7	7	7	7	7	7	7	7	7	7	7	7	7	7	7	7	7	7	7	7	7	7	7	7	7	7	7	7	7	7	7	7	无	7	7	7	7	7
102	2	2	3	1	2	2	2	1	1	1	1	5	3	3	5	3	3	3	3	5	4	5	4	6	4	5	6	6	5	5	7	5	5	6	5	5	5	4	7	6	6	6	7	无	4	3	4.5	3.83333	5.25
103	2	2	5	2	4	1	1	2	2	1	4	3	4	5	6	5	5	5	5	4	3	5	5	5	4	3	3	7	3	4	3	5	3	5	4	4	4	7	6	5	4	5	4	无	4.5	5	4.25	4.58333	3.75
104	2	2	5	1	4	1	1	2	2	1	1	7	6	6	7	6	6	6	6	6	6	6	6	6	6	6	6	6	6	6	6	6	6	6	6	6	6	6	6	6	6	6	6	无	6.5	6	6	6.16667	6
105	1	2	5	1	3	2	2	4	2	3	1	7	7	7	7	7	7	7	7	7	7	7	7	7	7	7	7	7	7	7	7	7	7	7	7	7	7	7	7	7	7	7	7	无	7	7	7	7	7
106	1	2	2	1	2	3	2	1	1	1	4	7	7	7	7	7	7	7	7	7	7	7	7	7	7	7	7	7	7	7	7	4	4	5	4	7	7	7	7	7	7	7	7	学习	7	7	7	7	7
107	2	2	5	1	4	1	1	2	2	1	4	3	1	2	4	3	2	6	2	2	6	2	4	5	6	6	5	7	3	6	5	1	2	2	1	4	4	3	7	4	2	2	1	无	2.5	3.25	3.5	3.08333	5.5
108	2	2	3	1	4	2	2	4	2	1	1	4	1	2	5	4	3	5	3	3	3	3	4	5	2	2	4	6	2	4	4	2	2	3	3	5	4	4	6	4	4	4	3	无	3	3.75	3.25	3.33333	3.25
109	2	1	2	2	4	1	1	2	2	2	1	4	3	5	5	4	4	5	5	3	4	5	5	3	3	3	4	4	4	4	3	3	4	3	5	5	5	5	5	4	5	5	5	现在没有	4.25	4.5	4.25	4.33333	3.25
110	2	1	5	1	4	1	2	1	1	1	1	6	6	6	6	6	6	6	6	6	6	6	6	6	6	6	6	6	6	6	6	6	6	6	6	6	6	6	6	6	6	6	6	无	6	6	6	6	6
111	2	4	2	1	4	2	1	1	1	1	1	7	7	7	7	7	7	7	7	7	7	7	7	7	7	7	7	7	7	7	7	7	7	7	7	7	7	7	7	7	7	7	7	无	7	7	7	7	7
112	1	1	5	1	3	1	1	5	2	3	1	4	3	4	5	3	3	5	5	3	3	3	3	3	4	4	5	4	3	3	3	4	3	4	4	4	4	4	4	4	5	5	5	无	4	4	3	3.66667	4
113	1	1	5	1	4	1	2	1	1	2	1	5	4	4	4	3	5	5	3	4	5	5	5	4	3	5	5	6	2	1	4	5	5	5	5	6	3	5	3	6	3	5	5	本专业的跨境电商运营、国际贸易、跨境物流等核心课程，为我从事跨境电商相关岗位搭建了完整的知识体系；课堂中的平台实操实训、企业实习等实践环节，让我掌握了店铺运营、选品、客户沟通等实用技能，为我未来的职业发展提供了有力支撑。	4.25	4	4.75	4.33333	4.25
114	2	1	5	1	3	2	1	3	2	1	4	3	3	3	4	3	3	3	2	2	4	5	5	3	3	3	4	6	5	5	3	3	4	3	3	5	5	3	5	5	4	3	5	无	3.25	2.75	4	3.33333	3.25
115	1	1	2	1	3	1	2	5	2	1	1	3	3	3	5	3	3	4	5	5	5	5	4	3	3	3	4	7	3	3	2	2	3	3	3	4	4	5	5	4	4	4	3	水课少一点，专业理论实践课程多一些	3.5	3.75	4.75	4	3.25
116	2	1	5	1	1	1	1	1	1	1	3	6	5	5	5	5	5	5	5	5	5	5	5	5	5	5	5	5	5	5	5	5	5	5	5	5	5	5	5	5	5	5	5	1	5.25	5	5	5.08333	5
117	2	2	5	1	4	1	1	2	2	2	1	5	6	6	6	3	3	5	4	5	6	6	4	3	4	5	5	5	3	5	6	6	6	6	6	6	6	6	6	6	6	6	6	没有	5.75	3.75	5.25	4.91667	4.25
118	1	2	3	1	4	1	1	4	2	2	1	4	4	4	4	4	4	4	4	4	4	4	4	4	4	4	4	4	4	4	4	4	4	4	4	4	4	4	4	4	4	4	4	无	4	4	4	4	4
119	1	2	3	1	2	2	1	1	1	2	1	4	5	5	5	5	5	5	5	4	5	5	5	5	5	5	5	5	5	5	5	1	4	3	5	4	3	4	4	3	3	4	4	多出去实践一下比较好	4.75	5	4.75	4.83333	5
120	1	2	3	1	2	1	1	5	2	3	1	1	1	7	7	7	7	7	7	7	1	1	1	1	1	1	1	4	2	1	1	1	1	4	1	1	1	1	1	1	1	1	1	无	4	7	2.5	4.5	1
121	2	1	5	1	2	2	1	3	2	1	1	2	6	4	6	6	6	6	7	4	6	6	2	2	2	2	3	3	1	4	2	2	7	2	7	2	2	4	4	2	2	7	2	无	4.5	6.25	4.5	5.08333	2.25
122	2	4	2	1	4	1	1	2	2	1	1	5	4	5	4	3	3	5	4	5	5	5	5	5	4	4	3	5	4	3	3	3	5	5	3	3	3	3	3	5	4	5	4	无	4.5	3.75	5	4.41667	4
123	2	1	5	1	3	3	3	1	1	2	1	4	3	3	4	2	2	2	2	2	2	3	3	2	2	2	2	3	3	3	3	3	3	3	3	4	4	4	4	5	5	5	5	多实践	3.5	2	2.5	2.66667	2
124	1	2	5	1	3	1	1	5	2	3	4	4	4	4	4	4	4	4	4	4	4	4	4	4	4	4	4	4	4	4	4	4	4	4	4	4	4	4	4	4	4	4	4	无	4	4	4	4	4
125	2	2	1	1	4	1	1	1	1	2	1	5	5	5	5	4	4	4	4	4	4	4	4	4	4	4	4	4	4	4	4	4	4	4	4	4	4	4	4	4	4	4	4	多开设实践课程	5	4	4	4.33333	4
126	2	1	2	1	1	3	3	5	2	1	1	4	5	3	5	3	3	4	3	3	6	6	3	4	4	4	4	6	3	6	3	2	2	4	5	4	4	4	4	5	5	4	5	无	4.25	3.25	4.5	4	4
127	1	1	1	1	4	1	1	3	2	2	3	7	7	7	7	7	7	7	7	7	7	7	7	7	7	7	7	7	7	7	7	7	7	7	7	7	7	7	7	7	7	7	7	无建议	7	7	7	7	7
128	2	2	3	1	4	1	1	2	1	2	1	5	5	5	5	5	5	5	5	4	4	4	4	3	3	3	3	4	4	4	4	4	5	4	5	5	5	5	5	5	5	5	5	无	5	5	4	4.66667	3
129	2	1	3	1	4	1	1	1	1	2	4	5	3	4	5	3	3	4	3	2	4	4	3	2	3	3	4	3	4	4	5	3	5	3	4	3	3	3	4	4	3	4	4	更多的加强与企业项目对口链接	4.25	3.25	3.25	3.58333	3
130	1	2	4	1	3	1	1	4	1	2	1	5	4	3	4	3	4	3	3	2	4	3	4	4	3	4	5	5	4	5	2	2	2	3	3	4	4	3	3	5	5	5	5	多结合实践或者实际应用时的场景能更好的帮助我学习	4	3.25	3.25	3.5	4
131	1	3	1	1	2	3	1	1	1	2	1	5	5	5	5	5	5	5	5	5	5	5	5	5	5	5	5	5	5	5	5	5	5	5	5	5	5	5	5	5	5	5	5	无	5	5	5	5	5
132	1	3	1	1	2	3	2	2	2	1	2	5	3	6	5	5	6	5	6	5	4	6	5	6	5	5	5	6	5	6	6	5	5	6	5	5	6	6	5	5	6	5	5	无	4.75	5.5	5	5.08333	5.25
133	2	3	2	1	2	2	2	1	1	1	1	7	7	7	7	6	7	7	7	7	7	7	7	7	7	7	7	7	7	7	7	7	7	7	7	7	7	7	7	7	7	7	7	增加社会实践	7	6.75	7	6.91667	7
134	2	2	5	1	4	2	2	4	2	1	1	5	4	4	4	4	4	4	4	4	4	4	4	4	4	4	4	4	4	4	4	4	4	4	4	4	4	4	4	4	4	4	4	挺好的	4.25	4	4	4.08333	4
135	1	1	1	1	2	3	3	1	1	1	1	7	7	7	7	7	7	7	7	7	7	7	7	7	7	7	7	7	7	7	7	7	7	7	7	7	7	7	7	7	7	7	7	无	7	7	7	7	7
136	1	1	1	1	4	3	3	3	1	2	2	5	5	5	4	4	5	5	4	4	4	5	5	4	4	4	5	4	4	5	5	4	4	4	5	4	4	4	4	4	4	4	4	无	4.75	4.5	4.5	4.58333	4.25
137	2	2	3	1	2	3	3	1	1	1	2	7	6	5	6	6	6	6	6	6	6	6	6	6	6	6	6	7	6	6	5	6	6	4	6	7	7	7	7	6	6	6	6	无	6	6	6	6	6
138	1	2	3	1	4	2	2	4	2	1	1	7	7	7	7	7	7	7	7	7	7	7	7	7	7	7	7	7	7	7	7	7	7	7	7	7	7	7	7	7	7	7	7	无	7	7	7	7	7
139	2	2	2	1	4	1	1	5	2	2	1	4	4	4	4	5	3	4	4	4	4	4	4	4	4	4	4	4	4	4	4	4	4	4	4	4	4	4	4	4	4	4	4	无	4	4	4	4	4
140	1	1	1	1	4	2	2	1	2	2	1	2	1	1	1	1	1	1	2	1	1	1	1	1	1	1	1	1	1	1	1	1	1	1	1	1	1	5	1	1	1	1	1	无	1.25	1.25	1	1.16667	1
141	2	2	2	1	4	2	2	3	2	2	1	7	7	7	7	7	7	7	7	7	7	7	7	7	7	7	7	7	7	7	7	7	7	7	7	7	7	7	7	7	7	7	7	无	7	7	7	7	7
142	2	2	2	1	2	1	1	1	1	1	3	5	5	5	5	5	5	5	5	5	5	5	5	5	5	5	5	6	6	6	5	4	5	5	5	5	4	5	5	5	5	5	5	无	5	5	5	5	5
143	2	2	2	1	2	3	3	2	1	1	1	4	4	4	4	4	4	4	4	4	4	4	4	4	4	4	4	4	4	4	4	4	4	4	4	4	4	4	4	4	4	4	4	无	4	4	4	4	4
144	2	2	2	1	2	1	1	4	2	2	3	5	5	5	5	4	4	4	4	4	4	4	4	4	4	4	4	4	4	4	4	4	4	4	4	4	4	4	4	4	4	4	4	无	5	4	4	4.33333	4
145	2	2	2	1	4	2	4	2	2	1	1	4	3	4	4	3	3	4	4	4	5	4	4	5	4	3	4	5	4	4	3	4	5	3	4	4	4	4	4	4	4	3	4	无	3.75	3.5	4.25	3.83333	4
146	2	2	2	1	4	2	2	3	2	1	1	7	4	6	6	5	5	5	5	5	5	5	5	5	5	5	5	5	5	5	5	5	5	5	5	5	5	5	5	5	5	5	5	无	5.75	5	5	5.25	5
147	2	2	5	1	3	2	2	2	2	1	1	7	7	7	7	7	7	7	7	7	7	7	7	7	7	7	7	7	7	7	7	7	7	7	7	7	7	7	7	7	7	7	7	无	7	7	7	7	7
148	2	2	2	1	4	1	2	3	2	3	1	4	4	4	4	4	4	4	4	4	4	4	4	5	5	5	5	3	3	3	3	3	3	3	3	4	4	4	4	5	5	5	5	无	4	4	4	4	5
149	2	2	5	2	4	1	1	4	2	3	4	1	1	1	4	1	1	1	1	1	1	1	1	5	5	5	5	5	1	1	1	1	1	1	1	2	1	2	1	1	1	1	1	无	1.75	1	1	1.25	5
150	1	2	5	1	3	1	1	1	1	3	1	2	3	2	3	2	3	2	3	2	3	2	2	2	3	2	2	6	5	6	5	6	5	6	5	6	5	5	5	6	5	6	5	无	2.5	2.5	2.25	2.41667	2.25
151	2	2	2	1	4	2	2	1	2	1	3	7	7	6	6	5	5	5	6	7	6	6	6	6	5	5	5	7	5	5	5	6	7	6	7	7	6	7	7	7	7	7	7	无	6.5	5.25	6.25	6	5.25
152	2	2	2	1	2	1	2	1	1	2	1	4	2	3	5	1	3	3	4	2	2	2	2	2	2	2	2	2	2	2	1	1	3	3	3	4	4	3	3	3	3	3	3	无	3.5	2.75	2	2.75	2
153	2	2	2	1	4	2	1	1	1	1	3	6	6	6	6	6	6	6	6	6	6	6	6	6	6	6	6	6	6	6	6	6	6	6	6	6	6	6	6	6	6	6	6	无	6	6	6	6	6
154	2	4	2	1	4	1	1	3	2	1	3	7	5	7	7	7	6	6	5	7	5	5	6	6	5	6	7	6	4	5	3	5	5	4	4	5	4	5	5	6	5	5	4	可以多点实践	6.5	6	5.75	6.08333	6
155	1	1	3	1	2	3	3	2	1	1	1	7	7	7	7	7	7	7	7	7	7	7	7	7	7	7	7	7	7	7	7	7	7	7	7	7	7	7	7	7	7	7	7	五	7	7	7	7	7
156	2	2	2	1	4	1	1	4	2	2	3	3	3	3	3	3	3	3	3	3	3	3	3	3	3	3	3	4	4	4	4	4	4	4	4	4	4	4	4	4	4	4	4	无	3	3	3	3	3
157	2	2	2	1	4	1	1	1	1	1	1	6	5	7	5	6	5	6	5	6	6	6	6	6	6	6	6	6	6	6	6	6	6	6	6	6	6	7	6	4	6	6	5	无	5.75	5.5	6	5.75	6
158	2	2	2	1	2	2	2	1	2	1	1	7	7	7	7	7	7	7	7	7	7	7	7	7	7	7	7	7	7	7	7	7	7	7	7	7	7	7	7	7	7	7	7	无	7	7	7	7	7
159	2	2	1	1	2	3	2	1	1	1	1	7	7	7	7	7	7	7	7	7	7	7	7	7	7	7	7	7	7	7	7	7	7	7	7	7	7	7	7	7	7	7	7	无	7	7	7	7	7
160	1	2	1	1	4	1	1	2	2	2	4	7	7	7	7	7	7	7	7	7	7	7	7	7	7	7	7	7	7	7	7	7	7	7	7	7	7	7	7	7	7	7	7	无	7	7	7	7	7
161	2	2	2	1	2	3	3	1	1	1	3	5	5	5	5	5	5	6	5	5	5	5	5	5	4	3	5	5	4	4	4	3	6	5	5	5	4	4	6	6	5	5	5	无	5	5.25	5	5.08333	4.25
162	1	2	1	1	4	1	1	3	2	3	4	3	3	3	3	3	3	3	3	3	3	3	3	3	3	3	3	3	3	3	3	3	3	3	3	3	3	3	3	3	3	3	3	无	3	3	3	3	3
163	2	2	5	1	2	2	2	3	2	1	1	6	5	6	7	6	6	6	6	6	5	6	6	6	5	5	6	6	6	6	6	5	6	5	6	6	6	6	6	6	6	6	6	无	6	6	5.75	5.91667	5.5
164	2	2	2	2	3	1	1	5	1	1	1	7	7	7	7	7	7	7	7	7	7	7	7	7	7	7	7	7	7	7	7	7	7	7	7	7	7	7	7	7	7	7	7	无	7	7	7	7	7
165	2	2	2	1	2	1	1	2	2	3	1	4	4	4	4	4	4	4	4	4	4	4	4	4	4	4	4	4	4	4	4	4	4	4	4	4	4	4	4	4	4	4	4	无	4	4	4	4	4
166	2	2	2	1	2	2	2	1	2	2	1	5	3	4	4	3	3	3	3	4	4	4	4	4	4	4	4	4	4	4	4	4	4	4	4	4	4	4	4	4	4	4	4	无	4	3	4	3.66667	4
167	2	2	1	1	3	2	2	2	2	1	1	7	7	7	7	7	7	7	7	7	7	7	7	7	7	7	7	7	7	7	7	7	7	7	7	7	7	7	7	7	7	7	7	无	7	7	7	7	7
168	2	2	1	1	4	1	1	1	2	1	1	7	4	3	3	4	4	4	4	4	4	4	4	4	4	4	4	7	4	5	4	4	4	4	6	4	6	6	4	5	5	5	5	无	4.25	4	4	4.08333	4
169	2	2	2	1	4	1	1	3	2	2	1	3	3	3	3	3	3	3	3	3	3	3	3	3	3	3	3	3	3	3	3	3	3	3	3	3	3	3	3	3	3	3	3	没有不足	3	3	3	3	3
170	1	2	3	1	4	1	1	3	2	2	1	7	4	3	7	4	4	4	4	4	4	4	4	5	4	4	4	4	4	4	4	1	4	4	4	5	2	2	4	4	4	4	4	🕶	5.25	4	4	4.41667	4.25
171	2	2	1	1	4	1	1	1	2	2	3	5	4	4	4	5	3	4	4	5	4	4	5	3	3	3	4	6	4	4	2	3	3	4	4	4	4	4	6	2	2	2	4	增多一下实践活动	4.25	4	4.5	4.25	3.25
172	2	2	2	2	3	1	2	2	1	1	1	7	7	7	7	7	7	7	7	7	7	7	7	7	7	7	7	7	7	7	7	7	7	7	7	7	7	7	7	7	7	7	7	无	7	7	7	7	7
173	1	2	1	1	4	1	2	1	2	1	4	1	1	3	3	1	1	1	1	3	3	3	2	3	3	3	3	7	3	5	4	1	4	1	1	4	6	5	7	5	4	4	5	无	2	1	2.75	1.91667	3
174	1	2	2	1	4	2	1	5	2	2	1	3	3	3	3	3	3	3	3	3	3	3	3	3	3	3	3	3	3	3	3	3	3	3	3	3	3	3	3	3	3	3	3	可以	3	3	3	3	3
175	1	2	1	1	4	3	2	3	2	1	1	4	4	4	4	4	4	4	4	4	4	4	4	4	4	4	4	4	4	4	4	4	4	4	4	5	5	5	5	5	5	5	5	无	4	4	4	4	4
176	1	1	1	1	4	1	1	1	1	2	4	5	5	5	5	5	5	5	5	5	5	5	5	5	5	5	5	5	5	5	5	5	5	5	5	5	5	5	5	5	5	5	5	无	5	5	5	5	5
177	1	2	1	1	4	1	2	3	2	2	1	5	4	4	5	4	4	5	5	4	4	4	4	4	4	4	5	7	4	4	4	4	6	5	6	6	7	6	6	5	4	5	4	没有	4.5	4.5	4	4.33333	4.25
178	2	2	1	1	4	1	1	2	2	1	1	5	2	2	4	2	3	5	2	2	4	3	4	3	4	4	4	4	3	4	3	1	4	5	5	4	4	5	6	1	1	2	1	内容难理解，不知道具体应用	3.25	3	3.25	3.16667	3.75
179	2	2	5	1	4	1	1	3	2	3	4	5	5	6	6	5	5	5	5	5	5	4	6	4	5	5	5	5	4	5	5	5	5	5	5	5	5	5	5	5	5	5	5	没有	5.5	5	5	5.16667	4.75
180	1	3	3	1	2	3	3	1	1	1	1	6	6	6	6	6	6	6	6	6	6	6	6	6	6	6	6	6	6	6	6	6	6	6	6	6	6	6	6	6	6	6	6	无	6	6	6	6	6
181	2	3	2	1	2	2	2	1	1	2	1	4	4	4	4	4	4	4	4	4	4	4	4	4	4	4	4	4	4	4	4	4	4	4	4	4	4	4	4	4	4	4	4	无	4	4	4	4	4
182	2	3	2	1	4	1	1	4	2	1	3	7	7	7	7	7	7	7	7	7	7	7	7	7	7	7	7	7	7	7	7	7	7	7	7	7	7	7	7	5	5	5	5	无	7	7	7	7	7
183	2	2	2	1	4	1	1	1	1	3	1	3	3	3	3	3	3	3	3	3	3	3	3	3	3	3	3	3	3	3	3	3	3	3	3	3	3	3	3	3	3	3	3	无	3	3	3	3	3
184	2	3	2	1	2	1	1	2	1	1	1	3	4	4	3	3	4	3	3	3	4	2	4	4	3	4	4	5	2	5	4	4	4	3	6	4	5	5	5	5	5	5	4	无	3.5	3.25	3.25	3.33333	3.75
185	2	3	2	1	4	2	2	3	2	1	1	5	4	4	4	5	4	5	4	4	4	5	4	5	4	5	5	5	4	5	5	4	5	5	4	4	4	5	5	4	5	5	5	。	4.25	4.5	4.25	4.33333	4.75
186	2	2	2	1	4	1	1	2	2	3	3	6	6	6	6	5	4	5	3	6	3	3	6	5	4	4	5	5	5	5	5	5	5	5	5	5	5	5	5	5	5	5	5	无	6	4.25	4.5	4.91667	4.5
187	2	2	2	1	3	1	1	2	2	1	1	6	6	5	3	4	4	4	6	4	5	5	5	4	4	4	4	6	5	5	4	4	6	5	6	5	5	5	6	6	4	6	4	无	5	4.5	4.75	4.75	4
188	1	1	1	1	2	3	3	4	2	1	1	3	3	3	3	3	2	2	5	3	3	3	3	3	3	3	3	3	3	3	3	3	3	3	3	3	3	3	3	3	3	3	3	无	3	3	3	3	3
189	1	1	1	1	2	1	1	3	2	3	1	7	7	7	7	7	7	7	7	7	7	7	7	7	7	7	7	7	7	7	7	7	7	7	7	7	7	7	7	7	7	7	7	无	7	7	7	7	7
190	2	2	2	1	4	1	1	1	1	1	1	4	4	4	4	4	4	4	4	5	5	4	5	4	3	5	3	5	6	5	7	5	6	6	6	6	7	6	6	3	4	3	2	无	4	4	4.75	4.25	3.75
191	2	2	2	2	2	1	1	2	2	1	1	7	7	7	7	7	7	7	7	7	7	7	7	7	7	7	7	7	7	7	7	7	7	7	7	7	7	7	7	7	7	7	7	无	7	7	7	7	7
192	2	3	2	1	2	1	1	1	1	1	1	3	2	6	4	2	2	2	2	5	2	3	4	3	3	2	1	6	5	4	5	1	4	2	1	4	4	4	5	3	1	3	3	实践环节缺少价值	3.75	2	3.5	3.08333	2.25
193	2	3	1	1	4	1	1	1	2	1	1	5	4	5	5	4	4	4	5	5	5	5	5	5	4	4	4	5	4	5	3	3	6	4	4	4	5	5	5	4	4	5	4	无	4.75	4.25	5	4.66667	4.25
194	2	2	5	1	4	1	1	2	2	2	1	7	5	6	7	4	3	3	3	3	3	4	5	4	4	4	4	7	4	4	3	3	3	3	4	5	4	5	6	4	4	4	4	多学一些实操课程	6.25	3.25	3.75	4.41667	4
195	2	2	2	1	2	1	2	1	1	1	3	6	6	6	6	6	6	6	6	6	7	7	6	6	7	6	6	6	6	6	6	6	6	6	6	6	7	7	6	6	6	6	6	没有	6	6	6.5	6.16667	6.25
196	1	3	1	1	3	1	1	3	2	2	4	4	4	4	4	4	4	4	4	4	4	4	4	4	4	4	4	4	4	4	4	2	3	5	4	4	1	2	2	3	4	3	4	无	4	4	4	4	4
197	2	2	5	2	4	3	1	1	2	1	1	5	4	4	4	5	5	5	5	4	4	4	4	5	5	5	5	5	5	5	5	5	5	5	5	5	5	5	5	5	5	5	5	无	4.25	5	4	4.41667	5
198	2	3	1	1	3	1	1	3	1	2	1	4	4	4	4	4	4	4	4	4	4	4	4	4	4	4	4	4	4	4	4	4	4	4	4	4	4	4	4	4	4	4	4	无	4	4	4	4	4
199	2	3	1	1	4	1	1	1	2	1	1	4	4	4	4	4	4	4	4	4	4	4	4	4	4	4	4	4	4	4	4	4	4	4	4	4	4	4	4	4	4	4	4	无	4	4	4	4	4
200	2	3	1	1	4	2	1	3	1	1	1	7	7	7	7	7	7	7	7	7	7	7	7	7	7	7	7	7	7	7	7	7	7	7	7	7	7	7	7	7	7	7	7	都很好，没有不足	7	7	7	7	7
201	2	3	1	1	4	1	1	1	2	1	1	4	3	4	4	4	3	4	4	4	3	4	3	4	3	4	3	4	5	4	5	4	5	4	5	4	3	4	3	4	5	4	5	无	3.75	3.75	3.5	3.66667	3.5
202	2	3	1	2	2	1	2	2	1	1	1	4	4	4	4	4	4	4	4	4	4	4	4	4	4	4	4	4	4	4	4	4	4	4	4	4	4	4	4	4	4	4	4	无	4	4	4	4	4
203	2	2	5	1	4	1	1	1	2	2	1	4	4	3	5	3	4	3	3	4	3	3	3	4	4	4	4	5	5	3	4	4	4	3	4	4	5	3	4	4	4	3	3	无	4	3.25	3.25	3.5	4
204	1	3	1	1	4	1	1	5	2	1	1	4	4	4	4	4	4	4	4	4	4	4	4	4	4	4	4	4	4	4	4	4	4	4	4	4	4	4	4	4	4	4	4	无	4	4	4	4	4
205	1	3	1	1	2	3	3	1	1	2	1	4	4	4	4	4	4	4	4	4	4	4	4	4	4	4	4	4	4	4	4	4	4	4	4	4	4	4	4	4	4	4	4	没有	4	4	4	4	4
206	2	2	2	1	3	2	2	4	2	3	1	5	3	3	5	4	4	4	3	4	6	5	6	7	7	7	7	7	7	7	7	4	7	5	7	7	7	7	7	7	7	7	7	无	4	3.75	5.25	4.33333	7
207	2	2	5	1	3	1	1	4	2	2	1	7	7	7	7	7	7	7	7	7	7	7	7	7	7	7	7	7	7	7	7	7	7	7	7	7	7	7	7	7	7	7	7	于	7	7	7	7	7
208	1	2	2	1	4	3	3	2	2	2	1	3	4	3	5	5	4	3	5	3	4	4	5	5	4	5	5	5	6	6	6	2	5	3	5	5	6	5	5	4	4	4	4	现状很好	3.75	4.25	4	4	4.75
209	1	3	1	1	4	2	2	1	1	1	1	7	7	7	7	7	7	7	7	7	7	7	7	7	7	7	7	7	7	5	5	7	7	7	7	4	7	4	7	7	7	7	7	无	7	7	7	7	7
210	1	3	1	1	4	1	1	1	2	2	1	5	5	4	5	4	4	4	4	1	1	1	1	1	1	1	1	6	4	6	4	3	3	3	3	3	5	5	5	4	4	4	4	无	4.75	4	1	3.25	1
211	1	3	1	2	4	1	1	3	2	1	4	4	3	3	4	2	3	3	2	2	2	2	2	2	2	2	2	5	5	3	3	3	3	3	3	3	3	3	3	5	5	5	5	没有岗位应用的知识	3.5	2.5	2	2.66667	2
212	1	2	2	1	4	1	1	3	2	2	1	3	2	2	3	2	2	2	2	3	2	7	1	2	1	3	2	7	2	3	3	1	6	2	2	3	1	1	4	1	1	1	1	无	2.5	2	3.25	2.58333	2
213	2	2	2	1	3	1	1	2	2	1	1	6	5	6	6	5	5	5	6	6	6	6	6	6	6	6	6	6	5	6	6	5	6	6	6	6	6	6	6	6	6	6	6	无	5.75	5.25	6	5.66667	6
214	2	3	2	1	2	2	2	3	2	3	4	1	1	1	1	1	1	1	1	1	1	1	1	1	1	1	1	1	1	1	1	1	1	1	1	1	1	1	1	1	1	1	1	无	1	1	1	1	1
215	2	3	2	1	2	4	4	2	2	1	4	7	7	7	7	7	7	7	7	7	7	7	7	7	1	7	7	7	7	7	7	7	7	7	7	7	7	7	7	7	7	7	7	无	7	7	7	7	5.5
216	2	2	2	1	4	1	1	1	2	1	1	6	6	6	6	6	6	6	6	6	6	6	6	6	6	6	6	6	6	6	6	6	6	6	6	7	7	7	7	6	6	6	6	无	6	6	6	6	6
217	2	3	2	1	2	3	3	1	1	1	1	4	2	4	4	3	3	3	3	4	4	4	4	4	3	3	3	7	7	7	4	4	6	6	3	6	5	5	5	4	4	4	4	无	3.5	3	4	3.5	3.25
218	2	2	5	1	4	2	1	4	1	1	1	7	7	7	7	7	7	7	7	7	7	7	7	7	7	7	7	7	7	7	7	7	7	7	7	7	7	7	7	7	7	7	7	无	7	7	7	7	7
219	2	3	2	1	4	2	1	5	2	1	1	4	3	5	4	4	3	4	4	4	4	4	4	4	4	4	4	4	4	4	4	4	4	4	4	4	4	4	4	4	4	4	4	无	4	3.75	4	3.91667	4
220	2	3	2	1	4	1	1	2	2	1	1	5	5	5	5	5	5	5	5	5	5	5	5	5	5	5	5	5	5	5	5	5	5	5	5	5	5	5	5	5	5	5	5	无	5	5	5	5	5
221	2	2	2	1	2	2	2	5	2	3	4	3	4	5	4	5	4	3	3	5	3	4	4	4	4	4	4	4	4	4	4	4	4	4	4	4	4	4	4	4	4	4	4	无	4	3.75	4	3.91667	4
222	2	2	2	1	2	3	3	1	2	1	3	2	4	2	5	3	6	5	2	3	2	3	4	2	3	3	3	2	3	2	2	2	2	2	2	2	2	2	2	2	3	3	2	无	3.25	4	3	3.41667	2.75
223	2	2	1	1	3	1	1	2	1	2	2	5	6	6	6	6	6	6	6	6	6	6	6	6	6	6	6	6	6	6	6	6	6	6	6	6	6	6	6	5	6	5	5	无	5.75	6	6	5.91667	6
224	2	2	1	1	4	1	1	3	1	1	3	6	6	6	6	6	6	6	6	6	6	6	5	5	5	6	6	5	6	5	5	5	6	6	6	5	6	5	5	5	4	4	4	无	6	6	5.75	5.91667	5.5
225	2	3	2	1	2	1	1	1	2	1	4	7	1	7	7	5	4	4	4	5	4	4	5	5	6	5	4	6	6	4	4	5	6	5	7	7	7	7	7	7	7	7	7	无	5.5	4.25	4.5	4.75	5
226	2	2	2	1	2	1	1	1	1	1	1	7	7	7	7	7	7	7	7	7	7	7	7	7	7	7	7	7	7	7	7	7	7	7	7	7	7	7	7	7	7	7	7	无	7	7	7	7	7
227	2	3	1	1	3	1	1	3	2	1	1	4	4	4	4	4	4	4	4	4	4	4	4	4	4	4	4	3	4	4	4	4	4	4	4	4	4	4	4	4	4	4	4	无	4	4	4	4	4
228	1	1	1	2	4	1	1	5	2	1	4	1	1	1	1	1	1	1	1	1	1	1	1	3	2	4	2	6	4	4	3	2	3	2	2	5	5	5	5	4	3	4	4	.	1	1	1	1	2.75
229	2	3	2	1	4	1	1	1	2	1	4	1	1	6	2	3	1	2	4	5	3	3	3	2	2	2	4	5	5	5	4	4	4	4	4	4	4	4	4	4	4	4	4	.	2.5	2.5	3.5	2.83333	2.5
230	1	2	1	1	2	1	1	2	1	1	2	5	6	6	6	6	6	5	6	7	6	5	4	6	6	5	6	6	6	5	5	6	6	5	5	7	7	7	7	4	4	6	4	无	5.75	5.75	5.5	5.66667	5.75
231	1	2	2	1	3	1	1	1	2	1	1	4	4	4	4	4	4	4	4	4	4	4	4	4	4	4	4	4	4	4	4	4	4	4	4	4	4	4	4	4	4	4	4	无	4	4	4	4	4
232	2	1	5	1	1	2	2	2	1	1	4	7	7	7	7	7	7	7	7	7	7	7	7	7	7	7	7	7	7	7	7	7	7	7	7	7	7	7	7	7	7	7	7	无	7	7	7	7	7
233	2	1	2	1	1	3	2	3	2	1	1	5	5	5	5	5	5	5	5	5	5	5	5	5	5	5	5	5	5	5	5	5	5	5	5	5	5	5	5	5	5	5	5	哈哈哈	5	5	5	5	5
234	2	2	5	1	4	3	3	1	2	2	4	2	2	2	2	2	2	2	2	2	2	2	2	2	2	2	2	2	2	2	2	2	2	2	2	2	2	2	2	2	2	2	2	无	2	2	2	2	2
235	2	1	3	1	1	1	1	3	2	3	1	6	6	6	6	6	6	6	6	5	5	5	5	4	4	4	4	5	5	5	5	5	5	5	5	4	4	4	4	4	5	4	4	无	6	6	5	5.66667	4
236	2	1	2	1	3	3	3	2	1	2	1	6	6	6	6	6	6	6	6	6	6	6	6	6	6	6	6	6	6	6	6	6	6	6	6	6	6	6	6	6	6	6	6	🈚️	6	6	6	6	6
237	1	1	3	1	4	1	1	1	1	1	1	4	4	4	4	4	4	4	4	4	4	4	4	4	4	4	4	4	4	4	4	4	4	4	4	4	4	4	4	4	4	4	4	无	4	4	4	4	4
238	2	1	5	1	2	3	3	3	2	1	1	5	5	5	5	5	6	5	6	6	5	6	5	5	6	5	5	5	5	6	5	6	5	6	5	6	5	6	5	6	5	6	5	无	5	5.5	5.5	5.33333	5.25
239	2	1	1	1	4	1	1	3	2	1	4	7	7	7	7	7	7	7	7	7	7	7	7	7	7	7	7	7	7	7	7	7	7	7	7	7	7	7	7	7	7	7	7	无	7	7	7	7	7
240	1	2	2	1	2	2	2	3	1	1	4	4	4	4	4	4	4	4	4	4	4	4	4	4	4	4	4	4	4	4	4	4	4	4	4	4	4	4	4	4	4	4	4	无	4	4	4	4	4
241	1	1	2	1	2	3	3	1	1	1	1	7	7	7	7	7	7	7	7	7	7	7	7	7	7	7	7	7	7	7	7	7	7	7	7	7	7	7	7	7	7	7	7	多实践	7	7	7	7	7
242	2	1	1	1	2	1	2	1	1	1	1	3	3	3	4	3	3	3	3	3	3	3	3	3	3	3	3	3	3	3	3	3	3	3	3	3	3	3	3	3	3	3	3	无	3.25	3	3	3.08333	3
243	2	1	2	1	4	1	2	2	2	1	1	3	3	7	5	6	6	5	5	6	6	5	5	4	5	4	4	5	4	4	4	4	6	5	5	5	5	5	6	6	6	6	5	无	4.5	5.5	5.5	5.16667	4.25
244	2	1	2	1	2	3	1	3	2	1	1	5	5	5	5	5	5	5	5	5	5	5	5	5	5	5	5	5	5	5	5	5	5	5	5	5	5	5	5	5	5	5	5	无	5	5	5	5	5
245	2	1	5	1	2	1	1	3	1	1	1	7	4	7	7	7	7	7	7	7	7	7	7	7	7	7	7	7	7	7	7	7	7	7	7	7	7	7	7	7	7	7	7	无	6.25	7	7	6.75	7
246	2	1	2	1	2	3	3	2	2	1	3	7	6	6	6	5	2	6	5	4	5	5	5	5	4	5	5	5	5	5	4	4	6	5	5	4	5	6	6	6	6	6	4	无	6.25	4.5	4.75	5.16667	4.75
247	2	1	2	1	4	1	1	1	2	1	4	4	1	5	5	3	3	4	4	5	5	4	5	5	5	4	5	7	5	4	4	1	5	3	4	5	5	7	7	5	4	5	5	无	3.75	3.5	4.75	4	4.75
248	2	1	2	1	2	2	2	3	2	2	1	6	3	5	4	3	4	4	3	3	4	4	5	5	4	4	5	5	4	3	3	3	4	3	4	5	7	6	6	5	4	4	3	无	4.5	3.5	4	4	4.5
249	1	1	3	1	2	2	2	5	2	1	1	7	7	7	7	7	7	7	7	7	7	7	7	7	7	7	7	7	7	7	7	7	7	7	7	7	7	7	7	7	7	7	7	无	7	7	7	7	7
250	2	3	5	1	2	2	2	1	1	1	1	7	6	6	6	6	6	6	6	5	5	5	5	5	5	5	5	5	5	5	5	6	6	6	6	6	6	6	6	6	6	6	6	可以教点干货 如何找到一份好工作这样的	6.25	6	5	5.75	5
251	2	1	5	1	2	1	1	1	2	1	4	5	2	5	4	4	4	4	4	4	4	4	4	4	4	4	4	4	4	4	4	2	4	4	4	4	4	4	4	4	4	4	4	无	4	4	4	4	4
252	2	1	3	1	3	2	2	2	1	1	1	7	7	7	7	7	7	7	7	7	7	7	7	7	7	7	7	7	7	7	7	7	7	7	7	7	7	7	7	7	7	7	7	无	7	7	7	7	7
253	2	1	2	1	3	1	1	4	2	1	1	5	5	6	6	4	3	5	3	5	4	6	5	5	6	5	5	4	4	5	3	2	5	5	5	5	5	5	7	6	5	6	5	希望实践环节优化下	5.5	3.75	5	4.75	5.25
254	2	1	2	1	2	4	1	1	1	1	2	6	6	6	6	5	5	5	5	5	5	5	5	5	5	5	5	5	5	5	5	5	5	5	5	5	5	5	5	5	5	5	5	还不太能掌握知识	6	5	5	5.33333	5
255	2	1	5	1	4	2	2	5	2	1	1	4	4	4	5	3	4	5	4	4	4	4	4	4	4	4	4	4	4	4	4	4	4	4	4	4	4	4	4	4	4	4	4	无	4.25	4	4	4.08333	4
256	2	1	3	1	2	3	3	4	2	1	1	6	6	6	6	7	7	7	7	7	7	7	7	6	6	6	6	6	6	6	6	6	6	6	6	6	6	6	6	6	6	6	6	无	6	7	7	6.66667	6
257	2	1	5	1	2	2	1	2	1	1	1	4	4	5	5	5	4	4	4	4	4	4	4	4	4	4	6	5	5	5	5	4	4	4	4	4	4	4	4	4	4	4	4	无	4.5	4.25	4	4.25	4.5
258	1	1	3	2	2	2	2	2	1	1	1	7	7	7	7	7	7	7	7	7	7	7	7	7	7	7	7	7	7	7	7	7	7	7	7	7	7	7	7	7	7	7	7	无	7	7	7	7	7
259	2	1	3	1	3	2	1	4	2	2	1	4	4	4	4	4	4	4	4	4	4	4	4	4	4	4	4	4	4	4	4	4	4	4	4	4	4	4	4	4	4	4	4	无	4	4	4	4	4
260	2	3	2	1	4	1	1	3	2	2	4	5	3	6	4	3	4	5	5	5	3	5	6	4	4	4	4	6	3	5	4	3	5	4	5	5	5	5	5	5	4	5	4	无	4.5	4.25	4.75	4.5	4
261	2	1	3	1	4	1	1	3	2	1	4	6	6	5	6	6	5	4	4	4	4	4	4	4	4	4	4	4	4	4	4	4	4	4	4	4	4	4	4	4	5	4	4	无	5.75	4.75	4	4.83333	4
262	2	1	3	1	4	2	1	3	2	2	4	3	3	3	3	3	3	3	3	3	3	3	3	3	3	4	4	4	4	4	4	4	4	4	4	4	4	4	4	4	4	4	4	无	3	3	3	3	3.5
263	1	1	2	1	4	1	1	4	1	1	1	6	6	6	6	6	6	6	6	6	6	6	6	4	4	4	4	4	4	4	4	4	4	4	4	6	6	6	6	6	6	6	6	无	6	6	6	6	4
264	2	1	2	1	2	2	1	4	1	1	4	4	4	5	6	5	5	6	5	4	4	5	6	5	5	5	5	6	4	4	6	3	6	3	3	5	7	6	6	4	5	5	5	无	4.75	5.25	4.75	4.91667	5
265	1	4	1	1	4	4	3	3	1	2	1	2	3	6	2	5	5	5	4	5	5	5	5	5	3	5	5	5	4	5	5	4	4	4	5	7	5	5	7	6	6	6	6	无	3.25	4.75	5	4.33333	4.5
266	2	1	1	1	4	1	1	3	1	1	1	4	4	4	4	4	4	4	4	4	4	4	4	4	4	4	4	4	4	4	4	4	4	4	4	4	4	4	4	4	4	4	4	无	4	4	4	4	4
267	2	1	1	1	4	1	1	1	2	1	1	5	5	5	5	4	3	4	4	4	4	4	4	4	4	4	4	4	4	4	4	4	4	4	4	4	4	4	4	4	4	4	4	无	5	3.75	4	4.25	4
268	1	1	3	1	4	1	1	5	2	1	1	6	6	6	6	5	5	5	5	5	5	5	5	5	5	5	5	5	6	5	5	6	6	6	5	2	2	2	2	5	5	5	5	无	6	5	5	5.33333	5
269	2	1	1	1	2	2	2	2	2	2	2	4	4	4	4	4	4	4	4	4	4	4	4	4	4	4	4	4	4	4	4	4	4	4	4	4	4	4	4	4	4	4	4	无	4	4	4	4	4
270	2	1	3	1	4	1	1	1	2	1	1	7	7	7	7	7	7	7	7	7	7	6	5	5	4	5	5	5	6	6	5	5	5	6	7	6	6	6	6	6	6	5	6	无	7	7	6.25	6.75	4.75
271	1	1	1	1	4	2	1	4	2	1	1	4	4	4	4	4	4	4	4	4	4	4	4	4	4	4	4	4	4	4	4	4	4	4	4	4	4	4	4	4	4	4	4	有	4	4	4	4	4
272	2	1	2	1	4	1	1	3	2	1	4	2	2	5	3	2	2	4	3	2	5	3	6	5	4	3	2	5	5	5	1	2	2	2	2	5	5	5	5	5	3	2	2	无	3	2.75	4	3.25	3.5
273	2	1	1	1	3	1	1	2	2	1	1	6	2	2	4	3	3	3	3	3	4	4	3	5	4	4	4	4	4	4	4	4	4	4	4	4	4	4	4	4	4	4	4	无	3.5	3	3.5	3.33333	4.25
274	1	1	1	1	4	3	3	3	2	2	4	4	3	3	3	3	3	3	3	3	3	3	3	3	3	3	3	3	3	3	3	3	3	3	3	3	3	3	3	3	3	3	3	无	3.25	3	3	3.08333	3
275	1	1	1	1	1	4	4	1	1	1	3	7	7	7	7	7	7	7	7	7	7	7	7	7	7	7	7	7	7	7	7	7	7	7	7	7	7	7	7	7	7	7	7	无	7	7	7	7	7
276	2	1	3	1	4	1	1	4	2	2	1	5	5	5	5	5	5	6	5	4	4	5	3	6	6	6	5	6	2	2	3	1	3	2	5	3	5	3	6	5	4	5	3	多找点案例来调动积极性	5	5.25	4	4.75	5.75
277	1	1	1	2	1	3	2	4	2	3	4	7	7	7	7	7	7	7	7	7	7	7	7	7	7	7	7	7	7	7	7	7	7	7	7	7	7	7	7	7	7	7	7	无	7	7	7	7	7
278	2	1	3	1	4	1	1	2	1	1	1	6	6	6	6	6	6	6	6	6	6	6	6	6	6	6	6	6	6	6	6	6	6	6	6	6	6	6	6	6	6	6	6	无	6	6	6	6	6
279	1	1	1	1	1	4	4	1	1	1	1	7	7	7	7	7	7	7	7	7	7	7	7	7	7	7	7	7	7	7	7	7	7	7	7	7	7	7	7	7	7	7	7	你的快递包容超级杯吹牛逼都快成农非居然比雪纳瑞*佛osbkdjrnfibdkebxkksbdjfmbskdnjdjssyidicjf嘟嘟嘟地插忒烦了kcu复读覅v开车车检查u肚饿高配版开粗到月底公车上有点哦复试已付款v看粗度诶顾客继续阅读付款v宽度都会觉得羊肉馆杰西卡度精度低覅猝死公v监督岗看场地郭凯赌狗	7	7	7	7	7
280	1	1	1	1	4	1	1	5	2	3	4	1	1	3	3	3	3	3	3	3	3	3	3	3	3	3	3	3	3	3	3	5	5	5	5	3	4	4	4	5	4	4	4	无	2	3	3	2.66667	3
281	1	2	1	1	2	1	1	3	2	2	1	4	4	4	4	4	4	4	4	5	4	4	4	4	4	4	4	4	4	4	4	4	4	4	4	4	4	4	4	4	4	4	4	无	4	4	4.25	4.08333	4
282	2	1	2	1	2	1	1	1	1	1	1	6	6	6	3	5	3	5	3	5	2	5	2	2	5	2	5	2	5	2	5	2	5	3	5	2	3	5	2	2	5	5	2	无	5.25	4	3.5	4.25	3.5
283	2	1	2	1	4	1	1	3	2	3	1	4	3	4	4	4	4	4	4	4	4	4	4	4	4	4	4	4	4	4	4	4	4	4	4	4	4	4	4	4	4	4	4	无	3.75	4	4	3.91667	4
284	2	1	2	1	3	2	2	1	1	2	1	6	6	6	6	6	6	6	6	6	6	6	6	6	6	6	6	6	6	6	6	6	6	6	6	6	6	6	6	6	6	6	6	很好	6	6	6	6	6
285	2	1	2	1	4	1	1	1	2	1	3	7	7	7	7	7	7	7	7	7	7	7	7	7	7	7	7	7	7	7	7	7	7	7	7	7	7	7	7	7	7	7	7	无	7	7	7	7	7
286	2	2	1	1	4	1	1	1	1	2	1	5	5	5	5	5	5	5	5	5	5	5	5	5	5	5	5	5	5	5	5	5	5	5	5	5	5	5	5	5	5	5	5	无	5	5	5	5	5
287	2	1	2	1	2	2	2	2	1	1	4	7	7	7	7	7	7	7	7	7	7	7	7	4	4	4	4	4	5	5	3	5	4	3	5	5	4	4	5	5	3	5	5	无	7	7	7	7	4
288	2	1	5	1	4	1	1	2	2	2	1	5	5	5	5	5	5	5	5	5	5	5	5	5	5	5	5	5	5	5	5	5	5	5	5	5	5	5	5	5	5	5	5	有	5	5	5	5	5
289	1	1	2	1	4	2	1	4	2	2	1	4	4	5	5	5	5	4	4	5	5	5	4	5	4	5	4	5	4	4	4	5	5	5	5	5	5	5	5	5	5	3	5	无	4.5	4.5	4.75	4.58333	4.5
290	2	3	3	1	2	2	2	2	2	2	2	6	6	6	6	5	6	5	6	6	6	5	6	5	5	5	5	5	6	5	5	5	5	5	4	4	5	5	4	4	5	5	5	无	6	5.5	5.75	5.75	5
291	2	1	2	1	4	1	1	1	1	1	1	7	7	7	7	5	7	7	7	6	6	7	7	7	7	5	6	6	7	7	7	7	7	7	7	7	7	7	6	6	6	7	7	无	7	6.5	6.5	6.66667	6.25
292	2	2	2	2	2	4	2	2	2	2	2	7	7	7	7	7	7	7	7	7	7	7	7	7	7	7	7	7	7	7	7	7	7	7	7	7	7	7	7	7	7	7	7	无	7	7	7	7	7
293	1	1	2	1	2	1	2	4	1	2	1	1	5	4	1	4	1	1	5	1	5	5	4	1	1	5	5	1	5	5	5	5	1	5	1	1	5	5	1	1	1	1	1	无	2.75	2.75	3.75	3.08333	3
294	1	2	5	2	2	2	1	5	2	2	4	5	5	4	5	4	5	4	5	4	4	5	4	4	5	4	5	4	3	5	4	4	5	3	5	3	5	4	3	3	4	3	4	无	4.75	4.5	4.25	4.5	4.5
295	1	1	2	1	4	1	1	3	2	1	1	7	7	7	7	7	7	7	7	7	7	7	7	7	7	7	7	7	7	7	7	7	7	7	7	7	7	7	7	7	7	7	7	无	7	7	7	7	7
296	2	1	3	1	2	2	2	3	2	1	1	7	5	4	6	6	6	5	7	7	7	5	6	7	6	5	7	7	6	6	7	7	6	5	7	6	7	6	7	7	5	6	6	无	5.5	6	6.25	5.91667	6.25
297	2	3	3	1	4	1	3	4	1	2	3	4	4	4	4	4	4	4	4	4	4	4	4	4	4	4	4	4	4	4	4	4	4	4	4	4	4	4	4	4	4	4	4	无	4	4	4	4	4
298	2	1	2	1	2	2	3	3	2	1	1	5	5	5	5	5	5	5	5	5	5	5	5	5	5	5	5	5	5	5	5	5	5	5	5	5	5	5	5	5	5	5	5	无	5	5	5	5	5
299	1	1	1	1	4	1	1	2	2	3	4	2	2	2	2	2	2	2	2	2	2	2	2	2	2	2	2	3	3	3	3	3	3	3	3	3	3	4	4	4	4	4	4	无	2	2	2	2	2
300	1	1	5	1	4	1	1	4	2	2	1	1	1	1	1	1	1	3	1	1	1	1	1	3	5	3	4	3	4	3	4	3	4	3	2	1	3	1	4	1	6	1	5	无	1	1.5	1	1.16667	3.75
301	2	1	3	1	2	1	1	1	1	1	1	4	4	3	3	3	3	3	4	3	3	3	3	3	3	3	3	3	3	3	3	3	4	4	4	4	4	4	4	4	4	4	4	无	3.5	3.25	3	3.25	3
303	1	1	2	1	4	2	1	5	2	3	4	1	1	1	1	1	1	1	1	1	1	1	1	1	1	1	1	1	1	1	1	1	1	1	1	1	1	1	1	1	1	1	1	无	1	1	1	1	1
304	2	1	2	1	2	2	2	3	1	1	1	6	6	6	6	5	5	5	5	5	5	5	5	5	5	5	5	5	5	5	5	5	5	5	5	5	5	5	5	5	5	5	5	无	6	5	5	5.33333	5
305	2	1	2	1	4	1	1	2	1	1	4	3	5	5	4	5	4	4	5	5	5	3	5	5	3	5	3	5	3	4	5	4	5	6	5	4	5	5	4	5	4	5	5	无	4.25	4.5	4.5	4.41667	4
306	2	3	3	1	4	1	1	2	1	1	3	4	4	4	4	4	4	4	4	4	4	4	4	4	4	4	4	4	4	4	4	4	4	4	4	4	4	4	4	4	4	4	4	无	4	4	4	4	4
307	2	3	3	1	2	1	2	1	2	1	3	7	7	7	7	7	7	7	7	7	7	7	7	7	7	7	7	7	7	7	7	7	7	7	7	7	7	7	7	7	7	7	7	无	7	7	7	7	7
308	2	3	3	1	2	3	1	5	1	2	3	3	4	3	3	3	3	3	3	3	3	3	3	3	3	3	2	5	4	4	2	1	2	3	3	4	3	4	3	2	3	3	3	无	3.25	3	3	3.08333	2.75
309	1	1	3	1	4	2	1	5	2	2	3	5	5	5	5	5	5	5	5	5	5	5	5	5	5	5	5	5	5	5	5	5	5	5	5	5	5	5	5	5	5	5	5	无	5	5	5	5	5
310	2	3	3	1	2	3	3	1	1	2	1	5	5	5	5	5	4	5	5	5	4	5	5	5	4	5	5	5	4	5	5	5	4	5	5	5	4	5	5	6	4	5	5	好	5	4.75	4.75	4.83333	4.75
311	2	1	5	2	2	2	3	1	1	1	4	7	7	7	7	7	7	7	7	7	7	7	7	7	7	7	7	7	7	7	7	7	7	7	7	7	7	7	7	7	7	7	7	无	7	7	7	7	7
312	1	2	3	1	4	1	1	5	2	2	1	6	4	6	7	4	6	5	5	5	5	5	4	6	5	4	4	4	5	4	4	5	4	4	5	5	4	5	4	4	5	4	4	无	5.75	5	4.75	5.16667	4.75
313	2	1	2	1	3	2	2	1	2	1	1	7	7	7	7	7	7	7	7	7	7	7	7	7	7	7	7	7	7	7	7	7	7	7	7	7	7	7	7	7	7	7	7	无	7	7	7	7	7
314	1	1	3	1	2	2	2	5	2	3	4	4	4	4	4	4	4	4	4	4	4	4	4	4	4	4	4	4	4	4	4	4	4	4	4	4	4	4	4	4	4	4	4	无	4	4	4	4	4
315	2	3	3	1	4	1	1	5	2	3	4	7	7	7	7	7	7	7	7	7	7	7	7	7	7	7	7	7	7	7	7	1	7	1	1	7	7	7	7	7	7	7	7	无	7	7	7	7	7
316	2	1	2	1	4	2	1	1	2	1	1	4	3	5	5	5	4	4	5	5	4	4	4	4	4	4	4	4	4	4	4	4	4	4	4	4	4	4	4	4	4	4	4	无	4.25	4.5	4.25	4.33333	4
317	1	1	5	1	4	1	1	5	2	3	4	1	1	3	1	3	3	3	3	1	3	3	3	3	3	3	3	3	1	2	3	3	3	1	1	3	3	3	3	3	3	3	3	无	1.5	3	2.5	2.33333	3
318	1	1	2	1	2	3	2	3	1	2	2	7	7	7	7	7	7	7	7	7	7	7	7	7	7	7	7	7	7	7	7	7	7	7	7	7	7	7	7	7	7	7	7	无	7	7	7	7	7
319	2	1	2	1	2	2	2	5	2	1	2	5	5	5	5	5	5	5	5	4	5	5	5	5	5	5	5	6	5	5	5	5	5	5	5	5	5	5	5	5	5	5	5	无	5	5	4.75	4.91667	5
320	2	1	2	1	3	1	1	5	2	2	4	4	2	4	4	4	3	3	3	3	3	3	3	3	3	3	3	3	3	3	3	3	3	3	3	3	3	3	3	3	3	3	3	无	3.5	3.25	3	3.25	3
321	1	1	2	1	2	2	2	4	2	1	3	6	6	7	7	7	7	6	7	7	7	7	7	7	7	6	7	7	7	6	7	7	6	7	7	7	7	7	7	7	7	6	7	增加有关职业规划的课程	6.5	6.75	7	6.75	6.75
322	2	1	2	1	3	2	2	4	2	2	1	5	5	5	5	5	5	5	5	5	5	5	5	5	5	5	5	5	5	5	5	5	5	5	5	5	5	5	5	5	5	5	5	无	5	5	5	5	5
323	1	3	3	1	2	3	1	3	2	2	1	6	6	6	6	6	6	6	6	6	6	6	6	6	6	6	6	6	6	6	6	6	6	6	6	6	6	6	6	6	6	6	6	无	6	6	6	6	6
324	1	1	3	1	2	3	3	1	1	1	4	7	7	7	7	7	7	7	7	7	7	7	7	7	7	7	7	7	7	7	7	7	7	7	7	7	7	7	7	7	7	7	7	无	7	7	7	7	7
325	2	3	3	1	4	2	2	1	1	1	3	5	5	5	5	5	5	5	5	5	5	5	5	5	5	5	5	5	5	5	5	5	5	5	5	5	5	5	5	5	5	5	5	没用，少上课	5	5	5	5	5
326	1	1	1	1	1	1	2	3	1	1	4	7	7	7	7	7	7	7	7	7	7	7	7	7	7	7	7	7	7	7	7	7	7	7	7	7	7	7	7	7	7	7	7	无	7	7	7	7	7
327	1	1	3	1	4	1	1	1	1	1	1	3	3	3	3	3	3	3	3	3	3	3	3	3	3	3	3	3	3	3	3	3	3	3	3	3	3	3	3	3	3	3	3	为我提供一些实习经历	3	3	3	3	3
328	1	1	2	1	2	2	2	1	1	1	1	7	7	7	7	7	7	7	7	7	7	7	7	7	7	7	7	7	7	7	7	7	7	7	7	7	7	7	7	7	7	7	7	无	7	7	7	7	7
329	1	1	3	1	2	3	3	2	1	2	4	6	2	7	7	7	7	7	7	7	6	6	6	7	1	4	4	6	6	5	6	2	6	5	5	6	7	7	7	4	6	6	5	无	5.5	7	6.25	6.25	4
330	2	3	3	1	4	1	1	2	1	3	3	4	4	4	4	4	4	4	4	4	4	4	4	4	4	4	4	4	4	4	4	4	4	4	4	4	4	4	4	4	4	4	4	无	4	4	4	4	4
331	2	1	3	1	4	2	1	2	2	2	2	4	4	4	4	4	4	4	4	4	4	4	4	4	4	4	4	4	4	4	4	4	4	4	4	4	4	4	4	4	4	4	4	无	4	4	4	4	4
332	1	1	2	1	2	2	2	5	2	2	1	4	4	4	4	4	4	4	4	4	4	4	4	4	4	4	4	4	4	4	4	4	4	4	4	4	4	4	4	4	4	4	4	无	4	4	4	4	4
333	1	1	2	1	4	1	1	1	1	1	3	7	7	7	7	6	7	7	6	7	7	4	2	7	7	6	7	7	3	3	3	5	4	6	6	2	2	3	4	5	5	6	7	无	7	6.5	5	6.16667	6.75
334	1	1	2	1	4	3	3	5	2	3	1	7	7	7	7	7	7	7	7	7	7	7	7	7	7	7	7	7	7	7	7	7	7	7	7	7	7	7	7	7	7	7	7	没有	7	7	7	7	7
335	1	1	5	1	3	2	1	5	2	2	3	4	2	7	7	1	1	1	4	1	6	5	4	2	5	5	2	5	5	5	2	2	5	2	2	3	5	2	4	1	1	1	1	无	5	1.75	4	3.58333	3.5
336	2	3	3	1	4	1	1	3	2	1	3	4	4	4	4	4	4	4	4	6	6	6	6	4	4	4	4	4	4	4	4	4	4	4	4	4	4	4	4	4	4	4	4	无	4	4	6	4.66667	4
337	2	1	3	1	4	1	1	1	2	2	1	4	5	4	4	6	5	5	4	4	4	3	5	5	5	4	3	5	4	5	4	5	5	5	5	6	7	4	6	7	5	4	3	更加丰富点	4.25	5	4	4.41667	4.25
338	2	1	2	1	4	3	1	4	2	1	3	4	4	4	4	4	4	4	4	4	4	4	4	4	4	4	4	4	4	5	4	4	4	4	4	4	4	4	4	4	4	4	4	无	4	4	4	4	4
339	2	3	3	1	4	1	2	4	1	2	2	4	4	4	4	4	4	4	4	4	4	4	4	4	4	4	4	4	4	4	4	4	4	4	4	4	4	4	4	4	4	4	4	无	4	4	4	4	4
340	2	1	3	1	4	1	1	5	1	1	3	1	1	3	3	3	3	3	3	3	3	3	3	3	3	3	3	3	3	3	3	3	3	3	3	3	3	3	3	3	3	3	3	。	2	3	3	2.66667	3
341	1	1	3	1	2	1	1	3	2	1	3	7	7	7	7	7	7	7	7	7	7	7	7	7	7	7	7	7	7	7	7	7	7	7	7	7	7	7	7	7	7	7	7	无	7	7	7	7	7
342	2	1	2	1	2	2	2	2	1	1	3	4	4	4	4	4	4	4	4	4	4	4	4	4	4	4	4	4	4	4	4	4	4	4	4	4	4	4	4	4	4	4	4	无	4	4	4	4	4
343	1	1	5	1	3	2	2	2	1	2	1	6	5	5	5	5	6	5	4	5	6	5	5	5	5	6	7	6	6	6	5	5	3	5	4	5	5	6	5	5	6	5	5	没有	5.25	5	5.25	5.16667	5.75
344	2	2	2	1	2	2	3	5	2	2	1	4	4	4	4	4	4	4	4	4	4	4	4	4	4	4	4	4	4	4	4	4	4	4	4	4	4	4	4	4	4	4	4	无	4	4	4	4	4
345	2	1	3	1	4	1	1	3	2	1	4	5	6	5	6	6	7	5	7	6	6	6	6	5	6	6	6	7	7	7	6	6	6	6	6	5	6	5	6	6	6	7	5	希望可以有系统的教程	5.5	6.25	6	5.91667	5.75
346	1	1	2	1	2	3	2	4	2	3	4	1	1	1	1	1	1	1	1	1	1	1	1	1	1	1	1	1	1	1	1	1	1	1	1	1	1	1	1	1	1	1	1	无	1	1	1	1	1
347	2	1	3	1	4	1	1	1	2	1	4	7	1	7	7	7	7	7	7	7	7	7	7	7	7	7	7	7	7	7	7	3	7	4	4	3	2	2	6	5	5	5	5	无	5.5	7	7	6.5	7
348	1	1	3	2	2	2	2	4	2	2	4	6	6	6	6	6	6	6	6	6	6	6	6	6	6	6	6	6	6	6	6	6	6	6	6	6	6	6	6	6	6	6	6	无	6	6	6	6	6
349	2	1	2	1	2	2	1	2	1	1	1	7	7	7	7	7	7	7	7	7	7	7	7	7	7	7	7	7	7	7	7	7	7	7	7	7	7	7	7	7	7	7	7	无	7	7	7	7	7
350	2	3	3	1	4	1	1	2	2	1	3	5	5	5	5	3	5	5	5	5	5	5	5	5	5	5	5	5	5	5	5	5	5	5	5	5	5	5	5	5	5	5	4	大多数没有实质性帮助	5	4.5	5	4.83333	5
351	2	1	2	1	2	2	2	3	1	1	1	4	4	4	4	4	4	4	4	4	4	4	4	4	4	4	4	4	4	4	4	4	4	4	4	4	4	4	4	4	4	4	4	无	4	4	4	4	4
352	2	1	2	1	2	1	3	4	2	1	4	4	2	2	7	5	4	3	4	7	3	4	3	4	6	4	5	3	7	2	1	1	1	1	1	1	1	1	1	1	1	1	1	无	3.75	4	4.25	4	4.75
353	2	1	3	1	4	2	2	5	2	2	4	3	3	4	6	4	3	3	3	3	3	3	3	3	3	5	3	5	3	5	3	3	5	4	3	4	2	5	5	4	3	5	2	无	4	3.25	3	3.41667	3.5
354	2	1	3	1	1	2	2	1	2	1	4	3	3	3	3	3	3	3	3	3	3	3	3	3	3	3	3	3	3	3	3	3	3	3	3	3	3	3	3	5	5	5	5	无	3	3	3	3	3
355	2	1	3	1	3	1	1	2	2	2	2	4	3	4	5	4	4	5	3	3	4	5	4	5	3	4	5	4	4	3	2	2	4	3	4	5	5	4	6	4	2	3	3	无	4	4	4	4	4.25
356	2	1	2	1	2	2	2	4	2	2	1	7	7	7	7	7	7	7	7	7	7	7	7	7	7	7	7	7	7	7	7	7	7	7	7	7	7	7	7	7	7	7	7	无	7	7	7	7	7
357	2	1	5	1	1	4	4	3	1	2	4	7	4	5	5	4	5	6	3	4	4	6	5	6	1	7	7	4	4	4	3	3	4	5	2	5	3	5	5	6	3	5	5	无	5.25	4.5	4.75	4.83333	5.25
358	1	1	2	1	4	2	2	4	2	1	4	5	4	6	5	6	6	5	6	5	6	5	6	5	7	5	6	5	6	6	5	5	6	6	6	6	6	6	6	6	6	6	6	无	5	5.75	5.5	5.41667	5.75
359	2	1	5	1	2	2	2	2	1	2	1	5	5	5	5	5	5	5	5	5	5	5	5	5	5	5	5	5	5	5	5	5	5	5	5	5	5	5	5	5	5	5	5	wu	5	5	5	5	5
360	1	1	2	1	2	3	3	2	1	3	2	4	4	4	4	4	4	4	4	4	4	4	4	4	4	4	4	4	4	4	4	4	4	4	4	4	4	4	4	4	4	4	4	无	4	4	4	4	4
361	1	1	2	1	1	1	1	5	2	2	4	5	5	5	5	4	4	4	4	4	4	4	4	4	4	4	4	3	4	3	4	5	5	5	5	5	2	2	5	5	3	5	3	无	5	4	4	4.33333	4
362	2	1	5	1	4	1	1	2	1	1	1	6	6	5	6	6	6	6	6	6	6	6	6	6	6	6	6	6	6	6	6	6	6	6	6	6	5	6	6	6	6	6	6	无	5.75	6	6	5.91667	6
363	2	1	3	1	3	1	1	2	1	1	4	5	5	5	5	5	5	5	5	5	5	5	5	5	5	5	5	5	4	4	5	4	5	5	6	5	4	5	5	5	5	5	5	应该在大三就让我实习	5	5	5	5	5
364	2	1	2	1	4	2	2	1	1	2	4	6	5	5	7	7	6	7	6	6	5	5	5	6	5	5	5	6	5	5	5	5	6	4	5	5	5	5	5	5	5	5	5	无	5.75	6.5	5.25	5.83333	5.25
365	1	1	5	1	4	1	1	1	2	3	4	7	7	7	7	7	7	7	7	7	7	7	7	7	7	7	7	7	7	7	7	7	7	7	7	7	7	7	7	7	7	7	7	无	7	7	7	7	7
366	1	1	3	1	4	1	2	3	2	3	4	7	7	7	7	7	7	7	7	7	7	7	7	7	7	7	7	7	7	7	7	7	7	7	7	7	7	7	7	7	7	7	7	无	7	7	7	7	7
367	2	1	3	2	2	2	3	2	2	1	1	6	6	6	5	5	5	5	3	5	5	5	5	5	5	5	5	4	5	5	5	4	4	5	5	5	5	5	5	5	5	5	5	无	5.75	4.5	5	5.08333	5
368	2	1	3	2	2	2	3	4	2	3	1	4	4	4	4	4	4	4	4	4	4	4	4	4	4	5	5	4	6	5	5	5	6	6	5	5	5	5	4	4	6	6	6	无	4	4	4	4	4.5
369	2	1	3	1	3	1	1	3	2	1	2	7	7	7	7	7	7	7	7	7	7	7	7	7	7	7	7	7	7	7	7	7	7	7	7	7	7	7	7	7	7	7	7	无	7	7	7	7	7
370	1	1	1	1	3	2	1	1	1	1	1	5	5	5	5	5	5	5	5	5	5	5	5	5	5	5	5	5	5	5	5	5	5	5	5	5	5	6	6	6	6	6	6	无	5	5	5	5	5
371	2	1	1	1	4	1	1	2	1	1	1	5	3	4	3	3	2	3	3	4	3	4	3	4	4	4	4	4	4	4	3	3	4	4	4	3	3	3	3	3	3	3	3	无	3.75	2.75	3.5	3.33333	4
372	2	1	5	1	4	1	1	4	2	3	1	3	4	2	4	2	4	4	3	3	5	3	3	3	5	3	3	3	4	3	3	4	4	4	3	3	4	4	3	4	3	4	3	无	3.25	3.25	3.5	3.33333	3.5
373	2	1	1	1	4	3	3	5	2	2	4	7	5	3	4	5	3	5	3	5	3	3	5	5	3	3	5	5	3	5	5	3	3	3	5	6	3	5	5	5	2	5	3	无	4.75	4	4	4.25	4
374	2	1	1	1	4	1	1	3	2	3	2	4	4	2	4	2	3	3	3	3	3	3	3	3	4	4	3	4	3	3	4	4	3	5	3	5	4	3	3	4	3	4	4	没有	3.5	2.75	3	3.08333	3.5
375	1	1	5	1	4	1	1	3	2	1	4	2	2	2	4	3	3	3	3	3	3	3	3	3	4	3	3	5	3	3	4	3	3	3	3	4	3	3	5	3	3	4	3	无	2.5	3	3	2.83333	3.25
376	1	1	3	1	2	2	2	2	1	1	4	3	4	3	4	3	3	3	3	3	3	3	3	3	3	3	3	6	3	4	4	4	3	3	3	3	3	3	3	3	3	3	3	无	3.5	3	3	3.16667	3
377	1	2	3	1	4	2	1	4	2	1	4	7	4	7	7	4	4	4	6	6	5	6	5	5	5	5	5	7	6	7	6	4	5	5	4	6	6	7	7	5	5	6	5	无	6.25	4.5	5.5	5.41667	5
378	2	2	5	1	3	1	1	2	2	3	1	3	3	3	3	3	3	3	3	3	3	3	3	3	3	3	3	3	3	3	3	3	3	3	3	3	3	3	3	3	3	3	3	无	3	3	3	3	3
379	2	1	2	1	4	1	1	1	2	2	1	1	1	3	2	3	3	3	3	3	3	3	3	3	3	3	3	3	3	3	3	3	3	3	3	3	3	3	3	3	3	3	3	无	1.75	3	3	2.58333	3
380	2	1	2	1	3	1	1	3	2	2	4	4	4	4	4	4	4	4	4	4	4	4	4	4	4	4	4	4	4	4	4	4	4	4	4	4	4	4	4	4	4	4	4	1	4	4	4	4	4
381	2	1	3	1	2	2	1	3	2	1	1	6	6	6	6	6	6	6	6	6	6	6	6	6	6	6	6	6	6	6	6	6	6	6	6	6	6	6	6	6	6	6	6	无	6	6	6	6	6
382	2	1	3	1	4	2	2	4	2	1	1	3	3	3	3	3	3	3	3	3	3	3	3	3	3	3	3	3	3	3	3	3	3	3	3	3	3	3	3	3	3	3	3	无	3	3	3	3	3
383	2	1	2	1	2	1	2	3	1	1	1	4	4	4	4	4	4	4	4	4	4	4	4	4	4	4	4	4	4	4	4	4	4	4	4	4	4	4	4	4	4	4	4	无	4	4	4	4	4
384	2	1	2	1	4	1	1	2	2	3	4	3	3	3	3	4	3	5	4	3	6	5	5	5	5	4	6	4	5	4	5	4	5	5	4	5	5	5	6	4	4	4	5	无	3	4	4.75	3.91667	5
385	1	1	1	1	2	3	2	4	1	1	1	7	1	5	4	2	2	4	4	4	4	4	4	4	4	4	4	4	4	4	4	4	4	4	4	4	4	4	4	4	4	4	4	无	4.25	3	4	3.75	4
386	2	1	2	1	4	1	1	1	2	1	1	5	6	7	5	5	6	6	7	5	6	5	6	5	6	5	6	5	6	5	6	5	6	5	6	5	6	5	5	5	6	5	6	无	5.75	6	5.5	5.75	5.5
387	2	1	3	1	2	1	1	1	1	1	1	7	4	5	6	6	6	5	6	4	5	6	6	4	5	4	6	7	6	6	7	1	2	2	6	6	7	7	7	6	6	6	7	希望提供一些真实具体的就业案例	5.5	5.75	5.25	5.5	4.75
388	2	1	5	1	1	2	2	2	1	1	4	5	5	6	5	5	5	5	5	5	5	5	5	6	5	6	6	5	5	5	5	5	5	5	5	6	5	5	5	5	5	5	5	无	5.25	5	5	5.08333	5.75
389	2	1	3	1	2	3	4	2	2	2	2	4	5	5	5	5	5	5	5	4	4	4	4	5	4	4	5	5	5	5	5	3	6	6	5	6	5	5	5	3	3	3	3	无	4.75	5	4	4.58333	4.5
390	2	1	2	1	1	3	2	1	2	1	4	4	4	5	5	5	5	5	5	7	6	4	4	6	6	6	6	6	4	5	5	4	7	4	4	4	4	4	4	4	4	4	4	无	4.5	5	5.25	4.91667	6
391	2	1	3	1	4	2	2	1	2	1	4	3	3	3	3	3	3	3	3	3	3	3	3	3	3	3	3	3	3	3	3	3	3	3	3	3	3	3	3	3	3	3	3	好	3	3	3	3	3
392	2	1	3	1	4	1	1	3	2	2	1	5	3	4	5	4	3	4	5	5	4	4	5	5	6	4	5	5	3	5	4	3	4	5	5	5	4	4	6	5	5	5	5	暂无	4.25	4	4.5	4.25	5
393	1	1	5	1	1	4	4	2	2	1	3	7	7	7	7	7	7	7	7	7	7	7	7	7	7	7	7	7	7	7	7	7	7	7	7	7	7	7	7	7	7	7	7	无	7	7	7	7	7
394	2	1	5	1	3	1	2	1	2	2	2	3	3	3	3	4	3	3	3	4	4	5	5	5	4	3	3	4	3	3	3	3	3	3	3	3	3	3	3	3	3	3	4	无	3	3.25	4.5	3.58333	3.75
395	1	1	3	1	4	3	3	3	1	1	1	7	7	7	7	7	7	7	7	7	7	7	7	7	7	7	7	7	7	7	7	7	7	7	7	7	7	7	7	7	7	7	7	无	7	7	7	7	7
396	1	1	1	1	4	2	2	2	2	3	4	1	1	1	1	1	1	1	1	1	4	6	7	7	7	4	4	7	4	2	7	3	1	1	1	4	4	4	4	4	4	4	4	无	1	1	4.5	2.16667	5.5
397	1	1	2	1	1	2	3	5	2	1	1	3	2	3	3	3	3	3	3	3	3	3	3	3	3	3	3	3	3	4	3	3	3	3	3	3	3	3	4	3	3	3	3	无	2.75	3	3	2.91667	3
398	2	2	5	1	4	2	2	4	2	2	1	6	5	5	5	4	5	5	5	4	5	5	5	5	5	5	5	5	5	5	5	4	4	5	4	5	5	5	5	5	5	5	5	无	5.25	4.75	4.75	4.91667	5
399	1	1	5	1	2	3	3	5	1	3	1	3	3	3	3	3	3	3	3	3	3	3	3	3	3	3	3	3	3	3	3	3	3	3	3	3	3	3	3	3	3	3	3	无	3	3	3	3	3
400	2	1	5	1	4	1	1	3	2	1	1	4	2	2	3	3	3	3	3	2	3	3	3	3	3	3	3	3	3	3	3	2	2	2	2	3	2	2	3	2	2	3	3	无	2.75	3	2.75	2.83333	3
401	1	1	1	2	4	2	1	2	2	1	1	6	6	5	5	5	6	6	5	5	6	6	6	5	6	5	5	5	5	6	6	5	4	5	6	6	6	4	5	6	5	6	5	无	5.5	5.5	5.75	5.58333	5.25
402	2	1	3	1	4	1	1	2	2	1	4	7	4	7	4	7	7	7	7	7	7	6	7	6	6	7	6	6	6	7	6	6	7	6	6	7	7	6	7	7	6	6	7	没有	5.5	7	6.75	6.41667	6.25
403	2	1	3	1	4	1	1	4	2	2	4	4	4	4	4	4	4	3	4	4	4	3	4	4	3	3	4	4	4	3	4	4	4	3	4	4	3	4	4	4	4	3	4	没有建议	4	3.75	3.75	3.83333	3.5
404	2	1	2	1	4	2	2	3	1	1	1	7	3	7	7	4	4	4	7	7	7	7	7	7	7	7	7	7	7	7	7	7	7	7	7	7	7	7	7	7	7	7	7	无	6	4.75	7	5.91667	7
405	2	1	3	1	3	3	3	5	2	2	4	7	7	7	7	7	7	7	7	7	7	7	7	7	7	7	7	7	7	7	7	6	7	6	7	6	5	6	7	7	6	7	6	没有	7	7	7	7	7
406	2	1	3	1	4	1	1	3	2	1	1	5	5	5	5	5	4	6	4	6	5	6	5	6	5	4	6	6	6	7	6	5	4	5	5	6	6	5	5	6	5	6	4	无	5	4.75	5.5	5.08333	5.25
407	2	1	2	1	2	3	2	3	2	1	1	5	5	4	6	4	5	4	5	5	5	4	5	5	4	5	6	5	6	5	4	4	5	4	4	5	5	5	5	5	5	5	5	无	5	4.5	4.75	4.75	5
408	2	1	2	1	2	1	1	4	2	1	4	7	7	7	7	7	7	7	7	7	7	7	7	3	3	3	3	7	7	7	7	7	7	7	7	7	7	7	7	7	7	7	7	无	7	7	7	7	3
409	2	1	5	1	4	1	1	4	2	2	1	3	3	3	4	2	2	2	2	3	2	3	2	3	2	4	4	3	2	3	3	3	3	4	3	4	3	4	3	3	4	3	3	无	3.25	2	2.5	2.58333	3.25
410	2	1	3	1	2	1	1	2	2	1	4	4	2	5	5	4	4	4	5	5	5	5	5	4	4	4	4	5	4	5	4	3	5	5	5	6	6	6	6	6	4	6	4	无	4	4.25	5	4.41667	4
411	1	1	1	2	4	2	2	2	2	1	1	5	5	5	5	4	5	5	4	4	5	4	4	4	4	5	5	4	4	5	4	3	4	4	4	4	4	5	5	4	5	4	4	无	5	4.5	4.25	4.58333	4.5
412	1	1	2	1	4	2	1	4	2	1	1	7	4	5	5	7	5	6	4	7	5	4	5	7	6	5	5	5	6	7	7	7	7	7	7	6	7	6	6	7	7	6	7	早点取消晚自习	5.25	5.5	5.25	5.33333	5.75
413	1	1	2	1	3	1	1	4	2	1	1	6	6	6	6	6	6	6	6	6	6	6	6	6	6	6	6	6	6	6	6	6	6	6	6	6	6	6	6	6	6	6	6	无	6	6	6	6	6
414	2	1	2	1	2	2	1	2	1	1	3	7	5	6	6	6	6	6	6	6	6	6	6	6	6	6	6	6	6	6	6	6	6	6	6	6	6	6	6	6	6	6	6	无	6	6	6	6	6
415	2	1	1	2	4	1	1	3	2	3	4	1	2	1	1	1	1	1	1	1	1	1	1	1	1	1	1	1	1	1	1	1	1	1	1	1	1	1	1	1	1	1	1	毫无帮助，形式主义	1.25	1	1	1.08333	1
416	2	1	3	1	4	1	1	3	1	1	1	3	3	3	4	4	3	4	2	2	3	3	3	4	2	4	3	7	4	5	4	3	4	5	6	4	3	4	4	3	4	3	3	实习时间比较少。	3.25	3.25	2.75	3.08333	3.25
417	2	3	2	1	1	2	3	1	2	2	4	6	5	6	5	6	5	6	5	6	5	6	5	6	5	6	5	6	5	6	5	6	7	6	5	6	5	6	5	6	5	6	5	无	5.5	5.5	5.5	5.5	5.5
418	1	3	3	1	4	1	1	1	1	1	3	7	7	6	5	5	4	5	6	6	6	6	6	5	4	4	4	5	5	5	5	3	6	6	4	5	5	5	6	5	5	6	6	职业本科过于强调实践性，对于考研等规划强调性不足	6.25	5	6	5.75	4.25
419	2	1	3	1	4	1	1	1	2	2	1	7	7	7	7	7	7	7	7	7	7	7	7	7	7	7	7	7	7	7	7	7	7	7	7	7	7	7	7	7	7	7	7	无	7	7	7	7	7
420	2	1	2	1	2	3	3	1	1	2	2	5	5	5	5	4	4	4	4	4	4	4	4	4	4	4	4	4	4	4	4	4	4	4	4	4	4	4	4	4	4	4	4	无	5	4	4	4.33333	4
421	2	1	2	1	4	1	1	1	1	1	4	5	2	6	6	6	6	6	6	5	6	5	5	5	6	5	5	6	5	5	4	3	5	5	5	5	5	5	5	5	5	5	5	暂时没有	4.75	6	5.25	5.33333	5.25
422	2	1	5	1	4	1	1	1	2	1	4	5	5	5	5	5	5	5	5	5	5	5	5	5	5	5	5	5	5	5	5	5	5	5	5	5	5	5	5	5	5	5	5	无	5	5	5	5	5
423	2	1	2	1	2	2	2	1	1	1	1	4	4	4	4	4	4	4	4	4	4	4	4	4	4	4	4	4	4	4	4	4	4	4	4	4	4	4	4	4	4	4	4	无	4	4	4	4	4
424	1	1	5	1	2	1	1	5	2	1	1	7	7	7	7	7	7	7	7	7	7	7	7	7	7	7	7	7	7	7	7	7	7	7	7	7	7	7	7	7	7	7	7	无	7	7	7	7	7
425	2	1	2	1	3	1	1	3	2	1	1	5	4	5	5	5	3	3	3	3	3	3	5	3	3	4	4	5	3	4	5	3	3	3	3	4	4	3	4	4	4	4	4	无	4.75	3.5	3.5	3.91667	3.5
426	2	1	5	1	4	2	1	2	2	2	1	3	2	4	3	3	2	3	4	3	3	3	3	3	3	3	4	4	3	3	2	3	4	4	4	7	6	7	7	5	4	4	3	无	3	3	3	3	3.25
427	2	1	2	1	4	1	1	2	2	1	4	4	1	4	5	5	5	4	3	5	5	4	5	4	4	4	4	7	5	7	4	4	5	3	4	6	6	5	5	4	4	7	4	无	3.5	4.25	4.75	4.16667	4
428	2	2	2	1	3	2	2	4	2	1	1	4	3	5	5	6	5	4	4	3	5	4	5	5	4	5	4	4	5	6	4	5	4	5	6	6	5	5	6	6	5	6	5	无	4.25	4.75	4.25	4.41667	4.5
429	1	1	1	1	1	1	1	1	1	1	2	4	4	4	4	4	4	4	4	4	4	4	4	4	4	4	4	4	4	4	4	4	4	4	4	4	4	4	4	4	4	4	4	无	4	4	4	4	4
430	2	1	2	1	2	1	1	5	2	1	4	4	4	4	4	4	4	4	4	4	4	4	4	4	4	4	4	4	4	4	4	4	4	4	4	4	4	4	4	4	4	4	4	无	4	4	4	4	4
431	2	1	5	1	4	2	1	1	1	1	1	4	2	2	4	3	3	3	2	2	2	1	2	2	1	1	5	4	3	3	3	3	3	4	4	4	4	5	4	4	3	4	3	无	3	2.75	1.75	2.5	2.25
432	2	1	3	1	3	2	1	3	2	1	1	4	4	4	4	4	4	4	4	4	4	4	4	4	4	4	4	4	4	4	4	4	4	4	4	4	4	4	4	4	4	4	4	多实践，不想在教室。	4	4	4	4	4
433	2	3	2	1	4	1	1	1	2	2	1	6	4	6	6	6	6	6	6	6	6	6	6	6	6	6	6	6	6	6	6	6	6	6	6	6	6	6	6	6	6	6	6	。	5.5	6	6	5.83333	6
434	1	2	1	1	4	1	1	1	2	2	1	7	7	7	7	7	7	7	7	7	7	7	7	7	7	7	7	7	7	7	7	7	7	7	7	7	7	7	7	7	7	7	7	无	7	7	7	7	7
435	2	1	3	1	3	1	2	3	2	2	1	6	6	6	6	5	6	6	6	6	6	6	6	6	6	6	6	7	7	7	7	7	7	7	7	7	7	7	7	7	7	7	7	无	6	5.75	6	5.91667	6
436	2	3	2	1	3	1	1	1	2	1	1	5	5	5	5	5	5	5	5	5	5	5	5	5	5	5	5	5	5	5	5	6	5	5	5	6	5	5	5	6	6	5	5	无	5	5	5	5	5
437	2	1	1	1	2	1	1	3	2	1	4	7	7	7	7	7	7	7	7	7	7	7	7	7	7	7	7	7	7	7	7	7	7	7	7	7	7	7	7	7	4	6	7	无	7	7	7	7	7
438	2	1	3	1	3	1	1	1	1	1	2	5	5	6	6	6	6	6	6	6	6	6	6	6	5	5	6	6	5	5	4	5	5	6	6	6	6	5	5	6	5	6	6	无	5.5	6	6	5.83333	5.5
439	2	1	1	1	1	1	1	2	1	2	1	3	3	4	4	6	6	6	4	3	5	4	6	5	4	4	4	4	3	5	3	3	3	5	4	5	5	5	5	4	4	5	5	暂无	3.5	5.5	4.5	4.5	4.25
440	1	1	1	1	3	2	1	3	1	1	1	3	3	3	3	3	3	3	3	4	5	3	5	3	5	2	5	3	5	3	5	3	5	3	6	2	5	3	5	2	4	2	5	无	3	3	4.25	3.41667	3.75
441	2	1	3	1	2	3	2	1	1	1	2	5	5	5	5	5	5	5	5	5	5	5	5	5	4	4	5	5	5	6	6	5	6	5	6	5	5	5	6	6	6	6	6	无	5	5	5	5	4.5
442	1	2	2	1	2	1	2	2	2	1	1	7	7	7	7	7	7	7	7	7	7	7	7	7	7	7	7	7	7	7	7	7	7	7	7	7	7	7	7	7	7	7	7	无	7	7	7	7	7
443	2	1	2	2	2	2	2	5	1	2	4	2	2	5	4	4	7	7	3	3	2	3	4	4	4	4	4	3	3	3	3	3	3	3	3	3	3	3	3	3	3	3	3	无	3.25	5.25	3	3.83333	4
444	2	1	3	1	4	1	1	1	1	1	1	3	3	3	3	3	3	3	3	3	3	3	3	3	3	3	3	3	3	3	3	3	3	3	3	3	3	3	3	6	6	6	6	无	3	3	3	3	3
445	1	1	1	1	3	1	1	5	2	3	4	6	6	5	4	4	4	3	3	3	4	3	3	4	3	4	3	3	4	3	3	3	4	3	3	3	4	3	3	3	4	4	3	无	5.25	3.5	3.25	4	3.5
446	1	1	1	1	3	1	1	5	2	2	4	2	2	2	2	2	2	2	2	2	2	2	2	2	2	2	2	2	2	2	2	2	2	2	2	2	2	2	2	2	2	2	2	暂时没有	2	2	2	2	2
447	2	1	2	1	3	2	2	2	2	1	4	3	2	4	3	3	4	3	4	4	3	4	3	4	3	4	3	4	3	4	3	4	3	4	3	4	3	4	3	3	4	3	4	无	3	3.5	3.5	3.33333	3.5
448	2	1	3	1	2	1	1	2	1	1	1	5	6	4	7	5	5	5	5	6	5	5	5	5	5	5	5	7	5	5	5	2	5	5	5	4	4	4	7	7	7	7	4	社会上依旧缺少对于党务工作专业的相关指导	5.5	5	5.25	5.25	5
449	1	1	2	1	4	1	1	4	2	1	4	5	3	6	5	5	3	6	4	5	7	3	5	5	6	3	4	7	3	7	7	7	7	2	4	6	5	6	5	7	5	5	6	取消晚自习	4.75	4.5	5	4.75	4.5
450	2	1	3	1	4	3	1	1	1	1	4	3	1	2	7	4	3	5	6	5	5	5	5	2	2	2	3	3	3	3	3	1	4	4	4	5	7	7	7	7	7	6	7	无	3.25	4.5	5	4.25	2.25
451	2	1	2	1	3	2	3	2	2	2	1	7	4	5	5	7	7	4	7	4	7	7	7	7	7	7	7	7	7	7	7	7	7	7	7	4	4	6	6	5	5	7	7	没有	5.25	6.25	6.25	5.91667	7
452	1	1	5	1	4	1	1	2	1	1	4	7	7	7	7	7	7	7	7	7	7	7	7	7	7	7	7	7	7	7	7	7	7	7	7	7	7	7	7	7	7	7	7	无	7	7	7	7	7
453	1	1	1	1	4	1	1	5	2	3	4	1	1	1	1	1	1	1	1	1	1	1	1	1	1	1	1	1	1	1	1	1	1	1	1	1	1	1	1	1	1	1	1	无	1	1	1	1	1
454	2	1	3	1	3	2	2	1	1	1	1	7	7	7	7	7	7	7	7	7	7	7	7	7	7	7	7	7	7	7	7	7	7	7	7	7	7	7	7	7	7	7	7	无	7	7	7	7	7
455	2	1	1	1	2	2	1	1	1	3	1	4	2	2	4	6	2	3	2	1	1	1	1	1	1	2	3	3	2	2	2	1	1	1	1	1	1	1	3	1	1	3	3	无	3	3.25	1	2.41667	1.75
456	2	3	2	1	2	2	2	5	2	2	4	7	7	7	7	7	7	7	7	7	7	7	7	7	7	7	7	7	7	7	7	7	7	7	7	7	7	7	7	7	7	7	7	无	7	7	7	7	7
457	2	4	1	1	4	1	1	2	1	1	4	7	7	6	7	7	6	6	6	6	6	7	7	7	7	6	6	7	6	7	6	7	7	7	7	7	6	7	6	7	7	6	7	无	6.75	6.25	6.5	6.5	6.5
458	1	1	1	1	4	3	3	1	1	2	1	5	5	5	5	5	5	5	5	5	5	5	5	5	5	5	5	5	5	5	5	5	5	5	5	5	5	5	5	5	5	5	5	无	5	5	5	5	5
459	1	1	1	1	3	2	2	1	2	1	1	5	3	4	4	5	5	3	4	5	4	4	5	5	4	5	5	5	5	5	5	5	5	5	5	5	5	5	5	5	5	5	5	无	4	4.25	4.5	4.25	4.75
460	2	1	1	1	2	3	3	5	2	1	1	7	7	7	7	7	7	7	7	7	7	7	7	7	7	7	7	7	7	7	7	7	7	7	7	7	7	7	7	7	7	7	7	无	7	7	7	7	7
461	2	1	1	2	2	1	1	4	2	2	4	4	4	4	4	4	4	4	4	4	4	4	4	4	4	4	4	4	4	4	4	4	4	4	4	4	4	4	4	4	4	4	4	无	4	4	4	4	4
462	2	1	2	1	4	1	2	1	1	2	1	5	5	5	5	5	5	5	5	5	5	5	5	5	6	5	6	7	6	6	6	6	6	6	6	6	6	6	6	6	6	6	6	无	5	5	5	5	5.5
463	2	1	3	1	2	1	1	1	1	1	4	6	4	3	6	4	4	4	5	2	2	3	7	4	3	7	2	5	2	3	3	2	4	7	5	5	5	5	7	3	3	4	3	建议	4.75	4.25	3.5	4.16667	4
464	1	1	1	1	2	3	3	3	1	1	1	7	7	7	7	7	7	7	7	7	7	7	7	7	7	7	7	7	7	7	7	7	7	7	7	7	7	7	7	7	7	7	7	无	7	7	7	7	7
465	1	1	1	1	4	1	1	5	2	3	1	4	4	4	4	4	4	4	4	4	4	4	4	4	4	4	4	4	4	4	4	4	4	4	4	4	4	4	4	4	4	4	4	无	4	4	4	4	4
466	1	1	1	2	1	3	2	3	2	2	1	4	4	4	4	4	4	4	4	4	4	4	4	4	4	4	4	4	4	4	4	4	4	4	4	4	4	4	4	4	4	4	4	无	4	4	4	4	4
467	1	1	1	1	2	3	2	1	1	1	4	2	2	2	4	2	2	2	2	6	6	6	4	5	5	5	5	7	6	4	2	5	5	5	5	5	5	5	5	6	6	6	6	无	2.5	2	5.5	3.33333	5
468	1	1	2	1	4	1	1	4	2	2	1	7	5	7	7	4	3	4	7	7	7	2	3	4	4	4	4	7	4	4	4	4	4	4	7	2	2	2	2	3	3	4	4	/	6.5	4.5	4.75	5.25	4
469	1	1	1	1	4	1	1	4	1	2	4	6	6	6	6	6	6	6	6	6	6	6	6	6	6	6	6	6	6	6	6	6	6	6	6	6	6	6	6	6	6	6	6	无	6	6	6	6	6
470	2	3	3	1	2	3	1	2	1	1	2	5	5	7	6	6	5	6	6	7	7	7	7	6	6	5	6	7	6	6	5	4	7	6	6	6	6	6	7	6	6	6	6	无	5.75	5.75	7	6.16667	5.75
471	2	1	3	1	4	1	1	2	1	3	4	4	4	5	3	4	3	4	5	4	4	4	4	4	3	4	4	4	3	4	4	3	3	4	4	4	4	4	6	4	4	4	4	无	4	4	4	4	3.75
472	2	1	1	1	2	3	2	2	1	2	4	4	4	4	4	4	4	4	4	4	4	4	4	4	4	4	4	4	4	4	4	4	4	4	4	4	4	4	4	4	4	4	4	无	4	4	4	4	4
473	2	2	5	1	4	1	1	1	2	2	2	4	4	4	4	4	4	4	4	4	4	4	4	4	4	4	4	4	4	4	4	6	5	5	5	4	4	4	4	4	4	4	4	无	4	4	4	4	4
474	1	1	1	1	3	1	1	1	1	1	4	7	7	7	7	7	7	7	7	7	7	7	7	7	7	7	7	7	7	7	7	7	7	7	7	7	7	7	7	7	7	7	7	无	7	7	7	7	7
475	2	2	3	1	2	1	1	1	1	1	1	7	7	7	7	7	7	7	7	7	7	7	7	7	7	7	7	7	7	7	7	7	7	7	7	7	7	7	7	7	7	7	7	无	7	7	7	7	7
476	2	3	2	1	2	1	1	5	2	3	4	4	4	4	4	4	4	4	4	4	4	4	4	4	4	4	4	4	4	4	4	4	4	4	4	4	4	4	4	4	4	4	4	无	4	4	4	4	4
477	2	1	2	1	4	1	1	3	2	1	1	6	5	5	6	5	4	5	4	5	4	5	5	5	4	5	5	5	6	5	5	3	5	4	6	5	5	5	3	5	4	5	5	无	5.5	4.5	4.75	4.91667	4.75
478	1	1	1	1	4	1	1	2	2	1	1	3	4	4	3	4	4	4	3	4	3	3	3	3	3	3	3	3	3	3	3	3	3	3	3	2	2	2	2	2	2	2	2	无	3.5	3.75	3.25	3.5	3
479	2	3	2	1	4	1	1	2	2	2	3	5	4	4	4	4	4	4	4	4	4	4	4	4	4	4	4	5	4	4	5	5	4	4	4	4	4	4	4	4	4	4	4	没有	4.25	4	4	4.08333	4
480	2	1	2	1	4	2	2	1	1	2	4	3	3	3	3	3	3	3	3	3	3	3	3	3	3	3	3	3	3	3	3	3	3	3	3	3	3	3	3	4	4	4	4	无	3	3	3	3	3
481	1	1	3	2	4	2	2	1	2	2	1	4	4	4	4	4	4	4	4	4	4	4	4	4	4	4	4	4	4	4	4	4	3	5	2	4	4	4	4	4	4	4	4	无	4	4	4	4	4
482	2	1	1	1	1	1	1	3	2	1	4	4	4	4	4	4	4	4	4	4	4	4	4	4	4	4	4	4	4	4	4	4	4	4	4	4	4	4	4	4	4	4	4	无	4	4	4	4	4
483	1	1	1	1	2	1	1	3	2	3	4	1	1	1	7	1	1	1	1	1	1	1	1	1	1	1	1	1	1	1	1	1	1	1	1	1	1	1	1	1	1	1	1	不知道学的什么一点专业课都没有	2.5	1	1	1.5	1
484	2	3	2	1	3	1	1	2	2	1	1	7	7	7	7	5	5	5	5	5	5	5	5	5	5	5	5	5	5	5	5	5	5	5	5	5	5	5	5	5	5	5	5	无	7	5	5	5.66667	5
485	2	3	2	1	4	2	1	2	2	1	1	7	7	6	6	6	6	6	6	6	6	6	6	6	3	5	5	5	5	5	5	5	5	5	5	5	5	5	5	5	5	5	5	无	6.5	6	6	6.16667	4.75
486	2	3	2	1	3	2	2	3	1	1	1	5	5	5	5	5	5	5	5	5	5	5	5	5	5	5	5	6	6	6	6	5	5	5	5	6	6	6	6	5	5	5	5	有	5	5	5	5	5
487	1	3	2	1	4	1	1	2	1	1	3	7	7	7	7	7	4	4	7	7	7	7	7	7	7	7	7	7	7	7	7	7	7	7	7	7	7	7	7	7	7	7	7	无	7	5.5	7	6.5	7
488	1	1	1	1	3	1	1	2	2	2	1	4	4	4	4	4	4	4	4	4	4	4	4	4	4	4	4	4	4	4	4	4	4	4	4	4	4	4	4	4	4	4	4	无	4	4	4	4	4
489	2	3	5	1	3	1	1	2	1	1	1	7	7	7	7	7	7	7	7	7	7	7	7	7	7	7	7	7	7	7	7	7	7	7	7	7	7	7	7	7	7	7	7	无	7	7	7	7	7
490	2	1	1	1	4	3	3	5	2	3	1	5	5	5	5	5	5	5	5	5	5	5	5	5	5	5	5	5	5	5	5	5	5	5	5	5	5	5	5	5	5	5	5	无	5	5	5	5	5
491	1	1	1	1	4	1	2	1	1	1	1	7	7	7	7	4	7	7	7	4	5	7	5	7	7	7	7	7	7	7	7	7	7	7	7	7	7	7	7	7	7	7	7	无	7	6.25	5.25	6.16667	7
492	1	3	2	1	4	1	1	3	1	1	1	4	4	4	4	4	4	4	4	4	4	4	4	4	4	4	4	4	4	4	4	4	4	4	4	4	4	4	4	4	4	4	4	1	4	4	4	4	4
493	2	3	2	1	4	3	1	1	1	1	1	5	5	7	6	5	6	5	5	5	6	5	5	4	5	4	5	4	5	4	5	5	4	5	5	5	5	6	5	6	5	5	6	无	5.75	5.25	5.25	5.41667	4.5
494	2	3	2	1	2	3	3	1	1	2	1	5	5	5	5	3	3	4	4	7	5	4	5	4	4	4	4	4	4	4	4	4	4	4	4	4	4	4	4	4	4	4	4	无	5	3.5	5.25	4.58333	4
495	1	3	2	1	2	1	2	4	1	1	1	7	7	7	4	4	4	4	4	4	4	4	4	4	4	4	4	4	4	4	4	4	4	4	4	4	4	4	4	4	4	4	4	无	6.25	4	4	4.75	4
496	1	3	2	1	4	1	1	3	1	1	1	5	5	5	5	5	5	5	5	5	5	5	5	5	5	5	5	5	5	5	5	5	5	5	5	5	5	5	5	5	5	5	5	无	5	5	5	5	5
497	2	3	2	1	1	1	1	2	2	1	1	4	4	4	4	4	4	4	4	4	4	4	4	4	4	4	4	4	4	4	4	4	4	4	4	4	4	4	4	4	4	4	4	无	4	4	4	4	4
498	1	1	1	1	3	1	2	1	1	1	1	7	6	5	7	7	5	4	7	5	5	4	4	7	7	7	7	7	7	7	6	4	4	4	6	7	6	6	5	6	6	7	7	无	6.25	5.75	4.5	5.5	7
499	2	1	1	1	4	1	1	3	2	3	4	4	4	4	4	4	4	4	4	4	4	4	4	4	4	4	4	4	4	4	4	4	4	4	4	4	4	4	4	4	4	4	4	没有	4	4	4	4	4
500	2	3	2	1	3	1	2	5	2	2	1	4	5	4	3	4	5	5	3	4	3	5	3	4	5	4	3	4	3	3	4	5	3	3	3	5	4	4	5	5	5	4	5	无	4	4.25	3.75	4	4
501	2	1	3	1	3	2	3	2	2	1	3	7	7	7	7	7	7	7	7	6	6	6	6	5	6	6	6	6	6	6	6	5	5	5	5	6	6	6	6	6	6	6	6	无	7	7	6	6.66667	5.75
502	2	1	2	2	2	3	2	1	2	1	1	2	2	2	2	2	2	2	2	2	2	5	4	4	4	2	4	3	4	4	4	4	3	3	3	4	4	4	2	3	5	3	4	.	2	2	3.25	2.41667	3.5
503	2	3	2	1	2	2	2	3	2	1	1	5	5	5	5	6	6	5	5	6	6	6	5	6	6	6	5	6	5	5	5	5	5	6	6	5	5	5	5	6	5	5	5	无	5	5.5	5.75	5.41667	5.75
504	2	3	2	1	1	2	2	1	1	1	1	4	4	4	4	4	4	4	4	4	4	4	4	3	3	3	3	3	3	3	3	3	3	3	3	3	3	3	3	4	4	4	4	帮我提供一些优质实习、实践岗位	4	4	4	4	3
505	1	3	3	1	4	1	1	3	1	2	3	6	5	6	6	6	6	5	6	6	6	5	6	6	6	5	6	5	7	7	7	7	7	7	6	7	6	4	6	6	6	5	6	无	5.75	5.75	5.75	5.75	5.75
506	2	1	2	1	2	3	3	1	1	1	1	6	6	6	6	5	5	5	5	5	5	5	5	5	5	5	5	5	5	5	5	5	5	5	5	5	5	5	5	5	5	5	5	有的时候会迷茫不知道未来到底会干什么 但还是会尽量提升自己	6	5	5	5.33333	5
507	2	3	2	1	1	3	3	1	1	1	2	5	4	4	4	4	4	4	4	4	4	4	4	4	4	4	4	4	4	4	4	4	4	4	4	4	4	4	4	4	4	4	4	无	4.25	4	4	4.08333	4
508	2	3	2	1	2	3	3	2	1	1	1	4	4	4	4	4	4	4	4	4	4	4	4	4	4	4	5	4	5	4	5	4	5	4	5	4	4	4	4	4	4	4	4	无	4	4	4	4	4.25
509	2	1	5	1	3	2	1	2	2	1	1	4	4	4	4	4	4	4	4	4	4	4	4	4	4	4	4	4	4	4	4	4	4	4	4	4	4	4	4	4	4	4	4	无	4	4	4	4	4
510	2	3	2	1	4	3	3	1	1	1	1	4	4	4	4	4	4	4	4	4	4	4	4	4	4	4	4	4	4	4	4	4	4	4	4	4	4	4	4	4	4	4	4	无	4	4	4	4	4
511	2	3	2	2	4	1	1	2	2	1	1	5	4	5	5	5	4	5	5	5	5	5	5	5	4	4	4	6	5	5	3	3	5	3	5	5	5	5	5	5	5	5	4	无	4.75	4.75	5	4.83333	4.25
512	1	2	1	1	1	2	2	4	1	3	4	7	7	7	7	7	7	7	7	7	7	7	7	7	7	7	7	7	7	7	7	7	7	7	7	7	7	7	7	7	7	7	7	系统搭建了职业发展所需的知识框架，为后续岗位实践、行业深造提供了底层支撑。例如专业核心课覆盖了行业核心技术、基础原理与行业规范，让我在求职与岗位适配中具备了基础竞争力，为实现“成为行业专业技术/管理人才”的职业目标奠定了理论基础。	7	7	7	7	7
513	1	3	3	1	2	2	3	5	2	2	2	2	2	7	7	7	7	7	7	7	7	5	1	2	6	3	6	4	5	4	2	2	2	5	2	3	2	3	3	3	6	6	3	有一些相对用处很小的课，凭心而论对职业发展助力不足	4.5	7	5	5.5	4.25
514	2	3	2	2	2	2	3	3	2	1	1	7	7	7	7	7	7	7	7	7	7	7	7	7	7	7	7	7	7	7	7	7	7	7	7	7	7	7	7	7	7	7	7	无	7	7	7	7	7
515	1	1	1	1	1	1	3	5	1	1	2	1	5	5	5	1	4	5	5	4	4	5	4	4	4	4	4	4	3	4	5	3	5	5	5	3	3	5	3	3	5	5	7	不用	4	3.75	4.25	4	4
516	2	3	2	1	4	1	3	1	1	1	1	7	7	7	7	7	7	7	7	7	7	7	7	7	7	7	7	7	7	7	7	7	7	7	7	7	7	7	7	7	7	7	7	无	7	7	7	7	7
517	2	1	3	1	4	1	1	5	2	2	4	4	4	4	4	4	4	4	4	4	4	4	5	4	3	4	4	7	7	4	4	5	5	5	5	7	7	7	7	5	3	5	5	无	4	4	4.25	4.08333	3.75
518	1	1	1	1	3	1	1	5	1	1	1	7	7	7	7	7	7	7	7	7	7	7	7	7	7	7	7	7	7	7	7	7	7	7	7	7	7	7	7	7	7	7	7	无	7	7	7	7	7
519	2	3	2	1	3	1	1	1	1	1	1	4	4	4	4	4	4	4	4	4	4	4	4	4	4	4	4	4	4	4	4	4	4	4	4	4	4	4	4	4	4	4	4	无	4	4	4	4	4
520	2	3	2	1	4	2	2	1	1	1	1	6	6	6	6	3	3	3	3	3	3	3	3	3	3	3	3	3	3	3	3	3	3	3	3	3	3	3	3	3	3	3	3	无	6	3	3	4	3
521	1	1	5	1	4	4	4	3	2	1	4	2	2	2	2	2	2	3	3	3	3	3	3	2	2	2	3	2	3	2	2	2	3	2	2	2	2	2	3	2	3	2	2	无	2	2.5	3	2.5	2.25
522	2	3	5	1	4	2	2	3	2	1	1	7	7	7	7	7	7	7	7	7	7	7	7	7	7	7	7	7	7	7	7	7	7	7	7	7	7	7	7	7	7	7	7	无	7	7	7	7	7
523	2	1	2	1	3	2	1	2	2	1	2	4	5	5	5	4	4	5	5	3	4	5	4	3	3	3	3	3	3	4	4	3	5	4	4	3	5	4	4	4	4	4	4	无	4.75	4.5	4	4.41667	3
524	2	4	2	1	2	2	2	2	2	3	4	4	2	4	4	3	5	5	2	5	5	3	5	5	2	5	5	5	5	5	2	3	5	2	2	4	2	3	5	4	3	5	2	无	3.5	3.75	4.5	3.91667	4.25
525	2	3	3	1	4	1	1	1	1	2	1	5	5	5	5	5	5	5	5	5	5	5	5	5	5	5	5	5	5	5	5	5	5	5	5	5	5	5	5	5	5	5	5	无	5	5	5	5	5
526	2	3	5	1	2	3	2	5	2	3	1	7	5	5	5	5	5	5	5	5	5	5	5	6	5	5	3	5	3	4	1	4	4	4	4	4	4	4	4	4	4	4	4	无	5.5	5	5	5.16667	4.75
527	2	1	2	1	2	3	2	2	1	2	4	4	3	3	5	4	4	4	3	3	3	4	3	4	3	4	3	7	4	6	3	3	4	4	4	5	3	4	6	4	4	4	4	无	3.75	3.75	3.25	3.58333	3.5
528	1	1	1	1	2	3	3	3	2	1	1	7	7	7	7	4	4	4	4	6	6	4	5	5	7	4	5	4	5	5	5	5	5	5	5	5	5	5	5	5	5	5	5	没用	7	4	5.25	5.41667	5.25
529	1	1	2	1	2	3	3	1	1	1	1	5	5	5	5	5	5	5	5	5	5	5	5	5	5	5	5	5	5	5	5	5	5	5	5	5	5	5	5	5	5	5	5	无	5	5	5	5	5
530	1	3	2	1	3	2	2	2	1	1	1	7	7	7	7	7	7	7	7	7	7	7	7	7	7	7	7	7	7	7	7	7	7	7	7	7	7	7	7	7	7	7	7	应帮助学生更好的实习	7	7	7	7	7
531	1	1	2	1	4	2	2	5	2	3	1	7	7	7	7	7	7	7	7	7	7	7	7	7	7	7	7	7	7	7	7	7	7	7	7	7	7	7	7	7	7	7	7	无	7	7	7	7	7
532	1	2	2	1	3	3	2	1	2	1	1	5	5	4	5	5	4	5	4	5	4	5	4	5	4	5	4	4	5	4	4	5	5	4	5	5	5	5	5	4	5	4	5	无	4.75	4.5	4.5	4.58333	4.5
533	2	3	2	1	3	1	1	3	1	3	3	4	2	4	4	4	3	4	4	4	4	4	4	4	4	4	4	4	4	4	4	4	4	4	4	4	4	4	4	4	4	4	4	没有	3.5	3.75	4	3.75	4
534	2	3	2	1	4	1	2	3	2	3	1	2	1	4	5	3	4	4	2	7	7	7	7	7	7	7	7	7	7	7	7	7	7	7	7	7	7	7	7	7	7	7	7	无	3	3.25	7	4.41667	7
535	2	3	2	1	2	3	3	1	2	1	1	5	5	5	6	5	4	4	6	7	7	5	6	7	7	7	7	7	7	7	7	5	7	7	7	6	6	6	6	7	7	7	7	老师指导就业	5.25	4.75	6.25	5.41667	7
536	2	3	2	1	2	1	1	1	1	1	1	4	5	5	4	6	5	5	6	5	6	5	6	4	4	4	4	6	6	6	4	4	6	6	6	5	4	5	4	5	4	5	4	无	4.5	5.5	5.5	5.16667	4
537	1	1	2	1	2	3	2	2	2	1	1	7	7	7	7	7	7	7	7	7	7	7	7	7	7	7	7	7	7	7	7	7	7	7	7	7	7	7	7	7	7	7	7	无	7	7	7	7	7
538	1	3	3	1	3	3	3	3	2	1	1	4	4	4	4	4	4	4	4	4	4	4	4	4	4	4	4	4	4	4	4	4	4	4	4	4	4	4	4	4	4	4	4	无建议	4	4	4	4	4
539	2	1	1	1	4	1	1	4	2	1	1	2	2	3	6	3	3	4	4	3	4	5	4	4	4	4	5	7	4	4	4	2	5	4	5	5	4	4	4	5	5	5	3	无	3.25	3.5	4	3.58333	4.25
540	2	4	2	1	4	1	1	2	2	2	3	6	6	3	4	4	7	5	3	7	3	6	2	7	5	6	5	7	3	6	7	7	5	6	7	7	2	4	6	5	5	5	5	无	4.75	4.75	4.5	4.66667	5.75
541	1	1	2	1	4	1	1	1	2	1	1	6	5	7	7	5	7	7	7	7	7	6	7	6	6	7	7	7	6	7	6	6	7	6	7	7	7	7	7	7	7	7	6	无	6.25	6.5	6.75	6.5	6.5
542	2	3	2	1	2	2	2	4	2	1	1	7	7	7	7	5	5	6	5	5	6	6	5	5	6	6	5	6	6	6	6	5	5	5	5	5	5	5	6	5	5	5	5	。	7	5.25	5.5	5.91667	5.5
543	1	3	2	1	3	3	3	2	1	1	3	7	7	7	7	7	7	7	7	7	7	7	7	7	7	7	7	7	7	7	7	7	7	7	7	7	7	7	7	7	7	7	7	无	7	7	7	7	7
544	1	1	1	1	4	2	1	1	1	1	1	5	4	3	6	5	5	5	4	5	4	4	4	4	4	4	4	7	7	7	7	5	7	6	6	5	2	3	4	7	7	7	7	多开点专业课	4.5	4.75	4.25	4.5	4
545	2	3	5	1	2	2	2	2	2	2	4	5	5	5	5	4	4	4	5	4	5	5	5	4	4	4	4	4	4	4	4	4	4	4	4	4	4	4	4	4	4	4	4	。	5	4.25	4.75	4.66667	4
546	2	1	3	1	4	2	2	4	1	1	4	2	2	2	2	2	2	2	2	2	2	2	2	2	2	3	3	3	3	3	3	3	3	3	3	3	3	3	3	3	3	3	3	没有	2	2	2	2	2.5
547	2	1	2	1	1	4	3	4	1	3	3	1	5	5	5	1	1	1	1	1	1	1	1	1	1	1	1	1	5	1	5	1	6	5	2	2	4	2	2	2	4	2	2	无	4	1	1	2	1
548	2	3	3	1	3	1	1	4	2	1	2	5	4	4	5	5	3	4	5	5	5	5	5	5	5	5	5	5	5	5	5	5	5	5	3	5	5	5	5	5	5	5	5	无	4.5	4.25	5	4.58333	5
549	1	1	1	1	2	3	3	2	1	2	1	5	2	1	7	6	5	6	4	2	5	4	1	6	6	6	7	4	3	2	3	1	2	5	6	2	5	5	6	5	3	3	4	无	3.75	5.25	3	4	6.25
550	1	2	1	1	4	1	1	2	1	2	1	5	5	5	5	5	5	5	5	5	5	5	5	5	5	5	5	6	5	5	5	3	4	4	4	5	5	5	5	5	5	5	5	无	5	5	5	5	5
551	1	3	1	1	4	2	2	4	1	1	1	7	7	7	7	7	7	7	7	7	7	7	7	7	7	7	7	7	7	7	7	7	7	7	7	7	7	7	7	7	7	7	7	无	7	7	7	7	7
552	2	3	2	1	3	2	1	1	1	1	1	6	2	3	3	4	4	4	4	4	4	4	4	4	4	3	4	3	5	3	5	3	3	2	4	3	2	3	4	3	4	2	4	无	3.5	4	4	3.83333	3.75
553	1	1	1	1	4	1	1	1	2	1	1	7	7	7	7	7	7	7	7	7	7	7	7	7	7	7	7	7	7	7	7	7	7	7	7	7	7	7	7	7	7	7	7	无	7	7	7	7	7
554	2	3	2	1	4	2	1	2	2	1	1	5	4	4	5	5	5	5	6	4	5	5	5	4	4	4	4	5	6	4	4	3	5	4	5	4	4	4	5	4	3	4	3	无	4.5	5.25	4.75	4.83333	4
555	2	1	2	1	4	1	1	3	2	1	4	5	3	4	6	4	2	4	5	5	6	3	2	2	2	4	5	7	5	7	4	1	5	3	2	3	4	5	6	4	3	6	4	无	4.5	3.75	4	4.08333	3.25
556	1	3	2	1	3	3	1	5	2	2	1	4	4	4	4	4	4	4	4	4	4	4	4	4	4	4	4	4	4	4	4	4	4	4	4	4	4	4	4	4	4	4	4	无	4	4	4	4	4
557	2	3	3	1	4	3	1	2	1	1	2	5	3	4	5	4	3	4	4	5	4	5	4	4	4	5	6	6	5	4	5	3	4	5	4	4	5	5	5	5	5	5	4	进一步发挥学生的主观能动性，提高学生在课堂中的主动性。	4.25	3.75	4.5	4.16667	4.75
558	2	3	2	1	2	2	1	3	2	3	1	7	7	7	7	7	7	7	7	7	7	7	7	7	7	7	7	7	7	7	7	7	7	7	7	7	7	7	7	7	7	7	7	无	7	7	7	7	7
559	1	1	1	1	4	2	1	1	1	1	1	4	4	4	4	4	4	4	4	4	4	4	4	4	4	4	4	4	4	4	4	4	4	4	4	4	4	4	4	4	4	4	4	多开点专业课比啥都强，现在都不开专业课，啥事也没有	4	4	4	4	4
560	1	1	1	1	2	3	3	4	2	3	2	5	5	5	5	5	5	5	5	5	5	5	5	5	5	5	5	5	5	5	5	5	5	5	5	5	5	5	5	5	5	5	5	无	5	5	5	5	5
561	1	3	2	2	2	1	1	5	1	1	1	4	4	4	5	3	3	3	3	3	3	3	3	3	3	3	3	3	3	3	3	3	3	3	3	4	3	4	4	3	3	3	3	没有	4.25	3	3	3.41667	3
562	1	3	1	1	4	1	1	2	2	1	4	3	2	2	2	2	2	2	2	2	2	2	2	2	2	2	2	2	2	2	2	2	2	2	2	2	2	2	2	2	2	2	2	无	2.25	2	2	2.08333	2
563	2	1	1	1	3	2	1	3	2	2	3	6	6	6	6	6	6	6	6	6	6	6	6	6	6	6	6	5	5	5	5	5	5	5	5	4	4	4	4	4	4	4	4	无	6	6	6	6	6
564	2	3	2	1	4	2	1	2	2	2	1	4	4	4	4	4	4	4	4	4	4	4	4	4	4	4	4	4	4	4	4	4	4	4	4	4	4	4	4	4	4	4	4	帮主提供一些优质实习或兼职	4	4	4	4	4
565	1	2	1	1	4	3	2	5	2	2	1	7	7	7	7	7	7	7	7	7	7	7	7	7	7	7	7	7	7	7	7	7	7	7	7	7	7	7	7	7	7	7	7	无	7	7	7	7	7
566	2	1	1	2	2	2	3	1	1	2	1	7	7	7	7	7	7	7	7	7	7	7	7	7	7	7	7	7	7	7	7	7	7	7	7	7	7	7	7	7	7	7	7	无	7	7	7	7	7
567	1	2	2	1	4	1	1	2	1	1	1	2	2	2	2	3	3	3	3	3	3	4	3	3	3	3	3	3	3	3	3	3	3	3	3	3	3	3	3	3	3	3	3	无	2	3	3.25	2.75	3
568	2	2	2	1	4	1	1	1	1	1	1	5	5	5	5	5	5	5	5	5	5	5	5	4	4	4	4	4	4	4	4	4	4	4	4	5	5	5	5	5	5	5	5	无	5	5	5	5	4
569	1	2	5	1	4	1	2	5	2	1	1	7	7	7	7	7	7	7	7	7	7	7	7	7	7	7	7	7	7	7	7	7	7	7	7	7	7	7	7	7	7	7	7	无	7	7	7	7	7
570	2	2	2	1	2	1	2	2	2	1	1	4	4	4	4	4	4	4	4	4	4	4	4	4	4	4	4	4	4	4	4	4	4	4	4	4	4	4	4	4	4	4	4	无	4	4	4	4	4
571	1	1	5	1	4	1	1	5	2	3	4	1	1	2	2	2	2	3	3	4	3	3	3	4	4	3	4	3	3	3	3	3	3	3	3	4	5	3	4	3	3	2	3	无	1.5	2.5	3.25	2.41667	3.75
572	2	2	2	1	4	1	2	2	1	1	1	5	5	5	6	4	3	5	6	7	7	7	7	7	7	7	7	6	6	6	6	6	6	4	4	7	7	7	7	7	7	7	7	无	5.25	4.5	7	5.58333	7
573	2	2	5	1	2	3	2	4	2	2	1	5	5	5	5	5	6	5	5	5	5	5	5	5	5	5	5	4	5	5	4	5	5	5	5	5	5	5	5	5	5	4	5	无	5	5.25	5	5.08333	5
574	2	1	1	1	4	1	1	2	2	2	1	7	7	7	7	7	7	7	7	7	7	7	7	7	7	7	7	7	7	7	7	7	7	7	7	7	7	7	7	7	7	7	7	无	7	7	7	7	7
575	2	3	2	1	2	1	1	1	1	1	1	7	7	7	7	7	7	7	7	7	7	7	7	7	7	7	7	7	7	7	7	7	7	7	7	7	7	7	7	7	7	7	7	无	7	7	7	7	7
576	2	2	2	1	4	2	1	4	2	1	1	7	7	7	7	7	7	7	7	7	7	7	7	7	7	7	7	7	7	7	7	7	7	7	7	7	7	7	7	7	7	7	7	无	7	7	7	7	7
577	2	3	3	1	2	1	1	4	2	1	3	5	5	4	4	5	4	4	5	5	4	4	5	5	4	4	5	5	4	4	4	3	4	3	4	3	3	4	4	4	4	3	4	无	4.5	4.5	4.5	4.5	4.5
578	1	1	1	1	4	2	2	2	2	1	1	6	6	6	6	6	6	6	6	6	6	6	6	6	6	6	6	6	6	6	6	6	6	6	6	6	6	6	6	6	6	6	6	无	6	6	6	6	6
579	1	1	1	1	4	1	1	5	2	1	4	3	3	5	5	3	3	4	5	3	5	2	2	4	2	6	5	5	2	2	1	6	6	6	6	6	6	6	6	6	6	6	6	无	4	3.75	3	3.58333	4.25
580	1	3	2	1	2	1	2	2	1	2	1	7	7	7	7	7	7	7	7	7	7	7	7	7	7	7	7	7	7	7	7	7	7	7	7	7	7	7	7	7	7	7	7	很好	7	7	7	7	7
581	2	3	1	2	4	1	1	2	1	2	4	4	4	4	4	4	4	4	4	4	4	4	4	4	4	4	4	4	4	4	4	4	4	4	4	4	5	4	5	5	5	5	5	无	4	4	4	4	4
582	2	2	2	1	4	1	1	1	2	1	1	7	5	4	5	5	5	4	3	4	5	5	6	4	5	5	5	5	4	5	5	3	4	5	6	5	5	5	5	5	6	6	6	无	5.25	4.25	5	4.83333	4.75
583	1	1	3	1	2	3	3	3	2	2	4	4	4	5	6	4	4	5	5	3	4	3	5	5	4	4	5	5	5	4	4	5	4	4	4	5	5	5	5	6	5	5	4	行	4.75	4.5	3.75	4.33333	4.5
584	2	1	2	1	2	1	1	1	1	1	1	4	4	4	4	4	4	4	4	4	4	4	4	4	4	4	4	4	4	4	4	4	4	4	4	5	4	4	4	4	4	4	4	无	4	4	4	4	4
585	2	3	2	1	2	1	1	1	1	2	1	4	4	4	4	4	4	4	4	4	4	4	4	4	4	4	4	4	4	4	4	4	4	4	4	4	4	4	4	4	4	4	4	。	4	4	4	4	4
586	1	1	2	1	2	3	2	3	2	1	1	4	4	4	4	3	3	4	4	4	3	5	4	4	4	5	3	4	4	4	4	4	4	4	4	5	3	4	4	4	4	4	4	无	4	3.5	4	3.83333	4
587	2	2	2	1	2	3	1	1	2	2	1	3	3	3	3	3	3	3	3	3	3	3	3	3	3	3	3	3	3	3	3	3	3	3	3	3	3	3	3	3	3	3	3	教学内容与实习工作衔接不紧密	3	3	3	3	3
588	1	1	1	1	1	3	3	1	1	1	1	6	6	6	6	5	6	6	6	6	6	6	6	6	6	6	6	6	6	6	3	6	6	6	6	6	6	6	6	6	6	6	6	无	6	5.75	6	5.91667	6
589	2	1	2	1	2	2	2	3	2	2	1	7	7	7	7	7	7	7	7	7	7	7	7	7	7	7	7	7	7	7	7	7	7	7	7	7	7	7	7	7	7	7	7	无	7	7	7	7	7
590	2	2	2	1	4	1	1	2	2	1	1	4	4	4	4	4	4	4	4	4	4	4	4	4	4	4	4	4	4	4	4	4	4	4	4	4	4	4	4	4	4	4	4	无	4	4	4	4	4
591	2	3	3	1	2	3	3	4	2	1	2	4	4	4	4	4	4	4	4	4	4	4	4	4	4	4	4	4	4	4	4	4	4	4	4	4	4	4	4	4	4	4	4	无	4	4	4	4	4
592	2	1	1	1	3	1	1	2	2	1	1	7	7	1	6	1	1	2	1	2	2	2	2	4	4	3	3	3	4	3	2	3	3	3	3	3	3	3	4	2	2	2	2	无	5.25	1.25	2	2.83333	3.5
593	2	3	3	1	2	2	1	1	1	2	3	4	4	4	4	4	4	4	4	4	4	4	4	4	4	4	4	4	4	4	4	4	4	4	4	4	4	4	4	4	4	4	4	无	4	4	4	4	4
594	2	2	2	1	4	1	1	2	2	1	1	5	5	5	5	5	5	5	5	5	5	5	5	5	5	5	5	7	5	5	5	4	4	4	4	6	6	6	6	5	5	5	5	无	5	5	5	5	5
595	2	2	3	1	4	1	1	1	2	2	1	7	3	3	7	4	6	6	6	4	5	5	6	5	6	7	7	7	3	4	3	3	5	5	5	4	4	3	5	5	5	7	6	无	5	5.5	5	5.16667	6.25
596	1	1	3	1	2	2	1	5	2	1	1	4	4	4	3	5	4	5	3	3	4	4	3	5	6	3	4	3	4	5	4	5	3	4	5	5	4	4	4	3	4	5	3	无	3.75	4.25	3.5	3.83333	4.5
597	1	2	1	1	2	2	1	4	1	1	1	3	4	4	4	5	4	4	4	4	4	4	4	4	4	4	4	6	4	5	4	4	4	4	4	7	7	7	7	6	6	5	5	无	3.75	4.25	4	4	4
598	1	3	1	1	1	1	3	1	1	1	3	1	2	2	2	2	2	2	1	1	1	1	1	1	1	1	1	1	1	1	1	1	1	1	1	1	1	1	1	1	1	1	1	w	1.75	1.75	1	1.5	1
599	1	1	1	1	3	1	1	2	1	2	3	4	5	4	5	5	4	5	4	3	4	3	3	4	4	4	4	4	4	4	4	4	4	4	4	4	4	4	4	4	4	4	4	没有	4.5	4.5	3.25	4.08333	4
600	2	2	2	1	4	1	2	3	2	2	1	3	2	3	5	4	4	5	6	6	7	5	6	6	5	6	6	7	7	5	4	1	6	5	7	5	5	4	6	6	5	5	6	时间安排空隙少	3.25	4.75	6	4.66667	5.75
601	1	3	1	1	2	1	1	4	1	2	3	7	7	7	7	7	7	7	7	7	7	7	7	7	7	7	7	7	7	7	7	7	7	7	7	7	7	7	7	7	7	7	7	无	7	7	7	7	7
602	2	3	3	1	2	3	3	1	1	1	3	7	7	7	7	7	7	7	7	7	7	7	7	7	7	7	7	7	7	7	6	7	7	6	7	7	7	7	7	7	7	7	4	职本专业目录没有纳入公务员招考目录，非常影响就业	7	7	7	7	7
603	2	1	2	2	2	3	3	1	1	1	2	7	7	7	7	6	6	6	6	7	7	7	7	6	7	7	7	7	7	6	5	5	5	5	5	6	6	6	6	6	6	6	6	无	7	6	7	6.66667	6.75
604	1	1	3	1	4	1	1	4	2	2	1	4	5	4	4	4	4	4	4	4	4	4	3	3	3	3	3	4	4	4	4	4	4	4	4	3	4	4	4	4	4	4	4	无	4.25	4	3.75	4	3
605	1	2	2	1	2	2	2	3	1	2	1	3	3	4	4	3	4	3	4	3	4	4	3	4	3	3	4	4	3	4	3	4	3	4	3	4	4	5	4	3	4	3	4	无	3.5	3.5	3.5	3.5	3.5
606	2	2	2	1	2	1	1	1	1	1	1	6	6	5	6	6	5	6	6	6	6	6	6	6	6	6	6	6	6	6	6	6	6	6	6	6	6	6	6	6	6	6	6	无	5.75	5.75	6	5.83333	6
607	2	1	2	1	4	1	1	3	1	1	2	5	4	5	4	4	4	5	3	4	4	3	4	4	4	4	4	4	3	4	4	3	3	4	4	4	5	4	7	4	5	5	4	无	4.5	4	3.75	4.08333	4
608	2	2	2	1	2	1	1	5	2	3	1	4	4	4	4	4	4	4	4	7	5	4	4	4	4	4	4	4	4	4	4	4	4	4	4	4	4	4	4	4	4	4	4	无	4	4	5	4.33333	4
609	1	2	2	1	3	1	1	3	2	1	1	5	5	5	5	4	4	4	4	4	4	4	4	4	4	4	4	4	4	4	4	4	4	4	4	4	4	4	4	4	4	4	4	无	5	4	4	4.33333	4
610	1	2	2	2	3	3	2	4	1	1	1	5	5	5	6	4	4	5	5	5	6	5	5	5	4	4	4	5	3	5	5	3	5	5	5	4	5	5	3	5	5	5	5	无	5.25	4.5	5.25	5	4.25
611	1	3	2	1	4	2	1	5	2	2	1	4	4	4	4	4	4	4	4	4	4	4	4	4	4	4	4	4	4	4	4	4	4	4	4	4	4	4	4	4	4	4	4	无	4	4	4	4	4
612	2	2	2	1	3	1	1	3	2	1	1	5	4	3	4	3	4	3	4	3	3	4	4	3	3	5	3	6	4	4	4	3	5	4	3	4	5	4	4	5	4	4	5	无	4	3.5	3.5	3.66667	3.5
613	2	2	3	1	4	1	1	2	2	2	1	2	1	1	1	1	1	1	1	1	1	1	1	1	1	1	1	4	3	3	3	2	2	2	2	2	2	2	2	2	3	3	3	无	1.25	1	1	1.08333	1
614	1	1	3	2	1	3	4	1	2	1	1	6	5	3	3	5	3	5	3	6	2	3	5	6	4	3	3	5	3	4	4	5	4	4	6	4	4	3	3	5	4	3	3	无	4.25	4	4	4.08333	4
615	2	2	2	1	2	2	2	4	2	2	1	5	4	6	6	5	5	6	6	6	6	5	4	6	6	4	5	6	6	6	6	6	6	6	6	6	4	6	6	6	6	6	6	无	5.25	5.5	5.25	5.33333	5.25
616	1	2	3	1	2	3	2	4	2	2	1	5	5	5	5	4	4	5	5	5	4	5	5	5	5	5	6	5	5	6	5	5	5	6	5	5	6	5	5	6	6	5	5	可以多增加一些实操	5	4.5	4.75	4.75	5.25
617	2	2	2	1	4	1	1	4	2	3	1	3	3	3	4	2	2	2	2	3	3	3	3	3	3	3	3	3	2	2	3	3	2	2	2	3	3	3	3	2	4	4	3	无	3.25	2	3	2.75	3
618	1	1	1	1	2	2	1	5	2	2	1	4	4	4	4	5	4	5	3	6	5	3	4	6	4	6	5	4	6	4	5	4	4	5	3	5	4	3	5	4	6	4	3	无	4	4.25	4.5	4.25	5.25
619	1	2	5	1	4	2	2	3	1	1	1	3	4	3	3	3	5	3	5	3	5	5	5	4	5	5	5	5	5	4	5	5	5	6	5	5	5	6	6	6	6	5	5	无	3.25	4	4.5	3.91667	4.75
620	2	2	5	1	4	2	1	1	1	1	1	5	4	3	5	5	4	5	3	4	5	3	3	3	3	3	3	5	2	3	4	3	5	4	5	4	3	4	4	3	3	4	5	无	4.25	4.25	3.75	4.08333	3
621	2	2	2	1	4	1	1	1	1	1	1	7	4	4	4	3	5	5	5	7	7	7	7	7	7	7	6	5	6	6	5	5	6	6	6	6	5	6	6	6	6	6	6	无	4.75	4.5	7	5.41667	6.75
622	1	2	2	1	4	1	1	4	1	1	1	4	4	4	4	4	4	4	4	4	4	4	4	4	4	4	4	4	4	4	4	4	4	4	4	4	4	4	4	4	4	4	4	无	4	4	4	4	4
623	2	2	2	1	3	3	2	1	1	1	1	7	7	7	7	7	7	7	7	7	7	7	7	7	7	7	7	7	7	7	7	7	7	7	6	7	7	7	7	7	7	7	7	无	7	7	7	7	7
624	2	2	2	1	2	2	2	3	2	1	2	5	2	5	6	6	5	6	5	4	5	5	6	5	4	4	4	5	4	4	4	2	5	4	5	5	5	5	5	5	4	4	4	无	4.5	5.5	5	5	4.25
625	2	2	5	1	4	2	2	4	2	2	1	4	4	4	4	4	4	4	4	4	4	4	4	4	5	3	5	5	5	5	5	4	4	4	4	4	4	4	4	4	4	4	4	无	4	4	4	4	4.25
626	1	2	2	1	3	1	1	5	2	1	1	5	5	4	5	4	4	4	3	4	4	4	4	5	5	5	5	6	5	4	3	4	4	4	4	4	4	4	4	4	4	5	7	无	4.75	3.75	4	4.16667	5
627	1	2	2	1	4	1	1	4	2	1	1	6	3	3	5	5	5	5	3	5	5	4	4	5	3	4	3	5	3	5	4	5	5	3	3	5	5	4	3	5	5	5	4	无	4.25	4.5	4.5	4.41667	3.75
628	2	2	5	1	2	2	2	4	2	2	1	7	7	7	7	7	7	7	7	7	7	7	7	7	7	7	7	7	7	7	7	7	7	7	7	7	7	7	7	7	7	7	7	无	7	7	7	7	7
629	2	2	2	1	4	1	1	5	2	1	1	4	4	3	4	4	5	3	4	3	4	4	3	4	3	4	3	4	3	4	4	4	5	4	3	4	3	5	4	5	3	5	4	无	3.75	4	3.5	3.75	3.5
630	2	2	5	1	3	1	1	1	1	2	1	4	5	3	5	5	4	5	5	4	5	3	5	5	3	4	4	4	5	5	3	5	5	3	5	5	4	5	4	5	4	4	5	目前没有	4.25	4.75	4.25	4.41667	4
631	1	1	2	1	4	1	1	3	2	3	3	2	2	1	1	1	2	2	2	2	2	1	2	2	2	2	2	2	2	2	1	1	1	1	1	2	2	2	2	2	2	2	2	无	1.5	1.75	1.75	1.66667	2
632	1	3	2	1	4	1	1	5	2	1	4	1	1	1	1	1	1	1	1	1	1	1	1	1	1	1	1	1	1	1	1	1	1	1	1	1	1	1	1	1	1	1	1	不知道	1	1	1	1	1
633	2	2	5	1	3	3	1	1	1	1	4	5	5	4	5	4	4	4	4	4	4	3	3	4	4	4	4	4	4	4	4	4	4	4	4	4	5	4	5	4	4	3	3	无	4.75	4	3.5	4.08333	4
634	2	2	2	1	4	1	1	1	1	2	1	3	1	1	1	1	1	1	1	4	1	2	2	1	3	1	3	4	1	1	1	1	1	1	1	3	2	2	2	2	2	2	2	快点实习多实战 希望能多学点经验，不是课本上的东西	1.5	1	2.25	1.58333	2
635	2	2	2	1	4	1	1	1	2	1	1	6	5	5	5	4	4	4	5	5	4	5	5	4	4	4	5	7	4	4	4	4	5	4	6	4	5	5	5	5	5	5	5	无	5.25	4.25	4.75	4.75	4.25
636	2	2	2	1	4	1	1	3	1	1	4	4	1	1	4	2	2	3	2	3	5	5	4	4	2	3	3	6	3	3	3	2	2	2	2	4	4	3	3	3	3	4	3	无	2.5	2.25	4.25	3	3
637	1	1	5	1	4	3	2	1	1	1	4	6	6	6	6	6	6	6	6	6	6	6	6	6	6	6	6	6	6	6	6	6	6	6	6	6	6	6	6	6	6	6	6	无	6	6	6	6	6
638	1	2	1	1	4	1	1	5	2	2	1	5	5	5	5	5	5	5	5	5	5	5	5	5	5	5	5	5	5	5	5	5	5	5	5	5	5	5	5	5	5	5	5	无	5	5	5	5	5
639	1	3	2	1	4	2	1	5	2	3	1	2	2	3	4	2	3	4	4	3	3	2	4	3	2	3	5	3	4	4	4	3	4	4	5	4	4	5	6	6	5	5	4	无	2.75	3.25	3	3	3.25
640	1	2	1	1	4	2	1	5	2	3	1	5	5	5	5	5	5	5	5	5	5	5	5	5	5	5	5	5	5	5	5	5	5	5	5	5	5	5	5	5	5	5	5	无	5	5	5	5	5
641	2	2	2	1	4	2	2	3	2	1	4	4	3	4	4	3	4	4	4	4	4	4	4	4	5	4	5	5	4	4	4	3	4	3	5	5	5	4	5	4	5	6	5	无	3.75	3.75	4	3.83333	4.5
642	2	2	5	1	4	1	1	1	2	1	1	5	4	5	6	5	4	6	5	4	5	4	5	5	4	5	5	7	5	5	4	3	4	3	4	6	6	5	6	5	5	6	5	无	5	5	4.5	4.83333	4.75
643	2	2	2	1	2	2	3	1	1	2	1	4	4	4	4	4	4	4	4	4	4	4	4	6	6	6	6	6	6	5	4	3	5	6	5	4	4	3	4	5	5	5	5	无	4	4	4	4	6
644	2	2	2	1	4	1	1	2	2	2	1	7	5	6	6	6	6	7	6	6	6	6	6	6	6	6	6	7	7	5	5	7	5	5	5	3	5	5	6	5	5	6	5	无	6	6.25	6	6.08333	6
645	1	2	3	1	4	1	1	5	2	3	1	6	6	6	6	6	6	6	6	6	6	6	6	6	6	6	6	6	6	6	6	6	6	6	6	6	6	6	6	6	6	6	6	无	6	6	6	6	6
646	2	1	2	1	1	2	2	3	2	1	1	1	1	1	1	1	1	1	1	1	1	1	1	1	2	1	1	1	1	1	1	1	1	1	1	1	1	1	1	1	1	1	1	无	1	1	1	1	1.25
647	2	2	4	2	4	1	1	4	2	2	1	7	7	7	7	7	7	7	7	7	7	7	7	7	7	7	7	7	7	7	7	7	7	7	7	7	7	7	7	7	7	7	7	无	7	7	7	7	7
648	2	2	2	1	4	1	1	2	2	3	1	5	6	5	6	5	5	5	5	6	5	5	6	5	5	5	5	5	5	5	5	6	6	6	6	6	5	5	5	5	5	5	5	无	5.5	5	5.5	5.33333	5
649	1	1	1	1	2	2	2	1	1	1	1	7	7	7	7	7	7	7	7	7	7	7	7	7	7	7	7	7	7	7	7	7	7	7	7	7	7	7	7	7	7	7	7	无	7	7	7	7	7
650	2	2	2	1	2	3	3	2	2	1	1	7	7	7	7	7	7	7	7	7	7	7	7	7	7	7	7	7	7	7	7	7	7	7	7	7	7	7	7	7	7	6	7	无	7	7	7	7	7
651	2	1	3	1	2	3	3	1	2	1	3	7	7	7	7	7	7	7	7	7	7	7	7	7	7	7	7	6	7	6	6	5	6	7	7	7	7	7	7	7	7	7	7	学校层面给予我实战机会	7	7	7	7	7
652	2	2	2	1	4	1	1	3	2	2	1	4	4	4	4	4	4	4	4	4	4	4	4	4	4	4	4	4	4	4	4	4	4	4	4	4	4	4	4	4	4	4	4	无	4	4	4	4	4
653	2	2	5	1	4	1	1	1	2	2	1	7	2	2	7	6	2	6	6	7	7	2	7	7	2	5	7	4	7	3	3	2	7	2	5	4	3	2	5	2	2	7	2	暂无	4.5	5	5.75	5.08333	5.25
654	1	2	2	1	2	3	3	3	1	2	1	4	3	4	5	4	4	3	4	4	3	4	3	4	3	5	4	3	4	3	5	4	3	5	4	4	3	4	5	4	3	4	3	无	4	3.75	3.5	3.75	4
655	1	2	2	1	4	1	2	2	1	2	1	5	5	3	4	5	5	5	4	4	4	4	4	4	4	4	5	4	5	4	4	3	4	4	4	5	4	4	5	4	5	5	4	无	4.25	4.75	4	4.33333	4.25
656	1	2	2	1	4	1	1	4	2	2	1	5	6	6	5	4	5	4	5	7	6	5	5	6	7	6	6	6	5	7	6	5	5	7	5	5	7	6	5	5	6	7	5	无	5.5	4.5	5.75	5.25	6.25
657	1	2	2	1	4	2	2	2	2	2	1	5	5	5	5	5	5	5	5	5	4	5	5	5	4	5	5	5	5	5	5	5	4	5	4	5	4	5	4	4	5	5	5	无	5	5	4.75	4.91667	4.75
658	1	2	1	1	2	1	1	2	2	3	1	5	5	5	5	5	5	5	5	5	5	5	5	5	5	5	5	5	5	5	5	5	5	5	5	5	5	5	5	5	5	5	5	无	5	5	5	5	5
659	1	3	2	1	2	3	3	3	2	2	3	5	5	5	5	4	5	5	4	5	5	4	5	6	5	5	6	7	5	6	5	7	6	5	6	6	6	5	6	6	5	6	6	无	5	4.5	4.75	4.75	5.5
660	2	2	3	1	4	1	2	2	2	1	3	5	5	4	5	6	5	6	4	6	5	4	4	5	4	5	5	5	5	6	5	5	4	5	5	5	5	6	5	4	5	5	6	无	4.75	5.25	4.75	4.91667	4.75
661	1	1	1	2	1	4	4	1	1	1	1	5	5	6	5	5	5	6	6	5	5	6	5	4	5	5	4	3	5	5	4	3	3	5	5	4	4	5	5	4	4	5	5	无	5.25	5.5	5.25	5.33333	4.5
662	2	2	2	1	2	2	1	3	2	1	1	7	4	3	3	4	4	3	5	4	4	5	5	4	4	4	4	4	4	4	4	5	5	3	3	4	4	4	6	4	5	5	5	挺好的	4.25	4	4.5	4.25	4
663	1	2	2	1	3	3	3	4	1	1	1	6	7	5	6	6	5	6	6	6	6	6	5	7	6	7	5	7	6	6	6	6	7	6	6	6	6	6	6	7	7	7	7	无	6	5.75	5.75	5.83333	6.25
664	2	1	2	1	2	2	2	1	2	1	1	3	3	3	3	3	3	3	3	3	3	3	3	3	3	3	3	3	3	3	3	3	3	3	3	3	3	3	3	3	3	3	3	无	3	3	3	3	3
665	1	2	2	1	4	1	1	3	1	2	1	5	4	4	3	7	7	7	7	7	7	7	4	5	5	5	5	7	4	5	4	3	7	7	7	5	5	5	5	5	5	5	5	无	4	7	6.25	5.75	5
666	1	2	2	1	2	1	1	2	2	3	1	7	7	7	7	3	4	3	4	5	3	4	5	5	3	4	5	3	4	5	3	5	4	4	4	3	4	5	4	3	4	5	4	无	7	3.5	4.25	4.91667	4.25
667	1	2	1	1	2	2	2	5	2	2	4	5	5	5	5	5	5	5	5	5	5	5	5	5	5	5	5	5	5	5	5	5	5	5	5	5	5	5	5	5	5	5	5	暂无	5	5	5	5	5
668	1	2	5	1	4	1	1	2	1	1	3	7	6	5	7	4	4	6	5	6	6	5	4	5	5	5	6	5	5	6	5	6	5	4	5	5	7	7	7	6	5	5	5	无	6.25	4.75	5.25	5.41667	5.25
669	1	2	5	1	2	3	3	2	1	1	1	6	6	6	6	6	6	6	6	6	6	6	6	6	6	6	6	6	6	6	6	6	6	6	6	6	6	6	6	6	6	6	6	无	6	6	6	6	6
670	2	2	2	1	1	3	3	3	2	3	1	5	5	5	5	3	3	3	3	4	4	4	4	6	6	6	6	6	6	6	6	6	6	6	6	6	6	6	6	7	7	7	7	无	5	3	4	4	6
671	1	3	2	1	2	1	1	1	2	3	4	4	4	4	4	4	4	4	4	4	4	4	4	4	4	7	4	4	4	4	4	4	7	4	4	4	4	4	4	4	4	4	4	无	4	4	4	4	4.75
672	2	2	2	1	2	2	2	3	2	3	4	3	1	3	5	4	5	4	6	4	5	5	4	2	4	4	5	4	3	2	1	1	2	3	2	2	2	2	2	1	1	1	1	我学的是全媒体电商运营，现在都大二下学期了，感觉到现在都没接触过真正的专业课，能不能不要浪费时间了，唯一有个晚上的专业课还是直播，直播运营呢？	3	4.75	4.5	4.08333	3.75
673	1	2	3	1	2	1	1	1	1	1	1	4	4	4	4	4	4	4	4	4	4	4	4	4	4	4	4	4	4	4	4	4	4	4	4	4	4	4	4	4	4	4	4	无	4	4	4	4	4
674	2	2	5	1	3	2	1	2	2	1	1	7	7	7	7	7	7	7	7	7	7	7	7	7	7	7	7	7	7	7	7	7	7	7	7	7	7	7	7	7	7	7	7	无	7	7	7	7	7
675	1	2	5	1	2	2	2	3	2	2	1	7	7	1	7	7	7	7	4	7	7	7	7	7	7	7	7	7	7	7	7	7	7	7	7	7	7	7	7	7	7	7	7	无	5.5	6.25	7	6.25	7
676	2	2	2	1	4	1	2	2	1	1	1	5	7	4	6	4	4	5	4	4	6	6	6	5	7	6	6	7	4	5	5	6	4	5	7	6	6	7	7	6	6	5	6	无	5.5	4.25	5.5	5.08333	6
677	2	2	2	1	4	1	2	1	2	2	1	5	5	5	5	4	4	4	4	4	4	4	4	4	4	4	4	4	4	4	4	4	4	4	4	4	4	4	4	4	4	4	4	直播实操	5	4	4	4.33333	4
678	2	2	2	1	2	1	1	3	2	1	1	4	5	5	5	5	5	5	3	4	3	5	3	3	5	3	4	5	3	4	5	6	3	5	4	5	3	4	4	5	4	6	6	wu	4.75	4.5	3.75	4.33333	3.75
679	2	2	2	2	1	2	2	1	1	1	1	7	7	7	7	7	7	7	7	7	7	7	7	7	7	7	7	7	7	7	7	7	7	7	7	7	7	7	7	7	7	7	7	无	7	7	7	7	7
680	2	2	2	1	2	3	3	1	1	1	2	7	7	7	7	7	7	7	7	7	7	7	7	7	7	7	7	7	7	7	7	7	7	7	7	7	7	7	7	7	7	7	7	无	7	7	7	7	7
681	2	2	2	1	2	2	3	5	2	2	1	7	7	6	4	7	5	5	7	6	4	5	4	4	4	4	4	6	4	5	4	5	5	4	3	6	5	4	5	5	5	4	4	无	6	6	4.75	5.58333	4
682	2	1	1	1	4	1	1	5	1	1	1	7	7	7	7	7	7	7	4	4	4	4	4	4	4	4	4	4	4	4	4	4	4	4	4	4	4	4	4	4	4	4	4	🈚️	7	6.25	4	5.75	4
683	2	2	2	1	2	2	2	2	2	2	2	4	4	4	4	4	4	4	4	4	4	4	4	4	4	4	4	4	4	4	4	4	4	4	4	4	4	4	4	4	4	4	4	无	4	4	4	4	4
684	1	2	2	1	2	1	1	1	1	3	3	5	5	5	5	5	5	5	5	5	5	5	5	5	5	5	5	5	5	5	5	5	5	5	5	5	5	5	5	5	5	5	5	无	5	5	5	5	5
685	2	2	2	2	4	1	1	2	2	3	1	5	5	5	5	5	5	5	4	5	5	4	5	5	4	5	4	5	4	5	3	5	5	5	5	5	5	5	5	5	5	5	5	无	5	4.75	4.75	4.83333	4.5
686	1	3	2	1	3	2	2	3	2	3	1	4	4	4	4	4	4	4	4	4	4	4	4	4	4	4	4	4	4	4	4	4	4	4	4	4	4	4	4	4	4	4	4	无	4	4	4	4	4
687	1	2	2	1	1	3	3	5	2	2	3	7	5	5	5	6	4	5	5	4	5	4	5	5	5	5	5	5	5	4	5	4	6	4	6	5	4	5	5	5	5	5	5	目前暂无	5.5	5	4.5	5	5
688	1	2	2	1	2	2	1	5	2	3	4	3	2	2	2	3	3	4	4	3	4	3	4	4	5	4	4	3	4	5	3	3	5	4	4	5	3	4	5	4	4	3	4	无	2.25	3.5	3.5	3.08333	4.25
689	1	2	2	1	2	1	1	3	1	2	4	5	5	5	5	5	5	5	5	5	5	5	5	5	4	5	6	5	5	4	5	5	4	5	6	5	5	4	5	5	5	5	6	多实践	5	5	5	5	5
690	1	1	1	1	3	1	1	5	2	2	4	3	3	3	3	3	3	3	3	3	3	3	3	3	3	3	3	3	3	3	3	3	3	3	3	3	3	3	3	3	3	3	3	无	3	3	3	3	3
691	2	2	2	1	4	2	2	3	2	1	4	3	3	3	3	4	5	4	4	7	7	7	7	7	6	5	5	7	4	4	4	5	5	5	5	4	5	5	7	7	7	7	7	职业规划	3	4.25	7	4.75	5.75
692	2	2	5	1	3	1	1	1	1	1	1	4	5	4	4	4	2	5	4	5	4	4	6	5	6	6	6	5	5	5	5	5	5	5	5	6	5	5	6	5	5	6	6	无	4.25	3.75	4.75	4.25	5.75
693	2	2	2	1	3	1	1	3	1	1	1	7	7	7	6	5	5	5	5	5	5	5	5	6	6	6	6	6	6	6	6	6	6	6	6	4	3	3	3	4	4	3	4	无	6.75	5	5	5.58333	6
694	2	2	2	1	3	1	1	1	2	3	3	2	2	3	5	3	3	6	2	4	4	4	4	4	4	4	4	4	4	4	4	4	4	4	3	4	5	4	4	4	3	4	4	有老师单纯念老旧ppt，上课收获不多，可以多课外实践	3	3.5	4	3.5	4
695	2	2	2	1	3	3	3	3	2	1	4	6	6	6	6	6	6	6	6	6	6	6	6	6	6	6	6	6	6	6	7	7	7	7	7	7	7	7	7	7	7	7	7	无	6	6	6	6	6
696	2	3	2	1	4	3	2	1	1	1	1	7	4	7	5	6	6	6	6	6	6	6	6	6	5	6	6	6	6	6	5	5	6	6	6	6	5	5	5	6	6	5	6	无	5.75	6	6	5.91667	5.75
697	2	2	2	1	4	1	1	5	2	2	1	4	5	4	5	3	3	5	5	5	5	6	5	6	6	7	7	7	4	7	6	3	6	3	5	5	6	7	7	5	5	5	6	无	4.5	4	5.25	4.58333	6.5
698	1	2	3	1	4	1	1	5	2	2	2	2	4	4	2	4	2	4	4	2	4	4	4	4	2	4	2	4	2	4	2	4	3	4	3	4	2	4	3	4	4	4	4	无	3	3.5	3.5	3.33333	3
699	2	2	2	1	4	1	1	2	1	2	1	4	2	4	4	4	4	4	4	5	3	4	4	4	2	4	4	5	4	4	3	3	5	5	5	5	5	5	5	4	3	4	4	出去实习 多进行实操 而不是空讲	3.5	4	4	3.83333	3.5
700	2	2	2	1	4	1	1	3	1	3	1	2	1	1	6	1	1	7	1	1	1	1	2	4	2	1	2	2	1	2	1	1	1	1	1	1	1	1	3	2	2	2	2	无	2.5	2.5	1.25	2.08333	2.25
701	2	2	2	1	1	2	2	1	1	1	1	6	6	6	6	6	6	6	6	6	6	6	6	6	6	6	6	6	6	6	6	6	6	6	6	6	6	6	6	6	6	6	6	无	6	6	6	6	6
702	2	2	3	1	4	2	2	1	1	1	3	5	5	5	5	4	4	4	4	5	5	5	5	5	5	5	5	5	5	5	5	4	4	4	4	5	5	5	5	5	5	5	5	无	5	4	5	4.66667	5
703	1	2	1	1	2	1	1	1	2	3	1	5	6	5	6	5	6	5	6	5	6	5	6	5	6	5	6	5	6	5	6	5	6	5	6	5	6	5	6	5	6	5	6	教学与未来实际工作所需要不符	5.5	5.5	5.5	5.5	5.5
704	1	2	2	1	2	3	1	1	2	1	3	7	7	7	7	6	6	6	6	6	6	6	6	6	6	6	6	6	6	6	6	6	6	6	6	6	6	6	6	6	6	6	6	无	7	6	6	6.33333	6
705	2	2	2	1	4	1	1	3	2	3	4	4	4	4	4	4	4	4	4	4	4	4	4	4	4	4	4	4	4	4	4	4	4	4	4	1	1	1	1	4	4	4	4	无	4	4	4	4	4
706	2	1	5	1	2	2	2	1	1	1	4	6	6	6	6	6	6	6	6	6	6	6	6	6	6	6	6	6	6	6	6	6	6	6	6	6	6	6	6	6	6	6	6	无	6	6	6	6	6
707	1	2	1	1	3	1	1	3	2	1	1	7	7	7	7	7	7	7	7	7	7	7	7	7	7	7	7	7	7	7	7	7	7	7	7	7	7	7	7	7	7	7	7	。	7	7	7	7	7
708	2	3	2	1	3	1	2	2	2	1	1	7	4	6	6	5	6	7	7	6	5	6	7	5	5	5	5	7	7	7	5	1	7	4	5	6	6	6	6	6	6	6	6	无	5.75	6.25	6	6	5
709	2	1	5	1	3	2	2	3	2	3	1	4	4	4	4	4	4	4	4	4	4	4	4	4	4	4	4	4	4	4	4	4	4	4	4	3	4	4	4	4	4	4	4	无	4	4	4	4	4
710	2	2	2	1	4	2	1	3	2	2	1	7	7	4	1	4	4	4	4	6	5	4	5	3	4	3	3	3	3	3	3	2	2	2	2	2	2	2	2	2	2	2	2	无	4.75	4	5	4.58333	3.25
711	2	3	2	1	4	1	1	3	2	2	4	2	2	2	2	4	4	4	4	4	4	4	4	4	4	4	4	4	4	4	4	4	4	4	4	4	4	4	4	4	4	4	4	无	2	4	4	3.33333	4
712	2	2	3	1	4	2	2	1	2	1	3	6	6	5	5	5	5	5	5	5	5	5	5	5	5	5	5	5	5	5	5	5	5	5	5	5	5	5	5	5	5	5	5	无	5.5	5	5	5.16667	5
713	2	2	2	1	1	1	1	1	2	1	3	7	7	7	7	7	7	7	7	7	7	7	7	7	7	7	7	7	7	7	7	7	7	7	7	7	7	7	7	7	7	7	7	希望学校可以提供相关实习工作	7	7	7	7	7
714	2	1	5	2	4	1	1	1	2	3	4	7	7	7	7	7	7	7	7	7	7	7	7	7	7	7	7	7	7	7	7	7	7	7	7	7	7	7	7	7	7	7	7	无	7	7	7	7	7
715	2	2	2	1	1	1	1	1	1	1	1	7	7	7	7	7	7	7	7	7	7	7	7	7	7	7	7	7	7	7	7	7	7	7	7	7	7	7	7	7	7	7	7	无	7	7	7	7	7
716	2	3	2	1	4	1	1	2	1	2	1	7	7	7	7	7	7	7	7	7	7	7	7	7	7	7	7	7	7	7	7	7	7	7	7	7	7	7	7	7	7	7	7	无	7	7	7	7	7
717	1	2	1	1	4	1	1	5	2	3	1	1	4	1	3	3	3	3	3	3	3	3	3	3	3	3	3	3	3	3	3	3	3	3	3	7	7	7	7	4	4	4	4	无	2.25	3	3	2.75	3
718	1	2	3	1	2	3	3	5	1	2	1	6	7	7	5	6	5	6	7	6	5	6	5	7	6	6	6	7	6	7	6	6	5	6	6	6	5	5	5	6	6	5	5	无	6.25	6	5.5	5.91667	6.25
719	1	1	1	1	1	3	1	3	2	3	4	4	4	4	4	4	4	4	4	4	4	4	4	4	4	4	4	4	4	4	4	4	4	4	4	4	4	4	4	4	4	4	4	对的对的	4	4	4	4	4
720	2	2	2	2	4	1	1	1	1	1	1	6	6	6	6	6	6	6	6	6	6	6	6	6	6	6	6	6	6	6	6	6	6	6	6	6	6	6	6	6	6	6	6	无	6	6	6	6	6
721	2	3	2	1	4	2	1	2	2	2	2	4	4	4	4	4	4	4	4	4	4	4	4	4	4	4	4	4	4	4	4	4	4	4	4	4	4	4	4	4	4	4	4	没有建议	4	4	4	4	4
722	2	2	2	1	4	2	1	5	2	3	1	4	4	4	4	4	4	4	4	4	4	4	4	4	4	4	4	4	4	4	4	4	4	4	4	4	4	4	4	4	4	4	4	无	4	4	4	4	4
723	2	2	2	1	2	2	2	1	1	3	1	7	4	5	4	5	4	4	4	4	4	4	6	4	4	4	4	4	4	4	4	4	4	4	4	4	4	4	4	4	4	4	4	无	5	4.25	4.5	4.58333	4
724	2	1	2	1	2	1	2	1	1	1	1	7	3	4	7	7	7	4	6	3	3	3	5	4	2	1	3	4	7	4	3	1	6	2	2	3	3	2	2	2	2	4	5	无	5.25	6	3.5	4.91667	2.5
725	1	1	3	1	1	3	2	3	2	1	1	4	4	4	4	4	4	4	4	4	4	4	4	4	4	4	4	4	4	4	4	4	4	4	4	4	4	4	4	4	4	4	4	无	4	4	4	4	4
726	2	2	2	1	4	2	1	1	2	2	1	7	7	7	7	7	7	7	7	7	7	7	7	7	7	7	7	7	7	7	7	7	7	7	7	7	7	7	7	7	7	7	7	无	7	7	7	7	7
727	2	1	5	1	3	1	1	1	2	1	1	3	4	4	4	4	4	4	4	4	4	4	4	4	4	4	4	6	5	5	4	4	4	4	4	5	4	4	4	4	4	4	4	无	3.75	4	4	3.91667	4
728	1	1	2	1	4	1	1	4	2	2	1	2	2	6	7	5	3	4	6	5	5	5	5	5	6	7	6	4	5	5	4	4	5	5	5	3	1	1	2	6	6	6	5	无	4.25	4.5	5	4.58333	6
729	1	3	2	1	4	1	1	4	2	3	1	7	7	7	7	6	6	6	6	6	6	6	6	6	6	6	6	6	6	6	6	6	6	6	6	6	6	6	6	6	6	6	6	净整些没用的	7	6	6	6.33333	6
730	2	2	2	1	4	1	1	4	2	1	1	4	4	4	4	4	4	4	4	4	4	4	4	4	4	4	4	4	4	4	4	4	4	4	4	4	4	4	4	4	4	4	4	无	4	4	4	4	4
731	1	2	1	1	4	1	1	2	2	2	1	4	3	5	4	2	2	2	4	2	4	4	4	4	4	4	4	4	4	4	4	4	4	4	4	4	4	4	4	4	4	4	4	无	4	2.5	3.5	3.33333	4
732	2	2	2	1	4	2	1	2	2	3	1	2	2	2	2	2	2	2	2	2	2	2	2	2	2	2	2	2	2	2	2	2	2	2	2	2	2	2	2	2	2	2	2	。	2	2	2	2	2
733	2	3	5	1	4	2	2	3	1	2	1	4	4	4	4	4	4	4	4	4	4	4	4	4	4	4	4	4	4	4	4	4	4	4	4	4	4	4	4	4	4	4	4	无	4	4	4	4	4
734	2	2	2	1	4	1	1	3	2	2	1	5	5	5	5	4	5	4	4	4	4	3	3	4	4	5	4	6	4	5	4	4	5	4	5	5	5	5	6	5	5	4	5	增加点实训课程	5	4.25	3.5	4.25	4.25
735	2	2	2	1	4	2	1	3	2	3	1	7	7	6	5	3	2	5	5	4	5	6	7	6	6	6	5	6	5	6	5	4	5	5	6	5	5	5	5	5	5	5	4	无	6.25	3.75	5.5	5.16667	5.75
736	2	2	5	1	4	2	2	2	1	1	1	5	5	5	5	5	7	7	6	5	5	5	5	6	6	6	7	7	7	7	7	7	7	7	7	7	7	7	7	7	7	7	7	一	5	6.25	5	5.41667	6.25
737	1	3	2	1	1	2	2	3	2	1	1	7	7	7	7	7	7	7	7	7	7	7	7	7	7	7	7	7	7	7	7	7	7	7	7	7	7	7	7	7	7	7	7	哦	7	7	7	7	7
738	1	2	1	1	4	1	1	5	2	3	1	4	4	4	4	4	4	4	4	4	4	4	4	4	4	4	4	4	4	4	4	5	4	4	4	4	4	4	4	4	5	4	4	无	4	4	4	4	4
739	1	3	2	1	2	1	1	1	1	1	1	6	6	6	6	6	6	6	6	6	6	6	6	6	6	6	6	6	6	6	6	6	6	6	6	6	6	6	6	6	6	6	6	6	6	6	6	6	6
740	1	2	5	1	3	1	2	5	1	1	4	5	5	5	5	5	5	5	5	5	5	5	5	5	5	5	5	5	5	5	5	5	5	5	5	5	5	5	5	5	5	5	5	无	5	5	5	5	5
741	2	2	1	2	2	2	2	2	2	2	2	7	7	7	7	7	7	7	7	7	7	7	7	7	7	7	7	7	7	7	7	7	7	7	7	7	7	7	7	7	7	7	7	无	7	7	7	7	7
742	1	3	2	1	3	4	4	2	2	1	4	7	2	2	6	6	1	6	2	2	2	5	4	4	4	4	4	4	4	4	4	5	3	3	4	2	2	2	2	2	5	2	6	无	4.25	3.75	3.25	3.75	4
743	2	1	5	1	3	2	2	4	2	3	3	1	6	5	1	6	6	4	1	6	5	1	6	5	5	5	2	6	6	5	5	6	5	4	5	6	5	1	1	6	5	1	1	哈哈	3.25	4.25	4.5	4	4.25
744	2	1	2	1	2	1	1	3	2	2	1	5	4	3	3	3	3	3	3	3	3	3	3	3	4	4	4	4	3	2	3	3	3	3	3	5	6	6	6	5	5	5	5	无	3.75	3	3	3.25	3.75
745	1	3	2	2	2	4	4	4	1	1	1	6	6	6	7	7	5	5	6	5	6	5	6	5	6	5	6	6	5	6	5	5	6	5	6	6	5	6	5	6	5	6	5	无	6.25	5.75	5.5	5.83333	5.5
746	1	2	3	1	2	4	4	1	2	1	3	7	7	7	7	7	7	7	7	7	7	7	7	7	7	7	7	7	7	7	7	7	7	7	7	7	7	7	7	7	7	7	7	无	7	7	7	7	7
747	1	2	3	1	2	2	2	4	1	1	1	7	7	7	7	7	7	7	7	7	7	7	7	7	7	7	7	7	7	7	7	7	7	7	7	7	7	7	7	7	7	7	7	无	7	7	7	7	7
748	1	3	2	1	4	1	1	5	1	1	1	7	7	7	7	7	7	7	7	7	7	7	7	7	7	7	7	6	6	6	6	6	7	7	7	7	7	7	7	7	7	7	7	无	7	7	7	7	7
749	2	2	2	1	2	1	1	2	1	1	3	7	7	7	7	7	7	7	7	7	7	7	5	4	4	4	4	4	4	4	5	6	5	6	5	6	6	7	6	7	6	5	7	无	7	7	6.5	6.83333	4
750	1	3	5	1	4	1	1	4	1	2	1	5	6	5	6	4	5	4	5	5	5	3	5	4	4	6	5	5	5	4	3	3	5	4	3	5	6	5	5	3	4	4	3	没什么建议	5.5	4.5	4.5	4.83333	4.75
751	2	2	1	1	2	1	1	3	1	1	1	5	5	5	6	5	5	5	5	5	5	5	5	5	5	5	5	4	4	4	4	4	4	4	4	5	5	5	5	6	6	6	6	无	5.25	5	5	5.08333	5
752	2	2	3	1	3	1	1	2	2	2	1	5	5	6	5	5	6	6	6	5	6	5	5	6	6	5	6	6	5	5	5	4	5	4	5	5	5	5	5	6	5	5	5	无	5.25	5.75	5.25	5.41667	5.75
753	1	3	2	1	4	1	1	2	1	2	1	4	4	4	4	4	4	4	4	4	4	4	4	4	4	4	4	4	4	4	4	4	4	4	4	4	4	4	4	4	4	4	4	无	4	4	4	4	4
754	2	2	2	1	4	1	1	4	2	3	4	2	2	2	2	2	2	3	4	4	3	4	4	2	2	3	4	3	4	4	3	2	3	2	3	2	3	4	4	3	3	4	4	无	2	2.75	3.75	2.83333	2.75
755	2	2	5	2	3	2	2	1	1	1	3	6	6	6	6	6	6	6	5	6	6	6	6	6	6	6	6	6	6	6	6	6	6	7	6	6	6	6	6	6	6	6	6	无	6	5.75	6	5.91667	6
756	1	1	1	1	2	1	1	3	2	2	1	6	6	6	6	6	6	6	6	6	6	6	6	6	6	6	6	6	6	6	6	6	6	6	6	6	6	6	6	6	6	6	6	无	6	6	6	6	6
757	2	3	2	1	4	1	3	5	2	1	1	2	3	5	4	4	3	4	4	5	5	4	4	4	3	4	4	4	3	4	4	3	5	4	3	4	4	4	4	5	4	4	4	无	3.5	3.75	4.5	3.91667	3.75
758	1	1	1	2	2	1	1	4	1	2	1	3	3	3	3	3	3	3	3	3	3	3	3	3	2	3	2	2	2	2	2	2	2	2	4	2	2	3	5	2	1	2	2	大一不明确	3	3	3	3	2.5
759	1	1	1	1	4	2	1	1	2	2	1	7	7	7	7	7	7	7	7	7	7	7	7	7	7	7	7	7	7	7	7	7	7	7	7	7	7	7	7	7	7	7	7	无	7	7	7	7	7
760	2	2	2	1	3	1	1	1	2	3	1	6	4	3	3	3	3	4	3	5	4	3	3	3	3	5	5	4	4	4	4	3	6	6	4	4	4	4	5	4	4	4	4	没有实践	4	3.25	3.75	3.66667	4
761	2	1	2	1	4	2	2	2	2	3	1	5	5	5	5	5	5	5	5	5	5	5	5	5	5	5	5	5	5	5	5	5	5	5	5	5	5	5	5	5	5	5	5	无	5	5	5	5	5
762	2	1	2	1	2	2	1	1	1	1	3	5	7	3	3	5	5	5	4	5	5	5	5	3	3	4	5	5	5	5	5	5	5	5	5	5	5	4	5	5	3	6	6	无	4.5	4.75	5	4.75	3.75
763	1	1	5	1	4	1	2	3	2	2	1	7	7	7	7	7	7	7	7	7	7	7	7	7	7	7	7	7	7	7	7	7	7	7	7	7	7	7	7	7	7	7	7	无	7	7	7	7	7
764	2	1	1	1	1	2	2	2	2	1	1	4	4	4	4	4	4	4	4	4	4	4	4	4	4	4	4	4	4	4	4	4	4	4	4	4	4	4	4	4	4	4	4	无	4	4	4	4	4
765	1	3	1	2	2	2	2	3	2	2	1	7	4	4	4	4	4	4	4	4	4	4	4	4	4	4	4	4	4	4	4	4	4	4	4	4	4	4	4	4	4	4	4	无	4.75	4	4	4.25	4
767	2	1	2	1	2	2	1	2	1	1	1	5	5	5	5	5	5	5	5	5	5	5	5	5	5	5	5	5	5	5	5	5	5	5	5	5	7	5	5	5	5	5	5	无	5	5	5	5	5
768	2	1	5	1	4	1	1	1	2	2	1	7	7	7	7	7	7	7	7	7	7	7	7	7	7	7	7	7	7	7	7	7	7	7	7	7	7	7	7	7	7	7	7	无	7	7	7	7	7
769	2	1	2	1	2	1	1	1	2	1	1	7	5	7	7	7	7	7	7	7	7	7	7	7	7	7	7	7	7	7	7	7	7	7	7	7	7	7	7	7	7	7	7	无	6.5	7	7	6.83333	7
770	2	1	2	1	4	1	1	5	2	1	1	3	3	3	3	3	3	3	3	3	3	3	3	3	3	3	3	3	3	3	2	3	3	3	3	3	3	3	3	3	3	3	3	无	3	3	3	3	3
771	2	1	2	1	4	1	1	1	2	1	1	7	6	6	6	6	6	6	6	7	7	7	7	7	7	7	7	7	7	7	7	7	7	5	7	7	7	7	7	7	7	7	7	无	6.25	6	7	6.41667	7
772	1	1	1	1	2	2	2	1	1	2	1	4	4	4	4	4	4	4	4	4	4	4	4	4	4	4	4	4	4	4	4	4	4	4	4	4	4	4	4	4	4	4	4	无	4	4	4	4	4
773	1	1	1	2	2	4	4	4	2	2	2	7	6	7	6	5	5	6	7	6	4	5	5	7	5	3	5	6	5	5	6	6	6	5	5	6	5	5	6	1	7	7	1	物	6.5	5.75	5	5.75	5
774	2	1	1	1	1	1	1	1	2	1	1	4	4	4	4	4	4	4	4	4	4	4	4	4	4	4	4	4	4	4	4	4	4	4	4	4	4	4	4	4	4	4	4	无	4	4	4	4	4
775	2	2	2	1	4	1	1	1	2	1	1	7	7	7	7	6	6	6	6	5	5	5	5	4	4	4	4	7	6	5	4	4	7	5	7	2	1	1	1	2	3	3	3	无	7	6	5	6	4
776	2	2	2	1	4	1	1	3	2	1	3	7	3	7	7	7	7	7	7	7	7	7	7	7	2	7	7	7	7	7	7	7	7	7	7	7	7	7	7	7	7	7	7	无	6	7	7	6.66667	5.75
777	1	2	2	2	4	2	1	1	2	2	1	7	7	7	7	7	7	7	7	7	7	7	7	7	7	7	7	7	7	7	7	7	7	7	7	7	7	7	7	7	7	7	7	实习	7	7	7	7	7
778	2	1	5	1	4	1	1	5	2	1	1	7	7	7	7	7	7	7	7	7	7	6	7	5	5	6	6	7	4	7	5	5	6	6	7	7	7	7	7	7	6	6	3	无	7	7	6.75	6.91667	5.5
779	2	4	2	1	2	2	1	3	1	1	3	5	5	5	6	6	6	6	4	5	4	4	5	6	6	6	6	6	4	5	5	5	4	4	5	6	6	6	6	5	4	5	5	暂无	5.25	5.5	4.5	5.08333	6
780	2	4	5	2	4	4	4	5	2	3	3	7	7	7	7	7	7	7	7	7	7	7	7	7	7	7	7	7	7	7	7	7	7	7	7	7	7	7	7	7	7	7	7	无	7	7	7	7	7
781	2	4	2	1	4	1	1	2	2	2	3	5	5	5	6	5	6	5	4	3	4	4	5	5	4	4	5	6	5	6	6	6	6	6	6	6	6	6	6	6	6	6	6	无	5.25	5	4	4.75	4.5
782	2	2	1	1	1	1	1	1	1	1	1	7	7	7	7	7	7	7	7	7	7	7	7	7	7	7	7	7	7	7	7	7	7	7	7	7	7	7	7	7	6	7	7	无	7	7	7	7	7
783	2	1	5	1	4	2	1	3	2	3	1	7	7	7	7	7	7	7	7	7	7	7	7	7	7	7	7	7	7	7	7	7	7	7	7	7	7	7	7	7	7	7	7	无	7	7	7	7	7
784	2	4	2	1	2	2	1	1	1	1	3	7	6	4	6	5	5	5	4	5	6	6	7	7	6	6	5	6	7	7	7	6	5	6	7	6	7	5	6	7	7	6	7	无	5.75	4.75	6	5.5	6
785	1	1	5	1	2	2	1	2	2	1	1	7	7	7	7	7	7	7	7	7	7	7	7	7	7	7	7	7	7	7	7	7	7	7	7	7	7	7	7	7	7	7	7	无	7	7	7	7	7
786	2	1	3	1	4	1	1	1	1	1	4	7	7	7	7	7	7	7	7	7	7	7	7	7	7	7	7	7	7	7	7	7	7	7	7	7	7	7	7	7	7	7	7	有所帮助	7	7	7	7	7
787	1	2	1	1	4	1	1	1	1	3	1	3	3	3	3	2	2	2	2	2	2	2	2	2	2	2	2	2	2	2	2	2	2	2	2	2	2	2	2	2	2	2	2	无	3	2	2	2.33333	2
788	2	4	2	1	4	1	1	2	2	2	2	5	6	5	5	6	6	5	5	5	5	5	6	6	5	5	6	7	5	5	5	5	6	6	7	6	6	6	6	5	5	5	5	希望多些实践活动	5.25	5.5	5.25	5.33333	5.5
789	2	3	2	1	4	1	1	2	2	1	1	6	6	6	5	5	5	6	6	6	6	6	6	6	6	6	6	6	6	6	6	6	6	6	6	7	6	7	6	7	6	7	6	无	5.75	5.5	6	5.75	6
790	2	3	2	1	4	1	1	3	2	3	1	6	6	6	5	6	7	7	6	6	6	6	7	6	6	6	7	6	6	6	6	7	6	6	6	6	6	7	6	6	7	6	6	没有	5.75	6.5	6.25	6.16667	6.25
791	1	1	5	1	2	2	2	3	2	3	4	4	2	2	2	5	5	5	4	5	4	4	4	3	4	5	4	4	3	4	5	3	4	5	6	4	4	4	4	4	4	4	4	无	2.5	4.75	4.25	3.83333	4
792	2	3	2	1	4	3	2	3	2	1	3	5	5	5	4	5	5	5	6	6	5	6	4	5	6	5	5	5	5	5	5	5	5	5	5	6	5	6	5	6	5	6	5	没有	4.75	5.25	5.25	5.08333	5.25
793	1	2	2	1	4	1	1	4	2	2	1	5	5	5	5	5	5	5	5	5	5	5	5	5	5	5	5	5	5	5	5	5	5	5	5	5	5	5	5	5	5	5	5	无	5	5	5	5	5
794	2	1	2	1	2	2	1	1	2	2	4	4	4	4	4	2	3	4	4	6	6	4	4	7	7	6	7	7	7	7	7	7	7	7	7	7	7	7	7	7	7	7	7	无	4	3.25	5	4.08333	6.75
795	1	1	1	1	3	2	2	5	2	2	4	2	2	2	2	2	2	2	2	2	2	2	2	2	3	3	2	2	3	3	2	2	2	2	3	2	3	3	2	2	3	3	2	很好	2	2	2	2	2.5
796	1	1	1	1	2	3	1	5	2	2	1	4	4	4	4	4	4	4	4	4	4	4	4	4	4	4	4	4	4	4	4	4	4	4	4	4	4	4	4	4	4	4	4	无	4	4	4	4	4
797	2	4	2	1	2	1	1	1	2	3	1	6	6	7	6	6	6	6	6	7	7	6	7	6	7	6	7	6	7	7	6	7	7	7	7	7	7	7	7	7	7	7	7	无	6.25	6	6.75	6.33333	6.5
798	2	2	2	1	2	2	2	2	2	1	1	5	5	5	5	5	5	5	5	5	5	5	5	5	5	5	5	5	5	5	5	5	5	5	5	5	5	5	5	5	5	5	5	无	5	5	5	5	5
799	1	1	5	2	2	1	1	1	2	2	4	2	2	4	4	5	4	2	3	4	4	5	4	4	5	3	5	4	3	5	5	3	4	4	3	4	4	5	5	4	5	4	3	无	3	3.5	4.25	3.58333	4.25
800	2	1	3	1	2	3	3	1	2	1	4	7	7	7	7	7	7	7	7	7	7	7	7	7	7	7	7	7	7	7	7	7	7	7	7	7	7	7	7	7	7	7	7	无	7	7	7	7	7
801	2	2	2	1	2	2	2	1	1	2	1	4	4	4	4	4	4	4	4	4	4	4	4	4	4	4	4	4	4	4	4	4	4	4	4	4	4	4	4	4	4	4	4	无	4	4	4	4	4
802	2	2	2	1	4	2	2	1	2	1	1	4	4	4	4	4	4	4	4	4	4	4	4	4	4	4	4	4	4	4	4	4	4	4	4	4	4	4	4	4	4	4	4	无	4	4	4	4	4
803	1	1	1	1	2	3	3	1	2	1	2	5	4	6	6	6	6	6	6	6	6	6	6	6	6	6	6	6	6	6	6	6	6	6	6	6	6	6	6	6	6	6	7	无	5.25	6	6	5.75	6
804	2	3	2	1	2	1	1	3	1	2	1	2	2	2	2	2	2	3	3	6	5	5	5	4	4	4	5	4	6	6	7	7	4	6	5	5	5	5	5	5	6	4	5	没	2	2.5	5.25	3.25	4.25
805	2	1	3	1	3	2	1	1	2	2	1	3	2	4	3	4	4	4	4	3	4	4	4	4	4	4	4	4	3	4	4	2	3	2	3	4	3	4	4	5	4	4	4	无	3	4	3.75	3.58333	4
806	2	2	2	1	2	3	3	2	2	2	1	3	3	3	3	3	3	3	3	3	3	3	3	3	3	3	3	3	3	3	3	3	3	3	3	3	3	3	3	3	3	3	3	无	3	3	3	3	3
807	2	2	2	1	2	1	1	3	2	1	4	7	7	7	7	7	6	6	5	7	6	6	6	6	7	6	7	7	6	7	6	6	6	6	6	6	6	6	6	7	6	6	7	无	7	6	6.25	6.41667	6.5
808	2	1	5	1	1	1	1	4	2	2	4	7	7	7	7	7	7	7	7	7	7	7	7	7	7	7	7	7	7	7	7	7	7	7	7	7	7	7	7	7	7	7	7	无	7	7	7	7	7
809	1	1	1	1	1	2	1	5	2	3	1	7	7	7	7	4	4	4	4	4	4	4	4	4	4	4	4	4	4	4	4	4	4	4	4	4	4	4	4	4	4	4	4	0	7	4	4	5	4
810	1	1	3	1	2	3	3	1	1	3	4	5	5	5	5	5	5	5	5	5	5	5	5	5	5	5	5	5	5	5	5	5	5	5	5	5	5	5	5	5	5	5	5	无	5	5	5	5	5
811	2	1	5	2	2	1	1	2	2	1	4	6	5	4	4	4	6	6	4	5	6	4	6	5	6	4	6	5	6	4	6	5	6	5	6	6	5	6	6	5	5	6	5	无	4.75	5	5.25	5	5.25
812	2	1	5	2	2	1	1	1	1	1	4	6	6	6	6	6	6	6	6	6	6	6	6	6	5	6	5	5	6	5	6	5	6	5	7	5	4	6	4	6	5	6	5	无	6	6	6	6	5.5
813	2	1	3	2	2	2	2	3	1	1	3	6	6	6	6	6	6	6	6	6	6	5	5	5	4	5	6	6	6	6	6	6	6	5	6	6	4	6	5	5	6	6	6	无	6	6	5.5	5.83333	5
814	2	1	2	1	2	3	2	1	1	1	1	6	2	6	7	4	4	4	5	6	6	6	6	6	6	6	6	6	6	6	6	6	6	6	6	6	6	6	6	6	6	6	6	无	5.25	4.25	6	5.16667	6
815	2	1	5	1	1	1	1	1	1	1	4	7	7	7	7	7	7	7	7	7	7	7	7	7	7	7	7	7	7	7	7	7	7	7	7	7	7	7	7	7	7	7	7	无	7	7	7	7	7
816	1	2	2	1	4	2	1	3	2	3	4	4	4	4	7	4	4	4	4	2	6	2	6	5	5	5	5	6	5	5	5	2	6	2	2	6	6	6	6	5	5	5	5	无	4.75	4	4	4.25	5
817	2	1	2	1	2	3	3	1	1	1	1	4	4	4	4	4	4	4	4	4	4	4	4	4	4	4	4	4	4	4	4	4	4	4	4	4	4	4	4	4	4	4	4	无	4	4	4	4	4
818	2	1	2	1	4	1	2	1	1	1	1	7	7	7	7	7	7	7	7	7	7	7	7	7	7	7	7	7	7	7	7	7	7	7	7	7	7	7	7	7	7	7	7	无	7	7	7	7	7
819	2	1	2	1	3	1	1	3	2	1	1	7	4	4	4	4	4	4	4	4	4	4	4	4	4	4	4	4	4	4	4	4	4	4	4	4	4	4	4	4	4	4	4	无	4.75	4	4	4.25	4
820	2	3	5	1	4	1	1	4	2	2	4	2	1	2	2	1	2	1	2	2	1	1	2	2	1	1	2	2	1	2	2	2	2	1	2	2	2	2	2	2	2	2	2	无	1.75	1.5	1.5	1.58333	1.5
821	2	1	1	1	3	1	1	4	1	1	4	3	3	3	3	3	3	3	3	3	3	3	3	3	3	3	3	3	3	3	3	3	3	3	3	3	3	3	3	3	3	3	3	无	3	3	3	3	3
822	2	3	2	1	4	1	1	2	2	1	2	5	4	5	5	5	5	6	5	5	6	5	6	5	5	5	5	5	5	5	5	5	5	5	5	5	5	5	5	5	5	5	5	无	4.75	5.25	5.5	5.16667	5
823	2	1	5	1	2	2	2	2	1	1	1	5	6	5	6	5	6	5	6	5	6	5	6	5	6	5	6	5	6	5	6	5	6	5	6	5	6	5	6	5	6	5	6	无	5.5	5.5	5.5	5.5	5.5
824	2	1	2	1	2	2	2	1	1	1	1	5	5	6	6	5	5	5	5	6	6	6	6	6	6	6	5	6	6	6	6	6	6	6	6	6	6	5	6	6	6	6	6	无	5.5	5	6	5.5	5.75
825	2	1	5	1	4	1	1	2	2	2	4	3	3	3	3	3	3	3	3	3	3	3	3	3	3	3	3	3	3	3	3	3	3	3	3	3	3	3	3	3	3	3	3	没有意见	3	3	3	3	3
826	2	3	2	1	3	1	1	2	2	2	1	3	3	3	3	3	3	4	4	4	4	4	4	4	4	4	4	4	4	4	4	4	4	4	4	4	4	4	4	4	4	4	4	没有	3	3.5	4	3.5	4
827	1	1	3	2	4	1	1	3	1	2	1	7	7	7	7	7	7	7	7	7	7	7	7	7	7	7	7	7	7	7	7	7	7	7	7	7	7	7	7	7	7	7	7	无	7	7	7	7	7
828	1	1	1	1	4	1	1	1	1	3	1	5	2	2	2	4	3	3	3	5	4	4	4	3	3	3	3	4	4	4	4	2	4	4	4	4	4	4	3	3	3	3	5	多讲讲与就业有关的内容和一些项目	2.75	3.25	4.25	3.41667	3
829	2	1	5	1	2	2	3	1	2	1	4	5	3	5	5	5	5	5	5	5	5	5	5	5	5	5	5	6	5	6	3	2	4	5	6	5	5	5	5	5	5	5	5	挺好的 比较有前景	4.5	5	5	4.83333	5
830	2	1	3	1	2	4	4	1	2	1	4	7	7	7	7	7	7	7	7	7	7	7	7	7	7	7	7	7	7	7	7	7	7	7	7	7	7	7	7	7	7	7	7	无	7	7	7	7	7
831	2	1	3	1	2	3	1	1	1	1	1	7	7	7	7	7	7	7	7	7	7	5	7	7	7	7	7	7	7	7	7	7	7	7	7	7	7	5	7	7	7	7	7	无	7	7	6.5	6.83333	7
832	2	1	2	1	4	1	1	1	2	1	4	7	7	7	7	7	7	7	7	7	7	7	7	7	7	7	7	7	7	7	7	7	7	7	7	7	7	7	7	7	7	7	7	无	7	7	7	7	7
833	1	1	2	1	1	2	2	4	1	3	1	4	4	4	4	4	4	4	4	4	4	4	4	4	4	4	4	4	4	4	4	4	4	4	4	4	4	4	4	4	4	4	4	职业入门教育	4	4	4	4	4
834	1	1	2	1	4	1	1	1	1	1	4	7	7	7	7	7	7	7	7	7	7	7	7	7	5	7	7	7	7	7	7	5	7	7	7	6	7	7	7	6	5	5	4	让我可以接触到许多除了课本上以外的知识实操和动手能力	7	7	7	7	6.5
835	2	1	2	1	2	2	1	1	1	2	4	4	2	3	3	4	4	4	5	5	5	5	6	5	5	5	6	5	6	5	4	2	4	3	2	5	4	5	4	5	5	4	5	无	3	4.25	5.25	4.16667	5.25
836	1	1	1	1	3	3	1	5	2	2	1	4	2	3	6	4	4	4	4	4	4	4	4	5	4	4	3	4	3	4	2	4	4	4	4	5	5	5	5	4	3	4	5	无	3.75	4	4	3.91667	4
837	2	1	5	2	3	2	2	4	2	1	1	7	7	7	7	7	7	7	7	7	7	7	7	7	7	7	7	7	7	7	7	7	7	7	7	7	7	7	7	7	7	7	7	无	7	7	7	7	7
838	2	1	5	1	3	1	1	2	2	2	1	4	4	4	4	4	4	4	4	4	4	4	4	4	4	4	4	4	4	4	4	4	4	4	4	4	4	4	4	4	4	4	4	没有	4	4	4	4	4
839	2	1	2	1	2	2	2	1	2	2	1	5	5	5	5	5	5	5	5	5	5	5	5	6	4	6	5	6	5	5	5	4	5	5	5	6	7	7	7	6	6	6	6	无	5	5	5	5	5.25
840	1	1	1	1	4	2	2	1	1	2	3	5	5	5	5	6	6	6	6	6	6	6	6	5	5	5	5	5	5	5	5	5	5	5	5	5	5	5	5	6	6	6	6	无	5	6	6	5.66667	5
841	2	1	3	1	4	2	2	5	2	2	4	4	4	4	4	4	4	4	4	4	4	4	4	4	4	4	4	4	4	4	4	4	4	4	4	4	4	4	4	4	4	4	4	无	4	4	4	4	4
842	1	1	2	1	3	1	1	3	1	3	1	4	3	5	4	5	6	4	4	5	4	4	4	4	3	4	4	4	3	3	3	3	4	3	4	4	4	4	4	4	4	4	4	没有	4	4.75	4.25	4.33333	3.75
843	2	1	2	1	4	1	1	3	1	2	1	4	4	5	4	4	4	4	4	4	4	5	4	4	4	5	4	4	6	6	6	5	6	6	6	6	5	6	6	6	5	5	6	无建议	4.25	4	4.25	4.16667	4.25
844	2	1	1	1	2	2	2	2	2	1	4	7	7	7	7	7	7	7	7	7	7	7	7	7	7	7	7	7	7	7	7	7	7	7	7	7	7	7	7	7	7	7	7	无	7	7	7	7	7
845	2	1	5	1	4	1	1	1	1	1	4	6	5	7	6	4	5	4	6	7	7	7	6	5	5	7	6	5	5	7	5	5	7	6	7	6	7	7	7	6	6	6	6	实践是检验真理的唯一标准	6	4.75	6.75	5.83333	5.75
846	2	1	1	1	3	1	1	1	1	1	1	5	3	6	6	5	5	5	7	7	7	5	5	4	4	4	4	7	7	7	7	3	2	3	4	7	7	7	7	7	7	7	7	无	5	5.5	6	5.5	4
847	2	1	1	1	2	3	3	4	2	2	4	6	6	6	6	6	6	6	6	6	6	6	6	6	6	6	6	6	6	6	6	6	6	6	6	6	6	6	6	6	6	6	6	无	6	6	6	6	6
848	2	1	2	1	4	1	1	1	2	1	1	7	7	7	7	7	7	7	7	7	7	7	7	7	7	7	7	7	7	7	7	7	7	7	7	7	7	7	7	7	7	7	7	有帮助	7	7	7	7	7
849	2	1	2	1	3	2	1	2	2	3	3	7	7	7	7	5	4	5	5	6	6	4	5	5	5	5	6	7	5	5	5	4	7	5	7	5	5	4	6	6	6	6	5	无	7	4.75	5.25	5.66667	5.25
850	1	1	1	1	1	3	1	3	2	2	1	6	4	5	6	5	4	6	3	4	4	6	6	5	4	6	5	6	3	5	4	3	5	4	4	5	5	5	6	6	4	6	6	无	5.25	4.5	5	4.91667	5
851	2	1	5	1	4	2	3	2	1	1	1	5	5	5	5	5	5	5	5	4	5	3	4	4	4	6	6	5	5	5	5	5	5	5	5	5	5	5	5	5	5	5	5	无	5	5	4	4.66667	5
852	2	1	2	1	3	2	2	3	2	1	1	7	7	7	7	7	7	7	7	7	7	7	7	7	7	7	7	7	7	7	7	7	7	7	7	7	7	7	7	7	7	7	7	无	7	7	7	7	7
853	2	2	2	1	3	2	1	1	1	1	1	7	6	6	6	2	6	5	5	6	6	6	5	6	5	4	5	6	5	5	6	6	5	5	6	6	5	5	5	6	5	5	6	。	6.25	4.5	5.75	5.5	5
854	2	1	3	1	3	1	1	3	2	1	1	5	5	5	5	5	5	5	5	5	5	5	5	5	5	5	5	5	5	5	5	5	5	5	5	6	6	6	6	6	6	6	6	无	5	5	5	5	5
855	1	1	1	2	4	1	1	3	2	2	2	4	4	4	4	6	5	4	7	4	5	3	3	5	5	5	5	5	5	5	5	5	5	5	5	5	5	5	5	5	5	5	5	无	4	5.5	3.75	4.41667	5
856	2	1	2	1	3	1	1	2	2	2	4	6	6	6	6	3	3	3	3	3	3	3	3	4	4	5	5	4	3	7	3	3	5	3	3	4	4	3	4	4	4	4	4	无	6	3	3	4	4.5
857	2	1	2	1	4	2	1	2	2	1	1	3	2	3	2	2	2	2	2	2	2	2	2	2	2	2	2	2	2	2	2	2	2	2	2	2	2	2	2	2	2	2	2	专业课程夯实了财会理论基础，实训课提升了账务处理能力。建议增设数字化财务、税务实操课程，增加企业实习机会，更好对接职业发展需求。	2.5	2	2	2.16667	2
858	1	2	3	1	2	1	1	1	1	1	1	7	7	7	7	7	7	7	7	7	7	7	7	7	7	7	7	7	7	7	7	7	7	7	7	7	7	7	7	7	7	7	7	无	7	7	7	7	7
859	2	1	2	1	2	3	3	1	1	2	4	5	4	6	5	4	5	5	5	4	4	5	5	5	5	5	5	5	4	4	4	3	6	5	5	5	5	5	5	5	5	5	5	无	5	4.75	4.5	4.75	5
860	2	1	2	1	4	1	1	2	2	1	1	5	3	5	4	4	4	4	4	4	4	4	4	4	4	4	4	4	4	4	4	4	4	4	4	4	4	4	4	4	4	4	4	无	4.25	4	4	4.08333	4
861	1	1	5	1	3	1	1	3	2	2	1	5	6	3	6	4	6	6	6	6	6	6	6	6	6	6	6	6	6	6	6	6	6	6	6	6	6	6	6	6	6	6	6	无	5	5.5	6	5.5	6
862	2	1	3	1	3	2	1	4	2	1	1	4	4	4	4	4	4	4	4	4	4	4	4	4	4	4	4	4	4	4	4	4	4	4	4	4	4	4	4	4	4	4	4	无	4	4	4	4	4
863	2	4	4	2	1	4	4	5	2	3	4	7	7	7	7	1	1	1	1	7	7	7	7	1	1	1	1	7	7	7	7	1	1	1	1	7	7	7	7	1	1	1	1	无	7	1	7	5	1
864	2	2	2	1	1	3	1	2	1	1	1	7	7	7	7	7	7	7	7	7	7	7	7	7	7	7	7	7	7	7	7	7	7	7	7	7	7	7	7	7	7	7	7	没有	7	7	7	7	7
865	2	1	3	1	2	1	2	2	2	1	4	5	5	6	7	5	5	6	5	5	6	5	5	6	5	5	5	5	6	5	5	5	5	5	5	5	5	5	5	6	5	6	6	无	5.75	5.25	5.25	5.41667	5.25
866	1	2	3	1	4	1	1	3	1	3	1	3	3	3	3	1	1	1	1	2	2	2	2	3	2	2	2	2	2	2	2	3	3	3	3	3	3	3	3	3	3	3	3	无	3	1	2	2	2.25
867	2	1	2	1	2	1	1	3	1	1	1	6	5	4	6	4	5	5	5	4	4	4	4	5	5	5	4	5	4	4	4	4	4	4	4	4	4	5	5	5	5	5	5	无	5.25	4.75	4	4.66667	4.75
868	2	1	5	1	4	1	1	2	1	1	4	2	1	1	5	2	2	2	3	3	2	4	3	2	2	2	3	5	4	3	2	2	3	2	2	3	3	3	3	4	5	5	4	在职业规划上还是不能有较清晰指导	2.25	2.25	3	2.5	2.25
869	2	1	2	2	4	1	1	1	1	1	1	7	4	7	7	7	7	7	7	7	7	7	7	7	7	7	7	7	7	7	7	7	7	7	7	7	7	7	7	7	7	7	7	多多进行学习	6.25	7	7	6.75	7
870	2	1	3	1	2	3	3	3	2	1	4	5	5	5	5	5	5	5	5	5	5	5	5	5	5	5	5	5	5	5	5	5	5	5	5	5	5	5	5	5	5	5	5	无	5	5	5	5	5
872	2	1	1	1	2	2	2	2	2	1	1	6	6	6	6	4	5	6	5	6	6	3	6	6	6	6	6	6	6	6	6	6	6	6	6	6	6	6	6	6	6	6	6	无	6	5	5.25	5.41667	6
873	2	2	2	1	4	1	1	3	2	1	1	5	4	4	4	4	4	4	4	4	4	4	4	4	4	4	4	4	4	4	4	4	4	4	4	4	4	4	4	4	4	4	4	无	4.25	4	4	4.08333	4
874	2	2	3	1	1	2	1	3	1	3	1	6	5	5	5	5	4	4	5	6	6	5	5	5	5	4	4	5	4	3	4	2	6	3	6	3	3	3	3	3	4	3	3	无	5.25	4.5	5.5	5.08333	4.5
875	1	1	2	1	2	1	1	5	2	1	1	6	6	6	6	6	6	6	6	6	5	6	6	4	5	6	6	7	6	5	4	4	5	6	7	6	6	7	7	6	7	6	5	无	6	6	5.75	5.91667	5.25
876	1	2	3	1	4	1	1	3	1	2	1	3	4	4	4	4	4	4	4	4	4	4	3	5	4	4	5	5	5	5	4	5	3	4	4	4	4	4	4	4	4	5	5	提升能力	3.75	4	3.75	3.83333	4.5
877	1	1	5	1	4	2	1	1	2	1	4	7	1	4	3	2	2	2	2	3	2	2	2	2	2	2	5	7	2	2	1	1	1	1	1	4	2	2	4	5	5	5	5	无	3.75	2	2.25	2.66667	2.75
878	2	2	3	1	2	3	3	3	2	1	3	7	7	7	7	7	7	7	7	7	7	7	7	7	7	7	7	7	7	7	7	7	7	7	7	7	7	7	7	7	7	7	7	无	7	7	7	7	7
879	2	1	2	1	4	1	1	3	2	3	4	1	1	1	1	1	1	1	1	1	1	1	1	1	1	1	1	1	1	1	1	1	1	1	1	1	1	1	1	1	1	1	1	无	1	1	1	1	1
880	1	1	2	2	4	1	1	2	2	2	1	7	4	6	7	3	4	5	5	5	7	4	3	5	6	6	4	4	5	4	3	4	4	5	6	4	3	3	6	6	4	5	3	具体实操的部分太少，应更多地添加具体的项目	6	4.25	4.75	5	5.25
881	1	2	3	1	3	1	1	5	2	3	1	5	5	5	5	5	5	5	5	5	5	5	5	5	5	5	5	5	5	5	5	5	5	5	5	5	5	5	5	5	5	5	5	挺好的	5	5	5	5	5
882	2	1	2	1	2	2	2	5	2	3	4	5	4	4	4	4	4	4	4	4	4	4	4	4	4	4	4	4	4	4	4	4	4	4	4	4	4	4	4	4	4	4	4	无	4.25	4	4	4.08333	4
883	1	1	3	1	4	1	1	4	2	1	1	7	7	7	7	7	7	7	7	7	7	7	7	7	7	7	7	7	7	7	7	7	7	7	7	7	7	7	7	7	7	7	7	无	7	7	7	7	7
884	2	1	1	1	2	1	3	1	2	3	2	6	4	4	5	7	7	7	7	7	7	7	7	7	7	7	7	7	7	7	7	7	7	7	7	7	7	7	7	7	7	7	7	无	4.75	7	7	6.25	7
885	2	1	2	2	1	4	4	1	1	1	3	7	7	7	7	7	7	7	7	7	7	7	7	7	7	7	7	7	7	7	7	7	7	7	7	7	7	7	7	7	7	7	7	无	7	7	7	7	7
886	2	1	2	1	2	1	1	3	2	3	1	4	1	4	6	4	4	4	4	4	4	4	4	4	4	4	4	4	4	4	4	4	4	4	4	4	4	4	4	4	4	4	4	我想学习AI视频制作	3.75	4	4	3.91667	4
887	1	2	3	1	2	1	1	2	2	1	1	7	7	7	7	7	7	7	7	7	7	7	7	7	7	7	7	7	7	7	7	7	7	7	7	7	7	7	7	7	7	7	7	无	7	7	7	7	7
888	1	2	3	1	3	1	1	4	2	2	1	4	3	4	6	4	4	4	4	4	4	4	4	5	5	5	5	5	5	5	5	5	5	5	5	5	5	5	5	5	5	5	5	无	4.25	4	4	4.08333	5
889	1	1	5	2	4	1	1	3	1	1	4	4	3	4	3	2	2	2	2	2	2	2	2	2	2	2	2	2	2	2	2	2	2	2	2	2	2	2	2	2	2	2	2	无	3.5	2	2	2.5	2
890	1	1	2	1	2	1	1	4	1	2	1	4	3	6	4	5	5	6	6	5	7	3	4	4	6	3	3	4	3	6	6	2	7	4	3	7	4	3	7	4	3	4	3	无	4.25	5.5	4.75	4.83333	4
891	2	1	2	1	2	2	2	1	2	1	1	7	7	7	7	7	7	7	7	7	7	7	7	7	7	7	7	7	7	7	7	7	7	7	7	7	7	7	7	7	7	7	7	无	7	7	7	7	7
892	2	1	5	2	2	3	2	3	1	1	1	5	5	4	4	4	4	4	4	4	4	4	4	4	4	4	4	4	4	4	4	3	3	3	4	4	4	4	4	4	4	4	4	无	4.5	4	4	4.16667	4
893	2	2	3	1	2	2	2	1	1	1	3	7	7	7	7	7	7	7	7	7	7	7	7	7	7	7	7	7	7	7	7	7	7	7	7	7	7	7	7	7	7	7	7	无	7	7	7	7	7
894	2	2	2	1	2	1	1	1	2	1	3	6	5	5	5	4	4	5	5	5	4	5	5	6	5	6	5	5	5	6	5	5	6	5	6	6	7	6	6	6	5	6	6	无	5.25	4.5	4.75	4.83333	5.5
895	2	1	2	2	2	2	3	2	1	2	4	5	4	7	7	6	6	6	6	6	6	3	6	4	4	4	5	6	3	6	3	5	5	4	4	4	4	4	4	4	4	4	4	无	5.75	6	5.25	5.66667	4.25
896	2	1	2	2	4	2	1	5	2	2	1	4	4	4	4	4	4	4	4	4	4	4	4	4	4	4	4	4	4	4	4	4	4	4	4	4	4	4	4	4	4	4	4	让我学会职场规则	4	4	4	4	4
897	1	1	3	1	4	2	2	3	2	3	1	4	4	4	4	4	4	4	4	4	4	4	4	4	4	4	4	4	4	4	4	4	4	4	4	4	4	4	4	4	4	4	4	无	4	4	4	4	4
898	1	1	3	2	3	1	1	3	2	1	4	7	7	7	7	7	7	7	7	7	7	7	7	7	7	7	7	7	7	7	7	7	7	7	7	7	7	7	7	7	7	7	7	无	7	7	7	7	7
899	2	1	2	2	4	1	1	1	2	1	1	4	4	4	4	4	4	4	4	4	4	4	4	4	4	4	4	4	4	4	4	4	4	4	4	4	4	4	4	4	4	4	4	无	4	4	4	4	4
900	2	1	3	1	4	1	1	1	1	1	1	5	5	6	5	5	5	5	5	5	5	5	5	5	5	5	5	7	5	5	5	5	5	5	5	5	5	5	5	5	5	5	5	无	5.25	5	5	5.08333	5
901	2	1	5	1	4	2	2	4	2	2	4	4	2	6	5	5	4	5	5	3	4	5	5	4	4	5	4	5	3	4	1	3	4	3	4	5	4	4	6	4	5	6	4	我希望能开展相关的讲座想去的人可以去听或者是安排一些希活动想参加的人去参加	4.25	4.75	4.25	4.41667	4.25
902	2	1	5	1	2	2	2	2	1	1	4	7	7	7	7	7	7	7	7	7	7	7	7	7	7	7	7	7	7	7	7	7	7	7	7	7	7	7	7	7	7	7	7	无	7	7	7	7	7
903	2	1	3	1	2	1	1	2	1	1	1	6	5	4	4	4	4	4	4	5	5	4	5	5	5	5	6	6	5	5	5	4	5	4	5	5	6	6	6	5	5	6	5	多些实践机会	4.75	4	4.75	4.5	5.25
904	2	1	3	1	4	1	1	1	1	1	1	7	7	7	7	7	7	7	7	7	7	7	7	6	6	6	6	5	5	5	5	5	5	5	5	5	5	5	5	5	5	5	5	无	7	7	7	7	6
905	2	1	2	2	4	1	1	1	2	1	4	7	7	7	7	7	7	7	7	7	7	7	7	7	7	7	7	7	7	7	7	7	7	7	7	7	7	7	7	7	7	7	7	无	7	7	7	7	7
906	2	1	3	1	3	1	2	3	2	2	4	6	5	5	5	6	6	3	6	5	5	5	5	5	5	5	5	5	5	5	5	5	5	5	5	5	5	5	5	5	5	5	5	无	5.25	5.25	5	5.16667	5
907	2	1	5	1	4	1	1	1	2	1	1	5	5	3	4	4	4	3	3	3	3	3	3	3	3	3	4	4	4	4	4	4	4	4	4	4	4	4	4	4	4	4	4	无	4.25	3.5	3	3.58333	3.25
908	2	1	3	1	3	1	1	1	1	1	4	7	7	7	7	7	7	7	7	7	7	7	7	7	7	7	7	7	7	7	5	4	7	7	7	7	5	7	7	7	7	7	5	无	7	7	7	7	7
909	1	1	2	2	4	1	1	3	1	1	4	4	4	4	4	4	4	4	4	4	4	4	4	4	4	4	4	4	4	4	4	4	4	4	4	4	4	4	4	4	4	3	4	暂无	4	4	4	4	4
910	2	4	2	1	2	2	1	1	2	1	2	7	7	7	7	6	6	6	6	6	6	7	6	6	6	6	6	6	6	7	7	7	7	7	7	7	7	7	7	7	7	7	7	无。	7	6	6.25	6.41667	6
911	2	2	3	1	3	1	1	1	1	1	1	7	7	7	7	7	7	7	7	7	7	7	7	7	7	7	7	7	5	7	6	5	5	5	7	7	7	7	7	7	7	7	7	无	7	7	7	7	7
912	2	1	5	2	4	1	1	1	2	1	2	6	4	4	5	4	3	4	4	3	4	4	4	4	3	3	4	4	3	4	3	4	4	4	5	4	4	4	4	4	4	4	4	暂无	4.75	3.75	3.75	4.08333	3.5
913	1	1	3	1	2	1	1	4	2	3	4	1	1	1	1	1	1	1	1	3	3	3	3	4	4	4	4	4	4	4	4	4	4	4	4	4	4	3	4	4	4	4	4	无	1	1	3	1.66667	4
914	2	2	2	1	1	3	2	2	2	1	4	7	4	7	7	7	7	7	7	7	7	7	7	7	7	7	7	7	7	7	7	7	7	7	7	7	7	7	7	7	7	7	7	无	6.25	7	7	6.75	7
915	1	1	2	1	2	3	3	4	2	2	1	3	3	3	3	3	3	3	3	3	3	3	3	3	3	3	3	5	4	3	4	3	4	3	3	4	5	4	4	4	3	3	3	增加实践课	3	3	3	3	3
916	1	1	5	1	2	1	1	5	2	2	4	5	5	5	6	6	5	6	6	6	6	6	6	6	5	6	6	7	6	6	6	6	6	6	6	6	6	6	6	6	6	6	6	无	5.25	5.75	6	5.66667	5.75
917	2	1	2	2	2	2	3	1	1	1	1	5	3	3	3	3	2	2	2	3	2	2	3	3	3	3	3	4	3	3	3	3	5	3	4	3	3	3	3	3	3	3	3	无	3.5	2.25	2.5	2.75	3
918	2	1	5	1	4	3	2	2	2	2	1	5	4	5	4	5	6	6	5	4	5	5	6	6	5	4	3	6	3	6	4	6	5	5	4	5	5	4	5	5	5	6	5	无	4.5	5.5	5	5	4.5
919	2	2	5	1	4	1	1	3	2	3	1	7	1	6	6	6	6	6	6	6	6	6	6	6	6	6	6	6	6	6	6	6	6	6	6	6	6	6	6	6	6	6	6	无	5	6	6	5.66667	6
920	2	1	5	1	3	1	2	2	1	1	4	4	4	4	4	4	4	4	4	4	4	4	4	4	4	4	4	4	4	4	4	4	4	4	4	4	4	4	4	4	4	4	4	无	4	4	4	4	4
921	2	1	3	1	4	1	1	1	1	1	1	4	4	3	4	3	4	5	4	5	5	5	4	4	4	4	5	5	4	4	4	4	5	4	4	4	5	5	5	4	3	4	3	无	3.75	4	4.75	4.16667	4.25
922	1	1	5	2	2	3	3	3	2	2	2	4	4	4	4	4	4	4	4	4	4	4	4	4	5	4	5	5	5	5	5	5	4	5	4	4	5	4	4	4	5	5	5	无	4	4	4	4	4.5
923	2	1	2	1	2	2	3	4	2	1	4	4	3	5	4	4	4	4	4	4	4	4	4	4	4	4	4	4	4	4	4	4	4	4	4	4	4	4	4	4	4	4	4	无	4	4	4	4	4
924	1	1	2	1	3	1	1	3	1	2	1	4	4	4	4	4	4	4	4	4	4	4	4	4	4	4	4	4	4	4	4	4	4	4	4	4	4	4	4	4	4	4	4	无	4	4	4	4	4
925	2	1	2	2	4	1	1	1	2	1	1	3	4	3	2	3	3	4	4	3	4	3	4	3	3	3	3	4	3	3	3	2	4	3	5	4	3	2	3	4	4	4	4	希望多些实践课程，多上手试试	3	3.5	3.5	3.33333	3
926	2	2	2	1	4	1	1	1	1	2	3	1	1	1	1	1	1	1	1	1	1	1	1	1	1	1	1	1	1	1	1	1	1	1	1	1	1	1	1	1	1	1	1	无	1	1	1	1	1
927	1	1	1	1	4	2	2	1	1	1	1	7	7	7	7	7	7	7	7	7	7	7	7	7	7	7	7	7	7	7	7	7	7	7	7	7	7	7	7	7	7	7	7	对	7	7	7	7	7
928	1	1	2	1	2	3	1	3	2	1	1	3	3	5	4	3	3	3	3	3	3	3	4	5	4	3	4	4	3	4	2	2	3	3	3	3	3	3	4	4	4	3	3	无	3.75	3	3.25	3.33333	4
929	2	1	5	1	4	1	1	2	2	2	1	3	3	3	3	4	4	3	3	3	3	3	3	2	2	3	3	3	2	3	3	3	3	3	3	6	6	5	5	4	4	4	5	好	3	3.5	3	3.16667	2.5
930	2	2	5	1	2	3	2	1	1	2	1	4	4	4	4	4	4	4	4	4	4	4	4	4	4	4	4	4	4	4	4	4	4	4	4	4	4	4	4	4	4	4	4	无	4	4	4	4	4
931	2	1	3	1	4	2	1	3	1	3	4	4	6	6	5	6	6	6	6	6	6	6	6	6	6	6	6	6	6	6	6	6	6	6	6	6	6	6	6	6	6	6	6	没有意见	5.25	6	6	5.75	6
932	2	1	2	1	4	1	1	4	1	1	1	6	4	4	3	5	3	5	5	5	5	3	5	6	5	5	6	5	4	5	2	3	6	6	5	5	5	5	5	5	5	5	5	无	4.25	4.5	4.5	4.41667	5.5
933	2	1	2	2	4	1	1	1	2	1	4	3	2	3	7	3	4	4	5	3	4	4	7	7	7	7	7	7	7	7	7	2	5	4	4	7	7	7	7	5	4	5	3	无	3.75	4	4.5	4.08333	7
934	2	2	3	1	4	2	1	3	1	1	3	7	7	7	7	7	7	7	7	7	7	7	7	7	7	7	7	7	7	7	7	7	7	7	7	7	7	7	7	7	7	7	7	无	7	7	7	7	7
935	2	1	5	1	1	1	1	2	2	2	1	7	7	7	7	7	7	7	7	7	7	7	7	7	7	7	7	7	7	7	7	6	6	6	6	6	6	6	6	6	6	6	6	无	7	7	7	7	7
936	2	1	1	1	4	1	1	1	2	2	1	4	4	4	4	4	4	4	4	4	4	4	4	4	4	4	4	4	4	4	4	4	4	4	4	4	4	4	4	4	4	4	4	无	4	4	4	4	4
937	1	1	5	1	3	2	1	2	2	2	1	5	5	5	5	6	6	5	6	7	6	7	7	7	6	7	7	7	6	6	6	7	7	7	6	7	7	7	7	7	7	7	7	挺好的	5	5.75	6.75	5.83333	6.75
938	2	2	2	1	4	1	1	3	2	1	1	1	1	1	1	7	7	7	7	7	7	7	7	7	7	7	7	7	7	7	7	7	7	7	7	7	7	7	7	7	7	7	7	无	1	7	7	5	7
939	2	1	5	1	4	2	2	5	2	2	1	6	6	6	6	6	6	6	6	6	6	6	6	6	6	6	6	6	6	6	6	6	6	6	6	6	6	6	6	6	6	6	6	无	6	6	6	6	6
940	1	1	5	1	4	1	1	3	2	1	4	3	3	3	3	4	4	4	4	4	4	4	4	4	4	4	4	4	4	4	4	4	4	4	4	4	4	4	4	4	4	4	4	无	3	4	4	3.66667	4
941	1	1	1	1	2	1	3	1	1	1	1	7	7	7	7	7	7	7	7	7	7	7	7	7	7	7	7	7	7	7	7	7	7	7	7	7	7	7	7	7	7	7	7	无	7	7	7	7	7
942	1	1	2	1	2	2	2	4	2	1	1	4	4	5	7	4	2	4	4	4	5	5	5	5	6	6	4	5	4	4	5	4	4	4	5	4	4	4	4	5	5	5	4	无	5	3.5	4.75	4.41667	5.25
943	2	1	5	1	4	2	1	1	2	1	1	5	4	4	4	4	4	4	4	4	4	6	6	6	4	5	7	7	4	5	6	4	4	4	4	6	7	7	4	5	3	5	4	目前本专业的课程设置为我搭建了扎实的专业知识体系，实践环节也让我初步掌握了岗位所需的基础技能，为职业规划的落地提供了核心支撑。 但同时也存在一些不足：一是部分课程内容与行业最新需求脱节，实用性有待提升；二是实践环节多为校内实训，缺乏真实职场的深度历练；三是职业规划相关指导不够个性化，难以匹配不同学生的职业方向。 建议：1. 及时更新课程内容，增加行业前沿与岗位实操相关内容；2. 深化校企合作，提供更多真实项目实习机会；3. 完善个性化职业指导，针对性提升求职与职业发展能力。	4.25	4	5	4.41667	5.5
944	2	1	3	2	3	1	1	3	2	1	4	7	7	7	7	7	7	7	7	7	7	7	7	7	7	7	7	7	7	7	7	7	7	7	7	7	7	7	7	7	7	7	7	无	7	7	7	7	7
945	1	1	1	1	2	1	1	3	2	2	2	6	6	6	6	6	6	6	6	6	6	6	6	6	6	6	6	6	6	6	6	6	6	6	6	6	6	6	6	6	6	6	6	无	6	6	6	6	6
946	2	2	3	1	2	2	2	1	1	2	1	6	6	6	6	4	4	4	4	5	6	5	5	6	6	5	6	7	6	6	6	4	6	6	6	6	4	4	4	6	4	5	6	无	6	4	5.25	5.08333	5.75
947	2	1	5	1	3	1	1	5	2	2	1	3	3	3	3	3	3	3	3	3	3	3	3	3	3	3	3	3	3	3	3	3	3	3	3	3	3	3	3	3	3	3	3	无	3	3	3	3	3
948	2	1	2	1	3	1	3	3	2	1	1	5	5	5	5	5	5	5	5	5	5	5	5	5	4	5	5	5	5	5	5	5	5	5	5	5	4	5	4	5	5	6	5	相关的教学设备可以多一些	5	5	5	5	4.75
949	2	2	5	1	2	3	2	3	2	2	1	4	4	4	4	4	4	4	4	4	4	4	4	4	4	4	4	4	4	4	4	4	4	4	4	4	4	4	4	4	4	4	4	无	4	4	4	4	4
950	2	2	3	1	4	1	1	2	2	2	1	7	7	7	7	7	7	7	7	7	7	7	7	7	7	7	7	7	7	7	7	7	7	7	7	7	7	7	7	7	7	7	7	无	7	7	7	7	7
951	1	1	3	2	4	1	1	3	2	2	4	4	4	4	4	4	4	4	4	4	4	4	4	4	4	4	4	4	4	4	4	4	4	4	4	4	4	4	4	4	4	4	4	无	4	4	4	4	4
952	2	1	2	2	4	2	2	3	2	1	4	7	4	7	7	7	7	7	7	7	6	7	7	6	6	6	6	7	7	7	7	1	7	2	7	7	7	7	7	7	7	7	7	无	6.25	7	6.75	6.66667	6
953	2	1	5	2	2	2	1	1	1	1	4	3	4	4	3	4	4	4	4	4	4	4	4	4	4	4	4	4	4	4	4	4	5	3	4	4	5	5	5	4	4	4	3	无	3.5	4	4	3.83333	4
955	1	3	1	1	4	1	1	4	2	2	1	3	4	3	3	4	4	4	4	4	3	4	4	4	4	5	4	4	5	5	3	3	3	5	4	3	5	3	5	3	4	4	3	无	3.25	4	3.75	3.66667	4.25
956	1	3	2	1	2	3	2	5	1	1	1	7	5	5	5	4	5	5	5	4	4	4	4	4	4	4	4	5	4	5	4	4	5	6	4	3	3	5	5	4	5	3	5	无	5.5	4.75	4	4.75	4
957	2	1	1	1	3	2	2	3	1	2	1	4	4	4	4	4	4	4	4	4	4	4	4	4	4	4	4	4	4	4	4	4	4	4	4	4	4	4	4	4	4	4	4	无	4	4	4	4	4
958	2	1	1	1	2	2	2	1	1	3	4	3	2	4	2	1	2	2	1	2	2	1	2	2	1	2	2	2	1	2	1	1	1	1	1	2	2	2	2	2	2	2	2	无	2.75	1.5	1.75	2	1.75
959	2	2	3	1	4	1	2	3	2	2	1	6	2	5	2	3	1	3	2	4	2	2	2	1	4	4	3	3	3	2	2	1	4	2	2	3	2	2	3	3	2	3	2	无	3.75	2.25	2.5	2.83333	3
960	1	1	1	1	4	1	1	3	1	2	4	4	4	4	7	6	6	6	6	6	6	6	6	6	6	6	6	6	6	6	6	6	6	6	6	6	6	6	6	6	6	6	6	无	4.75	6	6	5.58333	6
961	2	2	3	1	2	3	3	1	1	1	3	7	7	7	7	7	7	7	7	7	7	7	7	7	7	7	7	7	7	7	7	7	7	7	7	4	4	4	4	7	7	7	7	无	7	7	7	7	7
963	2	1	1	1	4	1	1	3	2	3	1	5	2	5	5	5	5	5	5	3	5	5	5	3	5	4	4	4	4	4	4	4	4	4	4	4	4	4	4	4	4	4	4	挺好的	4.25	5	4.5	4.58333	4
964	2	1	3	1	1	3	3	1	1	1	2	6	6	6	6	6	6	6	6	6	6	6	6	6	6	6	6	6	6	6	6	6	6	6	6	6	6	6	6	6	6	6	6	暂无	6	6	6	6	6
965	2	1	3	1	2	3	2	1	1	1	1	4	4	4	5	6	5	6	5	6	5	6	5	6	5	6	5	6	5	6	5	6	5	6	5	6	5	6	5	6	5	6	5	无	4.25	5.5	5.5	5.08333	5.5
966	1	1	1	1	4	2	2	3	2	3	4	4	4	4	4	4	4	4	4	4	4	4	4	4	4	4	4	4	4	4	4	4	4	4	4	4	4	4	4	4	4	4	4	无	4	4	4	4	4
967	1	1	1	1	4	1	1	3	2	1	1	7	7	7	7	7	7	7	7	7	7	7	7	7	7	7	7	7	7	7	7	7	7	7	7	7	7	7	7	7	7	7	7	无	7	7	7	7	7
968	1	1	1	1	2	1	3	3	2	2	1	5	5	5	5	5	5	5	5	5	5	5	5	5	5	5	5	5	5	5	5	5	4	5	5	5	4	5	4	4	4	4	4	无	5	5	5	5	5
969	2	1	1	1	4	1	1	2	1	1	1	7	7	7	4	2	2	2	2	4	4	4	4	4	4	4	4	4	4	4	4	4	4	4	4	4	4	4	4	4	4	4	4	无	6.25	2	4	4.08333	4
970	2	1	3	1	1	3	3	1	1	1	1	7	7	7	7	7	7	7	7	7	7	7	7	7	7	7	7	7	7	7	7	7	7	7	7	7	7	7	7	7	7	7	7	有帮助	7	7	7	7	7
971	2	1	3	1	4	2	2	1	1	1	1	7	5	4	5	6	5	7	5	5	3	5	6	6	5	6	6	5	6	6	7	6	7	6	6	6	6	5	6	6	6	6	6	无	5.25	5.75	4.75	5.25	5.75
972	1	3	2	1	2	1	1	1	1	2	2	1	1	1	1	1	1	1	1	1	1	1	1	1	1	1	1	1	1	1	1	7	7	7	7	7	7	7	7	7	7	7	7	没有价值	1	1	1	1	1
973	1	1	1	1	2	1	1	4	2	1	1	7	7	7	7	7	7	7	7	7	7	7	7	7	7	7	7	7	7	7	7	7	7	7	7	7	7	7	7	7	7	7	7	无	7	7	7	7	7
974	2	1	1	1	4	2	1	1	2	2	4	6	6	6	6	6	6	6	4	6	5	4	6	4	5	5	4	6	4	6	5	6	4	5	5	4	3	5	5	5	6	5	4	无	6	5.5	5.25	5.58333	4.5
975	2	1	1	1	3	1	1	4	1	1	3	7	7	7	7	7	7	7	7	7	7	7	7	7	7	7	7	7	7	7	7	7	7	7	7	7	7	7	7	7	7	7	7	无	7	7	7	7	7
976	2	1	3	1	3	1	1	3	2	2	4	2	4	4	4	4	4	4	4	5	5	5	5	5	5	5	5	5	5	5	5	2	2	2	2	6	6	6	6	6	6	6	6	无	3.5	4	5	4.16667	5
978	2	3	2	1	3	2	1	2	1	2	1	5	5	5	5	5	5	5	5	5	5	5	5	5	5	5	5	5	5	5	5	5	5	5	5	5	5	5	5	5	5	5	5	无	5	5	5	5	5
979	1	1	1	1	4	2	2	2	1	2	1	1	1	1	1	1	1	1	1	7	7	7	7	7	7	7	7	7	7	7	7	7	7	7	7	7	7	7	7	7	7	7	7	好	1	1	7	3	7
980	1	1	3	1	3	2	2	3	1	1	1	4	4	4	4	4	4	4	4	4	4	4	4	4	4	4	4	4	4	4	4	4	4	4	4	4	4	4	4	4	4	4	4	无	4	4	4	4	4
981	1	1	1	1	4	2	2	3	2	3	4	3	3	4	3	3	4	5	4	4	4	3	5	3	5	4	4	4	5	4	5	4	4	4	3	5	5	4	4	3	4	4	4	无	3.25	4	4	3.75	4
982	2	1	3	1	3	1	2	3	2	2	1	2	3	7	7	7	7	7	7	4	6	4	6	4	5	6	7	5	4	4	4	3	5	4	6	7	7	6	6	4	5	5	4	可以多一些实践活动	4.75	7	5	5.58333	5.5
983	2	3	2	1	4	3	1	2	2	2	1	5	5	5	5	5	5	5	5	5	5	5	5	5	5	5	5	5	5	5	5	5	5	5	5	5	5	5	5	5	5	5	5	无	5	5	5	5	5
984	1	1	1	1	2	1	1	2	2	1	1	7	7	7	7	7	7	7	7	7	7	7	7	7	7	7	7	7	7	7	7	7	7	7	7	4	4	4	4	4	4	4	4	无	7	7	7	7	7
985	1	1	3	1	4	1	1	2	1	2	1	5	5	5	5	5	5	5	5	5	5	5	5	5	5	5	5	5	5	5	5	5	5	5	5	5	5	5	5	5	5	5	5	无	5	5	5	5	5
986	2	1	3	1	2	3	1	1	1	1	4	4	3	4	4	5	5	5	4	4	4	4	4	4	4	4	4	6	3	4	5	3	4	4	4	5	5	4	5	5	4	4	4	无	3.75	4.75	4	4.16667	4
987	2	1	1	1	2	1	1	1	1	2	4	6	6	6	6	4	4	4	4	4	4	4	4	4	4	4	4	4	4	4	4	4	4	4	4	4	4	4	4	4	4	4	4	组无	6	4	4	4.66667	4
988	2	1	3	1	2	2	2	5	2	1	1	5	5	5	5	5	5	5	5	5	5	5	5	5	5	6	5	6	5	5	5	5	5	5	6	5	5	5	5	5	5	5	5	无	5	5	5	5	5.25
989	1	1	1	1	2	1	1	4	2	1	4	3	2	3	4	3	2	3	3	3	3	3	3	4	3	2	2	4	3	2	2	2	2	2	2	3	2	2	3	3	2	4	3	无	3	2.75	3	2.91667	2.75
990	2	1	3	1	2	3	3	2	2	2	1	4	2	3	3	4	4	4	5	4	4	3	4	3	3	4	4	4	2	3	3	3	4	4	5	4	4	4	4	4	4	4	5	希望更多实践	3	4.25	3.75	3.66667	3.5
991	1	3	2	1	3	1	1	5	2	3	1	3	3	3	3	3	3	3	3	3	3	3	3	4	3	3	3	3	3	3	3	3	3	3	3	3	3	3	3	3	3	3	3	0	3	3	3	3	3.25
992	2	1	3	1	3	2	2	3	2	1	1	5	5	4	5	4	4	5	4	4	4	4	6	5	5	5	4	6	5	4	4	4	5	4	4	4	5	4	6	5	6	6	4	无	4.75	4.25	4.5	4.5	4.75
993	1	1	1	1	2	2	2	2	2	2	1	7	7	7	7	7	7	7	7	7	7	7	7	7	7	7	7	7	7	7	7	7	7	7	7	7	7	7	7	7	7	7	7	666	7	7	7	7	7
994	1	1	1	1	4	1	1	3	2	1	4	7	7	7	7	7	7	7	7	7	7	7	7	7	7	7	7	7	7	7	7	7	7	7	7	7	7	7	7	7	7	7	7	无	7	7	7	7	7
995	1	1	3	1	2	4	4	5	2	1	1	5	5	5	5	6	6	6	6	5	4	4	4	4	4	4	4	4	4	4	4	4	3	3	2	5	3	5	5	5	5	5	5	无	5	6	4.25	5.08333	4
996	2	1	1	1	2	3	3	2	2	1	4	5	5	5	5	5	5	5	5	5	5	5	5	5	5	5	5	5	5	5	5	5	5	5	5	5	5	5	5	5	5	5	5	无	5	5	5	5	5
997	1	1	1	1	4	1	1	2	2	1	4	1	1	1	1	1	1	1	1	3	3	4	4	3	3	3	3	4	4	4	4	4	4	4	3	5	5	5	5	4	4	5	4	没有	1	1	3.5	1.83333	3
998	2	1	1	1	2	2	1	3	2	1	1	5	5	5	5	4	4	4	4	4	4	4	4	4	4	4	4	4	4	4	4	4	4	4	4	4	4	4	4	4	4	4	4	无	5	4	4	4.33333	4
999	1	1	5	2	4	1	1	2	2	1	1	5	1	1	1	1	1	4	1	1	1	1	1	5	5	5	2	7	5	7	5	2	7	7	7	5	3	2	4	6	6	6	6	没有	2	1.75	1	1.58333	4.25
1000	1	1	1	1	2	2	3	2	1	2	4	3	2	3	4	4	3	3	3	2	4	4	5	6	4	5	5	7	5	5	4	4	4	4	4	6	6	4	7	6	3	4	4	无	3	3.25	3.75	3.33333	5
1001	1	1	3	1	4	1	1	5	2	3	4	4	4	4	5	3	3	5	3	3	3	3	4	5	5	5	5	5	5	4	4	4	4	4	4	5	5	5	5	5	5	5	5	无	4.25	3.5	3.25	3.66667	5
1002	1	1	3	1	1	3	3	1	1	2	4	3	1	4	1	4	4	4	4	5	5	5	5	4	4	5	5	5	5	2	3	2	4	5	4	6	6	6	6	7	7	7	7	五	2.25	4	5	3.75	4.5
1003	1	1	3	1	4	1	1	3	2	1	1	5	5	4	6	5	5	5	5	5	5	5	5	6	6	6	6	6	6	6	6	4	6	6	6	6	6	6	6	6	5	4	4	可以帮助我更好的认知自己	5	5	5	5	6
1004	2	3	5	1	4	1	1	2	2	1	1	7	7	4	7	3	3	7	4	7	7	7	7	7	7	7	7	7	7	7	7	7	7	7	7	7	7	7	7	7	7	7	7	无	6.25	4.25	7	5.83333	7
1005	2	1	2	1	2	3	3	1	2	1	1	4	4	4	4	4	4	4	4	4	4	4	4	4	4	4	4	4	4	4	4	4	4	4	4	4	4	4	4	4	4	4	4	无	4	4	4	4	4
1006	2	1	5	1	2	2	2	1	1	1	1	7	7	7	7	7	7	7	7	7	7	7	7	7	7	7	7	7	7	7	7	7	7	7	7	7	7	7	7	7	7	7	7	无	7	7	7	7	7
1007	1	3	1	1	3	3	3	5	1	1	1	7	7	7	7	7	7	7	7	7	7	7	7	7	7	7	7	7	7	7	7	7	7	7	7	7	7	7	7	7	7	7	7	无	7	7	7	7	7
1008	2	1	1	1	2	2	2	1	1	3	4	4	4	4	4	4	4	4	4	4	4	4	4	4	4	4	4	4	4	4	4	4	4	4	4	4	4	4	4	4	4	4	4	无	4	4	4	4	4
1009	2	3	2	1	4	1	1	1	2	2	4	5	3	4	5	3	3	3	3	3	3	3	3	4	3	4	4	5	4	4	4	3	4	4	4	4	4	4	4	3	3	3	3	无	4.25	3	3	3.41667	3.75
1010	1	1	3	1	4	2	2	4	2	3	1	6	6	6	6	5	6	5	6	5	6	6	5	5	5	5	6	5	5	5	6	6	5	5	5	5	5	5	5	5	5	5	5	无	6	5.5	5.5	5.66667	5.25
1011	1	1	1	2	2	2	2	2	2	1	1	4	4	4	4	4	4	4	4	4	4	4	4	4	4	4	4	4	4	4	4	4	4	4	4	4	4	4	4	4	4	4	4	无	4	4	4	4	4
1012	2	1	5	1	3	2	1	1	2	2	1	6	6	6	6	6	6	6	6	6	6	6	6	6	6	6	6	6	6	6	6	6	6	6	6	6	6	6	6	6	6	6	6	无	6	6	6	6	6
1013	1	1	3	1	4	2	2	5	2	2	4	7	7	7	7	7	7	7	7	7	7	7	7	7	7	7	7	7	7	7	7	7	1	1	1	7	7	7	7	7	7	7	7	无	7	7	7	7	7
1014	2	1	3	2	4	1	1	1	1	1	1	7	7	7	7	6	5	7	5	5	6	6	6	7	7	7	7	7	4	5	5	5	5	5	7	7	7	7	7	7	7	7	7	无	7	5.75	5.75	6.16667	7
1015	2	1	5	1	3	1	1	1	1	1	1	4	4	4	4	4	4	4	5	4	5	5	5	5	5	5	5	4	4	4	4	4	4	4	4	4	4	4	4	4	4	4	4	无	4	4.25	4.75	4.33333	5
1016	2	3	5	1	4	1	1	1	2	2	4	5	5	5	6	5	6	6	5	6	5	6	6	5	6	5	6	6	5	6	5	5	6	5	6	6	6	5	6	5	6	6	5	无	5.25	5.5	5.75	5.5	5.5
1017	2	3	2	1	2	3	3	1	1	2	4	4	5	3	3	5	4	4	4	4	4	4	4	4	4	4	4	4	4	4	4	4	4	4	4	4	4	4	4	4	4	4	4	无	3.75	4.25	4	4	4
1018	1	1	3	1	2	3	3	1	1	1	1	7	7	7	7	7	7	7	7	7	7	7	7	7	7	7	7	7	7	7	7	7	7	7	7	7	7	7	7	7	7	7	7	无	7	7	7	7	7
1019	1	1	1	1	4	2	1	2	2	1	1	6	5	5	5	5	5	5	5	5	5	5	5	5	5	5	5	5	5	5	5	5	5	5	5	5	6	6	6	6	5	6	5	无	5.25	5	5	5.08333	5
1020	1	3	1	1	4	1	1	1	1	1	1	5	5	5	5	5	5	5	5	6	6	6	5	5	4	4	5	6	5	5	5	5	5	6	5	5	5	5	5	5	5	5	5	无	5	5	5.75	5.25	4.5
1021	1	1	1	1	3	1	1	2	1	3	4	4	4	4	4	4	4	4	4	4	4	4	4	4	4	4	4	4	4	4	4	4	4	4	4	4	4	4	4	4	4	4	4	无	4	4	4	4	4
1022	1	1	1	1	1	1	1	1	1	1	1	1	1	1	5	1	4	5	4	1	4	4	4	1	4	4	4	2	1	2	2	1	2	2	2	2	2	2	2	1	1	1	1	无	2	3.5	3.25	2.91667	3.25
1023	2	3	5	1	3	1	1	1	2	1	1	7	6	6	5	6	5	7	6	6	5	5	5	6	6	5	4	5	6	5	6	4	5	5	6	4	5	5	5	5	5	5	5	无	6	6	5.25	5.75	5.25
1024	1	1	1	1	4	2	1	3	1	2	1	7	7	7	7	7	7	7	7	7	7	7	7	7	7	7	7	7	7	7	7	7	7	7	7	7	7	7	7	7	7	7	7	无	7	7	7	7	7
1025	2	1	1	1	4	1	1	1	2	1	1	5	3	5	5	2	4	3	4	4	5	4	5	3	4	4	4	6	4	4	3	3	4	3	4	4	4	4	4	5	4	4	3	无	4.5	3.25	4.5	4.08333	3.75
1026	2	2	2	1	3	2	3	3	2	1	1	7	5	6	7	6	7	5	6	7	6	6	6	6	6	6	7	7	6	6	5	7	6	5	6	6	7	6	6	6	7	5	6	无	6.25	6	6.25	6.16667	6.25
1027	2	1	5	2	3	1	1	1	2	3	4	4	4	4	4	4	4	4	4	4	4	4	4	4	4	4	4	4	4	4	4	4	4	4	4	4	4	4	4	4	4	4	4	没有	4	4	4	4	4
1028	2	1	1	1	4	2	1	1	1	1	1	4	4	4	4	4	4	4	4	4	4	4	4	4	4	4	4	4	4	4	4	4	4	4	4	4	4	4	4	4	4	4	4	无	4	4	4	4	4
1029	1	1	1	1	2	2	2	2	2	2	4	4	4	4	4	4	4	4	4	4	4	4	4	3	1	4	3	5	4	4	5	4	7	4	4	4	7	7	7	4	3	4	3	无	4	4	4	4	2.75
1030	1	1	3	1	4	1	2	3	1	1	1	7	7	7	7	7	6	7	6	6	7	6	6	6	6	6	6	7	7	7	7	7	6	7	7	7	6	7	7	6	6	7	6	多一些实践	7	6.5	6.25	6.58333	6
1031	2	2	2	1	3	1	1	2	1	1	1	5	5	5	5	5	5	5	5	5	5	5	5	5	5	5	5	5	5	5	5	5	5	5	5	5	5	5	5	5	5	5	5	无	5	5	5	5	5
1032	2	3	2	1	4	1	1	3	1	1	1	2	2	3	6	5	3	4	5	3	5	4	3	4	4	4	3	6	4	5	6	5	5	3	5	3	5	3	5	4	4	4	4	无	3.25	4.25	3.75	3.75	3.75
1033	2	1	3	1	4	1	1	3	2	2	1	5	4	6	6	6	4	6	6	7	6	6	6	5	5	5	5	7	4	6	5	2	7	4	5	7	6	6	6	6	6	6	6	这个专业让我对法律有了深刻的见解，可以，再深刻的教学，对标未来的就业。或者职业规划。	5.25	5.5	6.25	5.66667	5
1034	2	1	3	1	4	1	3	1	1	1	1	5	2	5	5	5	5	5	5	2	2	2	5	3	2	5	3	7	3	5	4	1	4	3	3	7	7	7	7	7	7	7	4	可以多出去实践吧，比如去法院参观，实地参观等等	4.25	5	2.75	4	3.25
1035	2	3	2	1	2	2	2	2	2	2	3	6	5	5	5	5	5	6	6	5	5	5	5	6	4	5	5	7	5	5	4	5	6	5	5	5	5	5	6	5	4	4	4	无	5.25	5.5	5	5.25	5
1036	1	1	5	1	4	2	2	2	2	2	4	3	4	4	4	4	4	4	3	3	3	3	4	4	4	4	4	4	4	4	4	4	4	4	4	4	4	4	4	4	4	4	4	无	3.75	3.75	3.25	3.58333	4
1037	1	1	3	1	4	1	1	3	2	2	2	7	7	4	7	7	7	7	7	4	4	4	7	7	7	7	7	7	4	4	4	4	7	5	7	7	4	7	7	4	7	7	7	无	6.25	7	4.75	6	7
1038	2	1	3	1	2	1	1	4	2	2	2	5	4	6	4	5	5	6	5	2	4	4	7	5	4	4	4	6	4	5	4	4	5	3	5	7	7	7	7	5	5	6	4	没有	4.75	5.25	4.25	4.75	4.25
1039	2	1	3	1	2	3	1	5	2	3	4	3	3	3	3	3	3	2	6	7	7	6	6	4	2	2	5	4	6	3	4	2	7	2	3	4	4	4	5	4	4	4	3	无	3	3.5	6.5	4.33333	3.25
1040	1	1	2	1	3	1	1	5	2	1	1	4	4	7	7	4	7	7	4	4	4	4	4	4	7	4	7	7	6	6	4	4	4	4	5	7	7	7	7	6	5	7	7	无	5.5	5.5	4	5	5.5
1041	2	1	1	1	4	1	1	3	2	1	1	4	2	3	2	3	3	4	4	3	3	3	3	3	3	3	3	4	3	3	3	3	3	4	3	4	4	4	5	4	4	4	4	无	2.75	3.5	3	3.08333	3
1042	2	3	2	1	2	3	2	1	1	2	1	4	4	4	4	4	4	4	4	4	4	4	4	4	4	4	4	4	4	4	4	4	4	4	4	4	4	4	4	4	4	4	4	无	4	4	4	4	4
1043	2	1	3	1	2	1	1	3	2	3	1	4	4	4	4	4	4	4	4	4	4	4	4	4	4	4	4	4	4	4	4	4	4	4	4	4	4	4	4	4	4	4	4	无	4	4	4	4	4
1044	2	1	3	1	3	2	2	2	2	1	4	4	4	4	4	4	4	4	4	4	4	4	4	4	4	4	4	4	4	4	4	4	4	4	4	4	4	4	4	4	5	5	5	无	4	4	4	4	4
1045	1	3	1	1	4	3	1	3	1	2	1	4	4	4	4	4	4	4	4	4	4	4	4	4	4	4	4	4	4	4	4	4	4	4	4	4	4	4	4	4	4	4	4	无	4	4	4	4	4
1046	1	3	1	1	2	2	1	1	1	2	4	4	4	4	4	4	4	4	4	4	4	4	4	4	4	4	4	4	4	4	4	4	4	4	4	4	4	4	4	4	4	4	4	无	4	4	4	4	4
1047	1	3	1	1	4	1	1	2	1	2	1	7	7	7	7	7	7	7	7	7	7	7	7	7	7	7	7	7	7	7	7	7	7	7	7	7	7	7	7	7	7	7	7	无	7	7	7	7	7
1048	1	1	3	1	4	1	1	2	1	1	1	2	4	3	2	2	2	2	2	2	2	2	2	2	2	2	2	2	2	2	2	2	2	2	2	2	2	2	2	2	2	2	2	无	2.75	2	2	2.25	2
1049	1	1	1	2	4	1	1	2	2	1	1	7	7	7	7	7	7	7	7	7	7	7	7	7	7	7	7	7	7	7	7	7	7	7	7	7	7	7	7	7	7	7	7	没	7	7	7	7	7
1050	2	1	1	1	4	1	1	1	2	1	1	4	3	5	4	3	3	4	4	4	4	4	7	4	4	4	4	4	4	4	4	4	4	4	4	4	4	4	4	4	4	4	4	无	4	3.5	4.75	4.08333	4
1051	1	3	1	1	3	1	1	5	2	2	1	5	5	5	5	5	5	5	5	5	5	5	5	5	5	5	5	5	5	5	5	5	5	5	5	5	5	5	5	5	5	5	5	无	5	5	5	5	5
1052	2	3	2	1	2	2	1	1	1	1	4	7	7	7	7	7	7	7	7	7	7	7	7	7	7	7	7	7	7	7	7	7	7	7	7	7	7	7	7	7	7	7	7	无	7	7	7	7	7
1053	1	1	2	1	2	3	3	3	1	2	1	7	7	7	7	7	7	7	7	7	7	7	7	7	7	7	7	7	7	7	7	7	7	7	7	7	7	7	7	7	7	7	7	无	7	7	7	7	7
1054	2	1	2	1	2	1	2	2	1	1	4	3	3	3	3	3	3	3	2	2	2	2	3	2	2	2	2	2	2	2	2	3	2	2	2	2	2	3	3	2	1	1	1	无	3	2.75	2.25	2.66667	2
1055	2	1	5	2	4	1	1	3	2	2	4	6	5	6	7	6	5	6	5	5	5	6	4	6	5	4	6	6	4	6	4	6	5	4	5	5	6	5	6	6	4	5	5	无	6	5.5	5	5.5	5.25
1056	2	1	3	1	4	1	1	2	2	2	2	4	3	5	3	3	3	4	3	4	3	4	3	4	4	3	4	3	4	4	5	4	5	5	5	3	4	5	4	4	4	4	3	无	3.75	3.25	3.5	3.5	3.75
1057	1	1	5	1	4	1	1	3	1	2	4	5	5	5	5	5	5	5	5	5	5	5	5	5	5	5	5	5	5	5	5	5	5	5	5	5	5	5	5	5	5	5	5	无	5	5	5	5	5
1058	2	1	3	1	2	2	2	2	1	1	1	7	7	7	6	6	4	6	4	6	6	5	6	6	7	6	6	7	7	7	6	6	7	7	7	7	7	6	7	7	7	6	7	无	6.75	5	5.75	5.83333	6.25
1059	2	3	1	2	4	1	1	4	2	1	4	4	4	4	6	5	6	5	5	5	5	5	5	5	5	5	5	5	5	4	4	4	4	4	4	4	4	4	4	4	4	4	4	五	4.5	5.25	5	4.91667	5
1061	1	1	1	1	2	3	2	1	1	1	1	7	7	7	7	7	7	7	7	7	7	7	7	7	7	7	7	7	7	7	7	7	7	7	7	7	7	7	7	7	7	7	7	无	7	7	7	7	7
1062	2	1	4	1	4	1	1	5	2	2	1	3	3	3	6	3	3	6	3	3	3	3	3	3	3	3	3	3	3	3	3	3	3	3	3	3	3	3	3	3	3	3	3	无	3.75	3.75	3	3.5	3
1063	2	1	1	1	1	1	1	1	1	1	1	1	3	1	1	1	3	3	3	1	3	3	5	1	3	4	5	1	3	4	5	1	3	5	4	1	3	5	4	3	2	2	2	无	1.5	2.5	3	2.33333	3.25
1064	1	1	3	1	3	1	2	3	2	1	1	4	4	4	4	4	4	4	4	4	4	4	4	4	4	4	4	4	4	4	4	4	4	4	4	4	4	4	4	4	4	4	4	无	4	4	4	4	4
1065	1	1	5	1	4	1	1	5	2	3	4	3	2	3	4	4	5	3	5	5	6	5	4	5	5	6	6	4	5	6	7	5	4	5	5	5	5	6	6	4	5	5	5	无	3	4.25	5	4.08333	5.5
1066	2	1	3	1	4	1	1	1	1	1	1	1	1	1	1	1	1	1	1	1	1	1	1	1	1	1	1	1	1	1	1	1	1	1	1	1	1	1	1	1	1	1	1	无	1	1	1	1	1
1067	2	1	1	1	4	1	1	1	1	2	1	4	3	5	4	4	3	5	5	4	4	4	5	4	5	5	5	4	4	4	4	4	5	5	5	5	5	5	5	4	4	5	4	无	4	4.25	4.25	4.16667	4.75
1068	2	1	3	1	4	1	1	2	2	1	1	5	5	5	5	5	5	5	5	5	5	5	5	5	5	5	5	6	6	6	6	6	6	6	6	6	6	6	6	6	6	6	6	。	5	5	5	5	5
1069	1	3	1	2	4	1	1	2	1	2	4	7	7	7	7	7	7	7	7	7	7	7	7	7	7	7	7	7	7	7	7	7	7	7	7	7	7	7	7	7	7	7	7	无	7	7	7	7	7
1070	1	1	3	1	4	1	1	5	1	2	1	2	2	4	7	7	7	7	7	4	4	4	4	4	4	4	4	5	5	4	5	4	3	2	2	7	7	7	7	7	7	7	7	多开展实践	3.75	7	4	4.91667	4
1071	1	1	5	1	1	2	2	4	1	1	1	4	4	4	4	4	4	4	4	4	4	4	4	4	4	4	4	4	4	4	4	4	4	4	4	4	4	4	4	4	4	4	4	无	4	4	4	4	4
1072	2	3	2	1	4	1	1	1	1	1	1	7	7	7	7	7	7	7	7	7	7	7	7	7	7	7	7	7	7	7	7	7	7	7	7	7	7	7	7	7	7	7	7	暂时没有	7	7	7	7	7
1073	1	1	5	1	2	2	2	3	2	2	4	3	3	3	3	4	3	4	3	3	3	3	3	3	3	3	3	3	3	3	3	3	3	3	3	3	3	3	3	3	3	3	3	无	3	3.5	3	3.16667	3
1075	2	1	5	1	2	2	2	3	2	1	1	7	7	7	7	7	7	7	7	7	7	7	7	7	7	7	7	7	7	7	7	7	7	7	7	7	6	7	7	7	7	7	7	认识不清晰	7	7	7	7	7
1076	2	3	2	1	4	1	1	3	1	1	1	4	4	4	4	4	4	4	4	4	4	4	4	4	4	4	4	4	4	4	4	4	4	4	4	4	4	4	4	4	4	4	4	无	4	4	4	4	4
1077	2	1	5	2	1	2	2	1	2	1	1	4	4	4	4	4	4	4	4	4	4	4	4	4	4	4	4	4	4	4	4	4	4	4	4	4	4	4	4	4	4	4	4	无	4	4	4	4	4
1078	1	1	3	1	2	2	3	2	1	1	2	7	5	7	6	6	5	7	7	7	7	7	7	5	5	7	7	7	6	5	5	5	7	5	5	7	7	7	7	7	6	6	5	无	6.25	6.25	7	6.5	6
1079	1	1	5	1	4	1	1	4	2	2	1	6	3	5	4	6	6	5	5	6	6	6	6	5	5	4	4	5	4	4	4	3	4	3	4	6	6	6	6	6	6	6	6	无	4.5	5.5	6	5.33333	4.5
1080	2	1	2	1	4	3	2	1	1	1	4	7	5	4	7	4	4	5	5	5	5	5	5	4	4	4	4	7	5	4	5	3	7	6	6	5	5	5	6	5	5	5	4	无	5.75	4.5	5	5.08333	4
1081	2	1	5	1	2	2	2	3	1	2	1	7	7	7	7	7	7	7	7	7	7	7	7	7	7	7	7	7	7	7	7	7	7	7	7	7	7	7	7	7	7	7	7	无	7	7	7	7	7
1082	1	1	5	1	4	1	1	4	2	1	1	6	5	4	4	5	4	4	3	3	3	3	3	3	4	3	4	6	4	3	3	3	2	2	5	6	6	6	6	4	4	4	3	无	4.75	4	3	3.91667	3.5
1083	1	1	1	1	3	1	1	4	2	1	1	4	4	4	4	3	3	3	3	5	5	6	5	3	4	3	4	3	4	3	5	5	6	5	6	5	4	4	4	5	6	5	6	无	4	3	5.25	4.08333	3.5
1084	2	3	5	1	4	1	1	3	2	3	1	4	2	4	5	4	4	5	5	4	4	5	5	5	5	5	5	6	3	4	1	1	2	2	5	5	5	5	5	5	5	5	5	无	3.75	4.5	4.5	4.25	5
1085	2	3	2	1	4	1	1	2	2	3	1	5	5	5	5	5	5	5	5	5	5	5	5	5	5	5	5	5	5	5	5	5	5	5	5	5	5	5	5	5	5	5	5	无	5	5	5	5	5
1086	1	1	1	1	4	1	1	4	2	2	4	5	2	4	6	3	2	5	5	4	4	2	6	4	4	5	4	6	4	6	2	2	6	6	4	5	4	6	6	4	5	6	4	无	4.25	3.75	4	4	4.25
1087	2	3	2	1	2	3	2	4	2	3	4	7	7	7	7	7	7	7	7	7	7	7	7	7	7	7	7	7	7	7	7	7	7	7	7	7	7	7	7	7	7	7	7	无	7	7	7	7	7
1088	2	1	5	1	4	1	1	2	2	3	4	5	5	5	6	6	6	5	5	3	4	5	5	5	5	5	5	7	6	6	6	4	7	6	6	7	7	7	7	6	6	6	6	无	5.25	5.5	4.25	5	5
1089	1	1	2	2	2	2	4	2	2	2	2	6	6	5	5	5	4	4	4	5	5	5	5	7	5	5	6	4	5	5	5	5	5	5	5	6	5	5	5	6	5	5	5	无	5.5	4.25	5	4.91667	5.75
1090	2	3	2	1	4	1	2	1	2	2	3	4	4	3	6	4	3	4	4	4	4	4	4	5	5	6	6	5	4	5	4	3	4	4	5	4	4	5	6	4	4	5	4	无	4.25	3.75	4	4	5.5
1091	1	1	1	1	4	2	2	2	1	1	1	7	1	7	7	4	4	4	4	4	4	4	4	4	4	4	4	4	4	5	4	5	5	3	5	5	7	5	4	5	5	4	4	暂时没有	5.5	4	4	4.5	4
1092	2	4	2	1	4	1	2	4	1	1	3	5	5	5	5	5	5	5	5	5	5	5	5	5	5	5	5	5	5	5	5	5	5	5	5	5	5	5	5	5	5	5	5	无	5	5	5	5	5
1093	1	2	2	1	4	1	1	1	1	1	1	7	7	7	7	7	7	7	7	7	7	7	7	7	7	7	7	7	7	7	7	7	7	7	7	7	7	7	7	7	7	7	7	无	7	7	7	7	7
1094	2	1	3	1	3	1	1	2	1	1	3	4	5	5	5	4	4	5	4	4	4	4	4	6	6	6	6	7	7	7	4	4	5	7	7	7	7	7	7	7	7	7	7	无	4.75	4.25	4	4.33333	6
1095	2	3	2	1	4	2	2	1	1	1	4	6	5	6	5	7	6	7	4	5	5	6	6	5	5	6	6	5	6	6	7	6	6	6	6	6	6	6	6	6	6	6	6	无	5.5	6	5.5	5.66667	5.5
1096	1	3	5	1	3	2	2	4	1	1	1	5	6	5	6	6	5	5	5	5	6	6	5	5	6	5	6	6	5	5	5	6	6	7	6	7	7	7	7	6	6	7	6	无	5.5	5.25	5.5	5.41667	5.5
1097	2	1	3	1	2	2	2	4	2	1	2	4	4	4	4	4	4	4	4	4	4	3	4	4	5	5	4	4	5	4	4	4	5	4	4	3	4	4	4	4	5	4	4	无	4	4	3.75	3.91667	4.5
1098	1	3	1	1	2	3	2	1	2	2	1	6	4	7	6	5	5	5	5	6	6	6	6	6	7	7	7	7	7	7	7	7	7	7	7	7	7	7	7	7	7	7	7	无	5.75	5	6	5.58333	6.75
1099	2	3	2	1	4	1	1	2	2	2	2	5	5	5	5	5	5	5	5	5	5	5	5	5	5	5	5	5	5	5	5	5	5	5	5	5	5	5	5	5	5	5	5	。	5	5	5	5	5
1100	2	1	3	1	2	2	2	1	1	2	2	5	5	5	6	6	5	5	4	4	4	5	6	5	5	5	5	5	4	4	4	4	5	5	5	5	5	6	7	5	4	5	5	无	5.25	5	4.75	5	5
1101	2	1	5	1	4	1	1	3	2	3	1	7	5	5	6	5	5	4	4	6	5	5	6	6	5	5	6	5	5	6	6	5	5	6	5	5	6	4	3	4	6	4	3	无	5.75	4.5	5.5	5.25	5.5
1102	2	1	3	1	4	1	1	1	2	2	4	5	5	6	6	5	5	5	5	6	5	5	6	6	5	5	5	6	5	5	5	4	6	5	6	6	6	6	6	6	6	6	6	无	5.5	5	5.5	5.33333	5.25
1103	1	1	3	1	3	2	2	5	2	1	4	6	6	6	6	6	6	7	6	4	5	6	5	6	7	5	7	7	7	7	7	6	7	6	7	7	6	7	7	7	6	7	7	让我清楚价值定位，提升专业技能	6	6.25	5	5.75	6.25
1104	1	2	5	1	2	3	3	2	1	1	1	4	5	5	7	4	4	5	6	5	6	7	5	6	4	5	6	6	6	6	5	6	5	6	5	6	5	6	6	6	5	6	6	无	5.25	4.75	5.75	5.25	5.25
1105	2	1	3	1	3	2	3	3	1	1	3	4	3	3	4	3	3	5	4	4	4	3	4	4	3	5	4	7	4	4	4	3	4	6	4	5	5	4	5	5	4	5	5	无	3.5	3.75	3.75	3.66667	4
1106	2	1	2	2	4	2	2	2	2	1	4	4	4	3	3	4	4	4	4	4	4	4	4	4	4	4	4	4	4	4	4	4	4	4	4	4	4	4	4	4	4	4	4	无	3.5	4	4	3.83333	4
1107	1	1	3	1	1	3	3	1	1	1	4	4	4	4	4	4	4	4	4	4	4	4	4	4	4	4	4	7	7	7	7	7	7	7	7	7	7	7	7	7	7	7	7	无	4	4	4	4	4
1108	1	1	3	1	4	1	1	4	2	2	1	3	2	2	7	2	3	3	3	3	3	3	3	3	3	3	3	3	3	3	3	3	3	3	3	3	3	3	3	3	3	3	3	无	3.5	2.75	3	3.08333	3
1109	2	3	5	2	4	1	1	4	2	1	4	4	4	4	4	4	4	4	4	4	4	4	4	4	4	4	4	4	4	4	4	4	4	4	4	4	4	4	4	4	4	4	4	无	4	4	4	4	4
1110	2	3	2	1	2	2	2	2	2	2	1	4	4	4	4	4	4	4	4	4	4	4	4	4	4	4	4	4	4	4	4	4	4	4	4	4	4	4	4	4	4	4	4	无	4	4	4	4	4
1111	2	3	2	1	2	3	3	4	2	3	4	7	7	7	7	7	7	7	7	7	7	7	7	7	7	7	7	7	7	7	7	7	7	7	7	7	7	7	7	7	7	7	7	无	7	7	7	7	7
1112	2	3	2	1	2	2	3	4	2	1	4	4	4	4	4	4	4	4	4	4	4	4	4	4	4	4	4	4	4	4	4	4	4	4	4	4	4	4	4	4	4	4	4	无	4	4	4	4	4
1113	2	1	3	1	3	3	3	3	1	2	4	5	5	5	5	5	5	5	5	5	5	5	5	5	5	5	5	5	5	5	5	5	5	5	5	5	5	5	5	5	5	5	5	无	5	5	5	5	5
1114	1	1	3	1	4	1	1	3	2	2	2	2	2	2	2	2	2	2	2	2	2	2	2	2	2	2	2	2	2	2	2	2	2	2	2	2	2	2	2	2	2	2	2	无	2	2	2	2	2
1115	1	2	2	2	2	1	1	1	2	3	3	5	5	5	5	5	5	5	5	5	5	5	5	5	5	5	5	5	5	5	5	5	5	5	5	5	5	5	5	5	5	5	5	无	5	5	5	5	5
1116	1	3	2	1	4	1	1	4	2	2	1	4	3	4	5	4	3	4	4	3	5	3	4	4	5	4	4	4	4	5	4	4	4	4	4	4	4	5	4	4	5	4	3	无	4	3.75	3.75	3.83333	4.25
1117	2	2	2	2	1	4	4	4	2	1	1	7	7	7	7	7	7	7	7	7	7	7	7	7	7	7	7	7	7	7	7	7	7	7	7	7	7	7	7	7	7	7	7	无	7	7	7	7	7
1118	2	1	3	1	2	1	1	3	2	1	4	2	1	4	2	1	1	1	1	1	2	1	3	2	1	1	1	6	1	4	2	1	5	4	4	2	2	2	6	1	4	4	2	无，感觉没有方向	2.25	1	1.75	1.66667	1.25
1119	2	2	2	1	4	2	1	5	2	1	1	4	4	4	4	4	4	4	4	4	4	4	4	4	4	4	4	4	4	4	4	3	4	3	4	4	3	3	4	3	3	3	3	无	4	4	4	4	4
1120	2	1	3	1	4	1	1	1	1	1	1	7	7	7	7	7	7	7	7	7	7	7	7	7	7	7	7	7	7	7	7	7	7	7	7	7	7	7	7	7	7	7	7	都挺好的多参加一些活动	7	7	7	7	7
1121	2	1	3	1	4	1	1	5	2	1	4	4	3	4	4	4	3	3	3	3	3	4	4	3	3	3	3	4	4	3	3	2	4	4	4	3	3	4	4	3	3	3	3	无	3.75	3.25	3.5	3.5	3
1122	1	1	5	1	1	2	1	5	2	2	4	4	1	4	5	5	6	4	2	4	6	3	5	5	7	4	5	3	4	4	4	3	4	3	4	4	6	5	6	4	5	4	5	无	3.5	4.25	4.5	4.08333	5.25
1123	1	2	2	1	3	2	2	3	1	1	1	4	3	4	5	3	3	4	3	4	4	4	4	4	4	4	4	4	4	4	4	4	4	4	4	3	3	2	2	4	4	4	4	无	4	3.25	4	3.75	4
1124	1	2	2	1	4	1	1	4	2	3	3	4	4	4	4	4	4	4	4	4	4	4	4	4	4	4	4	4	4	4	4	4	4	4	4	4	4	4	4	4	4	4	4	无	4	4	4	4	4
1125	2	1	3	1	3	1	1	3	2	2	4	5	4	4	5	3	3	3	3	3	3	3	3	3	3	3	3	3	2	3	2	2	3	2	2	3	4	4	4	3	3	3	2	无	4.5	3	3	3.5	3
1126	2	1	2	1	2	2	1	3	2	2	4	4	5	6	5	7	5	5	5	5	6	6	6	4	5	5	5	5	5	5	5	5	5	5	5	5	5	5	5	5	5	6	5	无	5	5.5	5.75	5.41667	4.75
1127	1	2	2	1	2	2	1	3	1	1	2	5	5	5	5	5	5	5	5	5	5	5	5	5	5	5	5	5	5	5	5	5	5	5	5	5	5	5	5	5	5	5	5	无	5	5	5	5	5
1128	2	3	2	1	1	3	2	1	2	1	3	1	1	7	7	7	7	7	7	7	7	7	7	7	5	6	7	7	7	5	5	7	5	6	6	7	6	6	6	6	6	6	6	无	4	7	7	6	6.25
1129	2	1	5	1	3	1	1	2	2	2	4	6	5	3	5	4	6	3	5	5	5	4	5	5	4	4	3	5	3	5	5	5	6	5	6	6	6	6	6	6	5	5	6	无	4.75	4.5	4.75	4.66667	4
1130	2	3	1	1	4	1	1	1	1	2	4	4	4	4	4	4	4	4	4	4	4	4	4	4	4	4	4	4	4	4	4	4	4	4	4	4	4	4	4	4	4	4	4	挺好的	4	4	4	4	4
1131	2	1	5	1	4	1	1	1	2	1	1	4	3	3	3	4	1	4	3	4	3	4	4	4	4	4	4	4	4	4	4	4	4	4	4	4	4	4	4	5	5	5	5	无	3.25	3	3.75	3.33333	4
1132	2	3	2	1	2	1	1	1	1	1	1	5	5	5	5	5	5	5	5	5	5	5	5	5	5	5	5	5	5	5	5	5	5	5	5	5	5	5	5	5	5	5	5	都很好	5	5	5	5	5
1133	2	3	2	1	2	2	2	3	2	2	4	2	2	7	3	5	5	5	5	6	6	6	5	1	1	1	5	6	7	5	3	4	7	4	4	5	5	5	5	6	6	6	6	无	3.5	5	5.75	4.75	2
1134	1	1	1	1	4	1	1	2	2	1	4	7	1	1	6	1	1	1	1	1	1	1	1	1	2	1	1	1	1	1	1	1	1	1	1	1	1	1	1	1	1	1	1	无	3.75	1	1	1.91667	1.25
1135	2	1	1	1	4	1	1	2	2	1	1	7	7	7	7	7	7	7	7	7	7	7	7	7	7	7	7	7	7	7	7	7	7	7	7	7	7	7	7	7	7	7	7	无	7	7	7	7	7
1136	1	2	2	1	4	3	2	5	2	3	1	5	5	5	5	5	5	5	5	5	5	5	5	5	5	5	5	3	3	3	3	4	4	4	4	4	4	4	4	4	4	4	4	无	5	5	5	5	5
1137	1	2	2	1	2	3	2	3	1	2	1	7	7	7	6	6	5	5	5	5	5	5	5	5	6	6	5	5	6	5	5	6	6	6	7	7	7	7	7	7	7	7	7	无	6.75	5.25	5	5.66667	5.5
1138	2	2	5	1	4	2	2	2	2	1	4	4	4	4	4	4	4	4	4	4	4	4	4	4	4	4	4	4	4	4	4	4	4	4	4	4	4	4	4	4	4	4	4	🈚️	4	4	4	4	4
1139	2	2	2	1	4	1	2	5	2	1	1	5	4	5	1	4	4	4	4	4	4	4	4	4	4	4	4	4	4	4	4	4	4	4	4	4	4	4	4	4	4	4	4	无	3.75	4	4	3.91667	4
1140	2	3	2	1	2	2	2	3	2	2	1	4	5	5	4	5	5	5	4	5	4	5	4	5	4	5	6	5	4	5	5	5	4	5	5	4	5	5	4	5	4	5	4	。	4.5	4.75	4.5	4.58333	5
1141	2	2	2	1	2	1	1	1	1	1	1	6	4	4	5	5	5	5	5	5	5	5	5	5	5	5	5	5	5	5	5	5	5	5	5	5	5	5	5	5	5	5	5	无	4.75	5	5	4.91667	5
1142	1	2	1	2	3	2	3	4	2	1	1	5	5	5	5	5	5	5	5	5	5	5	4	4	4	5	4	4	4	4	4	4	4	4	4	5	5	5	5	5	5	5	5	无	5	5	4.75	4.91667	4.25
1143	1	2	2	1	4	1	1	4	2	2	1	4	4	4	4	5	5	5	5	4	4	4	4	4	4	4	4	5	5	5	5	5	5	5	5	5	5	5	5	5	5	5	5	无	4	5	4	4.33333	4
1144	1	1	2	1	4	1	1	3	2	2	1	4	4	4	4	4	4	4	4	4	4	4	4	4	4	4	4	4	4	4	4	4	4	4	4	4	4	4	4	4	4	4	4	无	4	4	4	4	4
1145	2	2	2	1	2	3	3	1	1	1	1	7	7	7	7	7	7	7	7	6	6	6	6	6	6	6	6	7	7	7	7	7	7	7	7	7	7	7	7	7	7	7	7	无	7	7	6	6.66667	6
1146	2	1	5	1	2	1	1	5	1	3	4	4	4	4	4	3	3	3	3	4	3	3	3	3	3	3	3	3	3	3	3	2	2	3	3	3	3	3	3	3	3	3	3	少做一些调查问卷	4	3	3.25	3.41667	3
1147	1	1	5	1	4	2	1	4	1	1	1	5	3	4	6	5	5	6	4	3	4	4	4	4	4	5	5	3	4	4	4	3	5	5	5	5	5	5	5	4	5	5	5	无	4.5	5	3.75	4.41667	4.5
1148	2	2	5	1	2	1	1	3	2	1	4	5	5	5	5	6	6	6	6	6	6	6	6	5	5	5	5	5	5	5	5	5	5	5	5	5	5	5	5	5	5	5	5	无	5	6	6	5.66667	5
1149	1	3	1	1	4	1	1	4	2	1	1	7	7	7	7	7	7	7	7	7	7	7	7	7	7	7	7	7	7	7	7	7	7	7	7	7	7	7	7	7	7	7	7	有帮助	7	7	7	7	7
1150	2	2	1	1	4	1	1	4	2	1	4	6	6	6	6	6	6	6	6	6	6	6	6	6	6	6	6	6	6	6	6	6	6	6	6	6	6	6	6	6	6	6	6	无	6	6	6	6	6
1151	1	3	2	1	2	2	1	4	2	1	1	4	4	4	4	3	3	5	4	3	3	3	4	4	3	5	3	5	3	3	4	3	4	3	3	3	3	3	3	4	3	3	3	课程脱离现实应用/工作	4	3.75	3.25	3.66667	3.75
1152	1	1	3	1	4	1	1	3	2	3	2	2	2	2	6	3	3	3	3	3	3	3	3	3	3	3	3	3	3	3	3	3	3	3	3	3	3	3	3	3	3	3	3	没有	3	3	3	3	3
1153	2	1	2	2	3	1	2	4	2	1	1	6	5	3	5	5	5	5	5	5	4	4	6	6	5	5	4	5	4	6	4	5	5	5	5	5	4	5	6	5	5	5	6	无	4.75	5	4.75	4.83333	5
1154	2	2	3	1	1	1	3	1	1	2	3	4	4	5	4	4	4	4	4	5	5	5	5	4	4	4	4	4	4	4	4	4	4	4	4	5	5	6	5	5	5	5	5	实践和专业有更高的契合度	4.25	4	5	4.41667	4
1155	1	1	1	1	4	1	1	1	1	2	1	7	7	7	7	7	7	7	7	7	7	7	7	7	7	7	7	7	7	7	7	7	7	7	7	7	7	7	7	7	7	7	7	希望大学生学历别贬值	7	7	7	7	7
1156	2	1	2	1	2	3	1	4	2	2	4	4	4	4	4	4	4	4	4	4	4	4	5	5	5	5	5	5	5	5	5	5	5	5	5	5	5	5	5	4	4	5	4	无	4	4	4.25	4.08333	5
1157	2	1	3	1	2	2	1	2	1	1	4	7	7	7	7	7	7	7	7	7	7	7	7	7	7	7	7	7	7	7	7	7	7	7	7	7	7	7	7	7	7	7	7	无	7	7	7	7	7
1158	2	1	2	1	2	2	2	4	2	1	2	7	7	7	7	7	7	7	7	7	7	7	7	7	7	7	7	7	7	7	7	7	7	7	7	7	7	7	7	7	7	7	7	无	7	7	7	7	7
1159	2	1	3	1	4	1	1	5	2	2	1	7	7	7	7	4	4	4	4	4	4	4	4	4	4	4	4	4	4	4	4	4	4	4	4	4	4	4	4	4	4	4	4	无	7	4	4	5	4
1160	2	3	2	1	3	2	2	3	2	1	1	5	5	5	5	6	5	5	5	5	6	5	5	5	5	5	5	7	6	5	5	5	5	5	5	5	5	5	5	5	5	5	5	无	5	5.25	5.25	5.16667	5
1161	2	2	2	1	2	2	2	1	2	2	1	7	7	4	7	4	4	4	6	3	6	6	3	4	4	4	4	7	3	5	3	1	1	7	7	5	4	4	4	4	4	4	4	无	6.25	4.5	4.5	5.08333	4
1162	2	1	5	2	2	1	1	3	2	1	1	4	2	3	4	3	3	3	3	3	3	3	3	4	4	5	4	4	4	5	5	2	2	2	4	3	3	2	4	5	5	5	5	无	3.25	3	3	3.08333	4.25
1163	2	1	2	1	4	1	1	1	2	1	1	6	4	5	5	3	4	4	4	4	5	3	4	6	3	5	5	6	7	6	4	4	5	6	6	4	6	4	5	5	4	4	2	我大概明白一些所学专业所面临的职业，但是我不知道从哪里开始实践去靠近这个职业	5	3.75	4	4.25	4.75
1164	1	1	5	1	3	2	2	5	2	3	1	7	7	7	7	7	7	7	7	7	7	7	7	7	7	7	7	7	7	7	7	7	7	7	7	7	7	7	7	7	7	7	7	无	7	7	7	7	7
1165	1	3	1	1	4	1	1	2	2	2	1	4	4	4	4	4	4	4	4	4	4	4	4	4	4	4	4	5	5	5	5	5	5	5	5	5	5	5	5	5	5	5	5	1	4	4	4	4	4
1166	2	1	2	1	4	1	1	3	2	1	3	7	7	7	7	7	7	7	7	7	7	7	7	7	7	7	7	7	7	7	7	7	7	7	7	7	7	7	7	7	7	7	7	没有	7	7	7	7	7
1167	2	3	2	1	4	1	2	3	2	2	1	5	4	3	4	4	5	3	4	5	4	5	2	3	3	3	3	5	2	4	1	2	6	3	4	4	6	4	5	4	4	4	3	面试会问哪些问题，需要先有工作、工资	4	4	4	4	3
1168	2	1	2	1	2	2	1	3	1	1	1	5	4	6	6	4	3	4	5	5	6	5	5	4	3	5	5	7	3	4	3	2	6	5	5	4	6	4	5	4	3	3	4	无	5.25	4	5.25	4.83333	4.25
1169	1	3	2	1	3	1	1	1	1	1	3	7	7	7	7	7	7	7	7	7	7	7	7	7	7	7	7	7	7	7	7	7	7	7	7	7	7	7	7	7	7	7	7	无	7	7	7	7	7
1170	2	2	2	1	2	3	2	1	1	1	1	7	7	7	7	6	7	7	6	6	6	6	6	6	6	4	5	6	6	6	6	6	6	6	6	6	6	6	6	6	6	6	6	1	7	6.5	6	6.5	5.25
1171	1	1	5	1	4	2	1	1	1	1	1	4	4	4	4	4	4	4	4	4	4	4	4	4	4	4	4	4	4	4	4	4	4	4	4	4	4	4	4	4	4	4	4	无	4	4	4	4	4
1172	2	2	2	1	4	2	1	1	1	1	1	7	7	7	7	7	7	7	7	7	7	7	7	7	7	7	7	7	7	7	7	7	7	7	7	7	7	7	7	7	7	7	7	没有不足	7	7	7	7	7
1173	1	3	1	1	4	1	2	2	2	1	1	4	4	4	4	4	4	4	4	4	4	4	4	4	4	4	4	4	4	4	4	4	4	4	4	4	4	4	4	4	4	4	4	无	4	4	4	4	4
1174	2	1	3	1	4	2	2	1	1	1	1	6	6	6	6	6	6	6	6	6	6	6	6	6	6	6	6	6	6	6	6	6	6	6	6	6	6	6	6	6	6	6	6	没有	6	6	6	6	6
1175	1	1	1	1	3	1	1	1	1	2	4	7	7	7	7	7	7	7	7	7	7	7	7	7	7	7	7	7	7	7	7	7	7	7	7	7	7	7	7	7	7	7	7	无	7	7	7	7	7
1176	2	3	2	1	4	2	1	2	1	1	4	7	3	7	7	7	7	7	7	7	7	7	7	7	2	7	7	7	7	7	7	4	7	7	7	7	7	4	7	7	7	7	7	无	6	7	7	6.66667	5.75
1177	1	1	3	2	4	1	1	5	1	2	4	3	2	2	2	2	2	2	2	2	4	2	3	3	3	2	3	3	2	3	2	3	2	3	2	3	2	3	2	2	3	2	3	无	2.25	2	2.75	2.33333	2.75
1178	2	1	3	1	4	1	1	3	2	3	4	2	2	2	2	3	3	2	2	2	2	2	3	2	2	2	3	6	3	3	3	2	2	3	2	3	3	3	3	2	3	3	2	无	2	2.5	2.25	2.25	2.25
1179	1	1	1	1	1	3	3	5	2	1	1	3	3	3	3	4	4	4	4	4	4	4	4	4	4	4	4	4	4	4	4	4	4	4	4	4	4	4	4	4	4	4	4	无	3	4	4	3.66667	4
1180	2	3	2	1	2	2	2	1	2	1	2	6	5	5	5	4	4	4	4	4	4	4	4	4	5	5	5	4	4	5	5	4	5	5	4	4	5	5	4	4	5	5	4	无	5.25	4	4	4.41667	4.75
1181	2	3	2	1	4	1	1	3	1	2	1	5	6	6	6	6	6	6	6	6	6	6	6	6	6	6	5	5	5	5	5	5	5	5	5	5	5	4	5	5	5	5	5	无	5.75	6	6	5.91667	5.75
1182	1	1	2	1	4	1	1	4	2	2	1	4	1	1	6	5	4	3	3	1	1	1	3	3	3	4	3	4	5	3	2	1	2	2	3	3	1	1	4	3	3	5	3	学校根本就没有这个实践，更不会搞科研	3	3.75	1.5	2.75	3.25
1183	2	3	2	1	4	3	1	3	1	2	2	7	7	7	7	7	7	7	7	7	7	7	7	7	7	7	7	7	7	7	7	7	7	7	7	7	7	7	7	7	7	7	7	没有	7	7	7	7	7
1184	2	3	2	1	4	2	1	1	1	1	1	5	5	5	5	4	4	4	4	4	4	4	4	5	5	5	5	5	5	5	5	5	5	5	5	6	6	6	6	6	6	6	6	无	5	4	4	4.33333	5
1185	2	2	2	1	3	1	1	3	2	1	1	5	5	5	5	5	5	5	5	5	5	5	5	5	5	5	5	5	5	5	5	5	5	5	5	5	5	5	5	5	5	5	5	没有	5	5	5	5	5
1186	1	3	2	1	4	2	2	1	1	2	1	7	7	7	7	7	7	7	7	7	7	7	7	7	7	7	7	7	7	7	7	7	7	7	7	7	7	7	7	7	7	7	7	无	7	7	7	7	7
1187	2	3	2	1	4	1	1	3	2	1	1	4	4	4	4	4	4	4	4	4	4	4	4	4	4	4	4	4	4	4	4	4	4	4	4	4	4	4	4	4	4	4	4	无	4	4	4	4	4
1188	2	1	2	1	4	1	1	3	2	2	1	4	6	3	4	4	3	5	4	4	4	5	4	4	4	4	5	5	5	5	4	5	4	5	4	4	5	5	5	6	3	4	5	无	4.25	4	4.25	4.16667	4.25
1189	2	2	1	1	4	2	2	2	2	1	4	7	7	7	7	5	5	6	5	6	5	6	5	6	5	6	5	6	5	6	5	6	5	6	5	6	5	6	5	6	5	6	5	无	7	5.25	5.5	5.91667	5.5
1190	2	3	2	1	2	2	2	3	2	1	4	7	7	7	7	7	7	7	7	7	7	7	7	7	7	7	7	7	7	7	7	7	7	7	7	7	7	7	7	7	7	7	7	无	7	7	7	7	7
1191	2	3	2	1	2	2	2	2	2	2	2	4	4	4	4	4	4	4	4	4	4	4	4	4	4	4	4	4	4	4	4	4	4	4	4	4	4	4	4	4	4	4	4	。	4	4	4	4	4
1192	2	3	2	1	4	1	1	3	2	1	1	1	1	1	1	2	1	1	1	4	2	1	3	2	3	3	3	3	3	3	2	2	2	2	2	3	2	2	2	3	3	3	2	无	1	1.25	2.5	1.58333	2.75
1193	2	3	2	1	3	1	1	3	2	3	1	5	4	5	3	6	4	6	3	6	3	6	3	6	3	6	3	6	3	6	3	6	3	5	3	5	3	6	3	5	3	5	5	无	4.25	4.75	4.5	4.5	4.5
1194	2	3	2	1	4	2	2	5	2	1	4	7	5	6	7	6	6	6	7	6	6	6	6	6	7	6	6	5	6	7	5	5	6	7	5	5	6	6	5	5	6	7	6	无	6.25	6.25	6	6.16667	6.25
1195	2	3	2	1	2	2	1	1	1	1	1	3	1	4	7	2	2	2	3	4	2	2	2	2	2	2	4	4	2	1	1	1	1	4	2	1	1	1	1	2	2	2	2	我害怕自己找不到工作	3.75	2.25	2.5	2.83333	2.5
1196	1	3	2	1	3	2	2	3	1	2	1	1	1	4	2	1	1	1	1	4	4	4	1	1	1	1	1	1	1	1	1	1	4	4	4	4	4	1	4	4	4	4	4	无	2	1	3.25	2.08333	1
1197	2	3	2	1	4	1	1	1	2	1	1	6	4	6	6	6	6	6	6	6	6	4	4	6	4	4	4	6	4	5	5	5	5	5	5	5	5	5	5	5	5	5	5	注重实践减少理论	5.5	6	5	5.5	4.5
1198	2	3	2	1	2	1	1	1	1	2	2	5	4	4	6	4	5	4	4	4	5	4	6	5	4	4	4	5	5	4	3	3	4	6	4	4	3	4	5	5	5	5	5	无	4.75	4.25	4.75	4.58333	4.25
1199	2	3	2	1	4	1	1	1	2	2	1	4	3	4	6	3	3	4	4	5	4	3	4	4	4	3	5	6	6	6	4	3	4	5	4	3	3	3	4	5	4	5	4	我认为课程设计可以再紧密一些，我想拥有更多的自主学习时间用于备考	4.25	3.5	4	3.91667	4
1200	2	2	5	1	4	1	1	2	2	2	1	5	4	5	6	4	5	5	7	5	4	5	5	5	4	5	4	4	4	5	3	5	4	5	4	5	6	5	4	4	5	4	4	暂无	5	5.25	4.75	5	4.5
1201	1	3	2	1	4	1	1	3	2	3	1	4	5	5	4	4	4	5	4	3	3	4	4	5	4	5	4	5	4	4	5	4	4	4	5	4	4	3	5	5	4	4	3	无	4.5	4.25	3.5	4.08333	4.5
1202	2	3	2	1	3	1	1	2	1	1	4	4	4	4	4	3	3	3	3	5	5	5	5	5	5	5	5	5	5	5	5	5	5	5	5	5	5	5	5	5	5	5	5	无	4	3	5	4	5
1203	2	3	2	1	3	2	1	2	2	2	1	5	5	6	6	5	5	6	6	5	4	5	6	4	5	4	6	6	5	6	5	4	5	6	4	6	5	6	5	6	5	5	5	无	5.5	5.5	5	5.33333	4.75
1204	2	3	2	1	4	1	1	1	1	2	4	4	4	4	4	4	4	4	4	4	4	4	4	4	4	4	4	7	6	6	6	4	4	4	4	4	4	4	4	4	4	4	4	嗯	4	4	4	4	4
1205	2	3	2	1	2	3	3	2	2	2	1	4	4	4	4	3	4	4	3	3	5	3	4	4	3	4	3	3	4	4	4	5	4	3	4	3	4	3	4	5	3	4	4	无	4	3.5	3.75	3.75	3.5
1206	1	1	3	1	4	2	2	2	2	2	2	5	5	5	5	5	5	6	3	4	5	4	5	5	4	5	5	5	4	5	5	5	4	5	5	5	5	6	6	6	5	6	6	继续进步	5	4.75	4.5	4.75	4.75
1207	1	3	2	1	2	3	3	5	2	3	4	4	2	7	7	6	6	6	6	7	7	1	7	7	7	7	7	5	7	1	1	5	5	1	1	1	1	1	5	3	5	5	5	无	5	6	5.5	5.5	7
1208	2	3	2	1	1	1	2	1	2	2	1	5	3	4	4	4	4	3	3	3	3	3	3	5	3	4	4	4	3	4	4	4	3	4	4	4	3	4	4	4	3	4	4	无	4	3.5	3	3.5	4
1209	2	2	1	1	4	2	1	1	2	1	4	7	7	7	7	4	7	7	7	5	5	5	5	6	6	6	6	6	6	6	6	6	6	6	6	6	6	6	6	6	6	6	6	无	7	6.25	5	6.08333	6
1210	2	3	2	1	2	1	1	3	2	3	1	5	5	5	5	4	4	4	4	4	4	4	4	4	4	4	4	4	4	4	4	4	4	4	4	4	4	4	4	4	4	4	4	无	5	4	4	4.33333	4
1211	2	3	2	1	1	1	1	1	1	3	1	6	6	6	6	6	6	6	6	6	6	6	6	6	6	6	6	6	6	6	6	6	6	6	6	6	6	6	6	6	6	6	6	无	6	6	6	6	6
1212	2	3	2	1	4	1	1	3	2	2	1	6	6	6	6	6	5	5	5	5	5	5	5	5	5	5	5	5	5	5	5	5	6	5	5	6	5	5	5	5	5	5	6	无	6	5.25	5	5.41667	5
1213	1	4	2	2	3	2	2	5	1	2	3	7	7	7	7	7	7	7	7	7	7	7	7	7	7	7	7	7	7	7	7	7	7	7	7	7	7	6	7	7	7	7	7	无	7	7	7	7	7
1214	1	4	2	2	4	1	1	2	1	1	1	4	4	4	4	4	4	4	4	4	4	4	4	4	3	5	5	5	4	3	3	3	5	4	5	4	4	4	4	4	4	4	4	无	4	4	4	4	4.25
1215	1	3	2	1	4	1	1	5	1	3	1	4	4	4	4	4	4	4	4	4	4	4	4	4	4	4	4	4	4	4	4	4	4	4	4	4	4	4	4	4	4	4	4	无	4	4	4	4	4
1216	1	3	2	1	4	1	1	2	1	1	1	7	7	7	7	7	7	7	7	7	7	7	7	7	7	7	7	7	7	7	7	7	7	7	7	7	7	7	7	7	7	7	7	1	7	7	7	7	7
1217	1	3	2	2	4	2	1	5	2	2	1	4	3	4	5	3	4	4	4	4	4	4	4	4	4	4	4	4	4	4	4	4	4	4	4	4	4	4	4	4	4	4	4	无	4	3.75	4	3.91667	4
1218	2	3	2	1	2	1	1	3	2	3	1	7	7	7	7	7	7	7	7	7	7	7	7	7	7	7	7	7	7	7	7	7	7	7	7	7	7	7	7	7	7	7	7	有	7	7	7	7	7
1219	2	1	3	1	3	1	1	4	2	2	1	7	7	7	7	7	7	7	7	7	7	7	7	7	7	7	7	7	7	7	7	7	7	7	7	7	7	7	7	7	7	7	7	无	7	7	7	7	7
1220	2	4	2	2	4	1	1	3	2	2	3	6	5	4	5	5	3	5	5	5	3	5	5	5	4	5	6	5	4	5	5	6	4	5	5	5	6	6	7	5	5	5	4	都很好	5	4.5	4.5	4.66667	5
1221	2	2	1	1	4	1	1	2	2	3	4	5	5	5	5	5	5	5	5	5	5	5	5	5	5	5	5	5	5	5	5	5	5	5	5	5	5	5	5	5	5	5	5	无	5	5	5	5	5
1222	1	3	2	1	4	1	1	3	2	2	1	4	5	5	4	5	5	4	5	6	7	6	6	5	6	5	5	6	5	6	4	5	5	5	5	4	4	4	5	5	4	6	6	无	4.5	4.75	6.25	5.16667	5.25
1223	2	2	1	1	3	1	1	1	2	1	1	6	5	5	5	5	4	4	5	5	5	5	5	5	4	5	5	5	5	5	5	4	4	4	4	5	4	5	4	5	5	5	5	无	5.25	4.5	5	4.91667	4.75
1224	2	4	2	2	4	2	1	1	2	2	2	2	5	3	7	3	2	2	2	3	2	2	3	6	4	3	4	3	2	2	2	2	2	3	4	1	2	1	5	2	2	3	2	对于本专业涉及到的相关行业及工作内容了解不足，以致于不确定职业规划，以及AI的迅速发展使我思考本专业的必要性	4.25	2.25	2.5	3	4.25
1225	2	3	2	1	4	1	1	2	2	2	1	5	5	5	4	5	5	5	5	4	5	3	5	5	3	5	5	5	4	4	5	5	4	5	5	5	5	4	5	6	4	4	5	无	4.75	5	4.25	4.66667	4.5
1226	2	2	1	2	2	2	2	2	2	2	2	7	5	5	5	3	3	3	4	3	4	4	4	4	4	4	4	5	5	5	5	5	5	5	5	5	5	5	5	5	5	5	5	无	5.5	3.25	3.75	4.16667	4
1227	1	1	5	1	4	1	1	4	2	2	2	2	3	2	3	4	3	3	4	3	4	3	4	4	4	4	4	2	4	3	3	5	4	3	3	4	3	4	3	4	3	4	4	无	2.5	3.5	3.5	3.16667	4
1228	1	4	2	2	2	1	2	3	1	2	3	7	5	6	7	5	4	7	5	5	5	5	5	5	5	5	5	5	5	6	6	4	6	4	6	7	7	7	7	7	7	7	7	无	6.25	5.25	5	5.5	5
1229	1	3	1	1	4	1	1	1	1	1	4	7	7	7	7	7	7	7	7	7	7	7	7	7	7	7	7	7	7	7	7	7	7	7	7	7	7	7	7	7	7	7	7	无	7	7	7	7	7
1230	1	3	1	1	4	2	2	3	2	3	1	4	4	4	4	4	4	4	4	4	4	4	4	4	4	4	4	4	4	4	4	4	4	4	4	4	4	4	4	4	4	4	4	无	4	4	4	4	4
1231	1	3	2	2	4	1	1	5	1	3	1	7	7	7	7	7	7	7	7	7	7	7	7	7	7	7	7	7	7	7	7	7	7	7	7	7	7	7	7	7	7	7	7	无	7	7	7	7	7
1232	2	4	2	2	2	2	1	2	2	2	2	4	4	4	4	4	4	5	4	3	4	5	4	4	5	4	3	4	5	4	4	4	5	4	4	4	3	5	5	4	5	4	4	无	4	4.25	4	4.08333	4
1233	2	1	1	1	3	1	1	1	2	1	2	7	7	7	7	7	7	7	7	7	7	7	7	7	7	7	7	7	7	7	7	7	7	7	7	7	7	7	7	7	7	7	7	无	7	7	7	7	7
1234	1	3	1	1	2	3	1	1	1	2	1	4	4	4	4	4	4	4	4	4	4	4	4	4	4	4	4	4	4	4	4	4	4	4	4	4	4	4	4	4	4	4	4	无	4	4	4	4	4
1235	1	3	1	1	4	1	1	2	2	2	4	4	4	4	4	5	4	5	4	5	4	5	4	5	4	5	4	4	5	5	4	5	4	5	5	4	5	5	4	4	5	5	4	无	4	4.5	4.5	4.33333	4.5
1236	2	4	2	2	3	1	1	4	2	2	2	3	2	5	4	2	2	1	3	3	2	3	3	2	1	2	3	6	2	4	2	1	5	1	5	1	2	2	2	2	1	2	1	可以多一些实践内容	3.5	2	2.75	2.75	2
1237	2	4	2	2	4	1	1	3	2	1	1	6	2	6	2	2	2	2	2	6	6	6	2	4	4	4	4	4	4	4	4	2	6	2	4	2	2	2	2	2	2	2	2	无	4	2	5	3.66667	4
1238	2	1	5	1	4	1	1	1	1	2	2	6	6	6	6	6	6	6	6	6	6	6	6	6	6	6	6	6	6	6	6	6	6	6	6	6	6	6	6	6	6	6	6	无	6	6	6	6	6
1239	1	3	1	1	4	1	1	4	2	1	1	4	6	5	5	4	4	4	4	5	5	6	5	5	5	6	4	5	5	4	5	4	5	5	5	5	6	5	6	5	5	5	5	无	5	4	5.25	4.75	5
1240	1	1	5	1	4	1	1	1	1	2	4	7	7	7	7	7	7	7	6	6	6	6	6	6	6	6	6	6	6	6	6	6	6	6	6	6	6	6	6	6	6	6	6	无	7	6.75	6	6.58333	6
1241	1	3	1	1	2	2	3	3	2	2	1	5	5	5	3	5	5	5	5	5	5	5	5	5	5	5	5	5	5	5	5	5	5	5	5	4	4	4	4	4	4	4	4	无	4.5	5	5	4.83333	5
1242	1	3	1	1	4	1	1	4	2	1	1	5	4	5	6	5	4	5	6	6	5	6	4	5	6	5	5	5	4	5	6	5	4	5	5	5	6	5	6	5	5	6	4	无	5	5	5.25	5.08333	5.25
1243	1	3	1	1	4	2	1	1	2	2	4	5	5	4	4	5	4	5	5	5	4	5	4	4	4	4	4	5	5	4	5	5	5	4	5	5	4	4	4	4	4	5	4	大学开设的课程，讲的内容与实际工作中完全不一样	4.5	4.75	4.5	4.58333	4
1244	2	3	2	1	2	3	3	2	2	1	1	7	7	7	7	7	7	7	7	7	7	7	7	7	7	7	7	7	7	7	7	7	7	7	7	7	7	7	7	7	7	7	7	无	7	7	7	7	7
1245	2	1	5	1	2	2	1	5	2	1	1	7	5	7	7	7	7	7	7	7	7	7	7	7	7	7	7	7	7	7	7	7	7	7	7	7	7	7	7	7	7	7	7	无	6.5	7	7	6.83333	7
1246	2	1	3	1	3	2	2	4	1	1	1	6	6	6	6	6	6	6	6	6	6	6	6	6	6	6	6	6	6	6	6	6	6	6	6	6	6	6	6	6	6	6	6	无	6	6	6	6	6
1247	2	4	2	2	2	1	2	3	1	1	1	4	4	4	4	4	4	4	4	4	4	4	4	4	4	4	4	4	4	4	4	4	4	4	4	4	4	4	4	4	4	4	4	无	4	4	4	4	4
1248	1	1	1	1	4	1	1	3	2	3	4	4	4	4	4	4	4	4	4	4	4	4	4	4	4	4	4	4	4	4	4	4	4	4	4	4	4	4	4	4	4	4	4	无	4	4	4	4	4
1249	1	1	1	1	4	1	1	3	2	1	1	7	7	7	7	5	7	7	7	7	7	7	7	7	7	7	4	7	5	7	4	7	7	7	7	7	7	7	7	7	7	7	4	无	7	6.5	7	6.83333	6.25
1250	1	3	1	1	4	1	1	3	2	1	4	4	4	4	4	4	4	4	4	4	4	4	4	4	4	4	4	4	4	4	4	4	4	4	4	4	4	4	4	4	4	4	4	无	4	4	4	4	4
1251	2	1	5	1	2	3	3	2	2	1	1	2	2	2	2	3	4	3	3	2	2	2	2	3	3	3	3	4	4	4	4	6	6	6	6	6	6	6	6	6	6	6	6	无	2	3.25	2	2.41667	3
1252	1	3	1	1	3	2	3	2	2	2	4	4	4	4	3	4	4	4	4	4	4	4	4	4	4	4	4	5	5	5	5	5	5	5	5	5	5	5	5	5	5	5	5	无	3.75	4	4	3.91667	4
1253	2	2	2	1	4	2	2	1	2	2	1	6	5	6	6	3	4	4	4	5	5	6	4	6	5	4	4	6	4	4	4	5	5	5	5	6	4	5	6	5	5	4	5	无	5.75	3.75	5	4.83333	4.75
1254	2	3	2	1	4	1	1	1	1	2	1	4	4	4	4	4	4	4	4	4	4	4	4	4	4	4	4	5	4	4	4	4	4	4	4	4	4	4	4	4	4	4	4	无	4	4	4	4	4
1255	1	3	2	1	2	2	1	4	1	3	1	5	2	5	5	5	5	5	5	5	5	5	5	4	6	4	6	5	6	6	6	6	5	6	5	3	2	1	3	6	6	6	6	缺少实习和培训阶段	4.25	5	5	4.75	5
1256	2	1	2	2	4	1	1	3	2	2	1	2	2	3	4	3	3	3	3	4	4	4	4	3	3	3	3	4	2	3	3	3	4	3	3	3	3	3	3	3	3	4	3	无	2.75	3	4	3.25	3
1258	2	3	2	2	4	2	1	1	2	2	1	4	4	4	5	4	4	4	5	4	4	4	3	4	4	4	5	4	5	4	4	4	5	4	5	5	4	5	4	4	4	4	4	无	4.25	4.25	3.75	4.08333	4.25
1259	2	1	2	1	4	2	1	3	2	2	1	2	2	3	3	3	2	2	3	2	2	2	2	2	2	2	2	6	2	2	2	1	2	1	1	2	2	1	2	2	2	2	2	无	2.5	2.5	2	2.33333	2
1260	2	1	1	1	3	1	1	3	2	3	1	4	4	4	4	4	5	5	4	3	3	3	3	4	4	4	4	5	4	3	3	3	5	3	3	5	5	5	6	3	4	4	3	无	4	4.5	3	3.83333	4
1261	2	1	2	1	2	2	2	1	1	1	3	6	6	5	5	5	5	5	5	5	5	5	5	5	5	5	5	6	6	6	6	4	6	6	6	6	6	6	6	6	6	6	6	无	5.5	5	5	5.16667	5
1262	2	3	2	1	4	3	3	3	2	1	1	4	4	4	4	4	4	4	4	4	4	4	4	4	4	4	4	4	4	4	4	4	4	4	4	4	4	4	4	4	4	4	4	。	4	4	4	4	4
1263	1	2	2	1	2	1	1	5	2	2	1	5	5	5	5	5	5	5	5	5	5	5	5	5	5	5	5	5	5	5	5	3	3	3	3	5	5	5	5	5	5	5	5	无	5	5	5	5	5
1264	1	1	5	1	2	2	2	4	2	1	1	7	7	7	7	7	7	7	7	7	7	7	7	7	7	7	7	7	7	7	7	7	7	7	7	7	7	7	7	7	7	7	7	无	7	7	7	7	7
1265	2	1	5	1	3	3	3	1	2	1	4	6	6	6	6	6	6	5	5	5	5	5	6	6	5	5	5	6	6	5	5	5	5	6	6	5	5	5	5	6	6	6	6	无	6	5.5	5.25	5.58333	5.25
1266	2	3	2	1	4	2	2	1	2	1	1	4	4	4	4	4	4	4	4	4	4	4	4	5	2	3	2	7	2	5	2	4	4	4	4	4	4	4	4	7	6	6	6	无	4	4	4	4	3
1267	1	3	1	1	2	2	2	2	2	3	1	1	1	1	1	1	1	1	1	1	1	1	1	1	1	1	1	1	1	1	1	1	1	1	1	1	1	1	1	1	1	1	1	1	1	1	1	1	1
1268	1	3	1	1	2	1	1	3	1	2	1	4	4	4	4	4	4	4	4	4	4	4	4	4	4	4	4	4	4	4	4	4	4	4	4	4	4	4	4	4	4	4	4	无	4	4	4	4	4
1269	1	3	2	1	2	1	1	3	2	1	2	5	6	5	6	6	5	6	6	6	5	6	6	5	4	4	6	6	5	5	4	6	4	6	5	6	5	6	6	6	6	5	6	无	5.5	5.75	5.75	5.66667	4.75
1270	1	1	1	1	3	2	2	3	2	2	1	7	7	7	7	7	7	7	7	7	7	7	7	7	7	7	7	7	7	7	7	7	7	7	7	7	7	7	7	7	7	7	7	无	7	7	7	7	7
1271	1	1	2	1	4	4	3	3	1	1	1	5	4	4	4	4	4	4	4	4	4	4	4	4	4	4	4	4	4	4	4	4	4	4	4	4	4	4	4	4	4	4	4	无	4.25	4	4	4.08333	4
1273	2	3	2	1	4	1	1	1	2	1	1	7	4	6	6	7	7	4	7	7	7	7	7	5	4	4	7	6	7	5	4	4	6	2	4	4	5	5	5	4	4	4	4	目前没考虑工作打算考研	5.75	6.25	7	6.33333	5
1274	2	1	5	2	3	2	2	4	2	2	1	6	4	4	4	4	5	5	5	4	5	5	4	4	4	4	4	4	4	4	4	4	4	4	4	4	4	4	4	4	4	4	4	无	4.5	4.75	4.5	4.58333	4
1275	2	1	1	1	3	2	3	2	2	2	2	5	4	5	4	4	5	5	4	5	4	4	5	4	6	5	3	5	4	4	3	5	4	4	4	4	4	4	5	5	4	4	3	无	4.5	4.5	4.5	4.5	4.5
1276	2	1	5	2	4	1	1	3	1	1	1	3	5	4	5	4	5	4	4	4	5	4	5	4	5	4	5	3	5	5	4	3	5	4	3	3	4	5	3	3	4	5	4	没有	4.25	4.25	4.5	4.33333	4.5
1277	2	1	5	1	2	1	1	1	1	2	1	4	5	5	5	4	5	5	5	5	5	5	5	5	5	5	5	5	5	5	5	5	5	5	5	5	5	5	5	5	5	5	5	无	4.75	4.75	5	4.83333	5
1278	2	1	5	1	3	2	2	2	2	1	4	7	7	7	7	7	7	6	6	6	6	5	6	6	6	6	5	6	5	7	6	4	5	4	5	5	5	4	4	5	6	6	5	无	7	6.5	5.75	6.41667	5.75
1279	1	2	1	1	2	1	2	1	2	1	1	7	7	7	7	7	7	7	7	7	7	7	7	6	6	6	7	6	6	6	6	6	7	6	6	7	7	7	6	6	6	6	7	无	7	7	7	7	6.25
1280	1	1	3	1	4	2	1	4	2	1	1	5	5	5	5	5	5	5	5	5	5	5	5	5	5	5	5	5	5	5	5	5	5	5	5	5	5	5	5	5	5	5	5	无	5	5	5	5	5
1281	2	1	1	1	3	2	1	2	1	2	1	5	5	5	5	3	4	5	3	3	4	4	4	4	4	4	4	4	4	4	4	4	4	4	4	4	4	4	4	4	4	4	4	无	5	3.75	3.75	4.16667	4
1282	2	1	1	1	3	1	1	3	1	2	4	3	3	3	3	3	3	3	3	3	3	3	3	3	3	3	3	3	3	3	3	3	3	3	3	3	3	3	3	3	3	3	3	无	3	3	3	3	3
1283	2	1	5	1	4	2	1	1	2	2	4	5	4	5	4	5	4	4	4	5	5	4	5	5	5	5	4	4	4	5	4	3	5	5	5	5	5	4	6	5	5	5	4	无	4.5	4.25	4.75	4.5	4.75
1284	2	1	1	1	2	1	1	2	2	3	1	5	4	4	4	4	4	4	4	4	4	4	4	7	7	3	7	5	2	2	1	1	5	4	4	4	5	4	5	2	4	4	3	无	4.25	4	4	4.08333	6
1285	2	1	3	1	2	3	2	2	1	3	4	3	3	4	4	3	4	4	4	4	4	4	4	5	5	5	5	6	6	7	7	4	4	4	5	5	5	6	5	6	5	5	6	无	3.5	3.75	4	3.75	5
1286	2	1	3	1	2	2	3	4	2	1	1	4	4	4	4	4	4	4	4	4	4	4	4	4	4	4	4	4	4	4	4	4	4	4	4	4	4	4	4	4	4	4	4	无	4	4	4	4	4
1287	2	1	5	1	3	1	1	3	2	2	1	4	4	4	4	3	5	5	5	6	6	5	5	4	5	5	4	4	5	4	4	4	4	4	5	5	4	4	5	5	4	4	5	无	4	4.5	5.5	4.66667	4.5
1288	1	1	1	1	2	1	1	5	1	1	4	7	7	7	7	7	7	7	7	7	7	7	7	7	7	7	7	7	7	7	7	7	7	7	7	7	7	7	7	7	7	7	7	无	7	7	7	7	7
1289	2	2	5	1	4	1	1	2	2	2	1	4	4	4	4	3	3	3	3	3	3	3	3	2	3	3	4	3	3	4	3	4	5	3	4	3	4	4	4	3	4	3	4	无	4	3	3	3.33333	3
1290	1	1	1	1	4	1	1	4	2	2	1	4	3	4	4	4	5	4	4	4	4	4	4	4	3	5	4	4	4	3	4	4	4	4	5	4	4	4	5	4	4	4	4	无	3.75	4.25	4	4	4
1291	2	1	5	1	4	2	2	1	2	1	1	7	7	7	7	7	7	7	7	7	7	7	7	7	7	6	6	6	6	7	7	7	7	7	7	7	7	7	7	7	6	6	7	无	7	7	7	7	6.5
1292	1	1	1	1	2	3	2	5	1	2	1	7	1	7	7	5	5	5	4	1	1	1	1	1	1	1	1	1	1	1	1	1	1	1	5	1	3	3	1	6	6	6	7	取消晚自习	5.5	4.75	1	3.75	1
1293	1	1	1	2	4	1	1	3	2	3	1	5	2	7	5	4	4	4	4	3	4	4	5	5	5	4	5	5	2	7	5	4	4	4	4	7	7	5	5	6	5	5	6	无	4.75	4	4	4.25	4.75
1294	1	1	1	1	4	2	2	3	2	1	4	7	1	5	7	2	2	2	4	4	4	4	4	4	4	4	4	4	3	4	4	4	4	4	4	4	4	4	4	4	4	4	4	无	5	2.5	4	3.83333	4
1295	1	1	1	1	4	1	1	2	2	3	4	4	1	6	7	6	5	5	5	6	4	7	7	6	6	4	6	4	7	6	4	7	7	5	5	5	7	7	5	7	5	7	5	无	4.5	5.25	6	5.25	5.5
1296	1	1	1	1	2	4	2	2	2	2	2	6	6	2	2	2	5	5	6	6	6	6	7	2	5	2	5	2	5	2	5	2	6	2	6	2	2	5	6	2	5	6	2	专业课在哪	4	4.5	6.25	4.91667	3.5
1297	1	1	1	1	1	2	2	1	2	1	1	6	6	6	6	6	6	6	6	6	6	6	6	6	6	6	6	6	6	6	6	6	6	6	6	6	6	6	6	6	6	6	6	无	6	6	6	6	6
1298	1	1	1	1	4	1	1	1	1	1	1	4	4	4	4	4	4	4	4	4	4	4	4	4	4	4	4	4	4	4	4	4	4	4	4	4	4	4	4	4	4	4	4	无	4	4	4	4	4
1299	1	1	1	1	4	1	1	2	2	3	1	2	2	2	2	2	3	2	3	2	1	2	3	2	1	2	2	2	3	2	1	2	1	2	2	2	2	2	2	3	1	2	1	无	2	2.5	2	2.16667	1.75
1300	2	4	2	1	2	2	2	4	1	2	3	4	4	4	4	4	4	4	4	4	4	4	4	4	4	4	4	4	4	4	4	4	4	4	4	4	4	4	4	4	4	4	4	无	4	4	4	4	4
1301	1	1	1	1	4	1	1	2	1	3	1	5	5	5	5	5	5	5	5	5	5	5	5	4	3	5	5	4	5	3	4	5	4	4	4	4	4	4	4	4	4	3	4	无	5	5	5	5	4.25
1302	1	1	1	1	4	1	2	4	2	3	4	4	4	4	4	4	4	4	4	4	4	4	4	4	4	4	4	4	4	4	4	4	4	4	4	4	4	4	4	4	4	4	4	行	4	4	4	4	4
1303	1	1	1	1	4	3	3	4	2	2	3	5	5	5	5	5	5	5	5	5	5	5	5	5	5	5	5	5	5	5	5	5	4	5	4	5	4	5	4	5	4	5	4	无	5	5	5	5	5
1304	1	1	1	1	4	1	1	3	2	1	4	5	5	5	5	5	5	5	5	5	5	5	5	5	5	5	5	5	5	5	5	5	5	5	5	5	5	5	5	5	5	5	5	无	5	5	5	5	5
1305	1	3	2	1	1	2	1	3	1	1	1	4	4	4	4	4	4	4	4	4	4	4	4	4	4	4	4	4	4	4	4	4	4	4	4	4	4	4	4	4	4	4	4	无	4	4	4	4	4
1306	1	1	2	1	4	2	2	4	2	2	1	4	4	4	4	4	4	4	4	4	4	4	4	4	4	4	4	4	4	4	4	4	4	4	4	4	4	4	4	4	4	4	4	无	4	4	4	4	4
1307	1	1	1	1	2	4	4	1	1	1	3	7	7	7	7	7	7	7	7	7	7	7	7	7	7	7	7	7	7	7	7	7	7	7	7	7	7	7	7	7	7	7	7	无	7	7	7	7	7
1308	2	2	5	1	4	1	1	3	2	1	1	6	6	7	7	6	6	7	5	5	6	6	6	6	6	4	5	7	5	5	6	5	4	4	6	6	6	6	6	6	5	6	5	无	6.5	6	5.75	6.08333	5.25
1309	1	1	1	1	2	3	2	3	2	1	1	5	5	5	5	5	5	5	5	5	5	5	5	5	5	5	5	5	5	5	5	5	5	5	5	5	5	5	5	5	5	5	5	无	5	5	5	5	5
1310	2	1	2	1	3	2	2	1	2	2	1	4	4	4	4	4	4	4	4	4	4	4	4	4	4	4	4	4	4	4	4	4	4	4	4	4	4	4	4	4	4	4	4	无	4	4	4	4	4
1311	1	1	2	1	2	3	3	5	2	2	1	3	3	3	3	3	3	3	3	5	5	5	5	5	5	5	5	5	6	4	6	6	4	6	7	7	7	7	6	6	7	6	6	无	3	3	5	3.66667	5
1312	1	1	1	1	3	1	1	3	2	3	4	5	1	2	4	2	2	2	2	2	2	2	2	2	2	2	2	2	2	2	2	2	2	2	2	2	2	2	2	2	2	2	2	无	3	2	2	2.33333	2
1313	2	1	5	1	2	3	3	3	2	2	1	2	2	2	2	2	2	2	2	2	2	2	2	2	2	2	2	2	2	2	2	2	2	2	2	2	2	2	2	2	2	2	2	无	2	2	2	2	2
1314	1	1	2	2	4	2	2	5	2	3	1	4	4	4	4	4	4	4	4	4	4	4	4	4	4	4	4	4	4	4	4	3	4	3	5	4	2	4	5	3	3	4	4	无	4	4	4	4	4
1315	2	1	2	1	2	2	2	2	2	2	1	5	4	5	5	5	5	4	5	4	5	5	4	5	4	5	5	5	4	5	5	4	5	5	5	6	5	6	5	6	5	6	6	无	4.75	4.75	4.5	4.66667	4.75
1316	2	1	2	1	3	1	2	4	2	2	1	4	4	4	4	4	4	4	4	4	4	4	4	4	4	4	4	4	4	4	4	4	4	4	4	4	4	4	4	4	4	4	4	无	4	4	4	4	4
1317	2	1	2	1	4	1	1	2	2	2	1	2	3	2	2	2	2	2	3	3	2	3	2	3	3	2	3	3	2	3	2	2	3	2	3	2	3	2	2	2	2	3	2	无	2.25	2.25	2.5	2.33333	2.75
1318	2	1	2	1	4	1	1	2	2	3	1	7	3	6	5	2	2	4	4	7	3	6	4	6	4	3	4	6	2	4	4	4	7	5	6	5	5	4	5	4	4	5	4	无	5.25	3	5	4.41667	4.25
1319	1	1	2	1	2	3	3	5	2	3	1	7	7	7	7	7	7	7	7	7	7	7	7	7	7	7	7	7	7	7	7	7	7	7	7	7	7	7	7	7	7	7	7	无	7	7	7	7	7
1320	1	1	2	1	4	1	1	2	1	1	1	4	4	4	4	4	4	4	4	4	4	4	4	4	4	4	4	4	4	4	4	4	4	4	4	4	4	4	4	4	4	4	4	。	4	4	4	4	4
1321	2	1	2	1	4	1	1	1	2	2	4	4	4	4	4	4	4	4	4	4	4	4	4	4	4	4	4	4	4	4	4	4	4	4	4	4	4	4	4	4	4	4	4	无	4	4	4	4	4
1322	2	1	2	1	3	1	1	2	1	2	1	2	2	3	4	2	2	3	3	2	3	2	3	3	3	3	3	3	2	3	2	2	2	3	3	3	3	4	4	3	4	4	3	无	2.75	2.5	2.5	2.58333	3
1323	2	1	2	1	2	1	1	2	1	3	1	7	2	7	4	4	3	4	7	5	4	4	4	4	4	4	4	4	4	4	4	4	4	4	4	4	4	4	4	4	4	4	4	无	5	4.5	4.25	4.58333	4
1324	1	3	5	1	4	1	1	5	2	3	1	7	7	7	7	7	7	7	7	7	7	7	7	7	7	7	7	7	7	7	7	7	7	7	7	7	7	7	7	7	7	7	7	好	7	7	7	7	7
1325	1	1	1	1	3	2	2	1	2	3	1	7	7	7	7	7	7	7	7	7	7	7	7	7	7	7	7	7	7	7	7	7	7	7	7	7	7	7	7	7	7	7	7	无	7	7	7	7	7
1326	2	1	5	2	1	4	4	1	2	1	1	7	7	7	7	7	7	7	7	7	7	7	7	7	7	7	7	7	7	7	7	7	7	7	7	7	7	7	7	7	7	7	7	好	7	7	7	7	7
1327	2	1	2	1	2	3	3	1	1	1	1	6	6	6	6	6	6	6	6	6	6	6	6	6	6	6	6	6	6	6	6	6	6	6	6	6	6	6	6	6	6	6	6	无	6	6	6	6	6
1328	1	1	1	1	4	1	1	2	2	3	1	4	1	4	7	6	7	7	4	6	6	5	5	4	2	4	4	7	5	6	3	4	4	6	7	2	1	1	4	6	6	6	7	无	4	6	5.5	5.16667	3.5
1329	2	1	3	1	4	2	2	2	2	3	4	5	5	5	5	5	5	5	5	5	5	5	5	5	5	5	5	5	5	5	5	5	5	5	5	5	5	5	5	5	5	5	5	无	5	5	5	5	5
1330	1	1	1	1	4	1	2	4	2	2	1	4	4	4	4	4	4	4	4	4	4	4	4	4	4	4	4	4	4	4	4	4	4	4	4	4	4	4	4	4	4	4	4	.	4	4	4	4	4
1331	2	1	5	1	4	1	1	1	1	1	1	7	7	7	7	7	7	7	7	7	7	7	7	7	7	7	7	7	7	7	7	7	7	7	7	7	7	7	7	7	7	7	7	没有	7	7	7	7	7
1332	2	1	2	1	4	2	1	2	1	1	4	4	3	3	4	3	3	3	4	4	3	3	5	3	3	3	4	5	3	4	5	4	4	5	3	3	4	3	5	5	3	4	3	想了解该专业还有其余什么职业	3.5	3.25	3.75	3.5	3.25
1333	1	1	1	1	4	2	1	1	1	1	1	7	7	7	7	7	7	7	7	7	7	7	7	7	7	7	7	7	7	7	7	7	7	7	7	7	7	7	7	7	7	7	7	无	7	7	7	7	7
1334	1	1	1	1	4	2	1	5	2	2	1	4	4	4	4	4	4	4	4	4	4	4	4	4	4	4	4	4	4	4	4	4	4	4	4	4	4	4	4	4	4	4	4	无	4	4	4	4	4
1335	1	3	1	2	2	1	1	1	1	1	1	7	7	7	7	7	7	7	7	7	7	7	7	7	7	7	7	7	7	7	7	7	7	7	7	7	7	7	7	7	7	7	7	无	7	7	7	7	7
1336	2	1	3	1	4	1	1	3	2	2	1	4	3	3	4	3	3	4	3	4	4	4	4	4	4	4	4	4	4	4	4	4	4	4	4	4	4	4	4	4	4	4	4	无	3.5	3.25	4	3.58333	4
1337	1	1	1	1	4	1	1	2	2	2	3	4	3	6	3	2	2	2	2	2	2	1	2	2	2	2	2	2	1	2	2	2	2	2	1	2	2	2	2	2	2	1	2	多一些实际的少一些假大空的	4	2	1.75	2.58333	2
1338	1	3	1	1	4	1	1	3	2	2	1	7	7	7	7	7	7	7	7	7	7	7	7	7	7	7	7	7	7	7	7	7	7	7	7	7	7	7	7	7	7	7	7	很好了	7	7	7	7	7
1339	2	4	2	2	2	2	2	4	2	1	1	7	7	7	7	7	7	7	7	7	7	7	7	7	7	7	7	7	7	7	7	7	7	7	7	7	7	7	7	7	7	7	7	无	7	7	7	7	7
1340	1	1	2	1	1	1	1	1	1	1	1	7	7	7	7	7	7	7	7	7	7	7	7	7	7	7	7	7	7	7	7	7	7	7	7	7	7	7	7	7	7	7	7	好	7	7	7	7	7
1341	1	1	1	1	4	4	4	5	2	3	4	5	5	5	5	5	5	5	5	5	5	5	5	5	5	5	5	5	5	5	5	5	5	5	5	5	5	5	5	5	5	5	5	1	5	5	5	5	5
1342	1	3	1	1	3	2	2	3	2	2	1	1	1	1	1	5	4	4	4	4	4	4	4	4	4	4	4	4	4	4	4	4	4	4	4	4	4	4	4	4	4	4	4	无	1	4.25	4	3.08333	4
1344	1	1	1	1	4	1	1	1	1	1	1	6	6	6	6	6	6	6	6	6	6	6	6	6	6	6	6	6	6	6	6	6	6	6	6	6	6	6	6	6	6	6	6	无	6	6	6	6	6
1345	1	3	1	1	4	2	1	5	2	1	4	1	1	1	1	1	1	1	1	1	1	1	1	1	1	1	1	1	1	1	1	1	1	1	1	1	1	1	1	1	1	1	1	无	1	1	1	1	1
1346	2	1	5	1	4	3	2	5	2	1	4	5	5	5	5	5	5	5	5	5	5	5	5	5	5	5	5	5	5	5	5	5	5	5	5	5	5	5	5	5	5	5	5	。	5	5	5	5	5
1347	2	2	3	1	2	1	1	2	1	3	1	5	5	4	4	3	1	2	2	2	1	1	3	4	3	4	2	3	3	5	2	2	4	2	3	1	1	1	4	3	3	3	3	切实际一点，感觉到最后还是要考研考公，职业教育也是，那这样的意义又有什么呢，现在不仅仅只有我很气馁	4.5	2	1.75	2.75	3.25
1348	2	2	3	1	4	2	2	2	2	3	3	4	4	4	4	4	4	4	4	4	4	4	4	4	4	4	4	4	4	4	4	4	4	4	4	4	4	4	4	4	4	4	4	无	4	4	4	4	4
1349	2	2	3	1	2	1	1	3	1	1	1	7	5	7	7	5	5	5	5	5	5	5	5	5	5	5	5	7	7	7	7	7	7	7	7	7	7	7	7	7	7	7	7	继续努力	6.5	5	5	5.5	5
1350	2	2	3	1	2	2	2	2	1	1	1	7	7	7	7	7	6	6	7	7	6	7	7	6	6	7	7	6	7	7	7	7	7	7	7	7	7	7	7	7	7	7	7	2. 教学方式：部分理论课程仍以课堂讲授为主，互动性、实践性不足；针对不同就业方向（如机关党务、国企党建、高校党建、基层社区党建）的差异化教学不足，难以满足个性化职业规划需求。 3. 实践环节：实践岗位类型单一，多集中于传统基层党建，缺乏机关、国企、两新组织等多元场景的实践机会；实践指导的专业性不足，部分实习缺乏系统的带教与考核，难以实现能力的精准提升。	7	6.5	6.75	6.75	6.5
1351	1	1	2	1	4	1	1	5	2	3	1	5	5	5	5	5	5	5	5	5	5	5	5	5	5	5	5	5	5	5	5	5	5	5	5	5	5	5	5	5	5	5	5	无	5	5	5	5	5
1352	2	4	2	1	4	1	1	3	2	1	2	5	4	5	6	5	4	5	6	5	4	5	6	5	4	5	6	5	5	4	6	5	4	5	6	5	4	5	6	5	4	5	6	无	5	5	5	5	5
1353	1	3	1	1	4	1	1	1	2	2	1	3	3	3	5	5	5	5	5	5	5	5	5	6	6	6	6	6	6	6	6	6	6	6	6	6	6	6	6	6	6	6	6	无	3.5	5	5	4.5	6
1354	1	3	1	1	1	1	1	3	2	1	1	1	1	1	1	1	1	1	1	1	1	1	1	1	1	1	1	1	1	1	1	1	1	1	1	1	1	1	1	1	1	1	1	无	1	1	1	1	1
1355	1	2	3	1	4	2	1	5	2	3	4	1	1	1	1	1	1	1	1	1	1	1	1	1	1	1	1	7	7	2	7	1	7	7	7	1	1	1	7	2	2	2	2	无	1	1	1	1	1
1356	2	2	3	1	1	3	2	1	1	1	3	7	7	7	6	7	7	7	7	7	7	7	7	7	7	7	7	7	7	7	7	7	6	7	6	7	6	7	6	7	7	6	6	大学生普遍对未来职业很迷茫希望学校，不只盯着高质量就业的定位而是帮学生拓展自己的兴趣爱好以及自己未发现的领域探索	6.75	7	7	6.91667	7
1357	2	2	3	1	4	1	1	5	2	3	1	3	2	3	2	4	2	3	2	3	3	3	3	2	2	4	3	4	4	3	3	4	4	3	4	3	3	3	3	3	4	3	4	无	2.5	2.75	3	2.75	2.75
1358	2	2	3	1	2	2	2	2	2	3	4	4	4	4	4	4	4	4	4	4	4	4	4	4	4	4	4	4	4	4	4	4	4	4	4	4	4	4	4	4	4	4	4	无	4	4	4	4	4
1359	2	2	3	1	4	1	1	4	2	3	1	5	5	5	5	5	5	5	5	4	5	5	5	4	4	4	4	5	5	5	5	3	3	3	3	5	5	5	5	5	5	5	5	无	5	5	4.75	4.91667	4
1360	1	3	1	1	2	3	1	2	2	1	1	7	7	7	7	7	7	7	7	7	7	7	7	7	7	7	7	7	7	7	7	7	7	7	7	7	7	7	7	7	7	7	7	无	7	7	7	7	7
1361	2	2	3	1	4	3	1	2	1	1	4	6	6	6	6	4	4	4	4	4	4	4	4	5	5	3	5	4	3	5	5	5	6	5	6	5	5	5	5	5	5	5	5	一对一教学	6	4	4	4.66667	4.5
1362	1	3	1	1	4	2	2	2	2	3	4	3	2	2	4	2	2	2	2	2	2	2	2	2	2	2	2	2	2	2	2	2	2	2	2	2	1	2	2	2	2	2	2	无	2.75	2	2	2.25	2
1363	2	2	3	1	1	2	1	2	1	2	3	5	5	5	5	4	4	4	4	4	4	4	4	4	4	4	4	4	4	4	4	4	4	4	4	4	4	4	4	4	4	4	4	🈚️	5	4	4	4.33333	4
1364	1	3	1	1	3	1	1	4	1	2	1	4	2	3	3	2	2	4	2	4	4	4	4	3	1	1	1	6	3	3	1	2	1	2	2	3	3	3	3	3	3	3	3	无	3	2.5	4	3.16667	1.5
1365	2	3	2	1	2	1	1	5	2	3	1	5	4	4	4	4	4	4	4	4	4	4	4	4	4	4	4	4	4	4	4	4	4	4	4	4	4	4	4	4	4	4	4	挺好的	4.25	4	4	4.08333	4
1366	2	2	2	1	4	1	2	5	2	1	2	4	4	4	4	4	6	4	6	4	5	3	3	5	4	4	4	7	5	4	3	1	5	1	6	4	4	4	4	5	4	4	3	无	4	5	3.75	4.25	4.25
1367	2	1	3	1	2	3	1	4	2	2	4	7	7	7	7	7	7	7	7	7	7	7	7	7	7	7	7	7	7	7	7	7	7	7	7	7	7	7	7	7	7	7	7	无	7	7	7	7	7
1368	2	1	5	1	4	3	3	2	2	2	1	3	4	6	6	6	6	6	6	5	5	5	4	3	5	4	5	3	5	3	2	2	5	2	5	2	2	2	2	3	3	3	3	无用课程多 不如直接边学习边去实习获得经验	4.75	6	4.75	5.16667	4.25
1369	1	3	1	1	4	1	2	1	1	1	4	3	2	3	3	2	3	2	3	2	2	3	2	2	2	2	2	3	3	3	2	1	4	3	2	1	1	1	1	3	2	2	2	多多给点实践机会	2.75	2.5	2.25	2.5	2
1370	1	3	1	1	2	1	1	2	1	1	1	7	7	7	6	7	7	7	7	7	7	7	7	7	7	6	7	6	6	6	6	6	6	6	6	6	6	6	6	6	6	6	6	无	6.75	7	7	6.91667	6.75
1371	1	1	1	1	4	1	1	1	1	1	1	1	1	1	1	1	1	1	1	1	1	1	1	1	1	1	1	1	1	1	1	1	1	1	1	1	1	1	1	1	1	1	1	无	1	1	1	1	1
1372	2	2	3	1	4	2	1	1	2	2	2	5	5	4	4	4	4	4	4	4	4	4	4	4	4	4	4	4	4	4	4	4	4	4	4	4	4	4	4	4	4	4	4	增加实践学习	4.5	4	4	4.16667	4
1373	2	2	1	1	2	3	2	3	2	2	1	6	6	6	6	6	6	6	6	6	6	6	6	6	6	6	6	6	6	6	6	6	6	6	6	6	6	6	6	6	6	6	6	无	6	6	6	6	6
1374	1	2	2	1	2	3	2	1	1	1	3	6	6	6	6	6	6	6	6	6	6	6	6	6	6	6	6	6	6	6	6	6	6	6	6	6	6	6	6	6	6	6	6	无	6	6	6	6	6
1375	2	2	3	1	4	1	1	2	2	2	1	6	6	6	6	6	6	6	6	6	6	6	6	6	6	6	6	5	5	5	5	5	5	5	5	5	5	5	5	5	5	5	5	无	6	6	6	6	6
1376	2	2	3	2	1	2	2	2	2	2	4	5	5	5	5	5	5	5	5	5	5	5	5	5	5	5	5	5	5	5	5	5	5	5	5	5	5	5	5	5	5	5	5	无	5	5	5	5	5
1377	2	2	3	2	2	3	2	3	2	1	4	7	7	7	7	7	7	7	7	7	7	7	7	7	7	7	7	7	7	7	7	7	7	7	7	7	7	7	7	7	7	7	7	无	7	7	7	7	7
1378	2	2	3	2	2	2	1	3	1	2	1	4	4	4	4	4	4	4	4	4	4	4	4	4	4	4	4	4	4	4	4	4	4	4	4	4	4	4	4	4	4	4	4	无	4	4	4	4	4
1379	1	2	3	2	4	1	1	4	1	2	1	4	4	4	4	4	4	4	4	4	4	4	4	4	4	4	4	4	4	4	4	4	4	4	4	4	4	4	4	4	4	4	4	无	4	4	4	4	4
1380	2	1	5	2	4	3	3	1	1	2	1	2	2	3	4	3	2	4	3	3	4	3	4	3	3	4	3	3	4	3	3	2	3	2	3	5	4	4	4	3	4	3	4	多点实践	2.75	3	3.5	3.08333	3.25
1381	1	1	3	2	4	1	1	4	1	1	4	4	4	4	4	4	4	4	4	4	4	4	4	4	4	4	4	4	4	4	4	4	4	4	4	4	4	4	4	4	4	4	4	无	4	4	4	4	4
1382	2	1	3	2	2	2	2	1	1	1	4	4	4	4	4	4	4	4	4	4	4	4	4	4	4	4	4	4	4	4	4	4	4	4	4	4	4	4	4	4	4	4	4	还可以吧	4	4	4	4	4
1383	1	2	3	2	4	2	3	5	1	1	1	7	7	7	7	7	7	7	7	7	7	7	7	7	7	7	7	7	7	7	7	7	7	7	7	7	7	7	7	7	7	7	7	无	7	7	7	7	7
1384	2	1	5	2	2	2	1	3	1	3	1	4	5	4	6	5	5	5	5	5	5	5	5	5	5	5	5	6	6	6	6	6	6	6	6	6	6	6	6	6	6	6	6	无	4.75	5	5	4.91667	5
1385	2	1	3	2	3	3	3	1	1	1	4	3	3	4	6	6	6	6	6	5	5	5	5	4	4	4	4	4	4	4	4	3	3	3	3	3	3	3	3	3	3	3	3	无	4	6	5	5	4
1386	2	2	3	2	1	4	3	3	2	1	1	4	2	5	5	3	5	3	4	4	6	2	4	5	4	6	4	5	6	5	3	3	7	4	4	7	7	7	7	7	5	5	3	无	4	3.75	4	3.91667	4.75
1387	1	2	3	2	4	1	1	4	1	2	1	4	4	5	4	4	4	4	4	4	4	4	4	4	4	4	4	4	4	4	4	4	4	4	4	4	4	4	4	4	4	4	4	无	4.25	4	4	4.08333	4
1388	2	2	3	2	4	2	2	1	1	1	1	2	4	3	4	3	3	5	3	4	3	3	5	3	3	5	4	3	4	3	4	3	5	3	4	4	4	3	4	3	4	3	4	无	3.25	3.5	3.75	3.5	3.75
1389	2	2	5	2	4	2	2	3	2	1	1	7	7	7	7	7	7	7	7	7	7	7	7	7	7	7	7	7	7	7	7	7	7	7	7	7	7	7	7	7	7	7	7	无	7	7	7	7	7
1390	2	2	3	2	2	2	1	4	2	1	2	4	4	4	4	3	4	5	4	3	4	4	3	4	4	4	4	4	3	4	3	2	3	2	5	3	2	2	3	3	4	4	4	无	4	4	3.5	3.83333	4
1391	1	2	3	2	2	3	3	1	1	1	2	4	4	4	4	4	4	4	4	4	4	4	4	4	4	4	4	4	4	4	4	4	4	4	4	4	4	4	4	4	4	4	4	无	4	4	4	4	4
1392	2	2	3	2	2	1	3	3	2	1	2	6	6	6	6	6	6	6	6	6	6	6	6	6	6	6	6	6	6	6	6	6	6	6	6	6	6	6	6	6	6	6	6	无	6	6	6	6	6
1393	1	2	3	2	4	1	1	4	2	2	4	3	3	3	5	1	1	4	3	2	2	2	4	7	7	5	2	4	4	3	3	3	3	3	2	2	2	3	6	1	1	1	1	呃，没有	3.5	2.25	2.5	2.75	5.25
1394	2	1	3	2	1	3	3	5	2	3	1	7	1	7	7	7	7	7	7	7	7	7	7	7	7	7	7	7	7	7	7	7	7	7	7	7	7	7	7	7	7	7	7	无	5.5	7	7	6.5	7
1395	2	2	3	2	2	3	2	2	2	3	4	1	1	1	1	1	1	1	1	1	1	1	1	1	1	1	1	1	1	1	1	1	1	1	1	1	1	1	1	1	1	1	1	，	1	1	1	1	1
1396	2	2	3	2	2	2	2	2	2	2	1	4	4	4	4	4	4	4	4	4	4	4	4	4	4	4	4	4	4	4	4	4	4	4	4	4	4	4	4	4	4	4	4	无	4	4	4	4	4
1397	2	4	2	2	4	2	2	3	2	1	3	4	4	4	4	4	3	4	4	4	3	4	4	4	4	4	4	4	4	4	4	4	4	4	4	4	4	4	4	4	4	4	4	无	4	3.75	3.75	3.83333	4
1398	1	2	3	2	1	1	1	4	2	3	4	4	4	3	4	5	4	4	4	3	4	5	4	4	3	5	4	4	4	5	4	4	5	4	4	4	5	4	4	4	4	5	4	无	3.75	4.25	4	4	4
1399	2	2	3	2	4	1	1	3	1	2	1	4	4	4	4	4	5	3	5	4	3	4	5	5	4	3	4	5	4	3	5	4	3	4	5	4	3	4	5	4	3	4	5	无	4	4.25	4	4.08333	4
1400	2	2	3	2	2	2	2	1	1	1	4	4	4	4	4	4	4	4	4	4	4	4	4	4	4	4	4	4	4	4	4	4	4	4	4	4	4	4	4	4	4	4	4	无	4	4	4	4	4
1401	2	2	3	2	1	2	2	3	1	1	2	5	6	5	6	5	6	6	6	5	5	5	6	5	5	6	6	5	6	5	6	6	5	6	5	6	6	6	6	5	6	5	5	无	5.5	5.75	5.25	5.5	5.5
1402	1	2	3	2	4	1	1	5	2	3	4	6	1	3	3	2	2	2	2	2	2	2	2	2	2	2	3	4	3	4	4	4	5	3	3	1	1	1	1	3	3	2	3	无	3.25	2	2	2.41667	2.25
1403	1	2	3	2	2	2	1	5	2	3	4	1	1	1	1	1	1	1	1	1	1	1	1	1	1	1	1	1	1	1	1	1	1	1	1	1	1	1	1	1	1	1	1	没有	1	1	1	1	1
1404	2	4	3	2	2	3	3	3	1	2	3	4	4	4	4	4	4	4	4	4	4	4	4	4	4	4	4	4	4	4	4	4	4	4	4	4	4	4	4	4	4	4	4	无	4	4	4	4	4
1405	1	2	3	2	4	2	1	1	1	2	2	5	3	5	6	4	5	6	6	7	6	6	5	3	5	5	7	6	7	6	4	3	7	7	7	5	5	4	5	4	4	4	5	无	4.75	5.25	6	5.33333	5
1406	1	1	3	2	4	1	1	2	2	3	4	5	4	3	5	2	1	3	4	4	4	4	2	4	4	4	4	6	4	4	4	2	4	3	5	1	1	1	5	4	4	4	4	无	4.25	2.5	3.5	3.41667	4
1407	2	2	3	2	4	1	1	1	2	2	4	4	4	4	4	4	4	4	4	4	4	4	4	4	4	4	4	4	4	4	4	4	4	4	4	4	4	4	4	4	4	4	4	无	4	4	4	4	4
1408	2	2	3	2	4	1	1	4	2	3	1	4	4	3	5	4	4	4	4	4	4	4	4	4	4	4	4	4	4	4	4	4	4	4	4	4	4	4	4	4	4	4	4	无	4	4	4	4	4
1409	2	2	2	2	2	2	3	1	1	2	4	6	4	4	3	7	7	7	5	6	7	4	5	4	4	3	6	7	7	7	4	3	6	5	3	6	6	6	7	7	7	7	7	没有	4.25	6.5	5.5	5.41667	4.25
1410	2	2	3	2	4	1	1	4	2	3	4	3	3	3	3	3	3	3	3	3	3	3	3	3	3	3	3	3	3	3	3	3	3	3	3	3	3	3	3	3	3	3	3	无	3	3	3	3	3
1411	1	2	3	2	3	3	1	4	1	1	2	7	1	6	7	7	1	7	7	7	7	7	2	7	7	7	7	6	7	7	7	6	7	7	7	6	5	4	7	5	4	6	7	无	5.25	5.5	5.75	5.5	7
1412	1	3	1	1	4	2	2	5	2	2	1	4	6	6	7	4	4	7	4	4	4	4	4	7	4	4	4	7	4	7	4	4	4	4	4	4	4	4	4	4	4	4	4	无	5.75	4.75	4	4.83333	4.75
1413	1	1	5	2	2	2	3	1	1	1	4	4	4	4	4	4	4	4	4	4	4	4	4	4	4	4	4	4	4	4	4	4	4	4	4	4	4	4	4	4	4	4	4	无	4	4	4	4	4
1414	2	2	3	2	4	1	1	2	2	3	1	7	7	7	7	7	7	7	7	7	7	7	7	7	7	7	7	7	7	7	7	7	7	7	7	7	7	7	7	7	7	7	7	无	7	7	7	7	7
1415	2	2	3	2	2	1	2	3	1	1	1	6	6	6	6	6	6	6	6	6	6	6	6	5	5	5	5	5	5	5	5	5	5	5	5	5	5	4	5	5	5	5	5	无	6	6	6	6	5
1416	2	2	3	2	2	3	3	1	1	1	2	4	4	4	4	4	4	4	4	4	4	4	4	4	4	4	4	4	4	4	4	4	4	4	4	4	4	4	4	4	4	4	4	无	4	4	4	4	4
1417	2	2	3	2	2	2	2	4	2	3	1	4	4	4	4	4	4	4	4	4	4	4	4	4	4	4	4	4	4	4	4	4	4	4	4	4	4	4	4	4	4	4	4	无	4	4	4	4	4
1418	2	2	3	2	2	3	3	3	2	2	4	5	5	5	5	5	5	5	5	5	5	5	5	5	5	5	5	5	5	5	5	5	5	5	5	5	5	5	5	5	5	5	5	。	5	5	5	5	5
1419	2	2	2	2	1	2	1	2	2	1	1	4	4	4	4	4	4	4	4	4	4	4	4	4	4	4	4	7	7	7	7	4	4	4	4	4	4	4	4	4	4	4	4	无	4	4	4	4	4
1420	2	2	5	2	2	1	1	3	2	2	1	5	5	5	5	5	5	5	5	5	5	5	5	5	5	5	5	5	5	5	5	5	5	5	5	5	5	5	5	5	5	5	5	无	5	5	5	5	5
1421	2	4	3	2	2	2	1	4	1	1	2	1	1	1	1	4	4	1	3	4	4	4	6	3	3	3	1	1	2	1	2	4	4	4	2	1	1	1	1	1	1	1	1	无	1	3	4.5	2.83333	2.5
1422	2	1	3	2	2	2	2	1	1	1	1	7	7	7	7	7	7	7	7	7	7	7	7	7	7	7	7	7	7	7	7	7	7	7	7	7	7	7	7	7	7	7	7	无	7	7	7	7	7
1423	1	2	3	2	2	1	1	3	2	1	1	7	7	7	7	7	7	7	7	7	7	7	7	7	7	7	7	7	7	7	7	7	7	7	7	7	7	7	7	7	7	7	7	无	7	7	7	7	7
1424	1	2	3	2	4	1	1	5	2	3	4	5	3	4	5	4	5	4	4	5	5	4	4	6	5	4	5	5	5	7	4	1	4	5	3	4	2	5	3	4	5	3	4	无	4.25	4.25	4.5	4.33333	5
1425	1	1	5	2	4	2	1	2	2	1	2	7	7	7	7	7	7	7	7	5	6	6	5	5	5	5	5	6	6	5	5	5	6	5	5	5	5	5	5	6	6	5	5	无	7	7	5.5	6.5	5
1426	2	2	3	2	4	2	1	2	2	2	1	5	4	5	5	5	5	5	5	5	5	5	5	5	5	5	5	5	5	5	5	5	5	5	5	5	5	5	5	5	5	5	5	无	4.75	5	5	4.91667	5
1427	2	2	3	2	4	1	1	1	1	1	1	3	4	4	4	4	4	4	4	4	4	4	4	4	4	4	4	4	4	4	4	4	4	4	4	4	4	4	4	4	4	4	4	无	3.75	4	4	3.91667	4
1428	2	1	3	2	3	2	2	4	2	3	4	4	4	4	4	4	4	4	4	4	4	4	4	4	4	4	4	4	4	4	4	4	4	4	4	4	4	4	4	4	4	4	4	无	4	4	4	4	4
1429	2	1	3	2	4	1	1	3	2	1	2	4	4	4	4	4	4	4	4	4	4	4	4	4	4	4	4	4	3	4	4	3	3	3	3	4	4	4	4	4	4	4	4	无	4	4	4	4	4
1430	2	1	3	2	4	1	1	5	2	1	4	7	7	7	7	7	7	7	7	7	7	7	7	7	7	7	7	7	7	7	7	7	7	7	7	7	7	7	7	7	7	7	7	无	7	7	7	7	7
1431	1	1	3	2	2	3	2	2	2	2	4	5	5	5	5	4	5	4	5	5	4	5	4	4	5	4	5	4	5	4	4	4	5	4	4	3	5	4	4	5	4	4	4	没有	5	4.5	4.5	4.66667	4.5
1432	1	1	3	2	4	1	1	3	2	1	4	7	7	7	7	7	7	7	7	7	7	7	7	7	7	7	7	7	7	7	7	7	7	7	7	7	7	7	7	7	7	7	7	无	7	7	7	7	7
1433	2	2	5	2	4	1	1	3	2	1	4	4	3	4	5	4	4	4	5	7	5	4	6	4	5	5	4	5	4	4	5	5	4	4	4	5	5	5	5	7	6	5	4	无	4	4.25	5.5	4.58333	4.5
1434	1	1	3	2	2	1	1	1	1	2	4	4	2	5	6	6	4	6	5	5	6	6	4	6	6	5	6	7	4	7	3	3	6	7	7	5	6	5	5	6	6	5	5	无	4.25	5.25	5.25	4.91667	5.75
1435	2	1	3	2	3	2	1	2	2	3	4	4	4	4	4	4	4	4	4	4	4	4	4	4	4	4	4	4	4	4	4	4	4	4	4	4	4	4	4	4	4	4	4	无	4	4	4	4	4
1436	2	1	3	2	4	1	1	1	2	1	4	6	4	6	6	5	5	7	7	5	6	6	7	7	7	7	7	7	6	7	5	4	4	6	6	7	7	7	7	6	6	6	6	无	5.5	6	6	5.83333	7
1437	1	1	3	2	2	2	2	3	1	3	4	4	4	4	4	4	4	4	4	4	4	4	4	4	4	4	4	4	4	4	4	4	4	4	4	4	4	4	4	4	4	4	4	无	4	4	4	4	4
1438	1	1	3	2	1	3	3	4	2	2	4	4	4	4	4	1	1	1	1	1	1	1	1	1	1	1	1	4	4	4	4	4	4	4	4	4	4	4	4	4	3	4	4	无	4	1	1	2	1
1439	2	1	5	2	2	2	1	2	1	1	4	3	3	4	5	4	4	4	4	4	4	4	4	4	4	4	4	5	3	4	3	5	4	4	4	4	5	4	4	3	5	5	4	无	3.75	4	4	3.91667	4
1440	2	2	5	2	4	1	2	3	2	1	4	5	5	5	5	4	4	4	4	3	3	3	3	4	4	4	4	4	4	4	4	3	3	3	3	4	4	4	4	4	4	4	4	无	5	4	3	4	4
1441	1	4	3	2	2	2	1	3	2	2	1	5	5	5	4	4	4	4	3	4	3	4	3	4	3	4	3	4	3	4	3	4	3	4	3	4	3	4	3	4	3	4	3	你好	4.75	3.75	3.5	4	3.5
1442	2	1	3	2	4	1	1	3	2	1	4	6	2	3	6	5	6	6	3	4	5	5	5	6	6	6	4	4	4	4	4	3	4	5	4	4	6	5	6	5	3	4	4	介绍学习方法，以及未来的多样道路	4.25	5	4.75	4.66667	5.5
1443	2	1	3	2	2	1	3	3	2	1	4	4	4	4	4	4	4	4	4	4	4	4	4	4	4	4	4	4	4	4	4	4	4	4	4	4	4	4	4	4	4	4	4	无。	4	4	4	4	4
1444	2	1	3	2	2	2	2	1	2	1	4	7	4	6	6	4	4	4	4	4	5	4	4	5	5	4	6	5	5	5	4	4	5	5	5	4	4	4	4	4	4	4	4	无	5.75	4	4.25	4.66667	5
1445	2	2	5	2	3	3	3	2	2	1	4	5	4	4	4	5	6	6	5	4	5	4	4	5	4	4	4	6	4	4	4	4	6	4	5	5	4	4	5	5	5	5	4	希望能多开一些实用技能课、增加高质量实习，让我们更好地对接职场需求。	4.25	5.5	4.25	4.66667	4.25
1446	1	1	3	2	2	2	2	1	1	2	1	7	4	4	4	4	4	4	4	4	4	4	4	4	4	4	4	4	4	4	4	4	4	4	4	4	4	4	4	4	4	4	4	没有	4.75	4	4	4.25	4
1447	2	1	3	2	4	2	1	2	2	3	1	7	6	4	7	2	2	2	2	1	1	1	1	7	7	7	7	7	4	1	4	4	7	7	7	7	7	7	7	6	4	7	3	无	6	2	1	3	7
1448	2	2	3	2	4	2	1	4	2	2	1	4	3	4	4	4	4	4	4	4	4	4	4	4	4	4	4	4	4	4	4	4	4	4	4	4	4	4	4	4	4	4	4	对我在党务方面会有较大帮助	3.75	4	4	3.91667	4
1449	1	1	1	1	1	4	4	1	1	2	1	5	5	5	5	5	5	5	5	5	5	5	5	5	5	5	5	5	5	5	5	5	5	5	5	5	5	5	5	5	5	5	5	6	5	5	5	5	5
1450	1	4	3	2	4	1	1	2	1	1	1	7	7	7	7	7	7	7	7	7	7	7	7	7	7	7	7	5	5	5	5	7	7	7	7	6	7	7	7	7	7	7	7	无	7	7	7	7	7
1451	2	2	5	2	1	4	4	5	2	2	4	3	4	2	2	3	3	4	4	4	4	4	4	3	3	4	3	4	3	4	3	4	4	4	4	4	3	3	4	3	4	3	4	无	2.75	3.5	4	3.41667	3.25
1452	2	4	3	2	2	3	2	1	2	1	1	7	7	7	7	7	7	7	7	7	7	7	7	6	6	7	6	7	6	7	6	6	6	6	6	6	6	6	6	6	6	6	6	无	7	7	7	7	6.25
1453	1	1	3	2	2	4	3	3	1	1	1	4	3	3	3	5	5	5	5	5	5	5	5	5	5	5	5	6	4	5	5	3	5	5	5	7	7	7	7	5	4	5	4	帮助我理解专业，无不足	3.25	5	5	4.41667	5
1454	1	4	3	2	4	1	1	1	1	2	4	5	4	4	5	7	7	7	7	7	7	7	7	7	7	7	7	7	7	7	7	7	7	7	7	7	7	7	7	7	7	7	7	更贴近一下当代社会的发展与就业需求导向。	4.5	7	7	6.16667	7
1455	2	2	3	2	2	1	1	4	2	2	4	1	2	2	2	2	6	5	2	2	5	2	2	2	6	2	2	2	6	6	2	2	6	2	6	2	5	4	4	4	4	4	4	无	1.75	3.75	2.75	2.75	3
1456	2	4	3	2	2	1	1	1	2	1	3	4	4	4	4	4	4	3	3	3	4	4	4	4	4	3	4	4	4	4	4	4	4	4	4	4	4	4	4	4	4	4	4	无	4	3.5	3.75	3.75	3.75
1457	2	4	3	2	2	3	1	1	1	2	1	7	7	7	7	7	7	7	7	7	7	7	7	7	7	7	7	7	7	7	7	7	7	7	7	7	7	7	7	7	7	7	7	没有	7	7	7	7	7
1458	2	1	3	2	4	1	1	3	2	1	4	3	2	2	4	4	2	4	3	3	4	3	3	4	3	3	4	7	3	6	4	2	2	3	3	6	6	6	7	4	4	4	4	无	2.75	3.25	3.25	3.08333	3.5
1459	2	4	3	2	4	1	1	2	2	2	1	4	4	4	4	4	4	3	5	4	4	4	4	4	4	5	4	4	4	4	4	5	5	5	5	4	5	4	4	6	5	5	4	无	4	4	4	4	4.25
1460	2	1	5	2	4	1	1	4	2	2	4	3	3	3	3	3	3	3	3	3	3	3	3	3	3	3	3	4	4	4	4	3	4	4	4	4	4	4	4	4	4	4	4	帮我了解我的专业	3	3	3	3	3
1461	2	1	3	2	4	1	1	2	1	1	4	7	7	7	7	5	5	7	4	5	7	5	6	6	5	5	5	6	5	6	4	4	7	5	7	7	7	7	7	5	5	6	6	无	7	5.25	5.75	6	5.25
1462	2	1	3	2	3	2	2	1	2	2	3	4	4	4	4	5	5	5	5	4	4	4	4	6	6	6	6	5	5	5	5	3	4	4	4	3	4	4	4	5	5	5	5	无	4	5	4	4.33333	6
1463	2	1	3	2	4	3	3	2	2	1	2	7	3	5	7	1	1	5	2	6	7	5	1	4	6	5	7	6	5	3	1	1	5	5	5	6	4	4	7	6	5	5	5	无	5.5	2.25	4.75	4.16667	5.5
1464	2	1	3	2	2	1	1	5	2	2	4	4	4	4	4	4	4	4	4	4	4	4	4	4	4	4	4	4	4	4	4	4	4	4	4	4	4	4	4	4	4	4	4	无	4	4	4	4	4
1465	1	1	5	2	2	2	2	3	2	1	1	6	6	6	6	6	6	6	6	6	6	6	6	6	6	6	6	6	6	6	6	6	6	6	6	6	6	6	6	6	6	6	6	资源把握不住	6	6	6	6	6
1466	1	3	1	1	4	1	1	2	2	1	4	6	1	6	6	6	6	6	6	6	6	6	6	6	5	5	6	6	7	6	1	6	2	2	2	4	4	4	4	4	4	4	4	无	4.75	6	6	5.58333	5.5
1467	2	1	5	2	4	1	3	4	2	1	1	2	3	3	3	2	2	2	2	3	3	3	3	2	2	2	2	3	3	3	3	2	2	3	3	3	3	2	2	3	3	3	3	无	2.75	2	3	2.58333	2
1468	2	1	3	2	3	1	1	3	1	1	4	4	2	2	6	2	2	4	2	3	4	3	2	5	5	4	4	4	3	5	2	2	3	2	2	1	1	1	1	2	1	2	1	说点现实的	3.5	2.5	3	3	4.5
1469	2	2	3	1	2	3	3	2	1	1	3	4	4	4	4	4	4	4	4	4	4	4	4	4	4	4	4	4	4	4	4	4	4	4	4	4	4	4	4	4	4	4	4	无	4	4	4	4	4
1470	2	4	3	2	2	1	1	1	2	2	1	7	3	3	5	4	3	3	5	5	5	3	3	3	3	4	5	5	6	4	4	3	6	3	3	3	3	4	3	4	5	5	5	无	4.5	3.75	4	4.08333	3.75
1471	2	1	3	2	1	3	3	2	2	1	4	7	6	6	5	7	6	6	6	5	5	5	5	5	6	6	5	5	6	5	6	6	5	6	5	6	5	5	5	6	6	7	7	无	6	6.25	5	5.75	5.5
1472	2	1	5	2	4	1	1	4	2	2	4	4	4	4	4	4	4	4	4	4	4	4	4	5	4	5	5	5	5	5	5	5	5	5	5	5	4	5	5	5	5	5	5	无	4	4	4	4	4.75
1473	1	1	3	2	4	1	1	2	1	2	1	3	3	3	3	3	3	3	3	3	3	3	3	3	3	3	3	3	3	3	3	3	3	3	3	3	3	3	3	3	3	3	3	是的	3	3	3	3	3
1474	1	3	5	2	4	3	3	1	2	2	2	7	7	7	7	7	7	7	7	7	7	7	7	7	7	7	7	7	7	7	7	7	7	7	7	7	7	7	7	7	7	7	7	无	7	7	7	7	7
1475	2	1	3	2	2	3	2	1	1	1	4	7	5	6	6	4	2	4	4	4	5	4	3	5	6	4	5	5	3	5	4	1	5	5	5	4	4	3	5	4	5	5	5	能不能多一点实践的环节，另外我觉得还需要开拓一下职业种类领域的视野，我希望能让我们真正得到帮助，而不是以水课来对待	6	3.5	4	4.5	5
1476	1	3	5	1	1	1	1	4	1	1	1	7	7	7	7	7	7	7	7	7	7	7	7	7	7	7	7	7	7	7	7	7	7	7	7	7	7	7	7	7	7	7	7	。	7	7	7	7	7
1477	2	2	3	2	4	3	2	2	2	3	4	5	3	6	4	3	3	5	2	4	2	2	5	5	4	5	3	6	2	2	1	2	3	4	2	3	3	3	6	6	6	6	6	希望实践经验大于理论，但要注重实践中理论的应用，二者取得平衡。当然，职业规划要以就业为目的，可以向同学们介绍与专业相关的各种职业。	4.5	3.25	3.25	3.66667	4.25
1478	2	2	3	2	3	1	1	1	2	2	4	4	4	4	4	4	4	4	4	4	4	4	4	5	5	5	5	5	5	5	5	5	5	5	5	5	5	5	5	5	5	5	5	无	4	4	4	4	5
1479	1	3	1	1	4	2	1	2	2	2	1	4	4	4	4	4	4	4	4	4	4	4	4	4	4	4	4	4	4	4	4	4	4	4	4	4	4	4	4	4	4	4	4	好	4	4	4	4	4
1480	2	2	3	2	2	2	3	3	2	2	4	5	3	5	5	5	5	5	5	5	5	5	5	5	5	5	5	6	5	6	5	6	5	6	5	6	5	6	5	6	5	6	5	无	4.5	5	5	4.83333	5
1481	2	1	3	2	2	2	2	2	1	2	1	7	7	7	7	7	7	7	7	7	7	7	7	7	7	7	7	7	7	7	7	7	7	7	7	7	7	7	7	5	4	6	4	无	7	7	7	7	7
1482	2	2	3	2	4	1	1	3	2	3	4	2	2	2	2	2	2	2	2	4	2	3	2	2	2	2	3	4	4	4	2	2	3	2	2	3	2	2	4	4	3	4	2	无	2	2	2.75	2.25	2.25
1483	1	1	3	2	4	3	1	4	2	2	4	3	3	3	3	3	3	3	3	3	3	3	3	3	3	3	3	3	3	3	3	3	3	3	3	3	3	3	3	3	3	3	3	无	3	3	3	3	3
1484	2	2	3	2	4	3	3	1	1	2	1	5	4	2	4	2	2	2	2	2	2	2	2	5	5	4	4	7	3	4	5	4	5	5	5	3	3	3	7	5	4	7	3	暂无	3.75	2	2	2.58333	4.5
1485	2	1	5	2	4	1	1	1	1	2	1	7	4	5	5	3	2	2	4	3	5	3	4	7	6	4	6	5	5	5	4	3	4	5	6	4	4	4	4	5	5	5	3	无	5.25	2.75	3.75	3.91667	5.75
1486	1	1	3	2	4	2	2	5	2	2	4	4	4	4	4	4	4	4	4	4	4	3	4	4	3	4	4	6	3	5	4	4	3	4	4	4	4	4	4	4	3	4	4	无	4	4	3.75	3.91667	3.75
1487	2	4	3	2	4	1	1	1	2	3	1	6	6	6	5	5	5	5	5	5	6	6	5	5	5	5	5	5	5	5	5	5	6	5	5	5	6	5	4	5	5	4	5	无	5.75	5	5.5	5.41667	5
1488	2	1	3	2	2	3	2	1	1	2	4	4	4	4	6	4	4	4	7	7	7	4	2	5	4	4	7	5	4	4	6	4	4	4	5	5	5	2	7	4	4	7	7	很好	4.5	4.75	5	4.75	5
1489	2	1	3	2	2	2	2	4	2	1	4	4	2	2	5	2	2	2	4	3	5	4	3	5	5	4	4	5	3	6	3	2	4	4	4	4	4	7	7	7	7	7	4	无	3.25	2.5	3.75	3.16667	4.5
1490	2	2	3	2	4	1	1	3	2	2	1	5	5	5	7	5	5	6	5	5	6	6	7	7	7	7	7	7	7	7	7	6	7	7	7	7	7	7	7	7	7	7	7	无	5.5	5.25	6	5.58333	7
1491	2	2	2	2	3	3	2	3	2	1	1	7	7	7	7	7	7	7	7	7	7	7	7	7	7	7	7	7	7	7	7	7	7	7	7	7	7	7	7	7	7	7	7	无	7	7	7	7	7
1492	1	4	3	2	2	3	1	5	2	2	2	4	4	4	4	4	4	4	4	4	4	4	4	4	4	4	4	4	4	4	4	4	4	4	4	4	4	4	4	4	4	4	4	无	4	4	4	4	4
1493	2	1	3	2	4	1	1	2	2	2	2	7	3	3	4	3	3	3	3	4	4	4	4	4	4	4	4	5	4	4	4	4	4	4	3	3	3	3	5	5	5	5	5	无	4.25	3	4	3.75	4
1494	2	1	3	2	2	3	3	2	1	1	4	4	4	5	5	5	5	5	5	5	5	5	5	5	4	4	4	5	4	5	4	5	5	5	5	5	5	5	5	5	5	5	5	无	4.5	5	5	4.83333	4.25
1495	2	1	2	2	2	1	1	3	2	3	4	4	1	1	4	4	2	2	7	3	4	5	5	3	3	4	4	5	5	5	4	4	5	4	3	5	3	4	6	3	3	6	2	无	2.5	3.75	4.25	3.5	3.5
1496	2	4	3	2	2	1	1	1	1	2	1	3	3	3	7	5	3	7	5	5	5	5	5	5	5	5	5	5	5	5	5	5	5	5	5	5	5	5	5	5	5	5	5	无	4	5	5	4.66667	5
1497	1	3	2	1	4	1	3	2	2	2	1	5	5	5	5	4	4	4	4	4	4	4	4	4	4	4	4	4	4	4	4	4	4	4	4	4	4	4	4	4	4	4	4	无	5	4	4	4.33333	4
1498	2	2	5	2	4	1	1	2	1	2	4	5	5	6	5	4	4	4	4	4	4	4	4	4	4	4	4	5	4	5	4	3	5	5	5	4	5	5	5	5	4	5	5	无	5.25	4	4	4.41667	4
1499	1	3	2	1	4	1	1	5	2	1	1	7	7	7	7	7	7	7	7	7	7	7	7	7	7	7	7	7	7	7	5	5	6	5	6	5	6	5	6	5	6	5	6	无	7	7	7	7	7
1500	2	2	3	2	4	1	1	1	1	1	1	3	3	3	3	3	3	3	3	3	3	3	3	4	5	4	3	3	4	4	3	4	3	5	4	5	4	6	6	5	4	5	3	无	3	3	3	3	4
1501	2	1	5	2	3	1	1	2	1	2	1	7	5	5	7	5	4	5	5	5	5	5	5	7	6	7	6	7	6	5	5	3	4	5	6	5	5	6	7	6	6	7	5	无	6	4.75	5	5.25	6.5
1502	2	2	3	2	3	1	2	3	1	2	3	5	5	5	5	5	5	5	5	5	5	5	5	5	5	5	5	5	5	5	5	5	5	5	5	5	5	5	5	5	5	5	5	无	5	5	5	5	5
1503	2	2	3	2	4	2	2	3	2	1	1	6	6	6	6	5	5	5	5	6	6	6	6	6	6	5	5	5	5	5	5	5	5	5	5	5	5	5	5	5	5	5	5	无	6	5	6	5.66667	5.5
1504	2	2	3	2	4	1	1	3	2	1	1	5	4	4	3	2	2	3	3	3	3	3	3	3	3	3	3	3	3	3	3	3	3	3	3	3	3	3	3	3	3	3	3	无	4	2.5	3	3.16667	3
1505	2	2	3	2	3	2	1	2	1	2	4	5	6	6	5	6	5	6	4	6	5	6	5	5	5	4	5	6	5	6	5	5	5	6	5	5	4	5	6	5	5	5	5	无	5.5	5.25	5.5	5.41667	4.75
1506	2	2	3	2	2	3	2	3	2	1	1	6	6	6	6	6	6	6	6	6	6	6	6	6	6	6	6	6	6	6	6	6	6	6	6	6	6	6	6	6	6	6	6	无	6	6	6	6	6
1507	2	4	3	2	2	3	3	1	2	1	3	5	5	5	5	5	5	5	5	5	5	5	5	5	5	5	5	5	5	5	5	5	5	5	5	5	5	5	5	5	5	5	5	无	5	5	5	5	5
1508	1	2	3	2	4	1	1	5	1	1	3	7	7	7	7	7	7	7	7	7	7	7	7	7	7	7	7	7	7	7	7	7	7	7	7	7	7	7	7	7	7	7	7	无	7	7	7	7	7
1509	2	2	5	2	3	1	1	2	1	2	1	4	4	4	4	4	4	4	4	4	4	4	4	4	4	4	4	3	3	3	3	3	3	3	3	3	3	3	3	3	3	3	3	目前没有什么好建议	4	4	4	4	4
1510	2	2	3	2	3	1	1	1	2	2	2	4	4	4	4	4	4	4	4	4	4	4	4	4	4	4	4	4	4	4	4	4	4	4	4	4	4	4	4	4	4	4	4	无	4	4	4	4	4
1511	1	3	2	1	4	1	3	2	2	2	1	4	4	4	4	4	4	4	4	4	4	4	4	4	4	4	4	4	4	4	4	4	4	4	4	4	4	4	4	4	4	4	4	无	4	4	4	4	4
1512	2	2	3	2	2	2	2	2	2	2	4	5	5	5	5	5	5	5	5	5	5	5	5	5	5	5	5	5	5	5	5	5	5	5	5	5	5	5	5	5	5	5	5	无	5	5	5	5	5
1513	2	2	5	2	4	1	1	5	2	2	1	7	7	7	7	7	7	7	7	7	7	7	7	7	7	7	7	7	7	7	7	7	7	7	7	7	5	6	5	5	5	5	5	无	7	7	7	7	7
1514	2	2	3	2	4	1	1	2	2	2	1	5	5	4	4	6	6	6	6	6	6	6	6	6	6	6	6	6	6	6	6	6	6	6	6	6	6	6	6	6	6	6	6	无	4.5	6	6	5.5	6
1515	2	2	5	2	2	2	2	2	2	2	1	4	4	4	4	4	4	4	4	4	4	4	4	4	4	4	4	4	4	4	4	4	4	4	4	4	4	4	4	4	4	4	4	无	4	4	4	4	4
1516	2	2	3	2	4	3	2	1	1	1	3	4	4	3	2	2	2	3	2	2	2	2	2	3	3	3	3	6	6	6	6	5	4	5	5	5	5	5	5	5	5	5	5	无	3.25	2.25	2	2.5	3
1517	2	1	3	2	2	2	2	1	1	1	4	6	6	6	6	4	4	2	4	7	6	4	4	4	5	5	5	7	6	6	4	2	6	6	6	3	2	2	6	6	6	6	6	无	6	3.5	5.25	4.91667	4.75
1518	2	2	3	2	3	2	2	3	1	1	1	6	6	6	6	6	6	6	6	6	6	6	6	6	6	6	6	6	6	6	6	6	6	6	6	6	6	6	6	6	6	6	6	无	6	6	6	6	6
1519	2	2	5	2	4	1	1	3	2	1	1	4	4	4	4	4	4	4	4	4	4	4	4	4	4	4	4	4	4	4	4	4	4	4	4	4	4	4	4	4	4	4	4	无	4	4	4	4	4
1520	2	4	3	2	4	1	1	3	1	3	2	5	5	5	5	4	5	5	4	4	5	5	4	5	4	5	4	5	5	5	4	5	4	5	5	5	5	5	5	5	6	5	6	无	5	4.5	4.5	4.66667	4.5
1521	2	2	3	2	2	3	3	1	1	1	4	3	2	3	6	4	4	4	3	5	5	3	5	5	2	3	4	7	7	7	4	2	7	2	2	7	4	4	5	5	5	6	4	无	3.5	3.75	4.5	3.91667	3.5
1522	2	3	5	1	4	1	1	1	2	1	1	7	5	7	7	6	6	7	6	6	7	6	5	5	5	5	6	7	6	6	5	2	7	7	5	5	3	3	6	7	6	7	3	开设实习体验	6.5	6.25	6	6.25	5.25
1523	1	3	2	1	3	3	3	4	2	3	4	4	4	4	4	5	5	5	5	5	5	5	5	4	5	4	4	5	5	4	5	5	5	5	5	5	5	5	5	5	5	5	5	无	4	5	5	4.66667	4.25
1525	2	3	2	1	2	3	2	4	2	3	1	5	4	5	5	5	4	5	5	5	5	4	4	5	4	4	3	4	3	4	4	4	3	4	4	3	3	3	3	3	3	3	3	无	4.75	4.75	4.5	4.66667	4
1526	1	3	2	1	4	1	1	5	2	3	4	3	1	3	5	3	3	3	3	3	3	3	3	3	3	3	3	3	3	3	3	3	3	3	3	3	3	3	3	3	3	3	3	无	3	3	3	3	3
1527	2	1	3	2	3	1	1	2	1	1	1	5	4	5	7	3	3	6	6	2	5	2	2	5	6	3	4	5	3	3	4	4	5	5	6	2	2	2	4	6	5	5	5	无	5.25	4.5	2.75	4.16667	4.5
1528	2	3	5	2	4	2	1	3	1	1	1	6	6	6	6	6	6	6	6	6	6	6	6	6	6	6	6	6	6	6	6	6	6	6	6	6	6	6	6	6	6	6	6	无	6	6	6	6	6
1529	1	2	3	2	2	2	1	2	1	1	1	7	7	7	7	7	7	7	7	7	7	7	7	7	7	7	7	7	7	7	7	7	7	7	7	7	7	7	7	7	7	7	7	无	7	7	7	7	7
1530	2	1	3	2	2	1	2	2	2	2	3	7	7	7	7	7	7	7	7	7	7	7	7	7	7	7	7	7	7	7	7	7	7	7	7	7	7	7	7	7	7	7	7	无	7	7	7	7	7
1531	2	4	3	2	3	1	1	4	2	3	2	5	5	4	4	3	3	3	3	3	3	3	3	3	3	3	3	3	3	3	3	3	3	3	3	3	3	3	3	3	3	3	3	无	4.5	3	3	3.5	3
1532	2	3	2	1	4	1	1	5	2	3	4	7	3	6	6	6	6	6	6	6	6	6	6	6	6	6	6	6	6	6	6	6	6	6	6	6	6	6	6	6	6	6	6	无	5.5	6	6	5.83333	6
1533	2	2	5	2	4	1	1	2	2	1	1	7	7	4	4	4	3	3	3	4	4	4	4	4	4	4	4	4	4	4	4	4	4	4	4	4	4	4	4	4	4	4	4	多些实践	5.5	3.25	4	4.25	4
1534	2	2	3	2	2	3	2	2	2	1	4	6	4	6	6	6	6	6	6	6	6	6	6	5	5	5	5	5	5	5	4	5	5	3	3	5	5	5	5	4	4	5	5	无	5.5	6	6	5.83333	5
1535	2	3	2	1	1	2	2	3	2	3	1	3	1	1	1	1	1	1	1	1	1	1	1	4	5	4	4	4	4	4	4	4	4	4	4	4	4	4	4	4	4	4	4	u	1.5	1	1	1.16667	4.25
1536	2	1	3	2	4	1	1	2	1	2	1	3	1	4	7	4	2	3	4	4	5	3	6	7	6	6	5	4	3	6	5	4	3	5	4	5	7	5	7	5	4	4	4	希望教师增强的课堂教学逻辑，并与教材相结合。多一些实践实习机会。	3.75	3.25	4.5	3.83333	6
1537	2	2	3	2	4	1	1	4	2	3	1	7	5	3	3	2	2	2	2	4	2	2	2	2	3	2	2	5	2	4	2	2	2	2	2	4	3	3	4	2	2	4	2	无	4.5	2	2.5	3	2.25
1538	1	2	3	2	4	1	1	4	2	2	1	3	3	4	3	3	3	3	3	3	3	3	3	3	3	3	3	3	3	3	3	3	3	3	3	3	3	3	3	3	3	3	3	无	3.25	3	3	3.08333	3
1539	2	2	3	2	2	2	3	1	1	2	3	4	5	5	6	6	6	6	5	4	4	4	6	5	4	5	5	6	4	5	6	3	4	5	5	6	6	6	6	6	4	5	5	社会实践方面机会比较少，希望学校可以多帮助学生链接校外资源，提供外出实践的机会	5	5.75	4.5	5.08333	4.75
1540	2	4	3	1	2	1	3	1	2	2	3	4	5	5	5	5	5	5	5	5	5	5	5	5	5	5	5	5	5	5	5	5	5	5	5	5	5	5	5	5	5	5	5	五	4.75	5	5	4.91667	5
1541	2	4	3	2	4	1	1	1	2	2	2	6	5	5	6	6	5	4	4	5	5	4	5	4	6	4	4	6	5	5	4	3	5	4	3	5	4	4	6	5	5	6	4	无	5.5	4.75	4.75	5	4.5
1542	2	3	2	1	4	2	1	5	1	2	4	7	7	7	7	7	7	7	7	7	7	7	7	7	7	7	7	7	7	7	7	7	7	7	7	7	7	7	7	7	7	7	7	🈚️	7	7	7	7	7
1543	1	1	3	2	2	2	1	2	2	1	2	4	4	4	5	3	3	3	3	3	3	3	4	4	3	3	4	5	4	4	4	4	4	4	4	5	4	5	6	4	3	5	4	无	4.25	3	3.25	3.5	3.5
1544	2	4	3	2	1	3	3	3	2	3	2	1	1	1	1	7	7	7	7	7	7	7	7	7	7	7	7	7	7	7	7	7	7	7	7	7	7	7	7	7	7	7	7	无	1	7	7	5	7
1545	1	3	1	2	2	2	1	2	2	1	1	6	6	6	6	6	6	6	6	6	6	6	6	6	6	6	6	6	6	6	6	6	6	6	6	6	6	6	6	6	6	6	6	1	6	6	6	6	6
1546	1	4	3	2	4	1	1	3	1	2	3	4	4	4	4	4	4	4	4	4	4	4	4	4	4	4	4	4	4	4	4	4	4	4	4	3	3	3	3	3	3	3	3	无	4	4	4	4	4
1547	2	2	2	1	1	2	1	5	2	3	1	7	7	7	7	7	7	7	7	7	7	7	7	7	7	7	7	7	7	7	7	7	7	7	7	7	7	7	7	7	7	7	7	无	7	7	7	7	7
1548	2	1	3	2	2	2	3	1	1	2	4	7	3	7	7	7	7	7	7	7	7	7	7	5	5	5	5	7	3	4	4	5	7	5	5	7	7	7	7	7	5	5	7	越来越好	6	7	7	6.66667	5
1549	2	1	3	2	4	2	2	3	1	1	2	7	7	7	7	7	7	7	7	7	7	7	7	6	6	7	6	6	6	6	6	6	6	6	6	6	6	6	6	6	6	6	6	无	7	7	7	7	6.25
1550	1	4	2	1	4	3	2	3	2	2	1	4	4	4	4	4	4	4	4	4	4	4	4	4	4	4	4	4	4	4	4	4	4	4	4	4	4	4	4	4	4	4	4	有	4	4	4	4	4
1551	2	4	3	2	4	1	1	3	1	2	2	4	3	6	6	4	3	5	5	4	4	3	5	5	4	4	5	6	5	6	7	4	4	5	4	6	6	6	6	6	6	7	6	无	4.75	4.25	4	4.33333	4.5
1552	2	1	2	1	4	1	1	3	2	1	1	7	7	7	7	7	7	7	7	6	7	6	6	7	6	7	6	6	7	6	7	6	7	6	7	6	7	6	7	7	6	7	6	无	7	7	6.25	6.75	6.5
1553	2	1	3	2	4	1	1	3	2	1	1	7	7	7	7	7	7	7	7	7	7	7	7	7	7	7	7	7	7	7	7	7	7	7	7	7	7	7	7	7	7	7	7	无	7	7	7	7	7
1554	1	4	3	2	4	1	1	2	1	1	1	4	4	4	4	5	4	4	4	5	4	4	4	5	4	5	5	5	4	5	5	5	5	4	5	5	4	5	4	5	4	5	4	加大专业与社会需求（实务操作）匹配度	4	4.25	4.25	4.16667	4.75
1555	2	3	2	1	4	2	1	2	2	3	3	6	6	5	6	6	5	5	6	6	6	6	6	6	6	6	6	6	6	6	6	6	6	6	6	6	6	6	6	5	5	6	5	无	5.75	5.5	6	5.75	6
1556	2	2	2	1	4	1	1	2	1	2	1	3	3	3	3	4	4	4	4	3	3	3	4	4	3	3	3	3	3	3	3	6	5	5	5	6	6	6	5	6	6	6	6	无	3	4	3.25	3.41667	3.25
1557	2	4	3	2	2	2	1	3	2	1	2	6	4	4	5	5	5	5	5	6	6	4	6	5	4	4	4	5	5	5	3	3	4	2	4	1	1	1	3	4	5	4	5	无	4.75	5	5.5	5.08333	4.25
1558	2	4	3	2	2	3	3	1	1	1	3	7	7	7	7	7	7	7	7	7	7	7	7	7	7	7	7	7	7	7	7	7	7	7	7	7	7	7	7	7	7	7	7	无	7	7	7	7	7
1559	2	2	2	1	4	1	1	3	2	2	1	5	5	5	5	5	5	5	5	5	5	5	5	5	5	5	5	5	5	5	5	5	5	5	5	5	5	5	5	5	5	5	5	无	5	5	5	5	5
1560	2	2	2	1	2	3	1	4	2	2	1	3	3	5	5	5	5	5	5	3	3	3	3	3	3	3	3	4	3	3	3	4	3	3	3	3	3	3	3	3	3	3	3	无	4	5	3	4	3
1561	2	2	5	1	4	1	1	2	2	1	1	7	7	7	7	7	7	7	7	7	7	7	7	5	5	5	5	5	5	5	5	5	5	5	5	6	6	6	6	6	6	6	6	无	7	7	7	7	5
1562	2	2	3	2	1	1	2	5	2	3	1	2	2	2	2	2	2	2	2	2	2	2	2	3	3	3	3	3	3	3	3	3	3	3	4	3	3	3	3	3	3	3	3	无	2	2	2	2	3
1563	2	2	2	1	3	2	2	2	2	3	3	4	4	4	5	4	4	4	4	4	4	4	4	4	4	4	4	4	4	4	4	4	4	4	4	4	4	4	4	4	4	4	4	暂无	4.25	4	4	4.08333	4
1564	2	2	3	2	3	3	2	4	2	1	3	6	5	5	5	5	5	5	5	5	5	5	5	4	4	4	5	5	4	4	4	4	5	4	4	4	4	4	4	5	5	5	4	无	5.25	5	5	5.08333	4.25
1565	2	4	3	2	4	3	3	4	2	3	2	1	1	1	1	1	1	1	1	1	1	1	1	1	1	1	1	1	1	1	1	1	1	1	1	1	1	1	1	1	1	1	1	gg	1	1	1	1	1
1566	2	3	5	1	3	1	1	5	2	2	1	6	7	7	7	7	7	7	7	5	5	5	5	6	6	6	6	6	6	6	6	6	6	6	6	6	6	6	6	6	6	6	6	无	6.75	7	5	6.25	6
1567	2	4	5	2	1	3	3	3	2	1	1	5	5	5	5	5	5	5	5	5	5	5	5	5	5	5	5	5	6	6	6	6	6	6	6	6	6	6	6	6	6	6	6	无	5	5	5	5	5
1568	2	4	3	2	4	1	1	2	2	1	1	6	7	6	6	4	7	4	6	6	5	5	6	5	6	5	6	5	6	5	6	5	6	5	6	5	6	4	6	5	6	5	5	没有	6.25	5.25	5.5	5.66667	5.5
1569	1	1	2	1	4	1	1	1	1	1	1	7	3	5	7	4	7	5	5	5	5	5	5	5	5	5	5	7	5	5	5	7	7	7	7	6	6	6	6	6	6	6	6	无	5.5	5.25	5	5.25	5
1570	2	4	3	2	2	1	1	1	1	3	1	6	6	6	6	6	6	6	6	6	6	7	7	7	7	7	7	7	5	7	7	7	7	7	7	7	7	7	7	7	7	7	7	无	6	6	6.5	6.16667	7
1571	2	4	2	2	4	1	1	3	2	3	1	7	7	7	7	7	7	7	7	7	7	7	7	7	7	7	7	7	7	7	7	7	7	7	7	7	7	7	7	7	7	7	7	无	7	7	7	7	7
1572	2	4	2	2	4	1	1	4	2	3	3	4	4	4	5	4	4	5	5	4	4	5	3	5	3	5	5	5	5	2	3	3	4	3	7	4	4	4	6	4	3	4	4	无	4.25	4.5	4	4.25	4.5
1573	1	3	2	1	2	3	3	3	2	3	2	6	5	5	5	5	5	5	5	5	5	5	5	4	5	5	5	6	5	5	5	5	5	5	5	5	5	5	5	5	5	5	5	无	5.25	5	5	5.08333	4.75
1574	1	4	2	2	4	1	1	4	2	1	4	6	5	5	5	4	5	5	5	5	5	5	5	5	6	5	5	6	5	5	5	5	5	5	6	5	5	4	4	4	5	4	5	无	5.25	4.75	5	5	5.25
1575	2	2	3	2	2	4	3	3	1	2	4	5	3	3	5	4	4	3	4	3	3	4	4	4	3	3	3	4	2	4	2	3	3	4	2	3	2	2	3	4	3	3	3	实践课程当增加	4	3.75	3.5	3.75	3.25
1576	2	2	3	2	4	1	1	2	1	2	1	3	3	3	4	4	4	4	4	4	4	4	4	4	4	4	4	4	4	4	4	4	4	4	4	4	4	4	4	4	4	4	4	无	3.25	4	4	3.75	4
1577	1	1	3	2	2	3	2	4	1	2	1	6	6	6	6	6	6	6	6	6	6	6	6	6	6	6	6	6	6	6	6	6	6	6	6	6	6	6	6	6	6	6	6	无	6	6	6	6	6
1578	1	1	1	2	2	4	2	4	2	1	1	6	6	6	6	6	6	6	6	6	6	6	6	6	6	6	6	6	6	6	5	6	6	6	6	6	6	6	6	6	6	6	6	无	6	6	6	6	6
1579	2	1	5	2	3	1	1	2	1	1	4	7	2	4	5	4	4	4	4	4	4	4	4	5	3	3	3	7	5	5	4	2	2	4	4	6	6	6	6	6	6	6	6	无	4.5	4	4	4.16667	3.5
1580	2	4	5	2	4	1	1	1	1	2	1	7	7	7	7	7	7	7	7	7	7	7	7	7	7	7	7	7	7	7	7	7	7	7	7	6	6	6	6	6	5	4	6	无	7	7	7	7	7
1581	1	1	5	2	1	1	1	5	2	3	4	4	4	4	4	4	4	4	4	4	4	4	4	4	4	4	4	4	4	4	4	4	4	4	4	4	4	4	4	4	4	4	4	无	4	4	4	4	4
1582	2	2	3	2	4	1	1	1	2	2	1	1	2	2	5	6	6	6	4	4	5	4	6	6	6	6	6	6	4	5	6	1	4	2	3	7	7	7	7	7	7	7	7	希望多开展一些针对性强的就业指导	2.5	5.5	4.75	4.25	6
1583	2	1	3	2	4	2	3	1	1	1	1	5	5	5	5	3	4	4	4	5	5	3	4	6	6	5	4	7	6	3	5	5	6	6	6	5	5	5	4	7	6	6	6	中国共产党简史的老师课堂展示也太水了吧？？同学照着念就行就说很好，，那上去分享的意义是什么呢？？	5	3.75	4.25	4.33333	5.25
1584	2	4	3	2	4	1	1	1	1	2	3	6	6	5	6	7	6	6	6	6	6	6	6	6	6	6	6	6	6	5	7	6	6	6	6	6	6	6	6	6	6	6	6	无	5.75	6.25	6	6	6
1585	2	1	3	2	2	1	1	2	2	2	1	4	1	2	4	4	4	4	4	1	2	2	2	1	1	1	1	4	1	1	1	1	4	4	4	4	4	7	7	1	1	4	1	无	2.75	4	1.75	2.83333	1
1586	1	1	3	2	2	2	1	1	1	1	4	4	4	4	4	4	4	4	4	4	4	4	4	4	4	4	4	4	4	4	4	4	4	4	4	4	4	4	4	4	4	4	4	多设置题目	4	4	4	4	4
1587	2	1	3	2	4	2	2	3	1	1	1	5	4	5	6	4	6	4	5	4	5	6	7	4	6	4	6	6	5	6	5	7	7	7	7	7	7	7	7	6	7	7	7	我认为应该添加一些实践类的课程	5	4.75	5.5	5.08333	5
1588	2	2	3	2	3	1	1	1	1	1	1	4	4	4	4	4	4	4	4	4	4	4	4	4	4	4	4	4	4	4	4	4	4	4	4	4	4	4	4	4	4	4	4	无	4	4	4	4	4
1589	2	4	3	2	2	2	2	3	1	1	1	6	6	6	6	4	4	4	4	5	5	5	5	5	5	5	5	5	4	4	4	4	5	4	5	4	4	6	5	5	5	5	5	无	6	4	5	5	5
1590	1	1	3	2	2	3	3	3	2	1	1	4	3	4	5	4	5	6	5	4	5	5	6	5	6	4	5	5	4	5	5	4	5	4	5	5	4	4	6	4	4	3	3	无	4	5	5	4.66667	5
1591	1	1	3	2	3	1	1	1	1	2	1	7	7	7	7	7	7	7	7	7	7	7	7	7	7	7	7	7	7	7	7	7	7	7	7	7	7	7	7	7	7	7	7	无	7	7	7	7	7
1592	1	1	1	1	2	3	1	1	1	1	2	3	4	3	4	3	4	3	4	3	4	3	4	3	4	3	4	3	4	3	4	3	4	3	4	3	4	3	4	3	4	3	4	阿巴阿巴，	3.5	3.5	3.5	3.5	3.5
1593	1	3	3	2	4	1	1	3	2	1	1	6	6	6	6	6	6	6	6	6	6	6	6	6	6	6	6	6	6	6	6	5	5	5	5	5	5	5	5	5	5	5	5	无，如果能再多一些专业课类型实践就更好了	6	6	6	6	6
1594	2	1	3	2	4	1	1	1	1	1	2	7	4	3	6	6	6	6	5	4	4	4	5	4	1	2	5	5	3	3	2	1	6	6	6	3	5	1	5	3	4	3	3	无	5	5.75	4.25	5	3
1595	1	1	3	2	4	1	1	5	2	3	4	4	4	4	4	4	4	4	4	4	4	4	4	4	4	4	4	4	4	4	4	4	4	4	4	4	4	4	4	4	4	4	4	无	4	4	4	4	4
1596	2	2	3	2	4	1	1	3	2	2	1	3	3	3	5	4	5	6	6	4	3	2	3	2	3	3	3	6	3	4	2	2	4	2	4	2	2	2	6	4	4	4	3	无	3.5	5.25	3	3.91667	2.75
1597	1	1	3	2	4	1	1	5	2	2	1	3	3	3	3	3	4	5	2	3	3	5	2	3	3	3	3	4	4	4	4	4	4	4	4	4	4	3	5	4	4	4	4	无	3	3.5	3.25	3.25	3
1598	2	1	3	2	3	2	2	4	2	2	4	7	4	5	6	4	3	4	3	3	4	3	3	3	3	3	4	4	2	4	3	4	4	4	5	3	2	4	4	4	4	4	4	无	5.5	3.5	3.25	4.08333	3.25
1599	1	1	3	2	2	3	3	3	1	1	2	6	6	6	6	6	6	6	6	6	6	6	6	6	6	6	6	6	6	6	6	6	6	6	6	6	6	6	6	6	6	6	6	无	6	6	6	6	6
1600	1	1	5	2	4	2	1	2	2	1	1	7	7	4	4	4	4	4	4	4	4	4	4	4	4	4	4	4	4	4	4	4	4	4	4	4	4	4	4	4	4	4	4	无	5.5	4	4	4.5	4
1601	2	1	3	2	4	2	2	3	1	1	1	5	5	5	5	4	4	4	4	4	4	4	4	4	3	3	3	6	6	6	7	6	6	6	6	6	6	6	6	6	6	6	6	对于我来说作用很大	5	4	4	4.33333	3.25
1602	1	1	3	2	2	3	1	5	2	2	1	4	4	4	4	4	4	4	4	4	4	4	4	4	4	4	4	4	4	4	4	4	4	4	4	4	4	4	4	4	4	4	4	无	4	4	4	4	4
1603	1	1	3	2	2	1	1	3	2	3	4	7	1	7	4	7	4	4	4	4	4	4	4	4	4	4	4	4	4	4	4	4	4	4	4	7	7	7	7	7	7	7	7	无	4.75	4.75	4	4.5	4
1604	2	4	3	2	2	3	3	3	1	1	3	5	5	5	5	5	5	5	5	5	5	5	5	6	6	6	6	6	6	6	6	6	6	6	6	5	5	5	5	5	6	6	6	无	5	5	5	5	6
1605	1	1	3	2	2	3	2	2	1	1	4	4	4	4	4	4	4	4	4	4	4	4	4	4	4	4	4	4	4	4	4	4	4	4	4	4	4	4	4	4	4	4	4	没有	4	4	4	4	4
1606	1	3	1	1	3	1	2	3	2	3	1	6	6	6	6	6	6	6	6	6	6	6	6	6	6	6	6	6	6	6	6	6	6	6	6	6	6	6	6	6	6	6	6	无	6	6	6	6	6
1607	1	1	3	2	2	2	1	3	1	2	4	3	3	3	3	5	5	5	5	4	4	4	4	4	3	4	3	5	3	3	3	3	3	3	3	5	5	5	7	6	4	4	4	无	3	5	4	4	3.5
1608	2	4	3	2	2	3	1	3	1	2	2	6	6	5	3	5	4	6	6	6	6	6	6	5	6	3	4	5	5	5	5	3	6	3	5	4	3	4	4	3	3	4	2	无	5	5.25	6	5.41667	4.5
1609	1	1	1	2	2	2	2	1	2	2	2	7	6	7	7	7	7	7	6	7	7	7	7	6	6	7	7	7	7	7	7	7	7	7	7	7	7	7	7	7	7	7	7	无	6.75	6.75	7	6.83333	6.5
1610	2	3	1	1	2	1	1	1	2	1	1	4	4	4	4	4	4	4	4	4	4	4	4	4	4	4	4	4	4	4	4	4	4	4	4	4	4	4	4	4	4	4	4	无	4	4	4	4	4
1611	2	2	3	2	1	2	3	1	1	2	1	7	5	5	7	7	6	7	6	6	7	7	7	7	7	7	7	7	7	7	7	7	7	7	7	5	5	5	7	7	7	7	7	无	6	6.5	6.75	6.41667	7
1612	2	4	2	2	4	1	1	3	1	1	3	3	4	5	5	2	3	2	4	4	3	5	5	3	3	3	4	5	5	4	4	3	7	3	4	5	4	5	5	5	4	4	4	无	4.25	2.75	4.25	3.75	3.25
1613	1	2	2	1	2	2	2	4	2	3	1	4	3	3	2	4	3	4	3	3	4	3	3	3	4	4	3	4	3	4	4	3	4	4	3	3	4	4	3	4	4	3	4	没有	3	3.5	3.25	3.25	3.5
1614	2	1	3	1	1	1	1	1	1	1	1	5	5	6	6	7	6	7	6	7	7	7	7	7	7	7	7	7	7	7	7	7	7	7	7	7	7	7	7	7	7	7	7	无	5.5	6.5	7	6.33333	7
1615	2	3	2	1	2	1	1	1	1	3	1	2	2	2	2	2	2	2	2	2	2	2	2	2	2	2	2	2	2	2	2	2	2	2	2	2	2	2	2	2	2	2	2	无	2	2	2	2	2
1616	1	2	5	1	2	2	2	5	2	2	2	5	3	5	4	5	1	4	5	1	5	5	1	6	5	5	1	5	5	5	5	5	7	2	6	5	6	5	2	5	5	5	6	没有不足	4.25	3.75	3	3.66667	4.25
1617	2	1	3	2	4	2	2	3	2	3	1	4	4	4	4	4	4	4	4	4	4	4	4	4	4	4	4	4	4	4	4	4	4	4	4	4	4	4	4	4	4	4	4	无	4	4	4	4	4
1618	1	3	1	1	1	3	3	2	1	1	1	7	7	7	7	7	7	7	7	7	7	7	7	7	7	7	7	7	7	7	7	7	7	7	7	7	7	7	7	7	7	7	7	无	7	7	7	7	7
1619	2	1	3	2	4	1	1	3	2	1	2	7	7	7	7	7	7	7	7	7	7	7	7	7	7	7	7	7	7	7	7	7	7	7	7	7	7	7	7	7	7	7	7	无	7	7	7	7	7
1620	1	4	3	2	4	1	1	1	2	2	2	7	7	7	7	7	7	7	7	7	7	7	7	7	7	7	7	7	7	7	7	7	7	7	7	7	7	7	7	7	7	7	7	无	7	7	7	7	7
1621	2	1	3	2	2	3	3	3	2	1	4	4	4	4	4	4	4	4	4	4	4	4	4	4	4	4	4	4	4	4	4	4	4	4	4	4	4	4	4	4	4	4	4	不	4	4	4	4	4
1622	1	2	3	2	3	1	1	4	2	2	1	4	4	4	4	4	4	4	4	4	4	4	4	4	4	4	4	4	4	4	4	4	4	4	4	4	4	4	4	4	4	4	4	无	4	4	4	4	4
1623	2	1	3	2	2	1	1	1	1	1	1	6	6	6	6	6	6	6	6	6	6	6	6	6	6	6	6	6	6	6	6	6	6	6	6	6	6	6	6	6	6	6	6	无	6	6	6	6	6
1624	1	1	2	1	4	1	1	5	2	1	1	4	4	4	4	4	4	4	4	4	4	4	4	4	4	4	4	4	4	4	4	4	4	4	4	4	4	4	4	4	4	4	4	无	4	4	4	4	4
1625	2	2	3	2	4	1	1	2	1	1	1	7	7	7	7	7	7	5	4	4	5	6	4	5	5	4	5	6	5	6	4	4	6	4	5	5	6	6	4	6	5	5	6	提升就业技能吧	7	5.75	4.75	5.83333	4.75
1626	1	2	2	1	4	1	1	5	2	1	3	6	4	7	5	5	5	5	5	5	6	5	6	5	6	6	6	5	6	5	6	5	5	5	6	5	5	6	6	5	5	5	5	无	5.5	5	5.5	5.33333	5.75
1627	2	1	2	2	2	2	2	3	2	2	1	7	5	6	7	7	7	7	6	4	4	5	5	5	4	5	4	4	3	3	3	3	4	5	5	5	3	3	3	3	3	4	3	增加实践课程	6.25	6.75	4.5	5.83333	4.5
1628	2	1	3	2	2	1	1	1	2	1	3	7	7	7	7	7	7	7	7	7	7	7	7	7	7	7	7	7	7	7	7	7	7	7	7	7	7	7	7	7	7	7	7	无	7	7	7	7	7
1629	2	1	2	2	1	4	2	1	1	1	1	5	1	4	4	6	6	6	5	4	5	6	6	4	3	4	3	5	4	3	3	3	5	4	4	6	6	6	6	4	3	4	5	无	3.5	5.75	5.25	4.83333	3.5
1630	1	1	3	2	2	2	2	2	2	2	2	1	1	1	1	1	1	1	1	1	1	1	1	1	1	1	1	4	4	4	4	4	7	7	4	3	4	3	5	3	5	5	5	乌	1	1	1	1	1
1632	1	1	3	2	2	2	2	5	2	2	4	4	4	4	4	4	4	4	4	4	4	4	4	4	4	4	4	4	4	4	4	4	4	4	4	4	4	4	4	4	4	4	4	五	4	4	4	4	4
1633	2	4	3	2	4	1	1	3	2	1	3	5	5	5	5	5	4	6	5	5	5	5	5	5	5	5	5	5	5	5	5	5	5	4	5	7	7	6	7	5	5	6	5	提供实质性的实习岗位而不是走过场	5	5	5	5	5
1634	1	2	5	1	4	4	2	3	2	2	1	4	4	4	4	3	3	3	3	2	3	3	3	2	2	2	2	2	2	2	2	2	2	2	2	2	2	2	2	2	2	3	3	没有	4	3	2.75	3.25	2
1635	1	2	2	1	2	1	1	1	1	1	1	4	4	4	4	4	4	4	4	4	4	4	4	4	4	4	4	4	4	4	4	4	4	4	4	4	4	4	4	4	4	4	4	无	4	4	4	4	4
1636	1	1	1	1	2	1	1	5	2	1	4	6	4	3	7	4	5	3	6	4	4	4	3	3	5	5	5	5	4	5	3	4	3	2	4	4	4	4	4	4	4	4	4	无	5	4.5	3.75	4.41667	4.5
1637	2	1	3	2	4	1	2	1	2	2	1	6	6	5	5	3	5	3	4	5	4	7	6	6	6	6	7	6	5	5	6	5	6	5	6	6	6	6	5	6	7	6	5	无	5.5	3.75	5.5	4.91667	6.25
1638	2	4	3	2	1	2	2	2	2	1	4	4	4	4	4	4	4	4	4	4	4	4	4	4	4	4	4	4	4	4	4	4	4	4	4	4	4	4	4	4	4	4	4	无	4	4	4	4	4
1640	2	1	2	1	2	2	3	1	1	1	1	6	5	6	6	6	6	6	4	4	4	6	7	6	6	6	6	6	6	6	6	4	6	6	6	5	5	5	6	5	5	6	5	无	5.75	5.5	5.25	5.5	6
1641	2	1	3	2	4	1	1	3	2	2	2	4	4	4	4	5	5	5	5	5	5	5	5	5	5	5	5	5	5	5	5	5	5	5	5	6	6	6	6	5	5	5	5	无	4	5	5	4.66667	5
1642	2	2	2	1	2	2	1	1	1	1	1	2	2	2	2	2	2	2	2	2	2	2	2	2	2	2	2	2	2	2	2	2	2	2	2	2	2	2	2	2	2	2	2	无	2	2	2	2	2
1643	2	4	2	2	3	2	2	4	2	2	3	7	7	7	7	7	7	7	7	7	7	7	7	7	7	7	7	7	7	7	7	7	7	7	7	7	7	7	7	7	7	7	7	无	7	7	7	7	7
1644	1	1	2	2	4	1	1	3	1	1	1	3	3	3	3	4	3	4	3	3	3	4	4	2	2	3	2	4	3	2	2	2	2	2	2	3	4	7	7	3	3	3	3	无	3	3.5	3.5	3.33333	2.25
1645	2	1	3	2	2	3	3	3	2	1	4	5	6	5	7	4	4	4	4	6	5	6	6	4	4	4	4	7	7	7	7	3	5	4	5	4	4	4	4	4	4	4	4	无	5.75	4	5.75	5.16667	4
1646	1	1	3	2	2	2	2	5	2	2	1	5	4	6	7	7	7	7	7	7	6	5	5	7	7	7	5	5	5	6	5	3	3	7	4	4	4	4	7	4	5	5	4	暂无	5.5	7	5.75	6.08333	6.5
1647	1	1	3	2	1	1	2	4	2	1	1	5	3	5	4	4	4	3	4	5	3	5	4	5	4	5	4	3	4	3	3	4	5	4	3	4	3	4	3	3	3	5	4	无	4.25	3.75	4.25	4.08333	4.5
1648	2	1	5	2	4	1	1	2	2	1	1	5	4	5	4	2	3	2	3	5	6	4	5	6	5	5	6	5	6	6	3	4	5	6	4	5	4	6	4	4	5	6	5	无	4.5	2.5	5	4	5.5
1649	1	1	1	1	3	1	1	3	2	2	4	4	4	4	4	4	4	4	4	4	4	4	4	4	4	4	4	4	4	4	4	4	4	4	4	4	4	4	4	4	4	4	4	无	4	4	4	4	4
1650	2	1	2	1	2	2	1	5	2	3	2	6	4	2	7	7	7	7	7	3	4	4	4	7	7	4	5	4	4	4	4	4	4	4	4	1	1	1	6	1	1	1	1	无	4.75	7	3.75	5.16667	5.75
1651	1	1	2	2	1	1	1	4	2	3	4	7	7	7	7	7	7	7	7	7	7	7	7	7	7	7	7	7	7	7	7	7	7	7	7	7	7	7	7	7	7	7	7	无	7	7	7	7	7
1652	1	1	3	2	4	1	1	1	1	1	4	3	3	3	3	3	3	3	3	3	3	3	3	3	3	3	3	3	3	3	3	3	3	3	3	3	3	3	3	3	3	3	3	无	3	3	3	3	3
1653	2	1	3	2	4	2	2	1	2	2	4	3	3	2	5	3	2	5	3	3	4	3	4	4	4	6	6	3	3	3	3	4	5	4	5	4	3	3	5	3	5	5	3	无	3.25	3.25	3.5	3.33333	5
1654	2	1	5	2	2	2	2	4	1	1	1	5	5	4	5	4	3	4	3	3	5	6	6	4	3	3	3	5	3	3	2	2	3	2	2	3	3	3	3	3	4	4	4	无	4.75	3.5	5	4.41667	3.25
1655	2	1	2	2	2	2	2	1	2	1	4	5	5	4	5	3	3	4	3	6	4	4	4	4	5	4	3	4	4	3	5	4	5	5	5	4	4	4	4	3	4	4	3	想要更多实习机会与实操课程	4.75	3.25	4.5	4.16667	4
1656	1	3	3	1	2	2	1	1	1	1	3	7	7	7	4	4	6	6	6	7	7	7	7	7	7	7	7	7	7	7	7	7	7	7	7	4	4	4	4	7	7	7	7	无	6.25	5.5	7	6.25	7
1657	2	1	3	2	3	1	1	3	2	1	1	4	3	3	3	4	3	3	3	3	3	3	3	3	3	3	4	4	3	4	3	1	2	2	2	4	4	4	4	4	4	4	4	无	3.25	3.25	3	3.16667	3.25
1658	2	1	3	2	4	2	1	1	2	1	4	7	7	7	7	7	7	7	7	7	7	7	7	7	7	7	7	7	7	7	7	7	7	7	7	7	7	7	7	7	7	7	7	有帮助	7	7	7	7	7
1659	2	1	3	2	2	2	2	3	1	2	4	4	3	4	4	4	4	4	4	4	4	4	4	4	4	4	4	4	4	4	4	4	4	4	4	4	4	4	4	5	5	5	5	无	3.75	4	4	3.91667	4
1660	2	1	3	2	3	1	1	3	2	3	4	5	3	4	5	4	4	5	4	4	4	4	4	4	4	4	4	4	4	4	4	4	4	4	4	4	4	4	4	4	4	4	4	无	4.25	4.25	4	4.16667	4
1661	2	1	3	2	4	3	1	2	2	1	4	3	2	4	6	4	4	5	4	4	4	4	4	4	4	4	4	5	4	4	4	4	4	4	4	4	4	4	4	4	4	4	4	有帮助	3.75	4.25	4	4	4
1662	2	4	2	2	4	1	2	1	2	1	1	7	6	6	7	7	6	6	6	7	7	6	3	3	7	7	7	7	4	7	5	4	7	5	7	7	7	7	7	7	7	5	7	无	6.5	6.25	5.75	6.16667	6
1663	2	4	2	2	2	3	2	4	1	1	1	6	6	6	6	6	5	4	4	6	6	6	6	5	4	4	5	5	5	5	4	4	4	4	6	5	5	5	5	5	5	5	5	无	6	4.75	6	5.58333	4.5
1664	2	1	3	2	2	2	2	2	2	1	2	3	2	2	4	3	3	4	4	3	3	3	3	4	4	4	4	5	5	5	5	3	4	3	4	4	3	3	4	5	5	5	4	无	2.75	3.5	3	3.08333	4
1666	2	1	2	2	4	1	1	4	2	2	1	1	1	6	6	2	2	7	2	2	2	2	2	2	2	2	2	2	2	2	2	2	2	2	2	2	2	2	2	2	2	2	2	无	3.5	3.25	2	2.91667	2
1667	1	1	3	2	2	1	2	4	2	2	1	4	4	4	4	4	4	4	4	4	4	4	4	4	4	4	4	4	4	4	4	4	4	4	4	4	4	4	4	4	4	4	4	多开设专业课程	4	4	4	4	4
1668	1	1	1	1	4	2	2	4	2	3	2	4	4	4	4	3	3	3	4	3	3	3	5	5	4	6	4	5	4	4	3	2	3	3	3	3	4	4	3	4	4	3	3	无	4	3.25	3.5	3.58333	4.75
1669	2	1	3	2	4	1	1	4	2	1	4	4	3	3	6	5	5	4	4	4	3	6	5	5	5	6	6	6	3	5	3	4	5	4	4	6	6	5	6	5	4	6	6	无	4	4.5	4.5	4.33333	5.5
1670	2	1	3	2	4	1	1	3	2	1	4	6	5	5	5	5	5	5	6	5	6	6	5	6	6	6	6	6	6	6	5	5	7	6	6	7	7	7	7	7	6	6	6	无	5.25	5.25	5.5	5.33333	6
1671	2	3	3	1	2	2	1	2	1	1	2	6	4	4	4	4	4	4	4	4	5	5	5	4	4	4	4	4	4	4	4	4	4	4	4	4	4	4	4	4	4	4	4	无	4.5	4	4.75	4.41667	4
1672	1	4	3	2	3	2	2	4	2	3	3	4	3	4	4	5	4	5	4	4	5	4	4	5	4	4	5	5	4	4	3	4	5	4	4	5	4	4	6	5	4	4	4	无	3.75	4.5	4.25	4.16667	4.5
1673	2	1	2	2	2	2	3	1	2	1	4	7	2	6	7	4	4	3	6	5	5	5	5	4	4	5	6	7	7	6	4	4	5	3	4	4	3	4	5	3	3	4	3	少点形式	5.5	4.25	5	4.91667	4.75
1674	2	2	3	2	2	2	2	1	1	2	1	5	4	5	5	5	5	4	5	5	5	5	5	5	5	5	5	5	5	5	5	5	5	5	5	5	5	3	5	6	5	4	5	无	4.75	4.75	5	4.83333	5
1675	2	1	3	2	2	2	1	4	2	1	1	7	5	5	7	7	7	7	3	1	1	1	1	1	1	1	1	1	1	1	1	1	2	1	4	1	2	2	1	1	1	1	1	无	6	6	1	4.33333	1
1676	2	2	3	2	2	3	3	4	2	2	1	5	5	5	5	5	4	5	5	5	5	5	5	5	5	5	5	5	5	5	5	5	5	5	5	6	4	5	4	6	4	5	3	无	5	4.75	5	4.91667	5
1677	2	1	3	2	2	3	3	3	2	2	4	6	3	4	2	7	5	6	3	3	3	5	2	2	3	4	3	6	5	2	2	2	2	4	2	3	3	3	4	2	5	2	4	老师可以普及很多课外知识	3.75	5.25	3.25	4.08333	3
1678	2	1	3	2	4	2	3	2	2	2	2	4	4	4	4	4	4	4	4	4	4	4	4	4	4	4	4	4	4	4	4	4	4	4	4	4	4	4	4	4	4	4	4	无	4	4	4	4	4
1679	1	1	3	2	4	2	2	2	2	1	4	4	4	4	4	4	4	4	4	4	4	4	4	4	4	4	4	4	4	4	4	4	4	4	4	4	4	4	4	4	4	4	4	无	4	4	4	4	4
1680	2	1	3	2	2	3	2	1	2	1	1	7	7	7	7	7	7	7	7	7	7	7	7	7	7	7	7	7	7	7	7	7	7	7	7	7	7	7	7	7	7	7	7	无	7	7	7	7	7
1681	1	1	3	2	3	1	1	3	2	1	1	7	7	7	7	7	7	7	7	7	7	7	7	7	7	7	7	7	7	7	7	7	7	7	7	7	7	7	7	7	7	7	7	无	7	7	7	7	7
1682	2	1	2	2	1	4	4	1	2	3	4	1	1	1	1	1	1	1	1	7	7	7	7	7	7	7	7	7	7	7	7	7	7	7	7	7	7	7	7	7	7	7	7	可以	1	1	7	3	7
1683	2	1	3	2	4	3	3	5	2	2	4	3	2	2	4	2	2	2	4	4	3	4	4	3	3	3	4	6	4	3	4	3	3	3	4	4	3	3	3	3	3	3	3	没有	2.75	2.5	3.75	3	3.25
1684	2	1	3	2	4	1	1	2	1	2	1	5	5	5	5	4	4	7	6	6	6	6	6	6	6	6	6	6	6	6	6	6	6	6	6	6	6	6	6	6	6	6	5	我认为我们这个专业最主要的是通过实践与理论相结合的方法来帮助我提升自己的专业技能	5	5.25	6	5.41667	6
1685	1	1	3	2	2	1	1	5	2	1	1	4	1	1	4	1	1	4	4	1	4	4	4	7	1	4	4	7	1	1	4	1	7	4	4	4	4	7	4	4	4	4	4	无	2.5	2.5	3.25	2.75	4
1686	2	1	3	2	4	1	2	4	1	2	1	5	5	5	4	4	4	4	4	4	4	4	4	4	4	5	4	5	4	5	4	5	4	5	4	3	5	4	4	5	4	4	4	无	4.75	4	4	4.25	4.25
1687	2	1	3	2	4	2	2	3	2	1	1	4	4	4	4	4	4	4	4	4	4	4	4	4	4	4	4	4	4	4	4	4	4	4	4	4	4	4	4	4	4	4	4	无	4	4	4	4	4
1688	2	1	3	2	2	3	2	2	2	2	4	5	4	4	4	4	4	4	4	4	4	4	4	4	4	4	4	4	4	4	4	4	4	4	4	4	4	4	4	4	4	4	4	无	4.25	4	4	4.08333	4
1689	1	1	3	2	4	1	1	3	2	3	4	1	1	1	7	4	3	5	3	4	5	4	4	5	4	5	4	5	4	5	4	5	4	4	4	5	5	5	5	5	3	3	3	无	2.5	3.75	4.25	3.5	4.5
1690	1	1	3	2	2	3	2	1	1	1	1	3	4	4	4	5	4	4	4	5	4	3	4	5	4	3	4	5	3	3	3	3	3	3	3	4	4	4	4	4	4	4	4	无	3.75	4.25	4	4	4
1691	2	1	3	2	2	2	2	1	2	1	4	7	4	6	7	4	4	6	6	6	7	6	6	7	7	5	7	7	6	5	4	3	6	5	6	6	6	6	7	7	5	6	7	结合社会职业市场而不是仅仅是考试	6	5	6.25	5.75	6.5
1692	2	1	2	2	4	1	1	2	2	3	1	5	5	5	5	2	2	3	2	4	4	4	4	3	3	4	4	5	3	3	5	3	5	4	6	4	4	4	4	3	3	3	3	无	5	2.25	4	3.75	3.5
1693	2	1	3	2	4	3	1	1	1	2	1	7	6	6	7	7	7	7	7	7	6	6	7	6	2	6	6	7	6	7	7	6	7	7	7	7	7	7	7	6	7	7	6	无	6.5	7	6.5	6.66667	5
1694	2	2	2	2	2	2	2	3	1	1	4	3	3	3	3	3	3	3	3	3	3	3	3	3	3	3	3	3	3	3	3	3	3	3	3	3	3	3	3	3	3	3	3	无	3	3	3	3	3
1695	2	1	3	2	4	1	1	2	1	1	1	7	4	5	5	7	6	6	5	5	5	5	5	4	3	4	4	5	4	4	4	4	5	5	5	5	5	5	5	5	5	5	5	实时政策	5.25	6	5	5.41667	3.75
1696	1	1	5	2	4	1	1	3	2	3	2	3	3	3	3	2	2	2	2	2	2	2	2	2	2	2	2	2	2	2	2	2	2	2	2	2	2	2	2	2	2	2	2	无	3	2	2	2.33333	2
1697	1	1	5	2	1	2	1	2	1	1	1	7	7	7	7	7	7	7	7	7	7	7	7	7	7	7	7	7	7	7	7	7	7	7	7	7	7	7	7	7	7	7	7	无	7	7	7	7	7
1698	2	1	3	1	3	1	2	1	2	2	2	7	7	7	7	7	7	7	7	7	7	7	7	4	5	4	4	4	4	4	4	4	4	4	4	4	4	4	4	4	4	4	4	无	7	7	7	7	4.25
1699	2	1	2	1	3	2	2	3	2	2	2	5	4	3	6	5	5	3	4	5	4	5	4	5	4	5	6	5	5	6	4	3	4	5	4	6	5	5	4	5	4	5	4	无	4.5	4.25	4.5	4.41667	5
1700	2	1	5	1	4	1	2	2	2	1	4	1	1	4	1	3	2	3	1	4	4	1	3	3	3	3	3	3	3	3	3	3	3	3	3	3	3	3	3	3	3	3	3	没有	1.75	2.25	3	2.33333	3
1701	2	1	3	2	4	1	1	3	1	2	1	6	6	5	4	5	4	3	4	3	4	3	3	3	3	3	3	4	3	4	3	3	3	3	3	4	4	4	4	3	4	4	4	无	5.25	4	3.25	4.16667	3
1702	2	4	3	2	2	2	2	2	2	1	3	7	7	7	7	7	7	7	7	7	7	7	7	7	7	7	7	7	7	7	7	7	7	7	7	7	7	7	7	7	7	7	7	无	7	7	7	7	7
1703	1	1	3	2	4	1	1	3	2	1	4	1	1	1	1	1	1	1	1	1	1	1	1	1	1	1	1	1	1	1	1	1	1	1	1	1	1	7	6	4	7	5	5	无	1	1	1	1	1
1704	2	1	5	2	2	3	3	2	1	1	1	7	7	4	7	4	4	7	4	4	4	4	4	4	4	4	4	7	7	7	7	7	7	7	7	6	6	4	6	7	7	7	7	无	6.25	4.75	4	5	4
1705	2	1	3	2	2	4	3	2	1	2	1	4	3	3	6	5	4	5	5	4	4	3	3	5	3	3	5	5	3	4	3	3	3	5	5	5	5	4	6	4	4	5	4	无	4	4.75	3.5	4.08333	4
1706	1	1	3	2	2	3	3	3	2	2	4	7	5	4	7	6	6	6	5	5	6	5	4	7	7	7	6	7	6	7	6	7	7	7	7	7	7	7	7	7	7	7	7	无	5.75	5.75	5	5.5	6.75
1707	1	1	3	2	4	2	2	2	1	1	4	5	5	5	5	1	1	1	1	2	5	5	5	4	4	4	4	4	4	4	4	4	4	4	4	3	4	4	6	4	4	4	4	减少点没有意义的课什么劳务啊，可以多让同学们多选点选修课	5	1	4.25	3.41667	4
1708	2	2	3	2	3	1	1	3	2	1	1	5	4	4	6	4	4	4	5	5	5	5	5	5	5	5	5	5	5	5	4	4	4	4	4	4	4	4	4	4	4	4	4	无	4.75	4.25	5	4.66667	5
1709	2	1	3	2	2	3	2	1	1	1	1	5	6	6	5	4	3	5	5	7	7	7	7	5	4	6	7	7	5	5	6	4	6	7	7	6	7	6	6	5	6	7	7	无	5.5	4.25	7	5.58333	5.5
1710	2	1	5	1	3	1	1	2	1	1	1	4	4	4	4	4	4	4	4	4	4	4	4	4	4	4	4	4	4	4	4	4	4	4	4	4	4	4	4	4	4	4	4	无	4	4	4	4	4
1711	2	1	2	2	2	3	3	2	1	2	4	4	4	4	4	4	4	4	4	4	4	4	4	4	4	4	4	4	4	4	4	4	4	4	4	4	4	4	4	4	4	4	4	没有	4	4	4	4	4
1712	2	2	3	2	2	3	3	1	2	1	4	7	7	6	6	6	6	6	6	6	6	6	6	6	6	6	6	6	6	6	6	6	6	6	6	6	6	6	6	6	6	6	6	无	6.5	6	6	6.16667	6
1713	2	1	3	2	2	2	2	2	2	1	1	4	4	4	4	4	4	4	4	4	4	4	4	4	4	4	4	4	4	4	4	4	4	4	4	4	4	4	4	4	4	4	4	希望能运用具体案例。	4	4	4	4	4
1714	1	1	3	2	4	2	1	4	2	2	4	4	4	4	4	5	5	4	4	5	5	4	4	5	4	6	4	6	5	5	6	5	5	5	5	6	6	6	6	6	6	6	6	无	4	4.5	4.5	4.33333	4.75
1715	2	1	3	2	2	3	3	2	1	1	4	4	5	4	7	4	5	5	5	3	5	5	5	5	6	4	6	7	4	4	5	6	6	5	5	6	6	7	6	6	6	7	5	没有	5	4.75	4.5	4.75	5.25
1716	2	1	3	2	3	1	1	3	1	1	4	5	4	3	3	6	4	6	5	5	5	6	4	5	5	5	5	5	5	6	5	3	3	3	6	4	4	4	4	4	4	4	4	暂时没有	3.75	5.25	5	4.66667	5
1717	1	4	3	2	2	2	2	3	1	1	3	4	4	4	4	4	4	4	4	4	4	4	4	4	4	4	4	4	4	4	4	4	4	4	4	4	4	4	4	4	4	4	4	无	4	4	4	4	4
1718	2	1	5	2	2	2	2	4	1	1	1	4	4	3	7	5	5	6	4	4	5	5	5	5	5	5	4	5	3	3	4	3	5	5	5	4	3	4	7	4	4	4	2	无	4.5	5	4.75	4.75	4.75
1719	1	1	3	2	2	2	2	4	2	1	4	7	7	7	7	7	7	7	7	7	7	7	7	7	7	7	7	7	7	7	7	7	7	7	7	7	7	7	7	7	7	7	7	无	7	7	7	7	7
1720	1	1	3	2	4	2	2	4	2	1	1	3	2	2	5	6	6	6	4	3	4	4	3	3	3	3	3	3	3	4	5	5	4	5	2	2	5	4	5	3	5	4	4	无	3	5.5	3.5	4	3
1721	2	1	3	2	3	3	3	3	1	1	4	7	6	7	6	5	6	4	5	4	5	6	4	6	6	6	6	6	6	6	6	6	6	6	6	6	6	6	6	6	6	6	6	教一些实用知识	6.5	5	4.75	5.41667	6
1722	2	3	3	1	1	4	4	4	1	2	1	2	5	5	5	4	4	5	6	3	5	5	4	4	6	5	5	3	5	3	5	5	1	5	3	2	5	5	2	3	5	3	5	没有	4.25	4.75	4.25	4.41667	5
1723	2	1	3	2	2	2	3	2	1	1	4	5	5	4	4	4	4	4	4	4	4	4	4	4	4	4	4	4	4	4	4	4	4	4	4	7	7	7	7	7	7	7	7	无	4.5	4	4	4.16667	4
1724	2	1	3	2	2	2	2	1	2	1	4	4	3	5	4	4	4	4	5	4	5	5	5	4	3	3	5	6	5	7	3	3	5	3	5	4	5	4	5	5	3	6	4	帮助明确想要深造学业应该往哪些方面努力，重点学什么	4	4.25	4.75	4.33333	3.75
1725	2	1	3	2	2	2	2	2	2	1	4	4	2	4	5	2	2	6	5	2	4	5	5	4	4	4	4	4	4	4	4	4	4	4	4	4	4	4	4	4	4	4	4	无	3.75	3.75	4	3.83333	4
1726	2	2	3	1	2	3	2	1	1	1	4	7	7	7	7	7	7	7	7	7	7	7	7	7	7	7	7	7	7	7	7	7	7	7	7	7	7	7	7	7	7	7	7	无	7	7	7	7	7
1727	2	1	3	2	2	1	1	2	1	1	4	7	7	7	7	7	7	7	7	7	7	7	7	7	7	7	7	7	7	7	7	7	7	7	7	7	7	7	7	7	7	7	7	无	7	7	7	7	7
1728	2	3	2	1	2	3	3	1	1	1	1	7	7	7	7	7	7	7	7	7	7	7	7	7	7	7	7	7	7	7	7	7	7	7	7	7	7	7	7	7	7	7	7	无	7	7	7	7	7
1729	1	1	3	2	2	2	2	4	2	2	1	4	4	4	4	4	4	4	4	4	4	4	4	4	4	4	4	4	4	4	4	4	4	4	4	4	4	4	4	4	4	4	4	无	4	4	4	4	4
1730	1	1	3	2	4	1	1	1	1	2	2	5	5	5	5	5	5	5	5	5	5	5	5	5	5	5	5	5	5	5	5	5	5	5	5	5	5	5	5	5	5	5	5	无	5	5	5	5	5
1731	2	3	2	1	4	1	1	3	2	3	4	5	5	5	5	5	5	5	5	5	5	5	5	5	5	5	5	5	5	5	5	5	5	5	5	5	5	5	5	5	5	5	5	无	5	5	5	5	5
1732	1	1	3	2	4	1	1	5	2	1	1	5	2	2	5	6	5	6	3	4	4	4	4	4	4	4	4	7	7	7	7	3	3	3	3	3	3	3	3	5	5	5	5	无	3.5	5	4	4.16667	4
1733	2	1	3	2	4	1	1	5	2	2	1	7	7	7	7	7	7	7	7	7	7	7	7	7	7	7	7	7	7	7	7	7	7	7	7	7	7	7	7	7	7	7	7	行	7	7	7	7	7
1734	2	1	3	2	2	3	1	1	1	1	1	7	7	7	7	7	7	7	7	7	7	7	7	7	7	7	7	7	7	7	7	7	7	7	7	7	7	7	7	7	7	7	7	无	7	7	7	7	7
1735	2	1	3	2	4	1	1	3	2	2	1	4	4	4	4	4	4	4	4	4	4	4	4	4	4	4	4	4	4	4	4	4	4	4	4	4	4	4	4	4	4	4	4	无	4	4	4	4	4
1736	2	3	3	2	1	4	3	4	2	2	4	5	5	5	5	5	5	5	5	5	5	5	5	5	5	5	5	5	5	5	5	5	5	5	5	5	5	5	5	5	5	5	5	加油	5	5	5	5	5
1737	1	3	3	2	2	2	1	1	1	1	1	7	7	7	7	7	7	7	7	7	7	7	7	7	7	7	7	7	7	7	7	7	7	7	7	7	7	7	7	7	7	7	7	无	7	7	7	7	7
1738	1	3	3	2	4	1	1	3	1	3	1	4	4	3	3	4	3	3	4	3	4	3	3	3	4	3	3	3	4	2	2	2	2	2	2	3	3	3	4	3	3	3	3	无	3.5	3.5	3.25	3.41667	3.25
1739	2	3	5	2	4	1	1	4	2	1	2	4	4	4	4	4	4	4	4	4	4	4	4	4	4	4	4	4	4	4	4	4	4	4	4	4	4	4	4	4	4	4	4	无	4	4	4	4	4
1740	2	1	3	2	4	1	1	3	2	3	1	4	3	6	5	4	2	6	1	2	2	2	2	2	3	4	5	5	2	3	3	2	4	2	5	2	2	2	4	4	3	4	3	可以多介绍一下职业	4.5	3.25	2	3.25	3.5
1741	1	3	3	2	3	1	1	1	1	1	1	6	5	6	6	5	5	4	4	5	4	4	4	4	4	4	4	5	6	5	5	5	5	6	6	5	5	5	5	5	4	5	4	无	5.75	4.5	4.25	4.83333	4
1742	2	3	3	2	4	1	1	1	1	1	1	4	4	4	4	4	4	4	4	4	4	4	4	4	4	4	4	4	4	4	4	4	4	4	4	4	4	4	4	4	4	4	4	无	4	4	4	4	4
1743	1	3	3	2	4	4	4	4	1	1	3	7	7	7	7	7	7	7	7	7	7	7	7	7	7	7	7	7	7	7	7	7	7	7	7	7	7	7	7	7	7	7	7	无	7	7	7	7	7
1744	2	3	3	2	4	1	1	2	2	2	3	4	4	4	4	4	4	4	4	4	4	4	4	4	4	4	4	4	4	4	4	4	4	4	4	4	4	4	4	4	4	4	4	无	4	4	4	4	4
1745	2	3	3	2	4	1	1	1	2	1	1	5	5	5	5	5	5	5	5	5	5	5	5	5	5	5	5	5	5	5	5	5	5	5	5	5	5	5	5	5	5	5	5	五	5	5	5	5	5
1746	1	3	3	2	4	1	1	5	2	3	3	4	4	4	4	4	4	4	4	4	4	4	4	4	4	4	4	4	4	4	4	4	4	4	4	4	4	4	4	4	4	4	4	无	4	4	4	4	4
1747	2	3	3	2	4	1	1	4	2	2	1	4	4	4	5	4	4	4	4	3	3	3	3	4	4	3	5	4	3	4	3	4	3	4	3	4	3	3	4	3	4	3	3	没有	4.25	4	3	3.75	4
1748	1	3	3	2	2	2	1	2	1	2	3	6	2	4	4	6	6	6	6	6	6	6	6	6	6	6	6	6	6	6	6	6	6	6	6	6	6	6	6	6	6	6	6	无	4	6	6	5.33333	6
1749	1	3	5	2	4	2	2	3	2	1	1	7	7	7	7	7	7	7	7	7	7	7	7	7	7	7	7	7	7	7	7	7	7	7	7	7	7	7	7	7	7	7	7	无	7	7	7	7	7
1750	1	3	3	2	2	2	1	5	2	3	4	4	1	3	5	6	6	7	3	2	3	4	3	6	6	7	5	4	4	4	3	1	1	1	1	4	4	4	4	4	3	3	3	无	3.25	5.5	3	3.91667	6
1751	2	3	3	2	2	2	2	1	1	1	1	6	6	6	6	5	5	5	5	4	4	4	4	5	5	5	5	6	6	6	6	6	6	6	6	7	7	7	7	4	4	5	5	暂无	6	5	4	5	5
1752	2	3	3	2	4	1	1	2	2	2	3	5	4	4	4	4	4	4	4	4	4	5	4	4	4	4	4	4	4	4	4	4	4	4	4	4	4	4	4	4	4	4	4	对职业规划的帮助不够实际	4.25	4	4.25	4.16667	4
1753	2	3	3	2	4	1	3	2	1	2	3	7	6	6	6	3	3	6	2	5	5	5	5	5	5	5	5	5	5	5	5	5	5	5	5	5	5	5	5	5	5	5	5	无	6.25	3.5	5	4.91667	5
1754	2	3	3	2	2	2	2	4	1	1	1	4	4	4	4	4	4	4	4	4	4	4	4	4	4	4	4	4	4	4	4	4	4	4	4	4	4	4	4	4	4	4	4	无	4	4	4	4	4
1755	2	1	1	1	1	4	4	5	2	3	4	1	1	1	1	1	1	1	1	1	1	1	1	1	2	4	4	2	4	3	3	6	3	5	5	1	3	5	2	4	4	1	3	好	1	1	1	1	2.75
1756	2	3	3	2	4	1	2	1	2	2	1	2	2	2	2	3	3	3	3	2	2	2	2	3	2	3	3	4	3	3	3	3	3	2	3	3	3	3	3	3	3	3	3	暂时没有不好意思	2	3	2	2.33333	2.75
1757	1	3	3	2	4	1	1	5	2	3	3	7	7	7	7	7	7	7	7	7	7	7	7	7	7	7	7	1	7	1	1	1	1	1	1	7	7	7	7	7	7	7	7	无	7	7	7	7	7
1758	2	3	5	2	3	1	1	2	2	2	1	4	4	4	4	4	4	4	4	4	4	4	4	4	4	4	4	4	4	4	4	4	4	4	4	4	4	4	4	4	4	4	4	无	4	4	4	4	4
1759	2	3	3	2	3	2	2	3	2	2	1	4	4	4	4	3	3	5	3	3	3	5	6	3	3	5	4	3	3	4	5	3	3	4	4	3	4	4	3	4	3	4	4	无	4	3.5	4.25	3.91667	3.75
1760	2	3	3	2	2	1	1	3	1	1	4	6	3	6	4	5	5	4	6	6	5	5	6	5	4	4	4	6	7	4	4	3	5	3	4	5	4	4	4	4	4	4	3	无	4.75	5	5.5	5.08333	4.25
1761	2	3	3	2	3	1	1	4	2	3	1	5	5	4	5	5	4	5	6	5	6	5	5	5	5	5	5	5	5	5	5	5	5	5	5	5	5	5	5	5	5	5	5	无	4.75	5	5.25	5	5
1762	2	3	5	2	4	1	1	5	2	3	3	5	5	5	5	5	5	5	5	6	6	6	5	6	5	6	5	6	6	5	6	6	5	5	5	5	6	5	5	5	5	6	5	没有	5	5	5.75	5.25	5.5
1763	2	3	3	2	2	3	3	4	2	2	4	7	4	2	6	5	5	5	5	5	5	5	5	5	5	3	5	5	3	3	5	5	5	5	5	5	5	5	5	5	5	4	4	无	4.75	5	5	4.91667	4.5
1764	2	3	3	2	3	1	1	3	2	2	3	4	3	2	2	2	2	2	2	2	2	2	2	2	2	2	2	2	2	2	2	2	2	2	2	2	2	2	2	2	2	2	2	无	2.75	2	2	2.25	2
1765	2	3	3	2	3	1	1	1	1	2	3	7	7	7	7	4	4	4	5	7	7	7	7	7	7	7	7	7	7	7	7	7	7	7	7	7	7	7	7	7	7	7	7	无	7	4.25	7	6.08333	7
1766	1	3	3	2	3	1	1	3	1	2	1	7	7	7	7	7	7	7	7	7	7	7	7	7	7	7	7	7	7	7	7	7	7	7	7	7	7	7	7	7	7	7	7	无	7	7	7	7	7
1767	2	3	3	2	4	3	3	1	1	1	2	6	1	2	6	4	4	4	4	4	3	3	3	3	3	3	3	5	5	4	2	1	4	5	4	6	4	6	7	5	4	4	4	无	3.75	4	3.25	3.66667	3
1768	1	1	3	2	4	1	1	3	2	1	2	6	5	5	5	5	5	6	5	5	5	5	5	5	5	5	5	5	5	5	5	5	6	5	5	5	5	5	5	5	6	5	6	无	5.25	5.25	5	5.16667	5
1769	2	3	3	2	4	2	1	4	2	3	3	5	3	3	6	6	6	6	6	6	6	6	6	6	6	6	6	6	4	4	4	2	2	2	2	2	3	3	5	6	6	6	6	无	4.25	6	6	5.41667	6
1770	2	3	2	2	4	1	1	4	2	2	1	4	4	4	4	4	4	4	4	4	4	4	4	4	4	4	4	4	4	4	4	4	4	4	4	4	4	4	4	4	4	4	4	无	4	4	4	4	4
1771	2	3	3	2	4	1	1	5	2	2	1	5	4	4	4	5	5	5	5	5	5	5	5	5	5	5	5	5	5	5	5	5	5	5	4	5	4	6	6	6	6	6	4	无	4.25	5	5	4.75	5
1772	2	3	3	2	4	3	1	1	2	1	3	7	7	6	6	7	6	6	7	7	6	6	7	7	7	7	7	7	7	7	6	6	6	7	6	7	7	6	7	7	6	7	7	无	6.5	6.5	6.5	6.5	7
1773	1	3	5	2	4	2	2	3	2	2	1	5	5	5	5	5	5	5	5	5	5	5	5	5	5	5	5	5	5	5	5	5	5	5	5	5	5	5	5	5	5	5	5	无	5	5	5	5	5
1774	2	3	3	2	4	1	1	2	1	1	1	4	4	4	4	4	4	4	4	4	4	4	4	4	4	4	4	4	4	4	4	4	4	4	4	4	4	4	4	4	4	4	4	无	4	4	4	4	4
1775	2	3	3	2	2	2	2	3	1	2	2	7	7	7	7	7	7	7	7	7	7	7	7	7	7	7	7	7	7	7	7	7	7	7	7	7	7	7	7	7	7	7	7	无	7	7	7	7	7
1776	2	3	3	2	4	1	1	3	2	2	3	5	5	5	5	5	5	5	5	5	5	5	5	5	5	5	5	5	4	5	5	5	4	4	5	7	7	7	7	6	6	6	6	无	5	5	5	5	5
1777	2	3	2	2	3	1	1	3	2	3	2	5	5	5	5	5	5	5	5	5	5	5	5	5	5	5	5	5	4	5	4	4	5	5	4	5	4	4	5	4	5	4	5	无	5	5	5	5	5
1778	2	3	3	2	2	2	2	2	1	2	1	5	5	2	4	4	4	4	4	4	4	4	4	6	4	5	4	5	3	4	4	5	4	5	4	4	3	5	4	5	4	4	5	无	4	4	4	4	4.75
1779	2	3	5	2	2	2	2	1	1	1	3	7	5	5	5	6	6	6	6	6	5	5	6	7	7	6	5	7	7	7	5	7	7	5	7	7	7	7	7	7	6	7	7	无	5.5	6	5.5	5.66667	6.25
1780	2	3	2	2	1	3	3	4	2	2	1	4	4	4	4	4	4	4	4	4	4	4	4	4	4	4	4	4	4	4	4	4	4	4	4	4	4	4	4	4	4	4	4	无	4	4	4	4	4
1781	2	3	3	2	2	2	2	1	1	1	2	7	7	7	7	7	7	7	7	7	7	7	7	7	7	7	7	7	7	7	7	7	7	7	7	7	7	7	7	7	7	7	7	无	7	7	7	7	7
1782	2	1	3	2	2	2	2	4	2	1	2	3	2	5	6	6	7	7	6	4	3	2	3	5	6	7	7	3	5	4	3	2	5	3	5	5	3	5	7	6	5	5	2	无	4	6.5	3	4.5	6.25
1783	1	3	5	2	2	1	1	4	1	1	1	7	7	7	7	7	7	7	7	7	7	7	7	7	7	7	7	7	7	7	7	7	7	7	7	7	7	7	7	7	7	7	7	无	7	7	7	7	7
1784	1	3	3	2	4	1	1	3	1	3	3	7	5	5	5	4	4	3	3	4	4	5	4	4	5	4	4	5	4	4	5	4	5	4	5	4	5	5	4	5	4	5	4	无	5.5	3.5	4.25	4.41667	4.25
1785	2	3	2	2	4	2	2	1	2	3	1	6	6	6	6	6	5	5	5	4	4	4	6	4	4	4	4	4	4	4	4	3	4	4	4	5	5	5	5	5	5	5	5	无	6	5.25	4.5	5.25	4
1786	1	3	2	2	2	3	3	4	2	1	3	7	7	7	7	7	7	7	7	7	7	7	7	7	7	7	7	7	7	7	7	7	7	7	7	7	7	7	7	7	7	7	7	无	7	7	7	7	7
1787	1	3	3	2	1	2	3	5	2	3	3	7	7	7	7	7	7	7	7	7	7	7	7	7	7	7	7	7	7	7	7	7	7	7	7	7	7	7	7	7	7	7	7	无	7	7	7	7	7
1788	2	3	3	2	2	3	3	1	1	2	3	7	7	7	7	7	7	7	7	7	7	7	7	7	7	7	7	7	7	7	7	7	7	7	7	7	7	7	7	7	7	7	7	无	7	7	7	7	7
1789	1	3	3	2	1	3	1	1	1	1	4	3	3	6	6	6	6	6	6	6	6	6	3	6	6	6	6	6	6	6	5	3	4	6	4	3	3	3	4	4	3	5	6	无	4.5	6	5.25	5.25	6
1790	2	3	3	2	2	2	1	4	2	1	1	5	5	5	5	5	5	5	5	5	5	5	5	6	6	6	6	6	6	6	6	4	6	6	6	6	6	6	6	6	6	6	6	无	5	5	5	5	6
1792	2	3	3	2	2	3	3	1	1	1	2	7	7	7	7	7	7	7	7	7	7	7	7	7	7	7	7	7	7	7	7	7	7	7	7	7	7	7	7	7	7	7	7	无	7	7	7	7	7
1793	2	3	5	2	4	1	2	2	2	2	1	5	3	2	4	2	2	2	3	6	6	5	3	3	3	3	5	5	6	5	2	2	3	4	5	4	5	5	4	3	4	5	4	无	3.5	2.25	5	3.58333	3.5
1794	2	3	3	2	4	1	1	3	2	2	1	4	4	4	4	4	4	4	4	4	4	4	4	4	4	4	4	4	4	4	4	4	4	4	4	4	4	4	4	4	4	4	4	无	4	4	4	4	4
1795	1	3	3	2	1	1	1	5	2	1	3	4	4	4	4	4	4	4	4	4	4	4	4	4	4	4	4	4	4	4	4	4	4	4	4	4	4	4	4	4	4	4	4	无	4	4	4	4	4
1796	2	3	2	2	2	2	2	1	1	1	2	1	1	1	1	5	3	6	4	7	5	5	4	4	4	4	4	7	5	4	4	4	4	4	4	4	4	4	4	4	4	4	4	无	1	4.5	5.25	3.58333	4
1797	2	3	3	2	3	2	2	3	1	2	3	4	4	4	4	4	4	4	4	4	4	4	4	4	4	4	4	4	4	4	4	4	4	4	4	4	4	4	4	4	4	4	4	无	4	4	4	4	4
1798	2	3	5	2	4	1	1	1	2	1	1	5	5	4	4	4	5	4	4	4	5	4	5	3	4	4	5	3	5	3	4	3	4	3	4	3	4	4	3	4	5	5	4	无	4.5	4.25	4.5	4.41667	4
1799	2	1	3	2	4	1	1	3	2	1	1	5	4	4	4	4	4	4	4	4	4	4	4	4	4	4	4	4	4	4	4	4	4	4	4	4	4	4	4	4	4	4	4	越来越好	4.25	4	4	4.08333	4
1800	2	3	3	2	4	1	1	2	2	2	3	5	5	5	5	4	4	5	5	6	6	6	6	6	6	6	6	6	6	6	6	6	6	6	6	6	6	6	6	6	6	6	6	无	5	4.5	6	5.16667	6
1801	2	3	2	2	2	1	1	5	2	2	2	4	6	6	6	2	2	2	5	5	5	2	2	2	2	3	2	4	4	4	2	3	3	3	3	4	5	3	3	4	4	7	5	无	5.5	2.75	3.5	3.91667	2.25
1802	2	1	2	2	2	2	2	2	1	2	3	5	4	5	6	6	6	6	6	5	6	5	5	5	5	6	6	5	5	4	4	4	5	5	5	5	5	5	5	5	5	6	6	无	5	6	5.25	5.41667	5.5
1803	1	3	3	2	2	2	3	4	2	2	2	7	7	7	7	7	7	7	7	7	7	7	7	7	7	7	7	7	7	7	7	7	7	7	7	7	7	7	7	7	7	7	7	否	7	7	7	7	7
1804	1	3	5	2	2	3	2	3	2	3	4	5	6	5	6	5	5	5	5	5	5	5	5	6	6	6	6	6	6	6	6	2	2	2	2	6	6	6	6	6	6	6	6	增加宣讲会	5.5	5	5	5.16667	6
1805	1	3	3	1	2	3	3	5	2	3	3	4	4	4	4	4	4	4	4	4	4	4	4	4	4	4	4	5	5	3	4	5	4	3	3	5	4	4	4	5	4	4	4	无	4	4	4	4	4
1806	2	3	3	2	3	2	1	1	1	2	1	6	3	4	4	5	5	5	5	5	5	5	5	6	6	6	6	4	5	5	4	4	5	5	5	5	5	6	4	5	4	6	6	无	4.25	5	5	4.75	6
1807	2	3	3	2	3	2	1	2	1	1	3	5	1	3	5	4	4	5	4	4	4	5	5	5	5	5	5	6	4	4	3	3	5	5	5	4	4	4	5	3	5	5	5	无	3.5	4.25	4.5	4.08333	5
1808	2	3	3	2	2	2	3	1	2	1	2	4	4	4	4	4	4	4	4	4	4	4	4	4	4	4	4	4	4	4	4	4	4	4	4	4	4	4	4	4	4	4	4	无	4	4	4	4	4
1809	2	3	3	2	3	1	1	4	2	3	4	4	4	4	4	4	4	4	4	4	4	4	4	4	4	4	4	4	4	4	4	4	4	4	4	4	4	4	4	4	4	4	4	无	4	4	4	4	4
1810	2	3	5	2	2	3	3	2	2	2	3	4	4	3	3	5	4	4	4	5	5	3	3	4	4	4	4	4	3	3	3	3	3	4	3	4	2	3	4	4	3	4	3	暂无。	3.5	4.25	4	3.91667	4
1811	2	3	2	2	4	2	1	2	1	2	3	6	6	4	5	4	5	5	3	5	4	3	5	5	5	6	5	6	4	6	4	6	5	6	4	5	5	5	6	5	5	6	6	无	5.25	4.25	4.25	4.58333	5.25
1812	2	3	3	2	2	2	2	5	2	1	1	4	4	4	4	4	4	4	4	4	4	4	4	4	4	4	4	4	4	4	4	4	4	4	4	4	4	4	4	4	4	4	4	无	4	4	4	4	4
1813	2	3	3	2	4	1	1	1	1	2	3	4	5	5	4	5	5	5	5	5	5	5	5	5	5	5	5	6	6	6	3	4	4	4	4	4	4	4	4	4	4	4	4	无	4.5	5	5	4.83333	5
1814	2	3	3	2	2	2	2	1	2	1	3	6	2	6	5	5	5	5	5	5	5	5	5	5	5	5	5	5	5	5	5	2	2	2	5	5	4	5	5	5	5	5	5	多些社会实践	4.75	5	5	4.91667	5
1815	1	3	2	2	2	3	3	1	1	1	3	7	7	7	7	7	7	7	7	7	7	7	7	7	7	7	7	7	7	7	7	7	7	7	7	7	7	7	7	7	7	7	7	无	7	7	7	7	7
1816	2	3	5	2	2	1	1	2	1	1	1	4	4	4	2	5	5	4	2	5	2	5	2	5	5	4	3	5	3	5	5	5	5	4	4	4	3	4	3	5	4	4	3	无	3.5	4	3.5	3.66667	4.25
1817	2	1	3	2	2	2	1	1	2	1	4	5	5	3	7	5	2	6	4	5	5	4	4	6	7	7	4	6	6	3	2	1	1	1	2	1	5	6	7	6	7	7	7	一对一。职业规划。？	5	4.25	4.5	4.58333	6
1818	2	3	2	2	2	1	1	2	2	2	4	7	1	7	7	7	7	7	7	7	7	7	7	7	7	7	7	7	7	7	7	7	7	7	7	7	7	7	7	7	7	7	7	无	5.5	7	7	6.5	7
1819	1	3	5	2	4	1	1	4	2	1	2	5	5	5	5	5	5	5	5	5	5	5	5	5	5	5	5	5	5	5	5	5	5	5	5	5	5	5	5	5	5	5	5	无	5	5	5	5	5
1820	2	3	5	2	4	1	1	1	2	3	1	1	2	1	4	3	3	3	4	7	7	5	3	1	1	2	4	7	7	7	2	1	5	1	1	2	1	1	1	7	7	7	7	无	2	3.25	5.5	3.58333	2
1821	2	3	5	2	4	1	1	3	2	2	1	3	3	3	3	4	4	4	4	4	4	4	4	4	4	4	4	4	4	4	4	3	3	3	3	4	4	4	4	4	4	4	4	无	3	4	4	3.66667	4
1822	2	3	3	2	4	1	2	1	2	3	3	4	4	3	2	3	3	2	2	3	3	4	3	5	5	3	4	5	5	5	2	1	2	2	2	2	2	2	1	5	5	5	5	无	3.25	2.5	3.25	3	4.25
1823	2	3	2	2	2	3	1	3	2	2	4	5	5	5	5	5	5	5	5	5	5	5	5	5	5	5	5	5	5	5	5	5	5	5	5	5	5	5	5	5	5	5	5	无	5	5	5	5	5
1824	2	1	3	1	3	1	1	1	1	1	1	6	6	6	6	6	6	6	6	6	6	6	6	6	6	6	6	6	6	6	6	6	6	6	6	6	6	6	6	6	6	6	6	无	6	6	6	6	6
1825	2	3	3	2	4	1	1	4	1	2	3	7	7	7	7	7	7	7	7	7	7	7	7	7	7	7	7	7	7	7	7	7	7	7	7	7	7	7	7	7	7	7	7	🈚️	7	7	7	7	7
1826	1	3	3	2	1	1	1	4	2	3	4	7	7	7	7	7	7	7	7	7	7	7	7	7	7	7	7	7	7	7	7	7	7	7	7	7	7	7	7	7	7	7	7	无	7	7	7	7	7
1827	2	3	3	2	2	3	3	3	1	2	1	6	5	3	3	3	3	4	3	4	3	3	3	3	3	3	3	5	5	4	4	2	4	2	2	4	4	4	4	4	4	4	4	无	4.25	3.25	3.25	3.58333	3
1828	2	2	3	1	4	1	1	2	1	2	2	6	6	5	6	6	6	6	6	4	6	5	6	6	6	6	6	6	5	6	6	5	6	6	6	6	7	7	7	7	6	6	6	无	5.75	6	5.25	5.66667	6
1829	1	2	2	1	2	3	2	5	2	1	1	6	5	6	7	5	6	5	6	6	5	6	5	6	5	6	5	6	5	6	5	6	5	6	5	6	5	6	5	6	5	6	5	无	6	5.5	5.5	5.66667	5.5
1830	2	3	2	2	4	1	1	3	2	3	3	5	5	5	5	5	5	5	5	5	5	5	5	5	5	6	6	6	6	6	6	6	6	6	6	6	6	6	6	6	6	6	6	无	5	5	5	5	5.5
1831	2	3	3	2	2	1	1	4	1	1	1	4	3	3	4	4	4	4	4	4	4	4	4	4	4	4	4	4	4	4	4	4	4	4	4	4	4	4	4	4	4	4	4	没有	3.5	4	4	3.83333	4
1832	2	3	2	2	4	2	2	2	1	3	1	7	7	7	7	6	6	6	6	6	6	6	6	6	6	6	6	6	6	6	6	6	6	6	6	6	6	6	6	6	6	6	6	无	7	6	6	6.33333	6
1833	2	3	3	2	4	2	1	1	1	1	1	5	4	6	6	4	4	4	4	5	5	5	5	5	5	5	5	7	5	5	3	3	4	3	3	5	5	5	5	5	5	5	5	无	5.25	4	5	4.75	5
1834	1	3	5	2	4	4	3	2	1	2	2	4	3	3	4	4	5	4	5	5	5	4	4	5	4	6	5	4	4	4	4	3	4	5	5	4	4	4	5	5	5	5	5	实践活动增加	3.5	4.5	4.5	4.16667	5
1835	1	3	5	2	2	1	3	5	2	3	2	5	5	5	5	5	5	5	5	5	5	5	5	5	5	5	5	5	5	5	5	5	5	5	5	5	5	5	5	5	5	5	5	无	5	5	5	5	5
1836	1	3	3	2	2	3	3	5	2	3	2	4	4	4	4	4	4	4	4	4	4	4	4	4	4	4	4	4	4	4	4	2	2	2	2	2	2	2	2	2	2	2	2	解决就业问题降低就业门槛	4	4	4	4	4
1837	2	3	3	2	4	1	1	1	2	2	1	4	2	3	5	2	3	3	3	6	6	5	4	4	4	4	4	6	6	5	4	4	5	4	6	4	4	4	4	4	4	4	4	无	3.5	2.75	5.25	3.83333	4
1838	1	3	3	2	1	3	3	4	2	2	2	6	6	6	6	4	4	4	4	5	5	5	5	5	5	5	5	5	5	5	5	5	5	4	5	3	3	3	3	5	5	5	5	无	6	4	5	5	5
1839	1	3	5	2	2	1	1	4	1	2	3	4	4	4	4	4	4	4	4	4	4	4	4	4	4	4	4	4	4	4	4	4	4	4	4	4	4	4	4	4	4	4	4	少安排点课，多留点自主复习的时间	4	4	4	4	4
1840	2	3	2	2	2	1	2	1	2	2	4	3	1	3	4	4	3	4	5	5	6	7	7	4	3	3	4	6	7	7	4	4	6	4	4	4	4	4	4	4	4	5	4	无	2.75	4	6.25	4.33333	3.5
1841	2	3	3	2	4	1	1	1	2	2	3	7	7	4	5	7	6	5	5	5	5	5	5	3	2	3	3	4	4	4	4	3	3	3	3	3	3	3	3	3	3	3	3	无	5.75	5.75	5	5.5	2.75
1842	2	3	5	2	4	1	1	2	2	2	2	6	3	3	4	4	4	4	4	4	4	4	4	4	4	4	4	4	4	4	4	4	4	4	4	4	4	4	4	4	4	4	4	无	4	4	4	4	4
1843	1	1	2	2	4	1	1	2	2	2	2	7	7	7	7	7	7	7	7	7	7	7	7	7	7	7	7	7	7	7	7	7	7	7	7	7	7	7	7	7	7	7	7	无	7	7	7	7	7
1844	2	3	3	2	2	2	2	3	2	3	4	5	5	5	5	5	5	5	5	7	7	6	6	7	7	7	7	6	6	6	6	6	6	6	6	5	6	6	6	6	6	6	6	无	5	5	6.5	5.5	7
1845	2	3	3	2	3	1	1	2	1	3	4	7	7	7	7	7	7	7	7	7	7	7	7	7	7	7	7	7	7	7	7	7	7	7	7	7	7	7	7	7	7	7	7	无	7	7	7	7	7
1846	2	3	3	2	4	1	2	2	2	1	1	7	5	5	5	7	7	7	6	7	7	6	6	6	5	6	6	7	7	7	7	5	7	5	5	7	7	7	7	7	7	7	6	无	5.5	6.75	6.5	6.25	5.75
1847	1	3	3	2	4	1	1	3	2	2	1	7	7	7	7	7	7	7	7	7	7	7	7	7	7	7	7	7	7	7	7	7	7	7	7	7	7	7	7	7	7	7	7	无	7	7	7	7	7
1848	2	3	2	2	4	1	1	2	2	3	1	1	3	3	3	4	4	4	4	4	4	4	4	4	5	4	5	5	4	5	6	6	5	5	4	5	4	4	5	5	3	4	5	无	2.5	4	4	3.5	4.5
1849	1	3	3	2	4	1	1	5	2	1	3	7	7	7	7	7	7	7	7	7	7	7	7	7	7	7	7	7	7	7	7	7	7	7	7	7	7	7	7	7	7	7	7	无	7	7	7	7	7
1850	1	3	3	2	2	2	2	5	2	3	1	4	4	4	4	4	4	4	4	4	4	4	4	4	4	4	4	4	4	4	4	4	4	4	4	4	4	4	4	4	4	4	4	无	4	4	4	4	4
1851	2	3	3	2	2	1	2	1	1	1	1	7	7	7	7	5	5	5	5	7	7	7	7	7	7	7	7	7	7	7	7	7	7	7	7	7	7	7	7	7	7	7	7	无	7	5	7	6.33333	7
1852	2	3	3	2	4	1	1	2	2	1	2	5	5	4	5	6	6	6	6	6	6	6	6	5	4	4	5	6	6	5	4	3	4	3	4	5	5	5	6	5	5	5	5	无	4.75	6	6	5.58333	4.5
1853	2	3	5	2	4	1	1	1	2	2	1	5	4	4	4	5	5	4	5	5	4	5	3	4	5	4	5	4	5	5	4	4	5	4	5	4	4	5	5	5	4	4	5	无	4.25	4.75	4.25	4.41667	4.5
1854	1	3	5	2	4	1	1	4	2	2	2	5	5	5	5	5	5	5	5	5	5	5	5	5	5	5	5	5	5	5	5	5	5	5	5	5	5	5	5	5	5	5	5	无	5	5	5	5	5
1855	2	3	5	2	3	3	2	1	2	3	4	4	4	4	4	4	4	4	4	4	4	4	4	4	4	4	4	4	4	4	4	4	4	4	4	4	4	4	4	4	4	4	4	无	4	4	4	4	4
1856	1	3	5	2	4	1	1	3	2	3	1	7	7	7	7	7	7	7	7	7	7	7	7	7	7	7	7	7	7	7	7	7	7	7	7	7	7	7	7	7	7	7	7	无	7	7	7	7	7
1857	2	3	2	2	4	1	1	3	2	3	3	5	4	5	5	6	5	6	5	6	5	5	5	5	5	5	5	5	5	5	5	5	5	5	5	5	5	5	5	5	5	5	5	无	4.75	5.5	5.25	5.16667	5
1858	2	3	2	2	3	2	1	4	2	2	1	5	5	5	4	4	3	5	3	4	4	3	3	4	3	5	3	5	3	5	3	3	5	5	3	5	5	3	3	5	5	3	5	无	4.75	3.75	3.5	4	3.75
1859	1	3	5	2	4	2	1	4	2	1	3	7	7	7	7	5	5	5	5	5	5	5	5	5	5	5	5	5	5	5	5	5	5	5	5	5	5	5	5	5	5	5	5	好	7	5	5	5.66667	5
1860	2	3	2	2	4	2	1	3	1	2	1	5	5	5	5	5	5	5	5	5	5	5	5	5	5	5	5	5	5	5	5	5	5	5	5	5	5	5	5	5	5	5	5	无	5	5	5	5	5
1861	2	3	2	2	4	1	1	2	1	2	3	4	4	4	4	4	4	4	4	4	4	4	4	4	4	4	4	4	4	3	3	4	4	4	4	4	4	4	4	4	4	4	4	无	4	4	4	4	4
1862	1	3	2	2	4	2	2	4	2	2	2	3	3	3	3	3	3	3	3	3	2	3	3	3	3	3	3	3	3	3	3	3	3	3	3	2	3	2	3	2	3	2	3	🖐🏻	3	3	2.75	2.91667	3
1863	2	3	3	2	2	2	2	2	2	1	3	5	5	5	5	6	5	5	5	5	5	5	5	5	5	5	5	5	5	5	5	5	5	5	5	5	5	5	5	5	5	5	5	无	5	5.25	5	5.08333	5
1864	2	3	2	2	4	1	1	1	2	1	1	5	4	3	4	3	2	2	2	3	3	2	3	3	3	3	3	6	4	4	3	3	4	3	3	3	3	3	3	4	4	3	3	不注重实践	4	2.25	2.75	3	3
1865	2	3	2	2	2	2	2	4	2	2	1	4	4	4	4	4	4	4	4	4	4	4	4	4	4	4	4	4	4	4	4	4	4	4	4	4	4	4	4	4	4	4	4	无	4	4	4	4	4
1866	2	3	3	2	4	3	1	1	1	2	3	5	5	4	4	5	5	4	4	4	4	5	4	4	4	5	4	4	4	4	5	4	5	3	5	4	3	4	4	5	5	4	4	无	4.5	4.5	4.25	4.41667	4.25
1867	2	3	5	2	2	1	1	3	2	2	3	4	4	4	4	4	4	4	4	4	4	4	4	4	4	4	4	4	4	4	4	4	4	4	4	4	4	4	4	4	4	4	4	无	4	4	4	4	4
1868	2	2	3	2	4	1	1	3	2	2	1	4	4	4	4	4	4	4	4	4	4	4	4	4	4	4	4	4	4	4	4	4	4	4	4	4	4	4	4	4	4	4	4	无	4	4	4	4	4
1869	2	3	3	2	1	3	3	1	2	2	1	3	3	3	3	3	3	3	3	3	3	3	3	3	3	3	3	3	3	3	3	3	3	3	3	3	3	3	3	3	3	3	3	无	3	3	3	3	3
1870	2	3	2	2	4	1	1	1	2	3	3	6	4	3	5	4	4	6	4	7	6	3	5	3	3	3	5	5	6	6	3	1	7	1	4	3	3	3	5	5	5	5	5	不要再弄一些小组作业了	4.5	4.5	5.25	4.75	3.5
1871	1	1	1	1	1	3	3	2	2	1	2	7	7	7	7	7	7	7	7	7	7	7	7	7	7	7	7	7	7	7	7	7	7	7	7	7	7	7	7	7	7	7	7	.	7	7	7	7	7
1872	1	3	2	2	2	2	2	4	2	1	1	7	7	7	7	7	7	7	7	7	7	7	7	7	7	7	7	7	7	7	7	7	7	7	7	7	7	7	7	7	7	7	7	无	7	7	7	7	7
1873	2	3	3	2	4	1	1	1	2	2	4	5	5	5	5	5	5	5	5	5	5	5	5	5	5	6	5	5	5	5	5	5	5	5	5	5	5	5	5	5	5	5	5	无	5	5	5	5	5.25
1874	2	3	3	2	4	1	1	1	2	1	4	7	7	7	7	7	7	7	7	7	7	7	7	7	7	7	7	7	7	7	7	7	7	7	7	7	7	7	7	7	7	7	7	无	7	7	7	7	7
1875	2	3	3	2	4	3	1	1	1	2	1	7	7	7	7	7	7	7	7	7	7	7	7	7	7	7	7	7	7	7	7	7	7	7	7	6	6	6	5	5	5	5	5	无	7	7	7	7	7
1876	1	3	3	2	2	3	2	4	2	1	1	6	6	6	6	6	6	6	6	6	6	6	6	6	6	6	6	6	6	6	6	6	6	6	6	6	6	6	6	6	6	6	6	无	6	6	6	6	6
1877	2	3	2	2	2	1	1	3	2	1	2	3	3	3	3	3	3	3	3	3	3	3	3	3	3	3	3	3	3	3	3	3	3	3	3	3	3	3	3	3	3	3	3	无	3	3	3	3	3
1878	1	3	3	2	4	1	1	4	2	3	2	4	4	4	4	4	4	4	4	4	4	4	4	4	4	4	4	4	4	4	4	4	4	4	4	4	4	4	4	4	4	4	4	无	4	4	4	4	4
1879	2	3	2	2	4	1	1	3	2	1	1	4	6	4	5	4	4	4	4	4	4	4	4	4	4	4	4	4	4	4	4	4	4	4	4	4	4	4	4	4	4	4	4	无	4.75	4	4	4.25	4
1880	2	3	3	2	2	3	3	1	1	1	1	7	7	7	7	7	7	7	7	7	7	7	7	7	7	7	7	7	7	7	7	7	7	7	7	7	7	7	7	7	7	7	7	无	7	7	7	7	7
1881	1	3	3	2	4	1	1	1	1	1	1	7	7	7	7	7	6	7	7	7	7	7	7	7	7	7	7	6	7	6	6	7	6	7	7	7	6	7	7	7	6	7	7	wu	7	6.75	7	6.91667	7
1882	2	3	2	2	4	2	2	2	1	1	1	7	7	7	7	7	7	7	7	7	7	7	7	7	7	7	7	7	7	7	7	7	7	7	7	7	7	7	7	7	7	7	7	。	7	7	7	7	7
1883	2	3	3	2	4	1	1	1	2	3	2	5	3	3	5	4	4	5	4	6	5	6	6	5	4	4	5	4	5	3	3	3	4	4	4	4	5	4	6	4	4	5	4	无	4	4.25	5.75	4.66667	4.5
1884	1	3	3	2	2	3	3	4	2	3	3	3	3	3	3	3	3	3	3	3	3	3	3	3	3	3	3	3	3	3	3	3	3	3	3	3	3	3	3	3	3	3	3	无	3	3	3	3	3
1885	1	3	3	2	3	2	2	2	1	2	3	7	7	6	7	5	7	7	7	7	7	6	7	6	6	6	5	7	6	6	7	7	6	7	7	5	6	6	6	5	6	7	7	暂无	6.75	6.5	6.75	6.66667	5.75
1886	1	3	3	2	4	1	1	5	1	2	3	5	5	5	5	6	6	6	6	5	4	3	4	2	2	3	2	2	4	3	3	4	5	3	7	5	7	7	7	3	4	4	3	无	5	6	4	5	2.25
1887	1	3	3	2	4	1	1	3	2	2	1	3	4	3	3	4	3	3	3	3	3	4	4	3	4	3	4	4	3	4	4	4	3	4	4	4	4	4	3	4	4	4	3	无	3.25	3.25	3.5	3.33333	3.5
1888	2	3	3	2	1	3	3	2	2	2	1	5	5	5	5	5	5	5	5	5	5	5	5	5	5	5	5	5	4	4	4	4	4	4	5	5	4	4	5	5	4	5	4	无	5	5	5	5	5
1889	2	3	3	2	4	1	1	1	2	2	1	4	5	4	5	3	5	4	4	5	4	5	4	5	6	5	4	6	5	4	4	5	4	5	4	6	4	5	4	5	4	4	5	无	4.5	4	4.5	4.33333	5
1890	2	3	3	2	1	3	2	2	2	2	4	4	4	4	4	4	4	4	4	4	4	4	4	4	4	4	4	4	4	4	4	4	4	4	4	4	4	4	4	4	4	4	4	无	4	4	4	4	4
1891	2	3	5	1	4	1	1	4	2	2	1	7	7	7	7	7	7	7	7	7	7	7	7	7	7	7	7	7	7	7	7	7	7	7	7	7	7	7	7	7	7	7	7	无	7	7	7	7	7
1892	2	3	3	2	4	1	1	2	2	1	4	2	2	2	4	3	2	3	2	2	3	2	2	3	3	3	3	3	3	3	3	3	3	3	3	3	3	3	3	3	3	3	3	无	2.5	2.5	2.25	2.41667	3
1893	2	3	2	2	2	2	2	3	2	2	3	4	4	4	4	4	4	4	4	5	6	6	6	5	5	5	5	7	6	5	5	4	6	7	6	6	7	7	7	5	4	5	4	无	4	4	5.75	4.58333	5
1894	2	3	3	2	4	1	1	2	1	1	1	5	2	4	5	5	4	5	5	4	5	4	4	5	4	5	4	5	4	4	3	3	4	4	4	4	4	4	4	4	5	4	3	无	4	4.75	4.25	4.33333	4.5
1895	1	3	3	2	2	1	2	4	2	1	1	7	7	7	7	7	7	7	7	7	7	7	7	7	7	7	7	7	7	7	7	7	7	7	7	7	7	7	7	7	7	7	7	无	7	7	7	7	7
1896	1	3	3	2	4	1	2	3	2	3	3	5	5	5	5	5	5	5	5	5	5	5	5	5	5	5	5	5	5	5	5	5	5	5	5	5	5	5	5	5	5	5	5	无	5	5	5	5	5
1897	1	3	3	2	2	3	3	1	1	1	3	7	7	7	7	7	7	7	7	7	7	7	7	6	6	6	6	6	6	6	6	6	6	6	6	7	7	6	7	7	7	7	4	无	7	7	7	7	6
1898	1	1	5	2	2	2	2	3	1	1	1	4	4	6	6	5	4	6	5	4	5	5	5	4	6	5	5	5	5	5	4	3	4	4	4	5	5	7	6	5	6	6	4	多设置一些与时俱进的课程	5	5	4.75	4.91667	5
1899	2	3	3	2	4	1	1	1	2	3	3	4	4	4	4	4	4	4	4	4	5	5	5	5	4	5	5	5	5	6	6	5	6	6	5	4	5	6	6	4	5	5	5	无	4	4	4.75	4.25	4.75
1900	1	3	3	2	2	1	1	4	2	1	1	7	7	7	7	7	7	7	7	7	7	7	7	7	7	7	7	7	7	7	7	7	6	6	6	7	7	7	6	7	7	7	6	无	7	7	7	7	7
1901	1	3	3	2	2	2	1	3	2	2	1	7	7	7	7	7	7	7	7	7	7	7	7	7	7	7	7	7	7	7	7	7	7	7	7	7	7	7	7	7	7	7	7	无	7	7	7	7	7
1902	2	1	5	2	1	3	3	4	2	3	4	2	2	2	5	7	7	7	7	5	5	5	5	5	5	5	5	4	4	4	4	6	6	3	6	5	6	6	6	3	2	2	2	没有啥不足	2.75	7	5	4.91667	5
1903	1	3	3	2	4	1	1	5	2	3	1	4	3	6	7	6	6	7	5	6	6	7	6	5	5	3	6	6	6	4	3	2	6	2	4	4	4	4	4	4	2	5	3	有些脱离实践	5	6	6.25	5.75	4.75
1904	2	1	3	2	2	3	3	5	2	2	4	1	1	1	7	5	1	7	4	7	7	4	1	4	2	2	2	6	4	3	2	1	1	1	1	1	2	2	2	3	2	2	2	无	2.5	4.25	4.75	3.83333	2.5
1905	1	3	3	2	4	1	1	2	2	2	1	5	5	5	5	5	5	5	5	5	5	5	5	5	5	5	5	5	5	5	5	5	5	5	5	5	5	5	5	5	5	5	5	无	5	5	5	5	5
1906	1	3	3	2	4	1	1	3	2	2	1	5	4	5	5	4	3	3	4	5	5	5	5	5	5	5	5	5	5	6	4	3	4	2	2	5	5	5	5	5	6	6	6	无	4.75	3.5	5	4.41667	5
1907	1	3	3	2	2	2	2	2	1	2	3	7	7	7	7	7	7	7	7	7	7	7	7	7	7	7	7	7	7	7	7	7	7	7	7	7	7	7	7	7	7	7	7	无	7	7	7	7	7
1908	2	3	3	2	4	1	1	2	1	2	1	4	4	4	4	4	4	4	4	4	4	4	4	4	4	4	4	4	4	4	4	4	4	4	4	4	4	4	4	4	4	4	4	。	4	4	4	4	4
1909	2	3	3	2	4	2	2	2	2	1	1	5	5	5	5	5	5	5	5	4	4	5	5	5	5	5	5	5	5	5	5	4	5	4	4	5	5	5	5	5	5	5	5	无	5	5	4.5	4.83333	5
1910	2	3	3	2	2	2	2	5	2	2	2	4	4	4	4	4	4	4	4	4	4	4	4	4	4	4	4	4	4	4	4	4	4	4	4	4	4	4	4	4	4	4	4	无	4	4	4	4	4
1911	2	3	3	2	4	1	1	1	2	1	3	4	2	3	5	5	4	5	6	6	4	4	6	4	5	4	3	6	7	1	2	1	4	3	4	4	4	4	4	5	5	5	6	无	3.5	5	5	4.5	4
1912	2	3	3	2	2	1	2	1	2	2	1	5	3	3	5	4	4	4	4	3	4	4	4	3	4	3	4	4	3	3	3	2	3	2	3	3	2	2	2	3	3	3	3	无	4	4	3.75	3.91667	3.5
1913	2	3	3	2	4	2	1	3	2	2	3	7	7	6	6	5	5	5	5	6	6	6	6	6	6	6	6	6	6	6	6	5	6	5	7	5	4	4	4	6	6	6	6	worenwe	6.5	5	6	5.83333	6
1914	2	3	1	2	4	4	2	1	1	1	1	7	7	7	7	7	6	5	4	2	3	4	5	5	5	5	5	5	6	4	7	7	1	7	1	5	3	5	3	7	7	7	7	无	7	5.5	3.5	5.33333	5
1915	2	3	2	2	4	1	1	1	1	2	1	7	3	4	6	5	6	6	4	7	7	4	4	6	6	6	6	7	7	7	6	4	4	4	4	7	7	7	7	6	6	6	6	无	5	5.25	5.5	5.25	6
1916	1	3	2	2	2	3	2	5	1	3	1	2	2	2	2	2	2	2	2	2	2	2	2	2	2	2	2	2	2	2	2	2	2	2	2	2	2	2	2	2	2	2	2	无	2	2	2	2	2
1917	2	3	3	2	3	1	1	1	2	2	1	6	5	4	6	6	6	5	5	5	5	5	4	5	5	5	5	5	4	5	5	5	4	4	4	6	6	6	6	6	6	6	4	无	5.25	5.5	4.75	5.16667	5
1918	2	3	2	2	2	1	1	1	1	2	2	6	5	4	5	6	6	6	6	6	6	3	4	6	6	6	4	6	6	6	3	2	2	2	2	4	4	3	5	4	4	4	3	无	5	6	4.75	5.25	5.5
1919	2	3	2	2	3	3	1	3	2	3	1	4	4	4	3	1	1	1	4	5	5	5	5	3	2	2	4	6	7	6	4	2	2	2	4	2	1	1	3	4	4	4	4	少让学生做ppt上台去讲 一点用也没有	3.75	1.75	5	3.5	2.75
1920	2	3	3	2	4	1	1	1	2	2	3	4	4	3	4	4	4	4	4	3	4	5	4	4	4	4	4	4	4	4	4	4	4	5	5	4	4	4	4	4	4	4	4	无	3.75	4	4	3.91667	4
1921	2	3	3	2	4	1	1	2	2	2	1	7	7	7	7	7	7	7	7	7	7	7	7	7	7	7	7	7	7	7	7	7	7	7	7	7	7	7	7	7	7	7	7	无	7	7	7	7	7
1922	1	3	3	2	3	1	1	2	1	2	4	4	4	4	4	4	4	4	4	4	4	4	4	4	4	4	4	4	4	4	4	4	4	4	4	4	4	4	4	4	4	4	4	无	4	4	4	4	4
1923	1	3	3	2	4	1	1	1	2	2	1	5	6	5	5	5	5	5	5	5	5	5	5	5	5	5	5	5	5	5	5	5	5	5	5	5	5	5	5	5	5	5	5	面试建议	5.25	5	5	5.08333	5
1924	2	3	5	2	4	1	1	3	2	2	3	4	4	4	4	4	4	4	4	4	4	4	4	4	4	4	4	4	4	4	4	4	4	4	4	4	4	4	4	4	4	4	4	无	4	4	4	4	4
1925	2	3	2	2	2	1	1	3	2	1	3	4	4	4	4	4	4	4	4	4	4	4	4	4	4	4	4	4	4	4	4	4	4	4	4	4	4	4	4	4	4	4	4	无	4	4	4	4	4
1926	2	3	3	2	1	1	1	3	2	1	3	4	3	2	5	3	4	4	4	4	4	3	4	4	5	4	4	6	3	3	3	2	5	2	3	3	4	3	5	3	2	4	2	无	3.5	3.75	3.75	3.66667	4.25
1927	2	3	3	2	2	2	2	1	2	2	1	7	5	5	6	5	5	7	6	7	7	7	7	5	4	4	5	5	7	5	4	4	7	5	5	5	4	6	7	5	5	7	5	无	5.75	5.75	7	6.16667	4.5
1928	1	3	3	2	1	3	3	1	1	1	1	6	6	6	6	6	6	6	6	6	6	6	6	6	6	6	6	6	6	6	6	6	6	6	6	6	6	6	6	6	6	6	6	无	6	6	6	6	6
1929	2	3	3	2	1	3	2	2	2	1	1	5	5	5	5	5	5	5	5	5	5	5	5	5	5	5	5	5	5	5	5	5	5	5	5	5	5	5	5	5	5	5	5	无	5	5	5	5	5
1931	2	3	3	2	4	1	1	2	2	1	1	7	7	6	7	4	4	6	5	7	7	7	7	7	7	7	7	7	7	7	7	2	2	2	2	5	5	5	5	6	5	6	6	无	6.75	4.75	7	6.16667	7
1932	2	4	5	2	4	2	1	2	2	3	4	4	4	4	4	4	4	4	4	4	4	4	4	4	4	4	4	4	4	4	4	4	4	4	4	4	4	4	4	4	4	4	4	无	4	4	4	4	4
1933	1	1	3	1	1	2	3	3	1	2	1	3	1	4	7	4	1	7	4	1	4	1	4	4	4	4	4	7	3	3	3	3	3	1	2	3	7	4	7	3	3	4	4	无	3.75	4	2.5	3.41667	4
1934	2	1	5	2	2	2	2	1	1	1	1	6	6	6	6	5	5	5	5	5	5	5	5	5	5	5	5	5	5	5	5	5	5	5	5	5	5	5	5	5	5	5	5	无	6	5	5	5.33333	5
1935	1	2	2	1	2	1	2	4	2	3	1	3	3	3	3	3	3	3	3	3	3	3	3	3	3	3	3	3	3	3	3	3	3	3	3	3	3	3	3	3	3	3	3	无	3	3	3	3	3
1936	2	3	3	2	2	2	2	1	1	2	3	4	4	4	4	4	4	4	4	4	4	4	4	4	4	4	4	4	4	4	4	4	4	4	4	4	4	4	4	4	4	4	4	无	4	4	4	4	4
1937	2	3	3	1	4	2	2	1	1	1	1	7	7	7	7	7	7	7	7	7	7	7	7	7	7	7	7	7	7	7	7	7	7	7	7	7	7	7	7	7	7	7	7	无	7	7	7	7	7
1938	2	3	3	2	1	3	2	2	1	2	1	6	5	6	6	6	6	6	6	6	6	6	6	6	6	6	6	6	6	6	6	6	6	7	6	6	7	6	6	6	7	7	7	无	5.75	6	6	5.91667	6
1939	1	1	1	2	4	1	1	1	1	1	1	7	7	7	7	7	7	7	7	7	7	7	7	7	7	7	7	7	7	7	7	7	7	7	7	7	7	7	7	7	7	7	7	哈哈	7	7	7	7	7
1940	2	1	2	2	4	1	1	1	2	3	1	6	4	3	6	2	3	6	4	5	5	5	5	4	5	5	4	6	6	6	6	4	5	4	5	5	5	4	6	6	5	5	5	无	4.75	3.75	5	4.5	4.5
1941	2	3	3	2	1	3	3	1	2	1	4	6	2	5	7	4	6	6	6	7	6	7	7	7	6	7	6	7	7	5	5	6	6	6	4	6	6	6	7	6	7	7	7	我觉得政治与公共管理学院在设置公共事业管理的专业课程时非常的合理，在考研备考时我深切地感受到了，课程设置由浅入深，十分适合考研学习的知识储备与专业素养。但是公共管理研究方法这门课系统学习了stata的运用，但是stata熟练运用的前提是掌握统计学相关知识，23级公共事业管理专业未学过统计学我觉得略有遗憾，不过我已经自学弥补了这一缺失。	5	5.5	6.75	5.75	6.5
1942	1	1	3	2	2	1	1	3	1	1	1	5	6	5	5	5	5	6	6	4	6	5	6	6	4	5	7	6	7	5	6	5	6	6	5	5	6	7	7	7	5	5	5	wu	5.25	5.5	5.25	5.33333	5.5
1943	1	2	3	2	2	3	2	4	1	1	1	7	7	7	7	7	7	7	7	7	7	7	7	7	7	7	7	7	7	7	7	7	7	7	7	7	7	7	7	7	7	7	7	无	7	7	7	7	7
1944	2	3	2	2	2	2	1	4	2	3	4	4	4	4	4	4	4	4	4	4	4	4	4	4	4	4	4	4	4	4	4	4	4	4	4	4	4	4	4	4	4	4	4	无	4	4	4	4	4
1945	2	3	2	2	3	1	1	1	1	2	1	6	5	4	5	5	6	6	6	6	6	6	5	4	4	4	4	5	5	5	6	5	5	5	5	5	5	5	5	5	5	5	5	无	5	5.75	5.75	5.5	4
1946	2	1	3	2	2	1	1	4	2	2	2	4	4	4	4	4	4	4	4	4	4	4	4	4	4	4	4	4	4	4	4	4	4	4	4	4	4	4	4	4	4	4	4	非常好	4	4	4	4	4
1947	2	1	3	2	4	1	1	1	2	2	1	6	6	6	6	6	4	5	4	6	6	3	3	5	6	4	5	5	4	6	6	5	3	5	6	6	6	7	6	5	6	5	5	无	6	4.75	4.5	5.08333	5
1948	2	1	3	2	2	3	3	4	1	1	4	1	1	1	1	3	2	2	2	4	4	2	3	3	2	3	2	3	2	3	2	3	3	2	3	3	3	4	4	4	4	4	4	无	1	2.25	3.25	2.16667	2.5
1949	2	3	3	2	3	3	3	3	1	2	1	7	7	7	7	7	7	7	4	7	7	7	7	7	7	7	7	6	6	7	7	6	6	5	6	6	6	6	6	6	6	7	6	无	7	6.25	7	6.75	7
1950	2	3	2	2	4	1	1	3	2	2	1	6	6	6	6	5	5	5	5	5	5	5	5	5	5	5	5	5	5	5	5	5	5	5	5	5	5	5	5	5	5	5	5	无	6	5	5	5.33333	5
1951	2	3	2	2	4	1	1	2	2	3	1	4	4	4	4	4	4	4	4	4	4	4	4	4	4	4	4	4	4	4	4	4	4	4	4	4	4	4	4	4	4	4	4	无	4	4	4	4	4
1952	2	3	2	2	4	3	1	4	2	2	3	4	4	3	4	4	4	4	4	4	4	4	4	4	4	4	4	4	4	4	4	4	4	4	4	4	4	4	4	4	4	4	4	无	3.75	4	4	3.91667	4
1953	2	3	3	2	2	1	1	3	2	1	1	7	7	7	7	7	7	7	7	7	7	7	7	7	7	7	7	7	7	7	7	7	7	7	7	7	7	7	7	7	7	7	7	无	7	7	7	7	7
1954	2	1	3	2	2	2	2	1	1	2	4	7	4	4	7	4	3	5	4	4	5	4	5	4	5	5	4	4	5	4	5	4	5	4	5	4	4	4	4	4	5	4	4	无	5.5	4	4.5	4.66667	4.5
1955	2	1	5	2	3	2	2	2	2	1	1	4	4	4	4	4	4	4	4	4	4	4	4	4	4	4	4	4	4	4	4	4	4	4	4	4	4	4	4	4	4	4	4	无	4	4	4	4	4
1956	2	1	3	2	2	3	3	4	1	2	1	6	6	6	6	6	6	6	6	6	6	6	6	6	6	6	6	6	6	6	6	6	6	6	6	6	6	6	6	6	6	6	6	无	6	6	6	6	6
1957	2	1	3	2	1	3	3	2	1	1	1	2	3	3	3	3	3	3	3	3	3	3	3	3	3	3	3	3	3	3	3	3	3	3	3	3	3	3	3	3	3	3	3	无	2.75	3	3	2.91667	3
1958	1	1	3	2	2	3	3	1	2	1	4	6	5	6	6	5	5	5	5	4	5	5	4	5	4	5	4	5	4	5	4	4	3	5	3	5	3	5	3	5	3	5	5	可以帮助了解专业知识	5.75	5	4.5	5.08333	4.5
1959	2	3	3	2	4	1	1	5	2	3	1	4	4	4	4	4	4	4	4	4	4	4	4	4	4	4	4	4	4	4	4	4	4	4	4	4	4	3	3	3	5	3	4	无	4	4	4	4	4
1960	2	3	3	2	3	1	1	4	2	2	1	5	5	3	4	4	4	4	4	3	4	4	4	3	4	4	5	5	5	4	3	4	3	4	4	4	4	3	3	3	4	4	4	无	4.25	4	3.75	4	4
1961	2	1	3	2	2	1	2	3	2	1	4	7	7	7	7	7	7	7	7	7	7	7	7	7	7	7	7	7	7	7	7	7	7	7	7	7	7	7	7	7	7	7	7	提供实习单位	7	7	7	7	7
1962	2	1	3	2	2	3	3	2	1	2	4	4	3	5	5	5	5	5	4	4	4	4	4	4	4	4	4	5	5	4	4	4	5	5	4	7	7	7	7	7	7	7	7	无	4.25	4.75	4	4.33333	4
1963	2	3	2	2	2	1	1	3	2	1	1	3	3	3	3	3	3	3	3	3	3	3	3	3	3	3	3	3	3	3	3	3	3	3	3	3	3	3	3	3	3	3	3	职业规划	3	3	3	3	3
1964	2	3	3	2	4	3	1	2	2	2	1	5	5	5	5	5	5	5	5	4	4	4	4	4	4	4	4	4	4	4	4	4	4	4	4	4	4	4	4	4	4	4	4	无	5	5	4	4.66667	4
1965	1	3	3	2	2	1	1	2	1	2	4	4	4	4	4	4	4	4	4	4	4	4	4	4	4	4	4	4	4	4	4	4	4	4	4	4	4	4	4	4	4	4	4	无	4	4	4	4	4
1966	2	3	3	2	2	2	2	2	2	3	3	4	5	4	5	4	4	5	5	5	5	6	4	4	4	4	5	6	5	4	4	3	5	3	4	5	5	5	5	5	5	5	5	无	4.5	4.5	5	4.66667	4.25
1967	1	3	3	2	2	2	2	5	2	1	3	7	7	7	7	7	7	7	7	7	7	7	7	7	7	7	7	7	7	7	7	7	7	7	7	7	7	7	7	7	7	7	7	无	7	7	7	7	7
1968	1	3	3	2	4	2	2	5	2	2	1	7	7	7	7	7	7	7	7	7	7	7	7	7	7	7	7	7	7	7	7	7	7	7	7	7	7	7	7	7	7	7	7	无	7	7	7	7	7
1970	2	3	2	2	4	2	2	1	2	1	1	4	4	4	4	4	4	4	4	4	4	4	4	4	4	4	4	4	4	4	4	4	4	4	4	4	4	4	4	4	4	4	4	无	4	4	4	4	4
1972	1	3	3	2	3	3	1	4	1	1	3	7	4	7	7	7	7	7	7	7	7	7	7	7	7	7	7	7	7	7	7	7	7	7	7	7	7	7	7	7	7	7	7	无	6.25	7	7	6.75	7
1973	2	3	5	2	4	1	1	3	2	2	1	3	2	2	6	2	2	2	6	2	6	2	2	2	2	2	2	6	3	3	3	3	3	3	3	3	3	3	6	3	3	3	3	无	3.25	3	3	3.08333	2
1974	2	1	3	2	4	1	1	3	1	1	1	7	4	6	7	6	6	6	6	7	6	6	6	5	5	5	6	6	4	5	4	3	5	5	5	5	4	4	5	5	5	5	4	学校或专业与更多企业建立合作关系，为学生提供更多的实习岗位。安排学生在合适的学期进入企业实习	6	6	6.25	6.08333	5.25
1975	1	3	1	2	3	3	1	1	2	1	1	4	4	4	4	4	4	4	4	4	4	4	4	4	4	4	4	4	4	4	4	4	4	4	4	4	4	4	4	4	4	4	4	五	4	4	4	4	4
1976	2	3	3	2	2	2	1	1	2	2	1	5	5	5	5	5	5	5	5	5	5	5	5	5	5	5	5	5	5	5	5	5	5	5	5	5	5	5	5	5	5	5	5	su无	5	5	5	5	5
1977	1	3	2	2	4	1	1	5	2	1	4	4	3	6	5	5	5	4	5	4	6	5	4	4	4	3	5	5	6	5	3	3	5	3	4	4	3	3	6	4	4	5	4	无	4.5	4.75	4.75	4.66667	4
1978	1	1	3	2	4	1	1	2	1	1	4	4	4	4	4	4	4	4	4	4	4	4	4	4	4	4	4	4	4	4	4	4	4	4	4	4	4	4	4	4	4	4	4	无	4	4	4	4	4
1979	1	3	3	2	4	1	1	1	2	1	1	5	5	5	5	5	5	5	5	5	5	5	5	5	5	5	5	5	5	5	5	5	5	5	5	5	5	5	5	5	5	5	5	无	5	5	5	5	5
1980	2	3	5	2	2	2	2	1	1	1	3	7	7	7	7	7	7	7	7	7	7	7	7	7	7	7	7	7	7	7	7	7	7	7	7	7	7	7	7	7	7	7	7	无	7	7	7	7	7
1981	1	1	3	2	2	2	2	3	2	3	4	4	4	4	4	4	4	4	4	4	4	4	4	4	4	4	4	4	4	4	4	4	4	4	4	4	4	4	4	4	4	4	4	?	4	4	4	4	4
1982	2	3	3	2	4	1	1	1	1	1	3	7	7	7	7	7	7	7	7	7	7	7	7	7	7	7	7	7	7	7	7	7	7	7	7	7	7	7	7	7	7	7	7	社会调查	7	7	7	7	7
1983	2	3	2	2	4	1	1	2	2	3	4	6	6	6	6	6	6	6	6	6	6	6	6	6	6	6	6	6	6	6	6	6	6	6	6	5	5	5	5	5	5	5	5	无	6	6	6	6	6
1984	2	3	2	2	3	2	1	3	2	2	1	3	3	3	3	3	3	3	3	3	3	3	3	3	3	3	3	3	3	3	3	3	3	3	3	3	3	3	3	3	3	3	3	无	3	3	3	3	3
1985	2	1	3	2	4	1	1	5	2	2	1	2	2	2	2	2	2	2	2	2	2	2	2	2	2	2	2	2	2	3	3	3	3	2	2	2	2	2	2	2	2	2	2	无	2	2	2	2	2
1986	2	3	2	2	4	1	1	1	2	1	4	2	1	2	2	4	3	3	3	3	3	3	3	3	3	3	3	3	3	3	3	3	3	3	3	3	3	3	3	3	3	3	3	无	1.75	3.25	3	2.66667	3
1987	1	3	2	2	1	2	2	2	1	1	3	7	7	7	7	7	7	7	7	7	7	7	7	7	7	7	7	7	7	7	7	7	7	7	7	7	7	7	7	7	7	7	7	无	7	7	7	7	7
1988	2	1	3	2	1	3	3	5	1	3	4	1	1	1	7	1	1	1	1	1	1	1	1	7	7	7	7	7	7	7	7	7	7	7	7	6	6	4	4	7	7	7	5	无	2.5	1	1	1.5	7
1989	2	1	3	2	2	1	1	4	2	1	1	7	7	7	7	7	7	7	7	7	7	7	7	7	7	7	7	7	7	7	7	7	7	7	7	7	7	7	7	7	7	7	7	无	7	7	7	7	7
1990	2	1	2	2	2	3	2	1	1	1	4	4	5	4	5	5	3	4	4	5	4	5	3	4	5	4	5	4	4	5	4	4	5	4	5	4	5	4	5	5	4	5	4	无	4.5	4	4.25	4.25	4.5
1991	2	4	5	1	4	1	1	2	2	1	3	4	4	4	5	3	3	3	3	3	3	3	3	4	4	3	3	4	3	4	4	3	3	3	3	3	3	3	3	4	3	3	4	给同学们多谋点出路，，提供更好的工作机会，提供考研考公等指导	4.25	3	3	3.41667	3.5
1992	2	1	3	2	4	1	1	5	2	2	4	7	7	7	7	7	7	5	6	6	7	7	7	7	7	7	7	6	7	7	7	7	7	7	7	7	7	7	7	7	7	7	7	没有什么建议	7	6.25	6.75	6.66667	7
1993	2	1	3	2	4	3	2	2	2	2	4	1	1	5	5	4	4	7	4	2	5	2	5	2	2	2	3	5	2	4	1	1	4	3	4	4	2	2	3	2	2	2	2	无	3	4.75	3.5	3.75	2.25
1994	2	3	3	2	4	1	1	2	2	3	4	4	4	4	4	4	4	4	4	4	4	4	4	4	4	4	4	4	4	4	4	4	4	4	4	4	4	4	4	4	4	4	4	无	4	4	4	4	4
1995	1	3	3	2	2	3	3	3	1	1	2	4	4	5	4	6	6	6	6	7	6	6	6	6	6	6	6	6	6	6	6	6	6	6	6	6	6	6	6	6	6	6	6	无	4.25	6	6.25	5.5	6
1996	2	1	5	2	4	2	2	4	2	2	1	4	4	4	4	4	4	4	4	4	4	4	4	4	4	4	4	4	4	4	4	4	4	4	4	4	4	4	4	4	4	4	4	无	4	4	4	4	4
1997	2	3	5	2	2	3	3	3	1	2	1	4	3	4	5	4	4	4	4	4	4	4	4	4	4	4	4	4	4	4	4	4	4	4	4	4	4	4	4	4	4	4	4	无	4	4	4	4	4
1998	2	3	2	2	4	1	1	2	2	2	3	5	3	3	3	3	3	3	4	6	6	5	5	4	4	4	3	4	5	4	2	2	2	2	2	5	4	4	6	5	4	4	2	无	3.5	3.25	5.5	4.08333	3.75
1999	2	4	2	2	2	3	3	3	2	2	1	4	4	4	4	4	4	4	4	5	5	5	5	4	4	4	4	4	4	4	4	4	4	4	4	4	4	4	4	4	4	4	4	无	4	4	5	4.33333	4
2000	2	1	3	2	2	2	3	3	1	2	4	6	5	4	6	5	5	4	6	5	7	5	4	6	5	6	6	6	6	5	4	4	5	5	5	5	5	6	6	7	7	6	7	无	5.25	5	5.25	5.16667	5.75
2001	1	3	3	2	4	1	1	1	2	1	3	4	5	4	5	4	4	4	4	4	4	4	4	4	4	4	4	4	4	4	4	4	4	4	4	4	4	4	4	4	4	4	4	无	4.5	4	4	4.16667	4
2002	1	3	5	2	3	2	1	2	1	3	2	4	4	4	4	1	1	1	4	4	4	4	4	4	4	4	4	4	4	4	4	4	4	4	4	4	4	4	4	4	4	4	4	无	4	1.75	4	3.25	4
2003	1	3	3	2	2	3	2	3	1	2	1	4	4	4	4	4	4	4	4	4	4	4	4	4	4	4	4	4	4	4	4	4	4	4	4	4	4	4	4	4	4	4	4	无	4	4	4	4	4
2004	2	1	3	2	2	2	2	3	1	2	4	5	3	4	5	5	4	5	5	4	4	3	4	4	4	4	4	4	4	4	4	4	4	4	4	4	4	4	4	4	4	4	4	无	4.25	4.75	3.75	4.25	4
2005	1	3	3	2	1	3	4	5	2	1	1	7	7	7	7	7	7	7	7	7	7	7	7	7	7	7	7	7	7	7	7	7	7	7	7	7	7	7	7	7	7	7	7	无	7	7	7	7	7
2006	2	1	3	2	4	2	2	2	1	3	4	3	3	3	3	3	3	3	3	4	4	4	4	4	4	4	4	4	4	4	4	4	4	4	4	4	4	4	4	4	4	4	4	无	3	3	4	3.33333	4
2007	2	4	2	2	2	3	3	2	1	1	3	5	5	4	5	4	4	4	4	3	3	5	4	5	4	5	4	5	4	5	4	2	2	2	4	5	5	5	5	5	5	5	4	无	4.75	4	3.75	4.16667	4.5
2008	1	1	3	2	2	2	2	3	1	2	1	5	5	5	5	5	4	4	5	5	5	5	4	5	4	4	5	5	5	3	5	6	4	5	4	5	5	6	6	6	5	6	5	无	5	4.5	4.75	4.75	4.5
2009	2	3	3	2	4	1	2	2	2	1	1	5	5	5	5	5	5	5	5	5	5	5	5	5	5	5	5	5	5	5	5	5	5	5	5	5	5	5	5	5	5	5	5	无	5	5	5	5	5
2010	2	1	3	2	4	1	1	3	2	2	4	4	3	4	4	4	4	4	4	4	4	4	4	4	4	4	5	4	5	3	4	4	3	4	4	4	5	5	4	5	5	5	5	对考公有帮助	3.75	4	4	3.91667	4.25
2011	1	3	3	2	4	3	1	5	2	2	4	4	5	4	5	5	4	5	4	5	4	5	4	5	4	5	4	5	4	5	4	4	5	5	5	4	4	6	6	6	5	4	5	好	4.5	4.5	4.5	4.5	4.5
2012	1	3	3	2	1	1	1	5	1	1	3	7	7	7	7	7	7	6	7	7	7	7	7	7	7	6	7	7	6	7	7	7	7	7	7	7	7	7	7	7	7	7	7	无	7	6.75	7	6.91667	6.75
2013	2	1	3	2	4	3	3	2	2	1	1	5	5	5	5	5	5	5	5	5	5	5	5	5	5	5	5	5	5	5	5	5	5	5	5	5	5	5	5	5	5	5	5	无	5	5	5	5	5
2014	2	3	3	2	2	2	2	3	1	1	3	5	5	7	5	6	6	6	6	6	5	6	6	4	4	5	4	4	4	5	3	4	5	3	3	4	3	3	5	3	3	5	5	无	5.5	6	5.75	5.75	4.25
2015	2	4	3	2	1	3	3	3	2	3	1	4	4	4	4	4	4	4	4	4	4	4	4	4	4	4	4	4	4	4	4	4	4	4	4	4	4	4	4	4	4	4	4	无	4	4	4	4	4
2016	2	3	2	2	3	2	1	5	2	2	4	4	4	4	4	3	3	3	3	3	3	3	3	3	3	3	3	5	5	5	5	4	4	4	4	4	4	4	4	4	4	4	4	无	4	3	3	3.33333	3
2017	2	3	5	2	2	3	3	1	2	1	3	4	4	4	4	4	4	4	4	4	4	4	4	4	4	4	4	4	4	4	4	4	4	4	4	4	4	4	4	4	4	4	4	实事求是	4	4	4	4	4
2018	2	3	2	2	4	2	2	1	1	2	2	4	4	4	4	4	4	4	4	4	4	4	4	4	4	4	4	4	4	4	4	4	4	4	4	4	4	4	4	4	4	4	4	无	4	4	4	4	4
[truncated: 101 more rows]
[truncated: 5 more columns]
