# Supplementary material
Source: Research Square preprint supplement (doi:10.21203/rs.3.rs-9812393/v1)
Supplement: Supplementary file 5 [file 62a287d528d17357892962f9.xlsx]

## Sheet: data
id	gender	grade	major	type	hometown	father_edu	mother_edu	rank	cadre	career_course	internship	C1	C2	C3	C4	C5	C6	C7	C8	C9	C10	C11	C12	S1	S2	S3	S4	S5	S6	S7	S8	S9	S10	S11	S12	I1	I2	I3	I4	I5	I6	I7	I8	open_text
1	2	3	2	1	2	1	2	1	1	1	1	7	7	6	6	6	5	6	7	7	7	7	6	7	7	7	7	7	7	6	7	6	7	7	7	7	6	6	6	7	7	7	7	合理规划参与实践
2	1	4	2	1	2	3	1	2	1	1	2	5	4	5	5	5	5	4	5	5	4	5	5	5	4	5	5	5	5	4	5	4	5	5	4	4	4	5	4	4	4	5	4	无
3	2	1	2	1	1	2	2	4	2	1	4	4	4	4	4	4	4	4	4	4	4	4	4	4	4	4	4	4	4	4	4	4	4	4	4	4	4	4	4	4	4	4	4	🈚️
4	2	1	2	1	2	1	1	1	1	1	1	7	7	7	7	7	7	7	7	7	7	7	7	7	7	7	7	7	7	7	7	7	7	7	7	7	7	7	7	7	7	7	7	无
5	2	4	2	1	2	2	2	2	2	3	2	7	6	7	6	6	6	7	6	7	6	7	7	7	6	7	6	7	7	7	6	7	7	7	7	7	6	7	6	7	6	7	6	无
6	2	1	2	1	4	1	1	1	2	1	1	3	3	3	3	2	2	2	2	3	3	3	3	3	3	3	3	3	3	3	3	3	3	3	3	3	3	3	3	3	3	3	3	无
7	2	1	2	1	4	2	2	4	2	2	2	7	6	4	4	4	5	3	5	5	3	6	6	5	3	3	2	5	3	3	6	5	5	5	5	5	3	4	5	5	5	4	4	无
8	2	4	2	1	4	2	2	1	2	1	3	6	5	5	5	5	5	5	5	4	4	4	4	5	4	5	4	6	5	5	5	4	4	4	4	5	4	4	5	4	4	4	4	暂无
9	2	4	2	1	4	1	2	2	2	1	3	6	6	7	6	6	5	5	6	7	6	6	6	6	6	6	5	6	6	6	4	5	6	7	6	6	6	6	6	5	5	5	5	无
10	1	4	2	1	4	2	2	2	2	1	3	7	7	4	4	4	4	4	4	4	3	3	4	6	4	6	6	7	7	7	7	4	4	4	4	7	7	7	7	6	5	5	4	无
11	2	4	2	1	4	2	1	2	1	2	1	5	3	4	4	4	3	4	4	5	5	6	4	5	4	5	4	6	5	5	4	4	6	6	5	4	5	5	5	5	5	6	5	无
12	2	1	2	1	4	2	1	2	1	1	1	4	2	4	4	2	2	3	3	5	4	3	3	4	4	4	4	5	4	5	4	3	5	4	5	4	5	4	5	4	5	4	3	无
13	2	4	2	1	3	1	1	1	2	3	3	5	5	6	5	6	5	6	5	5	5	6	5	4	5	5	5	6	4	5	5	5	5	6	5	4	6	5	5	6	5	5	6	增加实践
14	2	4	2	1	1	3	3	1	2	1	2	6	4	6	6	7	7	7	7	7	7	7	6	7	7	7	7	7	7	7	7	7	7	7	7	6	6	7	6	6	5	6	6	没有不足
15	2	1	2	1	4	1	1	1	1	1	1	7	7	7	7	7	7	7	7	7	7	7	7	7	7	7	7	7	7	7	7	7	7	7	7	7	7	7	7	7	7	7	7	无
16	2	1	2	1	4	2	1	3	2	1	4	1	1	1	3	1	1	1	1	1	1	1	1	5	5	5	5	5	5	5	5	5	5	5	5	6	6	6	6	6	6	6	6	无
17	2	1	2	1	4	1	1	5	2	1	1	2	4	6	5	6	3	4	5	5	5	4	5	5	4	4	4	4	4	5	4	3	4	2	3	3	2	3	3	4	4	4	4	无
18	2	1	2	1	4	2	2	1	2	1	1	4	5	7	6	6	5	5	5	5	5	4	6	5	5	5	5	5	5	5	5	5	5	5	5	5	5	5	6	5	5	5	5	无
19	1	2	2	1	2	3	3	3	2	2	1	5	5	5	5	5	5	5	5	5	5	5	5	5	5	5	5	5	5	5	5	5	5	5	5	5	5	5	5	5	5	5	5	🈚
20	1	2	5	1	2	2	2	1	1	1	3	5	6	6	6	6	6	6	6	6	6	6	6	6	6	6	6	6	6	6	6	6	6	6	6	6	6	6	6	6	6	6	6	无
21	2	4	2	1	4	2	1	5	2	1	3	4	4	4	4	4	4	4	4	4	4	4	4	4	4	4	4	4	4	4	4	4	4	4	4	4	4	4	4	4	4	4	4	无
22	2	4	2	1	4	1	1	3	2	1	2	4	4	5	4	6	5	5	5	3	4	3	4	4	4	4	4	4	4	4	4	4	4	4	4	6	4	4	4	4	5	4	4	无
23	1	1	1	1	3	1	1	1	1	1	1	1	1	1	1	1	1	1	1	1	1	1	1	1	1	1	1	1	1	1	1	1	1	1	1	1	1	1	1	1	1	1	1	无
24	2	2	2	1	4	1	1	1	2	1	4	5	5	5	5	5	5	5	5	5	5	5	5	5	5	5	5	5	5	5	5	5	5	5	5	5	5	5	5	5	5	5	5	无
25	2	4	2	1	4	1	1	2	2	2	3	4	4	4	4	4	4	4	4	4	4	4	4	4	4	4	4	4	4	4	4	4	4	4	4	4	4	4	4	4	4	4	4	无
26	2	4	2	1	4	1	1	3	2	1	3	4	4	5	5	3	3	3	3	5	5	4	4	4	4	4	4	5	4	4	4	4	5	4	5	3	3	3	4	4	4	4	4	希望可以多提供一下实践机会来增加就业经验
27	2	2	2	1	4	1	1	2	2	2	3	5	5	5	5	5	5	5	5	5	5	5	5	5	5	5	5	5	5	5	5	5	5	5	5	5	5	5	5	5	5	5	5	实践课多点
28	2	4	2	1	4	2	2	4	2	2	3	4	4	4	4	4	4	4	4	4	4	4	4	4	4	4	4	4	4	4	4	4	4	4	4	4	4	4	4	4	4	4	4	无
29	1	4	2	1	2	1	1	4	2	3	2	6	6	6	6	6	6	6	6	6	6	6	6	6	6	6	6	6	6	6	6	6	6	6	6	6	6	6	6	6	6	6	6	无
30	2	4	2	1	1	2	2	5	1	1	3	5	5	5	5	2	2	3	2	4	4	4	4	4	4	4	4	4	4	4	4	4	4	4	4	4	4	4	4	4	4	4	4	没有
31	2	2	3	2	4	2	1	1	1	1	1	4	3	7	7	7	7	7	7	6	6	6	6	6	6	6	6	6	6	6	6	6	6	6	6	6	6	6	6	6	6	6	6	嗯
32	2	4	2	1	4	1	1	2	2	2	3	6	6	4	5	4	4	4	5	5	5	4	4	5	4	5	5	6	5	5	4	4	5	4	5	5	4	4	5	4	5	3	5	无
33	2	2	5	1	2	2	2	1	1	2	1	4	4	4	4	4	4	4	4	4	4	4	4	4	4	4	4	4	4	4	4	4	4	4	4	4	4	4	4	4	4	4	4	无
34	1	2	5	1	4	3	1	1	1	2	1	7	7	7	7	7	7	7	7	7	7	7	7	7	7	7	7	7	7	7	7	7	7	7	7	7	7	7	7	7	7	7	7	无
35	1	2	2	2	4	1	1	2	2	2	3	7	6	5	6	6	6	6	6	6	6	6	5	3	6	5	5	5	5	5	5	5	5	6	5	6	6	6	6	6	5	5	6	无
36	2	2	1	1	2	2	2	1	1	1	1	4	4	3	5	4	3	4	4	4	4	4	4	4	4	4	4	5	5	5	5	5	4	5	5	5	5	5	5	5	5	5	5	越来越好
37	1	2	2	1	4	1	1	4	2	1	1	7	4	7	7	7	7	7	7	7	7	7	7	7	7	7	7	7	7	7	7	7	7	7	7	7	7	7	7	7	7	7	7	无
38	1	2	3	1	2	1	2	1	1	2	3	7	7	7	7	7	7	7	7	7	7	4	7	6	7	7	7	6	7	7	6	6	7	7	7	7	7	7	7	7	7	7	7	无
39	1	2	3	1	2	2	2	5	2	3	1	5	5	5	5	5	4	4	5	5	5	4	4	5	5	5	4	5	5	4	4	5	5	4	5	5	4	4	4	4	5	4	4	没了
40	2	2	5	1	4	1	1	4	2	1	1	4	4	4	4	4	4	4	4	4	4	4	4	4	4	4	4	4	4	4	4	4	4	4	4	4	4	4	4	4	4	4	4	无
41	2	2	3	1	3	1	1	1	1	3	1	7	4	4	7	1	1	1	1	3	3	3	3	4	4	4	4	4	4	4	4	4	4	4	4	4	4	4	4	4	4	4	4	无
42	2	2	2	1	3	1	1	4	2	3	1	4	4	4	4	3	2	2	3	3	3	3	3	2	3	2	3	7	4	4	3	2	3	2	3	5	7	7	7	5	5	5	5	无
43	2	2	2	1	4	1	1	2	1	2	1	6	6	6	4	4	6	5	5	3	5	5	1	7	6	4	4	5	5	5	5	5	5	5	5	4	4	4	4	5	5	5	6	无
44	1	2	3	1	3	1	1	5	1	2	3	5	1	7	4	7	6	5	4	4	4	6	7	3	6	6	5	7	7	5	7	5	5	5	5	5	5	5	5	5	5	5	5	没有
45	2	2	3	1	4	1	1	2	2	3	1	4	4	4	4	4	4	4	4	4	4	4	4	4	4	4	4	4	4	4	4	4	4	4	4	4	4	4	4	4	4	4	4	无
46	2	2	5	1	2	2	2	1	2	1	1	5	5	5	5	5	5	5	5	5	5	4	5	5	4	5	5	5	4	5	5	5	5	5	5	5	5	5	5	5	5	5	5	无
47	2	1	5	1	2	1	2	4	2	1	1	5	5	5	5	2	2	2	2	5	5	4	4	5	5	3	3	4	3	3	4	2	5	3	3	5	3	5	5	3	3	3	3	无
48	1	2	3	1	4	2	1	3	1	2	1	4	5	5	4	4	4	4	4	4	4	4	4	4	4	4	4	4	4	4	4	4	4	4	4	4	4	4	4	4	4	4	4	提高专业能力
49	2	2	5	1	4	2	2	1	1	1	1	7	7	7	7	7	7	7	7	7	7	7	7	7	7	7	7	7	7	7	7	7	7	7	7	7	7	7	7	7	7	7	7	无
50	2	2	5	1	4	1	1	1	2	2	1	4	3	4	6	3	3	4	4	3	4	4	4	4	4	4	5	7	7	5	6	4	5	4	6	5	5	4	7	6	5	6	5	无
51	2	2	3	1	4	1	2	2	2	2	1	5	4	4	4	5	4	4	5	5	4	4	5	5	5	4	5	5	5	6	6	6	6	6	6	6	6	6	5	6	5	6	5	无
52	2	4	3	1	2	1	1	2	2	2	3	6	6	6	6	6	6	6	6	6	6	6	6	6	6	6	6	6	6	6	6	6	6	6	6	6	6	6	6	6	6	6	6	无
53	2	2	5	1	4	1	1	2	2	1	3	3	5	2	3	4	3	4	5	3	3	4	4	4	3	3	4	7	6	5	4	3	4	4	5	5	4	5	5	5	5	5	4	无
54	1	2	3	1	4	1	1	2	1	1	1	6	5	7	5	7	6	7	4	7	5	7	7	5	5	5	7	5	6	4	7	5	6	6	7	6	5	5	7	6	7	5	7	无
55	2	4	2	1	4	1	1	1	2	2	3	6	5	4	6	5	5	6	6	6	6	6	6	6	6	6	5	6	6	5	6	6	7	6	6	5	5	5	5	6	7	6	6	无
56	2	2	5	1	4	1	1	2	2	3	1	4	4	4	3	3	3	3	3	3	3	3	3	4	2	3	4	5	4	4	3	3	3	2	4	4	5	4	4	4	5	4	4	只有课堂上讲的，没有真实上手操作过
57	2	2	5	1	4	1	1	2	2	1	1	5	4	7	5	5	4	6	7	7	7	7	6	5	4	5	5	7	6	7	6	4	7	6	6	7	7	7	7	7	6	6	6	无
58	2	2	3	1	4	2	2	1	1	1	1	7	7	5	5	4	3	5	4	4	4	5	3	7	7	7	7	7	7	7	7	7	7	7	7	7	7	7	7	7	7	7	7	少些课堂内容 多些专业相关实践
59	1	1	1	1	1	3	3	3	1	1	1	4	4	5	4	4	2	2	3	4	3	3	3	3	4	3	3	3	4	3	3	5	2	5	3	5	5	5	5	5	2	5	2	无
60	2	1	1	1	4	2	2	1	1	2	4	4	4	4	4	4	4	4	4	4	4	4	4	4	4	4	4	4	4	4	4	4	4	4	4	4	4	4	4	4	4	4	4	无
61	1	1	1	1	3	1	1	1	1	1	1	7	7	7	7	7	7	7	7	7	7	7	7	7	7	7	7	7	7	7	7	7	7	7	7	7	7	7	7	7	7	7	7	无
62	1	1	1	1	1	3	3	3	2	3	4	4	4	4	4	4	4	4	4	4	4	4	4	4	4	4	4	4	4	4	4	4	4	4	4	4	4	4	4	4	4	4	4	无
63	2	1	1	1	4	1	1	1	2	1	1	4	4	4	6	5	5	5	5	5	5	5	5	5	5	5	5	6	5	5	5	4	4	4	4	4	5	5	5	6	6	6	6	无
64	1	1	5	1	3	2	2	5	2	2	1	5	5	5	5	5	5	5	5	5	5	5	5	5	5	5	5	5	5	5	5	5	5	5	5	5	5	5	5	5	5	5	5	无
65	2	1	1	1	4	2	1	1	1	2	4	3	1	3	4	4	4	4	4	4	4	3	4	4	3	4	4	3	4	4	3	4	5	4	5	5	4	5	4	5	5	4	5	无
66	1	1	1	1	3	1	1	5	2	1	2	7	7	7	7	7	7	7	7	7	7	7	7	7	7	7	7	7	7	7	7	7	7	7	7	7	7	7	7	7	7	7	7	无
67	2	1	2	1	1	2	3	3	1	1	3	2	3	5	6	3	5	7	6	4	5	6	6	5	3	5	6	6	6	6	6	6	6	3	7	6	4	3	6	4	3	2	3	无
68	1	1	1	1	4	1	1	1	1	1	1	7	7	7	7	7	7	7	7	7	7	7	7	7	7	7	7	7	7	7	7	7	7	7	7	7	7	7	7	7	7	7	7	无
69	1	1	1	1	2	1	1	3	2	1	1	5	1	2	3	1	1	1	1	1	1	1	1	1	1	1	1	4	2	2	1	1	1	1	1	5	5	3	3	3	2	2	2	无
70	1	1	1	1	4	1	1	1	1	1	1	7	7	7	7	1	1	1	1	1	1	1	1	1	1	1	1	1	1	1	1	1	1	1	1	1	1	1	1	1	1	1	1	无
71	1	1	1	1	2	3	3	1	1	1	1	6	2	4	6	4	4	4	5	5	5	5	5	4	5	6	6	4	5	6	5	5	5	5	5	6	6	5	6	6	6	6	6	无
72	1	1	1	1	4	1	1	5	2	2	3	2	2	2	2	2	2	2	2	2	2	2	2	2	2	2	2	2	2	2	2	2	2	2	2	2	2	2	2	2	2	2	2	无
73	2	1	2	1	4	1	1	1	2	3	4	5	5	4	5	5	4	5	5	5	4	5	5	5	4	5	5	6	4	5	5	4	5	4	5	5	6	6	6	5	4	5	4	无
74	2	1	2	1	4	2	1	2	2	2	1	3	3	3	3	3	2	3	4	4	4	4	4	3	4	4	4	2	5	3	3	4	5	4	3	3	2	3	4	4	4	4	4	无
75	1	1	1	1	2	2	2	1	2	1	4	5	5	5	5	5	5	5	5	5	5	5	5	5	5	5	5	5	5	5	5	5	5	5	5	5	5	5	5	5	5	5	5	.
76	2	1	1	1	4	1	2	1	2	1	1	7	7	5	6	5	5	4	4	6	6	6	7	6	7	6	7	6	4	5	3	4	4	4	6	6	7	7	7	7	7	7	6	无
77	2	1	1	1	3	1	2	4	2	1	1	6	6	6	6	4	4	4	4	4	4	4	4	4	4	4	4	4	4	4	4	4	4	4	4	4	4	4	4	4	4	4	4	没有
78	2	2	5	1	2	2	2	5	2	3	4	4	4	4	4	4	4	4	4	4	4	4	4	4	4	4	4	4	4	4	4	4	4	4	4	4	4	4	4	4	4	4	4	无
79	2	2	5	1	4	1	1	3	2	3	1	7	6	5	5	4	4	5	3	3	3	3	4	4	4	4	4	7	4	7	4	4	4	5	6	7	7	7	7	4	3	4	4	无
80	2	2	3	1	2	2	2	2	2	3	1	6	4	6	5	4	4	4	6	5	6	6	6	6	4	5	6	6	5	5	4	5	6	5	6	6	6	6	6	5	5	5	5	无
81	2	1	1	1	2	3	3	1	1	2	4	6	6	6	6	7	7	7	7	7	7	7	7	7	7	7	7	7	7	7	7	7	7	7	7	7	7	7	7	7	7	7	7	无
82	2	2	5	1	4	2	1	1	1	2	1	5	5	5	5	5	5	5	5	5	5	5	5	5	5	5	5	5	5	5	5	5	5	5	5	5	5	5	5	5	5	5	5	无
83	1	1	2	1	2	1	1	5	2	2	1	6	6	6	6	6	6	6	6	6	6	6	6	6	6	6	7	7	6	6	6	6	6	6	6	5	6	6	7	6	6	6	6	无
84	1	1	2	1	4	1	1	2	2	2	1	7	7	7	7	7	7	7	7	7	7	7	7	7	7	7	7	7	7	7	7	7	7	7	7	7	7	7	7	7	7	7	7	无
85	1	1	2	1	2	2	2	1	1	1	1	6	4	4	6	4	3	3	3	5	4	4	3	3	3	3	3	4	3	3	3	3	3	4	4	5	5	5	5	4	3	4	4	我觉得还没特别清晰自己未来的职业方向
86	2	1	1	1	4	2	2	3	2	1	4	7	5	5	7	5	6	7	7	7	7	7	7	7	7	7	7	7	5	6	6	4	6	6	5	7	7	7	7	7	7	7	7	无
87	2	2	2	1	2	2	2	4	2	2	1	5	5	5	5	5	5	4	4	4	4	5	5	5	5	5	5	5	4	5	4	5	4	5	4	5	4	5	4	5	4	5	4	无
88	1	1	1	1	4	1	1	3	2	2	1	7	7	7	7	7	7	7	7	7	7	7	7	7	7	7	7	7	7	7	7	7	7	7	7	7	7	7	7	7	7	7	7	无
89	2	1	5	1	2	2	2	1	2	2	1	7	6	5	6	6	6	6	6	6	7	7	6	5	5	5	5	7	6	5	3	1	6	4	7	6	5	6	6	5	5	5	5	多分析一下当下行业的就业形势
90	2	2	5	1	4	2	2	1	1	2	1	4	4	4	4	3	3	4	3	5	4	4	4	5	4	4	4	6	4	3	4	3	5	4	5	4	4	4	4	4	4	4	4	我觉得职业本科更应该注重实践方面的教学，学习实操技能而非一直在教室上课，枯燥又无用老师每天都在讲自己，
91	2	1	1	1	4	1	1	2	2	1	4	3	1	4	3	3	3	3	4	3	3	3	3	3	3	3	3	3	3	3	3	3	3	3	3	4	4	4	4	3	3	4	3	无
92	2	1	1	1	4	1	1	4	2	1	1	6	6	6	6	6	6	6	6	6	6	6	6	6	6	6	6	6	6	6	6	6	6	6	6	6	6	6	6	6	6	6	6	无
93	2	1	1	1	4	2	1	3	1	1	1	6	6	6	6	6	6	5	6	5	6	6	5	6	6	4	5	6	4	4	5	5	6	5	7	6	5	5	6	5	6	5	6	无
94	2	2	5	1	4	1	1	2	2	1	1	4	5	4	5	5	4	5	4	5	4	4	4	5	5	5	5	6	6	6	6	3	5	5	5	5	5	5	5	5	5	5	5	多组织技能课程
95	1	1	1	1	2	3	2	3	2	1	1	6	5	5	6	4	3	4	5	3	4	5	4	3	4	5	4	5	4	5	4	3	4	5	4	5	4	5	4	4	5	4	4	无
96	2	2	5	1	4	1	1	1	2	1	1	7	7	7	7	7	7	7	7	7	7	7	7	7	7	7	7	7	7	7	7	7	7	7	7	7	7	7	7	7	7	7	7	无
97	1	1	1	1	3	2	1	3	2	3	1	5	4	6	5	5	4	5	6	4	4	5	5	4	3	5	5	5	4	6	4	5	4	5	4	6	6	6	6	6	4	6	3	无
98	1	1	1	1	4	2	1	4	2	2	4	6	6	6	6	6	6	6	6	6	6	6	6	6	6	6	6	6	6	6	6	6	6	6	6	6	6	6	6	6	6	6	6	无
99	1	2	3	1	4	1	1	5	2	2	1	4	4	4	4	4	4	4	4	4	4	4	4	4	4	4	4	4	4	4	4	4	4	4	4	4	4	4	4	4	4	4	4	无
100	1	2	3	1	3	1	1	4	2	1	1	4	4	4	4	4	4	4	4	4	4	4	4	4	4	4	4	4	4	4	4	4	4	4	4	4	4	4	4	4	4	4	4	无
101	1	1	1	1	4	1	1	2	1	1	1	7	7	7	7	7	7	7	7	7	7	7	7	7	7	7	7	7	7	7	7	7	7	7	7	7	7	7	7	7	7	7	7	无
102	2	2	3	1	2	2	2	1	1	1	1	5	3	3	5	3	3	3	3	5	4	5	4	6	4	5	6	6	5	5	7	5	5	6	5	5	5	4	7	6	6	6	7	无
103	2	2	5	2	4	1	1	2	2	1	4	3	4	5	6	5	5	5	5	4	3	5	5	5	4	3	3	7	3	4	3	5	3	5	4	4	4	7	6	5	4	5	4	无
104	2	2	5	1	4	1	1	2	2	1	1	7	6	6	7	6	6	6	6	6	6	6	6	6	6	6	6	6	6	6	6	6	6	6	6	6	6	6	6	6	6	6	6	无
105	1	2	5	1	3	2	2	4	2	3	1	7	7	7	7	7	7	7	7	7	7	7	7	7	7	7	7	7	7	7	7	7	7	7	7	7	7	7	7	7	7	7	7	无
106	1	2	2	1	2	3	2	1	1	1	4	7	7	7	7	7	7	7	7	7	7	7	7	7	7	7	7	7	7	7	7	4	4	5	4	7	7	7	7	7	7	7	7	学习
107	2	2	5	1	4	1	1	2	2	1	4	3	1	2	4	3	2	6	2	2	6	2	4	5	6	6	5	7	3	6	5	1	2	2	1	4	4	3	7	4	2	2	1	无
108	2	2	3	1	4	2	2	4	2	1	1	4	1	2	5	4	3	5	3	3	3	3	4	5	2	2	4	6	2	4	4	2	2	3	3	5	4	4	6	4	4	4	3	无
109	2	1	2	2	4	1	1	2	2	2	1	4	3	5	5	4	4	5	5	3	4	5	5	3	3	3	4	4	4	4	3	3	4	3	5	5	5	5	5	4	5	5	5	现在没有
110	2	1	5	1	4	1	2	1	1	1	1	6	6	6	6	6	6	6	6	6	6	6	6	6	6	6	6	6	6	6	6	6	6	6	6	6	6	6	6	6	6	6	6	无
111	2	4	2	1	4	2	1	1	1	1	1	7	7	7	7	7	7	7	7	7	7	7	7	7	7	7	7	7	7	7	7	7	7	7	7	7	7	7	7	7	7	7	7	无
112	1	1	5	1	3	1	1	5	2	3	1	4	3	4	5	3	3	5	5	3	3	3	3	3	4	4	5	4	3	3	3	4	3	4	4	4	4	4	4	4	5	5	5	无
113	1	1	5	1	4	1	2	1	1	2	1	5	4	4	4	3	5	5	3	4	5	5	5	4	3	5	5	6	2	1	4	5	5	5	5	6	3	5	3	6	3	5	5	本专业的跨境电商运营、国际贸易、跨境物流等核心课程，为我从事跨境电商相关岗位搭建了完整的知识体系；课堂中的平台实操实训、企业实习等实践环节，让我掌握了店铺运营、选品、客户沟通等实用技能，为我未来的职业发展提供了有力支撑。
114	2	1	5	1	3	2	1	3	2	1	4	3	3	3	4	3	3	3	2	2	4	5	5	3	3	3	4	6	5	5	3	3	4	3	3	5	5	3	5	5	4	3	5	无
115	1	1	2	1	3	1	2	5	2	1	1	3	3	3	5	3	3	4	5	5	5	5	4	3	3	3	4	7	3	3	2	2	3	3	3	4	4	5	5	4	4	4	3	水课少一点，专业理论实践课程多一些
116	2	1	5	1	1	1	1	1	1	1	3	6	5	5	5	5	5	5	5	5	5	5	5	5	5	5	5	5	5	5	5	5	5	5	5	5	5	5	5	5	5	5	5	1
117	2	2	5	1	4	1	1	2	2	2	1	5	6	6	6	3	3	5	4	5	6	6	4	3	4	5	5	5	3	5	6	6	6	6	6	6	6	6	6	6	6	6	6	没有
118	1	2	3	1	4	1	1	4	2	2	1	4	4	4	4	4	4	4	4	4	4	4	4	4	4	4	4	4	4	4	4	4	4	4	4	4	4	4	4	4	4	4	4	无
119	1	2	3	1	2	2	1	1	1	2	1	4	5	5	5	5	5	5	5	4	5	5	5	5	5	5	5	5	5	5	5	1	4	3	5	4	3	4	4	3	3	4	4	多出去实践一下比较好
120	1	2	3	1	2	1	1	5	2	3	1	1	1	7	7	7	7	7	7	7	1	1	1	1	1	1	1	4	2	1	1	1	1	4	1	1	1	1	1	1	1	1	1	无
121	2	1	5	1	2	2	1	3	2	1	1	2	6	4	6	6	6	6	7	4	6	6	2	2	2	2	3	3	1	4	2	2	7	2	7	2	2	4	4	2	2	7	2	无
122	2	4	2	1	4	1	1	2	2	1	1	5	4	5	4	3	3	5	4	5	5	5	5	5	4	4	3	5	4	3	3	3	5	5	3	3	3	3	3	5	4	5	4	无
123	2	1	5	1	3	3	3	1	1	2	1	4	3	3	4	2	2	2	2	2	2	3	3	2	2	2	2	3	3	3	3	3	3	3	3	4	4	4	4	5	5	5	5	多实践
124	1	2	5	1	3	1	1	5	2	3	4	4	4	4	4	4	4	4	4	4	4	4	4	4	4	4	4	4	4	4	4	4	4	4	4	4	4	4	4	4	4	4	4	无
125	2	2	1	1	4	1	1	1	1	2	1	5	5	5	5	4	4	4	4	4	4	4	4	4	4	4	4	4	4	4	4	4	4	4	4	4	4	4	4	4	4	4	4	多开设实践课程
126	2	1	2	1	1	3	3	5	2	1	1	4	5	3	5	3	3	4	3	3	6	6	3	4	4	4	4	6	3	6	3	2	2	4	5	4	4	4	4	5	5	4	5	无
127	1	1	1	1	4	1	1	3	2	2	3	7	7	7	7	7	7	7	7	7	7	7	7	7	7	7	7	7	7	7	7	7	7	7	7	7	7	7	7	7	7	7	7	无建议
128	2	2	3	1	4	1	1	2	1	2	1	5	5	5	5	5	5	5	5	4	4	4	4	3	3	3	3	4	4	4	4	4	5	4	5	5	5	5	5	5	5	5	5	无
129	2	1	3	1	4	1	1	1	1	2	4	5	3	4	5	3	3	4	3	2	4	4	3	2	3	3	4	3	4	4	5	3	5	3	4	3	3	3	4	4	3	4	4	更多的加强与企业项目对口链接
130	1	2	4	1	3	1	1	4	1	2	1	5	4	3	4	3	4	3	3	2	4	3	4	4	3	4	5	5	4	5	2	2	2	3	3	4	4	3	3	5	5	5	5	多结合实践或者实际应用时的场景能更好的帮助我学习
131	1	3	1	1	2	3	1	1	1	2	1	5	5	5	5	5	5	5	5	5	5	5	5	5	5	5	5	5	5	5	5	5	5	5	5	5	5	5	5	5	5	5	5	无
132	1	3	1	1	2	3	2	2	2	1	2	5	3	6	5	5	6	5	6	5	4	6	5	6	5	5	5	6	5	6	6	5	5	6	5	5	6	6	5	5	6	5	5	无
133	2	3	2	1	2	2	2	1	1	1	1	7	7	7	7	6	7	7	7	7	7	7	7	7	7	7	7	7	7	7	7	7	7	7	7	7	7	7	7	7	7	7	7	增加社会实践
134	2	2	5	1	4	2	2	4	2	1	1	5	4	4	4	4	4	4	4	4	4	4	4	4	4	4	4	4	4	4	4	4	4	4	4	4	4	4	4	4	4	4	4	挺好的
135	1	1	1	1	2	3	3	1	1	1	1	7	7	7	7	7	7	7	7	7	7	7	7	7	7	7	7	7	7	7	7	7	7	7	7	7	7	7	7	7	7	7	7	无
136	1	1	1	1	4	3	3	3	1	2	2	5	5	5	4	4	5	5	4	4	4	5	5	4	4	4	5	4	4	5	5	4	4	4	5	4	4	4	4	4	4	4	4	无
137	2	2	3	1	2	3	3	1	1	1	2	7	6	5	6	6	6	6	6	6	6	6	6	6	6	6	6	7	6	6	5	6	6	4	6	7	7	7	7	6	6	6	6	无
138	1	2	3	1	4	2	2	4	2	1	1	7	7	7	7	7	7	7	7	7	7	7	7	7	7	7	7	7	7	7	7	7	7	7	7	7	7	7	7	7	7	7	7	无
139	2	2	2	1	4	1	1	5	2	2	1	4	4	4	4	5	3	4	4	4	4	4	4	4	4	4	4	4	4	4	4	4	4	4	4	4	4	4	4	4	4	4	4	无
140	1	1	1	1	4	2	2	1	2	2	1	2	1	1	1	1	1	1	2	1	1	1	1	1	1	1	1	1	1	1	1	1	1	1	1	1	1	5	1	1	1	1	1	无
141	2	2	2	1	4	2	2	3	2	2	1	7	7	7	7	7	7	7	7	7	7	7	7	7	7	7	7	7	7	7	7	7	7	7	7	7	7	7	7	7	7	7	7	无
142	2	2	2	1	2	1	1	1	1	1	3	5	5	5	5	5	5	5	5	5	5	5	5	5	5	5	5	6	6	6	5	4	5	5	5	5	4	5	5	5	5	5	5	无
143	2	2	2	1	2	3	3	2	1	1	1	4	4	4	4	4	4	4	4	4	4	4	4	4	4	4	4	4	4	4	4	4	4	4	4	4	4	4	4	4	4	4	4	无
144	2	2	2	1	2	1	1	4	2	2	3	5	5	5	5	4	4	4	4	4	4	4	4	4	4	4	4	4	4	4	4	4	4	4	4	4	4	4	4	4	4	4	4	无
145	2	2	2	1	4	2	4	2	2	1	1	4	3	4	4	3	3	4	4	4	5	4	4	5	4	3	4	5	4	4	3	4	5	3	4	4	4	4	4	4	4	3	4	无
146	2	2	2	1	4	2	2	3	2	1	1	7	4	6	6	5	5	5	5	5	5	5	5	5	5	5	5	5	5	5	5	5	5	5	5	5	5	5	5	5	5	5	5	无
147	2	2	5	1	3	2	2	2	2	1	1	7	7	7	7	7	7	7	7	7	7	7	7	7	7	7	7	7	7	7	7	7	7	7	7	7	7	7	7	7	7	7	7	无
148	2	2	2	1	4	1	2	3	2	3	1	4	4	4	4	4	4	4	4	4	4	4	4	5	5	5	5	3	3	3	3	3	3	3	3	4	4	4	4	5	5	5	5	无
149	2	2	5	2	4	1	1	4	2	3	4	1	1	1	4	1	1	1	1	1	1	1	1	5	5	5	5	5	1	1	1	1	1	1	1	2	1	2	1	1	1	1	1	无
150	1	2	5	1	3	1	1	1	1	3	1	2	3	2	3	2	3	2	3	2	3	2	2	2	3	2	2	6	5	6	5	6	5	6	5	6	5	5	5	6	5	6	5	无
151	2	2	2	1	4	2	2	1	2	1	3	7	7	6	6	5	5	5	6	7	6	6	6	6	5	5	5	7	5	5	5	6	7	6	7	7	6	7	7	7	7	7	7	无
152	2	2	2	1	2	1	2	1	1	2	1	4	2	3	5	1	3	3	4	2	2	2	2	2	2	2	2	2	2	2	1	1	3	3	3	4	4	3	3	3	3	3	3	无
153	2	2	2	1	4	2	1	1	1	1	3	6	6	6	6	6	6	6	6	6	6	6	6	6	6	6	6	6	6	6	6	6	6	6	6	6	6	6	6	6	6	6	6	无
154	2	4	2	1	4	1	1	3	2	1	3	7	5	7	7	7	6	6	5	7	5	5	6	6	5	6	7	6	4	5	3	5	5	4	4	5	4	5	5	6	5	5	4	可以多点实践
155	1	1	3	1	2	3	3	2	1	1	1	7	7	7	7	7	7	7	7	7	7	7	7	7	7	7	7	7	7	7	7	7	7	7	7	7	7	7	7	7	7	7	7	五
156	2	2	2	1	4	1	1	4	2	2	3	3	3	3	3	3	3	3	3	3	3	3	3	3	3	3	3	4	4	4	4	4	4	4	4	4	4	4	4	4	4	4	4	无
157	2	2	2	1	4	1	1	1	1	1	1	6	5	7	5	6	5	6	5	6	6	6	6	6	6	6	6	6	6	6	6	6	6	6	6	6	6	7	6	4	6	6	5	无
158	2	2	2	1	2	2	2	1	2	1	1	7	7	7	7	7	7	7	7	7	7	7	7	7	7	7	7	7	7	7	7	7	7	7	7	7	7	7	7	7	7	7	7	无
159	2	2	1	1	2	3	2	1	1	1	1	7	7	7	7	7	7	7	7	7	7	7	7	7	7	7	7	7	7	7	7	7	7	7	7	7	7	7	7	7	7	7	7	无
160	1	2	1	1	4	1	1	2	2	2	4	7	7	7	7	7	7	7	7	7	7	7	7	7	7	7	7	7	7	7	7	7	7	7	7	7	7	7	7	7	7	7	7	无
161	2	2	2	1	2	3	3	1	1	1	3	5	5	5	5	5	5	6	5	5	5	5	5	5	4	3	5	5	4	4	4	3	6	5	5	5	4	4	6	6	5	5	5	无
162	1	2	1	1	4	1	1	3	2	3	4	3	3	3	3	3	3	3	3	3	3	3	3	3	3	3	3	3	3	3	3	3	3	3	3	3	3	3	3	3	3	3	3	无
163	2	2	5	1	2	2	2	3	2	1	1	6	5	6	7	6	6	6	6	6	5	6	6	6	5	5	6	6	6	6	6	5	6	5	6	6	6	6	6	6	6	6	6	无
164	2	2	2	2	3	1	1	5	1	1	1	7	7	7	7	7	7	7	7	7	7	7	7	7	7	7	7	7	7	7	7	7	7	7	7	7	7	7	7	7	7	7	7	无
165	2	2	2	1	2	1	1	2	2	3	1	4	4	4	4	4	4	4	4	4	4	4	4	4	4	4	4	4	4	4	4	4	4	4	4	4	4	4	4	4	4	4	4	无
166	2	2	2	1	2	2	2	1	2	2	1	5	3	4	4	3	3	3	3	4	4	4	4	4	4	4	4	4	4	4	4	4	4	4	4	4	4	4	4	4	4	4	4	无
167	2	2	1	1	3	2	2	2	2	1	1	7	7	7	7	7	7	7	7	7	7	7	7	7	7	7	7	7	7	7	7	7	7	7	7	7	7	7	7	7	7	7	7	无
168	2	2	1	1	4	1	1	1	2	1	1	7	4	3	3	4	4	4	4	4	4	4	4	4	4	4	4	7	4	5	4	4	4	4	6	4	6	6	4	5	5	5	5	无
169	2	2	2	1	4	1	1	3	2	2	1	3	3	3	3	3	3	3	3	3	3	3	3	3	3	3	3	3	3	3	3	3	3	3	3	3	3	3	3	3	3	3	3	没有不足
170	1	2	3	1	4	1	1	3	2	2	1	7	4	3	7	4	4	4	4	4	4	4	4	5	4	4	4	4	4	4	4	1	4	4	4	5	2	2	4	4	4	4	4	🕶
171	2	2	1	1	4	1	1	1	2	2	3	5	4	4	4	5	3	4	4	5	4	4	5	3	3	3	4	6	4	4	2	3	3	4	4	4	4	4	6	2	2	2	4	增多一下实践活动
172	2	2	2	2	3	1	2	2	1	1	1	7	7	7	7	7	7	7	7	7	7	7	7	7	7	7	7	7	7	7	7	7	7	7	7	7	7	7	7	7	7	7	7	无
173	1	2	1	1	4	1	2	1	2	1	4	1	1	3	3	1	1	1	1	3	3	3	2	3	3	3	3	7	3	5	4	1	4	1	1	4	6	5	7	5	4	4	5	无
174	1	2	2	1	4	2	1	5	2	2	1	3	3	3	3	3	3	3	3	3	3	3	3	3	3	3	3	3	3	3	3	3	3	3	3	3	3	3	3	3	3	3	3	可以
175	1	2	1	1	4	3	2	3	2	1	1	4	4	4	4	4	4	4	4	4	4	4	4	4	4	4	4	4	4	4	4	4	4	4	4	5	5	5	5	5	5	5	5	无
176	1	1	1	1	4	1	1	1	1	2	4	5	5	5	5	5	5	5	5	5	5	5	5	5	5	5	5	5	5	5	5	5	5	5	5	5	5	5	5	5	5	5	5	无
177	1	2	1	1	4	1	2	3	2	2	1	5	4	4	5	4	4	5	5	4	4	4	4	4	4	4	5	7	4	4	4	4	6	5	6	6	7	6	6	5	4	5	4	没有
178	2	2	1	1	4	1	1	2	2	1	1	5	2	2	4	2	3	5	2	2	4	3	4	3	4	4	4	4	3	4	3	1	4	5	5	4	4	5	6	1	1	2	1	内容难理解，不知道具体应用
179	2	2	5	1	4	1	1	3	2	3	4	5	5	6	6	5	5	5	5	5	5	4	6	4	5	5	5	5	4	5	5	5	5	5	5	5	5	5	5	5	5	5	5	没有
180	1	3	3	1	2	3	3	1	1	1	1	6	6	6	6	6	6	6	6	6	6	6	6	6	6	6	6	6	6	6	6	6	6	6	6	6	6	6	6	6	6	6	6	无
181	2	3	2	1	2	2	2	1	1	2	1	4	4	4	4	4	4	4	4	4	4	4	4	4	4	4	4	4	4	4	4	4	4	4	4	4	4	4	4	4	4	4	4	无
182	2	3	2	1	4	1	1	4	2	1	3	7	7	7	7	7	7	7	7	7	7	7	7	7	7	7	7	7	7	7	7	7	7	7	7	7	7	7	7	5	5	5	5	无
183	2	2	2	1	4	1	1	1	1	3	1	3	3	3	3	3	3	3	3	3	3	3	3	3	3	3	3	3	3	3	3	3	3	3	3	3	3	3	3	3	3	3	3	无
184	2	3	2	1	2	1	1	2	1	1	1	3	4	4	3	3	4	3	3	3	4	2	4	4	3	4	4	5	2	5	4	4	4	3	6	4	5	5	5	5	5	5	4	无
185	2	3	2	1	4	2	2	3	2	1	1	5	4	4	4	5	4	5	4	4	4	5	4	5	4	5	5	5	4	5	5	4	5	5	4	4	4	5	5	4	5	5	5	。
186	2	2	2	1	4	1	1	2	2	3	3	6	6	6	6	5	4	5	3	6	3	3	6	5	4	4	5	5	5	5	5	5	5	5	5	5	5	5	5	5	5	5	5	无
187	2	2	2	1	3	1	1	2	2	1	1	6	6	5	3	4	4	4	6	4	5	5	5	4	4	4	4	6	5	5	4	4	6	5	6	5	5	5	6	6	4	6	4	无
188	1	1	1	1	2	3	3	4	2	1	1	3	3	3	3	3	2	2	5	3	3	3	3	3	3	3	3	3	3	3	3	3	3	3	3	3	3	3	3	3	3	3	3	无
189	1	1	1	1	2	1	1	3	2	3	1	7	7	7	7	7	7	7	7	7	7	7	7	7	7	7	7	7	7	7	7	7	7	7	7	7	7	7	7	7	7	7	7	无
190	2	2	2	1	4	1	1	1	1	1	1	4	4	4	4	4	4	4	4	5	5	4	5	4	3	5	3	5	6	5	7	5	6	6	6	6	7	6	6	3	4	3	2	无
191	2	2	2	2	2	1	1	2	2	1	1	7	7	7	7	7	7	7	7	7	7	7	7	7	7	7	7	7	7	7	7	7	7	7	7	7	7	7	7	7	7	7	7	无
192	2	3	2	1	2	1	1	1	1	1	1	3	2	6	4	2	2	2	2	5	2	3	4	3	3	2	1	6	5	4	5	1	4	2	1	4	4	4	5	3	1	3	3	实践环节缺少价值
193	2	3	1	1	4	1	1	1	2	1	1	5	4	5	5	4	4	4	5	5	5	5	5	5	4	4	4	5	4	5	3	3	6	4	4	4	5	5	5	4	4	5	4	无
194	2	2	5	1	4	1	1	2	2	2	1	7	5	6	7	4	3	3	3	3	3	4	5	4	4	4	4	7	4	4	3	3	3	3	4	5	4	5	6	4	4	4	4	多学一些实操课程
195	2	2	2	1	2	1	2	1	1	1	3	6	6	6	6	6	6	6	6	6	7	7	6	6	7	6	6	6	6	6	6	6	6	6	6	6	7	7	6	6	6	6	6	没有
196	1	3	1	1	3	1	1	3	2	2	4	4	4	4	4	4	4	4	4	4	4	4	4	4	4	4	4	4	4	4	4	2	3	5	4	4	1	2	2	3	4	3	4	无
197	2	2	5	2	4	3	1	1	2	1	1	5	4	4	4	5	5	5	5	4	4	4	4	5	5	5	5	5	5	5	5	5	5	5	5	5	5	5	5	5	5	5	5	无
198	2	3	1	1	3	1	1	3	1	2	1	4	4	4	4	4	4	4	4	4	4	4	4	4	4	4	4	4	4	4	4	4	4	4	4	4	4	4	4	4	4	4	4	无
199	2	3	1	1	4	1	1	1	2	1	1	4	4	4	4	4	4	4	4	4	4	4	4	4	4	4	4	4	4	4	4	4	4	4	4	4	4	4	4	4	4	4	4	无
200	2	3	1	1	4	2	1	3	1	1	1	7	7	7	7	7	7	7	7	7	7	7	7	7	7	7	7	7	7	7	7	7	7	7	7	7	7	7	7	7	7	7	7	都很好，没有不足
201	2	3	1	1	4	1	1	1	2	1	1	4	3	4	4	4	3	4	4	4	3	4	3	4	3	4	3	4	5	4	5	4	5	4	5	4	3	4	3	4	5	4	5	无
202	2	3	1	2	2	1	2	2	1	1	1	4	4	4	4	4	4	4	4	4	4	4	4	4	4	4	4	4	4	4	4	4	4	4	4	4	4	4	4	4	4	4	4	无
203	2	2	5	1	4	1	1	1	2	2	1	4	4	3	5	3	4	3	3	4	3	3	3	4	4	4	4	5	5	3	4	4	4	3	4	4	5	3	4	4	4	3	3	无
204	1	3	1	1	4	1	1	5	2	1	1	4	4	4	4	4	4	4	4	4	4	4	4	4	4	4	4	4	4	4	4	4	4	4	4	4	4	4	4	4	4	4	4	无
205	1	3	1	1	2	3	3	1	1	2	1	4	4	4	4	4	4	4	4	4	4	4	4	4	4	4	4	4	4	4	4	4	4	4	4	4	4	4	4	4	4	4	4	没有
206	2	2	2	1	3	2	2	4	2	3	1	5	3	3	5	4	4	4	3	4	6	5	6	7	7	7	7	7	7	7	7	4	7	5	7	7	7	7	7	7	7	7	7	无
207	2	2	5	1	3	1	1	4	2	2	1	7	7	7	7	7	7	7	7	7	7	7	7	7	7	7	7	7	7	7	7	7	7	7	7	7	7	7	7	7	7	7	7	于
208	1	2	2	1	4	3	3	2	2	2	1	3	4	3	5	5	4	3	5	3	4	4	5	5	4	5	5	5	6	6	6	2	5	3	5	5	6	5	5	4	4	4	4	现状很好
209	1	3	1	1	4	2	2	1	1	1	1	7	7	7	7	7	7	7	7	7	7	7	7	7	7	7	7	7	7	5	5	7	7	7	7	4	7	4	7	7	7	7	7	无
210	1	3	1	1	4	1	1	1	2	2	1	5	5	4	5	4	4	4	4	1	1	1	1	1	1	1	1	6	4	6	4	3	3	3	3	3	5	5	5	4	4	4	4	无
211	1	3	1	2	4	1	1	3	2	1	4	4	3	3	4	2	3	3	2	2	2	2	2	2	2	2	2	5	5	3	3	3	3	3	3	3	3	3	3	5	5	5	5	没有岗位应用的知识
212	1	2	2	1	4	1	1	3	2	2	1	3	2	2	3	2	2	2	2	3	2	7	1	2	1	3	2	7	2	3	3	1	6	2	2	3	1	1	4	1	1	1	1	无
213	2	2	2	1	3	1	1	2	2	1	1	6	5	6	6	5	5	5	6	6	6	6	6	6	6	6	6	6	5	6	6	5	6	6	6	6	6	6	6	6	6	6	6	无
214	2	3	2	1	2	2	2	3	2	3	4	1	1	1	1	1	1	1	1	1	1	1	1	1	1	1	1	1	1	1	1	1	1	1	1	1	1	1	1	1	1	1	1	无
215	2	3	2	1	2	4	4	2	2	1	4	7	7	7	7	7	7	7	7	7	7	7	7	7	1	7	7	7	7	7	7	7	7	7	7	7	7	7	7	7	7	7	7	无
216	2	2	2	1	4	1	1	1	2	1	1	6	6	6	6	6	6	6	6	6	6	6	6	6	6	6	6	6	6	6	6	6	6	6	6	7	7	7	7	6	6	6	6	无
217	2	3	2	1	2	3	3	1	1	1	1	4	2	4	4	3	3	3	3	4	4	4	4	4	3	3	3	7	7	7	4	4	6	6	3	6	5	5	5	4	4	4	4	无
218	2	2	5	1	4	2	1	4	1	1	1	7	7	7	7	7	7	7	7	7	7	7	7	7	7	7	7	7	7	7	7	7	7	7	7	7	7	7	7	7	7	7	7	无
219	2	3	2	1	4	2	1	5	2	1	1	4	3	5	4	4	3	4	4	4	4	4	4	4	4	4	4	4	4	4	4	4	4	4	4	4	4	4	4	4	4	4	4	无
220	2	3	2	1	4	1	1	2	2	1	1	5	5	5	5	5	5	5	5	5	5	5	5	5	5	5	5	5	5	5	5	5	5	5	5	5	5	5	5	5	5	5	5	无
221	2	2	2	1	2	2	2	5	2	3	4	3	4	5	4	5	4	3	3	5	3	4	4	4	4	4	4	4	4	4	4	4	4	4	4	4	4	4	4	4	4	4	4	无
222	2	2	2	1	2	3	3	1	2	1	3	2	4	2	5	3	6	5	2	3	2	3	4	2	3	3	3	2	3	2	2	2	2	2	2	2	2	2	2	2	3	3	2	无
223	2	2	1	1	3	1	1	2	1	2	2	5	6	6	6	6	6	6	6	6	6	6	6	6	6	6	6	6	6	6	6	6	6	6	6	6	6	6	6	5	6	5	5	无
224	2	2	1	1	4	1	1	3	1	1	3	6	6	6	6	6	6	6	6	6	6	6	5	5	5	6	6	5	6	5	5	5	6	6	6	5	6	5	5	5	4	4	4	无
225	2	3	2	1	2	1	1	1	2	1	4	7	1	7	7	5	4	4	4	5	4	4	5	5	6	5	4	6	6	4	4	5	6	5	7	7	7	7	7	7	7	7	7	无
226	2	2	2	1	2	1	1	1	1	1	1	7	7	7	7	7	7	7	7	7	7	7	7	7	7	7	7	7	7	7	7	7	7	7	7	7	7	7	7	7	7	7	7	无
227	2	3	1	1	3	1	1	3	2	1	1	4	4	4	4	4	4	4	4	4	4	4	4	4	4	4	4	3	4	4	4	4	4	4	4	4	4	4	4	4	4	4	4	无
228	1	1	1	2	4	1	1	5	2	1	4	1	1	1	1	1	1	1	1	1	1	1	1	3	2	4	2	6	4	4	3	2	3	2	2	5	5	5	5	4	3	4	4	.
229	2	3	2	1	4	1	1	1	2	1	4	1	1	6	2	3	1	2	4	5	3	3	3	2	2	2	4	5	5	5	4	4	4	4	4	4	4	4	4	4	4	4	4	.
230	1	2	1	1	2	1	1	2	1	1	2	5	6	6	6	6	6	5	6	7	6	5	4	6	6	5	6	6	6	5	5	6	6	5	5	7	7	7	7	4	4	6	4	无
231	1	2	2	1	3	1	1	1	2	1	1	4	4	4	4	4	4	4	4	4	4	4	4	4	4	4	4	4	4	4	4	4	4	4	4	4	4	4	4	4	4	4	4	无
232	2	1	5	1	1	2	2	2	1	1	4	7	7	7	7	7	7	7	7	7	7	7	7	7	7	7	7	7	7	7	7	7	7	7	7	7	7	7	7	7	7	7	7	无
233	2	1	2	1	1	3	2	3	2	1	1	5	5	5	5	5	5	5	5	5	5	5	5	5	5	5	5	5	5	5	5	5	5	5	5	5	5	5	5	5	5	5	5	哈哈哈
234	2	2	5	1	4	3	3	1	2	2	4	2	2	2	2	2	2	2	2	2	2	2	2	2	2	2	2	2	2	2	2	2	2	2	2	2	2	2	2	2	2	2	2	无
235	2	1	3	1	1	1	1	3	2	3	1	6	6	6	6	6	6	6	6	5	5	5	5	4	4	4	4	5	5	5	5	5	5	5	5	4	4	4	4	4	5	4	4	无
236	2	1	2	1	3	3	3	2	1	2	1	6	6	6	6	6	6	6	6	6	6	6	6	6	6	6	6	6	6	6	6	6	6	6	6	6	6	6	6	6	6	6	6	🈚️
237	1	1	3	1	4	1	1	1	1	1	1	4	4	4	4	4	4	4	4	4	4	4	4	4	4	4	4	4	4	4	4	4	4	4	4	4	4	4	4	4	4	4	4	无
238	2	1	5	1	2	3	3	3	2	1	1	5	5	5	5	5	6	5	6	6	5	6	5	5	6	5	5	5	5	6	5	6	5	6	5	6	5	6	5	6	5	6	5	无
239	2	1	1	1	4	1	1	3	2	1	4	7	7	7	7	7	7	7	7	7	7	7	7	7	7	7	7	7	7	7	7	7	7	7	7	7	7	7	7	7	7	7	7	无
240	1	2	2	1	2	2	2	3	1	1	4	4	4	4	4	4	4	4	4	4	4	4	4	4	4	4	4	4	4	4	4	4	4	4	4	4	4	4	4	4	4	4	4	无
241	1	1	2	1	2	3	3	1	1	1	1	7	7	7	7	7	7	7	7	7	7	7	7	7	7	7	7	7	7	7	7	7	7	7	7	7	7	7	7	7	7	7	7	多实践
242	2	1	1	1	2	1	2	1	1	1	1	3	3	3	4	3	3	3	3	3	3	3	3	3	3	3	3	3	3	3	3	3	3	3	3	3	3	3	3	3	3	3	3	无
243	2	1	2	1	4	1	2	2	2	1	1	3	3	7	5	6	6	5	5	6	6	5	5	4	5	4	4	5	4	4	4	4	6	5	5	5	5	5	6	6	6	6	5	无
244	2	1	2	1	2	3	1	3	2	1	1	5	5	5	5	5	5	5	5	5	5	5	5	5	5	5	5	5	5	5	5	5	5	5	5	5	5	5	5	5	5	5	5	无
245	2	1	5	1	2	1	1	3	1	1	1	7	4	7	7	7	7	7	7	7	7	7	7	7	7	7	7	7	7	7	7	7	7	7	7	7	7	7	7	7	7	7	7	无
246	2	1	2	1	2	3	3	2	2	1	3	7	6	6	6	5	2	6	5	4	5	5	5	5	4	5	5	5	5	5	4	4	6	5	5	4	5	6	6	6	6	6	4	无
247	2	1	2	1	4	1	1	1	2	1	4	4	1	5	5	3	3	4	4	5	5	4	5	5	5	4	5	7	5	4	4	1	5	3	4	5	5	7	7	5	4	5	5	无
248	2	1	2	1	2	2	2	3	2	2	1	6	3	5	4	3	4	4	3	3	4	4	5	5	4	4	5	5	4	3	3	3	4	3	4	5	7	6	6	5	4	4	3	无
249	1	1	3	1	2	2	2	5	2	1	1	7	7	7	7	7	7	7	7	7	7	7	7	7	7	7	7	7	7	7	7	7	7	7	7	7	7	7	7	7	7	7	7	无
250	2	3	5	1	2	2	2	1	1	1	1	7	6	6	6	6	6	6	6	5	5	5	5	5	5	5	5	5	5	5	5	6	6	6	6	6	6	6	6	6	6	6	6	可以教点干货 如何找到一份好工作这样的
251	2	1	5	1	2	1	1	1	2	1	4	5	2	5	4	4	4	4	4	4	4	4	4	4	4	4	4	4	4	4	4	2	4	4	4	4	4	4	4	4	4	4	4	无
252	2	1	3	1	3	2	2	2	1	1	1	7	7	7	7	7	7	7	7	7	7	7	7	7	7	7	7	7	7	7	7	7	7	7	7	7	7	7	7	7	7	7	7	无
253	2	1	2	1	3	1	1	4	2	1	1	5	5	6	6	4	3	5	3	5	4	6	5	5	6	5	5	4	4	5	3	2	5	5	5	5	5	5	7	6	5	6	5	希望实践环节优化下
254	2	1	2	1	2	4	1	1	1	1	2	6	6	6	6	5	5	5	5	5	5	5	5	5	5	5	5	5	5	5	5	5	5	5	5	5	5	5	5	5	5	5	5	还不太能掌握知识
255	2	1	5	1	4	2	2	5	2	1	1	4	4	4	5	3	4	5	4	4	4	4	4	4	4	4	4	4	4	4	4	4	4	4	4	4	4	4	4	4	4	4	4	无
256	2	1	3	1	2	3	3	4	2	1	1	6	6	6	6	7	7	7	7	7	7	7	7	6	6	6	6	6	6	6	6	6	6	6	6	6	6	6	6	6	6	6	6	无
257	2	1	5	1	2	2	1	2	1	1	1	4	4	5	5	5	4	4	4	4	4	4	4	4	4	4	6	5	5	5	5	4	4	4	4	4	4	4	4	4	4	4	4	无
258	1	1	3	2	2	2	2	2	1	1	1	7	7	7	7	7	7	7	7	7	7	7	7	7	7	7	7	7	7	7	7	7	7	7	7	7	7	7	7	7	7	7	7	无
259	2	1	3	1	3	2	1	4	2	2	1	4	4	4	4	4	4	4	4	4	4	4	4	4	4	4	4	4	4	4	4	4	4	4	4	4	4	4	4	4	4	4	4	无
260	2	3	2	1	4	1	1	3	2	2	4	5	3	6	4	3	4	5	5	5	3	5	6	4	4	4	4	6	3	5	4	3	5	4	5	5	5	5	5	5	4	5	4	无
261	2	1	3	1	4	1	1	3	2	1	4	6	6	5	6	6	5	4	4	4	4	4	4	4	4	4	4	4	4	4	4	4	4	4	4	4	4	4	4	4	5	4	4	无
262	2	1	3	1	4	2	1	3	2	2	4	3	3	3	3	3	3	3	3	3	3	3	3	3	3	4	4	4	4	4	4	4	4	4	4	4	4	4	4	4	4	4	4	无
263	1	1	2	1	4	1	1	4	1	1	1	6	6	6	6	6	6	6	6	6	6	6	6	4	4	4	4	4	4	4	4	4	4	4	4	6	6	6	6	6	6	6	6	无
264	2	1	2	1	2	2	1	4	1	1	4	4	4	5	6	5	5	6	5	4	4	5	6	5	5	5	5	6	4	4	6	3	6	3	3	5	7	6	6	4	5	5	5	无
265	1	4	1	1	4	4	3	3	1	2	1	2	3	6	2	5	5	5	4	5	5	5	5	5	3	5	5	5	4	5	5	4	4	4	5	7	5	5	7	6	6	6	6	无
266	2	1	1	1	4	1	1	3	1	1	1	4	4	4	4	4	4	4	4	4	4	4	4	4	4	4	4	4	4	4	4	4	4	4	4	4	4	4	4	4	4	4	4	无
267	2	1	1	1	4	1	1	1	2	1	1	5	5	5	5	4	3	4	4	4	4	4	4	4	4	4	4	4	4	4	4	4	4	4	4	4	4	4	4	4	4	4	4	无
268	1	1	3	1	4	1	1	5	2	1	1	6	6	6	6	5	5	5	5	5	5	5	5	5	5	5	5	5	6	5	5	6	6	6	5	2	2	2	2	5	5	5	5	无
269	2	1	1	1	2	2	2	2	2	2	2	4	4	4	4	4	4	4	4	4	4	4	4	4	4	4	4	4	4	4	4	4	4	4	4	4	4	4	4	4	4	4	4	无
270	2	1	3	1	4	1	1	1	2	1	1	7	7	7	7	7	7	7	7	7	7	6	5	5	4	5	5	5	6	6	5	5	5	6	7	6	6	6	6	6	6	5	6	无
271	1	1	1	1	4	2	1	4	2	1	1	4	4	4	4	4	4	4	4	4	4	4	4	4	4	4	4	4	4	4	4	4	4	4	4	4	4	4	4	4	4	4	4	有
272	2	1	2	1	4	1	1	3	2	1	4	2	2	5	3	2	2	4	3	2	5	3	6	5	4	3	2	5	5	5	1	2	2	2	2	5	5	5	5	5	3	2	2	无
273	2	1	1	1	3	1	1	2	2	1	1	6	2	2	4	3	3	3	3	3	4	4	3	5	4	4	4	4	4	4	4	4	4	4	4	4	4	4	4	4	4	4	4	无
274	1	1	1	1	4	3	3	3	2	2	4	4	3	3	3	3	3	3	3	3	3	3	3	3	3	3	3	3	3	3	3	3	3	3	3	3	3	3	3	3	3	3	3	无
275	1	1	1	1	1	4	4	1	1	1	3	7	7	7	7	7	7	7	7	7	7	7	7	7	7	7	7	7	7	7	7	7	7	7	7	7	7	7	7	7	7	7	7	无
276	2	1	3	1	4	1	1	4	2	2	1	5	5	5	5	5	5	6	5	4	4	5	3	6	6	6	5	6	2	2	3	1	3	2	5	3	5	3	6	5	4	5	3	多找点案例来调动积极性
277	1	1	1	2	1	3	2	4	2	3	4	7	7	7	7	7	7	7	7	7	7	7	7	7	7	7	7	7	7	7	7	7	7	7	7	7	7	7	7	7	7	7	7	无
278	2	1	3	1	4	1	1	2	1	1	1	6	6	6	6	6	6	6	6	6	6	6	6	6	6	6	6	6	6	6	6	6	6	6	6	6	6	6	6	6	6	6	6	无
279	1	1	1	1	1	4	4	1	1	1	1	7	7	7	7	7	7	7	7	7	7	7	7	7	7	7	7	7	7	7	7	7	7	7	7	7	7	7	7	7	7	7	7	你的快递包容超级杯吹牛逼都快成农非居然比雪纳瑞*佛osbkdjrnfibdkebxkksbdjfmbskdnjdjssyidicjf嘟嘟嘟地插忒烦了kcu复读覅v开车车检查u肚饿高配版开粗到月底公车上有点哦复试已付款v看粗度诶顾客继续阅读付款v宽度都会觉得羊肉馆杰西卡度精度低覅猝死公v监督岗看场地郭凯赌狗
280	1	1	1	1	4	1	1	5	2	3	4	1	1	3	3	3	3	3	3	3	3	3	3	3	3	3	3	3	3	3	3	5	5	5	5	3	4	4	4	5	4	4	4	无
281	1	2	1	1	2	1	1	3	2	2	1	4	4	4	4	4	4	4	4	5	4	4	4	4	4	4	4	4	4	4	4	4	4	4	4	4	4	4	4	4	4	4	4	无
282	2	1	2	1	2	1	1	1	1	1	1	6	6	6	3	5	3	5	3	5	2	5	2	2	5	2	5	2	5	2	5	2	5	3	5	2	3	5	2	2	5	5	2	无
283	2	1	2	1	4	1	1	3	2	3	1	4	3	4	4	4	4	4	4	4	4	4	4	4	4	4	4	4	4	4	4	4	4	4	4	4	4	4	4	4	4	4	4	无
284	2	1	2	1	3	2	2	1	1	2	1	6	6	6	6	6	6	6	6	6	6	6	6	6	6	6	6	6	6	6	6	6	6	6	6	6	6	6	6	6	6	6	6	很好
285	2	1	2	1	4	1	1	1	2	1	3	7	7	7	7	7	7	7	7	7	7	7	7	7	7	7	7	7	7	7	7	7	7	7	7	7	7	7	7	7	7	7	7	无
286	2	2	1	1	4	1	1	1	1	2	1	5	5	5	5	5	5	5	5	5	5	5	5	5	5	5	5	5	5	5	5	5	5	5	5	5	5	5	5	5	5	5	5	无
287	2	1	2	1	2	2	2	2	1	1	4	7	7	7	7	7	7	7	7	7	7	7	7	4	4	4	4	4	5	5	3	5	4	3	5	5	4	4	5	5	3	5	5	无
288	2	1	5	1	4	1	1	2	2	2	1	5	5	5	5	5	5	5	5	5	5	5	5	5	5	5	5	5	5	5	5	5	5	5	5	5	5	5	5	5	5	5	5	有
289	1	1	2	1	4	2	1	4	2	2	1	4	4	5	5	5	5	4	4	5	5	5	4	5	4	5	4	5	4	4	4	5	5	5	5	5	5	5	5	5	5	3	5	无
290	2	3	3	1	2	2	2	2	2	2	2	6	6	6	6	5	6	5	6	6	6	5	6	5	5	5	5	5	6	5	5	5	5	5	4	4	5	5	4	4	5	5	5	无
291	2	1	2	1	4	1	1	1	1	1	1	7	7	7	7	5	7	7	7	6	6	7	7	7	7	5	6	6	7	7	7	7	7	7	7	7	7	7	6	6	6	7	7	无
292	2	2	2	2	2	4	2	2	2	2	2	7	7	7	7	7	7	7	7	7	7	7	7	7	7	7	7	7	7	7	7	7	7	7	7	7	7	7	7	7	7	7	7	无
293	1	1	2	1	2	1	2	4	1	2	1	1	5	4	1	4	1	1	5	1	5	5	4	1	1	5	5	1	5	5	5	5	1	5	1	1	5	5	1	1	1	1	1	无
294	1	2	5	2	2	2	1	5	2	2	4	5	5	4	5	4	5	4	5	4	4	5	4	4	5	4	5	4	3	5	4	4	5	3	5	3	5	4	3	3	4	3	4	无
295	1	1	2	1	4	1	1	3	2	1	1	7	7	7	7	7	7	7	7	7	7	7	7	7	7	7	7	7	7	7	7	7	7	7	7	7	7	7	7	7	7	7	7	无
296	2	1	3	1	2	2	2	3	2	1	1	7	5	4	6	6	6	5	7	7	7	5	6	7	6	5	7	7	6	6	7	7	6	5	7	6	7	6	7	7	5	6	6	无
297	2	3	3	1	4	1	3	4	1	2	3	4	4	4	4	4	4	4	4	4	4	4	4	4	4	4	4	4	4	4	4	4	4	4	4	4	4	4	4	4	4	4	4	无
298	2	1	2	1	2	2	3	3	2	1	1	5	5	5	5	5	5	5	5	5	5	5	5	5	5	5	5	5	5	5	5	5	5	5	5	5	5	5	5	5	5	5	5	无
299	1	1	1	1	4	1	1	2	2	3	4	2	2	2	2	2	2	2	2	2	2	2	2	2	2	2	2	3	3	3	3	3	3	3	3	3	3	4	4	4	4	4	4	无
300	1	1	5	1	4	1	1	4	2	2	1	1	1	1	1	1	1	3	1	1	1	1	1	3	5	3	4	3	4	3	4	3	4	3	2	1	3	1	4	1	6	1	5	无
301	2	1	3	1	2	1	1	1	1	1	1	4	4	3	3	3	3	3	4	3	3	3	3	3	3	3	3	3	3	3	3	3	4	4	4	4	4	4	4	4	4	4	4	无
303	1	1	2	1	4	2	1	5	2	3	4	1	1	1	1	1	1	1	1	1	1	1	1	1	1	1	1	1	1	1	1	1	1	1	1	1	1	1	1	1	1	1	1	无
304	2	1	2	1	2	2	2	3	1	1	1	6	6	6	6	5	5	5	5	5	5	5	5	5	5	5	5	5	5	5	5	5	5	5	5	5	5	5	5	5	5	5	5	无
305	2	1	2	1	4	1	1	2	1	1	4	3	5	5	4	5	4	4	5	5	5	3	5	5	3	5	3	5	3	4	5	4	5	6	5	4	5	5	4	5	4	5	5	无
306	2	3	3	1	4	1	1	2	1	1	3	4	4	4	4	4	4	4	4	4	4	4	4	4	4	4	4	4	4	4	4	4	4	4	4	4	4	4	4	4	4	4	4	无
307	2	3	3	1	2	1	2	1	2	1	3	7	7	7	7	7	7	7	7	7	7	7	7	7	7	7	7	7	7	7	7	7	7	7	7	7	7	7	7	7	7	7	7	无
308	2	3	3	1	2	3	1	5	1	2	3	3	4	3	3	3	3	3	3	3	3	3	3	3	3	3	2	5	4	4	2	1	2	3	3	4	3	4	3	2	3	3	3	无
309	1	1	3	1	4	2	1	5	2	2	3	5	5	5	5	5	5	5	5	5	5	5	5	5	5	5	5	5	5	5	5	5	5	5	5	5	5	5	5	5	5	5	5	无
310	2	3	3	1	2	3	3	1	1	2	1	5	5	5	5	5	4	5	5	5	4	5	5	5	4	5	5	5	4	5	5	5	4	5	5	5	4	5	5	6	4	5	5	好
311	2	1	5	2	2	2	3	1	1	1	4	7	7	7	7	7	7	7	7	7	7	7	7	7	7	7	7	7	7	7	7	7	7	7	7	7	7	7	7	7	7	7	7	无
312	1	2	3	1	4	1	1	5	2	2	1	6	4	6	7	4	6	5	5	5	5	5	4	6	5	4	4	4	5	4	4	5	4	4	5	5	4	5	4	4	5	4	4	无
313	2	1	2	1	3	2	2	1	2	1	1	7	7	7	7	7	7	7	7	7	7	7	7	7	7	7	7	7	7	7	7	7	7	7	7	7	7	7	7	7	7	7	7	无
314	1	1	3	1	2	2	2	5	2	3	4	4	4	4	4	4	4	4	4	4	4	4	4	4	4	4	4	4	4	4	4	4	4	4	4	4	4	4	4	4	4	4	4	无
315	2	3	3	1	4	1	1	5	2	3	4	7	7	7	7	7	7	7	7	7	7	7	7	7	7	7	7	7	7	7	7	1	7	1	1	7	7	7	7	7	7	7	7	无
316	2	1	2	1	4	2	1	1	2	1	1	4	3	5	5	5	4	4	5	5	4	4	4	4	4	4	4	4	4	4	4	4	4	4	4	4	4	4	4	4	4	4	4	无
317	1	1	5	1	4	1	1	5	2	3	4	1	1	3	1	3	3	3	3	1	3	3	3	3	3	3	3	3	1	2	3	3	3	1	1	3	3	3	3	3	3	3	3	无
318	1	1	2	1	2	3	2	3	1	2	2	7	7	7	7	7	7	7	7	7	7	7	7	7	7	7	7	7	7	7	7	7	7	7	7	7	7	7	7	7	7	7	7	无
319	2	1	2	1	2	2	2	5	2	1	2	5	5	5	5	5	5	5	5	4	5	5	5	5	5	5	5	6	5	5	5	5	5	5	5	5	5	5	5	5	5	5	5	无
320	2	1	2	1	3	1	1	5	2	2	4	4	2	4	4	4	3	3	3	3	3	3	3	3	3	3	3	3	3	3	3	3	3	3	3	3	3	3	3	3	3	3	3	无
321	1	1	2	1	2	2	2	4	2	1	3	6	6	7	7	7	7	6	7	7	7	7	7	7	7	6	7	7	7	6	7	7	6	7	7	7	7	7	7	7	7	6	7	增加有关职业规划的课程
322	2	1	2	1	3	2	2	4	2	2	1	5	5	5	5	5	5	5	5	5	5	5	5	5	5	5	5	5	5	5	5	5	5	5	5	5	5	5	5	5	5	5	5	无
323	1	3	3	1	2	3	1	3	2	2	1	6	6	6	6	6	6	6	6	6	6	6	6	6	6	6	6	6	6	6	6	6	6	6	6	6	6	6	6	6	6	6	6	无
324	1	1	3	1	2	3	3	1	1	1	4	7	7	7	7	7	7	7	7	7	7	7	7	7	7	7	7	7	7	7	7	7	7	7	7	7	7	7	7	7	7	7	7	无
325	2	3	3	1	4	2	2	1	1	1	3	5	5	5	5	5	5	5	5	5	5	5	5	5	5	5	5	5	5	5	5	5	5	5	5	5	5	5	5	5	5	5	5	没用，少上课
326	1	1	1	1	1	1	2	3	1	1	4	7	7	7	7	7	7	7	7	7	7	7	7	7	7	7	7	7	7	7	7	7	7	7	7	7	7	7	7	7	7	7	7	无
327	1	1	3	1	4	1	1	1	1	1	1	3	3	3	3	3	3	3	3	3	3	3	3	3	3	3	3	3	3	3	3	3	3	3	3	3	3	3	3	3	3	3	3	为我提供一些实习经历
328	1	1	2	1	2	2	2	1	1	1	1	7	7	7	7	7	7	7	7	7	7	7	7	7	7	7	7	7	7	7	7	7	7	7	7	7	7	7	7	7	7	7	7	无
329	1	1	3	1	2	3	3	2	1	2	4	6	2	7	7	7	7	7	7	7	6	6	6	7	1	4	4	6	6	5	6	2	6	5	5	6	7	7	7	4	6	6	5	无
330	2	3	3	1	4	1	1	2	1	3	3	4	4	4	4	4	4	4	4	4	4	4	4	4	4	4	4	4	4	4	4	4	4	4	4	4	4	4	4	4	4	4	4	无
331	2	1	3	1	4	2	1	2	2	2	2	4	4	4	4	4	4	4	4	4	4	4	4	4	4	4	4	4	4	4	4	4	4	4	4	4	4	4	4	4	4	4	4	无
332	1	1	2	1	2	2	2	5	2	2	1	4	4	4	4	4	4	4	4	4	4	4	4	4	4	4	4	4	4	4	4	4	4	4	4	4	4	4	4	4	4	4	4	无
333	1	1	2	1	4	1	1	1	1	1	3	7	7	7	7	6	7	7	6	7	7	4	2	7	7	6	7	7	3	3	3	5	4	6	6	2	2	3	4	5	5	6	7	无
334	1	1	2	1	4	3	3	5	2	3	1	7	7	7	7	7	7	7	7	7	7	7	7	7	7	7	7	7	7	7	7	7	7	7	7	7	7	7	7	7	7	7	7	没有
335	1	1	5	1	3	2	1	5	2	2	3	4	2	7	7	1	1	1	4	1	6	5	4	2	5	5	2	5	5	5	2	2	5	2	2	3	5	2	4	1	1	1	1	无
336	2	3	3	1	4	1	1	3	2	1	3	4	4	4	4	4	4	4	4	6	6	6	6	4	4	4	4	4	4	4	4	4	4	4	4	4	4	4	4	4	4	4	4	无
337	2	1	3	1	4	1	1	1	2	2	1	4	5	4	4	6	5	5	4	4	4	3	5	5	5	4	3	5	4	5	4	5	5	5	5	6	7	4	6	7	5	4	3	更加丰富点
338	2	1	2	1	4	3	1	4	2	1	3	4	4	4	4	4	4	4	4	4	4	4	4	4	4	4	4	4	4	5	4	4	4	4	4	4	4	4	4	4	4	4	4	无
339	2	3	3	1	4	1	2	4	1	2	2	4	4	4	4	4	4	4	4	4	4	4	4	4	4	4	4	4	4	4	4	4	4	4	4	4	4	4	4	4	4	4	4	无
340	2	1	3	1	4	1	1	5	1	1	3	1	1	3	3	3	3	3	3	3	3	3	3	3	3	3	3	3	3	3	3	3	3	3	3	3	3	3	3	3	3	3	3	。
341	1	1	3	1	2	1	1	3	2	1	3	7	7	7	7	7	7	7	7	7	7	7	7	7	7	7	7	7	7	7	7	7	7	7	7	7	7	7	7	7	7	7	7	无
342	2	1	2	1	2	2	2	2	1	1	3	4	4	4	4	4	4	4	4	4	4	4	4	4	4	4	4	4	4	4	4	4	4	4	4	4	4	4	4	4	4	4	4	无
343	1	1	5	1	3	2	2	2	1	2	1	6	5	5	5	5	6	5	4	5	6	5	5	5	5	6	7	6	6	6	5	5	3	5	4	5	5	6	5	5	6	5	5	没有
344	2	2	2	1	2	2	3	5	2	2	1	4	4	4	4	4	4	4	4	4	4	4	4	4	4	4	4	4	4	4	4	4	4	4	4	4	4	4	4	4	4	4	4	无
345	2	1	3	1	4	1	1	3	2	1	4	5	6	5	6	6	7	5	7	6	6	6	6	5	6	6	6	7	7	7	6	6	6	6	6	5	6	5	6	6	6	7	5	希望可以有系统的教程
346	1	1	2	1	2	3	2	4	2	3	4	1	1	1	1	1	1	1	1	1	1	1	1	1	1	1	1	1	1	1	1	1	1	1	1	1	1	1	1	1	1	1	1	无
347	2	1	3	1	4	1	1	1	2	1	4	7	1	7	7	7	7	7	7	7	7	7	7	7	7	7	7	7	7	7	7	3	7	4	4	3	2	2	6	5	5	5	5	无
348	1	1	3	2	2	2	2	4	2	2	4	6	6	6	6	6	6	6	6	6	6	6	6	6	6	6	6	6	6	6	6	6	6	6	6	6	6	6	6	6	6	6	6	无
349	2	1	2	1	2	2	1	2	1	1	1	7	7	7	7	7	7	7	7	7	7	7	7	7	7	7	7	7	7	7	7	7	7	7	7	7	7	7	7	7	7	7	7	无
350	2	3	3	1	4	1	1	2	2	1	3	5	5	5	5	3	5	5	5	5	5	5	5	5	5	5	5	5	5	5	5	5	5	5	5	5	5	5	5	5	5	5	4	大多数没有实质性帮助
351	2	1	2	1	2	2	2	3	1	1	1	4	4	4	4	4	4	4	4	4	4	4	4	4	4	4	4	4	4	4	4	4	4	4	4	4	4	4	4	4	4	4	4	无
352	2	1	2	1	2	1	3	4	2	1	4	4	2	2	7	5	4	3	4	7	3	4	3	4	6	4	5	3	7	2	1	1	1	1	1	1	1	1	1	1	1	1	1	无
353	2	1	3	1	4	2	2	5	2	2	4	3	3	4	6	4	3	3	3	3	3	3	3	3	3	5	3	5	3	5	3	3	5	4	3	4	2	5	5	4	3	5	2	无
354	2	1	3	1	1	2	2	1	2	1	4	3	3	3	3	3	3	3	3	3	3	3	3	3	3	3	3	3	3	3	3	3	3	3	3	3	3	3	3	5	5	5	5	无
355	2	1	3	1	3	1	1	2	2	2	2	4	3	4	5	4	4	5	3	3	4	5	4	5	3	4	5	4	4	3	2	2	4	3	4	5	5	4	6	4	2	3	3	无
356	2	1	2	1	2	2	2	4	2	2	1	7	7	7	7	7	7	7	7	7	7	7	7	7	7	7	7	7	7	7	7	7	7	7	7	7	7	7	7	7	7	7	7	无
357	2	1	5	1	1	4	4	3	1	2	4	7	4	5	5	4	5	6	3	4	4	6	5	6	1	7	7	4	4	4	3	3	4	5	2	5	3	5	5	6	3	5	5	无
358	1	1	2	1	4	2	2	4	2	1	4	5	4	6	5	6	6	5	6	5	6	5	6	5	7	5	6	5	6	6	5	5	6	6	6	6	6	6	6	6	6	6	6	无
359	2	1	5	1	2	2	2	2	1	2	1	5	5	5	5	5	5	5	5	5	5	5	5	5	5	5	5	5	5	5	5	5	5	5	5	5	5	5	5	5	5	5	5	wu
360	1	1	2	1	2	3	3	2	1	3	2	4	4	4	4	4	4	4	4	4	4	4	4	4	4	4	4	4	4	4	4	4	4	4	4	4	4	4	4	4	4	4	4	无
361	1	1	2	1	1	1	1	5	2	2	4	5	5	5	5	4	4	4	4	4	4	4	4	4	4	4	4	3	4	3	4	5	5	5	5	5	2	2	5	5	3	5	3	无
362	2	1	5	1	4	1	1	2	1	1	1	6	6	5	6	6	6	6	6	6	6	6	6	6	6	6	6	6	6	6	6	6	6	6	6	6	5	6	6	6	6	6	6	无
363	2	1	3	1	3	1	1	2	1	1	4	5	5	5	5	5	5	5	5	5	5	5	5	5	5	5	5	5	4	4	5	4	5	5	6	5	4	5	5	5	5	5	5	应该在大三就让我实习
364	2	1	2	1	4	2	2	1	1	2	4	6	5	5	7	7	6	7	6	6	5	5	5	6	5	5	5	6	5	5	5	5	6	4	5	5	5	5	5	5	5	5	5	无
365	1	1	5	1	4	1	1	1	2	3	4	7	7	7	7	7	7	7	7	7	7	7	7	7	7	7	7	7	7	7	7	7	7	7	7	7	7	7	7	7	7	7	7	无
366	1	1	3	1	4	1	2	3	2	3	4	7	7	7	7	7	7	7	7	7	7	7	7	7	7	7	7	7	7	7	7	7	7	7	7	7	7	7	7	7	7	7	7	无
367	2	1	3	2	2	2	3	2	2	1	1	6	6	6	5	5	5	5	3	5	5	5	5	5	5	5	5	4	5	5	5	4	4	5	5	5	5	5	5	5	5	5	5	无
368	2	1	3	2	2	2	3	4	2	3	1	4	4	4	4	4	4	4	4	4	4	4	4	4	4	5	5	4	6	5	5	5	6	6	5	5	5	5	4	4	6	6	6	无
369	2	1	3	1	3	1	1	3	2	1	2	7	7	7	7	7	7	7	7	7	7	7	7	7	7	7	7	7	7	7	7	7	7	7	7	7	7	7	7	7	7	7	7	无
370	1	1	1	1	3	2	1	1	1	1	1	5	5	5	5	5	5	5	5	5	5	5	5	5	5	5	5	5	5	5	5	5	5	5	5	5	5	6	6	6	6	6	6	无
371	2	1	1	1	4	1	1	2	1	1	1	5	3	4	3	3	2	3	3	4	3	4	3	4	4	4	4	4	4	4	3	3	4	4	4	3	3	3	3	3	3	3	3	无
372	2	1	5	1	4	1	1	4	2	3	1	3	4	2	4	2	4	4	3	3	5	3	3	3	5	3	3	3	4	3	3	4	4	4	3	3	4	4	3	4	3	4	3	无
373	2	1	1	1	4	3	3	5	2	2	4	7	5	3	4	5	3	5	3	5	3	3	5	5	3	3	5	5	3	5	5	3	3	3	5	6	3	5	5	5	2	5	3	无
374	2	1	1	1	4	1	1	3	2	3	2	4	4	2	4	2	3	3	3	3	3	3	3	3	4	4	3	4	3	3	4	4	3	5	3	5	4	3	3	4	3	4	4	没有
375	1	1	5	1	4	1	1	3	2	1	4	2	2	2	4	3	3	3	3	3	3	3	3	3	4	3	3	5	3	3	4	3	3	3	3	4	3	3	5	3	3	4	3	无
376	1	1	3	1	2	2	2	2	1	1	4	3	4	3	4	3	3	3	3	3	3	3	3	3	3	3	3	6	3	4	4	4	3	3	3	3	3	3	3	3	3	3	3	无
377	1	2	3	1	4	2	1	4	2	1	4	7	4	7	7	4	4	4	6	6	5	6	5	5	5	5	5	7	6	7	6	4	5	5	4	6	6	7	7	5	5	6	5	无
378	2	2	5	1	3	1	1	2	2	3	1	3	3	3	3	3	3	3	3	3	3	3	3	3	3	3	3	3	3	3	3	3	3	3	3	3	3	3	3	3	3	3	3	无
379	2	1	2	1	4	1	1	1	2	2	1	1	1	3	2	3	3	3	3	3	3	3	3	3	3	3	3	3	3	3	3	3	3	3	3	3	3	3	3	3	3	3	3	无
380	2	1	2	1	3	1	1	3	2	2	4	4	4	4	4	4	4	4	4	4	4	4	4	4	4	4	4	4	4	4	4	4	4	4	4	4	4	4	4	4	4	4	4	1
381	2	1	3	1	2	2	1	3	2	1	1	6	6	6	6	6	6	6	6	6	6	6	6	6	6	6	6	6	6	6	6	6	6	6	6	6	6	6	6	6	6	6	6	无
382	2	1	3	1	4	2	2	4	2	1	1	3	3	3	3	3	3	3	3	3	3	3	3	3	3	3	3	3	3	3	3	3	3	3	3	3	3	3	3	3	3	3	3	无
383	2	1	2	1	2	1	2	3	1	1	1	4	4	4	4	4	4	4	4	4	4	4	4	4	4	4	4	4	4	4	4	4	4	4	4	4	4	4	4	4	4	4	4	无
384	2	1	2	1	4	1	1	2	2	3	4	3	3	3	3	4	3	5	4	3	6	5	5	5	5	4	6	4	5	4	5	4	5	5	4	5	5	5	6	4	4	4	5	无
385	1	1	1	1	2	3	2	4	1	1	1	7	1	5	4	2	2	4	4	4	4	4	4	4	4	4	4	4	4	4	4	4	4	4	4	4	4	4	4	4	4	4	4	无
386	2	1	2	1	4	1	1	1	2	1	1	5	6	7	5	5	6	6	7	5	6	5	6	5	6	5	6	5	6	5	6	5	6	5	6	5	6	5	5	5	6	5	6	无
387	2	1	3	1	2	1	1	1	1	1	1	7	4	5	6	6	6	5	6	4	5	6	6	4	5	4	6	7	6	6	7	1	2	2	6	6	7	7	7	6	6	6	7	希望提供一些真实具体的就业案例
388	2	1	5	1	1	2	2	2	1	1	4	5	5	6	5	5	5	5	5	5	5	5	5	6	5	6	6	5	5	5	5	5	5	5	5	6	5	5	5	5	5	5	5	无
389	2	1	3	1	2	3	4	2	2	2	2	4	5	5	5	5	5	5	5	4	4	4	4	5	4	4	5	5	5	5	5	3	6	6	5	6	5	5	5	3	3	3	3	无
390	2	1	2	1	1	3	2	1	2	1	4	4	4	5	5	5	5	5	5	7	6	4	4	6	6	6	6	6	4	5	5	4	7	4	4	4	4	4	4	4	4	4	4	无
391	2	1	3	1	4	2	2	1	2	1	4	3	3	3	3	3	3	3	3	3	3	3	3	3	3	3	3	3	3	3	3	3	3	3	3	3	3	3	3	3	3	3	3	好
392	2	1	3	1	4	1	1	3	2	2	1	5	3	4	5	4	3	4	5	5	4	4	5	5	6	4	5	5	3	5	4	3	4	5	5	5	4	4	6	5	5	5	5	暂无
393	1	1	5	1	1	4	4	2	2	1	3	7	7	7	7	7	7	7	7	7	7	7	7	7	7	7	7	7	7	7	7	7	7	7	7	7	7	7	7	7	7	7	7	无
394	2	1	5	1	3	1	2	1	2	2	2	3	3	3	3	4	3	3	3	4	4	5	5	5	4	3	3	4	3	3	3	3	3	3	3	3	3	3	3	3	3	3	4	无
395	1	1	3	1	4	3	3	3	1	1	1	7	7	7	7	7	7	7	7	7	7	7	7	7	7	7	7	7	7	7	7	7	7	7	7	7	7	7	7	7	7	7	7	无
396	1	1	1	1	4	2	2	2	2	3	4	1	1	1	1	1	1	1	1	1	4	6	7	7	7	4	4	7	4	2	7	3	1	1	1	4	4	4	4	4	4	4	4	无
397	1	1	2	1	1	2	3	5	2	1	1	3	2	3	3	3	3	3	3	3	3	3	3	3	3	3	3	3	3	4	3	3	3	3	3	3	3	3	4	3	3	3	3	无
398	2	2	5	1	4	2	2	4	2	2	1	6	5	5	5	4	5	5	5	4	5	5	5	5	5	5	5	5	5	5	5	4	4	5	4	5	5	5	5	5	5	5	5	无
399	1	1	5	1	2	3	3	5	1	3	1	3	3	3	3	3	3	3	3	3	3	3	3	3	3	3	3	3	3	3	3	3	3	3	3	3	3	3	3	3	3	3	3	无
400	2	1	5	1	4	1	1	3	2	1	1	4	2	2	3	3	3	3	3	2	3	3	3	3	3	3	3	3	3	3	3	2	2	2	2	3	2	2	3	2	2	3	3	无
401	1	1	1	2	4	2	1	2	2	1	1	6	6	5	5	5	6	6	5	5	6	6	6	5	6	5	5	5	5	6	6	5	4	5	6	6	6	4	5	6	5	6	5	无
402	2	1	3	1	4	1	1	2	2	1	4	7	4	7	4	7	7	7	7	7	7	6	7	6	6	7	6	6	6	7	6	6	7	6	6	7	7	6	7	7	6	6	7	没有
403	2	1	3	1	4	1	1	4	2	2	4	4	4	4	4	4	4	3	4	4	4	3	4	4	3	3	4	4	4	3	4	4	4	3	4	4	3	4	4	4	4	3	4	没有建议
404	2	1	2	1	4	2	2	3	1	1	1	7	3	7	7	4	4	4	7	7	7	7	7	7	7	7	7	7	7	7	7	7	7	7	7	7	7	7	7	7	7	7	7	无
405	2	1	3	1	3	3	3	5	2	2	4	7	7	7	7	7	7	7	7	7	7	7	7	7	7	7	7	7	7	7	7	6	7	6	7	6	5	6	7	7	6	7	6	没有
406	2	1	3	1	4	1	1	3	2	1	1	5	5	5	5	5	4	6	4	6	5	6	5	6	5	4	6	6	6	7	6	5	4	5	5	6	6	5	5	6	5	6	4	无
407	2	1	2	1	2	3	2	3	2	1	1	5	5	4	6	4	5	4	5	5	5	4	5	5	4	5	6	5	6	5	4	4	5	4	4	5	5	5	5	5	5	5	5	无
408	2	1	2	1	2	1	1	4	2	1	4	7	7	7	7	7	7	7	7	7	7	7	7	3	3	3	3	7	7	7	7	7	7	7	7	7	7	7	7	7	7	7	7	无
409	2	1	5	1	4	1	1	4	2	2	1	3	3	3	4	2	2	2	2	3	2	3	2	3	2	4	4	3	2	3	3	3	3	4	3	4	3	4	3	3	4	3	3	无
410	2	1	3	1	2	1	1	2	2	1	4	4	2	5	5	4	4	4	5	5	5	5	5	4	4	4	4	5	4	5	4	3	5	5	5	6	6	6	6	6	4	6	4	无
411	1	1	1	2	4	2	2	2	2	1	1	5	5	5	5	4	5	5	4	4	5	4	4	4	4	5	5	4	4	5	4	3	4	4	4	4	4	5	5	4	5	4	4	无
412	1	1	2	1	4	2	1	4	2	1	1	7	4	5	5	7	5	6	4	7	5	4	5	7	6	5	5	5	6	7	7	7	7	7	7	6	7	6	6	7	7	6	7	早点取消晚自习
413	1	1	2	1	3	1	1	4	2	1	1	6	6	6	6	6	6	6	6	6	6	6	6	6	6	6	6	6	6	6	6	6	6	6	6	6	6	6	6	6	6	6	6	无
414	2	1	2	1	2	2	1	2	1	1	3	7	5	6	6	6	6	6	6	6	6	6	6	6	6	6	6	6	6	6	6	6	6	6	6	6	6	6	6	6	6	6	6	无
415	2	1	1	2	4	1	1	3	2	3	4	1	2	1	1	1	1	1	1	1	1	1	1	1	1	1	1	1	1	1	1	1	1	1	1	1	1	1	1	1	1	1	1	毫无帮助，形式主义
416	2	1	3	1	4	1	1	3	1	1	1	3	3	3	4	4	3	4	2	2	3	3	3	4	2	4	3	7	4	5	4	3	4	5	6	4	3	4	4	3	4	3	3	实习时间比较少。
417	2	3	2	1	1	2	3	1	2	2	4	6	5	6	5	6	5	6	5	6	5	6	5	6	5	6	5	6	5	6	5	6	7	6	5	6	5	6	5	6	5	6	5	无
418	1	3	3	1	4	1	1	1	1	1	3	7	7	6	5	5	4	5	6	6	6	6	6	5	4	4	4	5	5	5	5	3	6	6	4	5	5	5	6	5	5	6	6	职业本科过于强调实践性，对于考研等规划强调性不足
419	2	1	3	1	4	1	1	1	2	2	1	7	7	7	7	7	7	7	7	7	7	7	7	7	7	7	7	7	7	7	7	7	7	7	7	7	7	7	7	7	7	7	7	无
420	2	1	2	1	2	3	3	1	1	2	2	5	5	5	5	4	4	4	4	4	4	4	4	4	4	4	4	4	4	4	4	4	4	4	4	4	4	4	4	4	4	4	4	无
421	2	1	2	1	4	1	1	1	1	1	4	5	2	6	6	6	6	6	6	5	6	5	5	5	6	5	5	6	5	5	4	3	5	5	5	5	5	5	5	5	5	5	5	暂时没有
422	2	1	5	1	4	1	1	1	2	1	4	5	5	5	5	5	5	5	5	5	5	5	5	5	5	5	5	5	5	5	5	5	5	5	5	5	5	5	5	5	5	5	5	无
423	2	1	2	1	2	2	2	1	1	1	1	4	4	4	4	4	4	4	4	4	4	4	4	4	4	4	4	4	4	4	4	4	4	4	4	4	4	4	4	4	4	4	4	无
424	1	1	5	1	2	1	1	5	2	1	1	7	7	7	7	7	7	7	7	7	7	7	7	7	7	7	7	7	7	7	7	7	7	7	7	7	7	7	7	7	7	7	7	无
425	2	1	2	1	3	1	1	3	2	1	1	5	4	5	5	5	3	3	3	3	3	3	5	3	3	4	4	5	3	4	5	3	3	3	3	4	4	3	4	4	4	4	4	无
426	2	1	5	1	4	2	1	2	2	2	1	3	2	4	3	3	2	3	4	3	3	3	3	3	3	3	4	4	3	3	2	3	4	4	4	7	6	7	7	5	4	4	3	无
427	2	1	2	1	4	1	1	2	2	1	4	4	1	4	5	5	5	4	3	5	5	4	5	4	4	4	4	7	5	7	4	4	5	3	4	6	6	5	5	4	4	7	4	无
428	2	2	2	1	3	2	2	4	2	1	1	4	3	5	5	6	5	4	4	3	5	4	5	5	4	5	4	4	5	6	4	5	4	5	6	6	5	5	6	6	5	6	5	无
429	1	1	1	1	1	1	1	1	1	1	2	4	4	4	4	4	4	4	4	4	4	4	4	4	4	4	4	4	4	4	4	4	4	4	4	4	4	4	4	4	4	4	4	无
430	2	1	2	1	2	1	1	5	2	1	4	4	4	4	4	4	4	4	4	4	4	4	4	4	4	4	4	4	4	4	4	4	4	4	4	4	4	4	4	4	4	4	4	无
431	2	1	5	1	4	2	1	1	1	1	1	4	2	2	4	3	3	3	2	2	2	1	2	2	1	1	5	4	3	3	3	3	3	4	4	4	4	5	4	4	3	4	3	无
432	2	1	3	1	3	2	1	3	2	1	1	4	4	4	4	4	4	4	4	4	4	4	4	4	4	4	4	4	4	4	4	4	4	4	4	4	4	4	4	4	4	4	4	多实践，不想在教室。
433	2	3	2	1	4	1	1	1	2	2	1	6	4	6	6	6	6	6	6	6	6	6	6	6	6	6	6	6	6	6	6	6	6	6	6	6	6	6	6	6	6	6	6	。
434	1	2	1	1	4	1	1	1	2	2	1	7	7	7	7	7	7	7	7	7	7	7	7	7	7	7	7	7	7	7	7	7	7	7	7	7	7	7	7	7	7	7	7	无
435	2	1	3	1	3	1	2	3	2	2	1	6	6	6	6	5	6	6	6	6	6	6	6	6	6	6	6	7	7	7	7	7	7	7	7	7	7	7	7	7	7	7	7	无
436	2	3	2	1	3	1	1	1	2	1	1	5	5	5	5	5	5	5	5	5	5	5	5	5	5	5	5	5	5	5	5	6	5	5	5	6	5	5	5	6	6	5	5	无
437	2	1	1	1	2	1	1	3	2	1	4	7	7	7	7	7	7	7	7	7	7	7	7	7	7	7	7	7	7	7	7	7	7	7	7	7	7	7	7	7	4	6	7	无
438	2	1	3	1	3	1	1	1	1	1	2	5	5	6	6	6	6	6	6	6	6	6	6	6	5	5	6	6	5	5	4	5	5	6	6	6	6	5	5	6	5	6	6	无
439	2	1	1	1	1	1	1	2	1	2	1	3	3	4	4	6	6	6	4	3	5	4	6	5	4	4	4	4	3	5	3	3	3	5	4	5	5	5	5	4	4	5	5	暂无
440	1	1	1	1	3	2	1	3	1	1	1	3	3	3	3	3	3	3	3	4	5	3	5	3	5	2	5	3	5	3	5	3	5	3	6	2	5	3	5	2	4	2	5	无
441	2	1	3	1	2	3	2	1	1	1	2	5	5	5	5	5	5	5	5	5	5	5	5	5	4	4	5	5	5	6	6	5	6	5	6	5	5	5	6	6	6	6	6	无
442	1	2	2	1	2	1	2	2	2	1	1	7	7	7	7	7	7	7	7	7	7	7	7	7	7	7	7	7	7	7	7	7	7	7	7	7	7	7	7	7	7	7	7	无
443	2	1	2	2	2	2	2	5	1	2	4	2	2	5	4	4	7	7	3	3	2	3	4	4	4	4	4	3	3	3	3	3	3	3	3	3	3	3	3	3	3	3	3	无
444	2	1	3	1	4	1	1	1	1	1	1	3	3	3	3	3	3	3	3	3	3	3	3	3	3	3	3	3	3	3	3	3	3	3	3	3	3	3	3	6	6	6	6	无
445	1	1	1	1	3	1	1	5	2	3	4	6	6	5	4	4	4	3	3	3	4	3	3	4	3	4	3	3	4	3	3	3	4	3	3	3	4	3	3	3	4	4	3	无
446	1	1	1	1	3	1	1	5	2	2	4	2	2	2	2	2	2	2	2	2	2	2	2	2	2	2	2	2	2	2	2	2	2	2	2	2	2	2	2	2	2	2	2	暂时没有
447	2	1	2	1	3	2	2	2	2	1	4	3	2	4	3	3	4	3	4	4	3	4	3	4	3	4	3	4	3	4	3	4	3	4	3	4	3	4	3	3	4	3	4	无
448	2	1	3	1	2	1	1	2	1	1	1	5	6	4	7	5	5	5	5	6	5	5	5	5	5	5	5	7	5	5	5	2	5	5	5	4	4	4	7	7	7	7	4	社会上依旧缺少对于党务工作专业的相关指导
449	1	1	2	1	4	1	1	4	2	1	4	5	3	6	5	5	3	6	4	5	7	3	5	5	6	3	4	7	3	7	7	7	7	2	4	6	5	6	5	7	5	5	6	取消晚自习
450	2	1	3	1	4	3	1	1	1	1	4	3	1	2	7	4	3	5	6	5	5	5	5	2	2	2	3	3	3	3	3	1	4	4	4	5	7	7	7	7	7	6	7	无
451	2	1	2	1	3	2	3	2	2	2	1	7	4	5	5	7	7	4	7	4	7	7	7	7	7	7	7	7	7	7	7	7	7	7	7	4	4	6	6	5	5	7	7	没有
452	1	1	5	1	4	1	1	2	1	1	4	7	7	7	7	7	7	7	7	7	7	7	7	7	7	7	7	7	7	7	7	7	7	7	7	7	7	7	7	7	7	7	7	无
453	1	1	1	1	4	1	1	5	2	3	4	1	1	1	1	1	1	1	1	1	1	1	1	1	1	1	1	1	1	1	1	1	1	1	1	1	1	1	1	1	1	1	1	无
454	2	1	3	1	3	2	2	1	1	1	1	7	7	7	7	7	7	7	7	7	7	7	7	7	7	7	7	7	7	7	7	7	7	7	7	7	7	7	7	7	7	7	7	无
455	2	1	1	1	2	2	1	1	1	3	1	4	2	2	4	6	2	3	2	1	1	1	1	1	1	2	3	3	2	2	2	1	1	1	1	1	1	1	3	1	1	3	3	无
456	2	3	2	1	2	2	2	5	2	2	4	7	7	7	7	7	7	7	7	7	7	7	7	7	7	7	7	7	7	7	7	7	7	7	7	7	7	7	7	7	7	7	7	无
457	2	4	1	1	4	1	1	2	1	1	4	7	7	6	7	7	6	6	6	6	6	7	7	7	7	6	6	7	6	7	6	7	7	7	7	7	6	7	6	7	7	6	7	无
458	1	1	1	1	4	3	3	1	1	2	1	5	5	5	5	5	5	5	5	5	5	5	5	5	5	5	5	5	5	5	5	5	5	5	5	5	5	5	5	5	5	5	5	无
459	1	1	1	1	3	2	2	1	2	1	1	5	3	4	4	5	5	3	4	5	4	4	5	5	4	5	5	5	5	5	5	5	5	5	5	5	5	5	5	5	5	5	5	无
460	2	1	1	1	2	3	3	5	2	1	1	7	7	7	7	7	7	7	7	7	7	7	7	7	7	7	7	7	7	7	7	7	7	7	7	7	7	7	7	7	7	7	7	无
461	2	1	1	2	2	1	1	4	2	2	4	4	4	4	4	4	4	4	4	4	4	4	4	4	4	4	4	4	4	4	4	4	4	4	4	4	4	4	4	4	4	4	4	无
462	2	1	2	1	4	1	2	1	1	2	1	5	5	5	5	5	5	5	5	5	5	5	5	5	6	5	6	7	6	6	6	6	6	6	6	6	6	6	6	6	6	6	6	无
463	2	1	3	1	2	1	1	1	1	1	4	6	4	3	6	4	4	4	5	2	2	3	7	4	3	7	2	5	2	3	3	2	4	7	5	5	5	5	7	3	3	4	3	建议
464	1	1	1	1	2	3	3	3	1	1	1	7	7	7	7	7	7	7	7	7	7	7	7	7	7	7	7	7	7	7	7	7	7	7	7	7	7	7	7	7	7	7	7	无
465	1	1	1	1	4	1	1	5	2	3	1	4	4	4	4	4	4	4	4	4	4	4	4	4	4	4	4	4	4	4	4	4	4	4	4	4	4	4	4	4	4	4	4	无
466	1	1	1	2	1	3	2	3	2	2	1	4	4	4	4	4	4	4	4	4	4	4	4	4	4	4	4	4	4	4	4	4	4	4	4	4	4	4	4	4	4	4	4	无
467	1	1	1	1	2	3	2	1	1	1	4	2	2	2	4	2	2	2	2	6	6	6	4	5	5	5	5	7	6	4	2	5	5	5	5	5	5	5	5	6	6	6	6	无
468	1	1	2	1	4	1	1	4	2	2	1	7	5	7	7	4	3	4	7	7	7	2	3	4	4	4	4	7	4	4	4	4	4	4	7	2	2	2	2	3	3	4	4	/
469	1	1	1	1	4	1	1	4	1	2	4	6	6	6	6	6	6	6	6	6	6	6	6	6	6	6	6	6	6	6	6	6	6	6	6	6	6	6	6	6	6	6	6	无
470	2	3	3	1	2	3	1	2	1	1	2	5	5	7	6	6	5	6	6	7	7	7	7	6	6	5	6	7	6	6	5	4	7	6	6	6	6	6	7	6	6	6	6	无
471	2	1	3	1	4	1	1	2	1	3	4	4	4	5	3	4	3	4	5	4	4	4	4	4	3	4	4	4	3	4	4	3	3	4	4	4	4	4	6	4	4	4	4	无
472	2	1	1	1	2	3	2	2	1	2	4	4	4	4	4	4	4	4	4	4	4	4	4	4	4	4	4	4	4	4	4	4	4	4	4	4	4	4	4	4	4	4	4	无
473	2	2	5	1	4	1	1	1	2	2	2	4	4	4	4	4	4	4	4	4	4	4	4	4	4	4	4	4	4	4	4	6	5	5	5	4	4	4	4	4	4	4	4	无
474	1	1	1	1	3	1	1	1	1	1	4	7	7	7	7	7	7	7	7	7	7	7	7	7	7	7	7	7	7	7	7	7	7	7	7	7	7	7	7	7	7	7	7	无
475	2	2	3	1	2	1	1	1	1	1	1	7	7	7	7	7	7	7	7	7	7	7	7	7	7	7	7	7	7	7	7	7	7	7	7	7	7	7	7	7	7	7	7	无
476	2	3	2	1	2	1	1	5	2	3	4	4	4	4	4	4	4	4	4	4	4	4	4	4	4	4	4	4	4	4	4	4	4	4	4	4	4	4	4	4	4	4	4	无
477	2	1	2	1	4	1	1	3	2	1	1	6	5	5	6	5	4	5	4	5	4	5	5	5	4	5	5	5	6	5	5	3	5	4	6	5	5	5	3	5	4	5	5	无
478	1	1	1	1	4	1	1	2	2	1	1	3	4	4	3	4	4	4	3	4	3	3	3	3	3	3	3	3	3	3	3	3	3	3	3	2	2	2	2	2	2	2	2	无
479	2	3	2	1	4	1	1	2	2	2	3	5	4	4	4	4	4	4	4	4	4	4	4	4	4	4	4	5	4	4	5	5	4	4	4	4	4	4	4	4	4	4	4	没有
480	2	1	2	1	4	2	2	1	1	2	4	3	3	3	3	3	3	3	3	3	3	3	3	3	3	3	3	3	3	3	3	3	3	3	3	3	3	3	3	4	4	4	4	无
481	1	1	3	2	4	2	2	1	2	2	1	4	4	4	4	4	4	4	4	4	4	4	4	4	4	4	4	4	4	4	4	4	3	5	2	4	4	4	4	4	4	4	4	无
482	2	1	1	1	1	1	1	3	2	1	4	4	4	4	4	4	4	4	4	4	4	4	4	4	4	4	4	4	4	4	4	4	4	4	4	4	4	4	4	4	4	4	4	无
483	1	1	1	1	2	1	1	3	2	3	4	1	1	1	7	1	1	1	1	1	1	1	1	1	1	1	1	1	1	1	1	1	1	1	1	1	1	1	1	1	1	1	1	不知道学的什么一点专业课都没有
484	2	3	2	1	3	1	1	2	2	1	1	7	7	7	7	5	5	5	5	5	5	5	5	5	5	5	5	5	5	5	5	5	5	5	5	5	5	5	5	5	5	5	5	无
485	2	3	2	1	4	2	1	2	2	1	1	7	7	6	6	6	6	6	6	6	6	6	6	6	3	5	5	5	5	5	5	5	5	5	5	5	5	5	5	5	5	5	5	无
486	2	3	2	1	3	2	2	3	1	1	1	5	5	5	5	5	5	5	5	5	5	5	5	5	5	5	5	6	6	6	6	5	5	5	5	6	6	6	6	5	5	5	5	有
487	1	3	2	1	4	1	1	2	1	1	3	7	7	7	7	7	4	4	7	7	7	7	7	7	7	7	7	7	7	7	7	7	7	7	7	7	7	7	7	7	7	7	7	无
488	1	1	1	1	3	1	1	2	2	2	1	4	4	4	4	4	4	4	4	4	4	4	4	4	4	4	4	4	4	4	4	4	4	4	4	4	4	4	4	4	4	4	4	无
489	2	3	5	1	3	1	1	2	1	1	1	7	7	7	7	7	7	7	7	7	7	7	7	7	7	7	7	7	7	7	7	7	7	7	7	7	7	7	7	7	7	7	7	无
490	2	1	1	1	4	3	3	5	2	3	1	5	5	5	5	5	5	5	5	5	5	5	5	5	5	5	5	5	5	5	5	5	5	5	5	5	5	5	5	5	5	5	5	无
491	1	1	1	1	4	1	2	1	1	1	1	7	7	7	7	4	7	7	7	4	5	7	5	7	7	7	7	7	7	7	7	7	7	7	7	7	7	7	7	7	7	7	7	无
492	1	3	2	1	4	1	1	3	1	1	1	4	4	4	4	4	4	4	4	4	4	4	4	4	4	4	4	4	4	4	4	4	4	4	4	4	4	4	4	4	4	4	4	1
493	2	3	2	1	4	3	1	1	1	1	1	5	5	7	6	5	6	5	5	5	6	5	5	4	5	4	5	4	5	4	5	5	4	5	5	5	5	6	5	6	5	5	6	无
494	2	3	2	1	2	3	3	1	1	2	1	5	5	5	5	3	3	4	4	7	5	4	5	4	4	4	4	4	4	4	4	4	4	4	4	4	4	4	4	4	4	4	4	无
495	1	3	2	1	2	1	2	4	1	1	1	7	7	7	4	4	4	4	4	4	4	4	4	4	4	4	4	4	4	4	4	4	4	4	4	4	4	4	4	4	4	4	4	无
496	1	3	2	1	4	1	1	3	1	1	1	5	5	5	5	5	5	5	5	5	5	5	5	5	5	5	5	5	5	5	5	5	5	5	5	5	5	5	5	5	5	5	5	无
497	2	3	2	1	1	1	1	2	2	1	1	4	4	4	4	4	4	4	4	4	4	4	4	4	4	4	4	4	4	4	4	4	4	4	4	4	4	4	4	4	4	4	4	无
498	1	1	1	1	3	1	2	1	1	1	1	7	6	5	7	7	5	4	7	5	5	4	4	7	7	7	7	7	7	7	6	4	4	4	6	7	6	6	5	6	6	7	7	无
499	2	1	1	1	4	1	1	3	2	3	4	4	4	4	4	4	4	4	4	4	4	4	4	4	4	4	4	4	4	4	4	4	4	4	4	4	4	4	4	4	4	4	4	没有
500	2	3	2	1	3	1	2	5	2	2	1	4	5	4	3	4	5	5	3	4	3	5	3	4	5	4	3	4	3	3	4	5	3	3	3	5	4	4	5	5	5	4	5	无
501	2	1	3	1	3	2	3	2	2	1	3	7	7	7	7	7	7	7	7	6	6	6	6	5	6	6	6	6	6	6	6	5	5	5	5	6	6	6	6	6	6	6	6	无
502	2	1	2	2	2	3	2	1	2	1	1	2	2	2	2	2	2	2	2	2	2	5	4	4	4	2	4	3	4	4	4	4	3	3	3	4	4	4	2	3	5	3	4	.
503	2	3	2	1	2	2	2	3	2	1	1	5	5	5	5	6	6	5	5	6	6	6	5	6	6	6	5	6	5	5	5	5	5	6	6	5	5	5	5	6	5	5	5	无
504	2	3	2	1	1	2	2	1	1	1	1	4	4	4	4	4	4	4	4	4	4	4	4	3	3	3	3	3	3	3	3	3	3	3	3	3	3	3	3	4	4	4	4	帮我提供一些优质实习、实践岗位
505	1	3	3	1	4	1	1	3	1	2	3	6	5	6	6	6	6	5	6	6	6	5	6	6	6	5	6	5	7	7	7	7	7	7	6	7	6	4	6	6	6	5	6	无
506	2	1	2	1	2	3	3	1	1	1	1	6	6	6	6	5	5	5	5	5	5	5	5	5	5	5	5	5	5	5	5	5	5	5	5	5	5	5	5	5	5	5	5	有的时候会迷茫不知道未来到底会干什么 但还是会尽量提升自己
507	2	3	2	1	1	3	3	1	1	1	2	5	4	4	4	4	4	4	4	4	4	4	4	4	4	4	4	4	4	4	4	4	4	4	4	4	4	4	4	4	4	4	4	无
508	2	3	2	1	2	3	3	2	1	1	1	4	4	4	4	4	4	4	4	4	4	4	4	4	4	4	5	4	5	4	5	4	5	4	5	4	4	4	4	4	4	4	4	无
509	2	1	5	1	3	2	1	2	2	1	1	4	4	4	4	4	4	4	4	4	4	4	4	4	4	4	4	4	4	4	4	4	4	4	4	4	4	4	4	4	4	4	4	无
510	2	3	2	1	4	3	3	1	1	1	1	4	4	4	4	4	4	4	4	4	4	4	4	4	4	4	4	4	4	4	4	4	4	4	4	4	4	4	4	4	4	4	4	无
511	2	3	2	2	4	1	1	2	2	1	1	5	4	5	5	5	4	5	5	5	5	5	5	5	4	4	4	6	5	5	3	3	5	3	5	5	5	5	5	5	5	5	4	无
512	1	2	1	1	1	2	2	4	1	3	4	7	7	7	7	7	7	7	7	7	7	7	7	7	7	7	7	7	7	7	7	7	7	7	7	7	7	7	7	7	7	7	7	系统搭建了职业发展所需的知识框架，为后续岗位实践、行业深造提供了底层支撑。例如专业核心课覆盖了行业核心技术、基础原理与行业规范，让我在求职与岗位适配中具备了基础竞争力，为实现“成为行业专业技术/管理人才”的职业目标奠定了理论基础。
513	1	3	3	1	2	2	3	5	2	2	2	2	2	7	7	7	7	7	7	7	7	5	1	2	6	3	6	4	5	4	2	2	2	5	2	3	2	3	3	3	6	6	3	有一些相对用处很小的课，凭心而论对职业发展助力不足
514	2	3	2	2	2	2	3	3	2	1	1	7	7	7	7	7	7	7	7	7	7	7	7	7	7	7	7	7	7	7	7	7	7	7	7	7	7	7	7	7	7	7	7	无
515	1	1	1	1	1	1	3	5	1	1	2	1	5	5	5	1	4	5	5	4	4	5	4	4	4	4	4	4	3	4	5	3	5	5	5	3	3	5	3	3	5	5	7	不用
516	2	3	2	1	4	1	3	1	1	1	1	7	7	7	7	7	7	7	7	7	7	7	7	7	7	7	7	7	7	7	7	7	7	7	7	7	7	7	7	7	7	7	7	无
517	2	1	3	1	4	1	1	5	2	2	4	4	4	4	4	4	4	4	4	4	4	4	5	4	3	4	4	7	7	4	4	5	5	5	5	7	7	7	7	5	3	5	5	无
518	1	1	1	1	3	1	1	5	1	1	1	7	7	7	7	7	7	7	7	7	7	7	7	7	7	7	7	7	7	7	7	7	7	7	7	7	7	7	7	7	7	7	7	无
519	2	3	2	1	3	1	1	1	1	1	1	4	4	4	4	4	4	4	4	4	4	4	4	4	4	4	4	4	4	4	4	4	4	4	4	4	4	4	4	4	4	4	4	无
520	2	3	2	1	4	2	2	1	1	1	1	6	6	6	6	3	3	3	3	3	3	3	3	3	3	3	3	3	3	3	3	3	3	3	3	3	3	3	3	3	3	3	3	无
521	1	1	5	1	4	4	4	3	2	1	4	2	2	2	2	2	2	3	3	3	3	3	3	2	2	2	3	2	3	2	2	2	3	2	2	2	2	2	3	2	3	2	2	无
522	2	3	5	1	4	2	2	3	2	1	1	7	7	7	7	7	7	7	7	7	7	7	7	7	7	7	7	7	7	7	7	7	7	7	7	7	7	7	7	7	7	7	7	无
523	2	1	2	1	3	2	1	2	2	1	2	4	5	5	5	4	4	5	5	3	4	5	4	3	3	3	3	3	3	4	4	3	5	4	4	3	5	4	4	4	4	4	4	无
524	2	4	2	1	2	2	2	2	2	3	4	4	2	4	4	3	5	5	2	5	5	3	5	5	2	5	5	5	5	5	2	3	5	2	2	4	2	3	5	4	3	5	2	无
525	2	3	3	1	4	1	1	1	1	2	1	5	5	5	5	5	5	5	5	5	5	5	5	5	5	5	5	5	5	5	5	5	5	5	5	5	5	5	5	5	5	5	5	无
526	2	3	5	1	2	3	2	5	2	3	1	7	5	5	5	5	5	5	5	5	5	5	5	6	5	5	3	5	3	4	1	4	4	4	4	4	4	4	4	4	4	4	4	无
527	2	1	2	1	2	3	2	2	1	2	4	4	3	3	5	4	4	4	3	3	3	4	3	4	3	4	3	7	4	6	3	3	4	4	4	5	3	4	6	4	4	4	4	无
528	1	1	1	1	2	3	3	3	2	1	1	7	7	7	7	4	4	4	4	6	6	4	5	5	7	4	5	4	5	5	5	5	5	5	5	5	5	5	5	5	5	5	5	没用
529	1	1	2	1	2	3	3	1	1	1	1	5	5	5	5	5	5	5	5	5	5	5	5	5	5	5	5	5	5	5	5	5	5	5	5	5	5	5	5	5	5	5	5	无
530	1	3	2	1	3	2	2	2	1	1	1	7	7	7	7	7	7	7	7	7	7	7	7	7	7	7	7	7	7	7	7	7	7	7	7	7	7	7	7	7	7	7	7	应帮助学生更好的实习
531	1	1	2	1	4	2	2	5	2	3	1	7	7	7	7	7	7	7	7	7	7	7	7	7	7	7	7	7	7	7	7	7	7	7	7	7	7	7	7	7	7	7	7	无
532	1	2	2	1	3	3	2	1	2	1	1	5	5	4	5	5	4	5	4	5	4	5	4	5	4	5	4	4	5	4	4	5	5	4	5	5	5	5	5	4	5	4	5	无
533	2	3	2	1	3	1	1	3	1	3	3	4	2	4	4	4	3	4	4	4	4	4	4	4	4	4	4	4	4	4	4	4	4	4	4	4	4	4	4	4	4	4	4	没有
534	2	3	2	1	4	1	2	3	2	3	1	2	1	4	5	3	4	4	2	7	7	7	7	7	7	7	7	7	7	7	7	7	7	7	7	7	7	7	7	7	7	7	7	无
535	2	3	2	1	2	3	3	1	2	1	1	5	5	5	6	5	4	4	6	7	7	5	6	7	7	7	7	7	7	7	7	5	7	7	7	6	6	6	6	7	7	7	7	老师指导就业
536	2	3	2	1	2	1	1	1	1	1	1	4	5	5	4	6	5	5	6	5	6	5	6	4	4	4	4	6	6	6	4	4	6	6	6	5	4	5	4	5	4	5	4	无
537	1	1	2	1	2	3	2	2	2	1	1	7	7	7	7	7	7	7	7	7	7	7	7	7	7	7	7	7	7	7	7	7	7	7	7	7	7	7	7	7	7	7	7	无
538	1	3	3	1	3	3	3	3	2	1	1	4	4	4	4	4	4	4	4	4	4	4	4	4	4	4	4	4	4	4	4	4	4	4	4	4	4	4	4	4	4	4	4	无建议
539	2	1	1	1	4	1	1	4	2	1	1	2	2	3	6	3	3	4	4	3	4	5	4	4	4	4	5	7	4	4	4	2	5	4	5	5	4	4	4	5	5	5	3	无
540	2	4	2	1	4	1	1	2	2	2	3	6	6	3	4	4	7	5	3	7	3	6	2	7	5	6	5	7	3	6	7	7	5	6	7	7	2	4	6	5	5	5	5	无
541	1	1	2	1	4	1	1	1	2	1	1	6	5	7	7	5	7	7	7	7	7	6	7	6	6	7	7	7	6	7	6	6	7	6	7	7	7	7	7	7	7	7	6	无
542	2	3	2	1	2	2	2	4	2	1	1	7	7	7	7	5	5	6	5	5	6	6	5	5	6	6	5	6	6	6	6	5	5	5	5	5	5	5	6	5	5	5	5	。
543	1	3	2	1	3	3	3	2	1	1	3	7	7	7	7	7	7	7	7	7	7	7	7	7	7	7	7	7	7	7	7	7	7	7	7	7	7	7	7	7	7	7	7	无
544	1	1	1	1	4	2	1	1	1	1	1	5	4	3	6	5	5	5	4	5	4	4	4	4	4	4	4	7	7	7	7	5	7	6	6	5	2	3	4	7	7	7	7	多开点专业课
545	2	3	5	1	2	2	2	2	2	2	4	5	5	5	5	4	4	4	5	4	5	5	5	4	4	4	4	4	4	4	4	4	4	4	4	4	4	4	4	4	4	4	4	。
546	2	1	3	1	4	2	2	4	1	1	4	2	2	2	2	2	2	2	2	2	2	2	2	2	2	3	3	3	3	3	3	3	3	3	3	3	3	3	3	3	3	3	3	没有
547	2	1	2	1	1	4	3	4	1	3	3	1	5	5	5	1	1	1	1	1	1	1	1	1	1	1	1	1	5	1	5	1	6	5	2	2	4	2	2	2	4	2	2	无
548	2	3	3	1	3	1	1	4	2	1	2	5	4	4	5	5	3	4	5	5	5	5	5	5	5	5	5	5	5	5	5	5	5	5	3	5	5	5	5	5	5	5	5	无
549	1	1	1	1	2	3	3	2	1	2	1	5	2	1	7	6	5	6	4	2	5	4	1	6	6	6	7	4	3	2	3	1	2	5	6	2	5	5	6	5	3	3	4	无
550	1	2	1	1	4	1	1	2	1	2	1	5	5	5	5	5	5	5	5	5	5	5	5	5	5	5	5	6	5	5	5	3	4	4	4	5	5	5	5	5	5	5	5	无
551	1	3	1	1	4	2	2	4	1	1	1	7	7	7	7	7	7	7	7	7	7	7	7	7	7	7	7	7	7	7	7	7	7	7	7	7	7	7	7	7	7	7	7	无
552	2	3	2	1	3	2	1	1	1	1	1	6	2	3	3	4	4	4	4	4	4	4	4	4	4	3	4	3	5	3	5	3	3	2	4	3	2	3	4	3	4	2	4	无
553	1	1	1	1	4	1	1	1	2	1	1	7	7	7	7	7	7	7	7	7	7	7	7	7	7	7	7	7	7	7	7	7	7	7	7	7	7	7	7	7	7	7	7	无
554	2	3	2	1	4	2	1	2	2	1	1	5	4	4	5	5	5	5	6	4	5	5	5	4	4	4	4	5	6	4	4	3	5	4	5	4	4	4	5	4	3	4	3	无
555	2	1	2	1	4	1	1	3	2	1	4	5	3	4	6	4	2	4	5	5	6	3	2	2	2	4	5	7	5	7	4	1	5	3	2	3	4	5	6	4	3	6	4	无
556	1	3	2	1	3	3	1	5	2	2	1	4	4	4	4	4	4	4	4	4	4	4	4	4	4	4	4	4	4	4	4	4	4	4	4	4	4	4	4	4	4	4	4	无
557	2	3	3	1	4	3	1	2	1	1	2	5	3	4	5	4	3	4	4	5	4	5	4	4	4	5	6	6	5	4	5	3	4	5	4	4	5	5	5	5	5	5	4	进一步发挥学生的主观能动性，提高学生在课堂中的主动性。
558	2	3	2	1	2	2	1	3	2	3	1	7	7	7	7	7	7	7	7	7	7	7	7	7	7	7	7	7	7	7	7	7	7	7	7	7	7	7	7	7	7	7	7	无
559	1	1	1	1	4	2	1	1	1	1	1	4	4	4	4	4	4	4	4	4	4	4	4	4	4	4	4	4	4	4	4	4	4	4	4	4	4	4	4	4	4	4	4	多开点专业课比啥都强，现在都不开专业课，啥事也没有
560	1	1	1	1	2	3	3	4	2	3	2	5	5	5	5	5	5	5	5	5	5	5	5	5	5	5	5	5	5	5	5	5	5	5	5	5	5	5	5	5	5	5	5	无
561	1	3	2	2	2	1	1	5	1	1	1	4	4	4	5	3	3	3	3	3	3	3	3	3	3	3	3	3	3	3	3	3	3	3	3	4	3	4	4	3	3	3	3	没有
562	1	3	1	1	4	1	1	2	2	1	4	3	2	2	2	2	2	2	2	2	2	2	2	2	2	2	2	2	2	2	2	2	2	2	2	2	2	2	2	2	2	2	2	无
563	2	1	1	1	3	2	1	3	2	2	3	6	6	6	6	6	6	6	6	6	6	6	6	6	6	6	6	5	5	5	5	5	5	5	5	4	4	4	4	4	4	4	4	无
564	2	3	2	1	4	2	1	2	2	2	1	4	4	4	4	4	4	4	4	4	4	4	4	4	4	4	4	4	4	4	4	4	4	4	4	4	4	4	4	4	4	4	4	帮主提供一些优质实习或兼职
565	1	2	1	1	4	3	2	5	2	2	1	7	7	7	7	7	7	7	7	7	7	7	7	7	7	7	7	7	7	7	7	7	7	7	7	7	7	7	7	7	7	7	7	无
566	2	1	1	2	2	2	3	1	1	2	1	7	7	7	7	7	7	7	7	7	7	7	7	7	7	7	7	7	7	7	7	7	7	7	7	7	7	7	7	7	7	7	7	无
567	1	2	2	1	4	1	1	2	1	1	1	2	2	2	2	3	3	3	3	3	3	4	3	3	3	3	3	3	3	3	3	3	3	3	3	3	3	3	3	3	3	3	3	无
568	2	2	2	1	4	1	1	1	1	1	1	5	5	5	5	5	5	5	5	5	5	5	5	4	4	4	4	4	4	4	4	4	4	4	4	5	5	5	5	5	5	5	5	无
569	1	2	5	1	4	1	2	5	2	1	1	7	7	7	7	7	7	7	7	7	7	7	7	7	7	7	7	7	7	7	7	7	7	7	7	7	7	7	7	7	7	7	7	无
570	2	2	2	1	2	1	2	2	2	1	1	4	4	4	4	4	4	4	4	4	4	4	4	4	4	4	4	4	4	4	4	4	4	4	4	4	4	4	4	4	4	4	4	无
571	1	1	5	1	4	1	1	5	2	3	4	1	1	2	2	2	2	3	3	4	3	3	3	4	4	3	4	3	3	3	3	3	3	3	3	4	5	3	4	3	3	2	3	无
572	2	2	2	1	4	1	2	2	1	1	1	5	5	5	6	4	3	5	6	7	7	7	7	7	7	7	7	6	6	6	6	6	6	4	4	7	7	7	7	7	7	7	7	无
573	2	2	5	1	2	3	2	4	2	2	1	5	5	5	5	5	6	5	5	5	5	5	5	5	5	5	5	4	5	5	4	5	5	5	5	5	5	5	5	5	5	4	5	无
574	2	1	1	1	4	1	1	2	2	2	1	7	7	7	7	7	7	7	7	7	7	7	7	7	7	7	7	7	7	7	7	7	7	7	7	7	7	7	7	7	7	7	7	无
575	2	3	2	1	2	1	1	1	1	1	1	7	7	7	7	7	7	7	7	7	7	7	7	7	7	7	7	7	7	7	7	7	7	7	7	7	7	7	7	7	7	7	7	无
576	2	2	2	1	4	2	1	4	2	1	1	7	7	7	7	7	7	7	7	7	7	7	7	7	7	7	7	7	7	7	7	7	7	7	7	7	7	7	7	7	7	7	7	无
577	2	3	3	1	2	1	1	4	2	1	3	5	5	4	4	5	4	4	5	5	4	4	5	5	4	4	5	5	4	4	4	3	4	3	4	3	3	4	4	4	4	3	4	无
578	1	1	1	1	4	2	2	2	2	1	1	6	6	6	6	6	6	6	6	6	6	6	6	6	6	6	6	6	6	6	6	6	6	6	6	6	6	6	6	6	6	6	6	无
579	1	1	1	1	4	1	1	5	2	1	4	3	3	5	5	3	3	4	5	3	5	2	2	4	2	6	5	5	2	2	1	6	6	6	6	6	6	6	6	6	6	6	6	无
580	1	3	2	1	2	1	2	2	1	2	1	7	7	7	7	7	7	7	7	7	7	7	7	7	7	7	7	7	7	7	7	7	7	7	7	7	7	7	7	7	7	7	7	很好
581	2	3	1	2	4	1	1	2	1	2	4	4	4	4	4	4	4	4	4	4	4	4	4	4	4	4	4	4	4	4	4	4	4	4	4	4	5	4	5	5	5	5	5	无
582	2	2	2	1	4	1	1	1	2	1	1	7	5	4	5	5	5	4	3	4	5	5	6	4	5	5	5	5	4	5	5	3	4	5	6	5	5	5	5	5	6	6	6	无
583	1	1	3	1	2	3	3	3	2	2	4	4	4	5	6	4	4	5	5	3	4	3	5	5	4	4	5	5	5	4	4	5	4	4	4	5	5	5	5	6	5	5	4	行
584	2	1	2	1	2	1	1	1	1	1	1	4	4	4	4	4	4	4	4	4	4	4	4	4	4	4	4	4	4	4	4	4	4	4	4	5	4	4	4	4	4	4	4	无
585	2	3	2	1	2	1	1	1	1	2	1	4	4	4	4	4	4	4	4	4	4	4	4	4	4	4	4	4	4	4	4	4	4	4	4	4	4	4	4	4	4	4	4	。
586	1	1	2	1	2	3	2	3	2	1	1	4	4	4	4	3	3	4	4	4	3	5	4	4	4	5	3	4	4	4	4	4	4	4	4	5	3	4	4	4	4	4	4	无
587	2	2	2	1	2	3	1	1	2	2	1	3	3	3	3	3	3	3	3	3	3	3	3	3	3	3	3	3	3	3	3	3	3	3	3	3	3	3	3	3	3	3	3	教学内容与实习工作衔接不紧密
588	1	1	1	1	1	3	3	1	1	1	1	6	6	6	6	5	6	6	6	6	6	6	6	6	6	6	6	6	6	6	3	6	6	6	6	6	6	6	6	6	6	6	6	无
589	2	1	2	1	2	2	2	3	2	2	1	7	7	7	7	7	7	7	7	7	7	7	7	7	7	7	7	7	7	7	7	7	7	7	7	7	7	7	7	7	7	7	7	无
590	2	2	2	1	4	1	1	2	2	1	1	4	4	4	4	4	4	4	4	4	4	4	4	4	4	4	4	4	4	4	4	4	4	4	4	4	4	4	4	4	4	4	4	无
591	2	3	3	1	2	3	3	4	2	1	2	4	4	4	4	4	4	4	4	4	4	4	4	4	4	4	4	4	4	4	4	4	4	4	4	4	4	4	4	4	4	4	4	无
592	2	1	1	1	3	1	1	2	2	1	1	7	7	1	6	1	1	2	1	2	2	2	2	4	4	3	3	3	4	3	2	3	3	3	3	3	3	3	4	2	2	2	2	无
593	2	3	3	1	2	2	1	1	1	2	3	4	4	4	4	4	4	4	4	4	4	4	4	4	4	4	4	4	4	4	4	4	4	4	4	4	4	4	4	4	4	4	4	无
594	2	2	2	1	4	1	1	2	2	1	1	5	5	5	5	5	5	5	5	5	5	5	5	5	5	5	5	7	5	5	5	4	4	4	4	6	6	6	6	5	5	5	5	无
595	2	2	3	1	4	1	1	1	2	2	1	7	3	3	7	4	6	6	6	4	5	5	6	5	6	7	7	7	3	4	3	3	5	5	5	4	4	3	5	5	5	7	6	无
596	1	1	3	1	2	2	1	5	2	1	1	4	4	4	3	5	4	5	3	3	4	4	3	5	6	3	4	3	4	5	4	5	3	4	5	5	4	4	4	3	4	5	3	无
597	1	2	1	1	2	2	1	4	1	1	1	3	4	4	4	5	4	4	4	4	4	4	4	4	4	4	4	6	4	5	4	4	4	4	4	7	7	7	7	6	6	5	5	无
598	1	3	1	1	1	1	3	1	1	1	3	1	2	2	2	2	2	2	1	1	1	1	1	1	1	1	1	1	1	1	1	1	1	1	1	1	1	1	1	1	1	1	1	w
599	1	1	1	1	3	1	1	2	1	2	3	4	5	4	5	5	4	5	4	3	4	3	3	4	4	4	4	4	4	4	4	4	4	4	4	4	4	4	4	4	4	4	4	没有
600	2	2	2	1	4	1	2	3	2	2	1	3	2	3	5	4	4	5	6	6	7	5	6	6	5	6	6	7	7	5	4	1	6	5	7	5	5	4	6	6	5	5	6	时间安排空隙少
601	1	3	1	1	2	1	1	4	1	2	3	7	7	7	7	7	7	7	7	7	7	7	7	7	7	7	7	7	7	7	7	7	7	7	7	7	7	7	7	7	7	7	7	无
602	2	3	3	1	2	3	3	1	1	1	3	7	7	7	7	7	7	7	7	7	7	7	7	7	7	7	7	7	7	7	6	7	7	6	7	7	7	7	7	7	7	7	4	职本专业目录没有纳入公务员招考目录，非常影响就业
603	2	1	2	2	2	3	3	1	1	1	2	7	7	7	7	6	6	6	6	7	7	7	7	6	7	7	7	7	7	6	5	5	5	5	5	6	6	6	6	6	6	6	6	无
604	1	1	3	1	4	1	1	4	2	2	1	4	5	4	4	4	4	4	4	4	4	4	3	3	3	3	3	4	4	4	4	4	4	4	4	3	4	4	4	4	4	4	4	无
605	1	2	2	1	2	2	2	3	1	2	1	3	3	4	4	3	4	3	4	3	4	4	3	4	3	3	4	4	3	4	3	4	3	4	3	4	4	5	4	3	4	3	4	无
606	2	2	2	1	2	1	1	1	1	1	1	6	6	5	6	6	5	6	6	6	6	6	6	6	6	6	6	6	6	6	6	6	6	6	6	6	6	6	6	6	6	6	6	无
607	2	1	2	1	4	1	1	3	1	1	2	5	4	5	4	4	4	5	3	4	4	3	4	4	4	4	4	4	3	4	4	3	3	4	4	4	5	4	7	4	5	5	4	无
608	2	2	2	1	2	1	1	5	2	3	1	4	4	4	4	4	4	4	4	7	5	4	4	4	4	4	4	4	4	4	4	4	4	4	4	4	4	4	4	4	4	4	4	无
609	1	2	2	1	3	1	1	3	2	1	1	5	5	5	5	4	4	4	4	4	4	4	4	4	4	4	4	4	4	4	4	4	4	4	4	4	4	4	4	4	4	4	4	无
610	1	2	2	2	3	3	2	4	1	1	1	5	5	5	6	4	4	5	5	5	6	5	5	5	4	4	4	5	3	5	5	3	5	5	5	4	5	5	3	5	5	5	5	无
611	1	3	2	1	4	2	1	5	2	2	1	4	4	4	4	4	4	4	4	4	4	4	4	4	4	4	4	4	4	4	4	4	4	4	4	4	4	4	4	4	4	4	4	无
612	2	2	2	1	3	1	1	3	2	1	1	5	4	3	4	3	4	3	4	3	3	4	4	3	3	5	3	6	4	4	4	3	5	4	3	4	5	4	4	5	4	4	5	无
613	2	2	3	1	4	1	1	2	2	2	1	2	1	1	1	1	1	1	1	1	1	1	1	1	1	1	1	4	3	3	3	2	2	2	2	2	2	2	2	2	3	3	3	无
614	1	1	3	2	1	3	4	1	2	1	1	6	5	3	3	5	3	5	3	6	2	3	5	6	4	3	3	5	3	4	4	5	4	4	6	4	4	3	3	5	4	3	3	无
615	2	2	2	1	2	2	2	4	2	2	1	5	4	6	6	5	5	6	6	6	6	5	4	6	6	4	5	6	6	6	6	6	6	6	6	6	4	6	6	6	6	6	6	无
616	1	2	3	1	2	3	2	4	2	2	1	5	5	5	5	4	4	5	5	5	4	5	5	5	5	5	6	5	5	6	5	5	5	6	5	5	6	5	5	6	6	5	5	可以多增加一些实操
617	2	2	2	1	4	1	1	4	2	3	1	3	3	3	4	2	2	2	2	3	3	3	3	3	3	3	3	3	2	2	3	3	2	2	2	3	3	3	3	2	4	4	3	无
618	1	1	1	1	2	2	1	5	2	2	1	4	4	4	4	5	4	5	3	6	5	3	4	6	4	6	5	4	6	4	5	4	4	5	3	5	4	3	5	4	6	4	3	无
619	1	2	5	1	4	2	2	3	1	1	1	3	4	3	3	3	5	3	5	3	5	5	5	4	5	5	5	5	5	4	5	5	5	6	5	5	5	6	6	6	6	5	5	无
620	2	2	5	1	4	2	1	1	1	1	1	5	4	3	5	5	4	5	3	4	5	3	3	3	3	3	3	5	2	3	4	3	5	4	5	4	3	4	4	3	3	4	5	无
621	2	2	2	1	4	1	1	1	1	1	1	7	4	4	4	3	5	5	5	7	7	7	7	7	7	7	6	5	6	6	5	5	6	6	6	6	5	6	6	6	6	6	6	无
622	1	2	2	1	4	1	1	4	1	1	1	4	4	4	4	4	4	4	4	4	4	4	4	4	4	4	4	4	4	4	4	4	4	4	4	4	4	4	4	4	4	4	4	无
623	2	2	2	1	3	3	2	1	1	1	1	7	7	7	7	7	7	7	7	7	7	7	7	7	7	7	7	7	7	7	7	7	7	7	6	7	7	7	7	7	7	7	7	无
624	2	2	2	1	2	2	2	3	2	1	2	5	2	5	6	6	5	6	5	4	5	5	6	5	4	4	4	5	4	4	4	2	5	4	5	5	5	5	5	5	4	4	4	无
625	2	2	5	1	4	2	2	4	2	2	1	4	4	4	4	4	4	4	4	4	4	4	4	4	5	3	5	5	5	5	5	4	4	4	4	4	4	4	4	4	4	4	4	无
626	1	2	2	1	3	1	1	5	2	1	1	5	5	4	5	4	4	4	3	4	4	4	4	5	5	5	5	6	5	4	3	4	4	4	4	4	4	4	4	4	4	5	7	无
627	1	2	2	1	4	1	1	4	2	1	1	6	3	3	5	5	5	5	3	5	5	4	4	5	3	4	3	5	3	5	4	5	5	3	3	5	5	4	3	5	5	5	4	无
628	2	2	5	1	2	2	2	4	2	2	1	7	7	7	7	7	7	7	7	7	7	7	7	7	7	7	7	7	7	7	7	7	7	7	7	7	7	7	7	7	7	7	7	无
629	2	2	2	1	4	1	1	5	2	1	1	4	4	3	4	4	5	3	4	3	4	4	3	4	3	4	3	4	3	4	4	4	5	4	3	4	3	5	4	5	3	5	4	无
630	2	2	5	1	3	1	1	1	1	2	1	4	5	3	5	5	4	5	5	4	5	3	5	5	3	4	4	4	5	5	3	5	5	3	5	5	4	5	4	5	4	4	5	目前没有
631	1	1	2	1	4	1	1	3	2	3	3	2	2	1	1	1	2	2	2	2	2	1	2	2	2	2	2	2	2	2	1	1	1	1	1	2	2	2	2	2	2	2	2	无
632	1	3	2	1	4	1	1	5	2	1	4	1	1	1	1	1	1	1	1	1	1	1	1	1	1	1	1	1	1	1	1	1	1	1	1	1	1	1	1	1	1	1	1	不知道
633	2	2	5	1	3	3	1	1	1	1	4	5	5	4	5	4	4	4	4	4	4	3	3	4	4	4	4	4	4	4	4	4	4	4	4	4	5	4	5	4	4	3	3	无
634	2	2	2	1	4	1	1	1	1	2	1	3	1	1	1	1	1	1	1	4	1	2	2	1	3	1	3	4	1	1	1	1	1	1	1	3	2	2	2	2	2	2	2	快点实习多实战 希望能多学点经验，不是课本上的东西
635	2	2	2	1	4	1	1	1	2	1	1	6	5	5	5	4	4	4	5	5	4	5	5	4	4	4	5	7	4	4	4	4	5	4	6	4	5	5	5	5	5	5	5	无
636	2	2	2	1	4	1	1	3	1	1	4	4	1	1	4	2	2	3	2	3	5	5	4	4	2	3	3	6	3	3	3	2	2	2	2	4	4	3	3	3	3	4	3	无
637	1	1	5	1	4	3	2	1	1	1	4	6	6	6	6	6	6	6	6	6	6	6	6	6	6	6	6	6	6	6	6	6	6	6	6	6	6	6	6	6	6	6	6	无
638	1	2	1	1	4	1	1	5	2	2	1	5	5	5	5	5	5	5	5	5	5	5	5	5	5	5	5	5	5	5	5	5	5	5	5	5	5	5	5	5	5	5	5	无
639	1	3	2	1	4	2	1	5	2	3	1	2	2	3	4	2	3	4	4	3	3	2	4	3	2	3	5	3	4	4	4	3	4	4	5	4	4	5	6	6	5	5	4	无
640	1	2	1	1	4	2	1	5	2	3	1	5	5	5	5	5	5	5	5	5	5	5	5	5	5	5	5	5	5	5	5	5	5	5	5	5	5	5	5	5	5	5	5	无
641	2	2	2	1	4	2	2	3	2	1	4	4	3	4	4	3	4	4	4	4	4	4	4	4	5	4	5	5	4	4	4	3	4	3	5	5	5	4	5	4	5	6	5	无
642	2	2	5	1	4	1	1	1	2	1	1	5	4	5	6	5	4	6	5	4	5	4	5	5	4	5	5	7	5	5	4	3	4	3	4	6	6	5	6	5	5	6	5	无
643	2	2	2	1	2	2	3	1	1	2	1	4	4	4	4	4	4	4	4	4	4	4	4	6	6	6	6	6	6	5	4	3	5	6	5	4	4	3	4	5	5	5	5	无
644	2	2	2	1	4	1	1	2	2	2	1	7	5	6	6	6	6	7	6	6	6	6	6	6	6	6	6	7	7	5	5	7	5	5	5	3	5	5	6	5	5	6	5	无
645	1	2	3	1	4	1	1	5	2	3	1	6	6	6	6	6	6	6	6	6	6	6	6	6	6	6	6	6	6	6	6	6	6	6	6	6	6	6	6	6	6	6	6	无
646	2	1	2	1	1	2	2	3	2	1	1	1	1	1	1	1	1	1	1	1	1	1	1	1	2	1	1	1	1	1	1	1	1	1	1	1	1	1	1	1	1	1	1	无
647	2	2	4	2	4	1	1	4	2	2	1	7	7	7	7	7	7	7	7	7	7	7	7	7	7	7	7	7	7	7	7	7	7	7	7	7	7	7	7	7	7	7	7	无
648	2	2	2	1	4	1	1	2	2	3	1	5	6	5	6	5	5	5	5	6	5	5	6	5	5	5	5	5	5	5	5	6	6	6	6	6	5	5	5	5	5	5	5	无
649	1	1	1	1	2	2	2	1	1	1	1	7	7	7	7	7	7	7	7	7	7	7	7	7	7	7	7	7	7	7	7	7	7	7	7	7	7	7	7	7	7	7	7	无
650	2	2	2	1	2	3	3	2	2	1	1	7	7	7	7	7	7	7	7	7	7	7	7	7	7	7	7	7	7	7	7	7	7	7	7	7	7	7	7	7	7	6	7	无
651	2	1	3	1	2	3	3	1	2	1	3	7	7	7	7	7	7	7	7	7	7	7	7	7	7	7	7	6	7	6	6	5	6	7	7	7	7	7	7	7	7	7	7	学校层面给予我实战机会
652	2	2	2	1	4	1	1	3	2	2	1	4	4	4	4	4	4	4	4	4	4	4	4	4	4	4	4	4	4	4	4	4	4	4	4	4	4	4	4	4	4	4	4	无
653	2	2	5	1	4	1	1	1	2	2	1	7	2	2	7	6	2	6	6	7	7	2	7	7	2	5	7	4	7	3	3	2	7	2	5	4	3	2	5	2	2	7	2	暂无
654	1	2	2	1	2	3	3	3	1	2	1	4	3	4	5	4	4	3	4	4	3	4	3	4	3	5	4	3	4	3	5	4	3	5	4	4	3	4	5	4	3	4	3	无
655	1	2	2	1	4	1	2	2	1	2	1	5	5	3	4	5	5	5	4	4	4	4	4	4	4	4	5	4	5	4	4	3	4	4	4	5	4	4	5	4	5	5	4	无
656	1	2	2	1	4	1	1	4	2	2	1	5	6	6	5	4	5	4	5	7	6	5	5	6	7	6	6	6	5	7	6	5	5	7	5	5	7	6	5	5	6	7	5	无
657	1	2	2	1	4	2	2	2	2	2	1	5	5	5	5	5	5	5	5	5	4	5	5	5	4	5	5	5	5	5	5	5	4	5	4	5	4	5	4	4	5	5	5	无
658	1	2	1	1	2	1	1	2	2	3	1	5	5	5	5	5	5	5	5	5	5	5	5	5	5	5	5	5	5	5	5	5	5	5	5	5	5	5	5	5	5	5	5	无
659	1	3	2	1	2	3	3	3	2	2	3	5	5	5	5	4	5	5	4	5	5	4	5	6	5	5	6	7	5	6	5	7	6	5	6	6	6	5	6	6	5	6	6	无
660	2	2	3	1	4	1	2	2	2	1	3	5	5	4	5	6	5	6	4	6	5	4	4	5	4	5	5	5	5	6	5	5	4	5	5	5	5	6	5	4	5	5	6	无
661	1	1	1	2	1	4	4	1	1	1	1	5	5	6	5	5	5	6	6	5	5	6	5	4	5	5	4	3	5	5	4	3	3	5	5	4	4	5	5	4	4	5	5	无
662	2	2	2	1	2	2	1	3	2	1	1	7	4	3	3	4	4	3	5	4	4	5	5	4	4	4	4	4	4	4	4	5	5	3	3	4	4	4	6	4	5	5	5	挺好的
663	1	2	2	1	3	3	3	4	1	1	1	6	7	5	6	6	5	6	6	6	6	6	5	7	6	7	5	7	6	6	6	6	7	6	6	6	6	6	6	7	7	7	7	无
664	2	1	2	1	2	2	2	1	2	1	1	3	3	3	3	3	3	3	3	3	3	3	3	3	3	3	3	3	3	3	3	3	3	3	3	3	3	3	3	3	3	3	3	无
665	1	2	2	1	4	1	1	3	1	2	1	5	4	4	3	7	7	7	7	7	7	7	4	5	5	5	5	7	4	5	4	3	7	7	7	5	5	5	5	5	5	5	5	无
666	1	2	2	1	2	1	1	2	2	3	1	7	7	7	7	3	4	3	4	5	3	4	5	5	3	4	5	3	4	5	3	5	4	4	4	3	4	5	4	3	4	5	4	无
667	1	2	1	1	2	2	2	5	2	2	4	5	5	5	5	5	5	5	5	5	5	5	5	5	5	5	5	5	5	5	5	5	5	5	5	5	5	5	5	5	5	5	5	暂无
668	1	2	5	1	4	1	1	2	1	1	3	7	6	5	7	4	4	6	5	6	6	5	4	5	5	5	6	5	5	6	5	6	5	4	5	5	7	7	7	6	5	5	5	无
669	1	2	5	1	2	3	3	2	1	1	1	6	6	6	6	6	6	6	6	6	6	6	6	6	6	6	6	6	6	6	6	6	6	6	6	6	6	6	6	6	6	6	6	无
670	2	2	2	1	1	3	3	3	2	3	1	5	5	5	5	3	3	3	3	4	4	4	4	6	6	6	6	6	6	6	6	6	6	6	6	6	6	6	6	7	7	7	7	无
671	1	3	2	1	2	1	1	1	2	3	4	4	4	4	4	4	4	4	4	4	4	4	4	4	4	7	4	4	4	4	4	4	7	4	4	4	4	4	4	4	4	4	4	无
672	2	2	2	1	2	2	2	3	2	3	4	3	1	3	5	4	5	4	6	4	5	5	4	2	4	4	5	4	3	2	1	1	2	3	2	2	2	2	2	1	1	1	1	我学的是全媒体电商运营，现在都大二下学期了，感觉到现在都没接触过真正的专业课，能不能不要浪费时间了，唯一有个晚上的专业课还是直播，直播运营呢？
673	1	2	3	1	2	1	1	1	1	1	1	4	4	4	4	4	4	4	4	4	4	4	4	4	4	4	4	4	4	4	4	4	4	4	4	4	4	4	4	4	4	4	4	无
674	2	2	5	1	3	2	1	2	2	1	1	7	7	7	7	7	7	7	7	7	7	7	7	7	7	7	7	7	7	7	7	7	7	7	7	7	7	7	7	7	7	7	7	无
675	1	2	5	1	2	2	2	3	2	2	1	7	7	1	7	7	7	7	4	7	7	7	7	7	7	7	7	7	7	7	7	7	7	7	7	7	7	7	7	7	7	7	7	无
676	2	2	2	1	4	1	2	2	1	1	1	5	7	4	6	4	4	5	4	4	6	6	6	5	7	6	6	7	4	5	5	6	4	5	7	6	6	7	7	6	6	5	6	无
677	2	2	2	1	4	1	2	1	2	2	1	5	5	5	5	4	4	4	4	4	4	4	4	4	4	4	4	4	4	4	4	4	4	4	4	4	4	4	4	4	4	4	4	直播实操
678	2	2	2	1	2	1	1	3	2	1	1	4	5	5	5	5	5	5	3	4	3	5	3	3	5	3	4	5	3	4	5	6	3	5	4	5	3	4	4	5	4	6	6	wu
679	2	2	2	2	1	2	2	1	1	1	1	7	7	7	7	7	7	7	7	7	7	7	7	7	7	7	7	7	7	7	7	7	7	7	7	7	7	7	7	7	7	7	7	无
680	2	2	2	1	2	3	3	1	1	1	2	7	7	7	7	7	7	7	7	7	7	7	7	7	7	7	7	7	7	7	7	7	7	7	7	7	7	7	7	7	7	7	7	无
681	2	2	2	1	2	2	3	5	2	2	1	7	7	6	4	7	5	5	7	6	4	5	4	4	4	4	4	6	4	5	4	5	5	4	3	6	5	4	5	5	5	4	4	无
682	2	1	1	1	4	1	1	5	1	1	1	7	7	7	7	7	7	7	4	4	4	4	4	4	4	4	4	4	4	4	4	4	4	4	4	4	4	4	4	4	4	4	4	🈚️
683	2	2	2	1	2	2	2	2	2	2	2	4	4	4	4	4	4	4	4	4	4	4	4	4	4	4	4	4	4	4	4	4	4	4	4	4	4	4	4	4	4	4	4	无
684	1	2	2	1	2	1	1	1	1	3	3	5	5	5	5	5	5	5	5	5	5	5	5	5	5	5	5	5	5	5	5	5	5	5	5	5	5	5	5	5	5	5	5	无
685	2	2	2	2	4	1	1	2	2	3	1	5	5	5	5	5	5	5	4	5	5	4	5	5	4	5	4	5	4	5	3	5	5	5	5	5	5	5	5	5	5	5	5	无
686	1	3	2	1	3	2	2	3	2	3	1	4	4	4	4	4	4	4	4	4	4	4	4	4	4	4	4	4	4	4	4	4	4	4	4	4	4	4	4	4	4	4	4	无
687	1	2	2	1	1	3	3	5	2	2	3	7	5	5	5	6	4	5	5	4	5	4	5	5	5	5	5	5	5	4	5	4	6	4	6	5	4	5	5	5	5	5	5	目前暂无
688	1	2	2	1	2	2	1	5	2	3	4	3	2	2	2	3	3	4	4	3	4	3	4	4	5	4	4	3	4	5	3	3	5	4	4	5	3	4	5	4	4	3	4	无
689	1	2	2	1	2	1	1	3	1	2	4	5	5	5	5	5	5	5	5	5	5	5	5	5	4	5	6	5	5	4	5	5	4	5	6	5	5	4	5	5	5	5	6	多实践
690	1	1	1	1	3	1	1	5	2	2	4	3	3	3	3	3	3	3	3	3	3	3	3	3	3	3	3	3	3	3	3	3	3	3	3	3	3	3	3	3	3	3	3	无
691	2	2	2	1	4	2	2	3	2	1	4	3	3	3	3	4	5	4	4	7	7	7	7	7	6	5	5	7	4	4	4	5	5	5	5	4	5	5	7	7	7	7	7	职业规划
692	2	2	5	1	3	1	1	1	1	1	1	4	5	4	4	4	2	5	4	5	4	4	6	5	6	6	6	5	5	5	5	5	5	5	5	6	5	5	6	5	5	6	6	无
693	2	2	2	1	3	1	1	3	1	1	1	7	7	7	6	5	5	5	5	5	5	5	5	6	6	6	6	6	6	6	6	6	6	6	6	4	3	3	3	4	4	3	4	无
694	2	2	2	1	3	1	1	1	2	3	3	2	2	3	5	3	3	6	2	4	4	4	4	4	4	4	4	4	4	4	4	4	4	4	3	4	5	4	4	4	3	4	4	有老师单纯念老旧ppt，上课收获不多，可以多课外实践
695	2	2	2	1	3	3	3	3	2	1	4	6	6	6	6	6	6	6	6	6	6	6	6	6	6	6	6	6	6	6	7	7	7	7	7	7	7	7	7	7	7	7	7	无
696	2	3	2	1	4	3	2	1	1	1	1	7	4	7	5	6	6	6	6	6	6	6	6	6	5	6	6	6	6	6	5	5	6	6	6	6	5	5	5	6	6	5	6	无
697	2	2	2	1	4	1	1	5	2	2	1	4	5	4	5	3	3	5	5	5	5	6	5	6	6	7	7	7	4	7	6	3	6	3	5	5	6	7	7	5	5	5	6	无
698	1	2	3	1	4	1	1	5	2	2	2	2	4	4	2	4	2	4	4	2	4	4	4	4	2	4	2	4	2	4	2	4	3	4	3	4	2	4	3	4	4	4	4	无
699	2	2	2	1	4	1	1	2	1	2	1	4	2	4	4	4	4	4	4	5	3	4	4	4	2	4	4	5	4	4	3	3	5	5	5	5	5	5	5	4	3	4	4	出去实习 多进行实操 而不是空讲
700	2	2	2	1	4	1	1	3	1	3	1	2	1	1	6	1	1	7	1	1	1	1	2	4	2	1	2	2	1	2	1	1	1	1	1	1	1	1	3	2	2	2	2	无
701	2	2	2	1	1	2	2	1	1	1	1	6	6	6	6	6	6	6	6	6	6	6	6	6	6	6	6	6	6	6	6	6	6	6	6	6	6	6	6	6	6	6	6	无
702	2	2	3	1	4	2	2	1	1	1	3	5	5	5	5	4	4	4	4	5	5	5	5	5	5	5	5	5	5	5	5	4	4	4	4	5	5	5	5	5	5	5	5	无
703	1	2	1	1	2	1	1	1	2	3	1	5	6	5	6	5	6	5	6	5	6	5	6	5	6	5	6	5	6	5	6	5	6	5	6	5	6	5	6	5	6	5	6	教学与未来实际工作所需要不符
704	1	2	2	1	2	3	1	1	2	1	3	7	7	7	7	6	6	6	6	6	6	6	6	6	6	6	6	6	6	6	6	6	6	6	6	6	6	6	6	6	6	6	6	无
705	2	2	2	1	4	1	1	3	2	3	4	4	4	4	4	4	4	4	4	4	4	4	4	4	4	4	4	4	4	4	4	4	4	4	4	1	1	1	1	4	4	4	4	无
706	2	1	5	1	2	2	2	1	1	1	4	6	6	6	6	6	6	6	6	6	6	6	6	6	6	6	6	6	6	6	6	6	6	6	6	6	6	6	6	6	6	6	6	无
707	1	2	1	1	3	1	1	3	2	1	1	7	7	7	7	7	7	7	7	7	7	7	7	7	7	7	7	7	7	7	7	7	7	7	7	7	7	7	7	7	7	7	7	。
708	2	3	2	1	3	1	2	2	2	1	1	7	4	6	6	5	6	7	7	6	5	6	7	5	5	5	5	7	7	7	5	1	7	4	5	6	6	6	6	6	6	6	6	无
709	2	1	5	1	3	2	2	3	2	3	1	4	4	4	4	4	4	4	4	4	4	4	4	4	4	4	4	4	4	4	4	4	4	4	4	3	4	4	4	4	4	4	4	无
710	2	2	2	1	4	2	1	3	2	2	1	7	7	4	1	4	4	4	4	6	5	4	5	3	4	3	3	3	3	3	3	2	2	2	2	2	2	2	2	2	2	2	2	无
711	2	3	2	1	4	1	1	3	2	2	4	2	2	2	2	4	4	4	4	4	4	4	4	4	4	4	4	4	4	4	4	4	4	4	4	4	4	4	4	4	4	4	4	无
712	2	2	3	1	4	2	2	1	2	1	3	6	6	5	5	5	5	5	5	5	5	5	5	5	5	5	5	5	5	5	5	5	5	5	5	5	5	5	5	5	5	5	5	无
713	2	2	2	1	1	1	1	1	2	1	3	7	7	7	7	7	7	7	7	7	7	7	7	7	7	7	7	7	7	7	7	7	7	7	7	7	7	7	7	7	7	7	7	希望学校可以提供相关实习工作
714	2	1	5	2	4	1	1	1	2	3	4	7	7	7	7	7	7	7	7	7	7	7	7	7	7	7	7	7	7	7	7	7	7	7	7	7	7	7	7	7	7	7	7	无
715	2	2	2	1	1	1	1	1	1	1	1	7	7	7	7	7	7	7	7	7	7	7	7	7	7	7	7	7	7	7	7	7	7	7	7	7	7	7	7	7	7	7	7	无
716	2	3	2	1	4	1	1	2	1	2	1	7	7	7	7	7	7	7	7	7	7	7	7	7	7	7	7	7	7	7	7	7	7	7	7	7	7	7	7	7	7	7	7	无
717	1	2	1	1	4	1	1	5	2	3	1	1	4	1	3	3	3	3	3	3	3	3	3	3	3	3	3	3	3	3	3	3	3	3	3	7	7	7	7	4	4	4	4	无
718	1	2	3	1	2	3	3	5	1	2	1	6	7	7	5	6	5	6	7	6	5	6	5	7	6	6	6	7	6	7	6	6	5	6	6	6	5	5	5	6	6	5	5	无
719	1	1	1	1	1	3	1	3	2	3	4	4	4	4	4	4	4	4	4	4	4	4	4	4	4	4	4	4	4	4	4	4	4	4	4	4	4	4	4	4	4	4	4	对的对的
720	2	2	2	2	4	1	1	1	1	1	1	6	6	6	6	6	6	6	6	6	6	6	6	6	6	6	6	6	6	6	6	6	6	6	6	6	6	6	6	6	6	6	6	无
721	2	3	2	1	4	2	1	2	2	2	2	4	4	4	4	4	4	4	4	4	4	4	4	4	4	4	4	4	4	4	4	4	4	4	4	4	4	4	4	4	4	4	4	没有建议
722	2	2	2	1	4	2	1	5	2	3	1	4	4	4	4	4	4	4	4	4	4	4	4	4	4	4	4	4	4	4	4	4	4	4	4	4	4	4	4	4	4	4	4	无
723	2	2	2	1	2	2	2	1	1	3	1	7	4	5	4	5	4	4	4	4	4	4	6	4	4	4	4	4	4	4	4	4	4	4	4	4	4	4	4	4	4	4	4	无
724	2	1	2	1	2	1	2	1	1	1	1	7	3	4	7	7	7	4	6	3	3	3	5	4	2	1	3	4	7	4	3	1	6	2	2	3	3	2	2	2	2	4	5	无
725	1	1	3	1	1	3	2	3	2	1	1	4	4	4	4	4	4	4	4	4	4	4	4	4	4	4	4	4	4	4	4	4	4	4	4	4	4	4	4	4	4	4	4	无
726	2	2	2	1	4	2	1	1	2	2	1	7	7	7	7	7	7	7	7	7	7	7	7	7	7	7	7	7	7	7	7	7	7	7	7	7	7	7	7	7	7	7	7	无
727	2	1	5	1	3	1	1	1	2	1	1	3	4	4	4	4	4	4	4	4	4	4	4	4	4	4	4	6	5	5	4	4	4	4	4	5	4	4	4	4	4	4	4	无
728	1	1	2	1	4	1	1	4	2	2	1	2	2	6	7	5	3	4	6	5	5	5	5	5	6	7	6	4	5	5	4	4	5	5	5	3	1	1	2	6	6	6	5	无
729	1	3	2	1	4	1	1	4	2	3	1	7	7	7	7	6	6	6	6	6	6	6	6	6	6	6	6	6	6	6	6	6	6	6	6	6	6	6	6	6	6	6	6	净整些没用的
730	2	2	2	1	4	1	1	4	2	1	1	4	4	4	4	4	4	4	4	4	4	4	4	4	4	4	4	4	4	4	4	4	4	4	4	4	4	4	4	4	4	4	4	无
731	1	2	1	1	4	1	1	2	2	2	1	4	3	5	4	2	2	2	4	2	4	4	4	4	4	4	4	4	4	4	4	4	4	4	4	4	4	4	4	4	4	4	4	无
732	2	2	2	1	4	2	1	2	2	3	1	2	2	2	2	2	2	2	2	2	2	2	2	2	2	2	2	2	2	2	2	2	2	2	2	2	2	2	2	2	2	2	2	。
733	2	3	5	1	4	2	2	3	1	2	1	4	4	4	4	4	4	4	4	4	4	4	4	4	4	4	4	4	4	4	4	4	4	4	4	4	4	4	4	4	4	4	4	无
734	2	2	2	1	4	1	1	3	2	2	1	5	5	5	5	4	5	4	4	4	4	3	3	4	4	5	4	6	4	5	4	4	5	4	5	5	5	5	6	5	5	4	5	增加点实训课程
735	2	2	2	1	4	2	1	3	2	3	1	7	7	6	5	3	2	5	5	4	5	6	7	6	6	6	5	6	5	6	5	4	5	5	6	5	5	5	5	5	5	5	4	无
736	2	2	5	1	4	2	2	2	1	1	1	5	5	5	5	5	7	7	6	5	5	5	5	6	6	6	7	7	7	7	7	7	7	7	7	7	7	7	7	7	7	7	7	一
737	1	3	2	1	1	2	2	3	2	1	1	7	7	7	7	7	7	7	7	7	7	7	7	7	7	7	7	7	7	7	7	7	7	7	7	7	7	7	7	7	7	7	7	哦
738	1	2	1	1	4	1	1	5	2	3	1	4	4	4	4	4	4	4	4	4	4	4	4	4	4	4	4	4	4	4	4	5	4	4	4	4	4	4	4	4	5	4	4	无
739	1	3	2	1	2	1	1	1	1	1	1	6	6	6	6	6	6	6	6	6	6	6	6	6	6	6	6	6	6	6	6	6	6	6	6	6	6	6	6	6	6	6	6	6
740	1	2	5	1	3	1	2	5	1	1	4	5	5	5	5	5	5	5	5	5	5	5	5	5	5	5	5	5	5	5	5	5	5	5	5	5	5	5	5	5	5	5	5	无
741	2	2	1	2	2	2	2	2	2	2	2	7	7	7	7	7	7	7	7	7	7	7	7	7	7	7	7	7	7	7	7	7	7	7	7	7	7	7	7	7	7	7	7	无
742	1	3	2	1	3	4	4	2	2	1	4	7	2	2	6	6	1	6	2	2	2	5	4	4	4	4	4	4	4	4	4	5	3	3	4	2	2	2	2	2	5	2	6	无
743	2	1	5	1	3	2	2	4	2	3	3	1	6	5	1	6	6	4	1	6	5	1	6	5	5	5	2	6	6	5	5	6	5	4	5	6	5	1	1	6	5	1	1	哈哈
744	2	1	2	1	2	1	1	3	2	2	1	5	4	3	3	3	3	3	3	3	3	3	3	3	4	4	4	4	3	2	3	3	3	3	3	5	6	6	6	5	5	5	5	无
745	1	3	2	2	2	4	4	4	1	1	1	6	6	6	7	7	5	5	6	5	6	5	6	5	6	5	6	6	5	6	5	5	6	5	6	6	5	6	5	6	5	6	5	无
746	1	2	3	1	2	4	4	1	2	1	3	7	7	7	7	7	7	7	7	7	7	7	7	7	7	7	7	7	7	7	7	7	7	7	7	7	7	7	7	7	7	7	7	无
747	1	2	3	1	2	2	2	4	1	1	1	7	7	7	7	7	7	7	7	7	7	7	7	7	7	7	7	7	7	7	7	7	7	7	7	7	7	7	7	7	7	7	7	无
748	1	3	2	1	4	1	1	5	1	1	1	7	7	7	7	7	7	7	7	7	7	7	7	7	7	7	7	6	6	6	6	6	7	7	7	7	7	7	7	7	7	7	7	无
749	2	2	2	1	2	1	1	2	1	1	3	7	7	7	7	7	7	7	7	7	7	7	5	4	4	4	4	4	4	4	5	6	5	6	5	6	6	7	6	7	6	5	7	无
750	1	3	5	1	4	1	1	4	1	2	1	5	6	5	6	4	5	4	5	5	5	3	5	4	4	6	5	5	5	4	3	3	5	4	3	5	6	5	5	3	4	4	3	没什么建议
751	2	2	1	1	2	1	1	3	1	1	1	5	5	5	6	5	5	5	5	5	5	5	5	5	5	5	5	4	4	4	4	4	4	4	4	5	5	5	5	6	6	6	6	无
752	2	2	3	1	3	1	1	2	2	2	1	5	5	6	5	5	6	6	6	5	6	5	5	6	6	5	6	6	5	5	5	4	5	4	5	5	5	5	5	6	5	5	5	无
753	1	3	2	1	4	1	1	2	1	2	1	4	4	4	4	4	4	4	4	4	4	4	4	4	4	4	4	4	4	4	4	4	4	4	4	4	4	4	4	4	4	4	4	无
754	2	2	2	1	4	1	1	4	2	3	4	2	2	2	2	2	2	3	4	4	3	4	4	2	2	3	4	3	4	4	3	2	3	2	3	2	3	4	4	3	3	4	4	无
755	2	2	5	2	3	2	2	1	1	1	3	6	6	6	6	6	6	6	5	6	6	6	6	6	6	6	6	6	6	6	6	6	6	7	6	6	6	6	6	6	6	6	6	无
756	1	1	1	1	2	1	1	3	2	2	1	6	6	6	6	6	6	6	6	6	6	6	6	6	6	6	6	6	6	6	6	6	6	6	6	6	6	6	6	6	6	6	6	无
757	2	3	2	1	4	1	3	5	2	1	1	2	3	5	4	4	3	4	4	5	5	4	4	4	3	4	4	4	3	4	4	3	5	4	3	4	4	4	4	5	4	4	4	无
758	1	1	1	2	2	1	1	4	1	2	1	3	3	3	3	3	3	3	3	3	3	3	3	3	2	3	2	2	2	2	2	2	2	2	4	2	2	3	5	2	1	2	2	大一不明确
759	1	1	1	1	4	2	1	1	2	2	1	7	7	7	7	7	7	7	7	7	7	7	7	7	7	7	7	7	7	7	7	7	7	7	7	7	7	7	7	7	7	7	7	无
760	2	2	2	1	3	1	1	1	2	3	1	6	4	3	3	3	3	4	3	5	4	3	3	3	3	5	5	4	4	4	4	3	6	6	4	4	4	4	5	4	4	4	4	没有实践
761	2	1	2	1	4	2	2	2	2	3	1	5	5	5	5	5	5	5	5	5	5	5	5	5	5	5	5	5	5	5	5	5	5	5	5	5	5	5	5	5	5	5	5	无
762	2	1	2	1	2	2	1	1	1	1	3	5	7	3	3	5	5	5	4	5	5	5	5	3	3	4	5	5	5	5	5	5	5	5	5	5	5	4	5	5	3	6	6	无
763	1	1	5	1	4	1	2	3	2	2	1	7	7	7	7	7	7	7	7	7	7	7	7	7	7	7	7	7	7	7	7	7	7	7	7	7	7	7	7	7	7	7	7	无
764	2	1	1	1	1	2	2	2	2	1	1	4	4	4	4	4	4	4	4	4	4	4	4	4	4	4	4	4	4	4	4	4	4	4	4	4	4	4	4	4	4	4	4	无
765	1	3	1	2	2	2	2	3	2	2	1	7	4	4	4	4	4	4	4	4	4	4	4	4	4	4	4	4	4	4	4	4	4	4	4	4	4	4	4	4	4	4	4	无
767	2	1	2	1	2	2	1	2	1	1	1	5	5	5	5	5	5	5	5	5	5	5	5	5	5	5	5	5	5	5	5	5	5	5	5	5	7	5	5	5	5	5	5	无
768	2	1	5	1	4	1	1	1	2	2	1	7	7	7	7	7	7	7	7	7	7	7	7	7	7	7	7	7	7	7	7	7	7	7	7	7	7	7	7	7	7	7	7	无
769	2	1	2	1	2	1	1	1	2	1	1	7	5	7	7	7	7	7	7	7	7	7	7	7	7	7	7	7	7	7	7	7	7	7	7	7	7	7	7	7	7	7	7	无
770	2	1	2	1	4	1	1	5	2	1	1	3	3	3	3	3	3	3	3	3	3	3	3	3	3	3	3	3	3	3	2	3	3	3	3	3	3	3	3	3	3	3	3	无
771	2	1	2	1	4	1	1	1	2	1	1	7	6	6	6	6	6	6	6	7	7	7	7	7	7	7	7	7	7	7	7	7	7	5	7	7	7	7	7	7	7	7	7	无
772	1	1	1	1	2	2	2	1	1	2	1	4	4	4	4	4	4	4	4	4	4	4	4	4	4	4	4	4	4	4	4	4	4	4	4	4	4	4	4	4	4	4	4	无
773	1	1	1	2	2	4	4	4	2	2	2	7	6	7	6	5	5	6	7	6	4	5	5	7	5	3	5	6	5	5	6	6	6	5	5	6	5	5	6	1	7	7	1	物
774	2	1	1	1	1	1	1	1	2	1	1	4	4	4	4	4	4	4	4	4	4	4	4	4	4	4	4	4	4	4	4	4	4	4	4	4	4	4	4	4	4	4	4	无
775	2	2	2	1	4	1	1	1	2	1	1	7	7	7	7	6	6	6	6	5	5	5	5	4	4	4	4	7	6	5	4	4	7	5	7	2	1	1	1	2	3	3	3	无
776	2	2	2	1	4	1	1	3	2	1	3	7	3	7	7	7	7	7	7	7	7	7	7	7	2	7	7	7	7	7	7	7	7	7	7	7	7	7	7	7	7	7	7	无
777	1	2	2	2	4	2	1	1	2	2	1	7	7	7	7	7	7	7	7	7	7	7	7	7	7	7	7	7	7	7	7	7	7	7	7	7	7	7	7	7	7	7	7	实习
778	2	1	5	1	4	1	1	5	2	1	1	7	7	7	7	7	7	7	7	7	7	6	7	5	5	6	6	7	4	7	5	5	6	6	7	7	7	7	7	7	6	6	3	无
779	2	4	2	1	2	2	1	3	1	1	3	5	5	5	6	6	6	6	4	5	4	4	5	6	6	6	6	6	4	5	5	5	4	4	5	6	6	6	6	5	4	5	5	暂无
780	2	4	5	2	4	4	4	5	2	3	3	7	7	7	7	7	7	7	7	7	7	7	7	7	7	7	7	7	7	7	7	7	7	7	7	7	7	7	7	7	7	7	7	无
781	2	4	2	1	4	1	1	2	2	2	3	5	5	5	6	5	6	5	4	3	4	4	5	5	4	4	5	6	5	6	6	6	6	6	6	6	6	6	6	6	6	6	6	无
782	2	2	1	1	1	1	1	1	1	1	1	7	7	7	7	7	7	7	7	7	7	7	7	7	7	7	7	7	7	7	7	7	7	7	7	7	7	7	7	7	6	7	7	无
783	2	1	5	1	4	2	1	3	2	3	1	7	7	7	7	7	7	7	7	7	7	7	7	7	7	7	7	7	7	7	7	7	7	7	7	7	7	7	7	7	7	7	7	无
784	2	4	2	1	2	2	1	1	1	1	3	7	6	4	6	5	5	5	4	5	6	6	7	7	6	6	5	6	7	7	7	6	5	6	7	6	7	5	6	7	7	6	7	无
785	1	1	5	1	2	2	1	2	2	1	1	7	7	7	7	7	7	7	7	7	7	7	7	7	7	7	7	7	7	7	7	7	7	7	7	7	7	7	7	7	7	7	7	无
786	2	1	3	1	4	1	1	1	1	1	4	7	7	7	7	7	7	7	7	7	7	7	7	7	7	7	7	7	7	7	7	7	7	7	7	7	7	7	7	7	7	7	7	有所帮助
787	1	2	1	1	4	1	1	1	1	3	1	3	3	3	3	2	2	2	2	2	2	2	2	2	2	2	2	2	2	2	2	2	2	2	2	2	2	2	2	2	2	2	2	无
788	2	4	2	1	4	1	1	2	2	2	2	5	6	5	5	6	6	5	5	5	5	5	6	6	5	5	6	7	5	5	5	5	6	6	7	6	6	6	6	5	5	5	5	希望多些实践活动
789	2	3	2	1	4	1	1	2	2	1	1	6	6	6	5	5	5	6	6	6	6	6	6	6	6	6	6	6	6	6	6	6	6	6	6	7	6	7	6	7	6	7	6	无
790	2	3	2	1	4	1	1	3	2	3	1	6	6	6	5	6	7	7	6	6	6	6	7	6	6	6	7	6	6	6	6	7	6	6	6	6	6	7	6	6	7	6	6	没有
791	1	1	5	1	2	2	2	3	2	3	4	4	2	2	2	5	5	5	4	5	4	4	4	3	4	5	4	4	3	4	5	3	4	5	6	4	4	4	4	4	4	4	4	无
792	2	3	2	1	4	3	2	3	2	1	3	5	5	5	4	5	5	5	6	6	5	6	4	5	6	5	5	5	5	5	5	5	5	5	5	6	5	6	5	6	5	6	5	没有
793	1	2	2	1	4	1	1	4	2	2	1	5	5	5	5	5	5	5	5	5	5	5	5	5	5	5	5	5	5	5	5	5	5	5	5	5	5	5	5	5	5	5	5	无
794	2	1	2	1	2	2	1	1	2	2	4	4	4	4	4	2	3	4	4	6	6	4	4	7	7	6	7	7	7	7	7	7	7	7	7	7	7	7	7	7	7	7	7	无
795	1	1	1	1	3	2	2	5	2	2	4	2	2	2	2	2	2	2	2	2	2	2	2	2	3	3	2	2	3	3	2	2	2	2	3	2	3	3	2	2	3	3	2	很好
796	1	1	1	1	2	3	1	5	2	2	1	4	4	4	4	4	4	4	4	4	4	4	4	4	4	4	4	4	4	4	4	4	4	4	4	4	4	4	4	4	4	4	4	无
797	2	4	2	1	2	1	1	1	2	3	1	6	6	7	6	6	6	6	6	7	7	6	7	6	7	6	7	6	7	7	6	7	7	7	7	7	7	7	7	7	7	7	7	无
798	2	2	2	1	2	2	2	2	2	1	1	5	5	5	5	5	5	5	5	5	5	5	5	5	5	5	5	5	5	5	5	5	5	5	5	5	5	5	5	5	5	5	5	无
799	1	1	5	2	2	1	1	1	2	2	4	2	2	4	4	5	4	2	3	4	4	5	4	4	5	3	5	4	3	5	5	3	4	4	3	4	4	5	5	4	5	4	3	无
800	2	1	3	1	2	3	3	1	2	1	4	7	7	7	7	7	7	7	7	7	7	7	7	7	7	7	7	7	7	7	7	7	7	7	7	7	7	7	7	7	7	7	7	无
801	2	2	2	1	2	2	2	1	1	2	1	4	4	4	4	4	4	4	4	4	4	4	4	4	4	4	4	4	4	4	4	4	4	4	4	4	4	4	4	4	4	4	4	无
802	2	2	2	1	4	2	2	1	2	1	1	4	4	4	4	4	4	4	4	4	4	4	4	4	4	4	4	4	4	4	4	4	4	4	4	4	4	4	4	4	4	4	4	无
803	1	1	1	1	2	3	3	1	2	1	2	5	4	6	6	6	6	6	6	6	6	6	6	6	6	6	6	6	6	6	6	6	6	6	6	6	6	6	6	6	6	6	7	无
804	2	3	2	1	2	1	1	3	1	2	1	2	2	2	2	2	2	3	3	6	5	5	5	4	4	4	5	4	6	6	7	7	4	6	5	5	5	5	5	5	6	4	5	没
805	2	1	3	1	3	2	1	1	2	2	1	3	2	4	3	4	4	4	4	3	4	4	4	4	4	4	4	4	3	4	4	2	3	2	3	4	3	4	4	5	4	4	4	无
806	2	2	2	1	2	3	3	2	2	2	1	3	3	3	3	3	3	3	3	3	3	3	3	3	3	3	3	3	3	3	3	3	3	3	3	3	3	3	3	3	3	3	3	无
807	2	2	2	1	2	1	1	3	2	1	4	7	7	7	7	7	6	6	5	7	6	6	6	6	7	6	7	7	6	7	6	6	6	6	6	6	6	6	6	7	6	6	7	无
808	2	1	5	1	1	1	1	4	2	2	4	7	7	7	7	7	7	7	7	7	7	7	7	7	7	7	7	7	7	7	7	7	7	7	7	7	7	7	7	7	7	7	7	无
809	1	1	1	1	1	2	1	5	2	3	1	7	7	7	7	4	4	4	4	4	4	4	4	4	4	4	4	4	4	4	4	4	4	4	4	4	4	4	4	4	4	4	4	0
810	1	1	3	1	2	3	3	1	1	3	4	5	5	5	5	5	5	5	5	5	5	5	5	5	5	5	5	5	5	5	5	5	5	5	5	5	5	5	5	5	5	5	5	无
811	2	1	5	2	2	1	1	2	2	1	4	6	5	4	4	4	6	6	4	5	6	4	6	5	6	4	6	5	6	4	6	5	6	5	6	6	5	6	6	5	5	6	5	无
812	2	1	5	2	2	1	1	1	1	1	4	6	6	6	6	6	6	6	6	6	6	6	6	6	5	6	5	5	6	5	6	5	6	5	7	5	4	6	4	6	5	6	5	无
813	2	1	3	2	2	2	2	3	1	1	3	6	6	6	6	6	6	6	6	6	6	5	5	5	4	5	6	6	6	6	6	6	6	5	6	6	4	6	5	5	6	6	6	无
814	2	1	2	1	2	3	2	1	1	1	1	6	2	6	7	4	4	4	5	6	6	6	6	6	6	6	6	6	6	6	6	6	6	6	6	6	6	6	6	6	6	6	6	无
815	2	1	5	1	1	1	1	1	1	1	4	7	7	7	7	7	7	7	7	7	7	7	7	7	7	7	7	7	7	7	7	7	7	7	7	7	7	7	7	7	7	7	7	无
816	1	2	2	1	4	2	1	3	2	3	4	4	4	4	7	4	4	4	4	2	6	2	6	5	5	5	5	6	5	5	5	2	6	2	2	6	6	6	6	5	5	5	5	无
817	2	1	2	1	2	3	3	1	1	1	1	4	4	4	4	4	4	4	4	4	4	4	4	4	4	4	4	4	4	4	4	4	4	4	4	4	4	4	4	4	4	4	4	无
818	2	1	2	1	4	1	2	1	1	1	1	7	7	7	7	7	7	7	7	7	7	7	7	7	7	7	7	7	7	7	7	7	7	7	7	7	7	7	7	7	7	7	7	无
819	2	1	2	1	3	1	1	3	2	1	1	7	4	4	4	4	4	4	4	4	4	4	4	4	4	4	4	4	4	4	4	4	4	4	4	4	4	4	4	4	4	4	4	无
820	2	3	5	1	4	1	1	4	2	2	4	2	1	2	2	1	2	1	2	2	1	1	2	2	1	1	2	2	1	2	2	2	2	1	2	2	2	2	2	2	2	2	2	无
821	2	1	1	1	3	1	1	4	1	1	4	3	3	3	3	3	3	3	3	3	3	3	3	3	3	3	3	3	3	3	3	3	3	3	3	3	3	3	3	3	3	3	3	无
822	2	3	2	1	4	1	1	2	2	1	2	5	4	5	5	5	5	6	5	5	6	5	6	5	5	5	5	5	5	5	5	5	5	5	5	5	5	5	5	5	5	5	5	无
823	2	1	5	1	2	2	2	2	1	1	1	5	6	5	6	5	6	5	6	5	6	5	6	5	6	5	6	5	6	5	6	5	6	5	6	5	6	5	6	5	6	5	6	无
824	2	1	2	1	2	2	2	1	1	1	1	5	5	6	6	5	5	5	5	6	6	6	6	6	6	6	5	6	6	6	6	6	6	6	6	6	6	5	6	6	6	6	6	无
825	2	1	5	1	4	1	1	2	2	2	4	3	3	3	3	3	3	3	3	3	3	3	3	3	3	3	3	3	3	3	3	3	3	3	3	3	3	3	3	3	3	3	3	没有意见
826	2	3	2	1	3	1	1	2	2	2	1	3	3	3	3	3	3	4	4	4	4	4	4	4	4	4	4	4	4	4	4	4	4	4	4	4	4	4	4	4	4	4	4	没有
827	1	1	3	2	4	1	1	3	1	2	1	7	7	7	7	7	7	7	7	7	7	7	7	7	7	7	7	7	7	7	7	7	7	7	7	7	7	7	7	7	7	7	7	无
828	1	1	1	1	4	1	1	1	1	3	1	5	2	2	2	4	3	3	3	5	4	4	4	3	3	3	3	4	4	4	4	2	4	4	4	4	4	4	3	3	3	3	5	多讲讲与就业有关的内容和一些项目
829	2	1	5	1	2	2	3	1	2	1	4	5	3	5	5	5	5	5	5	5	5	5	5	5	5	5	5	6	5	6	3	2	4	5	6	5	5	5	5	5	5	5	5	挺好的 比较有前景
830	2	1	3	1	2	4	4	1	2	1	4	7	7	7	7	7	7	7	7	7	7	7	7	7	7	7	7	7	7	7	7	7	7	7	7	7	7	7	7	7	7	7	7	无
831	2	1	3	1	2	3	1	1	1	1	1	7	7	7	7	7	7	7	7	7	7	5	7	7	7	7	7	7	7	7	7	7	7	7	7	7	7	5	7	7	7	7	7	无
832	2	1	2	1	4	1	1	1	2	1	4	7	7	7	7	7	7	7	7	7	7	7	7	7	7	7	7	7	7	7	7	7	7	7	7	7	7	7	7	7	7	7	7	无
833	1	1	2	1	1	2	2	4	1	3	1	4	4	4	4	4	4	4	4	4	4	4	4	4	4	4	4	4	4	4	4	4	4	4	4	4	4	4	4	4	4	4	4	职业入门教育
834	1	1	2	1	4	1	1	1	1	1	4	7	7	7	7	7	7	7	7	7	7	7	7	7	5	7	7	7	7	7	7	5	7	7	7	6	7	7	7	6	5	5	4	让我可以接触到许多除了课本上以外的知识实操和动手能力
835	2	1	2	1	2	2	1	1	1	2	4	4	2	3	3	4	4	4	5	5	5	5	6	5	5	5	6	5	6	5	4	2	4	3	2	5	4	5	4	5	5	4	5	无
836	1	1	1	1	3	3	1	5	2	2	1	4	2	3	6	4	4	4	4	4	4	4	4	5	4	4	3	4	3	4	2	4	4	4	4	5	5	5	5	4	3	4	5	无
837	2	1	5	2	3	2	2	4	2	1	1	7	7	7	7	7	7	7	7	7	7	7	7	7	7	7	7	7	7	7	7	7	7	7	7	7	7	7	7	7	7	7	7	无
838	2	1	5	1	3	1	1	2	2	2	1	4	4	4	4	4	4	4	4	4	4	4	4	4	4	4	4	4	4	4	4	4	4	4	4	4	4	4	4	4	4	4	4	没有
839	2	1	2	1	2	2	2	1	2	2	1	5	5	5	5	5	5	5	5	5	5	5	5	6	4	6	5	6	5	5	5	4	5	5	5	6	7	7	7	6	6	6	6	无
840	1	1	1	1	4	2	2	1	1	2	3	5	5	5	5	6	6	6	6	6	6	6	6	5	5	5	5	5	5	5	5	5	5	5	5	5	5	5	5	6	6	6	6	无
841	2	1	3	1	4	2	2	5	2	2	4	4	4	4	4	4	4	4	4	4	4	4	4	4	4	4	4	4	4	4	4	4	4	4	4	4	4	4	4	4	4	4	4	无
842	1	1	2	1	3	1	1	3	1	3	1	4	3	5	4	5	6	4	4	5	4	4	4	4	3	4	4	4	3	3	3	3	4	3	4	4	4	4	4	4	4	4	4	没有
843	2	1	2	1	4	1	1	3	1	2	1	4	4	5	4	4	4	4	4	4	4	5	4	4	4	5	4	4	6	6	6	5	6	6	6	6	5	6	6	6	5	5	6	无建议
844	2	1	1	1	2	2	2	2	2	1	4	7	7	7	7	7	7	7	7	7	7	7	7	7	7	7	7	7	7	7	7	7	7	7	7	7	7	7	7	7	7	7	7	无
845	2	1	5	1	4	1	1	1	1	1	4	6	5	7	6	4	5	4	6	7	7	7	6	5	5	7	6	5	5	7	5	5	7	6	7	6	7	7	7	6	6	6	6	实践是检验真理的唯一标准
846	2	1	1	1	3	1	1	1	1	1	1	5	3	6	6	5	5	5	7	7	7	5	5	4	4	4	4	7	7	7	7	3	2	3	4	7	7	7	7	7	7	7	7	无
847	2	1	1	1	2	3	3	4	2	2	4	6	6	6	6	6	6	6	6	6	6	6	6	6	6	6	6	6	6	6	6	6	6	6	6	6	6	6	6	6	6	6	6	无
848	2	1	2	1	4	1	1	1	2	1	1	7	7	7	7	7	7	7	7	7	7	7	7	7	7	7	7	7	7	7	7	7	7	7	7	7	7	7	7	7	7	7	7	有帮助
849	2	1	2	1	3	2	1	2	2	3	3	7	7	7	7	5	4	5	5	6	6	4	5	5	5	5	6	7	5	5	5	4	7	5	7	5	5	4	6	6	6	6	5	无
850	1	1	1	1	1	3	1	3	2	2	1	6	4	5	6	5	4	6	3	4	4	6	6	5	4	6	5	6	3	5	4	3	5	4	4	5	5	5	6	6	4	6	6	无
851	2	1	5	1	4	2	3	2	1	1	1	5	5	5	5	5	5	5	5	4	5	3	4	4	4	6	6	5	5	5	5	5	5	5	5	5	5	5	5	5	5	5	5	无
852	2	1	2	1	3	2	2	3	2	1	1	7	7	7	7	7	7	7	7	7	7	7	7	7	7	7	7	7	7	7	7	7	7	7	7	7	7	7	7	7	7	7	7	无
853	2	2	2	1	3	2	1	1	1	1	1	7	6	6	6	2	6	5	5	6	6	6	5	6	5	4	5	6	5	5	6	6	5	5	6	6	5	5	5	6	5	5	6	。
854	2	1	3	1	3	1	1	3	2	1	1	5	5	5	5	5	5	5	5	5	5	5	5	5	5	5	5	5	5	5	5	5	5	5	5	6	6	6	6	6	6	6	6	无
855	1	1	1	2	4	1	1	3	2	2	2	4	4	4	4	6	5	4	7	4	5	3	3	5	5	5	5	5	5	5	5	5	5	5	5	5	5	5	5	5	5	5	5	无
856	2	1	2	1	3	1	1	2	2	2	4	6	6	6	6	3	3	3	3	3	3	3	3	4	4	5	5	4	3	7	3	3	5	3	3	4	4	3	4	4	4	4	4	无
857	2	1	2	1	4	2	1	2	2	1	1	3	2	3	2	2	2	2	2	2	2	2	2	2	2	2	2	2	2	2	2	2	2	2	2	2	2	2	2	2	2	2	2	专业课程夯实了财会理论基础，实训课提升了账务处理能力。建议增设数字化财务、税务实操课程，增加企业实习机会，更好对接职业发展需求。
858	1	2	3	1	2	1	1	1	1	1	1	7	7	7	7	7	7	7	7	7	7	7	7	7	7	7	7	7	7	7	7	7	7	7	7	7	7	7	7	7	7	7	7	无
859	2	1	2	1	2	3	3	1	1	2	4	5	4	6	5	4	5	5	5	4	4	5	5	5	5	5	5	5	4	4	4	3	6	5	5	5	5	5	5	5	5	5	5	无
860	2	1	2	1	4	1	1	2	2	1	1	5	3	5	4	4	4	4	4	4	4	4	4	4	4	4	4	4	4	4	4	4	4	4	4	4	4	4	4	4	4	4	4	无
861	1	1	5	1	3	1	1	3	2	2	1	5	6	3	6	4	6	6	6	6	6	6	6	6	6	6	6	6	6	6	6	6	6	6	6	6	6	6	6	6	6	6	6	无
862	2	1	3	1	3	2	1	4	2	1	1	4	4	4	4	4	4	4	4	4	4	4	4	4	4	4	4	4	4	4	4	4	4	4	4	4	4	4	4	4	4	4	4	无
863	2	4	4	2	1	4	4	5	2	3	4	7	7	7	7	1	1	1	1	7	7	7	7	1	1	1	1	7	7	7	7	1	1	1	1	7	7	7	7	1	1	1	1	无
864	2	2	2	1	1	3	1	2	1	1	1	7	7	7	7	7	7	7	7	7	7	7	7	7	7	7	7	7	7	7	7	7	7	7	7	7	7	7	7	7	7	7	7	没有
865	2	1	3	1	2	1	2	2	2	1	4	5	5	6	7	5	5	6	5	5	6	5	5	6	5	5	5	5	6	5	5	5	5	5	5	5	5	5	5	6	5	6	6	无
866	1	2	3	1	4	1	1	3	1	3	1	3	3	3	3	1	1	1	1	2	2	2	2	3	2	2	2	2	2	2	2	3	3	3	3	3	3	3	3	3	3	3	3	无
867	2	1	2	1	2	1	1	3	1	1	1	6	5	4	6	4	5	5	5	4	4	4	4	5	5	5	4	5	4	4	4	4	4	4	4	4	4	5	5	5	5	5	5	无
868	2	1	5	1	4	1	1	2	1	1	4	2	1	1	5	2	2	2	3	3	2	4	3	2	2	2	3	5	4	3	2	2	3	2	2	3	3	3	3	4	5	5	4	在职业规划上还是不能有较清晰指导
869	2	1	2	2	4	1	1	1	1	1	1	7	4	7	7	7	7	7	7	7	7	7	7	7	7	7	7	7	7	7	7	7	7	7	7	7	7	7	7	7	7	7	7	多多进行学习
870	2	1	3	1	2	3	3	3	2	1	4	5	5	5	5	5	5	5	5	5	5	5	5	5	5	5	5	5	5	5	5	5	5	5	5	5	5	5	5	5	5	5	5	无
872	2	1	1	1	2	2	2	2	2	1	1	6	6	6	6	4	5	6	5	6	6	3	6	6	6	6	6	6	6	6	6	6	6	6	6	6	6	6	6	6	6	6	6	无
873	2	2	2	1	4	1	1	3	2	1	1	5	4	4	4	4	4	4	4	4	4	4	4	4	4	4	4	4	4	4	4	4	4	4	4	4	4	4	4	4	4	4	4	无
874	2	2	3	1	1	2	1	3	1	3	1	6	5	5	5	5	4	4	5	6	6	5	5	5	5	4	4	5	4	3	4	2	6	3	6	3	3	3	3	3	4	3	3	无
875	1	1	2	1	2	1	1	5	2	1	1	6	6	6	6	6	6	6	6	6	5	6	6	4	5	6	6	7	6	5	4	4	5	6	7	6	6	7	7	6	7	6	5	无
876	1	2	3	1	4	1	1	3	1	2	1	3	4	4	4	4	4	4	4	4	4	4	3	5	4	4	5	5	5	5	4	5	3	4	4	4	4	4	4	4	4	5	5	提升能力
877	1	1	5	1	4	2	1	1	2	1	4	7	1	4	3	2	2	2	2	3	2	2	2	2	2	2	5	7	2	2	1	1	1	1	1	4	2	2	4	5	5	5	5	无
878	2	2	3	1	2	3	3	3	2	1	3	7	7	7	7	7	7	7	7	7	7	7	7	7	7	7	7	7	7	7	7	7	7	7	7	7	7	7	7	7	7	7	7	无
879	2	1	2	1	4	1	1	3	2	3	4	1	1	1	1	1	1	1	1	1	1	1	1	1	1	1	1	1	1	1	1	1	1	1	1	1	1	1	1	1	1	1	1	无
880	1	1	2	2	4	1	1	2	2	2	1	7	4	6	7	3	4	5	5	5	7	4	3	5	6	6	4	4	5	4	3	4	4	5	6	4	3	3	6	6	4	5	3	具体实操的部分太少，应更多地添加具体的项目
881	1	2	3	1	3	1	1	5	2	3	1	5	5	5	5	5	5	5	5	5	5	5	5	5	5	5	5	5	5	5	5	5	5	5	5	5	5	5	5	5	5	5	5	挺好的
882	2	1	2	1	2	2	2	5	2	3	4	5	4	4	4	4	4	4	4	4	4	4	4	4	4	4	4	4	4	4	4	4	4	4	4	4	4	4	4	4	4	4	4	无
883	1	1	3	1	4	1	1	4	2	1	1	7	7	7	7	7	7	7	7	7	7	7	7	7	7	7	7	7	7	7	7	7	7	7	7	7	7	7	7	7	7	7	7	无
884	2	1	1	1	2	1	3	1	2	3	2	6	4	4	5	7	7	7	7	7	7	7	7	7	7	7	7	7	7	7	7	7	7	7	7	7	7	7	7	7	7	7	7	无
885	2	1	2	2	1	4	4	1	1	1	3	7	7	7	7	7	7	7	7	7	7	7	7	7	7	7	7	7	7	7	7	7	7	7	7	7	7	7	7	7	7	7	7	无
886	2	1	2	1	2	1	1	3	2	3	1	4	1	4	6	4	4	4	4	4	4	4	4	4	4	4	4	4	4	4	4	4	4	4	4	4	4	4	4	4	4	4	4	我想学习AI视频制作
887	1	2	3	1	2	1	1	2	2	1	1	7	7	7	7	7	7	7	7	7	7	7	7	7	7	7	7	7	7	7	7	7	7	7	7	7	7	7	7	7	7	7	7	无
888	1	2	3	1	3	1	1	4	2	2	1	4	3	4	6	4	4	4	4	4	4	4	4	5	5	5	5	5	5	5	5	5	5	5	5	5	5	5	5	5	5	5	5	无
889	1	1	5	2	4	1	1	3	1	1	4	4	3	4	3	2	2	2	2	2	2	2	2	2	2	2	2	2	2	2	2	2	2	2	2	2	2	2	2	2	2	2	2	无
890	1	1	2	1	2	1	1	4	1	2	1	4	3	6	4	5	5	6	6	5	7	3	4	4	6	3	3	4	3	6	6	2	7	4	3	7	4	3	7	4	3	4	3	无
891	2	1	2	1	2	2	2	1	2	1	1	7	7	7	7	7	7	7	7	7	7	7	7	7	7	7	7	7	7	7	7	7	7	7	7	7	7	7	7	7	7	7	7	无
892	2	1	5	2	2	3	2	3	1	1	1	5	5	4	4	4	4	4	4	4	4	4	4	4	4	4	4	4	4	4	4	3	3	3	4	4	4	4	4	4	4	4	4	无
893	2	2	3	1	2	2	2	1	1	1	3	7	7	7	7	7	7	7	7	7	7	7	7	7	7	7	7	7	7	7	7	7	7	7	7	7	7	7	7	7	7	7	7	无
894	2	2	2	1	2	1	1	1	2	1	3	6	5	5	5	4	4	5	5	5	4	5	5	6	5	6	5	5	5	6	5	5	6	5	6	6	7	6	6	6	5	6	6	无
895	2	1	2	2	2	2	3	2	1	2	4	5	4	7	7	6	6	6	6	6	6	3	6	4	4	4	5	6	3	6	3	5	5	4	4	4	4	4	4	4	4	4	4	无
896	2	1	2	2	4	2	1	5	2	2	1	4	4	4	4	4	4	4	4	4	4	4	4	4	4	4	4	4	4	4	4	4	4	4	4	4	4	4	4	4	4	4	4	让我学会职场规则
897	1	1	3	1	4	2	2	3	2	3	1	4	4	4	4	4	4	4	4	4	4	4	4	4	4	4	4	4	4	4	4	4	4	4	4	4	4	4	4	4	4	4	4	无
898	1	1	3	2	3	1	1	3	2	1	4	7	7	7	7	7	7	7	7	7	7	7	7	7	7	7	7	7	7	7	7	7	7	7	7	7	7	7	7	7	7	7	7	无
899	2	1	2	2	4	1	1	1	2	1	1	4	4	4	4	4	4	4	4	4	4	4	4	4	4	4	4	4	4	4	4	4	4	4	4	4	4	4	4	4	4	4	4	无
900	2	1	3	1	4	1	1	1	1	1	1	5	5	6	5	5	5	5	5	5	5	5	5	5	5	5	5	7	5	5	5	5	5	5	5	5	5	5	5	5	5	5	5	无
901	2	1	5	1	4	2	2	4	2	2	4	4	2	6	5	5	4	5	5	3	4	5	5	4	4	5	4	5	3	4	1	3	4	3	4	5	4	4	6	4	5	6	4	我希望能开展相关的讲座想去的人可以去听或者是安排一些希活动想参加的人去参加
902	2	1	5	1	2	2	2	2	1	1	4	7	7	7	7	7	7	7	7	7	7	7	7	7	7	7	7	7	7	7	7	7	7	7	7	7	7	7	7	7	7	7	7	无
903	2	1	3	1	2	1	1	2	1	1	1	6	5	4	4	4	4	4	4	5	5	4	5	5	5	5	6	6	5	5	5	4	5	4	5	5	6	6	6	5	5	6	5	多些实践机会
904	2	1	3	1	4	1	1	1	1	1	1	7	7	7	7	7	7	7	7	7	7	7	7	6	6	6	6	5	5	5	5	5	5	5	5	5	5	5	5	5	5	5	5	无
905	2	1	2	2	4	1	1	1	2	1	4	7	7	7	7	7	7	7	7	7	7	7	7	7	7	7	7	7	7	7	7	7	7	7	7	7	7	7	7	7	7	7	7	无
906	2	1	3	1	3	1	2	3	2	2	4	6	5	5	5	6	6	3	6	5	5	5	5	5	5	5	5	5	5	5	5	5	5	5	5	5	5	5	5	5	5	5	5	无
907	2	1	5	1	4	1	1	1	2	1	1	5	5	3	4	4	4	3	3	3	3	3	3	3	3	3	4	4	4	4	4	4	4	4	4	4	4	4	4	4	4	4	4	无
908	2	1	3	1	3	1	1	1	1	1	4	7	7	7	7	7	7	7	7	7	7	7	7	7	7	7	7	7	7	7	5	4	7	7	7	7	5	7	7	7	7	7	5	无
909	1	1	2	2	4	1	1	3	1	1	4	4	4	4	4	4	4	4	4	4	4	4	4	4	4	4	4	4	4	4	4	4	4	4	4	4	4	4	4	4	4	3	4	暂无
910	2	4	2	1	2	2	1	1	2	1	2	7	7	7	7	6	6	6	6	6	6	7	6	6	6	6	6	6	6	7	7	7	7	7	7	7	7	7	7	7	7	7	7	无。
911	2	2	3	1	3	1	1	1	1	1	1	7	7	7	7	7	7	7	7	7	7	7	7	7	7	7	7	7	5	7	6	5	5	5	7	7	7	7	7	7	7	7	7	无
912	2	1	5	2	4	1	1	1	2	1	2	6	4	4	5	4	3	4	4	3	4	4	4	4	3	3	4	4	3	4	3	4	4	4	5	4	4	4	4	4	4	4	4	暂无
913	1	1	3	1	2	1	1	4	2	3	4	1	1	1	1	1	1	1	1	3	3	3	3	4	4	4	4	4	4	4	4	4	4	4	4	4	4	3	4	4	4	4	4	无
914	2	2	2	1	1	3	2	2	2	1	4	7	4	7	7	7	7	7	7	7	7	7	7	7	7	7	7	7	7	7	7	7	7	7	7	7	7	7	7	7	7	7	7	无
915	1	1	2	1	2	3	3	4	2	2	1	3	3	3	3	3	3	3	3	3	3	3	3	3	3	3	3	5	4	3	4	3	4	3	3	4	5	4	4	4	3	3	3	增加实践课
916	1	1	5	1	2	1	1	5	2	2	4	5	5	5	6	6	5	6	6	6	6	6	6	6	5	6	6	7	6	6	6	6	6	6	6	6	6	6	6	6	6	6	6	无
917	2	1	2	2	2	2	3	1	1	1	1	5	3	3	3	3	2	2	2	3	2	2	3	3	3	3	3	4	3	3	3	3	5	3	4	3	3	3	3	3	3	3	3	无
918	2	1	5	1	4	3	2	2	2	2	1	5	4	5	4	5	6	6	5	4	5	5	6	6	5	4	3	6	3	6	4	6	5	5	4	5	5	4	5	5	5	6	5	无
919	2	2	5	1	4	1	1	3	2	3	1	7	1	6	6	6	6	6	6	6	6	6	6	6	6	6	6	6	6	6	6	6	6	6	6	6	6	6	6	6	6	6	6	无
920	2	1	5	1	3	1	2	2	1	1	4	4	4	4	4	4	4	4	4	4	4	4	4	4	4	4	4	4	4	4	4	4	4	4	4	4	4	4	4	4	4	4	4	无
921	2	1	3	1	4	1	1	1	1	1	1	4	4	3	4	3	4	5	4	5	5	5	4	4	4	4	5	5	4	4	4	4	5	4	4	4	5	5	5	4	3	4	3	无
922	1	1	5	2	2	3	3	3	2	2	2	4	4	4	4	4	4	4	4	4	4	4	4	4	5	4	5	5	5	5	5	5	4	5	4	4	5	4	4	4	5	5	5	无
923	2	1	2	1	2	2	3	4	2	1	4	4	3	5	4	4	4	4	4	4	4	4	4	4	4	4	4	4	4	4	4	4	4	4	4	4	4	4	4	4	4	4	4	无
924	1	1	2	1	3	1	1	3	1	2	1	4	4	4	4	4	4	4	4	4	4	4	4	4	4	4	4	4	4	4	4	4	4	4	4	4	4	4	4	4	4	4	4	无
925	2	1	2	2	4	1	1	1	2	1	1	3	4	3	2	3	3	4	4	3	4	3	4	3	3	3	3	4	3	3	3	2	4	3	5	4	3	2	3	4	4	4	4	希望多些实践课程，多上手试试
926	2	2	2	1	4	1	1	1	1	2	3	1	1	1	1	1	1	1	1	1	1	1	1	1	1	1	1	1	1	1	1	1	1	1	1	1	1	1	1	1	1	1	1	无
927	1	1	1	1	4	2	2	1	1	1	1	7	7	7	7	7	7	7	7	7	7	7	7	7	7	7	7	7	7	7	7	7	7	7	7	7	7	7	7	7	7	7	7	对
928	1	1	2	1	2	3	1	3	2	1	1	3	3	5	4	3	3	3	3	3	3	3	4	5	4	3	4	4	3	4	2	2	3	3	3	3	3	3	4	4	4	3	3	无
929	2	1	5	1	4	1	1	2	2	2	1	3	3	3	3	4	4	3	3	3	3	3	3	2	2	3	3	3	2	3	3	3	3	3	3	6	6	5	5	4	4	4	5	好
930	2	2	5	1	2	3	2	1	1	2	1	4	4	4	4	4	4	4	4	4	4	4	4	4	4	4	4	4	4	4	4	4	4	4	4	4	4	4	4	4	4	4	4	无
931	2	1	3	1	4	2	1	3	1	3	4	4	6	6	5	6	6	6	6	6	6	6	6	6	6	6	6	6	6	6	6	6	6	6	6	6	6	6	6	6	6	6	6	没有意见
932	2	1	2	1	4	1	1	4	1	1	1	6	4	4	3	5	3	5	5	5	5	3	5	6	5	5	6	5	4	5	2	3	6	6	5	5	5	5	5	5	5	5	5	无
933	2	1	2	2	4	1	1	1	2	1	4	3	2	3	7	3	4	4	5	3	4	4	7	7	7	7	7	7	7	7	7	2	5	4	4	7	7	7	7	5	4	5	3	无
934	2	2	3	1	4	2	1	3	1	1	3	7	7	7	7	7	7	7	7	7	7	7	7	7	7	7	7	7	7	7	7	7	7	7	7	7	7	7	7	7	7	7	7	无
935	2	1	5	1	1	1	1	2	2	2	1	7	7	7	7	7	7	7	7	7	7	7	7	7	7	7	7	7	7	7	7	6	6	6	6	6	6	6	6	6	6	6	6	无
936	2	1	1	1	4	1	1	1	2	2	1	4	4	4	4	4	4	4	4	4	4	4	4	4	4	4	4	4	4	4	4	4	4	4	4	4	4	4	4	4	4	4	4	无
937	1	1	5	1	3	2	1	2	2	2	1	5	5	5	5	6	6	5	6	7	6	7	7	7	6	7	7	7	6	6	6	7	7	7	6	7	7	7	7	7	7	7	7	挺好的
938	2	2	2	1	4	1	1	3	2	1	1	1	1	1	1	7	7	7	7	7	7	7	7	7	7	7	7	7	7	7	7	7	7	7	7	7	7	7	7	7	7	7	7	无
939	2	1	5	1	4	2	2	5	2	2	1	6	6	6	6	6	6	6	6	6	6	6	6	6	6	6	6	6	6	6	6	6	6	6	6	6	6	6	6	6	6	6	6	无
940	1	1	5	1	4	1	1	3	2	1	4	3	3	3	3	4	4	4	4	4	4	4	4	4	4	4	4	4	4	4	4	4	4	4	4	4	4	4	4	4	4	4	4	无
941	1	1	1	1	2	1	3	1	1	1	1	7	7	7	7	7	7	7	7	7	7	7	7	7	7	7	7	7	7	7	7	7	7	7	7	7	7	7	7	7	7	7	7	无
942	1	1	2	1	2	2	2	4	2	1	1	4	4	5	7	4	2	4	4	4	5	5	5	5	6	6	4	5	4	4	5	4	4	4	5	4	4	4	4	5	5	5	4	无
943	2	1	5	1	4	2	1	1	2	1	1	5	4	4	4	4	4	4	4	4	4	6	6	6	4	5	7	7	4	5	6	4	4	4	4	6	7	7	4	5	3	5	4	目前本专业的课程设置为我搭建了扎实的专业知识体系，实践环节也让我初步掌握了岗位所需的基础技能，为职业规划的落地提供了核心支撑。 但同时也存在一些不足：一是部分课程内容与行业最新需求脱节，实用性有待提升；二是实践环节多为校内实训，缺乏真实职场的深度历练；三是职业规划相关指导不够个性化，难以匹配不同学生的职业方向。 建议：1. 及时更新课程内容，增加行业前沿与岗位实操相关内容；2. 深化校企合作，提供更多真实项目实习机会；3. 完善个性化职业指导，针对性提升求职与职业发展能力。
944	2	1	3	2	3	1	1	3	2	1	4	7	7	7	7	7	7	7	7	7	7	7	7	7	7	7	7	7	7	7	7	7	7	7	7	7	7	7	7	7	7	7	7	无
945	1	1	1	1	2	1	1	3	2	2	2	6	6	6	6	6	6	6	6	6	6	6	6	6	6	6	6	6	6	6	6	6	6	6	6	6	6	6	6	6	6	6	6	无
946	2	2	3	1	2	2	2	1	1	2	1	6	6	6	6	4	4	4	4	5	6	5	5	6	6	5	6	7	6	6	6	4	6	6	6	6	4	4	4	6	4	5	6	无
947	2	1	5	1	3	1	1	5	2	2	1	3	3	3	3	3	3	3	3	3	3	3	3	3	3	3	3	3	3	3	3	3	3	3	3	3	3	3	3	3	3	3	3	无
948	2	1	2	1	3	1	3	3	2	1	1	5	5	5	5	5	5	5	5	5	5	5	5	5	4	5	5	5	5	5	5	5	5	5	5	5	4	5	4	5	5	6	5	相关的教学设备可以多一些
949	2	2	5	1	2	3	2	3	2	2	1	4	4	4	4	4	4	4	4	4	4	4	4	4	4	4	4	4	4	4	4	4	4	4	4	4	4	4	4	4	4	4	4	无
950	2	2	3	1	4	1	1	2	2	2	1	7	7	7	7	7	7	7	7	7	7	7	7	7	7	7	7	7	7	7	7	7	7	7	7	7	7	7	7	7	7	7	7	无
951	1	1	3	2	4	1	1	3	2	2	4	4	4	4	4	4	4	4	4	4	4	4	4	4	4	4	4	4	4	4	4	4	4	4	4	4	4	4	4	4	4	4	4	无
952	2	1	2	2	4	2	2	3	2	1	4	7	4	7	7	7	7	7	7	7	6	7	7	6	6	6	6	7	7	7	7	1	7	2	7	7	7	7	7	7	7	7	7	无
953	2	1	5	2	2	2	1	1	1	1	4	3	4	4	3	4	4	4	4	4	4	4	4	4	4	4	4	4	4	4	4	4	5	3	4	4	5	5	5	4	4	4	3	无
955	1	3	1	1	4	1	1	4	2	2	1	3	4	3	3	4	4	4	4	4	3	4	4	4	4	5	4	4	5	5	3	3	3	5	4	3	5	3	5	3	4	4	3	无
956	1	3	2	1	2	3	2	5	1	1	1	7	5	5	5	4	5	5	5	4	4	4	4	4	4	4	4	5	4	5	4	4	5	6	4	3	3	5	5	4	5	3	5	无
957	2	1	1	1	3	2	2	3	1	2	1	4	4	4	4	4	4	4	4	4	4	4	4	4	4	4	4	4	4	4	4	4	4	4	4	4	4	4	4	4	4	4	4	无
958	2	1	1	1	2	2	2	1	1	3	4	3	2	4	2	1	2	2	1	2	2	1	2	2	1	2	2	2	1	2	1	1	1	1	1	2	2	2	2	2	2	2	2	无
959	2	2	3	1	4	1	2	3	2	2	1	6	2	5	2	3	1	3	2	4	2	2	2	1	4	4	3	3	3	2	2	1	4	2	2	3	2	2	3	3	2	3	2	无
960	1	1	1	1	4	1	1	3	1	2	4	4	4	4	7	6	6	6	6	6	6	6	6	6	6	6	6	6	6	6	6	6	6	6	6	6	6	6	6	6	6	6	6	无
961	2	2	3	1	2	3	3	1	1	1	3	7	7	7	7	7	7	7	7	7	7	7	7	7	7	7	7	7	7	7	7	7	7	7	7	4	4	4	4	7	7	7	7	无
963	2	1	1	1	4	1	1	3	2	3	1	5	2	5	5	5	5	5	5	3	5	5	5	3	5	4	4	4	4	4	4	4	4	4	4	4	4	4	4	4	4	4	4	挺好的
964	2	1	3	1	1	3	3	1	1	1	2	6	6	6	6	6	6	6	6	6	6	6	6	6	6	6	6	6	6	6	6	6	6	6	6	6	6	6	6	6	6	6	6	暂无
965	2	1	3	1	2	3	2	1	1	1	1	4	4	4	5	6	5	6	5	6	5	6	5	6	5	6	5	6	5	6	5	6	5	6	5	6	5	6	5	6	5	6	5	无
966	1	1	1	1	4	2	2	3	2	3	4	4	4	4	4	4	4	4	4	4	4	4	4	4	4	4	4	4	4	4	4	4	4	4	4	4	4	4	4	4	4	4	4	无
967	1	1	1	1	4	1	1	3	2	1	1	7	7	7	7	7	7	7	7	7	7	7	7	7	7	7	7	7	7	7	7	7	7	7	7	7	7	7	7	7	7	7	7	无
968	1	1	1	1	2	1	3	3	2	2	1	5	5	5	5	5	5	5	5	5	5	5	5	5	5	5	5	5	5	5	5	5	4	5	5	5	4	5	4	4	4	4	4	无
969	2	1	1	1	4	1	1	2	1	1	1	7	7	7	4	2	2	2	2	4	4	4	4	4	4	4	4	4	4	4	4	4	4	4	4	4	4	4	4	4	4	4	4	无
970	2	1	3	1	1	3	3	1	1	1	1	7	7	7	7	7	7	7	7	7	7	7	7	7	7	7	7	7	7	7	7	7	7	7	7	7	7	7	7	7	7	7	7	有帮助
971	2	1	3	1	4	2	2	1	1	1	1	7	5	4	5	6	5	7	5	5	3	5	6	6	5	6	6	5	6	6	7	6	7	6	6	6	6	5	6	6	6	6	6	无
972	1	3	2	1	2	1	1	1	1	2	2	1	1	1	1	1	1	1	1	1	1	1	1	1	1	1	1	1	1	1	1	7	7	7	7	7	7	7	7	7	7	7	7	没有价值
973	1	1	1	1	2	1	1	4	2	1	1	7	7	7	7	7	7	7	7	7	7	7	7	7	7	7	7	7	7	7	7	7	7	7	7	7	7	7	7	7	7	7	7	无
974	2	1	1	1	4	2	1	1	2	2	4	6	6	6	6	6	6	6	4	6	5	4	6	4	5	5	4	6	4	6	5	6	4	5	5	4	3	5	5	5	6	5	4	无
975	2	1	1	1	3	1	1	4	1	1	3	7	7	7	7	7	7	7	7	7	7	7	7	7	7	7	7	7	7	7	7	7	7	7	7	7	7	7	7	7	7	7	7	无
976	2	1	3	1	3	1	1	3	2	2	4	2	4	4	4	4	4	4	4	5	5	5	5	5	5	5	5	5	5	5	5	2	2	2	2	6	6	6	6	6	6	6	6	无
978	2	3	2	1	3	2	1	2	1	2	1	5	5	5	5	5	5	5	5	5	5	5	5	5	5	5	5	5	5	5	5	5	5	5	5	5	5	5	5	5	5	5	5	无
979	1	1	1	1	4	2	2	2	1	2	1	1	1	1	1	1	1	1	1	7	7	7	7	7	7	7	7	7	7	7	7	7	7	7	7	7	7	7	7	7	7	7	7	好
980	1	1	3	1	3	2	2	3	1	1	1	4	4	4	4	4	4	4	4	4	4	4	4	4	4	4	4	4	4	4	4	4	4	4	4	4	4	4	4	4	4	4	4	无
981	1	1	1	1	4	2	2	3	2	3	4	3	3	4	3	3	4	5	4	4	4	3	5	3	5	4	4	4	5	4	5	4	4	4	3	5	5	4	4	3	4	4	4	无
982	2	1	3	1	3	1	2	3	2	2	1	2	3	7	7	7	7	7	7	4	6	4	6	4	5	6	7	5	4	4	4	3	5	4	6	7	7	6	6	4	5	5	4	可以多一些实践活动
983	2	3	2	1	4	3	1	2	2	2	1	5	5	5	5	5	5	5	5	5	5	5	5	5	5	5	5	5	5	5	5	5	5	5	5	5	5	5	5	5	5	5	5	无
984	1	1	1	1	2	1	1	2	2	1	1	7	7	7	7	7	7	7	7	7	7	7	7	7	7	7	7	7	7	7	7	7	7	7	7	4	4	4	4	4	4	4	4	无
985	1	1	3	1	4	1	1	2	1	2	1	5	5	5	5	5	5	5	5	5	5	5	5	5	5	5	5	5	5	5	5	5	5	5	5	5	5	5	5	5	5	5	5	无
986	2	1	3	1	2	3	1	1	1	1	4	4	3	4	4	5	5	5	4	4	4	4	4	4	4	4	4	6	3	4	5	3	4	4	4	5	5	4	5	5	4	4	4	无
987	2	1	1	1	2	1	1	1	1	2	4	6	6	6	6	4	4	4	4	4	4	4	4	4	4	4	4	4	4	4	4	4	4	4	4	4	4	4	4	4	4	4	4	组无
988	2	1	3	1	2	2	2	5	2	1	1	5	5	5	5	5	5	5	5	5	5	5	5	5	5	6	5	6	5	5	5	5	5	5	6	5	5	5	5	5	5	5	5	无
989	1	1	1	1	2	1	1	4	2	1	4	3	2	3	4	3	2	3	3	3	3	3	3	4	3	2	2	4	3	2	2	2	2	2	2	3	2	2	3	3	2	4	3	无
990	2	1	3	1	2	3	3	2	2	2	1	4	2	3	3	4	4	4	5	4	4	3	4	3	3	4	4	4	2	3	3	3	4	4	5	4	4	4	4	4	4	4	5	希望更多实践
991	1	3	2	1	3	1	1	5	2	3	1	3	3	3	3	3	3	3	3	3	3	3	3	4	3	3	3	3	3	3	3	3	3	3	3	3	3	3	3	3	3	3	3	0
992	2	1	3	1	3	2	2	3	2	1	1	5	5	4	5	4	4	5	4	4	4	4	6	5	5	5	4	6	5	4	4	4	5	4	4	4	5	4	6	5	6	6	4	无
993	1	1	1	1	2	2	2	2	2	2	1	7	7	7	7	7	7	7	7	7	7	7	7	7	7	7	7	7	7	7	7	7	7	7	7	7	7	7	7	7	7	7	7	666
994	1	1	1	1	4	1	1	3	2	1	4	7	7	7	7	7	7	7	7	7	7	7	7	7	7	7	7	7	7	7	7	7	7	7	7	7	7	7	7	7	7	7	7	无
995	1	1	3	1	2	4	4	5	2	1	1	5	5	5	5	6	6	6	6	5	4	4	4	4	4	4	4	4	4	4	4	4	3	3	2	5	3	5	5	5	5	5	5	无
996	2	1	1	1	2	3	3	2	2	1	4	5	5	5	5	5	5	5	5	5	5	5	5	5	5	5	5	5	5	5	5	5	5	5	5	5	5	5	5	5	5	5	5	无
997	1	1	1	1	4	1	1	2	2	1	4	1	1	1	1	1	1	1	1	3	3	4	4	3	3	3	3	4	4	4	4	4	4	4	3	5	5	5	5	4	4	5	4	没有
998	2	1	1	1	2	2	1	3	2	1	1	5	5	5	5	4	4	4	4	4	4	4	4	4	4	4	4	4	4	4	4	4	4	4	4	4	4	4	4	4	4	4	4	无
999	1	1	5	2	4	1	1	2	2	1	1	5	1	1	1	1	1	4	1	1	1	1	1	5	5	5	2	7	5	7	5	2	7	7	7	5	3	2	4	6	6	6	6	没有
1000	1	1	1	1	2	2	3	2	1	2	4	3	2	3	4	4	3	3	3	2	4	4	5	6	4	5	5	7	5	5	4	4	4	4	4	6	6	4	7	6	3	4	4	无
1001	1	1	3	1	4	1	1	5	2	3	4	4	4	4	5	3	3	5	3	3	3	3	4	5	5	5	5	5	5	4	4	4	4	4	4	5	5	5	5	5	5	5	5	无
1002	1	1	3	1	1	3	3	1	1	2	4	3	1	4	1	4	4	4	4	5	5	5	5	4	4	5	5	5	5	2	3	2	4	5	4	6	6	6	6	7	7	7	7	五
1003	1	1	3	1	4	1	1	3	2	1	1	5	5	4	6	5	5	5	5	5	5	5	5	6	6	6	6	6	6	6	6	4	6	6	6	6	6	6	6	6	5	4	4	可以帮助我更好的认知自己
1004	2	3	5	1	4	1	1	2	2	1	1	7	7	4	7	3	3	7	4	7	7	7	7	7	7	7	7	7	7	7	7	7	7	7	7	7	7	7	7	7	7	7	7	无
1005	2	1	2	1	2	3	3	1	2	1	1	4	4	4	4	4	4	4	4	4	4	4	4	4	4	4	4	4	4	4	4	4	4	4	4	4	4	4	4	4	4	4	4	无
1006	2	1	5	1	2	2	2	1	1	1	1	7	7	7	7	7	7	7	7	7	7	7	7	7	7	7	7	7	7	7	7	7	7	7	7	7	7	7	7	7	7	7	7	无
1007	1	3	1	1	3	3	3	5	1	1	1	7	7	7	7	7	7	7	7	7	7	7	7	7	7	7	7	7	7	7	7	7	7	7	7	7	7	7	7	7	7	7	7	无
1008	2	1	1	1	2	2	2	1	1	3	4	4	4	4	4	4	4	4	4	4	4	4	4	4	4	4	4	4	4	4	4	4	4	4	4	4	4	4	4	4	4	4	4	无
1009	2	3	2	1	4	1	1	1	2	2	4	5	3	4	5	3	3	3	3	3	3	3	3	4	3	4	4	5	4	4	4	3	4	4	4	4	4	4	4	3	3	3	3	无
1010	1	1	3	1	4	2	2	4	2	3	1	6	6	6	6	5	6	5	6	5	6	6	5	5	5	5	6	5	5	5	6	6	5	5	5	5	5	5	5	5	5	5	5	无
1011	1	1	1	2	2	2	2	2	2	1	1	4	4	4	4	4	4	4	4	4	4	4	4	4	4	4	4	4	4	4	4	4	4	4	4	4	4	4	4	4	4	4	4	无
1012	2	1	5	1	3	2	1	1	2	2	1	6	6	6	6	6	6	6	6	6	6	6	6	6	6	6	6	6	6	6	6	6	6	6	6	6	6	6	6	6	6	6	6	无
1013	1	1	3	1	4	2	2	5	2	2	4	7	7	7	7	7	7	7	7	7	7	7	7	7	7	7	7	7	7	7	7	7	1	1	1	7	7	7	7	7	7	7	7	无
1014	2	1	3	2	4	1	1	1	1	1	1	7	7	7	7	6	5	7	5	5	6	6	6	7	7	7	7	7	4	5	5	5	5	5	7	7	7	7	7	7	7	7	7	无
1015	2	1	5	1	3	1	1	1	1	1	1	4	4	4	4	4	4	4	5	4	5	5	5	5	5	5	5	4	4	4	4	4	4	4	4	4	4	4	4	4	4	4	4	无
1016	2	3	5	1	4	1	1	1	2	2	4	5	5	5	6	5	6	6	5	6	5	6	6	5	6	5	6	6	5	6	5	5	6	5	6	6	6	5	6	5	6	6	5	无
1017	2	3	2	1	2	3	3	1	1	2	4	4	5	3	3	5	4	4	4	4	4	4	4	4	4	4	4	4	4	4	4	4	4	4	4	4	4	4	4	4	4	4	4	无
1018	1	1	3	1	2	3	3	1	1	1	1	7	7	7	7	7	7	7	7	7	7	7	7	7	7	7	7	7	7	7	7	7	7	7	7	7	7	7	7	7	7	7	7	无
1019	1	1	1	1	4	2	1	2	2	1	1	6	5	5	5	5	5	5	5	5	5	5	5	5	5	5	5	5	5	5	5	5	5	5	5	5	6	6	6	6	5	6	5	无
1020	1	3	1	1	4	1	1	1	1	1	1	5	5	5	5	5	5	5	5	6	6	6	5	5	4	4	5	6	5	5	5	5	5	6	5	5	5	5	5	5	5	5	5	无
1021	1	1	1	1	3	1	1	2	1	3	4	4	4	4	4	4	4	4	4	4	4	4	4	4	4	4	4	4	4	4	4	4	4	4	4	4	4	4	4	4	4	4	4	无
1022	1	1	1	1	1	1	1	1	1	1	1	1	1	1	5	1	4	5	4	1	4	4	4	1	4	4	4	2	1	2	2	1	2	2	2	2	2	2	2	1	1	1	1	无
1023	2	3	5	1	3	1	1	1	2	1	1	7	6	6	5	6	5	7	6	6	5	5	5	6	6	5	4	5	6	5	6	4	5	5	6	4	5	5	5	5	5	5	5	无
1024	1	1	1	1	4	2	1	3	1	2	1	7	7	7	7	7	7	7	7	7	7	7	7	7	7	7	7	7	7	7	7	7	7	7	7	7	7	7	7	7	7	7	7	无
1025	2	1	1	1	4	1	1	1	2	1	1	5	3	5	5	2	4	3	4	4	5	4	5	3	4	4	4	6	4	4	3	3	4	3	4	4	4	4	4	5	4	4	3	无
1026	2	2	2	1	3	2	3	3	2	1	1	7	5	6	7	6	7	5	6	7	6	6	6	6	6	6	7	7	6	6	5	7	6	5	6	6	7	6	6	6	7	5	6	无
1027	2	1	5	2	3	1	1	1	2	3	4	4	4	4	4	4	4	4	4	4	4	4	4	4	4	4	4	4	4	4	4	4	4	4	4	4	4	4	4	4	4	4	4	没有
1028	2	1	1	1	4	2	1	1	1	1	1	4	4	4	4	4	4	4	4	4	4	4	4	4	4	4	4	4	4	4	4	4	4	4	4	4	4	4	4	4	4	4	4	无
1029	1	1	1	1	2	2	2	2	2	2	4	4	4	4	4	4	4	4	4	4	4	4	4	3	1	4	3	5	4	4	5	4	7	4	4	4	7	7	7	4	3	4	3	无
1030	1	1	3	1	4	1	2	3	1	1	1	7	7	7	7	7	6	7	6	6	7	6	6	6	6	6	6	7	7	7	7	7	6	7	7	7	6	7	7	6	6	7	6	多一些实践
1031	2	2	2	1	3	1	1	2	1	1	1	5	5	5	5	5	5	5	5	5	5	5	5	5	5	5	5	5	5	5	5	5	5	5	5	5	5	5	5	5	5	5	5	无
1032	2	3	2	1	4	1	1	3	1	1	1	2	2	3	6	5	3	4	5	3	5	4	3	4	4	4	3	6	4	5	6	5	5	3	5	3	5	3	5	4	4	4	4	无
1033	2	1	3	1	4	1	1	3	2	2	1	5	4	6	6	6	4	6	6	7	6	6	6	5	5	5	5	7	4	6	5	2	7	4	5	7	6	6	6	6	6	6	6	这个专业让我对法律有了深刻的见解，可以，再深刻的教学，对标未来的就业。或者职业规划。
1034	2	1	3	1	4	1	3	1	1	1	1	5	2	5	5	5	5	5	5	2	2	2	5	3	2	5	3	7	3	5	4	1	4	3	3	7	7	7	7	7	7	7	4	可以多出去实践吧，比如去法院参观，实地参观等等
1035	2	3	2	1	2	2	2	2	2	2	3	6	5	5	5	5	5	6	6	5	5	5	5	6	4	5	5	7	5	5	4	5	6	5	5	5	5	5	6	5	4	4	4	无
1036	1	1	5	1	4	2	2	2	2	2	4	3	4	4	4	4	4	4	3	3	3	3	4	4	4	4	4	4	4	4	4	4	4	4	4	4	4	4	4	4	4	4	4	无
1037	1	1	3	1	4	1	1	3	2	2	2	7	7	4	7	7	7	7	7	4	4	4	7	7	7	7	7	7	4	4	4	4	7	5	7	7	4	7	7	4	7	7	7	无
1038	2	1	3	1	2	1	1	4	2	2	2	5	4	6	4	5	5	6	5	2	4	4	7	5	4	4	4	6	4	5	4	4	5	3	5	7	7	7	7	5	5	6	4	没有
1039	2	1	3	1	2	3	1	5	2	3	4	3	3	3	3	3	3	2	6	7	7	6	6	4	2	2	5	4	6	3	4	2	7	2	3	4	4	4	5	4	4	4	3	无
1040	1	1	2	1	3	1	1	5	2	1	1	4	4	7	7	4	7	7	4	4	4	4	4	4	7	4	7	7	6	6	4	4	4	4	5	7	7	7	7	6	5	7	7	无
1041	2	1	1	1	4	1	1	3	2	1	1	4	2	3	2	3	3	4	4	3	3	3	3	3	3	3	3	4	3	3	3	3	3	4	3	4	4	4	5	4	4	4	4	无
1042	2	3	2	1	2	3	2	1	1	2	1	4	4	4	4	4	4	4	4	4	4	4	4	4	4	4	4	4	4	4	4	4	4	4	4	4	4	4	4	4	4	4	4	无
1043	2	1	3	1	2	1	1	3	2	3	1	4	4	4	4	4	4	4	4	4	4	4	4	4	4	4	4	4	4	4	4	4	4	4	4	4	4	4	4	4	4	4	4	无
1044	2	1	3	1	3	2	2	2	2	1	4	4	4	4	4	4	4	4	4	4	4	4	4	4	4	4	4	4	4	4	4	4	4	4	4	4	4	4	4	4	5	5	5	无
1045	1	3	1	1	4	3	1	3	1	2	1	4	4	4	4	4	4	4	4	4	4	4	4	4	4	4	4	4	4	4	4	4	4	4	4	4	4	4	4	4	4	4	4	无
1046	1	3	1	1	2	2	1	1	1	2	4	4	4	4	4	4	4	4	4	4	4	4	4	4	4	4	4	4	4	4	4	4	4	4	4	4	4	4	4	4	4	4	4	无
1047	1	3	1	1	4	1	1	2	1	2	1	7	7	7	7	7	7	7	7	7	7	7	7	7	7	7	7	7	7	7	7	7	7	7	7	7	7	7	7	7	7	7	7	无
1048	1	1	3	1	4	1	1	2	1	1	1	2	4	3	2	2	2	2	2	2	2	2	2	2	2	2	2	2	2	2	2	2	2	2	2	2	2	2	2	2	2	2	2	无
1049	1	1	1	2	4	1	1	2	2	1	1	7	7	7	7	7	7	7	7	7	7	7	7	7	7	7	7	7	7	7	7	7	7	7	7	7	7	7	7	7	7	7	7	没
1050	2	1	1	1	4	1	1	1	2	1	1	4	3	5	4	3	3	4	4	4	4	4	7	4	4	4	4	4	4	4	4	4	4	4	4	4	4	4	4	4	4	4	4	无
1051	1	3	1	1	3	1	1	5	2	2	1	5	5	5	5	5	5	5	5	5	5	5	5	5	5	5	5	5	5	5	5	5	5	5	5	5	5	5	5	5	5	5	5	无
1052	2	3	2	1	2	2	1	1	1	1	4	7	7	7	7	7	7	7	7	7	7	7	7	7	7	7	7	7	7	7	7	7	7	7	7	7	7	7	7	7	7	7	7	无
1053	1	1	2	1	2	3	3	3	1	2	1	7	7	7	7	7	7	7	7	7	7	7	7	7	7	7	7	7	7	7	7	7	7	7	7	7	7	7	7	7	7	7	7	无
1054	2	1	2	1	2	1	2	2	1	1	4	3	3	3	3	3	3	3	2	2	2	2	3	2	2	2	2	2	2	2	2	3	2	2	2	2	2	3	3	2	1	1	1	无
1055	2	1	5	2	4	1	1	3	2	2	4	6	5	6	7	6	5	6	5	5	5	6	4	6	5	4	6	6	4	6	4	6	5	4	5	5	6	5	6	6	4	5	5	无
1056	2	1	3	1	4	1	1	2	2	2	2	4	3	5	3	3	3	4	3	4	3	4	3	4	4	3	4	3	4	4	5	4	5	5	5	3	4	5	4	4	4	4	3	无
1057	1	1	5	1	4	1	1	3	1	2	4	5	5	5	5	5	5	5	5	5	5	5	5	5	5	5	5	5	5	5	5	5	5	5	5	5	5	5	5	5	5	5	5	无
1058	2	1	3	1	2	2	2	2	1	1	1	7	7	7	6	6	4	6	4	6	6	5	6	6	7	6	6	7	7	7	6	6	7	7	7	7	7	6	7	7	7	6	7	无
1059	2	3	1	2	4	1	1	4	2	1	4	4	4	4	6	5	6	5	5	5	5	5	5	5	5	5	5	5	5	4	4	4	4	4	4	4	4	4	4	4	4	4	4	五
1061	1	1	1	1	2	3	2	1	1	1	1	7	7	7	7	7	7	7	7	7	7	7	7	7	7	7	7	7	7	7	7	7	7	7	7	7	7	7	7	7	7	7	7	无
1062	2	1	4	1	4	1	1	5	2	2	1	3	3	3	6	3	3	6	3	3	3	3	3	3	3	3	3	3	3	3	3	3	3	3	3	3	3	3	3	3	3	3	3	无
1063	2	1	1	1	1	1	1	1	1	1	1	1	3	1	1	1	3	3	3	1	3	3	5	1	3	4	5	1	3	4	5	1	3	5	4	1	3	5	4	3	2	2	2	无
1064	1	1	3	1	3	1	2	3	2	1	1	4	4	4	4	4	4	4	4	4	4	4	4	4	4	4	4	4	4	4	4	4	4	4	4	4	4	4	4	4	4	4	4	无
1065	1	1	5	1	4	1	1	5	2	3	4	3	2	3	4	4	5	3	5	5	6	5	4	5	5	6	6	4	5	6	7	5	4	5	5	5	5	6	6	4	5	5	5	无
1066	2	1	3	1	4	1	1	1	1	1	1	1	1	1	1	1	1	1	1	1	1	1	1	1	1	1	1	1	1	1	1	1	1	1	1	1	1	1	1	1	1	1	1	无
1067	2	1	1	1	4	1	1	1	1	2	1	4	3	5	4	4	3	5	5	4	4	4	5	4	5	5	5	4	4	4	4	4	5	5	5	5	5	5	5	4	4	5	4	无
1068	2	1	3	1	4	1	1	2	2	1	1	5	5	5	5	5	5	5	5	5	5	5	5	5	5	5	5	6	6	6	6	6	6	6	6	6	6	6	6	6	6	6	6	。
1069	1	3	1	2	4	1	1	2	1	2	4	7	7	7	7	7	7	7	7	7	7	7	7	7	7	7	7	7	7	7	7	7	7	7	7	7	7	7	7	7	7	7	7	无
1070	1	1	3	1	4	1	1	5	1	2	1	2	2	4	7	7	7	7	7	4	4	4	4	4	4	4	4	5	5	4	5	4	3	2	2	7	7	7	7	7	7	7	7	多开展实践
1071	1	1	5	1	1	2	2	4	1	1	1	4	4	4	4	4	4	4	4	4	4	4	4	4	4	4	4	4	4	4	4	4	4	4	4	4	4	4	4	4	4	4	4	无
1072	2	3	2	1	4	1	1	1	1	1	1	7	7	7	7	7	7	7	7	7	7	7	7	7	7	7	7	7	7	7	7	7	7	7	7	7	7	7	7	7	7	7	7	暂时没有
1073	1	1	5	1	2	2	2	3	2	2	4	3	3	3	3	4	3	4	3	3	3	3	3	3	3	3	3	3	3	3	3	3	3	3	3	3	3	3	3	3	3	3	3	无
1075	2	1	5	1	2	2	2	3	2	1	1	7	7	7	7	7	7	7	7	7	7	7	7	7	7	7	7	7	7	7	7	7	7	7	7	7	6	7	7	7	7	7	7	认识不清晰
1076	2	3	2	1	4	1	1	3	1	1	1	4	4	4	4	4	4	4	4	4	4	4	4	4	4	4	4	4	4	4	4	4	4	4	4	4	4	4	4	4	4	4	4	无
1077	2	1	5	2	1	2	2	1	2	1	1	4	4	4	4	4	4	4	4	4	4	4	4	4	4	4	4	4	4	4	4	4	4	4	4	4	4	4	4	4	4	4	4	无
1078	1	1	3	1	2	2	3	2	1	1	2	7	5	7	6	6	5	7	7	7	7	7	7	5	5	7	7	7	6	5	5	5	7	5	5	7	7	7	7	7	6	6	5	无
1079	1	1	5	1	4	1	1	4	2	2	1	6	3	5	4	6	6	5	5	6	6	6	6	5	5	4	4	5	4	4	4	3	4	3	4	6	6	6	6	6	6	6	6	无
1080	2	1	2	1	4	3	2	1	1	1	4	7	5	4	7	4	4	5	5	5	5	5	5	4	4	4	4	7	5	4	5	3	7	6	6	5	5	5	6	5	5	5	4	无
1081	2	1	5	1	2	2	2	3	1	2	1	7	7	7	7	7	7	7	7	7	7	7	7	7	7	7	7	7	7	7	7	7	7	7	7	7	7	7	7	7	7	7	7	无
1082	1	1	5	1	4	1	1	4	2	1	1	6	5	4	4	5	4	4	3	3	3	3	3	3	4	3	4	6	4	3	3	3	2	2	5	6	6	6	6	4	4	4	3	无
1083	1	1	1	1	3	1	1	4	2	1	1	4	4	4	4	3	3	3	3	5	5	6	5	3	4	3	4	3	4	3	5	5	6	5	6	5	4	4	4	5	6	5	6	无
1084	2	3	5	1	4	1	1	3	2	3	1	4	2	4	5	4	4	5	5	4	4	5	5	5	5	5	5	6	3	4	1	1	2	2	5	5	5	5	5	5	5	5	5	无
1085	2	3	2	1	4	1	1	2	2	3	1	5	5	5	5	5	5	5	5	5	5	5	5	5	5	5	5	5	5	5	5	5	5	5	5	5	5	5	5	5	5	5	5	无
1086	1	1	1	1	4	1	1	4	2	2	4	5	2	4	6	3	2	5	5	4	4	2	6	4	4	5	4	6	4	6	2	2	6	6	4	5	4	6	6	4	5	6	4	无
1087	2	3	2	1	2	3	2	4	2	3	4	7	7	7	7	7	7	7	7	7	7	7	7	7	7	7	7	7	7	7	7	7	7	7	7	7	7	7	7	7	7	7	7	无
1088	2	1	5	1	4	1	1	2	2	3	4	5	5	5	6	6	6	5	5	3	4	5	5	5	5	5	5	7	6	6	6	4	7	6	6	7	7	7	7	6	6	6	6	无
1089	1	1	2	2	2	2	4	2	2	2	2	6	6	5	5	5	4	4	4	5	5	5	5	7	5	5	6	4	5	5	5	5	5	5	5	6	5	5	5	6	5	5	5	无
1090	2	3	2	1	4	1	2	1	2	2	3	4	4	3	6	4	3	4	4	4	4	4	4	5	5	6	6	5	4	5	4	3	4	4	5	4	4	5	6	4	4	5	4	无
1091	1	1	1	1	4	2	2	2	1	1	1	7	1	7	7	4	4	4	4	4	4	4	4	4	4	4	4	4	4	5	4	5	5	3	5	5	7	5	4	5	5	4	4	暂时没有
1092	2	4	2	1	4	1	2	4	1	1	3	5	5	5	5	5	5	5	5	5	5	5	5	5	5	5	5	5	5	5	5	5	5	5	5	5	5	5	5	5	5	5	5	无
1093	1	2	2	1	4	1	1	1	1	1	1	7	7	7	7	7	7	7	7	7	7	7	7	7	7	7	7	7	7	7	7	7	7	7	7	7	7	7	7	7	7	7	7	无
1094	2	1	3	1	3	1	1	2	1	1	3	4	5	5	5	4	4	5	4	4	4	4	4	6	6	6	6	7	7	7	4	4	5	7	7	7	7	7	7	7	7	7	7	无
1095	2	3	2	1	4	2	2	1	1	1	4	6	5	6	5	7	6	7	4	5	5	6	6	5	5	6	6	5	6	6	7	6	6	6	6	6	6	6	6	6	6	6	6	无
1096	1	3	5	1	3	2	2	4	1	1	1	5	6	5	6	6	5	5	5	5	6	6	5	5	6	5	6	6	5	5	5	6	6	7	6	7	7	7	7	6	6	7	6	无
1097	2	1	3	1	2	2	2	4	2	1	2	4	4	4	4	4	4	4	4	4	4	3	4	4	5	5	4	4	5	4	4	4	5	4	4	3	4	4	4	4	5	4	4	无
1098	1	3	1	1	2	3	2	1	2	2	1	6	4	7	6	5	5	5	5	6	6	6	6	6	7	7	7	7	7	7	7	7	7	7	7	7	7	7	7	7	7	7	7	无
1099	2	3	2	1	4	1	1	2	2	2	2	5	5	5	5	5	5	5	5	5	5	5	5	5	5	5	5	5	5	5	5	5	5	5	5	5	5	5	5	5	5	5	5	。
1100	2	1	3	1	2	2	2	1	1	2	2	5	5	5	6	6	5	5	4	4	4	5	6	5	5	5	5	5	4	4	4	4	5	5	5	5	5	6	7	5	4	5	5	无
1101	2	1	5	1	4	1	1	3	2	3	1	7	5	5	6	5	5	4	4	6	5	5	6	6	5	5	6	5	5	6	6	5	5	6	5	5	6	4	3	4	6	4	3	无
1102	2	1	3	1	4	1	1	1	2	2	4	5	5	6	6	5	5	5	5	6	5	5	6	6	5	5	5	6	5	5	5	4	6	5	6	6	6	6	6	6	6	6	6	无
1103	1	1	3	1	3	2	2	5	2	1	4	6	6	6	6	6	6	7	6	4	5	6	5	6	7	5	7	7	7	7	7	6	7	6	7	7	6	7	7	7	6	7	7	让我清楚价值定位，提升专业技能
1104	1	2	5	1	2	3	3	2	1	1	1	4	5	5	7	4	4	5	6	5	6	7	5	6	4	5	6	6	6	6	5	6	5	6	5	6	5	6	6	6	5	6	6	无
1105	2	1	3	1	3	2	3	3	1	1	3	4	3	3	4	3	3	5	4	4	4	3	4	4	3	5	4	7	4	4	4	3	4	6	4	5	5	4	5	5	4	5	5	无
1106	2	1	2	2	4	2	2	2	2	1	4	4	4	3	3	4	4	4	4	4	4	4	4	4	4	4	4	4	4	4	4	4	4	4	4	4	4	4	4	4	4	4	4	无
1107	1	1	3	1	1	3	3	1	1	1	4	4	4	4	4	4	4	4	4	4	4	4	4	4	4	4	4	7	7	7	7	7	7	7	7	7	7	7	7	7	7	7	7	无
1108	1	1	3	1	4	1	1	4	2	2	1	3	2	2	7	2	3	3	3	3	3	3	3	3	3	3	3	3	3	3	3	3	3	3	3	3	3	3	3	3	3	3	3	无
1109	2	3	5	2	4	1	1	4	2	1	4	4	4	4	4	4	4	4	4	4	4	4	4	4	4	4	4	4	4	4	4	4	4	4	4	4	4	4	4	4	4	4	4	无
1110	2	3	2	1	2	2	2	2	2	2	1	4	4	4	4	4	4	4	4	4	4	4	4	4	4	4	4	4	4	4	4	4	4	4	4	4	4	4	4	4	4	4	4	无
1111	2	3	2	1	2	3	3	4	2	3	4	7	7	7	7	7	7	7	7	7	7	7	7	7	7	7	7	7	7	7	7	7	7	7	7	7	7	7	7	7	7	7	7	无
1112	2	3	2	1	2	2	3	4	2	1	4	4	4	4	4	4	4	4	4	4	4	4	4	4	4	4	4	4	4	4	4	4	4	4	4	4	4	4	4	4	4	4	4	无
1113	2	1	3	1	3	3	3	3	1	2	4	5	5	5	5	5	5	5	5	5	5	5	5	5	5	5	5	5	5	5	5	5	5	5	5	5	5	5	5	5	5	5	5	无
1114	1	1	3	1	4	1	1	3	2	2	2	2	2	2	2	2	2	2	2	2	2	2	2	2	2	2	2	2	2	2	2	2	2	2	2	2	2	2	2	2	2	2	2	无
1115	1	2	2	2	2	1	1	1	2	3	3	5	5	5	5	5	5	5	5	5	5	5	5	5	5	5	5	5	5	5	5	5	5	5	5	5	5	5	5	5	5	5	5	无
1116	1	3	2	1	4	1	1	4	2	2	1	4	3	4	5	4	3	4	4	3	5	3	4	4	5	4	4	4	4	5	4	4	4	4	4	4	4	5	4	4	5	4	3	无
1117	2	2	2	2	1	4	4	4	2	1	1	7	7	7	7	7	7	7	7	7	7	7	7	7	7	7	7	7	7	7	7	7	7	7	7	7	7	7	7	7	7	7	7	无
1118	2	1	3	1	2	1	1	3	2	1	4	2	1	4	2	1	1	1	1	1	2	1	3	2	1	1	1	6	1	4	2	1	5	4	4	2	2	2	6	1	4	4	2	无，感觉没有方向
1119	2	2	2	1	4	2	1	5	2	1	1	4	4	4	4	4	4	4	4	4	4	4	4	4	4	4	4	4	4	4	4	3	4	3	4	4	3	3	4	3	3	3	3	无
1120	2	1	3	1	4	1	1	1	1	1	1	7	7	7	7	7	7	7	7	7	7	7	7	7	7	7	7	7	7	7	7	7	7	7	7	7	7	7	7	7	7	7	7	都挺好的多参加一些活动
1121	2	1	3	1	4	1	1	5	2	1	4	4	3	4	4	4	3	3	3	3	3	4	4	3	3	3	3	4	4	3	3	2	4	4	4	3	3	4	4	3	3	3	3	无
1122	1	1	5	1	1	2	1	5	2	2	4	4	1	4	5	5	6	4	2	4	6	3	5	5	7	4	5	3	4	4	4	3	4	3	4	4	6	5	6	4	5	4	5	无
1123	1	2	2	1	3	2	2	3	1	1	1	4	3	4	5	3	3	4	3	4	4	4	4	4	4	4	4	4	4	4	4	4	4	4	4	3	3	2	2	4	4	4	4	无
1124	1	2	2	1	4	1	1	4	2	3	3	4	4	4	4	4	4	4	4	4	4	4	4	4	4	4	4	4	4	4	4	4	4	4	4	4	4	4	4	4	4	4	4	无
1125	2	1	3	1	3	1	1	3	2	2	4	5	4	4	5	3	3	3	3	3	3	3	3	3	3	3	3	3	2	3	2	2	3	2	2	3	4	4	4	3	3	3	2	无
1126	2	1	2	1	2	2	1	3	2	2	4	4	5	6	5	7	5	5	5	5	6	6	6	4	5	5	5	5	5	5	5	5	5	5	5	5	5	5	5	5	5	6	5	无
1127	1	2	2	1	2	2	1	3	1	1	2	5	5	5	5	5	5	5	5	5	5	5	5	5	5	5	5	5	5	5	5	5	5	5	5	5	5	5	5	5	5	5	5	无
1128	2	3	2	1	1	3	2	1	2	1	3	1	1	7	7	7	7	7	7	7	7	7	7	7	5	6	7	7	7	5	5	7	5	6	6	7	6	6	6	6	6	6	6	无
1129	2	1	5	1	3	1	1	2	2	2	4	6	5	3	5	4	6	3	5	5	5	4	5	5	4	4	3	5	3	5	5	5	6	5	6	6	6	6	6	6	5	5	6	无
1130	2	3	1	1	4	1	1	1	1	2	4	4	4	4	4	4	4	4	4	4	4	4	4	4	4	4	4	4	4	4	4	4	4	4	4	4	4	4	4	4	4	4	4	挺好的
1131	2	1	5	1	4	1	1	1	2	1	1	4	3	3	3	4	1	4	3	4	3	4	4	4	4	4	4	4	4	4	4	4	4	4	4	4	4	4	4	5	5	5	5	无
1132	2	3	2	1	2	1	1	1	1	1	1	5	5	5	5	5	5	5	5	5	5	5	5	5	5	5	5	5	5	5	5	5	5	5	5	5	5	5	5	5	5	5	5	都很好
1133	2	3	2	1	2	2	2	3	2	2	4	2	2	7	3	5	5	5	5	6	6	6	5	1	1	1	5	6	7	5	3	4	7	4	4	5	5	5	5	6	6	6	6	无
1134	1	1	1	1	4	1	1	2	2	1	4	7	1	1	6	1	1	1	1	1	1	1	1	1	2	1	1	1	1	1	1	1	1	1	1	1	1	1	1	1	1	1	1	无
1135	2	1	1	1	4	1	1	2	2	1	1	7	7	7	7	7	7	7	7	7	7	7	7	7	7	7	7	7	7	7	7	7	7	7	7	7	7	7	7	7	7	7	7	无
1136	1	2	2	1	4	3	2	5	2	3	1	5	5	5	5	5	5	5	5	5	5	5	5	5	5	5	5	3	3	3	3	4	4	4	4	4	4	4	4	4	4	4	4	无
1137	1	2	2	1	2	3	2	3	1	2	1	7	7	7	6	6	5	5	5	5	5	5	5	5	6	6	5	5	6	5	5	6	6	6	7	7	7	7	7	7	7	7	7	无
1138	2	2	5	1	4	2	2	2	2	1	4	4	4	4	4	4	4	4	4	4	4	4	4	4	4	4	4	4	4	4	4	4	4	4	4	4	4	4	4	4	4	4	4	🈚️
1139	2	2	2	1	4	1	2	5	2	1	1	5	4	5	1	4	4	4	4	4	4	4	4	4	4	4	4	4	4	4	4	4	4	4	4	4	4	4	4	4	4	4	4	无
1140	2	3	2	1	2	2	2	3	2	2	1	4	5	5	4	5	5	5	4	5	4	5	4	5	4	5	6	5	4	5	5	5	4	5	5	4	5	5	4	5	4	5	4	。
1141	2	2	2	1	2	1	1	1	1	1	1	6	4	4	5	5	5	5	5	5	5	5	5	5	5	5	5	5	5	5	5	5	5	5	5	5	5	5	5	5	5	5	5	无
1142	1	2	1	2	3	2	3	4	2	1	1	5	5	5	5	5	5	5	5	5	5	5	4	4	4	5	4	4	4	4	4	4	4	4	4	5	5	5	5	5	5	5	5	无
1143	1	2	2	1	4	1	1	4	2	2	1	4	4	4	4	5	5	5	5	4	4	4	4	4	4	4	4	5	5	5	5	5	5	5	5	5	5	5	5	5	5	5	5	无
1144	1	1	2	1	4	1	1	3	2	2	1	4	4	4	4	4	4	4	4	4	4	4	4	4	4	4	4	4	4	4	4	4	4	4	4	4	4	4	4	4	4	4	4	无
1145	2	2	2	1	2	3	3	1	1	1	1	7	7	7	7	7	7	7	7	6	6	6	6	6	6	6	6	7	7	7	7	7	7	7	7	7	7	7	7	7	7	7	7	无
1146	2	1	5	1	2	1	1	5	1	3	4	4	4	4	4	3	3	3	3	4	3	3	3	3	3	3	3	3	3	3	3	2	2	3	3	3	3	3	3	3	3	3	3	少做一些调查问卷
1147	1	1	5	1	4	2	1	4	1	1	1	5	3	4	6	5	5	6	4	3	4	4	4	4	4	5	5	3	4	4	4	3	5	5	5	5	5	5	5	4	5	5	5	无
1148	2	2	5	1	2	1	1	3	2	1	4	5	5	5	5	6	6	6	6	6	6	6	6	5	5	5	5	5	5	5	5	5	5	5	5	5	5	5	5	5	5	5	5	无
1149	1	3	1	1	4	1	1	4	2	1	1	7	7	7	7	7	7	7	7	7	7	7	7	7	7	7	7	7	7	7	7	7	7	7	7	7	7	7	7	7	7	7	7	有帮助
1150	2	2	1	1	4	1	1	4	2	1	4	6	6	6	6	6	6	6	6	6	6	6	6	6	6	6	6	6	6	6	6	6	6	6	6	6	6	6	6	6	6	6	6	无
1151	1	3	2	1	2	2	1	4	2	1	1	4	4	4	4	3	3	5	4	3	3	3	4	4	3	5	3	5	3	3	4	3	4	3	3	3	3	3	3	4	3	3	3	课程脱离现实应用/工作
1152	1	1	3	1	4	1	1	3	2	3	2	2	2	2	6	3	3	3	3	3	3	3	3	3	3	3	3	3	3	3	3	3	3	3	3	3	3	3	3	3	3	3	3	没有
1153	2	1	2	2	3	1	2	4	2	1	1	6	5	3	5	5	5	5	5	5	4	4	6	6	5	5	4	5	4	6	4	5	5	5	5	5	4	5	6	5	5	5	6	无
1154	2	2	3	1	1	1	3	1	1	2	3	4	4	5	4	4	4	4	4	5	5	5	5	4	4	4	4	4	4	4	4	4	4	4	4	5	5	6	5	5	5	5	5	实践和专业有更高的契合度
1155	1	1	1	1	4	1	1	1	1	2	1	7	7	7	7	7	7	7	7	7	7	7	7	7	7	7	7	7	7	7	7	7	7	7	7	7	7	7	7	7	7	7	7	希望大学生学历别贬值
1156	2	1	2	1	2	3	1	4	2	2	4	4	4	4	4	4	4	4	4	4	4	4	5	5	5	5	5	5	5	5	5	5	5	5	5	5	5	5	5	4	4	5	4	无
1157	2	1	3	1	2	2	1	2	1	1	4	7	7	7	7	7	7	7	7	7	7	7	7	7	7	7	7	7	7	7	7	7	7	7	7	7	7	7	7	7	7	7	7	无
1158	2	1	2	1	2	2	2	4	2	1	2	7	7	7	7	7	7	7	7	7	7	7	7	7	7	7	7	7	7	7	7	7	7	7	7	7	7	7	7	7	7	7	7	无
1159	2	1	3	1	4	1	1	5	2	2	1	7	7	7	7	4	4	4	4	4	4	4	4	4	4	4	4	4	4	4	4	4	4	4	4	4	4	4	4	4	4	4	4	无
1160	2	3	2	1	3	2	2	3	2	1	1	5	5	5	5	6	5	5	5	5	6	5	5	5	5	5	5	7	6	5	5	5	5	5	5	5	5	5	5	5	5	5	5	无
1161	2	2	2	1	2	2	2	1	2	2	1	7	7	4	7	4	4	4	6	3	6	6	3	4	4	4	4	7	3	5	3	1	1	7	7	5	4	4	4	4	4	4	4	无
1162	2	1	5	2	2	1	1	3	2	1	1	4	2	3	4	3	3	3	3	3	3	3	3	4	4	5	4	4	4	5	5	2	2	2	4	3	3	2	4	5	5	5	5	无
1163	2	1	2	1	4	1	1	1	2	1	1	6	4	5	5	3	4	4	4	4	5	3	4	6	3	5	5	6	7	6	4	4	5	6	6	4	6	4	5	5	4	4	2	我大概明白一些所学专业所面临的职业，但是我不知道从哪里开始实践去靠近这个职业
1164	1	1	5	1	3	2	2	5	2	3	1	7	7	7	7	7	7	7	7	7	7	7	7	7	7	7	7	7	7	7	7	7	7	7	7	7	7	7	7	7	7	7	7	无
1165	1	3	1	1	4	1	1	2	2	2	1	4	4	4	4	4	4	4	4	4	4	4	4	4	4	4	4	5	5	5	5	5	5	5	5	5	5	5	5	5	5	5	5	1
1166	2	1	2	1	4	1	1	3	2	1	3	7	7	7	7	7	7	7	7	7	7	7	7	7	7	7	7	7	7	7	7	7	7	7	7	7	7	7	7	7	7	7	7	没有
1167	2	3	2	1	4	1	2	3	2	2	1	5	4	3	4	4	5	3	4	5	4	5	2	3	3	3	3	5	2	4	1	2	6	3	4	4	6	4	5	4	4	4	3	面试会问哪些问题，需要先有工作、工资
1168	2	1	2	1	2	2	1	3	1	1	1	5	4	6	6	4	3	4	5	5	6	5	5	4	3	5	5	7	3	4	3	2	6	5	5	4	6	4	5	4	3	3	4	无
1169	1	3	2	1	3	1	1	1	1	1	3	7	7	7	7	7	7	7	7	7	7	7	7	7	7	7	7	7	7	7	7	7	7	7	7	7	7	7	7	7	7	7	7	无
1170	2	2	2	1	2	3	2	1	1	1	1	7	7	7	7	6	7	7	6	6	6	6	6	6	6	4	5	6	6	6	6	6	6	6	6	6	6	6	6	6	6	6	6	1
1171	1	1	5	1	4	2	1	1	1	1	1	4	4	4	4	4	4	4	4	4	4	4	4	4	4	4	4	4	4	4	4	4	4	4	4	4	4	4	4	4	4	4	4	无
1172	2	2	2	1	4	2	1	1	1	1	1	7	7	7	7	7	7	7	7	7	7	7	7	7	7	7	7	7	7	7	7	7	7	7	7	7	7	7	7	7	7	7	7	没有不足
1173	1	3	1	1	4	1	2	2	2	1	1	4	4	4	4	4	4	4	4	4	4	4	4	4	4	4	4	4	4	4	4	4	4	4	4	4	4	4	4	4	4	4	4	无
1174	2	1	3	1	4	2	2	1	1	1	1	6	6	6	6	6	6	6	6	6	6	6	6	6	6	6	6	6	6	6	6	6	6	6	6	6	6	6	6	6	6	6	6	没有
1175	1	1	1	1	3	1	1	1	1	2	4	7	7	7	7	7	7	7	7	7	7	7	7	7	7	7	7	7	7	7	7	7	7	7	7	7	7	7	7	7	7	7	7	无
1176	2	3	2	1	4	2	1	2	1	1	4	7	3	7	7	7	7	7	7	7	7	7	7	7	2	7	7	7	7	7	7	4	7	7	7	7	7	4	7	7	7	7	7	无
1177	1	1	3	2	4	1	1	5	1	2	4	3	2	2	2	2	2	2	2	2	4	2	3	3	3	2	3	3	2	3	2	3	2	3	2	3	2	3	2	2	3	2	3	无
1178	2	1	3	1	4	1	1	3	2	3	4	2	2	2	2	3	3	2	2	2	2	2	3	2	2	2	3	6	3	3	3	2	2	3	2	3	3	3	3	2	3	3	2	无
1179	1	1	1	1	1	3	3	5	2	1	1	3	3	3	3	4	4	4	4	4	4	4	4	4	4	4	4	4	4	4	4	4	4	4	4	4	4	4	4	4	4	4	4	无
1180	2	3	2	1	2	2	2	1	2	1	2	6	5	5	5	4	4	4	4	4	4	4	4	4	5	5	5	4	4	5	5	4	5	5	4	4	5	5	4	4	5	5	4	无
1181	2	3	2	1	4	1	1	3	1	2	1	5	6	6	6	6	6	6	6	6	6	6	6	6	6	6	5	5	5	5	5	5	5	5	5	5	5	4	5	5	5	5	5	无
1182	1	1	2	1	4	1	1	4	2	2	1	4	1	1	6	5	4	3	3	1	1	1	3	3	3	4	3	4	5	3	2	1	2	2	3	3	1	1	4	3	3	5	3	学校根本就没有这个实践，更不会搞科研
1183	2	3	2	1	4	3	1	3	1	2	2	7	7	7	7	7	7	7	7	7	7	7	7	7	7	7	7	7	7	7	7	7	7	7	7	7	7	7	7	7	7	7	7	没有
1184	2	3	2	1	4	2	1	1	1	1	1	5	5	5	5	4	4	4	4	4	4	4	4	5	5	5	5	5	5	5	5	5	5	5	5	6	6	6	6	6	6	6	6	无
1185	2	2	2	1	3	1	1	3	2	1	1	5	5	5	5	5	5	5	5	5	5	5	5	5	5	5	5	5	5	5	5	5	5	5	5	5	5	5	5	5	5	5	5	没有
1186	1	3	2	1	4	2	2	1	1	2	1	7	7	7	7	7	7	7	7	7	7	7	7	7	7	7	7	7	7	7	7	7	7	7	7	7	7	7	7	7	7	7	7	无
1187	2	3	2	1	4	1	1	3	2	1	1	4	4	4	4	4	4	4	4	4	4	4	4	4	4	4	4	4	4	4	4	4	4	4	4	4	4	4	4	4	4	4	4	无
1188	2	1	2	1	4	1	1	3	2	2	1	4	6	3	4	4	3	5	4	4	4	5	4	4	4	4	5	5	5	5	4	5	4	5	4	4	5	5	5	6	3	4	5	无
1189	2	2	1	1	4	2	2	2	2	1	4	7	7	7	7	5	5	6	5	6	5	6	5	6	5	6	5	6	5	6	5	6	5	6	5	6	5	6	5	6	5	6	5	无
1190	2	3	2	1	2	2	2	3	2	1	4	7	7	7	7	7	7	7	7	7	7	7	7	7	7	7	7	7	7	7	7	7	7	7	7	7	7	7	7	7	7	7	7	无
1191	2	3	2	1	2	2	2	2	2	2	2	4	4	4	4	4	4	4	4	4	4	4	4	4	4	4	4	4	4	4	4	4	4	4	4	4	4	4	4	4	4	4	4	。
1192	2	3	2	1	4	1	1	3	2	1	1	1	1	1	1	2	1	1	1	4	2	1	3	2	3	3	3	3	3	3	2	2	2	2	2	3	2	2	2	3	3	3	2	无
1193	2	3	2	1	3	1	1	3	2	3	1	5	4	5	3	6	4	6	3	6	3	6	3	6	3	6	3	6	3	6	3	6	3	5	3	5	3	6	3	5	3	5	5	无
1194	2	3	2	1	4	2	2	5	2	1	4	7	5	6	7	6	6	6	7	6	6	6	6	6	7	6	6	5	6	7	5	5	6	7	5	5	6	6	5	5	6	7	6	无
1195	2	3	2	1	2	2	1	1	1	1	1	3	1	4	7	2	2	2	3	4	2	2	2	2	2	2	4	4	2	1	1	1	1	4	2	1	1	1	1	2	2	2	2	我害怕自己找不到工作
1196	1	3	2	1	3	2	2	3	1	2	1	1	1	4	2	1	1	1	1	4	4	4	1	1	1	1	1	1	1	1	1	1	4	4	4	4	4	1	4	4	4	4	4	无
1197	2	3	2	1	4	1	1	1	2	1	1	6	4	6	6	6	6	6	6	6	6	4	4	6	4	4	4	6	4	5	5	5	5	5	5	5	5	5	5	5	5	5	5	注重实践减少理论
1198	2	3	2	1	2	1	1	1	1	2	2	5	4	4	6	4	5	4	4	4	5	4	6	5	4	4	4	5	5	4	3	3	4	6	4	4	3	4	5	5	5	5	5	无
1199	2	3	2	1	4	1	1	1	2	2	1	4	3	4	6	3	3	4	4	5	4	3	4	4	4	3	5	6	6	6	4	3	4	5	4	3	3	3	4	5	4	5	4	我认为课程设计可以再紧密一些，我想拥有更多的自主学习时间用于备考
1200	2	2	5	1	4	1	1	2	2	2	1	5	4	5	6	4	5	5	7	5	4	5	5	5	4	5	4	4	4	5	3	5	4	5	4	5	6	5	4	4	5	4	4	暂无
1201	1	3	2	1	4	1	1	3	2	3	1	4	5	5	4	4	4	5	4	3	3	4	4	5	4	5	4	5	4	4	5	4	4	4	5	4	4	3	5	5	4	4	3	无
1202	2	3	2	1	3	1	1	2	1	1	4	4	4	4	4	3	3	3	3	5	5	5	5	5	5	5	5	5	5	5	5	5	5	5	5	5	5	5	5	5	5	5	5	无
1203	2	3	2	1	3	2	1	2	2	2	1	5	5	6	6	5	5	6	6	5	4	5	6	4	5	4	6	6	5	6	5	4	5	6	4	6	5	6	5	6	5	5	5	无
1204	2	3	2	1	4	1	1	1	1	2	4	4	4	4	4	4	4	4	4	4	4	4	4	4	4	4	4	7	6	6	6	4	4	4	4	4	4	4	4	4	4	4	4	嗯
1205	2	3	2	1	2	3	3	2	2	2	1	4	4	4	4	3	4	4	3	3	5	3	4	4	3	4	3	3	4	4	4	5	4	3	4	3	4	3	4	5	3	4	4	无
1206	1	1	3	1	4	2	2	2	2	2	2	5	5	5	5	5	5	6	3	4	5	4	5	5	4	5	5	5	4	5	5	5	4	5	5	5	5	6	6	6	5	6	6	继续进步
1207	1	3	2	1	2	3	3	5	2	3	4	4	2	7	7	6	6	6	6	7	7	1	7	7	7	7	7	5	7	1	1	5	5	1	1	1	1	1	5	3	5	5	5	无
1208	2	3	2	1	1	1	2	1	2	2	1	5	3	4	4	4	4	3	3	3	3	3	3	5	3	4	4	4	3	4	4	4	3	4	4	4	3	4	4	4	3	4	4	无
1209	2	2	1	1	4	2	1	1	2	1	4	7	7	7	7	4	7	7	7	5	5	5	5	6	6	6	6	6	6	6	6	6	6	6	6	6	6	6	6	6	6	6	6	无
1210	2	3	2	1	2	1	1	3	2	3	1	5	5	5	5	4	4	4	4	4	4	4	4	4	4	4	4	4	4	4	4	4	4	4	4	4	4	4	4	4	4	4	4	无
1211	2	3	2	1	1	1	1	1	1	3	1	6	6	6	6	6	6	6	6	6	6	6	6	6	6	6	6	6	6	6	6	6	6	6	6	6	6	6	6	6	6	6	6	无
1212	2	3	2	1	4	1	1	3	2	2	1	6	6	6	6	6	5	5	5	5	5	5	5	5	5	5	5	5	5	5	5	5	6	5	5	6	5	5	5	5	5	5	6	无
1213	1	4	2	2	3	2	2	5	1	2	3	7	7	7	7	7	7	7	7	7	7	7	7	7	7	7	7	7	7	7	7	7	7	7	7	7	7	6	7	7	7	7	7	无
1214	1	4	2	2	4	1	1	2	1	1	1	4	4	4	4	4	4	4	4	4	4	4	4	4	3	5	5	5	4	3	3	3	5	4	5	4	4	4	4	4	4	4	4	无
1215	1	3	2	1	4	1	1	5	1	3	1	4	4	4	4	4	4	4	4	4	4	4	4	4	4	4	4	4	4	4	4	4	4	4	4	4	4	4	4	4	4	4	4	无
1216	1	3	2	1	4	1	1	2	1	1	1	7	7	7	7	7	7	7	7	7	7	7	7	7	7	7	7	7	7	7	7	7	7	7	7	7	7	7	7	7	7	7	7	1
1217	1	3	2	2	4	2	1	5	2	2	1	4	3	4	5	3	4	4	4	4	4	4	4	4	4	4	4	4	4	4	4	4	4	4	4	4	4	4	4	4	4	4	4	无
1218	2	3	2	1	2	1	1	3	2	3	1	7	7	7	7	7	7	7	7	7	7	7	7	7	7	7	7	7	7	7	7	7	7	7	7	7	7	7	7	7	7	7	7	有
1219	2	1	3	1	3	1	1	4	2	2	1	7	7	7	7	7	7	7	7	7	7	7	7	7	7	7	7	7	7	7	7	7	7	7	7	7	7	7	7	7	7	7	7	无
1220	2	4	2	2	4	1	1	3	2	2	3	6	5	4	5	5	3	5	5	5	3	5	5	5	4	5	6	5	4	5	5	6	4	5	5	5	6	6	7	5	5	5	4	都很好
1221	2	2	1	1	4	1	1	2	2	3	4	5	5	5	5	5	5	5	5	5	5	5	5	5	5	5	5	5	5	5	5	5	5	5	5	5	5	5	5	5	5	5	5	无
1222	1	3	2	1	4	1	1	3	2	2	1	4	5	5	4	5	5	4	5	6	7	6	6	5	6	5	5	6	5	6	4	5	5	5	5	4	4	4	5	5	4	6	6	无
1223	2	2	1	1	3	1	1	1	2	1	1	6	5	5	5	5	4	4	5	5	5	5	5	5	4	5	5	5	5	5	5	4	4	4	4	5	4	5	4	5	5	5	5	无
1224	2	4	2	2	4	2	1	1	2	2	2	2	5	3	7	3	2	2	2	3	2	2	3	6	4	3	4	3	2	2	2	2	2	3	4	1	2	1	5	2	2	3	2	对于本专业涉及到的相关行业及工作内容了解不足，以致于不确定职业规划，以及AI的迅速发展使我思考本专业的必要性
1225	2	3	2	1	4	1	1	2	2	2	1	5	5	5	4	5	5	5	5	4	5	3	5	5	3	5	5	5	4	4	5	5	4	5	5	5	5	4	5	6	4	4	5	无
1226	2	2	1	2	2	2	2	2	2	2	2	7	5	5	5	3	3	3	4	3	4	4	4	4	4	4	4	5	5	5	5	5	5	5	5	5	5	5	5	5	5	5	5	无
1227	1	1	5	1	4	1	1	4	2	2	2	2	3	2	3	4	3	3	4	3	4	3	4	4	4	4	4	2	4	3	3	5	4	3	3	4	3	4	3	4	3	4	4	无
1228	1	4	2	2	2	1	2	3	1	2	3	7	5	6	7	5	4	7	5	5	5	5	5	5	5	5	5	5	5	6	6	4	6	4	6	7	7	7	7	7	7	7	7	无
1229	1	3	1	1	4	1	1	1	1	1	4	7	7	7	7	7	7	7	7	7	7	7	7	7	7	7	7	7	7	7	7	7	7	7	7	7	7	7	7	7	7	7	7	无
1230	1	3	1	1	4	2	2	3	2	3	1	4	4	4	4	4	4	4	4	4	4	4	4	4	4	4	4	4	4	4	4	4	4	4	4	4	4	4	4	4	4	4	4	无
1231	1	3	2	2	4	1	1	5	1	3	1	7	7	7	7	7	7	7	7	7	7	7	7	7	7	7	7	7	7	7	7	7	7	7	7	7	7	7	7	7	7	7	7	无
1232	2	4	2	2	2	2	1	2	2	2	2	4	4	4	4	4	4	5	4	3	4	5	4	4	5	4	3	4	5	4	4	4	5	4	4	4	3	5	5	4	5	4	4	无
1233	2	1	1	1	3	1	1	1	2	1	2	7	7	7	7	7	7	7	7	7	7	7	7	7	7	7	7	7	7	7	7	7	7	7	7	7	7	7	7	7	7	7	7	无
1234	1	3	1	1	2	3	1	1	1	2	1	4	4	4	4	4	4	4	4	4	4	4	4	4	4	4	4	4	4	4	4	4	4	4	4	4	4	4	4	4	4	4	4	无
1235	1	3	1	1	4	1	1	2	2	2	4	4	4	4	4	5	4	5	4	5	4	5	4	5	4	5	4	4	5	5	4	5	4	5	5	4	5	5	4	4	5	5	4	无
1236	2	4	2	2	3	1	1	4	2	2	2	3	2	5	4	2	2	1	3	3	2	3	3	2	1	2	3	6	2	4	2	1	5	1	5	1	2	2	2	2	1	2	1	可以多一些实践内容
1237	2	4	2	2	4	1	1	3	2	1	1	6	2	6	2	2	2	2	2	6	6	6	2	4	4	4	4	4	4	4	4	2	6	2	4	2	2	2	2	2	2	2	2	无
1238	2	1	5	1	4	1	1	1	1	2	2	6	6	6	6	6	6	6	6	6	6	6	6	6	6	6	6	6	6	6	6	6	6	6	6	6	6	6	6	6	6	6	6	无
1239	1	3	1	1	4	1	1	4	2	1	1	4	6	5	5	4	4	4	4	5	5	6	5	5	5	6	4	5	5	4	5	4	5	5	5	5	6	5	6	5	5	5	5	无
1240	1	1	5	1	4	1	1	1	1	2	4	7	7	7	7	7	7	7	6	6	6	6	6	6	6	6	6	6	6	6	6	6	6	6	6	6	6	6	6	6	6	6	6	无
1241	1	3	1	1	2	2	3	3	2	2	1	5	5	5	3	5	5	5	5	5	5	5	5	5	5	5	5	5	5	5	5	5	5	5	5	4	4	4	4	4	4	4	4	无
1242	1	3	1	1	4	1	1	4	2	1	1	5	4	5	6	5	4	5	6	6	5	6	4	5	6	5	5	5	4	5	6	5	4	5	5	5	6	5	6	5	5	6	4	无
1243	1	3	1	1	4	2	1	1	2	2	4	5	5	4	4	5	4	5	5	5	4	5	4	4	4	4	4	5	5	4	5	5	5	4	5	5	4	4	4	4	4	5	4	大学开设的课程，讲的内容与实际工作中完全不一样
1244	2	3	2	1	2	3	3	2	2	1	1	7	7	7	7	7	7	7	7	7	7	7	7	7	7	7	7	7	7	7	7	7	7	7	7	7	7	7	7	7	7	7	7	无
1245	2	1	5	1	2	2	1	5	2	1	1	7	5	7	7	7	7	7	7	7	7	7	7	7	7	7	7	7	7	7	7	7	7	7	7	7	7	7	7	7	7	7	7	无
1246	2	1	3	1	3	2	2	4	1	1	1	6	6	6	6	6	6	6	6	6	6	6	6	6	6	6	6	6	6	6	6	6	6	6	6	6	6	6	6	6	6	6	6	无
1247	2	4	2	2	2	1	2	3	1	1	1	4	4	4	4	4	4	4	4	4	4	4	4	4	4	4	4	4	4	4	4	4	4	4	4	4	4	4	4	4	4	4	4	无
1248	1	1	1	1	4	1	1	3	2	3	4	4	4	4	4	4	4	4	4	4	4	4	4	4	4	4	4	4	4	4	4	4	4	4	4	4	4	4	4	4	4	4	4	无
1249	1	1	1	1	4	1	1	3	2	1	1	7	7	7	7	5	7	7	7	7	7	7	7	7	7	7	4	7	5	7	4	7	7	7	7	7	7	7	7	7	7	7	4	无
1250	1	3	1	1	4	1	1	3	2	1	4	4	4	4	4	4	4	4	4	4	4	4	4	4	4	4	4	4	4	4	4	4	4	4	4	4	4	4	4	4	4	4	4	无
1251	2	1	5	1	2	3	3	2	2	1	1	2	2	2	2	3	4	3	3	2	2	2	2	3	3	3	3	4	4	4	4	6	6	6	6	6	6	6	6	6	6	6	6	无
1252	1	3	1	1	3	2	3	2	2	2	4	4	4	4	3	4	4	4	4	4	4	4	4	4	4	4	4	5	5	5	5	5	5	5	5	5	5	5	5	5	5	5	5	无
1253	2	2	2	1	4	2	2	1	2	2	1	6	5	6	6	3	4	4	4	5	5	6	4	6	5	4	4	6	4	4	4	5	5	5	5	6	4	5	6	5	5	4	5	无
1254	2	3	2	1	4	1	1	1	1	2	1	4	4	4	4	4	4	4	4	4	4	4	4	4	4	4	4	5	4	4	4	4	4	4	4	4	4	4	4	4	4	4	4	无
1255	1	3	2	1	2	2	1	4	1	3	1	5	2	5	5	5	5	5	5	5	5	5	5	4	6	4	6	5	6	6	6	6	5	6	5	3	2	1	3	6	6	6	6	缺少实习和培训阶段
1256	2	1	2	2	4	1	1	3	2	2	1	2	2	3	4	3	3	3	3	4	4	4	4	3	3	3	3	4	2	3	3	3	4	3	3	3	3	3	3	3	3	4	3	无
1258	2	3	2	2	4	2	1	1	2	2	1	4	4	4	5	4	4	4	5	4	4	4	3	4	4	4	5	4	5	4	4	4	5	4	5	5	4	5	4	4	4	4	4	无
1259	2	1	2	1	4	2	1	3	2	2	1	2	2	3	3	3	2	2	3	2	2	2	2	2	2	2	2	6	2	2	2	1	2	1	1	2	2	1	2	2	2	2	2	无
1260	2	1	1	1	3	1	1	3	2	3	1	4	4	4	4	4	5	5	4	3	3	3	3	4	4	4	4	5	4	3	3	3	5	3	3	5	5	5	6	3	4	4	3	无
1261	2	1	2	1	2	2	2	1	1	1	3	6	6	5	5	5	5	5	5	5	5	5	5	5	5	5	5	6	6	6	6	4	6	6	6	6	6	6	6	6	6	6	6	无
1262	2	3	2	1	4	3	3	3	2	1	1	4	4	4	4	4	4	4	4	4	4	4	4	4	4	4	4	4	4	4	4	4	4	4	4	4	4	4	4	4	4	4	4	。
1263	1	2	2	1	2	1	1	5	2	2	1	5	5	5	5	5	5	5	5	5	5	5	5	5	5	5	5	5	5	5	5	3	3	3	3	5	5	5	5	5	5	5	5	无
1264	1	1	5	1	2	2	2	4	2	1	1	7	7	7	7	7	7	7	7	7	7	7	7	7	7	7	7	7	7	7	7	7	7	7	7	7	7	7	7	7	7	7	7	无
1265	2	1	5	1	3	3	3	1	2	1	4	6	6	6	6	6	6	5	5	5	5	5	6	6	5	5	5	6	6	5	5	5	5	6	6	5	5	5	5	6	6	6	6	无
1266	2	3	2	1	4	2	2	1	2	1	1	4	4	4	4	4	4	4	4	4	4	4	4	5	2	3	2	7	2	5	2	4	4	4	4	4	4	4	4	7	6	6	6	无
1267	1	3	1	1	2	2	2	2	2	3	1	1	1	1	1	1	1	1	1	1	1	1	1	1	1	1	1	1	1	1	1	1	1	1	1	1	1	1	1	1	1	1	1	1
1268	1	3	1	1	2	1	1	3	1	2	1	4	4	4	4	4	4	4	4	4	4	4	4	4	4	4	4	4	4	4	4	4	4	4	4	4	4	4	4	4	4	4	4	无
1269	1	3	2	1	2	1	1	3	2	1	2	5	6	5	6	6	5	6	6	6	5	6	6	5	4	4	6	6	5	5	4	6	4	6	5	6	5	6	6	6	6	5	6	无
1270	1	1	1	1	3	2	2	3	2	2	1	7	7	7	7	7	7	7	7	7	7	7	7	7	7	7	7	7	7	7	7	7	7	7	7	7	7	7	7	7	7	7	7	无
1271	1	1	2	1	4	4	3	3	1	1	1	5	4	4	4	4	4	4	4	4	4	4	4	4	4	4	4	4	4	4	4	4	4	4	4	4	4	4	4	4	4	4	4	无
1273	2	3	2	1	4	1	1	1	2	1	1	7	4	6	6	7	7	4	7	7	7	7	7	5	4	4	7	6	7	5	4	4	6	2	4	4	5	5	5	4	4	4	4	目前没考虑工作打算考研
1274	2	1	5	2	3	2	2	4	2	2	1	6	4	4	4	4	5	5	5	4	5	5	4	4	4	4	4	4	4	4	4	4	4	4	4	4	4	4	4	4	4	4	4	无
1275	2	1	1	1	3	2	3	2	2	2	2	5	4	5	4	4	5	5	4	5	4	4	5	4	6	5	3	5	4	4	3	5	4	4	4	4	4	4	5	5	4	4	3	无
1276	2	1	5	2	4	1	1	3	1	1	1	3	5	4	5	4	5	4	4	4	5	4	5	4	5	4	5	3	5	5	4	3	5	4	3	3	4	5	3	3	4	5	4	没有
1277	2	1	5	1	2	1	1	1	1	2	1	4	5	5	5	4	5	5	5	5	5	5	5	5	5	5	5	5	5	5	5	5	5	5	5	5	5	5	5	5	5	5	5	无
1278	2	1	5	1	3	2	2	2	2	1	4	7	7	7	7	7	7	6	6	6	6	5	6	6	6	6	5	6	5	7	6	4	5	4	5	5	5	4	4	5	6	6	5	无
1279	1	2	1	1	2	1	2	1	2	1	1	7	7	7	7	7	7	7	7	7	7	7	7	6	6	6	7	6	6	6	6	6	7	6	6	7	7	7	6	6	6	6	7	无
1280	1	1	3	1	4	2	1	4	2	1	1	5	5	5	5	5	5	5	5	5	5	5	5	5	5	5	5	5	5	5	5	5	5	5	5	5	5	5	5	5	5	5	5	无
1281	2	1	1	1	3	2	1	2	1	2	1	5	5	5	5	3	4	5	3	3	4	4	4	4	4	4	4	4	4	4	4	4	4	4	4	4	4	4	4	4	4	4	4	无
1282	2	1	1	1	3	1	1	3	1	2	4	3	3	3	3	3	3	3	3	3	3	3	3	3	3	3	3	3	3	3	3	3	3	3	3	3	3	3	3	3	3	3	3	无
1283	2	1	5	1	4	2	1	1	2	2	4	5	4	5	4	5	4	4	4	5	5	4	5	5	5	5	4	4	4	5	4	3	5	5	5	5	5	4	6	5	5	5	4	无
1284	2	1	1	1	2	1	1	2	2	3	1	5	4	4	4	4	4	4	4	4	4	4	4	7	7	3	7	5	2	2	1	1	5	4	4	4	5	4	5	2	4	4	3	无
1285	2	1	3	1	2	3	2	2	1	3	4	3	3	4	4	3	4	4	4	4	4	4	4	5	5	5	5	6	6	7	7	4	4	4	5	5	5	6	5	6	5	5	6	无
1286	2	1	3	1	2	2	3	4	2	1	1	4	4	4	4	4	4	4	4	4	4	4	4	4	4	4	4	4	4	4	4	4	4	4	4	4	4	4	4	4	4	4	4	无
1287	2	1	5	1	3	1	1	3	2	2	1	4	4	4	4	3	5	5	5	6	6	5	5	4	5	5	4	4	5	4	4	4	4	4	5	5	4	4	5	5	4	4	5	无
1288	1	1	1	1	2	1	1	5	1	1	4	7	7	7	7	7	7	7	7	7	7	7	7	7	7	7	7	7	7	7	7	7	7	7	7	7	7	7	7	7	7	7	7	无
1289	2	2	5	1	4	1	1	2	2	2	1	4	4	4	4	3	3	3	3	3	3	3	3	2	3	3	4	3	3	4	3	4	5	3	4	3	4	4	4	3	4	3	4	无
1290	1	1	1	1	4	1	1	4	2	2	1	4	3	4	4	4	5	4	4	4	4	4	4	4	3	5	4	4	4	3	4	4	4	4	5	4	4	4	5	4	4	4	4	无
1291	2	1	5	1	4	2	2	1	2	1	1	7	7	7	7	7	7	7	7	7	7	7	7	7	7	6	6	6	6	7	7	7	7	7	7	7	7	7	7	7	6	6	7	无
1292	1	1	1	1	2	3	2	5	1	2	1	7	1	7	7	5	5	5	4	1	1	1	1	1	1	1	1	1	1	1	1	1	1	1	5	1	3	3	1	6	6	6	7	取消晚自习
1293	1	1	1	2	4	1	1	3	2	3	1	5	2	7	5	4	4	4	4	3	4	4	5	5	5	4	5	5	2	7	5	4	4	4	4	7	7	5	5	6	5	5	6	无
1294	1	1	1	1	4	2	2	3	2	1	4	7	1	5	7	2	2	2	4	4	4	4	4	4	4	4	4	4	3	4	4	4	4	4	4	4	4	4	4	4	4	4	4	无
1295	1	1	1	1	4	1	1	2	2	3	4	4	1	6	7	6	5	5	5	6	4	7	7	6	6	4	6	4	7	6	4	7	7	5	5	5	7	7	5	7	5	7	5	无
1296	1	1	1	1	2	4	2	2	2	2	2	6	6	2	2	2	5	5	6	6	6	6	7	2	5	2	5	2	5	2	5	2	6	2	6	2	2	5	6	2	5	6	2	专业课在哪
1297	1	1	1	1	1	2	2	1	2	1	1	6	6	6	6	6	6	6	6	6	6	6	6	6	6	6	6	6	6	6	6	6	6	6	6	6	6	6	6	6	6	6	6	无
1298	1	1	1	1	4	1	1	1	1	1	1	4	4	4	4	4	4	4	4	4	4	4	4	4	4	4	4	4	4	4	4	4	4	4	4	4	4	4	4	4	4	4	4	无
1299	1	1	1	1	4	1	1	2	2	3	1	2	2	2	2	2	3	2	3	2	1	2	3	2	1	2	2	2	3	2	1	2	1	2	2	2	2	2	2	3	1	2	1	无
1300	2	4	2	1	2	2	2	4	1	2	3	4	4	4	4	4	4	4	4	4	4	4	4	4	4	4	4	4	4	4	4	4	4	4	4	4	4	4	4	4	4	4	4	无
1301	1	1	1	1	4	1	1	2	1	3	1	5	5	5	5	5	5	5	5	5	5	5	5	4	3	5	5	4	5	3	4	5	4	4	4	4	4	4	4	4	4	3	4	无
1302	1	1	1	1	4	1	2	4	2	3	4	4	4	4	4	4	4	4	4	4	4	4	4	4	4	4	4	4	4	4	4	4	4	4	4	4	4	4	4	4	4	4	4	行
1303	1	1	1	1	4	3	3	4	2	2	3	5	5	5	5	5	5	5	5	5	5	5	5	5	5	5	5	5	5	5	5	5	4	5	4	5	4	5	4	5	4	5	4	无
1304	1	1	1	1	4	1	1	3	2	1	4	5	5	5	5	5	5	5	5	5	5	5	5	5	5	5	5	5	5	5	5	5	5	5	5	5	5	5	5	5	5	5	5	无
1305	1	3	2	1	1	2	1	3	1	1	1	4	4	4	4	4	4	4	4	4	4	4	4	4	4	4	4	4	4	4	4	4	4	4	4	4	4	4	4	4	4	4	4	无
1306	1	1	2	1	4	2	2	4	2	2	1	4	4	4	4	4	4	4	4	4	4	4	4	4	4	4	4	4	4	4	4	4	4	4	4	4	4	4	4	4	4	4	4	无
1307	1	1	1	1	2	4	4	1	1	1	3	7	7	7	7	7	7	7	7	7	7	7	7	7	7	7	7	7	7	7	7	7	7	7	7	7	7	7	7	7	7	7	7	无
1308	2	2	5	1	4	1	1	3	2	1	1	6	6	7	7	6	6	7	5	5	6	6	6	6	6	4	5	7	5	5	6	5	4	4	6	6	6	6	6	6	5	6	5	无
1309	1	1	1	1	2	3	2	3	2	1	1	5	5	5	5	5	5	5	5	5	5	5	5	5	5	5	5	5	5	5	5	5	5	5	5	5	5	5	5	5	5	5	5	无
1310	2	1	2	1	3	2	2	1	2	2	1	4	4	4	4	4	4	4	4	4	4	4	4	4	4	4	4	4	4	4	4	4	4	4	4	4	4	4	4	4	4	4	4	无
1311	1	1	2	1	2	3	3	5	2	2	1	3	3	3	3	3	3	3	3	5	5	5	5	5	5	5	5	5	6	4	6	6	4	6	7	7	7	7	6	6	7	6	6	无
1312	1	1	1	1	3	1	1	3	2	3	4	5	1	2	4	2	2	2	2	2	2	2	2	2	2	2	2	2	2	2	2	2	2	2	2	2	2	2	2	2	2	2	2	无
1313	2	1	5	1	2	3	3	3	2	2	1	2	2	2	2	2	2	2	2	2	2	2	2	2	2	2	2	2	2	2	2	2	2	2	2	2	2	2	2	2	2	2	2	无
1314	1	1	2	2	4	2	2	5	2	3	1	4	4	4	4	4	4	4	4	4	4	4	4	4	4	4	4	4	4	4	4	3	4	3	5	4	2	4	5	3	3	4	4	无
1315	2	1	2	1	2	2	2	2	2	2	1	5	4	5	5	5	5	4	5	4	5	5	4	5	4	5	5	5	4	5	5	4	5	5	5	6	5	6	5	6	5	6	6	无
1316	2	1	2	1	3	1	2	4	2	2	1	4	4	4	4	4	4	4	4	4	4	4	4	4	4	4	4	4	4	4	4	4	4	4	4	4	4	4	4	4	4	4	4	无
1317	2	1	2	1	4	1	1	2	2	2	1	2	3	2	2	2	2	2	3	3	2	3	2	3	3	2	3	3	2	3	2	2	3	2	3	2	3	2	2	2	2	3	2	无
1318	2	1	2	1	4	1	1	2	2	3	1	7	3	6	5	2	2	4	4	7	3	6	4	6	4	3	4	6	2	4	4	4	7	5	6	5	5	4	5	4	4	5	4	无
1319	1	1	2	1	2	3	3	5	2	3	1	7	7	7	7	7	7	7	7	7	7	7	7	7	7	7	7	7	7	7	7	7	7	7	7	7	7	7	7	7	7	7	7	无
1320	1	1	2	1	4	1	1	2	1	1	1	4	4	4	4	4	4	4	4	4	4	4	4	4	4	4	4	4	4	4	4	4	4	4	4	4	4	4	4	4	4	4	4	。
1321	2	1	2	1	4	1	1	1	2	2	4	4	4	4	4	4	4	4	4	4	4	4	4	4	4	4	4	4	4	4	4	4	4	4	4	4	4	4	4	4	4	4	4	无
1322	2	1	2	1	3	1	1	2	1	2	1	2	2	3	4	2	2	3	3	2	3	2	3	3	3	3	3	3	2	3	2	2	2	3	3	3	3	4	4	3	4	4	3	无
1323	2	1	2	1	2	1	1	2	1	3	1	7	2	7	4	4	3	4	7	5	4	4	4	4	4	4	4	4	4	4	4	4	4	4	4	4	4	4	4	4	4	4	4	无
1324	1	3	5	1	4	1	1	5	2	3	1	7	7	7	7	7	7	7	7	7	7	7	7	7	7	7	7	7	7	7	7	7	7	7	7	7	7	7	7	7	7	7	7	好
1325	1	1	1	1	3	2	2	1	2	3	1	7	7	7	7	7	7	7	7	7	7	7	7	7	7	7	7	7	7	7	7	7	7	7	7	7	7	7	7	7	7	7	7	无
1326	2	1	5	2	1	4	4	1	2	1	1	7	7	7	7	7	7	7	7	7	7	7	7	7	7	7	7	7	7	7	7	7	7	7	7	7	7	7	7	7	7	7	7	好
1327	2	1	2	1	2	3	3	1	1	1	1	6	6	6	6	6	6	6	6	6	6	6	6	6	6	6	6	6	6	6	6	6	6	6	6	6	6	6	6	6	6	6	6	无
1328	1	1	1	1	4	1	1	2	2	3	1	4	1	4	7	6	7	7	4	6	6	5	5	4	2	4	4	7	5	6	3	4	4	6	7	2	1	1	4	6	6	6	7	无
1329	2	1	3	1	4	2	2	2	2	3	4	5	5	5	5	5	5	5	5	5	5	5	5	5	5	5	5	5	5	5	5	5	5	5	5	5	5	5	5	5	5	5	5	无
1330	1	1	1	1	4	1	2	4	2	2	1	4	4	4	4	4	4	4	4	4	4	4	4	4	4	4	4	4	4	4	4	4	4	4	4	4	4	4	4	4	4	4	4	.
1331	2	1	5	1	4	1	1	1	1	1	1	7	7	7	7	7	7	7	7	7	7	7	7	7	7	7	7	7	7	7	7	7	7	7	7	7	7	7	7	7	7	7	7	没有
1332	2	1	2	1	4	2	1	2	1	1	4	4	3	3	4	3	3	3	4	4	3	3	5	3	3	3	4	5	3	4	5	4	4	5	3	3	4	3	5	5	3	4	3	想了解该专业还有其余什么职业
1333	1	1	1	1	4	2	1	1	1	1	1	7	7	7	7	7	7	7	7	7	7	7	7	7	7	7	7	7	7	7	7	7	7	7	7	7	7	7	7	7	7	7	7	无
1334	1	1	1	1	4	2	1	5	2	2	1	4	4	4	4	4	4	4	4	4	4	4	4	4	4	4	4	4	4	4	4	4	4	4	4	4	4	4	4	4	4	4	4	无
1335	1	3	1	2	2	1	1	1	1	1	1	7	7	7	7	7	7	7	7	7	7	7	7	7	7	7	7	7	7	7	7	7	7	7	7	7	7	7	7	7	7	7	7	无
1336	2	1	3	1	4	1	1	3	2	2	1	4	3	3	4	3	3	4	3	4	4	4	4	4	4	4	4	4	4	4	4	4	4	4	4	4	4	4	4	4	4	4	4	无
1337	1	1	1	1	4	1	1	2	2	2	3	4	3	6	3	2	2	2	2	2	2	1	2	2	2	2	2	2	1	2	2	2	2	2	1	2	2	2	2	2	2	1	2	多一些实际的少一些假大空的
1338	1	3	1	1	4	1	1	3	2	2	1	7	7	7	7	7	7	7	7	7	7	7	7	7	7	7	7	7	7	7	7	7	7	7	7	7	7	7	7	7	7	7	7	很好了
1339	2	4	2	2	2	2	2	4	2	1	1	7	7	7	7	7	7	7	7	7	7	7	7	7	7	7	7	7	7	7	7	7	7	7	7	7	7	7	7	7	7	7	7	无
1340	1	1	2	1	1	1	1	1	1	1	1	7	7	7	7	7	7	7	7	7	7	7	7	7	7	7	7	7	7	7	7	7	7	7	7	7	7	7	7	7	7	7	7	好
1341	1	1	1	1	4	4	4	5	2	3	4	5	5	5	5	5	5	5	5	5	5	5	5	5	5	5	5	5	5	5	5	5	5	5	5	5	5	5	5	5	5	5	5	1
1342	1	3	1	1	3	2	2	3	2	2	1	1	1	1	1	5	4	4	4	4	4	4	4	4	4	4	4	4	4	4	4	4	4	4	4	4	4	4	4	4	4	4	4	无
1344	1	1	1	1	4	1	1	1	1	1	1	6	6	6	6	6	6	6	6	6	6	6	6	6	6	6	6	6	6	6	6	6	6	6	6	6	6	6	6	6	6	6	6	无
1345	1	3	1	1	4	2	1	5	2	1	4	1	1	1	1	1	1	1	1	1	1	1	1	1	1	1	1	1	1	1	1	1	1	1	1	1	1	1	1	1	1	1	1	无
1346	2	1	5	1	4	3	2	5	2	1	4	5	5	5	5	5	5	5	5	5	5	5	5	5	5	5	5	5	5	5	5	5	5	5	5	5	5	5	5	5	5	5	5	。
1347	2	2	3	1	2	1	1	2	1	3	1	5	5	4	4	3	1	2	2	2	1	1	3	4	3	4	2	3	3	5	2	2	4	2	3	1	1	1	4	3	3	3	3	切实际一点，感觉到最后还是要考研考公，职业教育也是，那这样的意义又有什么呢，现在不仅仅只有我很气馁
1348	2	2	3	1	4	2	2	2	2	3	3	4	4	4	4	4	4	4	4	4	4	4	4	4	4	4	4	4	4	4	4	4	4	4	4	4	4	4	4	4	4	4	4	无
1349	2	2	3	1	2	1	1	3	1	1	1	7	5	7	7	5	5	5	5	5	5	5	5	5	5	5	5	7	7	7	7	7	7	7	7	7	7	7	7	7	7	7	7	继续努力
1350	2	2	3	1	2	2	2	2	1	1	1	7	7	7	7	7	6	6	7	7	6	7	7	6	6	7	7	6	7	7	7	7	7	7	7	7	7	7	7	7	7	7	7	2. 教学方式：部分理论课程仍以课堂讲授为主，互动性、实践性不足；针对不同就业方向（如机关党务、国企党建、高校党建、基层社区党建）的差异化教学不足，难以满足个性化职业规划需求。 3. 实践环节：实践岗位类型单一，多集中于传统基层党建，缺乏机关、国企、两新组织等多元场景的实践机会；实践指导的专业性不足，部分实习缺乏系统的带教与考核，难以实现能力的精准提升。
1351	1	1	2	1	4	1	1	5	2	3	1	5	5	5	5	5	5	5	5	5	5	5	5	5	5	5	5	5	5	5	5	5	5	5	5	5	5	5	5	5	5	5	5	无
1352	2	4	2	1	4	1	1	3	2	1	2	5	4	5	6	5	4	5	6	5	4	5	6	5	4	5	6	5	5	4	6	5	4	5	6	5	4	5	6	5	4	5	6	无
1353	1	3	1	1	4	1	1	1	2	2	1	3	3	3	5	5	5	5	5	5	5	5	5	6	6	6	6	6	6	6	6	6	6	6	6	6	6	6	6	6	6	6	6	无
1354	1	3	1	1	1	1	1	3	2	1	1	1	1	1	1	1	1	1	1	1	1	1	1	1	1	1	1	1	1	1	1	1	1	1	1	1	1	1	1	1	1	1	1	无
1355	1	2	3	1	4	2	1	5	2	3	4	1	1	1	1	1	1	1	1	1	1	1	1	1	1	1	1	7	7	2	7	1	7	7	7	1	1	1	7	2	2	2	2	无
1356	2	2	3	1	1	3	2	1	1	1	3	7	7	7	6	7	7	7	7	7	7	7	7	7	7	7	7	7	7	7	7	7	6	7	6	7	6	7	6	7	7	6	6	大学生普遍对未来职业很迷茫希望学校，不只盯着高质量就业的定位而是帮学生拓展自己的兴趣爱好以及自己未发现的领域探索
1357	2	2	3	1	4	1	1	5	2	3	1	3	2	3	2	4	2	3	2	3	3	3	3	2	2	4	3	4	4	3	3	4	4	3	4	3	3	3	3	3	4	3	4	无
1358	2	2	3	1	2	2	2	2	2	3	4	4	4	4	4	4	4	4	4	4	4	4	4	4	4	4	4	4	4	4	4	4	4	4	4	4	4	4	4	4	4	4	4	无
1359	2	2	3	1	4	1	1	4	2	3	1	5	5	5	5	5	5	5	5	4	5	5	5	4	4	4	4	5	5	5	5	3	3	3	3	5	5	5	5	5	5	5	5	无
1360	1	3	1	1	2	3	1	2	2	1	1	7	7	7	7	7	7	7	7	7	7	7	7	7	7	7	7	7	7	7	7	7	7	7	7	7	7	7	7	7	7	7	7	无
1361	2	2	3	1	4	3	1	2	1	1	4	6	6	6	6	4	4	4	4	4	4	4	4	5	5	3	5	4	3	5	5	5	6	5	6	5	5	5	5	5	5	5	5	一对一教学
1362	1	3	1	1	4	2	2	2	2	3	4	3	2	2	4	2	2	2	2	2	2	2	2	2	2	2	2	2	2	2	2	2	2	2	2	2	1	2	2	2	2	2	2	无
1363	2	2	3	1	1	2	1	2	1	2	3	5	5	5	5	4	4	4	4	4	4	4	4	4	4	4	4	4	4	4	4	4	4	4	4	4	4	4	4	4	4	4	4	🈚️
1364	1	3	1	1	3	1	1	4	1	2	1	4	2	3	3	2	2	4	2	4	4	4	4	3	1	1	1	6	3	3	1	2	1	2	2	3	3	3	3	3	3	3	3	无
1365	2	3	2	1	2	1	1	5	2	3	1	5	4	4	4	4	4	4	4	4	4	4	4	4	4	4	4	4	4	4	4	4	4	4	4	4	4	4	4	4	4	4	4	挺好的
1366	2	2	2	1	4	1	2	5	2	1	2	4	4	4	4	4	6	4	6	4	5	3	3	5	4	4	4	7	5	4	3	1	5	1	6	4	4	4	4	5	4	4	3	无
1367	2	1	3	1	2	3	1	4	2	2	4	7	7	7	7	7	7	7	7	7	7	7	7	7	7	7	7	7	7	7	7	7	7	7	7	7	7	7	7	7	7	7	7	无
1368	2	1	5	1	4	3	3	2	2	2	1	3	4	6	6	6	6	6	6	5	5	5	4	3	5	4	5	3	5	3	2	2	5	2	5	2	2	2	2	3	3	3	3	无用课程多 不如直接边学习边去实习获得经验
1369	1	3	1	1	4	1	2	1	1	1	4	3	2	3	3	2	3	2	3	2	2	3	2	2	2	2	2	3	3	3	2	1	4	3	2	1	1	1	1	3	2	2	2	多多给点实践机会
1370	1	3	1	1	2	1	1	2	1	1	1	7	7	7	6	7	7	7	7	7	7	7	7	7	7	6	7	6	6	6	6	6	6	6	6	6	6	6	6	6	6	6	6	无
1371	1	1	1	1	4	1	1	1	1	1	1	1	1	1	1	1	1	1	1	1	1	1	1	1	1	1	1	1	1	1	1	1	1	1	1	1	1	1	1	1	1	1	1	无
1372	2	2	3	1	4	2	1	1	2	2	2	5	5	4	4	4	4	4	4	4	4	4	4	4	4	4	4	4	4	4	4	4	4	4	4	4	4	4	4	4	4	4	4	增加实践学习
1373	2	2	1	1	2	3	2	3	2	2	1	6	6	6	6	6	6	6	6	6	6	6	6	6	6	6	6	6	6	6	6	6	6	6	6	6	6	6	6	6	6	6	6	无
1374	1	2	2	1	2	3	2	1	1	1	3	6	6	6	6	6	6	6	6	6	6	6	6	6	6	6	6	6	6	6	6	6	6	6	6	6	6	6	6	6	6	6	6	无
1375	2	2	3	1	4	1	1	2	2	2	1	6	6	6	6	6	6	6	6	6	6	6	6	6	6	6	6	5	5	5	5	5	5	5	5	5	5	5	5	5	5	5	5	无
1376	2	2	3	2	1	2	2	2	2	2	4	5	5	5	5	5	5	5	5	5	5	5	5	5	5	5	5	5	5	5	5	5	5	5	5	5	5	5	5	5	5	5	5	无
1377	2	2	3	2	2	3	2	3	2	1	4	7	7	7	7	7	7	7	7	7	7	7	7	7	7	7	7	7	7	7	7	7	7	7	7	7	7	7	7	7	7	7	7	无
1378	2	2	3	2	2	2	1	3	1	2	1	4	4	4	4	4	4	4	4	4	4	4	4	4	4	4	4	4	4	4	4	4	4	4	4	4	4	4	4	4	4	4	4	无
1379	1	2	3	2	4	1	1	4	1	2	1	4	4	4	4	4	4	4	4	4	4	4	4	4	4	4	4	4	4	4	4	4	4	4	4	4	4	4	4	4	4	4	4	无
1380	2	1	5	2	4	3	3	1	1	2	1	2	2	3	4	3	2	4	3	3	4	3	4	3	3	4	3	3	4	3	3	2	3	2	3	5	4	4	4	3	4	3	4	多点实践
1381	1	1	3	2	4	1	1	4	1	1	4	4	4	4	4	4	4	4	4	4	4	4	4	4	4	4	4	4	4	4	4	4	4	4	4	4	4	4	4	4	4	4	4	无
1382	2	1	3	2	2	2	2	1	1	1	4	4	4	4	4	4	4	4	4	4	4	4	4	4	4	4	4	4	4	4	4	4	4	4	4	4	4	4	4	4	4	4	4	还可以吧
1383	1	2	3	2	4	2	3	5	1	1	1	7	7	7	7	7	7	7	7	7	7	7	7	7	7	7	7	7	7	7	7	7	7	7	7	7	7	7	7	7	7	7	7	无
1384	2	1	5	2	2	2	1	3	1	3	1	4	5	4	6	5	5	5	5	5	5	5	5	5	5	5	5	6	6	6	6	6	6	6	6	6	6	6	6	6	6	6	6	无
1385	2	1	3	2	3	3	3	1	1	1	4	3	3	4	6	6	6	6	6	5	5	5	5	4	4	4	4	4	4	4	4	3	3	3	3	3	3	3	3	3	3	3	3	无
1386	2	2	3	2	1	4	3	3	2	1	1	4	2	5	5	3	5	3	4	4	6	2	4	5	4	6	4	5	6	5	3	3	7	4	4	7	7	7	7	7	5	5	3	无
1387	1	2	3	2	4	1	1	4	1	2	1	4	4	5	4	4	4	4	4	4	4	4	4	4	4	4	4	4	4	4	4	4	4	4	4	4	4	4	4	4	4	4	4	无
1388	2	2	3	2	4	2	2	1	1	1	1	2	4	3	4	3	3	5	3	4	3	3	5	3	3	5	4	3	4	3	4	3	5	3	4	4	4	3	4	3	4	3	4	无
1389	2	2	5	2	4	2	2	3	2	1	1	7	7	7	7	7	7	7	7	7	7	7	7	7	7	7	7	7	7	7	7	7	7	7	7	7	7	7	7	7	7	7	7	无
1390	2	2	3	2	2	2	1	4	2	1	2	4	4	4	4	3	4	5	4	3	4	4	3	4	4	4	4	4	3	4	3	2	3	2	5	3	2	2	3	3	4	4	4	无
1391	1	2	3	2	2	3	3	1	1	1	2	4	4	4	4	4	4	4	4	4	4	4	4	4	4	4	4	4	4	4	4	4	4	4	4	4	4	4	4	4	4	4	4	无
1392	2	2	3	2	2	1	3	3	2	1	2	6	6	6	6	6	6	6	6	6	6	6	6	6	6	6	6	6	6	6	6	6	6	6	6	6	6	6	6	6	6	6	6	无
1393	1	2	3	2	4	1	1	4	2	2	4	3	3	3	5	1	1	4	3	2	2	2	4	7	7	5	2	4	4	3	3	3	3	3	2	2	2	3	6	1	1	1	1	呃，没有
1394	2	1	3	2	1	3	3	5	2	3	1	7	1	7	7	7	7	7	7	7	7	7	7	7	7	7	7	7	7	7	7	7	7	7	7	7	7	7	7	7	7	7	7	无
1395	2	2	3	2	2	3	2	2	2	3	4	1	1	1	1	1	1	1	1	1	1	1	1	1	1	1	1	1	1	1	1	1	1	1	1	1	1	1	1	1	1	1	1	，
1396	2	2	3	2	2	2	2	2	2	2	1	4	4	4	4	4	4	4	4	4	4	4	4	4	4	4	4	4	4	4	4	4	4	4	4	4	4	4	4	4	4	4	4	无
1397	2	4	2	2	4	2	2	3	2	1	3	4	4	4	4	4	3	4	4	4	3	4	4	4	4	4	4	4	4	4	4	4	4	4	4	4	4	4	4	4	4	4	4	无
1398	1	2	3	2	1	1	1	4	2	3	4	4	4	3	4	5	4	4	4	3	4	5	4	4	3	5	4	4	4	5	4	4	5	4	4	4	5	4	4	4	4	5	4	无
1399	2	2	3	2	4	1	1	3	1	2	1	4	4	4	4	4	5	3	5	4	3	4	5	5	4	3	4	5	4	3	5	4	3	4	5	4	3	4	5	4	3	4	5	无
1400	2	2	3	2	2	2	2	1	1	1	4	4	4	4	4	4	4	4	4	4	4	4	4	4	4	4	4	4	4	4	4	4	4	4	4	4	4	4	4	4	4	4	4	无
1401	2	2	3	2	1	2	2	3	1	1	2	5	6	5	6	5	6	6	6	5	5	5	6	5	5	6	6	5	6	5	6	6	5	6	5	6	6	6	6	5	6	5	5	无
1402	1	2	3	2	4	1	1	5	2	3	4	6	1	3	3	2	2	2	2	2	2	2	2	2	2	2	3	4	3	4	4	4	5	3	3	1	1	1	1	3	3	2	3	无
1403	1	2	3	2	2	2	1	5	2	3	4	1	1	1	1	1	1	1	1	1	1	1	1	1	1	1	1	1	1	1	1	1	1	1	1	1	1	1	1	1	1	1	1	没有
1404	2	4	3	2	2	3	3	3	1	2	3	4	4	4	4	4	4	4	4	4	4	4	4	4	4	4	4	4	4	4	4	4	4	4	4	4	4	4	4	4	4	4	4	无
1405	1	2	3	2	4	2	1	1	1	2	2	5	3	5	6	4	5	6	6	7	6	6	5	3	5	5	7	6	7	6	4	3	7	7	7	5	5	4	5	4	4	4	5	无
1406	1	1	3	2	4	1	1	2	2	3	4	5	4	3	5	2	1	3	4	4	4	4	2	4	4	4	4	6	4	4	4	2	4	3	5	1	1	1	5	4	4	4	4	无
1407	2	2	3	2	4	1	1	1	2	2	4	4	4	4	4	4	4	4	4	4	4	4	4	4	4	4	4	4	4	4	4	4	4	4	4	4	4	4	4	4	4	4	4	无
1408	2	2	3	2	4	1	1	4	2	3	1	4	4	3	5	4	4	4	4	4	4	4	4	4	4	4	4	4	4	4	4	4	4	4	4	4	4	4	4	4	4	4	4	无
1409	2	2	2	2	2	2	3	1	1	2	4	6	4	4	3	7	7	7	5	6	7	4	5	4	4	3	6	7	7	7	4	3	6	5	3	6	6	6	7	7	7	7	7	没有
1410	2	2	3	2	4	1	1	4	2	3	4	3	3	3	3	3	3	3	3	3	3	3	3	3	3	3	3	3	3	3	3	3	3	3	3	3	3	3	3	3	3	3	3	无
1411	1	2	3	2	3	3	1	4	1	1	2	7	1	6	7	7	1	7	7	7	7	7	2	7	7	7	7	6	7	7	7	6	7	7	7	6	5	4	7	5	4	6	7	无
1412	1	3	1	1	4	2	2	5	2	2	1	4	6	6	7	4	4	7	4	4	4	4	4	7	4	4	4	7	4	7	4	4	4	4	4	4	4	4	4	4	4	4	4	无
1413	1	1	5	2	2	2	3	1	1	1	4	4	4	4	4	4	4	4	4	4	4	4	4	4	4	4	4	4	4	4	4	4	4	4	4	4	4	4	4	4	4	4	4	无
1414	2	2	3	2	4	1	1	2	2	3	1	7	7	7	7	7	7	7	7	7	7	7	7	7	7	7	7	7	7	7	7	7	7	7	7	7	7	7	7	7	7	7	7	无
1415	2	2	3	2	2	1	2	3	1	1	1	6	6	6	6	6	6	6	6	6	6	6	6	5	5	5	5	5	5	5	5	5	5	5	5	5	5	4	5	5	5	5	5	无
1416	2	2	3	2	2	3	3	1	1	1	2	4	4	4	4	4	4	4	4	4	4	4	4	4	4	4	4	4	4	4	4	4	4	4	4	4	4	4	4	4	4	4	4	无
1417	2	2	3	2	2	2	2	4	2	3	1	4	4	4	4	4	4	4	4	4	4	4	4	4	4	4	4	4	4	4	4	4	4	4	4	4	4	4	4	4	4	4	4	无
1418	2	2	3	2	2	3	3	3	2	2	4	5	5	5	5	5	5	5	5	5	5	5	5	5	5	5	5	5	5	5	5	5	5	5	5	5	5	5	5	5	5	5	5	。
1419	2	2	2	2	1	2	1	2	2	1	1	4	4	4	4	4	4	4	4	4	4	4	4	4	4	4	4	7	7	7	7	4	4	4	4	4	4	4	4	4	4	4	4	无
1420	2	2	5	2	2	1	1	3	2	2	1	5	5	5	5	5	5	5	5	5	5	5	5	5	5	5	5	5	5	5	5	5	5	5	5	5	5	5	5	5	5	5	5	无
1421	2	4	3	2	2	2	1	4	1	1	2	1	1	1	1	4	4	1	3	4	4	4	6	3	3	3	1	1	2	1	2	4	4	4	2	1	1	1	1	1	1	1	1	无
1422	2	1	3	2	2	2	2	1	1	1	1	7	7	7	7	7	7	7	7	7	7	7	7	7	7	7	7	7	7	7	7	7	7	7	7	7	7	7	7	7	7	7	7	无
1423	1	2	3	2	2	1	1	3	2	1	1	7	7	7	7	7	7	7	7	7	7	7	7	7	7	7	7	7	7	7	7	7	7	7	7	7	7	7	7	7	7	7	7	无
1424	1	2	3	2	4	1	1	5	2	3	4	5	3	4	5	4	5	4	4	5	5	4	4	6	5	4	5	5	5	7	4	1	4	5	3	4	2	5	3	4	5	3	4	无
1425	1	1	5	2	4	2	1	2	2	1	2	7	7	7	7	7	7	7	7	5	6	6	5	5	5	5	5	6	6	5	5	5	6	5	5	5	5	5	5	6	6	5	5	无
1426	2	2	3	2	4	2	1	2	2	2	1	5	4	5	5	5	5	5	5	5	5	5	5	5	5	5	5	5	5	5	5	5	5	5	5	5	5	5	5	5	5	5	5	无
1427	2	2	3	2	4	1	1	1	1	1	1	3	4	4	4	4	4	4	4	4	4	4	4	4	4	4	4	4	4	4	4	4	4	4	4	4	4	4	4	4	4	4	4	无
1428	2	1	3	2	3	2	2	4	2	3	4	4	4	4	4	4	4	4	4	4	4	4	4	4	4	4	4	4	4	4	4	4	4	4	4	4	4	4	4	4	4	4	4	无
1429	2	1	3	2	4	1	1	3	2	1	2	4	4	4	4	4	4	4	4	4	4	4	4	4	4	4	4	4	3	4	4	3	3	3	3	4	4	4	4	4	4	4	4	无
1430	2	1	3	2	4	1	1	5	2	1	4	7	7	7	7	7	7	7	7	7	7	7	7	7	7	7	7	7	7	7	7	7	7	7	7	7	7	7	7	7	7	7	7	无
1431	1	1	3	2	2	3	2	2	2	2	4	5	5	5	5	4	5	4	5	5	4	5	4	4	5	4	5	4	5	4	4	4	5	4	4	3	5	4	4	5	4	4	4	没有
1432	1	1	3	2	4	1	1	3	2	1	4	7	7	7	7	7	7	7	7	7	7	7	7	7	7	7	7	7	7	7	7	7	7	7	7	7	7	7	7	7	7	7	7	无
1433	2	2	5	2	4	1	1	3	2	1	4	4	3	4	5	4	4	4	5	7	5	4	6	4	5	5	4	5	4	4	5	5	4	4	4	5	5	5	5	7	6	5	4	无
1434	1	1	3	2	2	1	1	1	1	2	4	4	2	5	6	6	4	6	5	5	6	6	4	6	6	5	6	7	4	7	3	3	6	7	7	5	6	5	5	6	6	5	5	无
1435	2	1	3	2	3	2	1	2	2	3	4	4	4	4	4	4	4	4	4	4	4	4	4	4	4	4	4	4	4	4	4	4	4	4	4	4	4	4	4	4	4	4	4	无
1436	2	1	3	2	4	1	1	1	2	1	4	6	4	6	6	5	5	7	7	5	6	6	7	7	7	7	7	7	6	7	5	4	4	6	6	7	7	7	7	6	6	6	6	无
1437	1	1	3	2	2	2	2	3	1	3	4	4	4	4	4	4	4	4	4	4	4	4	4	4	4	4	4	4	4	4	4	4	4	4	4	4	4	4	4	4	4	4	4	无
1438	1	1	3	2	1	3	3	4	2	2	4	4	4	4	4	1	1	1	1	1	1	1	1	1	1	1	1	4	4	4	4	4	4	4	4	4	4	4	4	4	3	4	4	无
1439	2	1	5	2	2	2	1	2	1	1	4	3	3	4	5	4	4	4	4	4	4	4	4	4	4	4	4	5	3	4	3	5	4	4	4	4	5	4	4	3	5	5	4	无
1440	2	2	5	2	4	1	2	3	2	1	4	5	5	5	5	4	4	4	4	3	3	3	3	4	4	4	4	4	4	4	4	3	3	3	3	4	4	4	4	4	4	4	4	无
1441	1	4	3	2	2	2	1	3	2	2	1	5	5	5	4	4	4	4	3	4	3	4	3	4	3	4	3	4	3	4	3	4	3	4	3	4	3	4	3	4	3	4	3	你好
1442	2	1	3	2	4	1	1	3	2	1	4	6	2	3	6	5	6	6	3	4	5	5	5	6	6	6	4	4	4	4	4	3	4	5	4	4	6	5	6	5	3	4	4	介绍学习方法，以及未来的多样道路
1443	2	1	3	2	2	1	3	3	2	1	4	4	4	4	4	4	4	4	4	4	4	4	4	4	4	4	4	4	4	4	4	4	4	4	4	4	4	4	4	4	4	4	4	无。
1444	2	1	3	2	2	2	2	1	2	1	4	7	4	6	6	4	4	4	4	4	5	4	4	5	5	4	6	5	5	5	4	4	5	5	5	4	4	4	4	4	4	4	4	无
1445	2	2	5	2	3	3	3	2	2	1	4	5	4	4	4	5	6	6	5	4	5	4	4	5	4	4	4	6	4	4	4	4	6	4	5	5	4	4	5	5	5	5	4	希望能多开一些实用技能课、增加高质量实习，让我们更好地对接职场需求。
1446	1	1	3	2	2	2	2	1	1	2	1	7	4	4	4	4	4	4	4	4	4	4	4	4	4	4	4	4	4	4	4	4	4	4	4	4	4	4	4	4	4	4	4	没有
1447	2	1	3	2	4	2	1	2	2	3	1	7	6	4	7	2	2	2	2	1	1	1	1	7	7	7	7	7	4	1	4	4	7	7	7	7	7	7	7	6	4	7	3	无
1448	2	2	3	2	4	2	1	4	2	2	1	4	3	4	4	4	4	4	4	4	4	4	4	4	4	4	4	4	4	4	4	4	4	4	4	4	4	4	4	4	4	4	4	对我在党务方面会有较大帮助
1449	1	1	1	1	1	4	4	1	1	2	1	5	5	5	5	5	5	5	5	5	5	5	5	5	5	5	5	5	5	5	5	5	5	5	5	5	5	5	5	5	5	5	5	6
1450	1	4	3	2	4	1	1	2	1	1	1	7	7	7	7	7	7	7	7	7	7	7	7	7	7	7	7	5	5	5	5	7	7	7	7	6	7	7	7	7	7	7	7	无
1451	2	2	5	2	1	4	4	5	2	2	4	3	4	2	2	3	3	4	4	4	4	4	4	3	3	4	3	4	3	4	3	4	4	4	4	4	3	3	4	3	4	3	4	无
1452	2	4	3	2	2	3	2	1	2	1	1	7	7	7	7	7	7	7	7	7	7	7	7	6	6	7	6	7	6	7	6	6	6	6	6	6	6	6	6	6	6	6	6	无
1453	1	1	3	2	2	4	3	3	1	1	1	4	3	3	3	5	5	5	5	5	5	5	5	5	5	5	5	6	4	5	5	3	5	5	5	7	7	7	7	5	4	5	4	帮助我理解专业，无不足
1454	1	4	3	2	4	1	1	1	1	2	4	5	4	4	5	7	7	7	7	7	7	7	7	7	7	7	7	7	7	7	7	7	7	7	7	7	7	7	7	7	7	7	7	更贴近一下当代社会的发展与就业需求导向。
1455	2	2	3	2	2	1	1	4	2	2	4	1	2	2	2	2	6	5	2	2	5	2	2	2	6	2	2	2	6	6	2	2	6	2	6	2	5	4	4	4	4	4	4	无
1456	2	4	3	2	2	1	1	1	2	1	3	4	4	4	4	4	4	3	3	3	4	4	4	4	4	3	4	4	4	4	4	4	4	4	4	4	4	4	4	4	4	4	4	无
1457	2	4	3	2	2	3	1	1	1	2	1	7	7	7	7	7	7	7	7	7	7	7	7	7	7	7	7	7	7	7	7	7	7	7	7	7	7	7	7	7	7	7	7	没有
1458	2	1	3	2	4	1	1	3	2	1	4	3	2	2	4	4	2	4	3	3	4	3	3	4	3	3	4	7	3	6	4	2	2	3	3	6	6	6	7	4	4	4	4	无
1459	2	4	3	2	4	1	1	2	2	2	1	4	4	4	4	4	4	3	5	4	4	4	4	4	4	5	4	4	4	4	4	5	5	5	5	4	5	4	4	6	5	5	4	无
1460	2	1	5	2	4	1	1	4	2	2	4	3	3	3	3	3	3	3	3	3	3	3	3	3	3	3	3	4	4	4	4	3	4	4	4	4	4	4	4	4	4	4	4	帮我了解我的专业
1461	2	1	3	2	4	1	1	2	1	1	4	7	7	7	7	5	5	7	4	5	7	5	6	6	5	5	5	6	5	6	4	4	7	5	7	7	7	7	7	5	5	6	6	无
1462	2	1	3	2	3	2	2	1	2	2	3	4	4	4	4	5	5	5	5	4	4	4	4	6	6	6	6	5	5	5	5	3	4	4	4	3	4	4	4	5	5	5	5	无
1463	2	1	3	2	4	3	3	2	2	1	2	7	3	5	7	1	1	5	2	6	7	5	1	4	6	5	7	6	5	3	1	1	5	5	5	6	4	4	7	6	5	5	5	无
1464	2	1	3	2	2	1	1	5	2	2	4	4	4	4	4	4	4	4	4	4	4	4	4	4	4	4	4	4	4	4	4	4	4	4	4	4	4	4	4	4	4	4	4	无
1465	1	1	5	2	2	2	2	3	2	1	1	6	6	6	6	6	6	6	6	6	6	6	6	6	6	6	6	6	6	6	6	6	6	6	6	6	6	6	6	6	6	6	6	资源把握不住
1466	1	3	1	1	4	1	1	2	2	1	4	6	1	6	6	6	6	6	6	6	6	6	6	6	5	5	6	6	7	6	1	6	2	2	2	4	4	4	4	4	4	4	4	无
1467	2	1	5	2	4	1	3	4	2	1	1	2	3	3	3	2	2	2	2	3	3	3	3	2	2	2	2	3	3	3	3	2	2	3	3	3	3	2	2	3	3	3	3	无
1468	2	1	3	2	3	1	1	3	1	1	4	4	2	2	6	2	2	4	2	3	4	3	2	5	5	4	4	4	3	5	2	2	3	2	2	1	1	1	1	2	1	2	1	说点现实的
1469	2	2	3	1	2	3	3	2	1	1	3	4	4	4	4	4	4	4	4	4	4	4	4	4	4	4	4	4	4	4	4	4	4	4	4	4	4	4	4	4	4	4	4	无
1470	2	4	3	2	2	1	1	1	2	2	1	7	3	3	5	4	3	3	5	5	5	3	3	3	3	4	5	5	6	4	4	3	6	3	3	3	3	4	3	4	5	5	5	无
1471	2	1	3	2	1	3	3	2	2	1	4	7	6	6	5	7	6	6	6	5	5	5	5	5	6	6	5	5	6	5	6	6	5	6	5	6	5	5	5	6	6	7	7	无
1472	2	1	5	2	4	1	1	4	2	2	4	4	4	4	4	4	4	4	4	4	4	4	4	5	4	5	5	5	5	5	5	5	5	5	5	5	4	5	5	5	5	5	5	无
1473	1	1	3	2	4	1	1	2	1	2	1	3	3	3	3	3	3	3	3	3	3	3	3	3	3	3	3	3	3	3	3	3	3	3	3	3	3	3	3	3	3	3	3	是的
1474	1	3	5	2	4	3	3	1	2	2	2	7	7	7	7	7	7	7	7	7	7	7	7	7	7	7	7	7	7	7	7	7	7	7	7	7	7	7	7	7	7	7	7	无
1475	2	1	3	2	2	3	2	1	1	1	4	7	5	6	6	4	2	4	4	4	5	4	3	5	6	4	5	5	3	5	4	1	5	5	5	4	4	3	5	4	5	5	5	能不能多一点实践的环节，另外我觉得还需要开拓一下职业种类领域的视野，我希望能让我们真正得到帮助，而不是以水课来对待
1476	1	3	5	1	1	1	1	4	1	1	1	7	7	7	7	7	7	7	7	7	7	7	7	7	7	7	7	7	7	7	7	7	7	7	7	7	7	7	7	7	7	7	7	。
1477	2	2	3	2	4	3	2	2	2	3	4	5	3	6	4	3	3	5	2	4	2	2	5	5	4	5	3	6	2	2	1	2	3	4	2	3	3	3	6	6	6	6	6	希望实践经验大于理论，但要注重实践中理论的应用，二者取得平衡。当然，职业规划要以就业为目的，可以向同学们介绍与专业相关的各种职业。
1478	2	2	3	2	3	1	1	1	2	2	4	4	4	4	4	4	4	4	4	4	4	4	4	5	5	5	5	5	5	5	5	5	5	5	5	5	5	5	5	5	5	5	5	无
1479	1	3	1	1	4	2	1	2	2	2	1	4	4	4	4	4	4	4	4	4	4	4	4	4	4	4	4	4	4	4	4	4	4	4	4	4	4	4	4	4	4	4	4	好
1480	2	2	3	2	2	2	3	3	2	2	4	5	3	5	5	5	5	5	5	5	5	5	5	5	5	5	5	6	5	6	5	6	5	6	5	6	5	6	5	6	5	6	5	无
1481	2	1	3	2	2	2	2	2	1	2	1	7	7	7	7	7	7	7	7	7	7	7	7	7	7	7	7	7	7	7	7	7	7	7	7	7	7	7	7	5	4	6	4	无
1482	2	2	3	2	4	1	1	3	2	3	4	2	2	2	2	2	2	2	2	4	2	3	2	2	2	2	3	4	4	4	2	2	3	2	2	3	2	2	4	4	3	4	2	无
1483	1	1	3	2	4	3	1	4	2	2	4	3	3	3	3	3	3	3	3	3	3	3	3	3	3	3	3	3	3	3	3	3	3	3	3	3	3	3	3	3	3	3	3	无
1484	2	2	3	2	4	3	3	1	1	2	1	5	4	2	4	2	2	2	2	2	2	2	2	5	5	4	4	7	3	4	5	4	5	5	5	3	3	3	7	5	4	7	3	暂无
1485	2	1	5	2	4	1	1	1	1	2	1	7	4	5	5	3	2	2	4	3	5	3	4	7	6	4	6	5	5	5	4	3	4	5	6	4	4	4	4	5	5	5	3	无
1486	1	1	3	2	4	2	2	5	2	2	4	4	4	4	4	4	4	4	4	4	4	3	4	4	3	4	4	6	3	5	4	4	3	4	4	4	4	4	4	4	3	4	4	无
1487	2	4	3	2	4	1	1	1	2	3	1	6	6	6	5	5	5	5	5	5	6	6	5	5	5	5	5	5	5	5	5	5	6	5	5	5	6	5	4	5	5	4	5	无
1488	2	1	3	2	2	3	2	1	1	2	4	4	4	4	6	4	4	4	7	7	7	4	2	5	4	4	7	5	4	4	6	4	4	4	5	5	5	2	7	4	4	7	7	很好
1489	2	1	3	2	2	2	2	4	2	1	4	4	2	2	5	2	2	2	4	3	5	4	3	5	5	4	4	5	3	6	3	2	4	4	4	4	4	7	7	7	7	7	4	无
1490	2	2	3	2	4	1	1	3	2	2	1	5	5	5	7	5	5	6	5	5	6	6	7	7	7	7	7	7	7	7	7	6	7	7	7	7	7	7	7	7	7	7	7	无
1491	2	2	2	2	3	3	2	3	2	1	1	7	7	7	7	7	7	7	7	7	7	7	7	7	7	7	7	7	7	7	7	7	7	7	7	7	7	7	7	7	7	7	7	无
1492	1	4	3	2	2	3	1	5	2	2	2	4	4	4	4	4	4	4	4	4	4	4	4	4	4	4	4	4	4	4	4	4	4	4	4	4	4	4	4	4	4	4	4	无
1493	2	1	3	2	4	1	1	2	2	2	2	7	3	3	4	3	3	3	3	4	4	4	4	4	4	4	4	5	4	4	4	4	4	4	3	3	3	3	5	5	5	5	5	无
1494	2	1	3	2	2	3	3	2	1	1	4	4	4	5	5	5	5	5	5	5	5	5	5	5	4	4	4	5	4	5	4	5	5	5	5	5	5	5	5	5	5	5	5	无
1495	2	1	2	2	2	1	1	3	2	3	4	4	1	1	4	4	2	2	7	3	4	5	5	3	3	4	4	5	5	5	4	4	5	4	3	5	3	4	6	3	3	6	2	无
1496	2	4	3	2	2	1	1	1	1	2	1	3	3	3	7	5	3	7	5	5	5	5	5	5	5	5	5	5	5	5	5	5	5	5	5	5	5	5	5	5	5	5	5	无
1497	1	3	2	1	4	1	3	2	2	2	1	5	5	5	5	4	4	4	4	4	4	4	4	4	4	4	4	4	4	4	4	4	4	4	4	4	4	4	4	4	4	4	4	无
1498	2	2	5	2	4	1	1	2	1	2	4	5	5	6	5	4	4	4	4	4	4	4	4	4	4	4	4	5	4	5	4	3	5	5	5	4	5	5	5	5	4	5	5	无
1499	1	3	2	1	4	1	1	5	2	1	1	7	7	7	7	7	7	7	7	7	7	7	7	7	7	7	7	7	7	7	5	5	6	5	6	5	6	5	6	5	6	5	6	无
1500	2	2	3	2	4	1	1	1	1	1	1	3	3	3	3	3	3	3	3	3	3	3	3	4	5	4	3	3	4	4	3	4	3	5	4	5	4	6	6	5	4	5	3	无
1501	2	1	5	2	3	1	1	2	1	2	1	7	5	5	7	5	4	5	5	5	5	5	5	7	6	7	6	7	6	5	5	3	4	5	6	5	5	6	7	6	6	7	5	无
1502	2	2	3	2	3	1	2	3	1	2	3	5	5	5	5	5	5	5	5	5	5	5	5	5	5	5	5	5	5	5	5	5	5	5	5	5	5	5	5	5	5	5	5	无
1503	2	2	3	2	4	2	2	3	2	1	1	6	6	6	6	5	5	5	5	6	6	6	6	6	6	5	5	5	5	5	5	5	5	5	5	5	5	5	5	5	5	5	5	无
1504	2	2	3	2	4	1	1	3	2	1	1	5	4	4	3	2	2	3	3	3	3	3	3	3	3	3	3	3	3	3	3	3	3	3	3	3	3	3	3	3	3	3	3	无
1505	2	2	3	2	3	2	1	2	1	2	4	5	6	6	5	6	5	6	4	6	5	6	5	5	5	4	5	6	5	6	5	5	5	6	5	5	4	5	6	5	5	5	5	无
1506	2	2	3	2	2	3	2	3	2	1	1	6	6	6	6	6	6	6	6	6	6	6	6	6	6	6	6	6	6	6	6	6	6	6	6	6	6	6	6	6	6	6	6	无
1507	2	4	3	2	2	3	3	1	2	1	3	5	5	5	5	5	5	5	5	5	5	5	5	5	5	5	5	5	5	5	5	5	5	5	5	5	5	5	5	5	5	5	5	无
1508	1	2	3	2	4	1	1	5	1	1	3	7	7	7	7	7	7	7	7	7	7	7	7	7	7	7	7	7	7	7	7	7	7	7	7	7	7	7	7	7	7	7	7	无
1509	2	2	5	2	3	1	1	2	1	2	1	4	4	4	4	4	4	4	4	4	4	4	4	4	4	4	4	3	3	3	3	3	3	3	3	3	3	3	3	3	3	3	3	目前没有什么好建议
1510	2	2	3	2	3	1	1	1	2	2	2	4	4	4	4	4	4	4	4	4	4	4	4	4	4	4	4	4	4	4	4	4	4	4	4	4	4	4	4	4	4	4	4	无
1511	1	3	2	1	4	1	3	2	2	2	1	4	4	4	4	4	4	4	4	4	4	4	4	4	4	4	4	4	4	4	4	4	4	4	4	4	4	4	4	4	4	4	4	无
1512	2	2	3	2	2	2	2	2	2	2	4	5	5	5	5	5	5	5	5	5	5	5	5	5	5	5	5	5	5	5	5	5	5	5	5	5	5	5	5	5	5	5	5	无
1513	2	2	5	2	4	1	1	5	2	2	1	7	7	7	7	7	7	7	7	7	7	7	7	7	7	7	7	7	7	7	7	7	7	7	7	7	5	6	5	5	5	5	5	无
1514	2	2	3	2	4	1	1	2	2	2	1	5	5	4	4	6	6	6	6	6	6	6	6	6	6	6	6	6	6	6	6	6	6	6	6	6	6	6	6	6	6	6	6	无
1515	2	2	5	2	2	2	2	2	2	2	1	4	4	4	4	4	4	4	4	4	4	4	4	4	4	4	4	4	4	4	4	4	4	4	4	4	4	4	4	4	4	4	4	无
1516	2	2	3	2	4	3	2	1	1	1	3	4	4	3	2	2	2	3	2	2	2	2	2	3	3	3	3	6	6	6	6	5	4	5	5	5	5	5	5	5	5	5	5	无
1517	2	1	3	2	2	2	2	1	1	1	4	6	6	6	6	4	4	2	4	7	6	4	4	4	5	5	5	7	6	6	4	2	6	6	6	3	2	2	6	6	6	6	6	无
1518	2	2	3	2	3	2	2	3	1	1	1	6	6	6	6	6	6	6	6	6	6	6	6	6	6	6	6	6	6	6	6	6	6	6	6	6	6	6	6	6	6	6	6	无
1519	2	2	5	2	4	1	1	3	2	1	1	4	4	4	4	4	4	4	4	4	4	4	4	4	4	4	4	4	4	4	4	4	4	4	4	4	4	4	4	4	4	4	4	无
1520	2	4	3	2	4	1	1	3	1	3	2	5	5	5	5	4	5	5	4	4	5	5	4	5	4	5	4	5	5	5	4	5	4	5	5	5	5	5	5	5	6	5	6	无
1521	2	2	3	2	2	3	3	1	1	1	4	3	2	3	6	4	4	4	3	5	5	3	5	5	2	3	4	7	7	7	4	2	7	2	2	7	4	4	5	5	5	6	4	无
1522	2	3	5	1	4	1	1	1	2	1	1	7	5	7	7	6	6	7	6	6	7	6	5	5	5	5	6	7	6	6	5	2	7	7	5	5	3	3	6	7	6	7	3	开设实习体验
1523	1	3	2	1	3	3	3	4	2	3	4	4	4	4	4	5	5	5	5	5	5	5	5	4	5	4	4	5	5	4	5	5	5	5	5	5	5	5	5	5	5	5	5	无
1525	2	3	2	1	2	3	2	4	2	3	1	5	4	5	5	5	4	5	5	5	5	4	4	5	4	4	3	4	3	4	4	4	3	4	4	3	3	3	3	3	3	3	3	无
1526	1	3	2	1	4	1	1	5	2	3	4	3	1	3	5	3	3	3	3	3	3	3	3	3	3	3	3	3	3	3	3	3	3	3	3	3	3	3	3	3	3	3	3	无
1527	2	1	3	2	3	1	1	2	1	1	1	5	4	5	7	3	3	6	6	2	5	2	2	5	6	3	4	5	3	3	4	4	5	5	6	2	2	2	4	6	5	5	5	无
1528	2	3	5	2	4	2	1	3	1	1	1	6	6	6	6	6	6	6	6	6	6	6	6	6	6	6	6	6	6	6	6	6	6	6	6	6	6	6	6	6	6	6	6	无
1529	1	2	3	2	2	2	1	2	1	1	1	7	7	7	7	7	7	7	7	7	7	7	7	7	7	7	7	7	7	7	7	7	7	7	7	7	7	7	7	7	7	7	7	无
1530	2	1	3	2	2	1	2	2	2	2	3	7	7	7	7	7	7	7	7	7	7	7	7	7	7	7	7	7	7	7	7	7	7	7	7	7	7	7	7	7	7	7	7	无
1531	2	4	3	2	3	1	1	4	2	3	2	5	5	4	4	3	3	3	3	3	3	3	3	3	3	3	3	3	3	3	3	3	3	3	3	3	3	3	3	3	3	3	3	无
1532	2	3	2	1	4	1	1	5	2	3	4	7	3	6	6	6	6	6	6	6	6	6	6	6	6	6	6	6	6	6	6	6	6	6	6	6	6	6	6	6	6	6	6	无
1533	2	2	5	2	4	1	1	2	2	1	1	7	7	4	4	4	3	3	3	4	4	4	4	4	4	4	4	4	4	4	4	4	4	4	4	4	4	4	4	4	4	4	4	多些实践
1534	2	2	3	2	2	3	2	2	2	1	4	6	4	6	6	6	6	6	6	6	6	6	6	5	5	5	5	5	5	5	4	5	5	3	3	5	5	5	5	4	4	5	5	无
1535	2	3	2	1	1	2	2	3	2	3	1	3	1	1	1	1	1	1	1	1	1	1	1	4	5	4	4	4	4	4	4	4	4	4	4	4	4	4	4	4	4	4	4	u
1536	2	1	3	2	4	1	1	2	1	2	1	3	1	4	7	4	2	3	4	4	5	3	6	7	6	6	5	4	3	6	5	4	3	5	4	5	7	5	7	5	4	4	4	希望教师增强的课堂教学逻辑，并与教材相结合。多一些实践实习机会。
1537	2	2	3	2	4	1	1	4	2	3	1	7	5	3	3	2	2	2	2	4	2	2	2	2	3	2	2	5	2	4	2	2	2	2	2	4	3	3	4	2	2	4	2	无
1538	1	2	3	2	4	1	1	4	2	2	1	3	3	4	3	3	3	3	3	3	3	3	3	3	3	3	3	3	3	3	3	3	3	3	3	3	3	3	3	3	3	3	3	无
1539	2	2	3	2	2	2	3	1	1	2	3	4	5	5	6	6	6	6	5	4	4	4	6	5	4	5	5	6	4	5	6	3	4	5	5	6	6	6	6	6	4	5	5	社会实践方面机会比较少，希望学校可以多帮助学生链接校外资源，提供外出实践的机会
1540	2	4	3	1	2	1	3	1	2	2	3	4	5	5	5	5	5	5	5	5	5	5	5	5	5	5	5	5	5	5	5	5	5	5	5	5	5	5	5	5	5	5	5	五
1541	2	4	3	2	4	1	1	1	2	2	2	6	5	5	6	6	5	4	4	5	5	4	5	4	6	4	4	6	5	5	4	3	5	4	3	5	4	4	6	5	5	6	4	无
1542	2	3	2	1	4	2	1	5	1	2	4	7	7	7	7	7	7	7	7	7	7	7	7	7	7	7	7	7	7	7	7	7	7	7	7	7	7	7	7	7	7	7	7	🈚️
1543	1	1	3	2	2	2	1	2	2	1	2	4	4	4	5	3	3	3	3	3	3	3	4	4	3	3	4	5	4	4	4	4	4	4	4	5	4	5	6	4	3	5	4	无
1544	2	4	3	2	1	3	3	3	2	3	2	1	1	1	1	7	7	7	7	7	7	7	7	7	7	7	7	7	7	7	7	7	7	7	7	7	7	7	7	7	7	7	7	无
1545	1	3	1	2	2	2	1	2	2	1	1	6	6	6	6	6	6	6	6	6	6	6	6	6	6	6	6	6	6	6	6	6	6	6	6	6	6	6	6	6	6	6	6	1
1546	1	4	3	2	4	1	1	3	1	2	3	4	4	4	4	4	4	4	4	4	4	4	4	4	4	4	4	4	4	4	4	4	4	4	4	3	3	3	3	3	3	3	3	无
1547	2	2	2	1	1	2	1	5	2	3	1	7	7	7	7	7	7	7	7	7	7	7	7	7	7	7	7	7	7	7	7	7	7	7	7	7	7	7	7	7	7	7	7	无
1548	2	1	3	2	2	2	3	1	1	2	4	7	3	7	7	7	7	7	7	7	7	7	7	5	5	5	5	7	3	4	4	5	7	5	5	7	7	7	7	7	5	5	7	越来越好
1549	2	1	3	2	4	2	2	3	1	1	2	7	7	7	7	7	7	7	7	7	7	7	7	6	6	7	6	6	6	6	6	6	6	6	6	6	6	6	6	6	6	6	6	无
1550	1	4	2	1	4	3	2	3	2	2	1	4	4	4	4	4	4	4	4	4	4	4	4	4	4	4	4	4	4	4	4	4	4	4	4	4	4	4	4	4	4	4	4	有
1551	2	4	3	2	4	1	1	3	1	2	2	4	3	6	6	4	3	5	5	4	4	3	5	5	4	4	5	6	5	6	7	4	4	5	4	6	6	6	6	6	6	7	6	无
1552	2	1	2	1	4	1	1	3	2	1	1	7	7	7	7	7	7	7	7	6	7	6	6	7	6	7	6	6	7	6	7	6	7	6	7	6	7	6	7	7	6	7	6	无
1553	2	1	3	2	4	1	1	3	2	1	1	7	7	7	7	7	7	7	7	7	7	7	7	7	7	7	7	7	7	7	7	7	7	7	7	7	7	7	7	7	7	7	7	无
1554	1	4	3	2	4	1	1	2	1	1	1	4	4	4	4	5	4	4	4	5	4	4	4	5	4	5	5	5	4	5	5	5	5	4	5	5	4	5	4	5	4	5	4	加大专业与社会需求（实务操作）匹配度
1555	2	3	2	1	4	2	1	2	2	3	3	6	6	5	6	6	5	5	6	6	6	6	6	6	6	6	6	6	6	6	6	6	6	6	6	6	6	6	6	5	5	6	5	无
1556	2	2	2	1	4	1	1	2	1	2	1	3	3	3	3	4	4	4	4	3	3	3	4	4	3	3	3	3	3	3	3	6	5	5	5	6	6	6	5	6	6	6	6	无
1557	2	4	3	2	2	2	1	3	2	1	2	6	4	4	5	5	5	5	5	6	6	4	6	5	4	4	4	5	5	5	3	3	4	2	4	1	1	1	3	4	5	4	5	无
1558	2	4	3	2	2	3	3	1	1	1	3	7	7	7	7	7	7	7	7	7	7	7	7	7	7	7	7	7	7	7	7	7	7	7	7	7	7	7	7	7	7	7	7	无
1559	2	2	2	1	4	1	1	3	2	2	1	5	5	5	5	5	5	5	5	5	5	5	5	5	5	5	5	5	5	5	5	5	5	5	5	5	5	5	5	5	5	5	5	无
1560	2	2	2	1	2	3	1	4	2	2	1	3	3	5	5	5	5	5	5	3	3	3	3	3	3	3	3	4	3	3	3	4	3	3	3	3	3	3	3	3	3	3	3	无
1561	2	2	5	1	4	1	1	2	2	1	1	7	7	7	7	7	7	7	7	7	7	7	7	5	5	5	5	5	5	5	5	5	5	5	5	6	6	6	6	6	6	6	6	无
1562	2	2	3	2	1	1	2	5	2	3	1	2	2	2	2	2	2	2	2	2	2	2	2	3	3	3	3	3	3	3	3	3	3	3	4	3	3	3	3	3	3	3	3	无
1563	2	2	2	1	3	2	2	2	2	3	3	4	4	4	5	4	4	4	4	4	4	4	4	4	4	4	4	4	4	4	4	4	4	4	4	4	4	4	4	4	4	4	4	暂无
1564	2	2	3	2	3	3	2	4	2	1	3	6	5	5	5	5	5	5	5	5	5	5	5	4	4	4	5	5	4	4	4	4	5	4	4	4	4	4	4	5	5	5	4	无
1565	2	4	3	2	4	3	3	4	2	3	2	1	1	1	1	1	1	1	1	1	1	1	1	1	1	1	1	1	1	1	1	1	1	1	1	1	1	1	1	1	1	1	1	gg
1566	2	3	5	1	3	1	1	5	2	2	1	6	7	7	7	7	7	7	7	5	5	5	5	6	6	6	6	6	6	6	6	6	6	6	6	6	6	6	6	6	6	6	6	无
1567	2	4	5	2	1	3	3	3	2	1	1	5	5	5	5	5	5	5	5	5	5	5	5	5	5	5	5	5	6	6	6	6	6	6	6	6	6	6	6	6	6	6	6	无
1568	2	4	3	2	4	1	1	2	2	1	1	6	7	6	6	4	7	4	6	6	5	5	6	5	6	5	6	5	6	5	6	5	6	5	6	5	6	4	6	5	6	5	5	没有
1569	1	1	2	1	4	1	1	1	1	1	1	7	3	5	7	4	7	5	5	5	5	5	5	5	5	5	5	7	5	5	5	7	7	7	7	6	6	6	6	6	6	6	6	无
1570	2	4	3	2	2	1	1	1	1	3	1	6	6	6	6	6	6	6	6	6	6	7	7	7	7	7	7	7	5	7	7	7	7	7	7	7	7	7	7	7	7	7	7	无
1571	2	4	2	2	4	1	1	3	2	3	1	7	7	7	7	7	7	7	7	7	7	7	7	7	7	7	7	7	7	7	7	7	7	7	7	7	7	7	7	7	7	7	7	无
1572	2	4	2	2	4	1	1	4	2	3	3	4	4	4	5	4	4	5	5	4	4	5	3	5	3	5	5	5	5	2	3	3	4	3	7	4	4	4	6	4	3	4	4	无
1573	1	3	2	1	2	3	3	3	2	3	2	6	5	5	5	5	5	5	5	5	5	5	5	4	5	5	5	6	5	5	5	5	5	5	5	5	5	5	5	5	5	5	5	无
1574	1	4	2	2	4	1	1	4	2	1	4	6	5	5	5	4	5	5	5	5	5	5	5	5	6	5	5	6	5	5	5	5	5	5	6	5	5	4	4	4	5	4	5	无
1575	2	2	3	2	2	4	3	3	1	2	4	5	3	3	5	4	4	3	4	3	3	4	4	4	3	3	3	4	2	4	2	3	3	4	2	3	2	2	3	4	3	3	3	实践课程当增加
1576	2	2	3	2	4	1	1	2	1	2	1	3	3	3	4	4	4	4	4	4	4	4	4	4	4	4	4	4	4	4	4	4	4	4	4	4	4	4	4	4	4	4	4	无
1577	1	1	3	2	2	3	2	4	1	2	1	6	6	6	6	6	6	6	6	6	6	6	6	6	6	6	6	6	6	6	6	6	6	6	6	6	6	6	6	6	6	6	6	无
1578	1	1	1	2	2	4	2	4	2	1	1	6	6	6	6	6	6	6	6	6	6	6	6	6	6	6	6	6	6	6	5	6	6	6	6	6	6	6	6	6	6	6	6	无
1579	2	1	5	2	3	1	1	2	1	1	4	7	2	4	5	4	4	4	4	4	4	4	4	5	3	3	3	7	5	5	4	2	2	4	4	6	6	6	6	6	6	6	6	无
1580	2	4	5	2	4	1	1	1	1	2	1	7	7	7	7	7	7	7	7	7	7	7	7	7	7	7	7	7	7	7	7	7	7	7	7	6	6	6	6	6	5	4	6	无
1581	1	1	5	2	1	1	1	5	2	3	4	4	4	4	4	4	4	4	4	4	4	4	4	4	4	4	4	4	4	4	4	4	4	4	4	4	4	4	4	4	4	4	4	无
1582	2	2	3	2	4	1	1	1	2	2	1	1	2	2	5	6	6	6	4	4	5	4	6	6	6	6	6	6	4	5	6	1	4	2	3	7	7	7	7	7	7	7	7	希望多开展一些针对性强的就业指导
1583	2	1	3	2	4	2	3	1	1	1	1	5	5	5	5	3	4	4	4	5	5	3	4	6	6	5	4	7	6	3	5	5	6	6	6	5	5	5	4	7	6	6	6	中国共产党简史的老师课堂展示也太水了吧？？同学照着念就行就说很好，，那上去分享的意义是什么呢？？
1584	2	4	3	2	4	1	1	1	1	2	3	6	6	5	6	7	6	6	6	6	6	6	6	6	6	6	6	6	6	5	7	6	6	6	6	6	6	6	6	6	6	6	6	无
1585	2	1	3	2	2	1	1	2	2	2	1	4	1	2	4	4	4	4	4	1	2	2	2	1	1	1	1	4	1	1	1	1	4	4	4	4	4	7	7	1	1	4	1	无
1586	1	1	3	2	2	2	1	1	1	1	4	4	4	4	4	4	4	4	4	4	4	4	4	4	4	4	4	4	4	4	4	4	4	4	4	4	4	4	4	4	4	4	4	多设置题目
1587	2	1	3	2	4	2	2	3	1	1	1	5	4	5	6	4	6	4	5	4	5	6	7	4	6	4	6	6	5	6	5	7	7	7	7	7	7	7	7	6	7	7	7	我认为应该添加一些实践类的课程
1588	2	2	3	2	3	1	1	1	1	1	1	4	4	4	4	4	4	4	4	4	4	4	4	4	4	4	4	4	4	4	4	4	4	4	4	4	4	4	4	4	4	4	4	无
1589	2	4	3	2	2	2	2	3	1	1	1	6	6	6	6	4	4	4	4	5	5	5	5	5	5	5	5	5	4	4	4	4	5	4	5	4	4	6	5	5	5	5	5	无
1590	1	1	3	2	2	3	3	3	2	1	1	4	3	4	5	4	5	6	5	4	5	5	6	5	6	4	5	5	4	5	5	4	5	4	5	5	4	4	6	4	4	3	3	无
1591	1	1	3	2	3	1	1	1	1	2	1	7	7	7	7	7	7	7	7	7	7	7	7	7	7	7	7	7	7	7	7	7	7	7	7	7	7	7	7	7	7	7	7	无
1592	1	1	1	1	2	3	1	1	1	1	2	3	4	3	4	3	4	3	4	3	4	3	4	3	4	3	4	3	4	3	4	3	4	3	4	3	4	3	4	3	4	3	4	阿巴阿巴，
1593	1	3	3	2	4	1	1	3	2	1	1	6	6	6	6	6	6	6	6	6	6	6	6	6	6	6	6	6	6	6	6	5	5	5	5	5	5	5	5	5	5	5	5	无，如果能再多一些专业课类型实践就更好了
1594	2	1	3	2	4	1	1	1	1	1	2	7	4	3	6	6	6	6	5	4	4	4	5	4	1	2	5	5	3	3	2	1	6	6	6	3	5	1	5	3	4	3	3	无
1595	1	1	3	2	4	1	1	5	2	3	4	4	4	4	4	4	4	4	4	4	4	4	4	4	4	4	4	4	4	4	4	4	4	4	4	4	4	4	4	4	4	4	4	无
1596	2	2	3	2	4	1	1	3	2	2	1	3	3	3	5	4	5	6	6	4	3	2	3	2	3	3	3	6	3	4	2	2	4	2	4	2	2	2	6	4	4	4	3	无
1597	1	1	3	2	4	1	1	5	2	2	1	3	3	3	3	3	4	5	2	3	3	5	2	3	3	3	3	4	4	4	4	4	4	4	4	4	4	3	5	4	4	4	4	无
1598	2	1	3	2	3	2	2	4	2	2	4	7	4	5	6	4	3	4	3	3	4	3	3	3	3	3	4	4	2	4	3	4	4	4	5	3	2	4	4	4	4	4	4	无
1599	1	1	3	2	2	3	3	3	1	1	2	6	6	6	6	6	6	6	6	6	6	6	6	6	6	6	6	6	6	6	6	6	6	6	6	6	6	6	6	6	6	6	6	无
1600	1	1	5	2	4	2	1	2	2	1	1	7	7	4	4	4	4	4	4	4	4	4	4	4	4	4	4	4	4	4	4	4	4	4	4	4	4	4	4	4	4	4	4	无
1601	2	1	3	2	4	2	2	3	1	1	1	5	5	5	5	4	4	4	4	4	4	4	4	4	3	3	3	6	6	6	7	6	6	6	6	6	6	6	6	6	6	6	6	对于我来说作用很大
1602	1	1	3	2	2	3	1	5	2	2	1	4	4	4	4	4	4	4	4	4	4	4	4	4	4	4	4	4	4	4	4	4	4	4	4	4	4	4	4	4	4	4	4	无
1603	1	1	3	2	2	1	1	3	2	3	4	7	1	7	4	7	4	4	4	4	4	4	4	4	4	4	4	4	4	4	4	4	4	4	4	7	7	7	7	7	7	7	7	无
1604	2	4	3	2	2	3	3	3	1	1	3	5	5	5	5	5	5	5	5	5	5	5	5	6	6	6	6	6	6	6	6	6	6	6	6	5	5	5	5	5	6	6	6	无
1605	1	1	3	2	2	3	2	2	1	1	4	4	4	4	4	4	4	4	4	4	4	4	4	4	4	4	4	4	4	4	4	4	4	4	4	4	4	4	4	4	4	4	4	没有
1606	1	3	1	1	3	1	2	3	2	3	1	6	6	6	6	6	6	6	6	6	6	6	6	6	6	6	6	6	6	6	6	6	6	6	6	6	6	6	6	6	6	6	6	无
1607	1	1	3	2	2	2	1	3	1	2	4	3	3	3	3	5	5	5	5	4	4	4	4	4	3	4	3	5	3	3	3	3	3	3	3	5	5	5	7	6	4	4	4	无
1608	2	4	3	2	2	3	1	3	1	2	2	6	6	5	3	5	4	6	6	6	6	6	6	5	6	3	4	5	5	5	5	3	6	3	5	4	3	4	4	3	3	4	2	无
1609	1	1	1	2	2	2	2	1	2	2	2	7	6	7	7	7	7	7	6	7	7	7	7	6	6	7	7	7	7	7	7	7	7	7	7	7	7	7	7	7	7	7	7	无
1610	2	3	1	1	2	1	1	1	2	1	1	4	4	4	4	4	4	4	4	4	4	4	4	4	4	4	4	4	4	4	4	4	4	4	4	4	4	4	4	4	4	4	4	无
1611	2	2	3	2	1	2	3	1	1	2	1	7	5	5	7	7	6	7	6	6	7	7	7	7	7	7	7	7	7	7	7	7	7	7	7	5	5	5	7	7	7	7	7	无
1612	2	4	2	2	4	1	1	3	1	1	3	3	4	5	5	2	3	2	4	4	3	5	5	3	3	3	4	5	5	4	4	3	7	3	4	5	4	5	5	5	4	4	4	无
1613	1	2	2	1	2	2	2	4	2	3	1	4	3	3	2	4	3	4	3	3	4	3	3	3	4	4	3	4	3	4	4	3	4	4	3	3	4	4	3	4	4	3	4	没有
1614	2	1	3	1	1	1	1	1	1	1	1	5	5	6	6	7	6	7	6	7	7	7	7	7	7	7	7	7	7	7	7	7	7	7	7	7	7	7	7	7	7	7	7	无
1615	2	3	2	1	2	1	1	1	1	3	1	2	2	2	2	2	2	2	2	2	2	2	2	2	2	2	2	2	2	2	2	2	2	2	2	2	2	2	2	2	2	2	2	无
1616	1	2	5	1	2	2	2	5	2	2	2	5	3	5	4	5	1	4	5	1	5	5	1	6	5	5	1	5	5	5	5	5	7	2	6	5	6	5	2	5	5	5	6	没有不足
1617	2	1	3	2	4	2	2	3	2	3	1	4	4	4	4	4	4	4	4	4	4	4	4	4	4	4	4	4	4	4	4	4	4	4	4	4	4	4	4	4	4	4	4	无
1618	1	3	1	1	1	3	3	2	1	1	1	7	7	7	7	7	7	7	7	7	7	7	7	7	7	7	7	7	7	7	7	7	7	7	7	7	7	7	7	7	7	7	7	无
1619	2	1	3	2	4	1	1	3	2	1	2	7	7	7	7	7	7	7	7	7	7	7	7	7	7	7	7	7	7	7	7	7	7	7	7	7	7	7	7	7	7	7	7	无
1620	1	4	3	2	4	1	1	1	2	2	2	7	7	7	7	7	7	7	7	7	7	7	7	7	7	7	7	7	7	7	7	7	7	7	7	7	7	7	7	7	7	7	7	无
1621	2	1	3	2	2	3	3	3	2	1	4	4	4	4	4	4	4	4	4	4	4	4	4	4	4	4	4	4	4	4	4	4	4	4	4	4	4	4	4	4	4	4	4	不
1622	1	2	3	2	3	1	1	4	2	2	1	4	4	4	4	4	4	4	4	4	4	4	4	4	4	4	4	4	4	4	4	4	4	4	4	4	4	4	4	4	4	4	4	无
1623	2	1	3	2	2	1	1	1	1	1	1	6	6	6	6	6	6	6	6	6	6	6	6	6	6	6	6	6	6	6	6	6	6	6	6	6	6	6	6	6	6	6	6	无
1624	1	1	2	1	4	1	1	5	2	1	1	4	4	4	4	4	4	4	4	4	4	4	4	4	4	4	4	4	4	4	4	4	4	4	4	4	4	4	4	4	4	4	4	无
1625	2	2	3	2	4	1	1	2	1	1	1	7	7	7	7	7	7	5	4	4	5	6	4	5	5	4	5	6	5	6	4	4	6	4	5	5	6	6	4	6	5	5	6	提升就业技能吧
1626	1	2	2	1	4	1	1	5	2	1	3	6	4	7	5	5	5	5	5	5	6	5	6	5	6	6	6	5	6	5	6	5	5	5	6	5	5	6	6	5	5	5	5	无
1627	2	1	2	2	2	2	2	3	2	2	1	7	5	6	7	7	7	7	6	4	4	5	5	5	4	5	4	4	3	3	3	3	4	5	5	5	3	3	3	3	3	4	3	增加实践课程
1628	2	1	3	2	2	1	1	1	2	1	3	7	7	7	7	7	7	7	7	7	7	7	7	7	7	7	7	7	7	7	7	7	7	7	7	7	7	7	7	7	7	7	7	无
1629	2	1	2	2	1	4	2	1	1	1	1	5	1	4	4	6	6	6	5	4	5	6	6	4	3	4	3	5	4	3	3	3	5	4	4	6	6	6	6	4	3	4	5	无
1630	1	1	3	2	2	2	2	2	2	2	2	1	1	1	1	1	1	1	1	1	1	1	1	1	1	1	1	4	4	4	4	4	7	7	4	3	4	3	5	3	5	5	5	乌
1632	1	1	3	2	2	2	2	5	2	2	4	4	4	4	4	4	4	4	4	4	4	4	4	4	4	4	4	4	4	4	4	4	4	4	4	4	4	4	4	4	4	4	4	五
1633	2	4	3	2	4	1	1	3	2	1	3	5	5	5	5	5	4	6	5	5	5	5	5	5	5	5	5	5	5	5	5	5	5	4	5	7	7	6	7	5	5	6	5	提供实质性的实习岗位而不是走过场
1634	1	2	5	1	4	4	2	3	2	2	1	4	4	4	4	3	3	3	3	2	3	3	3	2	2	2	2	2	2	2	2	2	2	2	2	2	2	2	2	2	2	3	3	没有
1635	1	2	2	1	2	1	1	1	1	1	1	4	4	4	4	4	4	4	4	4	4	4	4	4	4	4	4	4	4	4	4	4	4	4	4	4	4	4	4	4	4	4	4	无
1636	1	1	1	1	2	1	1	5	2	1	4	6	4	3	7	4	5	3	6	4	4	4	3	3	5	5	5	5	4	5	3	4	3	2	4	4	4	4	4	4	4	4	4	无
1637	2	1	3	2	4	1	2	1	2	2	1	6	6	5	5	3	5	3	4	5	4	7	6	6	6	6	7	6	5	5	6	5	6	5	6	6	6	6	5	6	7	6	5	无
1638	2	4	3	2	1	2	2	2	2	1	4	4	4	4	4	4	4	4	4	4	4	4	4	4	4	4	4	4	4	4	4	4	4	4	4	4	4	4	4	4	4	4	4	无
1640	2	1	2	1	2	2	3	1	1	1	1	6	5	6	6	6	6	6	4	4	4	6	7	6	6	6	6	6	6	6	6	4	6	6	6	5	5	5	6	5	5	6	5	无
1641	2	1	3	2	4	1	1	3	2	2	2	4	4	4	4	5	5	5	5	5	5	5	5	5	5	5	5	5	5	5	5	5	5	5	5	6	6	6	6	5	5	5	5	无
1642	2	2	2	1	2	2	1	1	1	1	1	2	2	2	2	2	2	2	2	2	2	2	2	2	2	2	2	2	2	2	2	2	2	2	2	2	2	2	2	2	2	2	2	无
1643	2	4	2	2	3	2	2	4	2	2	3	7	7	7	7	7	7	7	7	7	7	7	7	7	7	7	7	7	7	7	7	7	7	7	7	7	7	7	7	7	7	7	7	无
1644	1	1	2	2	4	1	1	3	1	1	1	3	3	3	3	4	3	4	3	3	3	4	4	2	2	3	2	4	3	2	2	2	2	2	2	3	4	7	7	3	3	3	3	无
1645	2	1	3	2	2	3	3	3	2	1	4	5	6	5	7	4	4	4	4	6	5	6	6	4	4	4	4	7	7	7	7	3	5	4	5	4	4	4	4	4	4	4	4	无
1646	1	1	3	2	2	2	2	5	2	2	1	5	4	6	7	7	7	7	7	7	6	5	5	7	7	7	5	5	5	6	5	3	3	7	4	4	4	4	7	4	5	5	4	暂无
1647	1	1	3	2	1	1	2	4	2	1	1	5	3	5	4	4	4	3	4	5	3	5	4	5	4	5	4	3	4	3	3	4	5	4	3	4	3	4	3	3	3	5	4	无
1648	2	1	5	2	4	1	1	2	2	1	1	5	4	5	4	2	3	2	3	5	6	4	5	6	5	5	6	5	6	6	3	4	5	6	4	5	4	6	4	4	5	6	5	无
1649	1	1	1	1	3	1	1	3	2	2	4	4	4	4	4	4	4	4	4	4	4	4	4	4	4	4	4	4	4	4	4	4	4	4	4	4	4	4	4	4	4	4	4	无
1650	2	1	2	1	2	2	1	5	2	3	2	6	4	2	7	7	7	7	7	3	4	4	4	7	7	4	5	4	4	4	4	4	4	4	4	1	1	1	6	1	1	1	1	无
1651	1	1	2	2	1	1	1	4	2	3	4	7	7	7	7	7	7	7	7	7	7	7	7	7	7	7	7	7	7	7	7	7	7	7	7	7	7	7	7	7	7	7	7	无
1652	1	1	3	2	4	1	1	1	1	1	4	3	3	3	3	3	3	3	3	3	3	3	3	3	3	3	3	3	3	3	3	3	3	3	3	3	3	3	3	3	3	3	3	无
1653	2	1	3	2	4	2	2	1	2	2	4	3	3	2	5	3	2	5	3	3	4	3	4	4	4	6	6	3	3	3	3	4	5	4	5	4	3	3	5	3	5	5	3	无
1654	2	1	5	2	2	2	2	4	1	1	1	5	5	4	5	4	3	4	3	3	5	6	6	4	3	3	3	5	3	3	2	2	3	2	2	3	3	3	3	3	4	4	4	无
1655	2	1	2	2	2	2	2	1	2	1	4	5	5	4	5	3	3	4	3	6	4	4	4	4	5	4	3	4	4	3	5	4	5	5	5	4	4	4	4	3	4	4	3	想要更多实习机会与实操课程
1656	1	3	3	1	2	2	1	1	1	1	3	7	7	7	4	4	6	6	6	7	7	7	7	7	7	7	7	7	7	7	7	7	7	7	7	4	4	4	4	7	7	7	7	无
1657	2	1	3	2	3	1	1	3	2	1	1	4	3	3	3	4	3	3	3	3	3	3	3	3	3	3	4	4	3	4	3	1	2	2	2	4	4	4	4	4	4	4	4	无
1658	2	1	3	2	4	2	1	1	2	1	4	7	7	7	7	7	7	7	7	7	7	7	7	7	7	7	7	7	7	7	7	7	7	7	7	7	7	7	7	7	7	7	7	有帮助
1659	2	1	3	2	2	2	2	3	1	2	4	4	3	4	4	4	4	4	4	4	4	4	4	4	4	4	4	4	4	4	4	4	4	4	4	4	4	4	4	5	5	5	5	无
1660	2	1	3	2	3	1	1	3	2	3	4	5	3	4	5	4	4	5	4	4	4	4	4	4	4	4	4	4	4	4	4	4	4	4	4	4	4	4	4	4	4	4	4	无
1661	2	1	3	2	4	3	1	2	2	1	4	3	2	4	6	4	4	5	4	4	4	4	4	4	4	4	4	5	4	4	4	4	4	4	4	4	4	4	4	4	4	4	4	有帮助
1662	2	4	2	2	4	1	2	1	2	1	1	7	6	6	7	7	6	6	6	7	7	6	3	3	7	7	7	7	4	7	5	4	7	5	7	7	7	7	7	7	7	5	7	无
1663	2	4	2	2	2	3	2	4	1	1	1	6	6	6	6	6	5	4	4	6	6	6	6	5	4	4	5	5	5	5	4	4	4	4	6	5	5	5	5	5	5	5	5	无
1664	2	1	3	2	2	2	2	2	2	1	2	3	2	2	4	3	3	4	4	3	3	3	3	4	4	4	4	5	5	5	5	3	4	3	4	4	3	3	4	5	5	5	4	无
1666	2	1	2	2	4	1	1	4	2	2	1	1	1	6	6	2	2	7	2	2	2	2	2	2	2	2	2	2	2	2	2	2	2	2	2	2	2	2	2	2	2	2	2	无
1667	1	1	3	2	2	1	2	4	2	2	1	4	4	4	4	4	4	4	4	4	4	4	4	4	4	4	4	4	4	4	4	4	4	4	4	4	4	4	4	4	4	4	4	多开设专业课程
1668	1	1	1	1	4	2	2	4	2	3	2	4	4	4	4	3	3	3	4	3	3	3	5	5	4	6	4	5	4	4	3	2	3	3	3	3	4	4	3	4	4	3	3	无
1669	2	1	3	2	4	1	1	4	2	1	4	4	3	3	6	5	5	4	4	4	3	6	5	5	5	6	6	6	3	5	3	4	5	4	4	6	6	5	6	5	4	6	6	无
1670	2	1	3	2	4	1	1	3	2	1	4	6	5	5	5	5	5	5	6	5	6	6	5	6	6	6	6	6	6	6	5	5	7	6	6	7	7	7	7	7	6	6	6	无
1671	2	3	3	1	2	2	1	2	1	1	2	6	4	4	4	4	4	4	4	4	5	5	5	4	4	4	4	4	4	4	4	4	4	4	4	4	4	4	4	4	4	4	4	无
1672	1	4	3	2	3	2	2	4	2	3	3	4	3	4	4	5	4	5	4	4	5	4	4	5	4	4	5	5	4	4	3	4	5	4	4	5	4	4	6	5	4	4	4	无
1673	2	1	2	2	2	2	3	1	2	1	4	7	2	6	7	4	4	3	6	5	5	5	5	4	4	5	6	7	7	6	4	4	5	3	4	4	3	4	5	3	3	4	3	少点形式
1674	2	2	3	2	2	2	2	1	1	2	1	5	4	5	5	5	5	4	5	5	5	5	5	5	5	5	5	5	5	5	5	5	5	5	5	5	5	3	5	6	5	4	5	无
1675	2	1	3	2	2	2	1	4	2	1	1	7	5	5	7	7	7	7	3	1	1	1	1	1	1	1	1	1	1	1	1	1	2	1	4	1	2	2	1	1	1	1	1	无
1676	2	2	3	2	2	3	3	4	2	2	1	5	5	5	5	5	4	5	5	5	5	5	5	5	5	5	5	5	5	5	5	5	5	5	5	6	4	5	4	6	4	5	3	无
1677	2	1	3	2	2	3	3	3	2	2	4	6	3	4	2	7	5	6	3	3	3	5	2	2	3	4	3	6	5	2	2	2	2	4	2	3	3	3	4	2	5	2	4	老师可以普及很多课外知识
1678	2	1	3	2	4	2	3	2	2	2	2	4	4	4	4	4	4	4	4	4	4	4	4	4	4	4	4	4	4	4	4	4	4	4	4	4	4	4	4	4	4	4	4	无
1679	1	1	3	2	4	2	2	2	2	1	4	4	4	4	4	4	4	4	4	4	4	4	4	4	4	4	4	4	4	4	4	4	4	4	4	4	4	4	4	4	4	4	4	无
1680	2	1	3	2	2	3	2	1	2	1	1	7	7	7	7	7	7	7	7	7	7	7	7	7	7	7	7	7	7	7	7	7	7	7	7	7	7	7	7	7	7	7	7	无
1681	1	1	3	2	3	1	1	3	2	1	1	7	7	7	7	7	7	7	7	7	7	7	7	7	7	7	7	7	7	7	7	7	7	7	7	7	7	7	7	7	7	7	7	无
1682	2	1	2	2	1	4	4	1	2	3	4	1	1	1	1	1	1	1	1	7	7	7	7	7	7	7	7	7	7	7	7	7	7	7	7	7	7	7	7	7	7	7	7	可以
1683	2	1	3	2	4	3	3	5	2	2	4	3	2	2	4	2	2	2	4	4	3	4	4	3	3	3	4	6	4	3	4	3	3	3	4	4	3	3	3	3	3	3	3	没有
1684	2	1	3	2	4	1	1	2	1	2	1	5	5	5	5	4	4	7	6	6	6	6	6	6	6	6	6	6	6	6	6	6	6	6	6	6	6	6	6	6	6	6	5	我认为我们这个专业最主要的是通过实践与理论相结合的方法来帮助我提升自己的专业技能
1685	1	1	3	2	2	1	1	5	2	1	1	4	1	1	4	1	1	4	4	1	4	4	4	7	1	4	4	7	1	1	4	1	7	4	4	4	4	7	4	4	4	4	4	无
1686	2	1	3	2	4	1	2	4	1	2	1	5	5	5	4	4	4	4	4	4	4	4	4	4	4	5	4	5	4	5	4	5	4	5	4	3	5	4	4	5	4	4	4	无
1687	2	1	3	2	4	2	2	3	2	1	1	4	4	4	4	4	4	4	4	4	4	4	4	4	4	4	4	4	4	4	4	4	4	4	4	4	4	4	4	4	4	4	4	无
1688	2	1	3	2	2	3	2	2	2	2	4	5	4	4	4	4	4	4	4	4	4	4	4	4	4	4	4	4	4	4	4	4	4	4	4	4	4	4	4	4	4	4	4	无
1689	1	1	3	2	4	1	1	3	2	3	4	1	1	1	7	4	3	5	3	4	5	4	4	5	4	5	4	5	4	5	4	5	4	4	4	5	5	5	5	5	3	3	3	无
1690	1	1	3	2	2	3	2	1	1	1	1	3	4	4	4	5	4	4	4	5	4	3	4	5	4	3	4	5	3	3	3	3	3	3	3	4	4	4	4	4	4	4	4	无
1691	2	1	3	2	2	2	2	1	2	1	4	7	4	6	7	4	4	6	6	6	7	6	6	7	7	5	7	7	6	5	4	3	6	5	6	6	6	6	7	7	5	6	7	结合社会职业市场而不是仅仅是考试
1692	2	1	2	2	4	1	1	2	2	3	1	5	5	5	5	2	2	3	2	4	4	4	4	3	3	4	4	5	3	3	5	3	5	4	6	4	4	4	4	3	3	3	3	无
1693	2	1	3	2	4	3	1	1	1	2	1	7	6	6	7	7	7	7	7	7	6	6	7	6	2	6	6	7	6	7	7	6	7	7	7	7	7	7	7	6	7	7	6	无
1694	2	2	2	2	2	2	2	3	1	1	4	3	3	3	3	3	3	3	3	3	3	3	3	3	3	3	3	3	3	3	3	3	3	3	3	3	3	3	3	3	3	3	3	无
1695	2	1	3	2	4	1	1	2	1	1	1	7	4	5	5	7	6	6	5	5	5	5	5	4	3	4	4	5	4	4	4	4	5	5	5	5	5	5	5	5	5	5	5	实时政策
1696	1	1	5	2	4	1	1	3	2	3	2	3	3	3	3	2	2	2	2	2	2	2	2	2	2	2	2	2	2	2	2	2	2	2	2	2	2	2	2	2	2	2	2	无
1697	1	1	5	2	1	2	1	2	1	1	1	7	7	7	7	7	7	7	7	7	7	7	7	7	7	7	7	7	7	7	7	7	7	7	7	7	7	7	7	7	7	7	7	无
1698	2	1	3	1	3	1	2	1	2	2	2	7	7	7	7	7	7	7	7	7	7	7	7	4	5	4	4	4	4	4	4	4	4	4	4	4	4	4	4	4	4	4	4	无
1699	2	1	2	1	3	2	2	3	2	2	2	5	4	3	6	5	5	3	4	5	4	5	4	5	4	5	6	5	5	6	4	3	4	5	4	6	5	5	4	5	4	5	4	无
1700	2	1	5	1	4	1	2	2	2	1	4	1	1	4	1	3	2	3	1	4	4	1	3	3	3	3	3	3	3	3	3	3	3	3	3	3	3	3	3	3	3	3	3	没有
1701	2	1	3	2	4	1	1	3	1	2	1	6	6	5	4	5	4	3	4	3	4	3	3	3	3	3	3	4	3	4	3	3	3	3	3	4	4	4	4	3	4	4	4	无
1702	2	4	3	2	2	2	2	2	2	1	3	7	7	7	7	7	7	7	7	7	7	7	7	7	7	7	7	7	7	7	7	7	7	7	7	7	7	7	7	7	7	7	7	无
1703	1	1	3	2	4	1	1	3	2	1	4	1	1	1	1	1	1	1	1	1	1	1	1	1	1	1	1	1	1	1	1	1	1	1	1	1	1	7	6	4	7	5	5	无
1704	2	1	5	2	2	3	3	2	1	1	1	7	7	4	7	4	4	7	4	4	4	4	4	4	4	4	4	7	7	7	7	7	7	7	7	6	6	4	6	7	7	7	7	无
1705	2	1	3	2	2	4	3	2	1	2	1	4	3	3	6	5	4	5	5	4	4	3	3	5	3	3	5	5	3	4	3	3	3	5	5	5	5	4	6	4	4	5	4	无
1706	1	1	3	2	2	3	3	3	2	2	4	7	5	4	7	6	6	6	5	5	6	5	4	7	7	7	6	7	6	7	6	7	7	7	7	7	7	7	7	7	7	7	7	无
1707	1	1	3	2	4	2	2	2	1	1	4	5	5	5	5	1	1	1	1	2	5	5	5	4	4	4	4	4	4	4	4	4	4	4	4	3	4	4	6	4	4	4	4	减少点没有意义的课什么劳务啊，可以多让同学们多选点选修课
1708	2	2	3	2	3	1	1	3	2	1	1	5	4	4	6	4	4	4	5	5	5	5	5	5	5	5	5	5	5	5	4	4	4	4	4	4	4	4	4	4	4	4	4	无
1709	2	1	3	2	2	3	2	1	1	1	1	5	6	6	5	4	3	5	5	7	7	7	7	5	4	6	7	7	5	5	6	4	6	7	7	6	7	6	6	5	6	7	7	无
1710	2	1	5	1	3	1	1	2	1	1	1	4	4	4	4	4	4	4	4	4	4	4	4	4	4	4	4	4	4	4	4	4	4	4	4	4	4	4	4	4	4	4	4	无
1711	2	1	2	2	2	3	3	2	1	2	4	4	4	4	4	4	4	4	4	4	4	4	4	4	4	4	4	4	4	4	4	4	4	4	4	4	4	4	4	4	4	4	4	没有
1712	2	2	3	2	2	3	3	1	2	1	4	7	7	6	6	6	6	6	6	6	6	6	6	6	6	6	6	6	6	6	6	6	6	6	6	6	6	6	6	6	6	6	6	无
1713	2	1	3	2	2	2	2	2	2	1	1	4	4	4	4	4	4	4	4	4	4	4	4	4	4	4	4	4	4	4	4	4	4	4	4	4	4	4	4	4	4	4	4	希望能运用具体案例。
1714	1	1	3	2	4	2	1	4	2	2	4	4	4	4	4	5	5	4	4	5	5	4	4	5	4	6	4	6	5	5	6	5	5	5	5	6	6	6	6	6	6	6	6	无
1715	2	1	3	2	2	3	3	2	1	1	4	4	5	4	7	4	5	5	5	3	5	5	5	5	6	4	6	7	4	4	5	6	6	5	5	6	6	7	6	6	6	7	5	没有
1716	2	1	3	2	3	1	1	3	1	1	4	5	4	3	3	6	4	6	5	5	5	6	4	5	5	5	5	5	5	6	5	3	3	3	6	4	4	4	4	4	4	4	4	暂时没有
1717	1	4	3	2	2	2	2	3	1	1	3	4	4	4	4	4	4	4	4	4	4	4	4	4	4	4	4	4	4	4	4	4	4	4	4	4	4	4	4	4	4	4	4	无
1718	2	1	5	2	2	2	2	4	1	1	1	4	4	3	7	5	5	6	4	4	5	5	5	5	5	5	4	5	3	3	4	3	5	5	5	4	3	4	7	4	4	4	2	无
1719	1	1	3	2	2	2	2	4	2	1	4	7	7	7	7	7	7	7	7	7	7	7	7	7	7	7	7	7	7	7	7	7	7	7	7	7	7	7	7	7	7	7	7	无
1720	1	1	3	2	4	2	2	4	2	1	1	3	2	2	5	6	6	6	4	3	4	4	3	3	3	3	3	3	3	4	5	5	4	5	2	2	5	4	5	3	5	4	4	无
1721	2	1	3	2	3	3	3	3	1	1	4	7	6	7	6	5	6	4	5	4	5	6	4	6	6	6	6	6	6	6	6	6	6	6	6	6	6	6	6	6	6	6	6	教一些实用知识
1722	2	3	3	1	1	4	4	4	1	2	1	2	5	5	5	4	4	5	6	3	5	5	4	4	6	5	5	3	5	3	5	5	1	5	3	2	5	5	2	3	5	3	5	没有
1723	2	1	3	2	2	2	3	2	1	1	4	5	5	4	4	4	4	4	4	4	4	4	4	4	4	4	4	4	4	4	4	4	4	4	4	7	7	7	7	7	7	7	7	无
1724	2	1	3	2	2	2	2	1	2	1	4	4	3	5	4	4	4	4	5	4	5	5	5	4	3	3	5	6	5	7	3	3	5	3	5	4	5	4	5	5	3	6	4	帮助明确想要深造学业应该往哪些方面努力，重点学什么
1725	2	1	3	2	2	2	2	2	2	1	4	4	2	4	5	2	2	6	5	2	4	5	5	4	4	4	4	4	4	4	4	4	4	4	4	4	4	4	4	4	4	4	4	无
1726	2	2	3	1	2	3	2	1	1	1	4	7	7	7	7	7	7	7	7	7	7	7	7	7	7	7	7	7	7	7	7	7	7	7	7	7	7	7	7	7	7	7	7	无
1727	2	1	3	2	2	1	1	2	1	1	4	7	7	7	7	7	7	7	7	7	7	7	7	7	7	7	7	7	7	7	7	7	7	7	7	7	7	7	7	7	7	7	7	无
1728	2	3	2	1	2	3	3	1	1	1	1	7	7	7	7	7	7	7	7	7	7	7	7	7	7	7	7	7	7	7	7	7	7	7	7	7	7	7	7	7	7	7	7	无
1729	1	1	3	2	2	2	2	4	2	2	1	4	4	4	4	4	4	4	4	4	4	4	4	4	4	4	4	4	4	4	4	4	4	4	4	4	4	4	4	4	4	4	4	无
1730	1	1	3	2	4	1	1	1	1	2	2	5	5	5	5	5	5	5	5	5	5	5	5	5	5	5	5	5	5	5	5	5	5	5	5	5	5	5	5	5	5	5	5	无
1731	2	3	2	1	4	1	1	3	2	3	4	5	5	5	5	5	5	5	5	5	5	5	5	5	5	5	5	5	5	5	5	5	5	5	5	5	5	5	5	5	5	5	5	无
1732	1	1	3	2	4	1	1	5	2	1	1	5	2	2	5	6	5	6	3	4	4	4	4	4	4	4	4	7	7	7	7	3	3	3	3	3	3	3	3	5	5	5	5	无
1733	2	1	3	2	4	1	1	5	2	2	1	7	7	7	7	7	7	7	7	7	7	7	7	7	7	7	7	7	7	7	7	7	7	7	7	7	7	7	7	7	7	7	7	行
1734	2	1	3	2	2	3	1	1	1	1	1	7	7	7	7	7	7	7	7	7	7	7	7	7	7	7	7	7	7	7	7	7	7	7	7	7	7	7	7	7	7	7	7	无
1735	2	1	3	2	4	1	1	3	2	2	1	4	4	4	4	4	4	4	4	4	4	4	4	4	4	4	4	4	4	4	4	4	4	4	4	4	4	4	4	4	4	4	4	无
1736	2	3	3	2	1	4	3	4	2	2	4	5	5	5	5	5	5	5	5	5	5	5	5	5	5	5	5	5	5	5	5	5	5	5	5	5	5	5	5	5	5	5	5	加油
1737	1	3	3	2	2	2	1	1	1	1	1	7	7	7	7	7	7	7	7	7	7	7	7	7	7	7	7	7	7	7	7	7	7	7	7	7	7	7	7	7	7	7	7	无
1738	1	3	3	2	4	1	1	3	1	3	1	4	4	3	3	4	3	3	4	3	4	3	3	3	4	3	3	3	4	2	2	2	2	2	2	3	3	3	4	3	3	3	3	无
1739	2	3	5	2	4	1	1	4	2	1	2	4	4	4	4	4	4	4	4	4	4	4	4	4	4	4	4	4	4	4	4	4	4	4	4	4	4	4	4	4	4	4	4	无
1740	2	1	3	2	4	1	1	3	2	3	1	4	3	6	5	4	2	6	1	2	2	2	2	2	3	4	5	5	2	3	3	2	4	2	5	2	2	2	4	4	3	4	3	可以多介绍一下职业
1741	1	3	3	2	3	1	1	1	1	1	1	6	5	6	6	5	5	4	4	5	4	4	4	4	4	4	4	5	6	5	5	5	5	6	6	5	5	5	5	5	4	5	4	无
1742	2	3	3	2	4	1	1	1	1	1	1	4	4	4	4	4	4	4	4	4	4	4	4	4	4	4	4	4	4	4	4	4	4	4	4	4	4	4	4	4	4	4	4	无
1743	1	3	3	2	4	4	4	4	1	1	3	7	7	7	7	7	7	7	7	7	7	7	7	7	7	7	7	7	7	7	7	7	7	7	7	7	7	7	7	7	7	7	7	无
1744	2	3	3	2	4	1	1	2	2	2	3	4	4	4	4	4	4	4	4	4	4	4	4	4	4	4	4	4	4	4	4	4	4	4	4	4	4	4	4	4	4	4	4	无
1745	2	3	3	2	4	1	1	1	2	1	1	5	5	5	5	5	5	5	5	5	5	5	5	5	5	5	5	5	5	5	5	5	5	5	5	5	5	5	5	5	5	5	5	五
1746	1	3	3	2	4	1	1	5	2	3	3	4	4	4	4	4	4	4	4	4	4	4	4	4	4	4	4	4	4	4	4	4	4	4	4	4	4	4	4	4	4	4	4	无
1747	2	3	3	2	4	1	1	4	2	2	1	4	4	4	5	4	4	4	4	3	3	3	3	4	4	3	5	4	3	4	3	4	3	4	3	4	3	3	4	3	4	3	3	没有
1748	1	3	3	2	2	2	1	2	1	2	3	6	2	4	4	6	6	6	6	6	6	6	6	6	6	6	6	6	6	6	6	6	6	6	6	6	6	6	6	6	6	6	6	无
1749	1	3	5	2	4	2	2	3	2	1	1	7	7	7	7	7	7	7	7	7	7	7	7	7	7	7	7	7	7	7	7	7	7	7	7	7	7	7	7	7	7	7	7	无
1750	1	3	3	2	2	2	1	5	2	3	4	4	1	3	5	6	6	7	3	2	3	4	3	6	6	7	5	4	4	4	3	1	1	1	1	4	4	4	4	4	3	3	3	无
1751	2	3	3	2	2	2	2	1	1	1	1	6	6	6	6	5	5	5	5	4	4	4	4	5	5	5	5	6	6	6	6	6	6	6	6	7	7	7	7	4	4	5	5	暂无
1752	2	3	3	2	4	1	1	2	2	2	3	5	4	4	4	4	4	4	4	4	4	5	4	4	4	4	4	4	4	4	4	4	4	4	4	4	4	4	4	4	4	4	4	对职业规划的帮助不够实际
1753	2	3	3	2	4	1	3	2	1	2	3	7	6	6	6	3	3	6	2	5	5	5	5	5	5	5	5	5	5	5	5	5	5	5	5	5	5	5	5	5	5	5	5	无
1754	2	3	3	2	2	2	2	4	1	1	1	4	4	4	4	4	4	4	4	4	4	4	4	4	4	4	4	4	4	4	4	4	4	4	4	4	4	4	4	4	4	4	4	无
1755	2	1	1	1	1	4	4	5	2	3	4	1	1	1	1	1	1	1	1	1	1	1	1	1	2	4	4	2	4	3	3	6	3	5	5	1	3	5	2	4	4	1	3	好
1756	2	3	3	2	4	1	2	1	2	2	1	2	2	2	2	3	3	3	3	2	2	2	2	3	2	3	3	4	3	3	3	3	3	2	3	3	3	3	3	3	3	3	3	暂时没有不好意思
1757	1	3	3	2	4	1	1	5	2	3	3	7	7	7	7	7	7	7	7	7	7	7	7	7	7	7	7	1	7	1	1	1	1	1	1	7	7	7	7	7	7	7	7	无
1758	2	3	5	2	3	1	1	2	2	2	1	4	4	4	4	4	4	4	4	4	4	4	4	4	4	4	4	4	4	4	4	4	4	4	4	4	4	4	4	4	4	4	4	无
1759	2	3	3	2	3	2	2	3	2	2	1	4	4	4	4	3	3	5	3	3	3	5	6	3	3	5	4	3	3	4	5	3	3	4	4	3	4	4	3	4	3	4	4	无
1760	2	3	3	2	2	1	1	3	1	1	4	6	3	6	4	5	5	4	6	6	5	5	6	5	4	4	4	6	7	4	4	3	5	3	4	5	4	4	4	4	4	4	3	无
1761	2	3	3	2	3	1	1	4	2	3	1	5	5	4	5	5	4	5	6	5	6	5	5	5	5	5	5	5	5	5	5	5	5	5	5	5	5	5	5	5	5	5	5	无
1762	2	3	5	2	4	1	1	5	2	3	3	5	5	5	5	5	5	5	5	6	6	6	5	6	5	6	5	6	6	5	6	6	5	5	5	5	6	5	5	5	5	6	5	没有
1763	2	3	3	2	2	3	3	4	2	2	4	7	4	2	6	5	5	5	5	5	5	5	5	5	5	3	5	5	3	3	5	5	5	5	5	5	5	5	5	5	5	4	4	无
1764	2	3	3	2	3	1	1	3	2	2	3	4	3	2	2	2	2	2	2	2	2	2	2	2	2	2	2	2	2	2	2	2	2	2	2	2	2	2	2	2	2	2	2	无
1765	2	3	3	2	3	1	1	1	1	2	3	7	7	7	7	4	4	4	5	7	7	7	7	7	7	7	7	7	7	7	7	7	7	7	7	7	7	7	7	7	7	7	7	无
1766	1	3	3	2	3	1	1	3	1	2	1	7	7	7	7	7	7	7	7	7	7	7	7	7	7	7	7	7	7	7	7	7	7	7	7	7	7	7	7	7	7	7	7	无
1767	2	3	3	2	4	3	3	1	1	1	2	6	1	2	6	4	4	4	4	4	3	3	3	3	3	3	3	5	5	4	2	1	4	5	4	6	4	6	7	5	4	4	4	无
1768	1	1	3	2	4	1	1	3	2	1	2	6	5	5	5	5	5	6	5	5	5	5	5	5	5	5	5	5	5	5	5	5	6	5	5	5	5	5	5	5	6	5	6	无
1769	2	3	3	2	4	2	1	4	2	3	3	5	3	3	6	6	6	6	6	6	6	6	6	6	6	6	6	6	4	4	4	2	2	2	2	2	3	3	5	6	6	6	6	无
1770	2	3	2	2	4	1	1	4	2	2	1	4	4	4	4	4	4	4	4	4	4	4	4	4	4	4	4	4	4	4	4	4	4	4	4	4	4	4	4	4	4	4	4	无
1771	2	3	3	2	4	1	1	5	2	2	1	5	4	4	4	5	5	5	5	5	5	5	5	5	5	5	5	5	5	5	5	5	5	5	4	5	4	6	6	6	6	6	4	无
1772	2	3	3	2	4	3	1	1	2	1	3	7	7	6	6	7	6	6	7	7	6	6	7	7	7	7	7	7	7	7	6	6	6	7	6	7	7	6	7	7	6	7	7	无
1773	1	3	5	2	4	2	2	3	2	2	1	5	5	5	5	5	5	5	5	5	5	5	5	5	5	5	5	5	5	5	5	5	5	5	5	5	5	5	5	5	5	5	5	无
1774	2	3	3	2	4	1	1	2	1	1	1	4	4	4	4	4	4	4	4	4	4	4	4	4	4	4	4	4	4	4	4	4	4	4	4	4	4	4	4	4	4	4	4	无
1775	2	3	3	2	2	2	2	3	1	2	2	7	7	7	7	7	7	7	7	7	7	7	7	7	7	7	7	7	7	7	7	7	7	7	7	7	7	7	7	7	7	7	7	无
1776	2	3	3	2	4	1	1	3	2	2	3	5	5	5	5	5	5	5	5	5	5	5	5	5	5	5	5	5	4	5	5	5	4	4	5	7	7	7	7	6	6	6	6	无
1777	2	3	2	2	3	1	1	3	2	3	2	5	5	5	5	5	5	5	5	5	5	5	5	5	5	5	5	5	4	5	4	4	5	5	4	5	4	4	5	4	5	4	5	无
1778	2	3	3	2	2	2	2	2	1	2	1	5	5	2	4	4	4	4	4	4	4	4	4	6	4	5	4	5	3	4	4	5	4	5	4	4	3	5	4	5	4	4	5	无
1779	2	3	5	2	2	2	2	1	1	1	3	7	5	5	5	6	6	6	6	6	5	5	6	7	7	6	5	7	7	7	5	7	7	5	7	7	7	7	7	7	6	7	7	无
1780	2	3	2	2	1	3	3	4	2	2	1	4	4	4	4	4	4	4	4	4	4	4	4	4	4	4	4	4	4	4	4	4	4	4	4	4	4	4	4	4	4	4	4	无
1781	2	3	3	2	2	2	2	1	1	1	2	7	7	7	7	7	7	7	7	7	7	7	7	7	7	7	7	7	7	7	7	7	7	7	7	7	7	7	7	7	7	7	7	无
1782	2	1	3	2	2	2	2	4	2	1	2	3	2	5	6	6	7	7	6	4	3	2	3	5	6	7	7	3	5	4	3	2	5	3	5	5	3	5	7	6	5	5	2	无
1783	1	3	5	2	2	1	1	4	1	1	1	7	7	7	7	7	7	7	7	7	7	7	7	7	7	7	7	7	7	7	7	7	7	7	7	7	7	7	7	7	7	7	7	无
1784	1	3	3	2	4	1	1	3	1	3	3	7	5	5	5	4	4	3	3	4	4	5	4	4	5	4	4	5	4	4	5	4	5	4	5	4	5	5	4	5	4	5	4	无
1785	2	3	2	2	4	2	2	1	2	3	1	6	6	6	6	6	5	5	5	4	4	4	6	4	4	4	4	4	4	4	4	3	4	4	4	5	5	5	5	5	5	5	5	无
1786	1	3	2	2	2	3	3	4	2	1	3	7	7	7	7	7	7	7	7	7	7	7	7	7	7	7	7	7	7	7	7	7	7	7	7	7	7	7	7	7	7	7	7	无
1787	1	3	3	2	1	2	3	5	2	3	3	7	7	7	7	7	7	7	7	7	7	7	7	7	7	7	7	7	7	7	7	7	7	7	7	7	7	7	7	7	7	7	7	无
1788	2	3	3	2	2	3	3	1	1	2	3	7	7	7	7	7	7	7	7	7	7	7	7	7	7	7	7	7	7	7	7	7	7	7	7	7	7	7	7	7	7	7	7	无
1789	1	3	3	2	1	3	1	1	1	1	4	3	3	6	6	6	6	6	6	6	6	6	3	6	6	6	6	6	6	6	5	3	4	6	4	3	3	3	4	4	3	5	6	无
1790	2	3	3	2	2	2	1	4	2	1	1	5	5	5	5	5	5	5	5	5	5	5	5	6	6	6	6	6	6	6	6	4	6	6	6	6	6	6	6	6	6	6	6	无
1792	2	3	3	2	2	3	3	1	1	1	2	7	7	7	7	7	7	7	7	7	7	7	7	7	7	7	7	7	7	7	7	7	7	7	7	7	7	7	7	7	7	7	7	无
1793	2	3	5	2	4	1	2	2	2	2	1	5	3	2	4	2	2	2	3	6	6	5	3	3	3	3	5	5	6	5	2	2	3	4	5	4	5	5	4	3	4	5	4	无
1794	2	3	3	2	4	1	1	3	2	2	1	4	4	4	4	4	4	4	4	4	4	4	4	4	4	4	4	4	4	4	4	4	4	4	4	4	4	4	4	4	4	4	4	无
1795	1	3	3	2	1	1	1	5	2	1	3	4	4	4	4	4	4	4	4	4	4	4	4	4	4	4	4	4	4	4	4	4	4	4	4	4	4	4	4	4	4	4	4	无
1796	2	3	2	2	2	2	2	1	1	1	2	1	1	1	1	5	3	6	4	7	5	5	4	4	4	4	4	7	5	4	4	4	4	4	4	4	4	4	4	4	4	4	4	无
1797	2	3	3	2	3	2	2	3	1	2	3	4	4	4	4	4	4	4	4	4	4	4	4	4	4	4	4	4	4	4	4	4	4	4	4	4	4	4	4	4	4	4	4	无
1798	2	3	5	2	4	1	1	1	2	1	1	5	5	4	4	4	5	4	4	4	5	4	5	3	4	4	5	3	5	3	4	3	4	3	4	3	4	4	3	4	5	5	4	无
1799	2	1	3	2	4	1	1	3	2	1	1	5	4	4	4	4	4	4	4	4	4	4	4	4	4	4	4	4	4	4	4	4	4	4	4	4	4	4	4	4	4	4	4	越来越好
1800	2	3	3	2	4	1	1	2	2	2	3	5	5	5	5	4	4	5	5	6	6	6	6	6	6	6	6	6	6	6	6	6	6	6	6	6	6	6	6	6	6	6	6	无
1801	2	3	2	2	2	1	1	5	2	2	2	4	6	6	6	2	2	2	5	5	5	2	2	2	2	3	2	4	4	4	2	3	3	3	3	4	5	3	3	4	4	7	5	无
1802	2	1	2	2	2	2	2	2	1	2	3	5	4	5	6	6	6	6	6	5	6	5	5	5	5	6	6	5	5	4	4	4	5	5	5	5	5	5	5	5	5	6	6	无
1803	1	3	3	2	2	2	3	4	2	2	2	7	7	7	7	7	7	7	7	7	7	7	7	7	7	7	7	7	7	7	7	7	7	7	7	7	7	7	7	7	7	7	7	否
1804	1	3	5	2	2	3	2	3	2	3	4	5	6	5	6	5	5	5	5	5	5	5	5	6	6	6	6	6	6	6	6	2	2	2	2	6	6	6	6	6	6	6	6	增加宣讲会
1805	1	3	3	1	2	3	3	5	2	3	3	4	4	4	4	4	4	4	4	4	4	4	4	4	4	4	4	5	5	3	4	5	4	3	3	5	4	4	4	5	4	4	4	无
1806	2	3	3	2	3	2	1	1	1	2	1	6	3	4	4	5	5	5	5	5	5	5	5	6	6	6	6	4	5	5	4	4	5	5	5	5	5	6	4	5	4	6	6	无
1807	2	3	3	2	3	2	1	2	1	1	3	5	1	3	5	4	4	5	4	4	4	5	5	5	5	5	5	6	4	4	3	3	5	5	5	4	4	4	5	3	5	5	5	无
1808	2	3	3	2	2	2	3	1	2	1	2	4	4	4	4	4	4	4	4	4	4	4	4	4	4	4	4	4	4	4	4	4	4	4	4	4	4	4	4	4	4	4	4	无
1809	2	3	3	2	3	1	1	4	2	3	4	4	4	4	4	4	4	4	4	4	4	4	4	4	4	4	4	4	4	4	4	4	4	4	4	4	4	4	4	4	4	4	4	无
1810	2	3	5	2	2	3	3	2	2	2	3	4	4	3	3	5	4	4	4	5	5	3	3	4	4	4	4	4	3	3	3	3	3	4	3	4	2	3	4	4	3	4	3	暂无。
1811	2	3	2	2	4	2	1	2	1	2	3	6	6	4	5	4	5	5	3	5	4	3	5	5	5	6	5	6	4	6	4	6	5	6	4	5	5	5	6	5	5	6	6	无
1812	2	3	3	2	2	2	2	5	2	1	1	4	4	4	4	4	4	4	4	4	4	4	4	4	4	4	4	4	4	4	4	4	4	4	4	4	4	4	4	4	4	4	4	无
1813	2	3	3	2	4	1	1	1	1	2	3	4	5	5	4	5	5	5	5	5	5	5	5	5	5	5	5	6	6	6	3	4	4	4	4	4	4	4	4	4	4	4	4	无
1814	2	3	3	2	2	2	2	1	2	1	3	6	2	6	5	5	5	5	5	5	5	5	5	5	5	5	5	5	5	5	5	2	2	2	5	5	4	5	5	5	5	5	5	多些社会实践
1815	1	3	2	2	2	3	3	1	1	1	3	7	7	7	7	7	7	7	7	7	7	7	7	7	7	7	7	7	7	7	7	7	7	7	7	7	7	7	7	7	7	7	7	无
1816	2	3	5	2	2	1	1	2	1	1	1	4	4	4	2	5	5	4	2	5	2	5	2	5	5	4	3	5	3	5	5	5	5	4	4	4	3	4	3	5	4	4	3	无
1817	2	1	3	2	2	2	1	1	2	1	4	5	5	3	7	5	2	6	4	5	5	4	4	6	7	7	4	6	6	3	2	1	1	1	2	1	5	6	7	6	7	7	7	一对一。职业规划。？
1818	2	3	2	2	2	1	1	2	2	2	4	7	1	7	7	7	7	7	7	7	7	7	7	7	7	7	7	7	7	7	7	7	7	7	7	7	7	7	7	7	7	7	7	无
1819	1	3	5	2	4	1	1	4	2	1	2	5	5	5	5	5	5	5	5	5	5	5	5	5	5	5	5	5	5	5	5	5	5	5	5	5	5	5	5	5	5	5	5	无
1820	2	3	5	2	4	1	1	1	2	3	1	1	2	1	4	3	3	3	4	7	7	5	3	1	1	2	4	7	7	7	2	1	5	1	1	2	1	1	1	7	7	7	7	无
1821	2	3	5	2	4	1	1	3	2	2	1	3	3	3	3	4	4	4	4	4	4	4	4	4	4	4	4	4	4	4	4	3	3	3	3	4	4	4	4	4	4	4	4	无
1822	2	3	3	2	4	1	2	1	2	3	3	4	4	3	2	3	3	2	2	3	3	4	3	5	5	3	4	5	5	5	2	1	2	2	2	2	2	2	1	5	5	5	5	无
1823	2	3	2	2	2	3	1	3	2	2	4	5	5	5	5	5	5	5	5	5	5	5	5	5	5	5	5	5	5	5	5	5	5	5	5	5	5	5	5	5	5	5	5	无
1824	2	1	3	1	3	1	1	1	1	1	1	6	6	6	6	6	6	6	6	6	6	6	6	6	6	6	6	6	6	6	6	6	6	6	6	6	6	6	6	6	6	6	6	无
1825	2	3	3	2	4	1	1	4	1	2	3	7	7	7	7	7	7	7	7	7	7	7	7	7	7	7	7	7	7	7	7	7	7	7	7	7	7	7	7	7	7	7	7	🈚️
1826	1	3	3	2	1	1	1	4	2	3	4	7	7	7	7	7	7	7	7	7	7	7	7	7	7	7	7	7	7	7	7	7	7	7	7	7	7	7	7	7	7	7	7	无
1827	2	3	3	2	2	3	3	3	1	2	1	6	5	3	3	3	3	4	3	4	3	3	3	3	3	3	3	5	5	4	4	2	4	2	2	4	4	4	4	4	4	4	4	无
1828	2	2	3	1	4	1	1	2	1	2	2	6	6	5	6	6	6	6	6	4	6	5	6	6	6	6	6	6	5	6	6	5	6	6	6	6	7	7	7	7	6	6	6	无
1829	1	2	2	1	2	3	2	5	2	1	1	6	5	6	7	5	6	5	6	6	5	6	5	6	5	6	5	6	5	6	5	6	5	6	5	6	5	6	5	6	5	6	5	无
1830	2	3	2	2	4	1	1	3	2	3	3	5	5	5	5	5	5	5	5	5	5	5	5	5	5	6	6	6	6	6	6	6	6	6	6	6	6	6	6	6	6	6	6	无
1831	2	3	3	2	2	1	1	4	1	1	1	4	3	3	4	4	4	4	4	4	4	4	4	4	4	4	4	4	4	4	4	4	4	4	4	4	4	4	4	4	4	4	4	没有
1832	2	3	2	2	4	2	2	2	1	3	1	7	7	7	7	6	6	6	6	6	6	6	6	6	6	6	6	6	6	6	6	6	6	6	6	6	6	6	6	6	6	6	6	无
1833	2	3	3	2	4	2	1	1	1	1	1	5	4	6	6	4	4	4	4	5	5	5	5	5	5	5	5	7	5	5	3	3	4	3	3	5	5	5	5	5	5	5	5	无
1834	1	3	5	2	4	4	3	2	1	2	2	4	3	3	4	4	5	4	5	5	5	4	4	5	4	6	5	4	4	4	4	3	4	5	5	4	4	4	5	5	5	5	5	实践活动增加
1835	1	3	5	2	2	1	3	5	2	3	2	5	5	5	5	5	5	5	5	5	5	5	5	5	5	5	5	5	5	5	5	5	5	5	5	5	5	5	5	5	5	5	5	无
1836	1	3	3	2	2	3	3	5	2	3	2	4	4	4	4	4	4	4	4	4	4	4	4	4	4	4	4	4	4	4	4	2	2	2	2	2	2	2	2	2	2	2	2	解决就业问题降低就业门槛
1837	2	3	3	2	4	1	1	1	2	2	1	4	2	3	5	2	3	3	3	6	6	5	4	4	4	4	4	6	6	5	4	4	5	4	6	4	4	4	4	4	4	4	4	无
1838	1	3	3	2	1	3	3	4	2	2	2	6	6	6	6	4	4	4	4	5	5	5	5	5	5	5	5	5	5	5	5	5	5	4	5	3	3	3	3	5	5	5	5	无
1839	1	3	5	2	2	1	1	4	1	2	3	4	4	4	4	4	4	4	4	4	4	4	4	4	4	4	4	4	4	4	4	4	4	4	4	4	4	4	4	4	4	4	4	少安排点课，多留点自主复习的时间
1840	2	3	2	2	2	1	2	1	2	2	4	3	1	3	4	4	3	4	5	5	6	7	7	4	3	3	4	6	7	7	4	4	6	4	4	4	4	4	4	4	4	5	4	无
1841	2	3	3	2	4	1	1	1	2	2	3	7	7	4	5	7	6	5	5	5	5	5	5	3	2	3	3	4	4	4	4	3	3	3	3	3	3	3	3	3	3	3	3	无
1842	2	3	5	2	4	1	1	2	2	2	2	6	3	3	4	4	4	4	4	4	4	4	4	4	4	4	4	4	4	4	4	4	4	4	4	4	4	4	4	4	4	4	4	无
1843	1	1	2	2	4	1	1	2	2	2	2	7	7	7	7	7	7	7	7	7	7	7	7	7	7	7	7	7	7	7	7	7	7	7	7	7	7	7	7	7	7	7	7	无
1844	2	3	3	2	2	2	2	3	2	3	4	5	5	5	5	5	5	5	5	7	7	6	6	7	7	7	7	6	6	6	6	6	6	6	6	5	6	6	6	6	6	6	6	无
1845	2	3	3	2	3	1	1	2	1	3	4	7	7	7	7	7	7	7	7	7	7	7	7	7	7	7	7	7	7	7	7	7	7	7	7	7	7	7	7	7	7	7	7	无
1846	2	3	3	2	4	1	2	2	2	1	1	7	5	5	5	7	7	7	6	7	7	6	6	6	5	6	6	7	7	7	7	5	7	5	5	7	7	7	7	7	7	7	6	无
1847	1	3	3	2	4	1	1	3	2	2	1	7	7	7	7	7	7	7	7	7	7	7	7	7	7	7	7	7	7	7	7	7	7	7	7	7	7	7	7	7	7	7	7	无
1848	2	3	2	2	4	1	1	2	2	3	1	1	3	3	3	4	4	4	4	4	4	4	4	4	5	4	5	5	4	5	6	6	5	5	4	5	4	4	5	5	3	4	5	无
1849	1	3	3	2	4	1	1	5	2	1	3	7	7	7	7	7	7	7	7	7	7	7	7	7	7	7	7	7	7	7	7	7	7	7	7	7	7	7	7	7	7	7	7	无
1850	1	3	3	2	2	2	2	5	2	3	1	4	4	4	4	4	4	4	4	4	4	4	4	4	4	4	4	4	4	4	4	4	4	4	4	4	4	4	4	4	4	4	4	无
1851	2	3	3	2	2	1	2	1	1	1	1	7	7	7	7	5	5	5	5	7	7	7	7	7	7	7	7	7	7	7	7	7	7	7	7	7	7	7	7	7	7	7	7	无
1852	2	3	3	2	4	1	1	2	2	1	2	5	5	4	5	6	6	6	6	6	6	6	6	5	4	4	5	6	6	5	4	3	4	3	4	5	5	5	6	5	5	5	5	无
1853	2	3	5	2	4	1	1	1	2	2	1	5	4	4	4	5	5	4	5	5	4	5	3	4	5	4	5	4	5	5	4	4	5	4	5	4	4	5	5	5	4	4	5	无
1854	1	3	5	2	4	1	1	4	2	2	2	5	5	5	5	5	5	5	5	5	5	5	5	5	5	5	5	5	5	5	5	5	5	5	5	5	5	5	5	5	5	5	5	无
1855	2	3	5	2	3	3	2	1	2	3	4	4	4	4	4	4	4	4	4	4	4	4	4	4	4	4	4	4	4	4	4	4	4	4	4	4	4	4	4	4	4	4	4	无
1856	1	3	5	2	4	1	1	3	2	3	1	7	7	7	7	7	7	7	7	7	7	7	7	7	7	7	7	7	7	7	7	7	7	7	7	7	7	7	7	7	7	7	7	无
1857	2	3	2	2	4	1	1	3	2	3	3	5	4	5	5	6	5	6	5	6	5	5	5	5	5	5	5	5	5	5	5	5	5	5	5	5	5	5	5	5	5	5	5	无
1858	2	3	2	2	3	2	1	4	2	2	1	5	5	5	4	4	3	5	3	4	4	3	3	4	3	5	3	5	3	5	3	3	5	5	3	5	5	3	3	5	5	3	5	无
1859	1	3	5	2	4	2	1	4	2	1	3	7	7	7	7	5	5	5	5	5	5	5	5	5	5	5	5	5	5	5	5	5	5	5	5	5	5	5	5	5	5	5	5	好
1860	2	3	2	2	4	2	1	3	1	2	1	5	5	5	5	5	5	5	5	5	5	5	5	5	5	5	5	5	5	5	5	5	5	5	5	5	5	5	5	5	5	5	5	无
1861	2	3	2	2	4	1	1	2	1	2	3	4	4	4	4	4	4	4	4	4	4	4	4	4	4	4	4	4	4	3	3	4	4	4	4	4	4	4	4	4	4	4	4	无
1862	1	3	2	2	4	2	2	4	2	2	2	3	3	3	3	3	3	3	3	3	2	3	3	3	3	3	3	3	3	3	3	3	3	3	3	2	3	2	3	2	3	2	3	🖐🏻
1863	2	3	3	2	2	2	2	2	2	1	3	5	5	5	5	6	5	5	5	5	5	5	5	5	5	5	5	5	5	5	5	5	5	5	5	5	5	5	5	5	5	5	5	无
1864	2	3	2	2	4	1	1	1	2	1	1	5	4	3	4	3	2	2	2	3	3	2	3	3	3	3	3	6	4	4	3	3	4	3	3	3	3	3	3	4	4	3	3	不注重实践
1865	2	3	2	2	2	2	2	4	2	2	1	4	4	4	4	4	4	4	4	4	4	4	4	4	4	4	4	4	4	4	4	4	4	4	4	4	4	4	4	4	4	4	4	无
1866	2	3	3	2	4	3	1	1	1	2	3	5	5	4	4	5	5	4	4	4	4	5	4	4	4	5	4	4	4	4	5	4	5	3	5	4	3	4	4	5	5	4	4	无
1867	2	3	5	2	2	1	1	3	2	2	3	4	4	4	4	4	4	4	4	4	4	4	4	4	4	4	4	4	4	4	4	4	4	4	4	4	4	4	4	4	4	4	4	无
1868	2	2	3	2	4	1	1	3	2	2	1	4	4	4	4	4	4	4	4	4	4	4	4	4	4	4	4	4	4	4	4	4	4	4	4	4	4	4	4	4	4	4	4	无
1869	2	3	3	2	1	3	3	1	2	2	1	3	3	3	3	3	3	3	3	3	3	3	3	3	3	3	3	3	3	3	3	3	3	3	3	3	3	3	3	3	3	3	3	无
1870	2	3	2	2	4	1	1	1	2	3	3	6	4	3	5	4	4	6	4	7	6	3	5	3	3	3	5	5	6	6	3	1	7	1	4	3	3	3	5	5	5	5	5	不要再弄一些小组作业了
1871	1	1	1	1	1	3	3	2	2	1	2	7	7	7	7	7	7	7	7	7	7	7	7	7	7	7	7	7	7	7	7	7	7	7	7	7	7	7	7	7	7	7	7	.
1872	1	3	2	2	2	2	2	4	2	1	1	7	7	7	7	7	7	7	7	7	7	7	7	7	7	7	7	7	7	7	7	7	7	7	7	7	7	7	7	7	7	7	7	无
1873	2	3	3	2	4	1	1	1	2	2	4	5	5	5	5	5	5	5	5	5	5	5	5	5	5	6	5	5	5	5	5	5	5	5	5	5	5	5	5	5	5	5	5	无
1874	2	3	3	2	4	1	1	1	2	1	4	7	7	7	7	7	7	7	7	7	7	7	7	7	7	7	7	7	7	7	7	7	7	7	7	7	7	7	7	7	7	7	7	无
1875	2	3	3	2	4	3	1	1	1	2	1	7	7	7	7	7	7	7	7	7	7	7	7	7	7	7	7	7	7	7	7	7	7	7	7	6	6	6	5	5	5	5	5	无
1876	1	3	3	2	2	3	2	4	2	1	1	6	6	6	6	6	6	6	6	6	6	6	6	6	6	6	6	6	6	6	6	6	6	6	6	6	6	6	6	6	6	6	6	无
1877	2	3	2	2	2	1	1	3	2	1	2	3	3	3	3	3	3	3	3	3	3	3	3	3	3	3	3	3	3	3	3	3	3	3	3	3	3	3	3	3	3	3	3	无
1878	1	3	3	2	4	1	1	4	2	3	2	4	4	4	4	4	4	4	4	4	4	4	4	4	4	4	4	4	4	4	4	4	4	4	4	4	4	4	4	4	4	4	4	无
1879	2	3	2	2	4	1	1	3	2	1	1	4	6	4	5	4	4	4	4	4	4	4	4	4	4	4	4	4	4	4	4	4	4	4	4	4	4	4	4	4	4	4	4	无
1880	2	3	3	2	2	3	3	1	1	1	1	7	7	7	7	7	7	7	7	7	7	7	7	7	7	7	7	7	7	7	7	7	7	7	7	7	7	7	7	7	7	7	7	无
1881	1	3	3	2	4	1	1	1	1	1	1	7	7	7	7	7	6	7	7	7	7	7	7	7	7	7	7	6	7	6	6	7	6	7	7	7	6	7	7	7	6	7	7	wu
1882	2	3	2	2	4	2	2	2	1	1	1	7	7	7	7	7	7	7	7	7	7	7	7	7	7	7	7	7	7	7	7	7	7	7	7	7	7	7	7	7	7	7	7	。
1883	2	3	3	2	4	1	1	1	2	3	2	5	3	3	5	4	4	5	4	6	5	6	6	5	4	4	5	4	5	3	3	3	4	4	4	4	5	4	6	4	4	5	4	无
1884	1	3	3	2	2	3	3	4	2	3	3	3	3	3	3	3	3	3	3	3	3	3	3	3	3	3	3	3	3	3	3	3	3	3	3	3	3	3	3	3	3	3	3	无
1885	1	3	3	2	3	2	2	2	1	2	3	7	7	6	7	5	7	7	7	7	7	6	7	6	6	6	5	7	6	6	7	7	6	7	7	5	6	6	6	5	6	7	7	暂无
1886	1	3	3	2	4	1	1	5	1	2	3	5	5	5	5	6	6	6	6	5	4	3	4	2	2	3	2	2	4	3	3	4	5	3	7	5	7	7	7	3	4	4	3	无
1887	1	3	3	2	4	1	1	3	2	2	1	3	4	3	3	4	3	3	3	3	3	4	4	3	4	3	4	4	3	4	4	4	3	4	4	4	4	4	3	4	4	4	3	无
1888	2	3	3	2	1	3	3	2	2	2	1	5	5	5	5	5	5	5	5	5	5	5	5	5	5	5	5	5	4	4	4	4	4	4	5	5	4	4	5	5	4	5	4	无
1889	2	3	3	2	4	1	1	1	2	2	1	4	5	4	5	3	5	4	4	5	4	5	4	5	6	5	4	6	5	4	4	5	4	5	4	6	4	5	4	5	4	4	5	无
1890	2	3	3	2	1	3	2	2	2	2	4	4	4	4	4	4	4	4	4	4	4	4	4	4	4	4	4	4	4	4	4	4	4	4	4	4	4	4	4	4	4	4	4	无
1891	2	3	5	1	4	1	1	4	2	2	1	7	7	7	7	7	7	7	7	7	7	7	7	7	7	7	7	7	7	7	7	7	7	7	7	7	7	7	7	7	7	7	7	无
1892	2	3	3	2	4	1	1	2	2	1	4	2	2	2	4	3	2	3	2	2	3	2	2	3	3	3	3	3	3	3	3	3	3	3	3	3	3	3	3	3	3	3	3	无
1893	2	3	2	2	2	2	2	3	2	2	3	4	4	4	4	4	4	4	4	5	6	6	6	5	5	5	5	7	6	5	5	4	6	7	6	6	7	7	7	5	4	5	4	无
1894	2	3	3	2	4	1	1	2	1	1	1	5	2	4	5	5	4	5	5	4	5	4	4	5	4	5	4	5	4	4	3	3	4	4	4	4	4	4	4	4	5	4	3	无
1895	1	3	3	2	2	1	2	4	2	1	1	7	7	7	7	7	7	7	7	7	7	7	7	7	7	7	7	7	7	7	7	7	7	7	7	7	7	7	7	7	7	7	7	无
1896	1	3	3	2	4	1	2	3	2	3	3	5	5	5	5	5	5	5	5	5	5	5	5	5	5	5	5	5	5	5	5	5	5	5	5	5	5	5	5	5	5	5	5	无
1897	1	3	3	2	2	3	3	1	1	1	3	7	7	7	7	7	7	7	7	7	7	7	7	6	6	6	6	6	6	6	6	6	6	6	6	7	7	6	7	7	7	7	4	无
1898	1	1	5	2	2	2	2	3	1	1	1	4	4	6	6	5	4	6	5	4	5	5	5	4	6	5	5	5	5	5	4	3	4	4	4	5	5	7	6	5	6	6	4	多设置一些与时俱进的课程
1899	2	3	3	2	4	1	1	1	2	3	3	4	4	4	4	4	4	4	4	4	5	5	5	5	4	5	5	5	5	6	6	5	6	6	5	4	5	6	6	4	5	5	5	无
1900	1	3	3	2	2	1	1	4	2	1	1	7	7	7	7	7	7	7	7	7	7	7	7	7	7	7	7	7	7	7	7	7	6	6	6	7	7	7	6	7	7	7	6	无
1901	1	3	3	2	2	2	1	3	2	2	1	7	7	7	7	7	7	7	7	7	7	7	7	7	7	7	7	7	7	7	7	7	7	7	7	7	7	7	7	7	7	7	7	无
1902	2	1	5	2	1	3	3	4	2	3	4	2	2	2	5	7	7	7	7	5	5	5	5	5	5	5	5	4	4	4	4	6	6	3	6	5	6	6	6	3	2	2	2	没有啥不足
1903	1	3	3	2	4	1	1	5	2	3	1	4	3	6	7	6	6	7	5	6	6	7	6	5	5	3	6	6	6	4	3	2	6	2	4	4	4	4	4	4	2	5	3	有些脱离实践
1904	2	1	3	2	2	3	3	5	2	2	4	1	1	1	7	5	1	7	4	7	7	4	1	4	2	2	2	6	4	3	2	1	1	1	1	1	2	2	2	3	2	2	2	无
1905	1	3	3	2	4	1	1	2	2	2	1	5	5	5	5	5	5	5	5	5	5	5	5	5	5	5	5	5	5	5	5	5	5	5	5	5	5	5	5	5	5	5	5	无
1906	1	3	3	2	4	1	1	3	2	2	1	5	4	5	5	4	3	3	4	5	5	5	5	5	5	5	5	5	5	6	4	3	4	2	2	5	5	5	5	5	6	6	6	无
1907	1	3	3	2	2	2	2	2	1	2	3	7	7	7	7	7	7	7	7	7	7	7	7	7	7	7	7	7	7	7	7	7	7	7	7	7	7	7	7	7	7	7	7	无
1908	2	3	3	2	4	1	1	2	1	2	1	4	4	4	4	4	4	4	4	4	4	4	4	4	4	4	4	4	4	4	4	4	4	4	4	4	4	4	4	4	4	4	4	。
1909	2	3	3	2	4	2	2	2	2	1	1	5	5	5	5	5	5	5	5	4	4	5	5	5	5	5	5	5	5	5	5	4	5	4	4	5	5	5	5	5	5	5	5	无
1910	2	3	3	2	2	2	2	5	2	2	2	4	4	4	4	4	4	4	4	4	4	4	4	4	4	4	4	4	4	4	4	4	4	4	4	4	4	4	4	4	4	4	4	无
1911	2	3	3	2	4	1	1	1	2	1	3	4	2	3	5	5	4	5	6	6	4	4	6	4	5	4	3	6	7	1	2	1	4	3	4	4	4	4	4	5	5	5	6	无
1912	2	3	3	2	2	1	2	1	2	2	1	5	3	3	5	4	4	4	4	3	4	4	4	3	4	3	4	4	3	3	3	2	3	2	3	3	2	2	2	3	3	3	3	无
1913	2	3	3	2	4	2	1	3	2	2	3	7	7	6	6	5	5	5	5	6	6	6	6	6	6	6	6	6	6	6	6	5	6	5	7	5	4	4	4	6	6	6	6	worenwe
1914	2	3	1	2	4	4	2	1	1	1	1	7	7	7	7	7	6	5	4	2	3	4	5	5	5	5	5	5	6	4	7	7	1	7	1	5	3	5	3	7	7	7	7	无
1915	2	3	2	2	4	1	1	1	1	2	1	7	3	4	6	5	6	6	4	7	7	4	4	6	6	6	6	7	7	7	6	4	4	4	4	7	7	7	7	6	6	6	6	无
1916	1	3	2	2	2	3	2	5	1	3	1	2	2	2	2	2	2	2	2	2	2	2	2	2	2	2	2	2	2	2	2	2	2	2	2	2	2	2	2	2	2	2	2	无
1917	2	3	3	2	3	1	1	1	2	2	1	6	5	4	6	6	6	5	5	5	5	5	4	5	5	5	5	5	4	5	5	5	4	4	4	6	6	6	6	6	6	6	4	无
1918	2	3	2	2	2	1	1	1	1	2	2	6	5	4	5	6	6	6	6	6	6	3	4	6	6	6	4	6	6	6	3	2	2	2	2	4	4	3	5	4	4	4	3	无
1919	2	3	2	2	3	3	1	3	2	3	1	4	4	4	3	1	1	1	4	5	5	5	5	3	2	2	4	6	7	6	4	2	2	2	4	2	1	1	3	4	4	4	4	少让学生做ppt上台去讲 一点用也没有
1920	2	3	3	2	4	1	1	1	2	2	3	4	4	3	4	4	4	4	4	3	4	5	4	4	4	4	4	4	4	4	4	4	4	5	5	4	4	4	4	4	4	4	4	无
1921	2	3	3	2	4	1	1	2	2	2	1	7	7	7	7	7	7	7	7	7	7	7	7	7	7	7	7	7	7	7	7	7	7	7	7	7	7	7	7	7	7	7	7	无
1922	1	3	3	2	3	1	1	2	1	2	4	4	4	4	4	4	4	4	4	4	4	4	4	4	4	4	4	4	4	4	4	4	4	4	4	4	4	4	4	4	4	4	4	无
1923	1	3	3	2	4	1	1	1	2	2	1	5	6	5	5	5	5	5	5	5	5	5	5	5	5	5	5	5	5	5	5	5	5	5	5	5	5	5	5	5	5	5	5	面试建议
1924	2	3	5	2	4	1	1	3	2	2	3	4	4	4	4	4	4	4	4	4	4	4	4	4	4	4	4	4	4	4	4	4	4	4	4	4	4	4	4	4	4	4	4	无
1925	2	3	2	2	2	1	1	3	2	1	3	4	4	4	4	4	4	4	4	4	4	4	4	4	4	4	4	4	4	4	4	4	4	4	4	4	4	4	4	4	4	4	4	无
1926	2	3	3	2	1	1	1	3	2	1	3	4	3	2	5	3	4	4	4	4	4	3	4	4	5	4	4	6	3	3	3	2	5	2	3	3	4	3	5	3	2	4	2	无
1927	2	3	3	2	2	2	2	1	2	2	1	7	5	5	6	5	5	7	6	7	7	7	7	5	4	4	5	5	7	5	4	4	7	5	5	5	4	6	7	5	5	7	5	无
1928	1	3	3	2	1	3	3	1	1	1	1	6	6	6	6	6	6	6	6	6	6	6	6	6	6	6	6	6	6	6	6	6	6	6	6	6	6	6	6	6	6	6	6	无
1929	2	3	3	2	1	3	2	2	2	1	1	5	5	5	5	5	5	5	5	5	5	5	5	5	5	5	5	5	5	5	5	5	5	5	5	5	5	5	5	5	5	5	5	无
1931	2	3	3	2	4	1	1	2	2	1	1	7	7	6	7	4	4	6	5	7	7	7	7	7	7	7	7	7	7	7	7	2	2	2	2	5	5	5	5	6	5	6	6	无
1932	2	4	5	2	4	2	1	2	2	3	4	4	4	4	4	4	4	4	4	4	4	4	4	4	4	4	4	4	4	4	4	4	4	4	4	4	4	4	4	4	4	4	4	无
1933	1	1	3	1	1	2	3	3	1	2	1	3	1	4	7	4	1	7	4	1	4	1	4	4	4	4	4	7	3	3	3	3	3	1	2	3	7	4	7	3	3	4	4	无
1934	2	1	5	2	2	2	2	1	1	1	1	6	6	6	6	5	5	5	5	5	5	5	5	5	5	5	5	5	5	5	5	5	5	5	5	5	5	5	5	5	5	5	5	无
1935	1	2	2	1	2	1	2	4	2	3	1	3	3	3	3	3	3	3	3	3	3	3	3	3	3	3	3	3	3	3	3	3	3	3	3	3	3	3	3	3	3	3	3	无
1936	2	3	3	2	2	2	2	1	1	2	3	4	4	4	4	4	4	4	4	4	4	4	4	4	4	4	4	4	4	4	4	4	4	4	4	4	4	4	4	4	4	4	4	无
1937	2	3	3	1	4	2	2	1	1	1	1	7	7	7	7	7	7	7	7	7	7	7	7	7	7	7	7	7	7	7	7	7	7	7	7	7	7	7	7	7	7	7	7	无
1938	2	3	3	2	1	3	2	2	1	2	1	6	5	6	6	6	6	6	6	6	6	6	6	6	6	6	6	6	6	6	6	6	6	7	6	6	7	6	6	6	7	7	7	无
1939	1	1	1	2	4	1	1	1	1	1	1	7	7	7	7	7	7	7	7	7	7	7	7	7	7	7	7	7	7	7	7	7	7	7	7	7	7	7	7	7	7	7	7	哈哈
1940	2	1	2	2	4	1	1	1	2	3	1	6	4	3	6	2	3	6	4	5	5	5	5	4	5	5	4	6	6	6	6	4	5	4	5	5	5	4	6	6	5	5	5	无
1941	2	3	3	2	1	3	3	1	2	1	4	6	2	5	7	4	6	6	6	7	6	7	7	7	6	7	6	7	7	5	5	6	6	6	4	6	6	6	7	6	7	7	7	我觉得政治与公共管理学院在设置公共事业管理的专业课程时非常的合理，在考研备考时我深切地感受到了，课程设置由浅入深，十分适合考研学习的知识储备与专业素养。但是公共管理研究方法这门课系统学习了stata的运用，但是stata熟练运用的前提是掌握统计学相关知识，23级公共事业管理专业未学过统计学我觉得略有遗憾，不过我已经自学弥补了这一缺失。
1942	1	1	3	2	2	1	1	3	1	1	1	5	6	5	5	5	5	6	6	4	6	5	6	6	4	5	7	6	7	5	6	5	6	6	5	5	6	7	7	7	5	5	5	wu
1943	1	2	3	2	2	3	2	4	1	1	1	7	7	7	7	7	7	7	7	7	7	7	7	7	7	7	7	7	7	7	7	7	7	7	7	7	7	7	7	7	7	7	7	无
1944	2	3	2	2	2	2	1	4	2	3	4	4	4	4	4	4	4	4	4	4	4	4	4	4	4	4	4	4	4	4	4	4	4	4	4	4	4	4	4	4	4	4	4	无
1945	2	3	2	2	3	1	1	1	1	2	1	6	5	4	5	5	6	6	6	6	6	6	5	4	4	4	4	5	5	5	6	5	5	5	5	5	5	5	5	5	5	5	5	无
1946	2	1	3	2	2	1	1	4	2	2	2	4	4	4	4	4	4	4	4	4	4	4	4	4	4	4	4	4	4	4	4	4	4	4	4	4	4	4	4	4	4	4	4	非常好
1947	2	1	3	2	4	1	1	1	2	2	1	6	6	6	6	6	4	5	4	6	6	3	3	5	6	4	5	5	4	6	6	5	3	5	6	6	6	7	6	5	6	5	5	无
1948	2	1	3	2	2	3	3	4	1	1	4	1	1	1	1	3	2	2	2	4	4	2	3	3	2	3	2	3	2	3	2	3	3	2	3	3	3	4	4	4	4	4	4	无
1949	2	3	3	2	3	3	3	3	1	2	1	7	7	7	7	7	7	7	4	7	7	7	7	7	7	7	7	6	6	7	7	6	6	5	6	6	6	6	6	6	6	7	6	无
1950	2	3	2	2	4	1	1	3	2	2	1	6	6	6	6	5	5	5	5	5	5	5	5	5	5	5	5	5	5	5	5	5	5	5	5	5	5	5	5	5	5	5	5	无
1951	2	3	2	2	4	1	1	2	2	3	1	4	4	4	4	4	4	4	4	4	4	4	4	4	4	4	4	4	4	4	4	4	4	4	4	4	4	4	4	4	4	4	4	无
1952	2	3	2	2	4	3	1	4	2	2	3	4	4	3	4	4	4	4	4	4	4	4	4	4	4	4	4	4	4	4	4	4	4	4	4	4	4	4	4	4	4	4	4	无
1953	2	3	3	2	2	1	1	3	2	1	1	7	7	7	7	7	7	7	7	7	7	7	7	7	7	7	7	7	7	7	7	7	7	7	7	7	7	7	7	7	7	7	7	无
1954	2	1	3	2	2	2	2	1	1	2	4	7	4	4	7	4	3	5	4	4	5	4	5	4	5	5	4	4	5	4	5	4	5	4	5	4	4	4	4	4	5	4	4	无
1955	2	1	5	2	3	2	2	2	2	1	1	4	4	4	4	4	4	4	4	4	4	4	4	4	4	4	4	4	4	4	4	4	4	4	4	4	4	4	4	4	4	4	4	无
1956	2	1	3	2	2	3	3	4	1	2	1	6	6	6	6	6	6	6	6	6	6	6	6	6	6	6	6	6	6	6	6	6	6	6	6	6	6	6	6	6	6	6	6	无
1957	2	1	3	2	1	3	3	2	1	1	1	2	3	3	3	3	3	3	3	3	3	3	3	3	3	3	3	3	3	3	3	3	3	3	3	3	3	3	3	3	3	3	3	无
1958	1	1	3	2	2	3	3	1	2	1	4	6	5	6	6	5	5	5	5	4	5	5	4	5	4	5	4	5	4	5	4	4	3	5	3	5	3	5	3	5	3	5	5	可以帮助了解专业知识
1959	2	3	3	2	4	1	1	5	2	3	1	4	4	4	4	4	4	4	4	4	4	4	4	4	4	4	4	4	4	4	4	4	4	4	4	4	4	3	3	3	5	3	4	无
1960	2	3	3	2	3	1	1	4	2	2	1	5	5	3	4	4	4	4	4	3	4	4	4	3	4	4	5	5	5	4	3	4	3	4	4	4	4	3	3	3	4	4	4	无
1961	2	1	3	2	2	1	2	3	2	1	4	7	7	7	7	7	7	7	7	7	7	7	7	7	7	7	7	7	7	7	7	7	7	7	7	7	7	7	7	7	7	7	7	提供实习单位
1962	2	1	3	2	2	3	3	2	1	2	4	4	3	5	5	5	5	5	4	4	4	4	4	4	4	4	4	5	5	4	4	4	5	5	4	7	7	7	7	7	7	7	7	无
1963	2	3	2	2	2	1	1	3	2	1	1	3	3	3	3	3	3	3	3	3	3	3	3	3	3	3	3	3	3	3	3	3	3	3	3	3	3	3	3	3	3	3	3	职业规划
1964	2	3	3	2	4	3	1	2	2	2	1	5	5	5	5	5	5	5	5	4	4	4	4	4	4	4	4	4	4	4	4	4	4	4	4	4	4	4	4	4	4	4	4	无
1965	1	3	3	2	2	1	1	2	1	2	4	4	4	4	4	4	4	4	4	4	4	4	4	4	4	4	4	4	4	4	4	4	4	4	4	4	4	4	4	4	4	4	4	无
1966	2	3	3	2	2	2	2	2	2	3	3	4	5	4	5	4	4	5	5	5	5	6	4	4	4	4	5	6	5	4	4	3	5	3	4	5	5	5	5	5	5	5	5	无
1967	1	3	3	2	2	2	2	5	2	1	3	7	7	7	7	7	7	7	7	7	7	7	7	7	7	7	7	7	7	7	7	7	7	7	7	7	7	7	7	7	7	7	7	无
1968	1	3	3	2	4	2	2	5	2	2	1	7	7	7	7	7	7	7	7	7	7	7	7	7	7	7	7	7	7	7	7	7	7	7	7	7	7	7	7	7	7	7	7	无
1970	2	3	2	2	4	2	2	1	2	1	1	4	4	4	4	4	4	4	4	4	4	4	4	4	4	4	4	4	4	4	4	4	4	4	4	4	4	4	4	4	4	4	4	无
1972	1	3	3	2	3	3	1	4	1	1	3	7	4	7	7	7	7	7	7	7	7	7	7	7	7	7	7	7	7	7	7	7	7	7	7	7	7	7	7	7	7	7	7	无
1973	2	3	5	2	4	1	1	3	2	2	1	3	2	2	6	2	2	2	6	2	6	2	2	2	2	2	2	6	3	3	3	3	3	3	3	3	3	3	6	3	3	3	3	无
1974	2	1	3	2	4	1	1	3	1	1	1	7	4	6	7	6	6	6	6	7	6	6	6	5	5	5	6	6	4	5	4	3	5	5	5	5	4	4	5	5	5	5	4	学校或专业与更多企业建立合作关系，为学生提供更多的实习岗位。安排学生在合适的学期进入企业实习
1975	1	3	1	2	3	3	1	1	2	1	1	4	4	4	4	4	4	4	4	4	4	4	4	4	4	4	4	4	4	4	4	4	4	4	4	4	4	4	4	4	4	4	4	五
1976	2	3	3	2	2	2	1	1	2	2	1	5	5	5	5	5	5	5	5	5	5	5	5	5	5	5	5	5	5	5	5	5	5	5	5	5	5	5	5	5	5	5	5	su无
1977	1	3	2	2	4	1	1	5	2	1	4	4	3	6	5	5	5	4	5	4	6	5	4	4	4	3	5	5	6	5	3	3	5	3	4	4	3	3	6	4	4	5	4	无
1978	1	1	3	2	4	1	1	2	1	1	4	4	4	4	4	4	4	4	4	4	4	4	4	4	4	4	4	4	4	4	4	4	4	4	4	4	4	4	4	4	4	4	4	无
1979	1	3	3	2	4	1	1	1	2	1	1	5	5	5	5	5	5	5	5	5	5	5	5	5	5	5	5	5	5	5	5	5	5	5	5	5	5	5	5	5	5	5	5	无
1980	2	3	5	2	2	2	2	1	1	1	3	7	7	7	7	7	7	7	7	7	7	7	7	7	7	7	7	7	7	7	7	7	7	7	7	7	7	7	7	7	7	7	7	无
1981	1	1	3	2	2	2	2	3	2	3	4	4	4	4	4	4	4	4	4	4	4	4	4	4	4	4	4	4	4	4	4	4	4	4	4	4	4	4	4	4	4	4	4	?
1982	2	3	3	2	4	1	1	1	1	1	3	7	7	7	7	7	7	7	7	7	7	7	7	7	7	7	7	7	7	7	7	7	7	7	7	7	7	7	7	7	7	7	7	社会调查
1983	2	3	2	2	4	1	1	2	2	3	4	6	6	6	6	6	6	6	6	6	6	6	6	6	6	6	6	6	6	6	6	6	6	6	6	5	5	5	5	5	5	5	5	无
1984	2	3	2	2	3	2	1	3	2	2	1	3	3	3	3	3	3	3	3	3	3	3	3	3	3	3	3	3	3	3	3	3	3	3	3	3	3	3	3	3	3	3	3	无
1985	2	1	3	2	4	1	1	5	2	2	1	2	2	2	2	2	2	2	2	2	2	2	2	2	2	2	2	2	2	3	3	3	3	2	2	2	2	2	2	2	2	2	2	无
1986	2	3	2	2	4	1	1	1	2	1	4	2	1	2	2	4	3	3	3	3	3	3	3	3	3	3	3	3	3	3	3	3	3	3	3	3	3	3	3	3	3	3	3	无
1987	1	3	2	2	1	2	2	2	1	1	3	7	7	7	7	7	7	7	7	7	7	7	7	7	7	7	7	7	7	7	7	7	7	7	7	7	7	7	7	7	7	7	7	无
1988	2	1	3	2	1	3	3	5	1	3	4	1	1	1	7	1	1	1	1	1	1	1	1	7	7	7	7	7	7	7	7	7	7	7	7	6	6	4	4	7	7	7	5	无
1989	2	1	3	2	2	1	1	4	2	1	1	7	7	7	7	7	7	7	7	7	7	7	7	7	7	7	7	7	7	7	7	7	7	7	7	7	7	7	7	7	7	7	7	无
1990	2	1	2	2	2	3	2	1	1	1	4	4	5	4	5	5	3	4	4	5	4	5	3	4	5	4	5	4	4	5	4	4	5	4	5	4	5	4	5	5	4	5	4	无
1991	2	4	5	1	4	1	1	2	2	1	3	4	4	4	5	3	3	3	3	3	3	3	3	4	4	3	3	4	3	4	4	3	3	3	3	3	3	3	3	4	3	3	4	给同学们多谋点出路，，提供更好的工作机会，提供考研考公等指导
1992	2	1	3	2	4	1	1	5	2	2	4	7	7	7	7	7	7	5	6	6	7	7	7	7	7	7	7	6	7	7	7	7	7	7	7	7	7	7	7	7	7	7	7	没有什么建议
1993	2	1	3	2	4	3	2	2	2	2	4	1	1	5	5	4	4	7	4	2	5	2	5	2	2	2	3	5	2	4	1	1	4	3	4	4	2	2	3	2	2	2	2	无
1994	2	3	3	2	4	1	1	2	2	3	4	4	4	4	4	4	4	4	4	4	4	4	4	4	4	4	4	4	4	4	4	4	4	4	4	4	4	4	4	4	4	4	4	无
1995	1	3	3	2	2	3	3	3	1	1	2	4	4	5	4	6	6	6	6	7	6	6	6	6	6	6	6	6	6	6	6	6	6	6	6	6	6	6	6	6	6	6	6	无
1996	2	1	5	2	4	2	2	4	2	2	1	4	4	4	4	4	4	4	4	4	4	4	4	4	4	4	4	4	4	4	4	4	4	4	4	4	4	4	4	4	4	4	4	无
1997	2	3	5	2	2	3	3	3	1	2	1	4	3	4	5	4	4	4	4	4	4	4	4	4	4	4	4	4	4	4	4	4	4	4	4	4	4	4	4	4	4	4	4	无
1998	2	3	2	2	4	1	1	2	2	2	3	5	3	3	3	3	3	3	4	6	6	5	5	4	4	4	3	4	5	4	2	2	2	2	2	5	4	4	6	5	4	4	2	无
1999	2	4	2	2	2	3	3	3	2	2	1	4	4	4	4	4	4	4	4	5	5	5	5	4	4	4	4	4	4	4	4	4	4	4	4	4	4	4	4	4	4	4	4	无
2000	2	1	3	2	2	2	3	3	1	2	4	6	5	4	6	5	5	4	6	5	7	5	4	6	5	6	6	6	6	5	4	4	5	5	5	5	5	6	6	7	7	6	7	无
2001	1	3	3	2	4	1	1	1	2	1	3	4	5	4	5	4	4	4	4	4	4	4	4	4	4	4	4	4	4	4	4	4	4	4	4	4	4	4	4	4	4	4	4	无
2002	1	3	5	2	3	2	1	2	1	3	2	4	4	4	4	1	1	1	4	4	4	4	4	4	4	4	4	4	4	4	4	4	4	4	4	4	4	4	4	4	4	4	4	无
2003	1	3	3	2	2	3	2	3	1	2	1	4	4	4	4	4	4	4	4	4	4	4	4	4	4	4	4	4	4	4	4	4	4	4	4	4	4	4	4	4	4	4	4	无
2004	2	1	3	2	2	2	2	3	1	2	4	5	3	4	5	5	4	5	5	4	4	3	4	4	4	4	4	4	4	4	4	4	4	4	4	4	4	4	4	4	4	4	4	无
2005	1	3	3	2	1	3	4	5	2	1	1	7	7	7	7	7	7	7	7	7	7	7	7	7	7	7	7	7	7	7	7	7	7	7	7	7	7	7	7	7	7	7	7	无
2006	2	1	3	2	4	2	2	2	1	3	4	3	3	3	3	3	3	3	3	4	4	4	4	4	4	4	4	4	4	4	4	4	4	4	4	4	4	4	4	4	4	4	4	无
2007	2	4	2	2	2	3	3	2	1	1	3	5	5	4	5	4	4	4	4	3	3	5	4	5	4	5	4	5	4	5	4	2	2	2	4	5	5	5	5	5	5	5	4	无
2008	1	1	3	2	2	2	2	3	1	2	1	5	5	5	5	5	4	4	5	5	5	5	4	5	4	4	5	5	5	3	5	6	4	5	4	5	5	6	6	6	5	6	5	无
2009	2	3	3	2	4	1	2	2	2	1	1	5	5	5	5	5	5	5	5	5	5	5	5	5	5	5	5	5	5	5	5	5	5	5	5	5	5	5	5	5	5	5	5	无
2010	2	1	3	2	4	1	1	3	2	2	4	4	3	4	4	4	4	4	4	4	4	4	4	4	4	4	5	4	5	3	4	4	3	4	4	4	5	5	4	5	5	5	5	对考公有帮助
2011	1	3	3	2	4	3	1	5	2	2	4	4	5	4	5	5	4	5	4	5	4	5	4	5	4	5	4	5	4	5	4	4	5	5	5	4	4	6	6	6	5	4	5	好
2012	1	3	3	2	1	1	1	5	1	1	3	7	7	7	7	7	7	6	7	7	7	7	7	7	7	6	7	7	6	7	7	7	7	7	7	7	7	7	7	7	7	7	7	无
2013	2	1	3	2	4	3	3	2	2	1	1	5	5	5	5	5	5	5	5	5	5	5	5	5	5	5	5	5	5	5	5	5	5	5	5	5	5	5	5	5	5	5	5	无
2014	2	3	3	2	2	2	2	3	1	1	3	5	5	7	5	6	6	6	6	6	5	6	6	4	4	5	4	4	4	5	3	4	5	3	3	4	3	3	5	3	3	5	5	无
2015	2	4	3	2	1	3	3	3	2	3	1	4	4	4	4	4	4	4	4	4	4	4	4	4	4	4	4	4	4	4	4	4	4	4	4	4	4	4	4	4	4	4	4	无
2016	2	3	2	2	3	2	1	5	2	2	4	4	4	4	4	3	3	3	3	3	3	3	3	3	3	3	3	5	5	5	5	4	4	4	4	4	4	4	4	4	4	4	4	无
2017	2	3	5	2	2	3	3	1	2	1	3	4	4	4	4	4	4	4	4	4	4	4	4	4	4	4	4	4	4	4	4	4	4	4	4	4	4	4	4	4	4	4	4	实事求是
2018	2	3	2	2	4	2	2	1	1	2	2	4	4	4	4	4	4	4	4	4	4	4	4	4	4	4	4	4	4	4	4	4	4	4	4	4	4	4	4	4	4	4	4	无
[truncated: 101 more rows]

## Sheet: Variable name comparison
Original list name	New column name
序号	id
1、性别:	gender
2、年级：	grade
3、您的专业属于：	major
4、您目前专业所属的本科类型是：	type
5、你的生源地（家庭所在地）:	hometown
6、父亲的受教育程度:	father_edu
7、母亲的受教育程度:	mother_edu
8、你上学期（或最近一学年）的综合成绩在班级排名大致为:	rank
9、你是否正在担任或担任过学生干部（班级、院系或社团）:	cadre
10、你是否参加过学校开设的“职业生涯规划”课程或相关讲座/活动?	career_course
11、您是否有过兼职或实习经历:	internship
12、职业探索(Career Exploration)—C1.我主动搜集过与所学专业相关的职业信息（如岗位要求、发展前景、薪资水平）。	C1
12、C2.我通过实习、兼职、访谈学长学姐或职场人士等方式，深入了解过目标职业。	C2
12、C3.我清楚自己心仪的职业领域需要具备哪些核心技能和资格证书。	C3
12、C4.我经常思考自己的兴趣、能力与未来职业的匹配度。	C4
13、职业目标清晰度(Career Clarity)—C5.我对毕业后想从事的行业或岗位有比较清晰的方向。	C5
13、C6.我有一个明确的职业发展愿景（如成为技术专家、管理者、创业者等）。	C6
13、C7.我设定的职业目标符合我个人的价值观和兴趣。	C7
13、C8.我知道为了实现职业目标，我在大学期间需要完成哪些关键任务。	C8
14、职业规划执行力(Career Planning)—C9.我为实现职业目标制定了具体的学习或发展计划（如如参赛、考证、考研等）。	C9
14、C10.我会根据职业目标的变化，及时调整我的学习计划和重点。	C10
14、C11.我目前的选课、考证、实习等活动，都是围绕我的职业目标来安排的。	C11
14、C12.我认为所学内容能够帮助我实现未来职业目标。	C12
15、认知投入(Cognitive Engagement)—S1.我会将课堂上所学的知识与已有的经验或现实问题联系起来思考。	S1
15、S2.当阅读教材或文献时，我会试图批判性地审视其中的观点。	S2
15、S3.我会花时间深入探究某个感兴趣的专业问题，而不仅仅是应付考试。	S3
15、S4.我经常反思自己的学习方法，并试图找到改进的方式。	S4
16、行为投入(Behavioral Engagement)—S5.我能够按时、认真地完成老师布置的作业或课程设计。	S5
16、S6.除了上课，我每周花费较长时间在自主学习上（如复习、阅读、练习）。	S6
16、S7.即使课程内容枯燥或困难，我也会坚持学下去。	S7
16、S8.我会积极参与课堂讨论，主动向老师提问。	S8
17、实践/技能投入(Practical Engagement)—S9.我课余时间会主动去实验室、实训室或工作室练习操作技能。	S9
17、S10.我积极准备并考取与专业相关的职业资格证书或技能等级证书。	S10
17、S11.我会关注并尝试参加专业技能竞赛、创新创业大赛或科研项目。	S11
17、S12.我会主动寻找机会参与社会实践、企业实习或兼职（与专业相关）。	S12
18、专业认同(Professional Identity)—I1.我对现在所学的专业充满热情。	I1
18、I2.我愿意向他人（如生源学校学弟学妹、亲友等）推荐我的专业。	I2
18、I3.提到所学专业，我会有一种归属感和自豪感。	I3
18、I4.我认可所学专业的社会价值和贡献。	I4
19、学习自我效能感(Academic Self-Efficacy)—I5.我有信心能够掌握课堂上所学的专业知识和技能。	I5
19、I6.我相信自己能够理解本专业学习中最复杂的内容。	I6
19、I7.面对困难的学习任务，我坚信自己能够完成。	I7
19、I8.与其他同学相比，我认为自己学习专业课程的能力更强。	I8
20、你认为目前本专业的课程设置、教学方式或实践环节，对你实现职业规划有哪些具体的帮助或不足?应如何提升和改进以帮助你实现职业规划？（您的建议对我们的研究很有价值）	open_text
