# Supplementary material
Source: Research Square preprint supplement (doi:10.21203/rs.3.rs-9812393/v1)
Supplement: Supplementary file 6 [file 7f7d3e11e76e96738081183f.docx]

**Supplementary File B: Variable Details, Coding Scheme, and Transformations**

**Study title: Exploring the effect of career planning on learning engagement: evidence from vocational and applied undergraduates in China**

Purpose: This file provides the variable definitions, coding schemes, and transformations applied to the dataset used in the study. It is prepared as an anonymized supplementary document for peer review.

**1. Dataset Structure**

| **Dataset element** | **Description** |
| --- | --- |
| Unit of analysis | Individual student respondent |
| Raw questionnaire source | Student Career Planning and Learning Behavior Survey Questionnaire |
| Final valid sample size | 2,100 valid questionnaires after data cleaning |
| Main variable groups | Basic information controls; career planning items; learning engagement items; professional identity items; academic self-efficacy items; optional open-ended feedback |
| Analytical approach | Multiple linear regression, dimension-specific regression, mediation analysis, and heterogeneity/moderation testing by undergraduate type |

**2. Basic Information and Control Variables**

| **Variable name** | **Definition** | **Role** | **Coding scheme** | **Transformation/use** |
| --- | --- | --- | --- | --- |
| gender | Gender | Control variable | 1 = Male; 2 = Female | Converted to a categorical factor in regression models |
| grade | Grade level | Control variable | 1 = Year 1; 2 = Year 2; 3 = Year 3; 4 = Year 4 | Converted to a categorical factor in regression models |
| major | Major category | Control variable | 1 = Science and engineering; 2 = Economics, management, accounting, or law; 3 = Humanities and social sciences; 4 = Arts or sports; 5 = Agriculture, forestry, or medicine | Converted to a categorical factor in regression models |
| type | Undergraduate type | Control / grouping variable | 1 = Vocational undergraduate; 2 = Aoolied undergraduate | Converted to a categorical factor in regression models |
| hometown | Place of origin / family location | Control variable | 1 = Municipality/provincial capital; 2 = Prefecture-level or county-level city; 3 = Town; 4 = Rural area | Converted to a categorical factor in regression models |
| father_edu | Father's education level | Control variable | 1 = Junior high school or below; 2 = Senior high school/secondary vocational school; 3 = Junior college/bachelor degree; 4 = Graduate degree or above | Converted to a categorical factor in regression models |
| mother_edu | Mother's education level | Control variable | 1 = Junior high school or below; 2 = Senior high school/secondary vocational school; 3 = Junior college/bachelor degree; 4 = Graduate degree or above | Converted to a categorical factor in regression models |
| rank | Approximate class ranking in the previous semester or academic year | Control variable | 1 = Top 20%; 2 = 20%-40%; 3 = 40%-60%; 4 = 60%-80%; 5 = Bottom 20% | Converted to a categorical factor in regression models |
| cadre | Student leadership experience | Control variable | 1 = Yes; 2 = No | Converted to a categorical factor in regression models |
| career_course | Participation in career planning courses, lectures, or activities | Control variable | 1 = Completed a systematic career planning course; 2 = Attended lectures/activities but not a systematic course; 3 = Never participated | Converted to a categorical factor in regression models |
| internship | Part-time work or internship experience | Control variable | 1 = Part-time work experience; 2 = Internship experience; 3 = Both part-time work and internship experience; 4 = Neither | Converted to a categorical factor in regression models |

**3. Core Scale Item Variables**

| **Item** | **Construct** | **Dimension** | **Role** | **Item wording** | **Coding** |
| --- | --- | --- | --- | --- | --- |
| C1 | Career Planning | Career Exploration | Independent variable item | I have actively collected career information related to my major, such as job requirements, development prospects, and salary levels. | 1–7 Likert; higher values indicate a higher level of the construct |
| C2 | Career Planning | Career Exploration | Independent variable item | I have gained an in-depth understanding of my target occupation through internships, part-time work, or conversations with senior students or professionals. | 1-7 Likert; higher values indicate a higher level of the construct |
| C3 | Career Planning | Career Exploration | Independent variable item | I clearly know the core skills and qualification certificates required in my preferred career field. | 1-7 Likert; higher values indicate a higher level of the construct |
| C4 | Career Planning | Career Exploration | Independent variable item | I often think about the fit between my interests, abilities, and future career. | 1-7 Likert; higher values indicate a higher level of the construct |
| C5 | Career Planning | Career Goal Clarity | Independent variable item | I have a relatively clear direction regarding the industry or position I want to enter after graduation. | 1-7 Likert; higher values indicate a higher level of the construct |
| C6 | Career Planning | Career Goal Clarity | Independent variable item | I have a clear career development vision, such as becoming a technical specialist, manager, or entrepreneur. | 1-7 Likert; higher values indicate a higher level of the construct |
| C7 | Career Planning | Career Goal Clarity | Independent variable item | The career goals I have set are consistent with my personal values and interests. | 1-7 Likert; higher values indicate a higher level of the construct |
| C8 | Career Planning | Career Goal Clarity | Independent variable item | I know the key tasks I need to complete during university in order to achieve my career goals. | 1-7 Likert; higher values indicate a higher level of the construct |
| C9 | Career Planning | Career Planning Execution | Independent variable item | I have developed specific learning or development plans to achieve my career goals, such as entering competitions, obtaining certificates, or preparing for postgraduate study. | 1-7 Likert; higher values indicate a higher level of the construct |
| C10 | Career Planning | Career Planning Execution | Independent variable item | I adjust my learning plans and priorities in a timely manner when my career goals change. | 1-7 Likert; higher values indicate a higher level of the construct |
| C11 | Career Planning | Career Planning Execution | Independent variable item | My current course selection, certification preparation, internship, and related activities are arranged around my career goals. | 1-7 Likert; higher values indicate a higher level of the construct |
| C12 | Career Planning | Career Planning Execution | Independent variable item | I believe that what I am learning can help me achieve my future career goals. | 1-7 Likert; higher values indicate a higher level of the construct |
| S1 | Learning Engagement | Cognitive Engagement | Dependent variable item | I connect what I learn in class with my prior experience or real-world problems. | 1-7 Likert; higher values indicate a higher level of the construct |
| S2 | Learning Engagement | Cognitive Engagement | Dependent variable item | When reading textbooks or academic materials, I try to critically examine the ideas presented. | 1-7 Likert; higher values indicate a higher level of the construct |
| S3 | Learning Engagement | Cognitive Engagement | Dependent variable item | I spend time deeply exploring professional issues that interest me, rather than merely preparing for examinations. | 1-7 Likert; higher values indicate a higher level of the construct |
| S4 | Learning Engagement | Cognitive Engagement | Dependent variable item | I often reflect on my learning methods and try to find ways to improve them. | 1-7 Likert; higher values indicate a higher level of the construct |
| S5 | Learning Engagement | Behavioral Engagement | Dependent variable item | I complete assignments or course projects assigned by teachers carefully and on time. | 1-7 Likert; higher values indicate a higher level of the construct |
| S6 | Learning Engagement | Behavioral Engagement | Dependent variable item | In addition to attending classes, I spend considerable time each week on self-directed learning, such as reviewing, reading, and practicing. | 1-7 Likert; higher values indicate a higher level of the construct |
| S7 | Learning Engagement | Behavioral Engagement | Dependent variable item | Even when course content is boring or difficult, I persist in learning it. | 1-7 Likert; higher values indicate a higher level of the construct |
| S8 | Learning Engagement | Behavioral Engagement | Dependent variable item | I actively participate in classroom discussions and ask teachers questions. | 1-7 Likert; higher values indicate a higher level of the construct |
| S9 | Learning Engagement | Practical Engagement | Dependent variable item | In my spare time, I actively go to laboratories, training rooms, or studios to practice operational skills. | 1-7 Likert; higher values indicate a higher level of the construct |
| S10 | Learning Engagement | Practical Engagement | Dependent variable item | I actively prepare for and obtain professional qualification certificates or skill-level certificates related to my major. | 1-7 Likert; higher values indicate a higher level of the construct |
| S11 | Learning Engagement | Practical Engagement | Dependent variable item | I pay attention to and try to participate in professional skills competitions, innovation and entrepreneurship competitions, or research projects. | 1-7 Likert; higher values indicate a higher level of the construct |
| S12 | Learning Engagement | Practical Engagement | Dependent variable item | I actively seek opportunities to participate in social practice, enterprise internships, or part-time work related to my major. | 1-7 Likert; higher values indicate a higher level of the construct |
| I1 | Professional Identity | Professional Identity | Mediator item | I am enthusiastic about my current major. | 1-7 Likert; higher values indicate a higher level of the construct |
| I2 | Professional Identity | Professional Identity | Mediator item | I am willing to recommend my major to others, such as junior students, friends, or relatives. | 1-7 Likert; higher values indicate a higher level of the construct |
| I3 | Professional Identity | Professional Identity | Mediator item | When my major is mentioned, I feel a sense of belonging and pride. | 1-7 Likert; higher values indicate a higher level of the construct |
| I4 | Professional Identity | Professional Identity | Mediator item | I recognize the social value and contribution of my major. | 1-7 Likert; higher values indicate a higher level of the construct |
| I5 | Academic Self-Efficacy | Academic Self-Efficacy | Mediator item | I am confident that I can master the professional knowledge and skills taught in class. | 1-7 Likert; higher values indicate a higher level of the construct |
| I6 | Academic Self-Efficacy | Academic Self-Efficacy | Mediator item | I believe that I can understand the most complex content in my major. | 1-7 Likert; higher values indicate a higher level of the construct |
| I7 | Academic Self-Efficacy | Academic Self-Efficacy | Mediator item | When faced with difficult learning tasks, I firmly believe that I can complete them. | 1-7 Likert; higher values indicate a higher level of the construct |
| I8 | Academic Self-Efficacy | Academic Self-Efficacy | Mediator item | Compared with other students, I think I am more capable of learning professional courses. | 1-7 Likert; higher values indicate a higher level of the construct |

**4. Composite Variables and Transformations**

| **Variable name** | **Construct** | **Role** | **Formula/transformation** | **Interpretation** |
| --- | --- | --- | --- | --- |
| career_explore | Career exploration | Independent variable dimension | Mean(C1, C2, C3, C4) | Higher score = stronger career exploration |
| career_clarity | Career goal clarity | Independent variable dimension | Mean(C5, C6, C7, C8) | Higher score = clearer career goals |
| career_action | Career planning execution | Independent variable dimension | Mean(C9, C10, C11, C12) | Higher score = stronger career planning execution |
| career_plan | Overall career planning | Core independent variable | Mean(C1-C12) | Higher score = higher overall career planning level |
| cognitive_eng | Cognitive engagement | Dependent variable dimension | Mean(S1, S2, S3, S4) | Higher score = stronger cognitive engagement |
| behavior_eng | Behavioral engagement | Dependent variable dimension | Mean(S5, S6, S7, S8) | Higher score = stronger behavioral engagement |
| practical_eng | Practical engagement | Dependent variable dimension | Mean(S9, S10, S11, S12) | Higher score = stronger practical engagement |
| learn_engage | Overall learning engagement | Core dependent variable | Mean(S1-S12) | Higher score = higher overall learning engagement |
| prof_identity | Professional identity | Mediator | Mean(I1, I2, I3, I4) | Higher score = stronger identification with the major |
| acad_efficacy | Academic self-efficacy | Mediator | Mean(I5, I6, I7, I8) | Higher score = stronger academic self-efficacy |
| career_plan × type | Interaction between career planning and undergraduate type | Heterogeneity/moderation term | Product term between career_plan and type in the regression model | Used to test whether the effect of career planning differs by undergraduate type |

**5. Data Cleaning and Analytical Transformations**

| **Procedure** | **Description** |
| --- | --- |
| Duplicate handling | For records with identical basic information and identical scale responses, only the first valid questionnaire was retained. |
| Scale construction | Item-level responses were treated as numeric values from 1 to 7. Composite scale variables were calculated using row means of their corresponding items. |
| Categorical controls | Demographic and educational background variables were converted into categorical factors in the regression models. |
| Missing values | Composite variables were calculated using available item responses. Cases retained in the final analysis dataset were those meeting the validity and cleaning criteria. |
| Regression estimation | Multiple linear regression was used. Heteroskedasticity-robust standard errors of type HC3 were used in the regression output. |
| Mediation testing | Professional identity and academic self-efficacy were tested as mediators. Bootstrap procedures with 5,000 resamples were used to estimate indirect effects and confidence intervals. |

**6. Variable Name Comparison**

| **Dataset column name** | **Questionnaire item or variable meaning** |
| --- | --- |
| gender | Gender |
| grade | Grade level |
| major | Major category |
| type | Undergraduate type |
| hometown | Place of origin / family location |
| father_edu | Father's education level |
| mother_edu | Mother's education level |
| rank | Approximate class ranking in the previous semester or academic year |
| cadre | Student leadership experience |
| career_course | Participation in career planning courses, lectures, or activities |
| internship | Part-time work or internship experience |
| C1 | I have actively collected career information related to my major, such as job requirements, development prospects, and salary levels. |
| C2 | I have gained an in-depth understanding of my target occupation through internships, part-time work, or conversations with senior students or professionals. |
| C3 | I clearly know the core skills and qualification certificates required in my preferred career field. |
| C4 | I often think about the fit between my interests, abilities, and future career. |
| C5 | I have a relatively clear direction regarding the industry or position I want to enter after graduation. |
| C6 | I have a clear career development vision, such as becoming a technical specialist, manager, or entrepreneur. |
| C7 | The career goals I have set are consistent with my personal values and interests. |
| C8 | I know the key tasks I need to complete during university in order to achieve my career goals. |
| C9 | I have developed specific learning or development plans to achieve my career goals, such as entering competitions, obtaining certificates, or preparing for postgraduate study. |
| C10 | I adjust my learning plans and priorities in a timely manner when my career goals change. |
| C11 | My current course selection, certification preparation, internship, and related activities are arranged around my career goals. |
| C12 | I believe that what I am learning can help me achieve my future career goals. |
| S1 | I connect what I learn in class with my prior experience or real-world problems. |
| S2 | When reading textbooks or academic materials, I try to critically examine the ideas presented. |
| S3 | I spend time deeply exploring professional issues that interest me, rather than merely preparing for examinations. |
| S4 | I often reflect on my learning methods and try to find ways to improve them. |
| S5 | I complete assignments or course projects assigned by teachers carefully and on time. |
| S6 | In addition to attending classes, I spend considerable time each week on self-directed learning, such as reviewing, reading, and practicing. |
| S7 | Even when course content is boring or difficult, I persist in learning it. |
| S8 | I actively participate in classroom discussions and ask teachers questions. |
| S9 | In my spare time, I actively go to laboratories, training rooms, or studios to practice operational skills. |
| S10 | I actively prepare for and obtain professional qualification certificates or skill-level certificates related to my major. |
| S11 | I pay attention to and try to participate in professional skills competitions, innovation and entrepreneurship competitions, or research projects. |
| S12 | I actively seek opportunities to participate in social practice, enterprise internships, or part-time work related to my major. |
| I1 | I am enthusiastic about my current major. |
| I2 | I am willing to recommend my major to others, such as junior students, friends, or relatives. |
| I3 | When my major is mentioned, I feel a sense of belonging and pride. |
| I4 | I recognize the social value and contribution of my major. |
| I5 | I am confident that I can master the professional knowledge and skills taught in class. |
| I6 | I believe that I can understand the most complex content in my major. |
| I7 | When faced with difficult learning tasks, I firmly believe that I can complete them. |
| I8 | Compared with other students, I think I am more capable of learning professional courses. |
| open_text | Optional open-ended feedback on curriculum, teaching methods, practical components, and suggestions for improvement |
